# Supplementary material for: Metatranscriptomic changes in the propionate pathway and carbohydrate enzyme revealed the rebalancing mechanism of rumen microbiota after CH4 inhibition by 3-NOP
Source: Research Square preprint supplement (doi:10.21203/rs.3.rs-7121971/v1), 2025-08-11
Supplement: Supplementary file 1 [file 0ec2d81e951c4457847be233.xlsx]

## Sheet: mag abundance
Genome	specise	CYR10.clean.1.fq TPM	CYR11.clean.1.fq TPM	CYR12.clean.1.fq TPM	CYR13.clean.1.fq TPM	CYR14.clean.1.fq TPM	CYR15.clean.1.fq TPM	CYR16.clean.1.fq TPM	CYR17.clean.1.fq TPM	CYR18.clean.1.fq TPM	CYR1.clean.1.fq TPM	CYR2.clean.1.fq TPM	CYR3.clean.1.fq TPM	CYR4.clean.1.fq TPM	CYR5.clean.1.fq TPM	CYR6.clean.1.fq TPM	CYR7.clean.1.fq TPM	CYR8.clean.1.fq TPM	CYR9.clean.1.fq TPM
RGMC.10	d__Bacteria;p__UBA3054;c__UBA3054;o__UBA3054;f__UBA3054;g__UBA3054;s__UBA3054 sp002366995	1304.28	584.272	330.071	924.446	1151.74	773.8	1583.11	1038.07	1331.19	1628.8	1336.59	1322.29	1720.73	2007.16	1474.39	1456.49	1052.35	1058.42
RGMC.100	d__Bacteria;p__Bacillota_A;c__Clostridia;o__Oscillospirales;f__Oscillospiraceae;g__UBA1774;s__UBA1774 sp016286665	145.975	0	0	588.18	754.928	381.853	629.648	439.282	212.327	871.415	961.411	1070.94	841.895	940.231	846.249	225.452	481.527	476.405
RGMC.10008	d__Bacteria;p__Bacteroidota;c__Bacteroidia;o__Bacteroidales;f__Bacteroidaceae;g__UBA1786;s__UBA1786 sp024682395	421.769	188.717	124.397	167.158	195.139	190.012	592.933	239.63	334.98	423.56	196.541	263.822	343.03	403.806	322.114	331.521	242.541	243.631
RGMC.10019	d__Bacteria;p__Bacteroidota;c__Bacteroidia;o__Bacteroidales;f__Bacteroidaceae;g__Ga6A1;s__Ga6A1 sp900102385	221.673	0	0	0	0	0	248.131	0	232.497	0	0	0	0	0	0	220.017	0	0
RGMC.10041	d__Bacteria;p__Bacillota_A;c__Clostridia;o__Oscillospirales;f__UMGS1384;g__CALWJF01;s__	872.297	802.944	360.46	1034.56	992.197	961.437	827.536	857.751	600.124	967.341	1025.04	1158.03	875.936	824.061	923.304	824.035	931.143	914.128
RGMC.1019	d__Bacteria;p__Bacillota_A;c__Clostridia;o__Christensenellales;f__Aristaeellaceae;g__UBA2862;s__UBA2862 sp900318045	0	573.614	949.888	0	0	0	0	0	0	0	0	0	0	0	0	0	0	0
RGMC.1027	d__Bacteria;p__Synergistota;c__Synergistia;o__Synergistales;f__Aminobacteriaceae;g__JAFUYV01;s__JAFUYV01 sp016280565	1179.24	754.92	837.048	616.187	564.095	603.484	659.471	612.288	870.098	971.451	594.512	602.449	578.07	581.781	528.817	954.565	760.701	754.561
RGMC.1030	d__Bacteria;p__Bacteroidota;c__Bacteroidia;o__Bacteroidales;f__UBA932;g__Cryptobacteroides;s__Cryptobacteroides sp900318015	475.821	308.9	298.561	330.539	340.29	301.46	314.536	301.056	320.711	624.171	493.126	503.305	452.327	456.689	451.929	409.978	357.921	348.515
RGMC.1041	d__Bacteria;p__Bacillota_A;c__Clostridia;o__Peptostreptococcales;f__Anaerovoracaceae;g__Eubacterium_T;s__Eubacterium_T sp900318155	0	317.214	0	286.813	342.249	323.362	375.153	397.326	0	0	351.989	725.279	698.882	415.805	478.478	231.308	624.452	618.521
RGMC.10446	d__Bacteria;p__Bacillota_A;c__Clostridia;o__Lachnospirales;f__Lachnospiraceae;g__CAG-791;s__CAG-791 sp030525515	0	0	2236.73	0	0	0	0	0	0	0	0	0	0	0	0	0	0	0
RGMC.10449	d__Bacteria;p__Bacillota_A;c__Clostridia;o__Lachnospirales;f__Lachnospiraceae;g__UBA2912;s__UBA2912 sp902796775	496.146	1559.39	370.299	2513.44	2507.72	2556.7	1881.65	2277.13	758.384	3048.03	3084.49	3755.9	2410.14	2731.77	2914.53	1262.79	2807.08	2752.15
RGMC.10451	d__Bacteria;p__Bacillota_A;c__Clostridia;o__Christensenellales;f__Aristaeellaceae;g__UBA2862;s__UBA2862 sp017432405	0	646.014	898.189	0	0	0	0	294.046	0	0	0	0	0	0	0	0	0	0
RGMC.10459	d__Bacteria;p__Bacillota_A;c__Clostridia;o__Peptostreptococcales;f__Anaerovoracaceae;g__RUG099;s__RUG099 sp015058065	0	0	0	0	0	0	0	0	0	476.771	342.274	416.764	262.547	281.688	285.456	0	290.477	285.131
RGMC.10472	d__Bacteria;p__Bacillota_A;c__Clostridia;o__Peptostreptococcales;f__Anaerovoracaceae;g__UBA3738;s__UBA3738 sp946410475	0	0	277.764	0	0	0	0	0	0	0	0	0	0	0	0	0	0	0
RGMC.10477	d__Bacteria;p__Bacillota_A;c__Clostridia;o__Peptostreptococcales;f__Anaerovoracaceae;g__RGIG5755;s__	0	0	401.632	0	0	0	0	304.96	0	0	0	0	0	0	0	0	0	0
RGMC.10482	d__Bacteria;p__Bacillota_A;c__Clostridia;o__Peptostreptococcales;f__Anaerovoracaceae;g__Lentihominibacter;s__Lentihominibacter sp017431395	0	226.72	200.817	219.789	0	224.006	178.533	247.767	0	0	343.521	0	279.313	0	0	0	302.196	295.044
RGMC.10483	d__Bacteria;p__Bacillota_A;c__Clostridia;o__Peptostreptococcales;f__Anaerovoracaceae;g__Hornefia;s__	0	0	0	0	185.033	0	147.933	0	0	325.993	318.571	364.071	283.514	271.393	289.245	0	203.105	202.749
RGMC.10484	d__Bacteria;p__Bacillota_A;c__Clostridia;o__Lachnospirales;f__Lachnospiraceae;g__Porcincola;s__Porcincola sp902781455	0	0	488.838	542.596	557.419	440.519	492.289	573.458	0	439.865	802.919	923.217	846.933	800.294	826.902	0	751.948	735.201
RGMC.10494	d__Bacteria;p__Bacillota_A;c__Clostridia;o__Peptostreptococcales;f__Anaerovoracaceae;g__Lentihominibacter;s__Lentihominibacter sp017404365	0	279.672	257.818	316.202	367.62	362.646	364.989	460.776	0	513.199	555.739	578.068	538.16	613.244	497.462	0	424.864	424.177
RGMC.10509	d__Bacteria;p__Bacillota_A;c__Clostridia;o__Peptostreptococcales;f__Anaerovoracaceae;g__Lentihominibacter;s__	0	0	0	0	0	219.206	0	211.546	0	513.94	392.242	449.726	307.313	315.378	342.294	0	306.591	309.342
RGMC.10515	d__Bacteria;p__Bacillota_A;c__Clostridia;o__Peptostreptococcales;f__Anaerovoracaceae;g__RUG754;s__RUG754 sp902778565	160.44	500.978	783.809	455.348	459.46	593.918	442.647	705.153	193.933	762.235	740.851	714.253	712.25	751.227	637.069	267.098	544.433	545.26
RGMC.10525	d__Bacteria;p__Bacillota_A;c__Clostridia;o__Eubacteriales;f__Eubacteriaceae;g__Eubacterium;s__Eubacterium maltosivorans	0	0	828.78	0	0	0	0	0	0	0	0	0	0	0	0	0	0	0
RGMC.10537	d__Bacteria;p__Bacillota_A;c__Clostridia;o__Peptostreptococcales;f__Anaerovoracaceae;g__RUG099;s__	0	0	0	275.973	209.97	302.118	198.009	231.159	0	217.845	237.52	233.731	255.47	238.632	229.653	0	358.93	348.108
RGMC.10548	d__Bacteria;p__Bacillota_A;c__Clostridia;o__Oscillospirales;f__Oscillospiraceae;g__Faecousia;s__	0	0	0	1011.67	2283.35	294.898	1962.47	154.176	0	1110.73	1554.2	1647.97	1848.66	1884.48	1390.81	384.428	1805.03	1790.33
RGMC.10551	d__Bacteria;p__Bacillota_I;c__Bacilli_A;o__Erysipelotrichales;f__Erysipelotrichaceae;g__UBA636;s__	0	87.5722	0	0	0	0	0	0	110.5	0	0	0	0	0	0	0	0	0
RGMC.1063	d__Bacteria;p__Bacteroidota;c__Bacteroidia;o__Bacteroidales;f__Bacteroidaceae;g__UBA6382;s__UBA6382 sp900318305	0	0	0	0	0	0	0	0	103.397	0	0	0	0	0	0	0	0	0
RGMC.10650	d__Bacteria;p__Bacillota_A;c__Clostridia;o__Peptostreptococcales;f__Peptostreptococcaceae;g__Peptostreptococcus;s__	0	0	1275.28	0	0	0	0	0	0	0	0	0	0	0	0	0	0	0
RGMC.10685	d__Bacteria;p__Bacteroidota;c__Bacteroidia;o__Bacteroidales;f__WCHB1-69;g__UBA1756;s__	0	0	0	0	0	0	0	0	0	0	0	0	0	0	110.128	0	0	0
RGMC.10690	d__Bacteria;p__Bacteroidota;c__Bacteroidia;o__Bacteroidales;f__UBA932;g__RUG11257;s__RUG11257 sp017527625	779.897	495.09	571.561	376.204	260.616	398.377	367.592	444.524	786.718	197.625	159.441	0	188.684	190.9	189.646	560.59	270.931	270.098
RGMC.10694	d__Bacteria;p__Bacillota_A;c__Clostridia;o__Lachnospirales;f__Lachnospiraceae;g__NK4A136;s__NK4A136 sp017437785	0	412.088	290.516	534.726	681.831	451.438	519.883	422.306	0	619.068	388.333	501.781	0	364.836	386.555	428.498	551.792	546.767
RGMC.10696	d__Bacteria;p__Bacteroidota;c__Bacteroidia;o__Bacteroidales;f__Bacteroidaceae;g__UBA1179;s__UBA1179 sp902782245	516.234	333.517	495.875	238.817	199.869	288.777	294.126	297.462	625.768	184.415	0	0	190.507	208.386	168.83	420.611	194.997	197.665
RGMC.107	d__Bacteria;p__Spirochaetota;c__Spirochaetia;o__Treponematales;f__Treponemataceae;g__Treponema_D;s__Treponema_D sp002309195	0	0	0	0	0	0	0	0	0	0	0	0	0	0	86.8936	0	0	0
RGMC.10714	d__Bacteria;p__Bacillota_I;c__Bacilli_A;o__ML615J-28;f__CAG-698;g__Tener-01;s__Tener-01 sp001604495	0	0	0	0	166.359	0	223.258	114.72	108.393	363.662	160.789	179.567	316.259	359.377	248.828	123.229	121.481	119.568
RGMC.10716	d__Bacteria;p__Bacillota_A;c__Clostridia;o__Lachnospirales;f__Lachnospiraceae;g__Butyrivibrio;s__Butyrivibrio sp017445665	3573.55	0	0	0	0	0	0	0	0	0	0	0	0	0	0	0	0	0
RGMC.10727	d__Bacteria;p__Bacillota_A;c__Clostridia;o__Christensenellales;f__Aristaeellaceae;g__Firm-10;s__	0	0	0	209.27	255.308	183.101	212.291	166.816	0	592.89	422.174	425.19	333.379	322.298	319.496	0	246.592	244.393
RGMC.10741	d__Bacteria;p__Bacillota_A;c__Clostridia;o__Lachnospirales;f__Lachnospiraceae;g__SIG280;s__	3150.22	2676.24	51724.1	2072.27	1891.26	2071.38	2056.21	1523.69	3331.4	756.077	583.996	1073.37	1005.09	716.31	1053.01	2538.16	1808.59	1787.29
RGMC.10743	d__Bacteria;p__Synergistota;c__Synergistia;o__Synergistales;f__Synergistaceae;g__Synergistes;s__Synergistes sp016288355	0	0	0	0	0	0	0	0	0	405.729	194.466	0	219.726	0	156.417	0	0	0
RGMC.10759	d__Bacteria;p__Bacillota_A;c__Clostridia;o__Oscillospirales;f__Ruminococcaceae;g__Ruminococcus;s__	0	0	0	257.233	480.102	0	339.282	0	0	2750.95	1572.29	1459.35	1164.65	1314.79	1252.42	0	307.685	309.909
RGMC.10770	d__Bacteria;p__Bacillota_I;c__Bacilli_A;o__Erysipelotrichales;f__Erysipelotrichaceae;g__UBA636;s__	0	402.739	333.783	577.871	478.181	467.219	339.536	285.485	0	896.628	640.267	731.758	459.483	317.318	610.584	0	510.089	507.808
RGMC.10771	d__Bacteria;p__Desulfobacterota;c__Desulfovibrionia;o__Desulfovibrionales;f__Desulfovibrionaceae;g__Desulfovibrio;s__Desulfovibrio desulfuricans_D	1564.38	703.55	0	811.312	696.897	727.405	772.988	674.125	1019.79	0	680.472	0	612.144	544.462	576.887	950.576	648.767	636.729
RGMC.10775	d__Bacteria;p__Bacillota_A;c__Clostridia;o__Lachnospirales;f__Lachnospiraceae;g__RUG11977;s__RUG11977 sp016285135	0	0	0	0	0	0	0	0	0	168.278	0	0	0	0	0	0	0	0
RGMC.10779	d__Bacteria;p__Bacteroidota;c__Bacteroidia;o__Bacteroidales;f__Bacteroidaceae;g__UBA4372;s__UBA4372 sp017427185	273.454	136.292	0	185.036	0	152.431	173.941	160.567	234.254	0	0	0	0	0	0	300.342	151.465	149.485
RGMC.10780	d__Bacteria;p__Bacteroidota;c__Bacteroidia;o__Bacteroidales;f__Bacteroidaceae;g__UBA4372;s__UBA4372 sp902768605	130.037	0	0	0	0	0	0	0	0	0	0	0	0	0	0	0	0	0
RGMC.10786	d__Bacteria;p__Bacteroidota;c__Bacteroidia;o__Bacteroidales;f__UBA1402;g__UBA1757;s__UBA1757 sp017446025	108.949	75.4946	99.2736	0	0	0	0	0	111.827	0	0	0	0	0	0	0	0	0
RGMC.10789	d__Bacteria;p__Bacillota_A;c__Clostridia;o__Lachnospirales;f__Lachnospiraceae;g__AC2028;s__AC2028 sp000702685	851.094	1320.82	1546.85	704.415	644.273	818.775	565.553	770.462	767.388	422.188	267.738	277.879	195.525	197.283	271.517	637.519	548.412	528.499
RGMC.10794	d__Bacteria;p__Bacteroidota;c__Bacteroidia;o__Bacteroidales;f__Bacteroidaceae;g__Prevotella;s__	275.076	151.212	0	181.57	186.718	166.751	248.427	165.69	292.901	0	0	0	127.349	0	110.82	293.653	127.207	130.992
RGMC.10795	d__Bacteria;p__Bacteroidota;c__Bacteroidia;o__Bacteroidales;f__P3;g__UBA1217;s__UBA1217 sp902788805	220.284	0	0	0	0	0	0	0	235.464	0	0	0	0	0	0	0	0	0
RGMC.10804	d__Bacteria;p__Bacillota_A;c__Clostridia;o__Lachnospirales;f__Lachnospiraceae;g__UBA1712;s__UBA1712 sp017540355	847.161	597.501	455.162	511.305	319.971	462.129	331.04	381.781	743.083	0	0	0	0	0	0	796.966	303.007	296.818
RGMC.10806	d__Bacteria;p__Bacillota_I;c__Bacilli_A;o__RFN20;f__CAG-826;g__RUG13091;s__	0	0	0	0	0	0	358.016	0	0	0	0	0	0	0	321.374	0	0	0
RGMC.10813	d__Bacteria;p__Bacillota_I;c__Bacilli_A;o__Erysipelotrichales;f__Erysipelotrichaceae;g__RUG521;s__RUG521 sp017516045	0	0	119.886	0	0	0	0	0	0	0	0	0	0	0	0	0	0	0
RGMC.10818	d__Bacteria;p__Bacillota_A;c__Clostridia;o__Oscillospirales;f__Acutalibacteraceae;g__RUG806;s__	0	0	0	0	0	0	0	0	0	254.457	0	0	0	0	0	0	0	0
RGMC.10824	d__Bacteria;p__Desulfobacterota;c__Desulfovibrionia;o__Desulfovibrionales;f__Desulfovibrionaceae;g__Desulfovibrio;s__Desulfovibrio sp002369295	677.359	589.208	0	551.197	505.213	536.705	592.079	591.384	448.357	739.231	553.961	472.05	431.593	467.58	464.093	582.59	502.646	496.49
RGMC.10826	d__Bacteria;p__Spirochaetota;c__Spirochaetia;o__Sphaerochaetales;f__Sphaerochaetaceae;g__UBA9732;s__UBA9732 sp902796335	394.073	223.845	174.728	789.86	783.687	522.03	1524.6	482.43	852.72	769.712	519.431	563.55	949.863	839.672	831.055	958.214	707.634	709.045
RGMC.10835	d__Bacteria;p__Bacteroidota;c__Bacteroidia;o__Bacteroidales;f__UBA932;g__Cryptobacteroides;s__Cryptobacteroides sp900316525	203.222	136.342	145.731	0	0	0	0	0	0	0	0	0	0	0	0	0	0	0
RGMC.10839	d__Bacteria;p__Bacteroidota;c__Bacteroidia;o__Bacteroidales;f__F082;g__Limimorpha;s__Limimorpha sp902774295	4400.25	1735.78	446.828	3937.39	2529.85	4325.76	5384.36	6110.7	7332.63	1098.82	521.935	684.458	1325.14	1461.38	1030.69	5811.26	2736.64	2735.85
RGMC.10841	d__Archaea;p__Methanobacteriota;c__Methanobacteria;o__Methanobacteriales;f__Methanobacteriaceae;g__Methanobrevibacter_A;s__Methanobrevibacter_A sp017434525	1217.35	2530.18	141.849	2514.34	1886.47	3200.1	2010.01	3436.38	1195.62	766.063	943.113	872.777	1042.64	1251.42	950.656	1407.68	2855.04	2813.25
RGMC.10846	d__Bacteria;p__Bacillota_A;c__Clostridia;o__Lachnospirales;f__Lachnospiraceae;g__UBA2868;s__UBA2868 sp900320345	0	0	763.72	0	0	0	0	0	0	0	0	0	0	0	0	0	0	0
RGMC.10848	d__Bacteria;p__Bacteroidota;c__Bacteroidia;o__Bacteroidales;f__F082;g__Limimorpha;s__Limimorpha sp902801465	0	0	0	184.384	0	127.374	174.159	0	0	0	0	0	0	0	0	238.238	160.432	159.171
RGMC.10877	d__Bacteria;p__Bacteroidota;c__Bacteroidia;o__Bacteroidales;f__UBA932;g__Cryptobacteroides;s__Cryptobacteroides sp946406095	576.666	404.636	496.83	368.885	265.814	390.262	335.966	366.937	580.891	0	186.83	0	246.221	233.461	236.871	499.918	314.637	312.902
RGMC.10885	d__Bacteria;p__Bacillota_A;c__Clostridia;o__Peptostreptococcales;f__Anaerovoracaceae;g__UBA3871;s__UBA3871 sp002392265	552.574	357.087	175.717	516.224	546.274	484.063	778.111	528.162	567.429	791.021	432.472	533.181	661.1	702.277	510.738	655.165	693.96	686.324
RGMC.10895	d__Bacteria;p__Bacillota_A;c__Clostridia;o__Lachnospirales;f__Lachnospiraceae;g__Bilifractor;s__Bilifractor sp000702845	0	6504.58	4632.43	8526.41	11843.5	9663.94	8186.45	8456.77	0	17859.9	14140.4	15350.7	12422.2	11793.4	12144.8	0	10328.7	10059.2
RGMC.10913	d__Bacteria;p__Bacteroidota;c__Bacteroidia;o__Bacteroidales;f__UBA932;g__Bact-11;s__	403.528	245.326	296.863	233.895	208.584	214.756	250.029	232.532	0	328.47	265.792	264.8	274.16	283.964	235.988	0	234.805	229.534
RGMC.10915	d__Bacteria;p__Bacteroidota;c__Bacteroidia;o__Bacteroidales;f__BM520;g__RGIG7150;s__RGIG7150 sp016285515	0	0	0	153.755	260.062	0	419.79	0	0	474.053	306.138	303.67	402.909	512.546	303.685	173.514	204.587	210.201
RGMC.10917	d__Bacteria;p__Bacillota_A;c__Clostridia;o__Oscillospirales;f__CAG-272;g__UMGS1696;s__UMGS1696 sp902782445	0	141.643	173.469	0	0	121.142	0	127.127	0	153.224	142.8	136.485	127.563	131.743	107.346	0	136.515	134.756
RGMC.10918	d__Bacteria;p__Bacillota_A;c__Clostridia;o__Lachnospirales;f__Lachnospiraceae;g__Pseudobutyrivibrio;s__	0	2849.34	4248.32	1964.59	1389.78	1605.1	836.904	872.808	0	0	1492.4	0	0	0	0	0	1285.91	1260.74
RGMC.10921	d__Bacteria;p__Bacteroidota;c__Bacteroidia;o__Bacteroidales;f__Bacteroidaceae;g__Prevotella;s__Prevotella sp017447515	308.466	196.717	183.239	0	0	0	0	169.15	289.667	0	0	0	0	0	0	220.739	0	0
RGMC.10927	d__Bacteria;p__Bacillota_A;c__Clostridia;o__Lachnospirales;f__Lachnospiraceae;g__UBA2868;s__UBA2868 sp017526745	521.026	953.538	1055.59	1105.57	1305.2	812.835	929.196	534.428	464.834	1567.19	1095.09	1545.65	787.753	608.42	1110.42	611.725	1128.42	1104.41
RGMC.10943	d__Bacteria;p__Bacteroidota;c__Bacteroidia;o__Bacteroidales;f__UBA932;g__Bact-11;s__Bact-11 sp017447265	3584.14	2271.76	2590.11	2284.24	1933.24	2155.09	2521.36	2246.45	3280.52	1483.99	1309.58	1179.11	1445.66	1382.57	1286.05	2851.55	1884.56	1887.16
RGMC.10950	d__Bacteria;p__Bacillota_C;c__Negativicutes;o__Acidaminococcales;f__Acidaminococcaceae;g__Succiniclasticum;s__Succiniclasticum sp017443005	0	136.754	173.764	0	0	0	0	0	0	0	0	0	0	0	0	0	0	0
RGMC.10958	d__Bacteria;p__Bacillota_A;c__Clostridia;o__Christensenellales;f__Aristaeellaceae;g__Aristaeella;s__	0	0	0	0	0	0	0	468.911	0	1053.4	992.17	1189.15	640.88	608.169	787.745	0	0	0
RGMC.1096	d__Bacteria;p__Spirochaetota;c__Spirochaetia;o__Sphaerochaetales;f__Sphaerochaetaceae;g__UBA9732;s__UBA9732 sp902796335	221.656	122.722	0	464.593	476.617	300.215	863.907	273.656	469.251	404.502	294.958	345.923	559.858	484.943	489.378	556.476	409.976	402.571
RGMC.10960	d__Bacteria;p__Bacillota_A;c__Clostridia;o__Peptostreptococcales;f__Anaerovoracaceae;g__Lentihominibacter;s__	808.206	1926.83	2145.98	2511.79	3020.56	2635.51	3023.35	3048.82	913.388	4159.97	3668.44	3816.3	3462.35	4070.67	3234.28	1510.09	3604.47	3551.15
RGMC.10963	d__Bacteria;p__Bacillota_C;c__Negativicutes;o__Acidaminococcales;f__Acidaminococcaceae;g__Succiniclasticum;s__	0	0	0	0	0	0	0	0	0	251.191	179.871	0	0	0	0	0	0	0
RGMC.10965	d__Bacteria;p__Bacillota_A;c__Clostridia;o__Lachnospirales;f__Lachnospiraceae;g__Avilachnospira;s__	0	260.147	0	0	0	270.815	0	277.054	0	0	0	0	0	0	300.788	0	313.112	301.792
RGMC.10967	d__Bacteria;p__Bacillota_A;c__Clostridia;o__Christensenellales;f__Aristaeellaceae;g__UBA2943;s__UBA2943 sp900321295	0	0	0	0	208.099	155.788	192.362	155.403	0	398.092	329.974	358.172	275.082	301.813	284.215	0	190.018	183.416
RGMC.10975	d__Bacteria;p__Desulfobacterota;c__Desulfobulbia;o__Desulfobulbales;f__Desulfobulbaceae;g__Desulfobulbus;s__	0	0	281.77	0	0	0	0	0	0	0	0	0	0	0	0	0	0	0
RGMC.10977	d__Bacteria;p__Spirochaetota;c__Spirochaetia;o__Treponematales;f__Treponemataceae;g__Treponema_D;s__	665.208	440.21	455.982	495.538	488.457	601.489	608.588	582.99	851.601	0	0	0	0	0	0	765.907	343.414	346.589
RGMC.10978	d__Bacteria;p__Bacillota_A;c__Clostridia;o__Lachnospirales;f__Lachnospiraceae;g__CAG-791;s__CAG-791 sp002449595	0	0	0	0	0	0	0	313.418	0	0	0	0	0	0	0	0	0	0
RGMC.10990	d__Bacteria;p__Bacillota_A;c__Clostridia;o__Lachnospirales;f__Lachnospiraceae;g__Porcincola;s__	0	0	0	0	952.864	0	522.714	0	0	2012.4	1398.09	1808.95	1177.99	999.44	1549.63	0	918.694	911.053
RGMC.11013	d__Bacteria;p__Bacillota_A;c__Clostridia;o__Oscillospirales;f__Oscillospiraceae;g__Limivicinus;s__Limivicinus sp902799075	0	142.743	0	0	0	0	0	0	0	0	0	0	0	0	0	0	0	0
RGMC.11026	d__Bacteria;p__Bacillota_A;c__Clostridia;o__Saccharofermentanales;f__Saccharofermentanaceae;g__Saccharofermentans;s__Saccharofermentans sp024695505	0	246.764	0	0	0	0	0	0	0	0	0	0	0	0	0	0	0	0
RGMC.11033	d__Bacteria;p__Bacillota_A;c__Clostridia;o__Christensenellales;f__Christensenellaceae;g__QANA01;s__QANA01 sp017439085	649.574	494.22	221.474	458.231	503.991	474.7	661.374	661.533	580.652	416.956	453.061	503.754	540.315	573.58	484.159	573.975	507.721	502.952
RGMC.11054	d__Bacteria;p__Spirochaetota;c__Spirochaetia;o__Treponematales;f__Treponemataceae;g__Treponema_D;s__Treponema_D bryantii_B	761.052	499.68	504.934	552.968	536.099	672.231	712.725	718.605	982.462	0	159.298	182.076	327.179	415.724	312.827	871.589	390.086	385.356
RGMC.11058	d__Bacteria;p__Bacillota_A;c__Clostridia;o__Oscillospirales;f__Oscillospiraceae;g__Limivicinus;s__Limivicinus sp902778285	464.12	633.512	494.739	818.034	679.607	643.173	481.965	414.835	316.612	798.382	996.809	1045.83	591.104	505.373	809.87	662.207	944.538	932.042
RGMC.11066	d__Bacteria;p__Bacillota_A;c__Clostridia;o__Peptostreptococcales;f__Anaerovoracaceae;g__RUG14258;s__RUG14258 sp017515705	0	268.079	235.009	186.502	0	298.434	234.03	427.926	0	0	0	0	0	0	0	0	342.058	342.258
RGMC.11067	d__Bacteria;p__Spirochaetota;c__Spirochaetia;o__Treponematales;f__Treponemataceae;g__Treponema_D;s__Treponema_D sp004554075	2718.03	1846.4	1827.2	1914.71	1714.84	2318.44	2090.74	2573	3654.11	495.56	499.805	460.646	967.854	1518.2	897.443	3085.46	1328.5	1320.9
RGMC.11072	d__Bacteria;p__Bacillota_A;c__Clostridia;o__Peptostreptococcales;f__Anaerovoracaceae;g__Eubacterium_B;s__Eubacterium_B sp017437565	0	167.06	208.417	166.962	163.539	186.729	150.232	187.722	0	262.508	224.185	231.926	182.275	184.942	173.921	0	222.521	228.558
RGMC.11082	d__Bacteria;p__Pseudomonadota;c__Gammaproteobacteria;o__Enterobacterales;f__Succinivibrionaceae;g__Ruminobacter;s__Ruminobacter sp002309455	0	0	405.66	277.46	0	0	0	0	575.249	0	0	0	0	0	0	0	0	0
RGMC.11094	d__Bacteria;p__Synergistota;c__Synergistia;o__Synergistales;f__Aminobacteriaceae;g__JAFUYV01;s__JAFUYV01 sp016280565	1408.86	933.109	1044.59	782.562	706.187	774.041	849.915	859.998	998.361	1126.54	735.88	734.188	723.264	769.815	648.143	1137.55	903.935	886.182
RGMC.11100	d__Bacteria;p__Bacillota_A;c__Clostridia;o__Lachnospirales;f__Lachnospiraceae;g__CAG-791;s__	0	627.015	0	0	0	893.782	0	886.045	0	0	684.902	0	0	0	825.743	0	768.324	755.937
RGMC.11114	d__Bacteria;p__Bacillota_A;c__Clostridia;o__Oscillospirales;f__Oscillospiraceae;g__Limivicinus;s__	637.509	1123.73	865.398	1290.34	1218.17	1096.24	1032.9	976.854	530.712	1080.31	1663.27	1661.14	1216.17	1318.69	1212.61	865.135	1176.03	1157.8
RGMC.11127	d__Bacteria;p__Bacillota_A;c__Clostridia;o__Christensenellales;f__Aristaeellaceae;g__UBA2943;s__	0	164.009	186.567	0	0	0	0	0	0	0	0	0	0	0	0	0	0	0
RGMC.11130	d__Bacteria;p__Bacillota_A;c__Clostridia;o__Christensenellales;f__Aristaeellaceae;g__UBA2862;s__	0	2176.95	1852.71	2131.69	1716.58	1655.05	946.675	937.619	0	3659.34	3319.06	4418.45	2186.85	1465.35	2843.7	0	1725.94	1696.67
RGMC.11157	d__Bacteria;p__Bacillota_I;c__Bacilli_A;o__Erysipelotrichales;f__Erysipelotrichaceae;g__Bulleidia;s__	0	1074.78	1560.64	831.662	780.41	754.134	632.924	731.819	0	0	724.435	804.521	579.191	504.301	610.384	0	781.898	751.569
RGMC.11325	d__Bacteria;p__Spirochaetota;c__Spirochaetia;o__Treponematales;f__Treponemataceae;g__Treponema_D;s__	0	0	0	0	0	0	0	0	0	0	143.29	0	0	0	0	0	0	0
RGMC.11436	d__Bacteria;p__Bacillota_A;c__Clostridia;o__Lachnospirales;f__Lachnospiraceae;g__UBA1258;s__UBA1258 sp017963665	6062.58	4984.55	4654.12	4184.02	2361.89	4568.15	2625.63	4028.01	6012.46	554.223	395.846	428.513	520.354	500.688	611.16	5181.55	2362.28	2347.21
RGMC.11438	d__Bacteria;p__Pseudomonadota;c__Alphaproteobacteria;o__UBA3830;f__UBA3830;g__UBA3830;s__UBA3830 sp017416635	2808.21	988.928	686.084	1422.73	1863.77	1554.51	1756.43	1117.84	2884.77	0	734.598	481.12	751.855	517.14	754.372	1977.72	996.72	983.452
RGMC.11452	d__Bacteria;p__Planctomycetota;c__Planctomycetia;o__Pirellulales;f__Thermoguttaceae;g__RUG369;s__	473.903	239.297	175.693	325.921	0	320.034	222.67	296.682	332.514	358.133	191.341	204.567	201.086	196.013	169.703	463.064	290.371	279.924
RGMC.1162	d__Bacteria;p__Bacillota_A;c__Clostridia;o__Lachnospirales;f__Lachnospiraceae;g__CAG-791;s__	0	0	310.16	0	0	0	0	0	0	0	0	0	0	0	0	0	0	0
RGMC.11656	d__Bacteria;p__Bacillota_A;c__Clostridia;o__Oscillospirales;f__Ruminococcaceae;g__RGIG1955;s__RGIG1955 sp017414435	752.735	0	0	730.402	930.339	585.543	925.103	497.7	521.426	1249.76	1029.14	1231.33	1264.51	1167.11	1093.33	944.404	1147.84	1148.58
RGMC.11784	d__Archaea;p__Methanobacteriota;c__Methanobacteria;o__Methanobacteriales;f__Methanobacteriaceae;g__Methanobrevibacter_A;s__Methanobrevibacter_A sp017409525	207.973	358.22	0	275.84	0	298.129	0	363.012	146.812	0	0	0	0	0	0	0	363.339	357.402
RGMC.11805	d__Bacteria;p__Bacteroidota;c__Bacteroidia;o__Bacteroidales;f__Paludibacteraceae;g__UBA1723;s__UBA1723 sp002371265	1013.95	666.967	539.27	763.524	724.22	838.276	923.201	951.558	1215.58	352.793	379.684	355.897	675.828	839.616	609.15	1218.03	632.852	627.756
RGMC.11860	d__Bacteria;p__Bacillota_A;c__Clostridia;o__Oscillospirales;f__Oscillospiraceae;g__Limivicinus;s__Limivicinus sp900317375	0	285.87	283.392	382.85	368.158	297.948	294.228	270.85	0	524.293	530.92	538.982	466.666	459.656	432.73	249.631	373.202	361.42
RGMC.11887	d__Archaea;p__Methanobacteriota;c__Methanobacteria;o__Methanobacteriales;f__Methanobacteriaceae;g__Methanobrevibacter_A;s__Methanobrevibacter_A sp017407115	0	139.328	0	0	0	173.948	0	177.749	0	0	0	0	0	0	0	0	0	0
RGMC.11889	d__Bacteria;p__Fibrobacterota;c__Fibrobacteria;o__Fibrobacterales;f__Fibrobacteraceae;g__Fibrobacter;s__Fibrobacter sp017965445	1242.74	785.37	767.419	623.66	514.867	745.778	489.05	677.66	1189.19	0	0	0	326.082	321.942	308.668	1054.24	0	453.27
RGMC.11898	d__Bacteria;p__Bacillota_A;c__Clostridia;o__Peptostreptococcales;f__Anaerovoracaceae;g__RGIG7111;s__	0	0	0	0	0	0	0	0	0	805.948	534.668	582.777	428.553	433.257	461.318	0	0	0
RGMC.119	d__Bacteria;p__Bacteroidota;c__Bacteroidia;o__Bacteroidales;f__UBA932;g__Cryptobacteroides;s__Cryptobacteroides sp900320365	213.467	0	0	0	0	0	0	0	0	0	0	0	0	0	0	0	0	0
RGMC.11904	d__Bacteria;p__Bacillota_I;c__Bacilli_A;o__Erysipelotrichales;f__Erysipelotrichaceae;g__RUG521;s__RUG521 sp900319675	0	0	131.135	0	0	0	0	118.434	0	0	0	0	0	0	0	0	0	0
RGMC.11924	d__Bacteria;p__Bacillota_C;c__Negativicutes;o__Acidaminococcales;f__Acidaminococcaceae;g__Succiniclasticum;s__Succiniclasticum sp017405945	777.118	438.78	360.578	571.733	619.638	462.045	547.755	423.659	538.794	937.379	659.298	782.565	636.063	595.064	598.844	590.247	613.848	615.409
RGMC.11928	d__Bacteria;p__Bacillota_A;c__Clostridia;o__Peptostreptococcales;f__Anaerovoracaceae;g__RUG099;s__RUG099 sp017405845	1600.91	4702.51	4567.92	4859.68	4917.19	4951.96	3461.57	4385.4	1923.97	10649.9	8327.35	10832.8	6875.41	6906.7	8481.06	2713.26	6073.47	5977.68
RGMC.11929	d__Bacteria;p__Bacillota_I;c__Bacilli_A;o__Erysipelotrichales;f__Erysipelotrichaceae;g__RUG521;s__RUG521 sp017405785	106.815	251.118	362.739	335.568	343.742	391.91	295.116	411.36	134.179	360.129	414.541	447.073	410.1	441.082	423.097	187.339	365.498	356.989
RGMC.11935	d__Bacteria;p__Bacillota_A;c__Clostridia;o__Peptostreptococcales;f__Anaerovoracaceae;g__RUG14258;s__RUG14258 sp017405645	240.714	622.615	544.16	642.929	598.841	827.39	776.248	862.799	207.365	450.988	304.043	308.562	360.075	308.61	234.187	478.11	1271.74	1252.37
RGMC.11941	d__Bacteria;p__Bacillota_A;c__Clostridia;o__Oscillospirales;f__Ruminococcaceae;g__RUG11783;s__RUG11783 sp017405465	141.115	249.346	331.107	170.776	150.724	223.384	174.895	262.956	130.781	172.875	153.967	152.112	145.383	157.218	134.13	147.437	186.814	185.062
RGMC.11943	d__Bacteria;p__Spirochaetota;c__Spirochaetia;o__Sphaerochaetales;f__Sphaerochaetaceae;g__UBA9732;s__UBA9732 sp902781545	0	0	0	0	0	0	289.916	0	227.419	0	0	0	223.349	0	218.397	0	0	0
RGMC.11960	d__Bacteria;p__Bacillota_A;c__Clostridia;o__Christensenellales;f__Aristaeellaceae;g__Aristaeella;s__Aristaeella sp017404985	0	187.839	198.676	0	0	0	0	0	0	0	0	0	0	0	0	0	0	0
RGMC.11978	d__Bacteria;p__Bacillota_I;c__Bacilli_A;o__Erysipelotrichales;f__Erysipelotrichaceae;g__Bulleidia;s__Bulleidia sp017404505	345.607	1288.98	985.607	1126.07	1072.54	1381.97	758.298	1079.02	543.679	1130.16	1525.99	1639.59	1114.54	1076.45	1486.11	630.363	1188.68	1153.74
RGMC.11983	d__Bacteria;p__Bacillota_A;c__Clostridia;o__Peptostreptococcales;f__Anaerovoracaceae;g__Lentihominibacter;s__Lentihominibacter sp017404365	0	298.713	249.494	332.532	371.809	376.629	362.676	469.285	0	591.676	593.662	626.218	549.46	617.357	534.8	0	458.261	451.932
RGMC.11994	d__Archaea;p__Methanobacteriota;c__Methanobacteria;o__Methanobacteriales;f__Methanobacteriaceae;g__Methanobrevibacter;s__Methanobrevibacter sp017404125	0	0	0	0	0	1143.84	0	1234.14	0	0	0	0	0	0	0	0	0	0
RGMC.11999	d__Bacteria;p__Bacillota_B;c__Dehalobacteriia;o__UBA4068;f__UBA4068;g__CALXSV01;s__CALXSV01 sp947307285	0	0	0	0	139.483	0	0	0	0	660.296	575.99	513.581	565.696	545.118	442.247	0	88.6636	87.8853
RGMC.12	d__Bacteria;p__Verrucomicrobiota;c__Kiritimatiellia;o__RFP12;f__UBA1067;g__UBA1067;s__UBA1067 sp016284515	227.386	0	0	0	0	0	0	0	198.795	0	0	0	0	0	0	0	0	0
RGMC.12001	d__Bacteria;p__Bacillota_A;c__Clostridia;o__Oscillospirales;f__Oscillospiraceae;g__UBA738;s__UBA738 sp017411265	0	396.767	427.564	421.152	372.303	375.751	272.501	302.17	0	709.423	582.005	642.477	460.141	411.048	436.381	0	432.143	429.12
RGMC.12005	d__Bacteria;p__Bacillota_A;c__Clostridia;o__Christensenellales;f__Christensenellaceae;g__;s__	365.614	411.047	393.942	448.01	477.66	488.661	532.176	563.807	375.789	740.144	651.251	671.053	645.39	741.399	600.663	411.576	535.838	527.004
RGMC.12008	d__Bacteria;p__Bacillota_A;c__Clostridia;o__Oscillospirales;f__Oscillospiraceae;g__Limivicinus;s__Limivicinus sp017434755	0	203.453	194.004	215.137	0	224.509	0	211.005	0	323.581	288.951	297.176	217.096	239.592	241.626	0	246.203	245.658
RGMC.12011	d__Bacteria;p__Bacillota_B;c__Dehalobacteriia;o__UBA4068;f__UBA4068;g__CALXSV01;s__CALXSV01 sp947307285	0	0	0	0	100.484	0	0	0	0	486.808	396.331	362.503	391.625	388.853	310.433	0	0	0
RGMC.12012	d__Bacteria;p__Bacillota_A;c__Clostridia;o__Peptostreptococcales;f__Anaerovoracaceae;g__RUG099;s__RUG099 sp017434685	258.946	396.389	356.417	688.633	822.191	670.62	904.6	766.802	242.418	352.551	827.663	754.02	1126.88	1270.44	907.465	382.861	1025.03	1017.97
RGMC.12014	d__Bacteria;p__Bacillota_A;c__Clostridia;o__Lachnospirales;f__Lachnospiraceae;g__Anaerobutyricum;s__	1536.86	5891.69	6086.27	3651.07	3782.49	4788.45	2920.89	5321.32	1815.62	2887.95	4889.24	5557.43	4112.94	4191.17	4839.89	2605.41	4266.91	4169.57
RGMC.12022	d__Bacteria;p__Bacillota_A;c__Clostridia;o__Oscillospirales;f__Oscillospiraceae;g__Limivicinus;s__Limivicinus sp900317375	1207.73	2415.65	2375.02	2959.5	2945.98	2439.57	2410.54	2282.98	1138.31	3910.41	4135.24	4191.64	3174.21	3430.08	3128.77	1929.84	3288.53	3266.11
RGMC.12023	d__Archaea;p__Halobacteriota;c__Methanomicrobia;o__Methanomicrobiales;f__Methanomicrobiaceae;g__Methanomicrobium;s__Methanomicrobium mobile	3371.79	1381.31	1544.92	800.402	1049.38	633.584	1378.09	1884.34	3349.13	2523.73	789.505	1018.51	1270.4	1128.63	951.913	2297.7	1447.1	1430.21
RGMC.12034	d__Bacteria;p__Bacillota_A;c__Clostridia;o__Christensenellales;f__Aristaeellaceae;g__UBA2862;s__UBA2862 sp017434085	16868	34852.6	48683.7	26101.4	15112.7	18648.3	9513.21	10181.4	14564.7	4833.34	15557.4	17301	9666	6088.7	14176.3	17736.4	21136.1	20952.1
RGMC.12037	d__Bacteria;p__Bacillota_A;c__Clostridia;o__Peptostreptococcales;f__Anaerovoracaceae;g__RGIG2439;s__RGIG2439 sp017433975	0	274.318	658.679	219.284	177.55	296.06	160.542	304.664	0	226.633	219.02	225.666	187.26	190.954	187.451	0	229.622	230.702
RGMC.12042	d__Bacteria;p__Patescibacteria;c__Saccharimonadia;o__Saccharimonadales;f__Nanosyncoccaceae;g__Nanosyncoccus;s__	0	0	1093.53	0	0	0	0	0	0	0	0	0	0	0	0	0	0	0
RGMC.12045	d__Bacteria;p__Bacillota_A;c__Clostridia;o__Lachnospirales;f__Lachnospiraceae;g__Butyrivibrio;s__Butyrivibrio sp017433805	0	0	0	0	0	0	0	0	0	0	1205.61	0	0	0	0	0	0	0
RGMC.12048	d__Bacteria;p__Chloroflexota;c__Anaerolineae;o__Anaerolineales;f__Anaerolineaceae;g__Flexilinea;s__	150.636	376.453	318.698	457.337	527.851	456.234	399.355	382.597	180.444	916.56	875.22	918.578	656.008	686.852	698.154	241.144	463.887	470.129
RGMC.12063	d__Bacteria;p__Bacillota_I;c__Bacilli_A;o__Erysipelotrichales;f__Erysipelotrichaceae;g__Bulleidia;s__Bulleidia sp017433125	0	138.283	0	234.35	265.581	230.731	238.337	219.022	0	254.137	434.722	477.781	396.001	371.553	421.949	0	314.835	314.91
RGMC.12068	d__Bacteria;p__Bacillota_B;c__Dehalobacteriia;o__UBA4068;f__UBA4068;g__CALXSV01;s__CALXSV01 sp947307285	0	0	0	0	143.66	0	0	0	0	1332.75	948.048	977.058	837.714	816.893	735.184	0	0	0
RGMC.12070	d__Archaea;p__Methanobacteriota;c__Methanobacteria;o__Methanobacteriales;f__Methanobacteriaceae;g__Methanobrevibacter_A;s__Methanobrevibacter_A sp902789505	0	125.287	0	206.673	280.561	214.815	292.385	239.813	0	0	0	0	208.493	262.311	171.445	0	243.698	251.303
RGMC.12075	d__Bacteria;p__Bacillota_I;c__Bacilli_A;o__Erysipelotrichales;f__Erysipelotrichaceae;g__Bulleidia;s__Bulleidia sp017433125	0	160.127	114.397	266.505	302.809	263.138	293.709	248.776	0	348.665	548.16	617.362	484.247	462.67	523.789	153.371	378.483	377.815
RGMC.12080	d__Bacteria;p__Bacillota_A;c__Clostridia;o__Peptostreptococcales;f__Anaerovoracaceae;g__RUG13409;s__RUG13409 sp017432725	0	0	0	0	0	0	0	153.063	0	0	0	0	0	0	0	0	0	0
RGMC.12084	d__Bacteria;p__Bacillota_A;c__Clostridia;o__Oscillospirales;f__Oscillospiraceae;g__Limivicinus;s__Limivicinus sp017432615	0	511.692	0	0	0	481.875	0	387.078	0	0	0	0	0	0	0	0	0	0
RGMC.12095	d__Bacteria;p__Bacillota_A;c__Clostridia;o__Peptostreptococcales;f__Anaerovoracaceae;g__Lentihominibacter;s__Lentihominibacter sp017432345	0	183.778	183.338	219.738	275.25	250.292	236.111	286.335	0	441.506	426.443	433.124	386.649	419.058	381.699	0	284.194	271.419
RGMC.12096	d__Bacteria;p__UBP6;c__UBA1177;o__UBA1177;f__UBA1177;g__UBA1177;s__UBA1177 sp002309575	0	0	0	0	623.169	0	346.308	0	0	2311.47	1175.09	1385.23	2070.19	2304.85	1361.01	0	164.316	160.787
RGMC.12097	d__Bacteria;p__Bacillota_I;c__Bacilli_A;o__Erysipelotrichales;f__Erysipelotrichaceae;g__Bulleidia;s__Bulleidia sp017432325	0	287.145	299.898	0	0	261.78	0	282.413	0	0	348.75	0	303.494	286.967	301.803	0	230.298	229.812
RGMC.12101	d__Archaea;p__Methanobacteriota;c__Methanobacteria;o__Methanobacteriales;f__Methanobacteriaceae;g__Methanobrevibacter;s__Methanobrevibacter sp017432245	0	0	0	0	0	795.99	0	1031.09	0	0	0	0	0	0	0	0	0	0
RGMC.12105	d__Bacteria;p__Bacillota_A;c__Clostridia;o__Peptostreptococcales;f__Anaerovoracaceae;g__RUG099;s__RUG099 sp017432075	295.621	925.129	1136.04	816.882	715.009	961.157	659.062	1072.15	362.596	1038.23	1117.29	1269.67	1010.45	1101.95	1079.21	532.026	983.522	991.495
RGMC.12111	d__Bacteria;p__Bacillota_I;c__Bacilli_A;o__Erysipelotrichales;f__Erysipelotrichaceae;g__UBA636;s__UBA636 sp017432005	1351.34	983.213	897.103	1057.23	835.273	1055.09	925.278	864.564	1080.13	680.73	721.837	781.527	691.607	621.606	765.456	1111.28	970.385	961.029
RGMC.12128	d__Bacteria;p__Bacillota_A;c__Clostridia;o__Lachnospirales;f__Lachnospiraceae;g__RGIG5612;s__RGIG5612 sp017431485	0	683.084	0	0	0	1011.25	0	1176.8	0	0	0	0	0	0	0	0	1158.52	1130.23
RGMC.12132	d__Bacteria;p__Bacillota_A;c__Clostridia;o__Peptostreptococcales;f__Anaerovoracaceae;g__Lentihominibacter;s__Lentihominibacter sp017431395	0	164.869	0	174.26	0	178.826	0	181.38	0	0	0	0	0	0	0	0	207.736	212.794
RGMC.12136	d__Bacteria;p__Bacillota_A;c__Clostridia;o__Peptostreptococcales;f__Anaerovoracaceae;g__RUG099;s__RUG099 sp017431175	391.961	785.238	471.791	1227.01	807.811	1450.51	1088.01	1169.58	395.367	356.587	616.853	618.774	632.487	623.878	587.4	750.691	1166.19	1150.16
RGMC.12138	d__Bacteria;p__Bacillota_A;c__Clostridia;o__Christensenellales;f__Maliibacteriaceae;g__RGIG9107;s__RGIG9107 sp017431145	0	197.578	184.295	0	0	204.138	0	212.833	0	311.234	273.947	287.919	235.439	249.035	223.618	0	207.461	206.582
RGMC.12145	d__Bacteria;p__Bacillota_A;c__Clostridia;o__Oscillospirales;f__CAG-272;g__UBA1740;s__UBA1740 sp017961575	0	0	0	0	0	0	184.982	106.276	0	0	0	0	0	134.594	0	143.533	0	0
RGMC.12146	d__Bacteria;p__Bacillota_A;c__Clostridia;o__Christensenellales;f__Aristaeellaceae;g__Aristaeella;s__Aristaeella sp017431005	167.903	356.392	289.208	447.591	528.724	459.628	423.066	482.348	170.799	799.618	796.801	851.384	650.855	711.719	670.62	270.702	519.774	523.365
RGMC.12148	d__Bacteria;p__Bacillota_I;c__Bacilli_A;o__Erysipelotrichales;f__Erysipelotrichaceae;g__Bulleidia;s__Bulleidia sp017430925	0	98.0762	0	249.608	452.589	221.413	468.182	270.92	0	537.225	735.301	774.163	850.944	882.044	724.363	137.863	395.51	398.411
RGMC.12150	d__Bacteria;p__Bacillota_A;c__Clostridia;o__Lachnospirales;f__Lachnospiraceae;g__Chordicoccus;s__Chordicoccus sp002308255	0	2458.07	3140.34	1791.01	1375.92	2301.02	1127.73	1776.21	0	0	1544.47	1590.24	1128.62	943.653	1457.09	1002.26	1703.02	1669.95
RGMC.12163	d__Bacteria;p__Bacteroidota;c__Bacteroidia;o__Bacteroidales;f__UBA932;g__Bact-11;s__Bact-11 sp017430365	329.098	222.808	234.238	209.495	195.665	206.963	231.404	250.531	256.241	176.951	203.583	203.381	217.542	236.683	197.992	263.39	201.332	197.475
RGMC.12164	d__Bacteria;p__Bacteroidota;c__Bacteroidia;o__Bacteroidales;f__Bacteroidaceae;g__UBA4372;s__UBA4372 sp902779315	294.902	168.049	154.979	171.79	0	156.609	164.613	166.25	274.206	0	0	0	0	0	139.626	261.434	140.27	140.131
RGMC.12177	d__Bacteria;p__Verrucomicrobiota;c__Kiritimatiellia;o__RFP12;f__UBA1067;g__RUG572;s__RUG572 sp017430155	323.322	159.025	135.288	259.127	309.958	177.853	384.007	210.085	273.048	701.369	336.27	375.526	436.982	482.651	332.098	327.113	269.326	266.609
RGMC.12185	d__Bacteria;p__Bacillota_C;c__Negativicutes;o__Acidaminococcales;f__Acidaminococcaceae;g__Succiniclasticum;s__Succiniclasticum sp017443005	120.231	116.446	155.583	0	0	0	0	0	0	0	0	0	0	0	0	0	0	0
RGMC.12187	d__Bacteria;p__Bacteroidota;c__Bacteroidia;o__Bacteroidales;f__UBA932;g__Cryptobacteroides;s__Cryptobacteroides sp017429885	253.952	144.519	185.189	0	0	116.439	0	121.667	174.711	0	0	0	0	0	0	161.111	0	0
RGMC.12191	d__Bacteria;p__Bacillota_A;c__Clostridia;o__Christensenellales;f__Christensenellaceae;g__QANA01;s__QANA01 sp017439085	485.354	349.782	124.863	338.132	349.754	322.665	460.593	444.147	427.886	279.57	307.613	346.286	368.859	382.222	327.496	421.747	355.178	353.864
RGMC.12195	d__Bacteria;p__Bacteroidota;c__Bacteroidia;o__Bacteroidales;f__UBA932;g__Cryptobacteroides;s__Cryptobacteroides sp017429765	207.249	120.162	214.755	0	0	0	0	116.005	156.356	0	0	0	0	0	0	126.124	0	0
RGMC.122	d__Bacteria;p__Bacillota_A;c__Clostridia;o__Lachnospirales;f__Lachnospiraceae;g__RUG11977;s__RUG11977 sp016287095	5972.09	2320.78	1431.89	3211.26	6115.38	3062.62	13306.8	7349.24	3870.95	4687.18	6027.46	4900.13	10769.9	18521.9	4122.64	7248.35	7398.85	7275.22
RGMC.12200	d__Bacteria;p__Bacillota_C;c__Negativicutes;o__Acidaminococcales;f__Acidaminococcaceae;g__Succiniclasticum;s__Succiniclasticum sp017443005	168.911	165.381	198.754	0	0	0	0	128.036	0	0	0	0	0	0	0	0	0	0
RGMC.12203	d__Bacteria;p__Bacillota_A;c__Clostridia;o__Christensenellales;f__CAG-138;g__UBA3792;s__UBA3792 sp017428025	0	0	0	0	0	0	0	102.445	0	0	137.703	147.694	132.525	145.724	123.757	0	103.645	96.7009
RGMC.12204	d__Bacteria;p__Bacillota_A;c__Clostridia;o__Lachnospirales;f__Lachnospiraceae;g__XBB1006;s__XBB1006 sp016283755	499.05	0	0	1198.88	848.604	1020.77	2279.35	1307.06	717.237	0	0	0	285.277	355.248	0	1526.39	1230.62	1226.39
RGMC.12214	d__Bacteria;p__Bacillota_A;c__Clostridia;o__Oscillospirales;f__Acutalibacteraceae;g__RGIG2774;s__RGIG2774 sp017429345	0	0	0	0	0	0	0	0	0	312.47	0	0	0	0	0	0	0	0
RGMC.12220	d__Bacteria;p__Bacillota_A;c__Clostridia;o__Oscillospirales;f__Ruminococcaceae;g__Ruminococcus;s__Ruminococcus sp001604035	0	0	0	0	0	0	0	0	0	470.509	385.499	438.648	324.238	349.166	370.291	0	0	0
RGMC.12232	d__Bacteria;p__Bacteroidota;c__Bacteroidia;o__Bacteroidales;f__UBA932;g__Cryptobacteroides;s__Cryptobacteroides sp017428945	867.726	503.524	469.552	541.143	415.524	504.806	498.121	468.611	796.112	264.583	286.868	286.852	371.774	350.169	352.207	647.736	391.849	388.488
RGMC.12242	d__Bacteria;p__Bacteroidota;c__Bacteroidia;o__Bacteroidales;f__UBA932;g__Cryptobacteroides;s__Cryptobacteroides sp017428725	255.299	0	0	186.4	181.122	155.516	195.898	155.661	0	0	177.655	187.848	179.395	184.318	170.171	244.765	182.718	183.063
RGMC.12249	d__Bacteria;p__Bacteroidota;c__Kapaibacteriia;o__Kapaibacteriales;f__UBA2268;g__JAAYTD01;s__JAAYTD01 sp017428585	2899.45	1722.84	592.22	1727.64	1065.75	2286.17	2669.62	2981.11	3035.02	322.273	250.283	308.2	442.735	576.078	377.005	3231.99	1530.66	1521.68
RGMC.12252	d__Bacteria;p__Bacillota_A;c__Clostridia;o__Oscillospirales;f__Acutalibacteraceae;g__CAG-177;s__CAG-177 sp017428525	0	0	0	0	227.353	0	0	181.505	0	1068.89	593.784	658.462	490.925	534.998	465.844	0	224.937	225.292
RGMC.12253	d__Bacteria;p__Bacillota_A;c__Clostridia;o__Saccharofermentanales;f__Saccharofermentanaceae;g__Firm-16;s__Firm-16 sp017428545	0	0	0	0	0	0	0	0	0	235.914	163.33	0	0	0	0	0	0	0
RGMC.12264	d__Bacteria;p__Bacteroidota;c__Bacteroidia;o__Bacteroidales;f__UBA932;g__Cryptobacteroides;s__Cryptobacteroides sp900321245	129.633	0	106.683	0	0	0	0	0	0	0	0	0	0	0	0	0	0	0
RGMC.12266	d__Bacteria;p__Bacteroidota;c__Bacteroidia;o__Bacteroidales;f__UBA932;g__Bact-11;s__Bact-11 sp017428245	772.637	471.02	529.169	485.11	430.457	462.286	498.51	481.395	552.72	693.637	531.685	532.293	543.738	573.962	486.347	574.081	491.537	485.029
RGMC.12269	d__Bacteria;p__Bacillota_A;c__Clostridia;o__Saccharofermentanales;f__Saccharofermentanaceae;g__Saccharofermentans;s__Saccharofermentans sp017428155	0	0	0	0	0	0	0	0	0	404.433	0	0	0	0	0	0	0	0
RGMC.12272	d__Bacteria;p__Bacteroidota;c__Bacteroidia;o__Bacteroidales;f__WCHB1-69;g__F23-D06;s__F23-D06 sp017540505	104.536	0	0	419.298	1048.99	206.665	860.363	154.342	172.274	1384.56	927.777	1040.04	1023.89	1062.61	1006.88	445.418	586.173	589.335
RGMC.12275	d__Bacteria;p__Bacillota_A;c__Clostridia;o__Christensenellales;f__CAG-138;g__UBA3792;s__UBA3792 sp017428025	0	0	0	0	0	0	150.38	136.973	0	0	210.62	230.781	196.685	205.062	191.362	0	160.598	162.087
RGMC.12276	d__Bacteria;p__Bacillota_A;c__Clostridia;o__Oscillospirales;f__Acutalibacteraceae;g__RUG806;s__RUG806 sp017428085	0	240.233	334.913	197.608	205.934	236.639	204.477	327.723	0	755.056	413.721	415.88	348.455	402.869	276.142	0	278.815	272.659
RGMC.12281	d__Bacteria;p__Bacteroidota;c__Bacteroidia;o__Bacteroidales;f__Bacteroidaceae;g__UBA4372;s__UBA4372 sp017427185	117.123	0	0	0	0	0	0	0	0	0	0	0	0	0	0	124.939	0	0
RGMC.12291	d__Bacteria;p__Bacillota_A;c__Clostridia;o__Oscillospirales;f__Oscillospiraceae;g__Vescimonas;s__Vescimonas sp017427645	0	0	154.408	0	0	0	0	0	0	0	0	0	0	0	0	0	0	0
RGMC.12292	d__Bacteria;p__Bacillota_A;c__Clostridia;o__Lachnospirales;f__Lachnospiraceae;g__Acetatifactor;s__Acetatifactor sp016290775	3154.45	1461.64	585.579	2726.17	1758.82	1785.65	2190.85	1476.68	3007.32	1630.91	948.476	1351.46	1346.74	1073.81	1602.1	3822.7	2246.75	2137.05
RGMC.12296	d__Bacteria;p__Spirochaetota;c__Spirochaetia;o__Sphaerochaetales;f__Sphaerochaetaceae;g__UBA9732;s__UBA9732 sp902781545	0	0	0	0	92.2546	0	132.89	0	85.2349	0	0	0	99.5304	0	88.3449	93.4406	0	0
RGMC.12299	d__Bacteria;p__Bacillota_A;c__Clostridia;o__Christensenellales;f__Christensenellaceae;g__QANA01;s__QANA01 sp017439085	454.604	328.177	143.973	316.815	326.982	315.004	411.021	408.511	384.788	284.095	313.841	342.82	341.754	345.307	323.638	380.183	327.428	328.921
RGMC.12301	d__Bacteria;p__Bacillota_A;c__Clostridia;o__Lachnospirales;f__Lachnospiraceae;g__RUG11977;s__RUG11977 sp017427415	0	0	0	0	325.785	0	322.597	0	0	987.293	549.333	675.275	925.042	1091.37	897.467	0	0	0
RGMC.12303	d__Bacteria;p__Bacteroidota;c__Bacteroidia;o__Bacteroidales;f__UBA932;g__Cryptobacteroides;s__Cryptobacteroides sp017427385	1089.69	729.693	789.551	747.692	589.21	726.889	780.439	748.712	1010.34	405.586	410.499	397.342	518.743	578.561	483.978	992.327	571.399	561.931
RGMC.12314	d__Bacteria;p__Bacteroidota;c__Bacteroidia;o__Bacteroidales;f__Bacteroidaceae;g__UBA4372;s__UBA4372 sp017427185	311.767	155.958	0	227.968	0	179.971	204.023	183.837	271.631	0	0	0	0	0	0	359.406	181.417	183.66
RGMC.12315	d__Bacteria;p__Bacillota_A;c__Clostridia;o__Christensenellales;f__Aristaeellaceae;g__Aristaeella;s__Aristaeella sp017427165	0	296.299	306.319	351.419	397.384	331.719	0	318.459	0	764.974	545.806	576.909	429.444	439.947	451.556	0	317.662	317.901
RGMC.12316	d__Bacteria;p__Bacteroidota;c__Bacteroidia;o__Bacteroidales;f__Bacteroidaceae;g__UBA2918;s__UBA2918 sp017427065	1057.54	516.708	460.756	616.697	510.88	551.728	739.287	667.726	1020.94	353.995	347.435	403.244	483.817	513.229	474.889	892.879	461.692	466.734
RGMC.12318	d__Bacteria;p__Bacillota_A;c__Clostridia;o__Oscillospirales;f__Feifaniaceae;g__Galloscillospira_B;s__Galloscillospira_B sp017427525	0	0	0	0	0	0	0	0	0	511.62	438.119	507.053	493.634	479.185	430.926	0	0	0
RGMC.12325	d__Bacteria;p__Bacillota_A;c__Clostridia;o__Christensenellales;f__Christensenellaceae;g__QANA01;s__QANA01 sp017439085	671.151	465.912	167.936	444.98	466.466	462.528	600.216	621.783	575.705	387.864	435.509	469.072	503.146	510.226	456.722	559.539	492.128	485.376
RGMC.12327	d__Bacteria;p__Bacteroidota;c__Bacteroidia;o__Bacteroidales;f__P3;g__UBA1711;s__UBA1711 sp900317125	254.999	0	0	0	0	0	0	0	0	0	0	0	0	0	0	0	0	0
RGMC.12328	d__Bacteria;p__Bacteroidota;c__Bacteroidia;o__Bacteroidales;f__Bacteroidaceae;g__UBA4372;s__UBA4372 sp902779315	352.228	190.796	183.437	188.667	0	166.159	0	164.916	289.429	0	0	0	0	0	151.235	313.22	0	0
RGMC.12335	d__Bacteria;p__Bacillota_A;c__Clostridia;o__Lachnospirales;f__Lachnospiraceae;g__RUG11977;s__RUG11977 sp017427415	0	0	0	0	0	0	0	0	0	419.876	236.93	274.983	361.226	408.917	357.65	0	0	0
RGMC.12341	d__Bacteria;p__Bacillota_A;c__Clostridia;o__Saccharofermentanales;f__Saccharofermentanaceae;g__Firm-16;s__Firm-16 sp017428545	0	0	0	0	0	0	0	0	0	270.399	184.349	0	0	0	0	0	0	0
RGMC.12345	d__Bacteria;p__Bacteroidota;c__Bacteroidia;o__Bacteroidales;f__UBA4181;g__UBA4181;s__UBA4181 sp017523725	144.169	0	0	0	0	0	0	0	147.116	0	0	0	0	0	0	0	0	0
RGMC.12347	d__Bacteria;p__Bacillota_A;c__Clostridia;o__Oscillospirales;f__Ruminococcaceae;g__HUN007;s__HUN007 sp017438745	2185.6	2723.72	2483.81	2390.32	3032.82	2350.1	3068.68	2184.48	2241.37	2020.79	1826.4	2453.37	1838.48	1906.59	1920	2403.12	2005.63	1978.79
RGMC.12348	d__Bacteria;p__Bacteroidota;c__Bacteroidia;o__Bacteroidales;f__UBA932;g__Bact-11;s__Bact-11 sp002361615	0	0	0	0	0	0	0	0	0	279.974	189.75	0	188.229	198.738	172.729	0	182.819	180.823
RGMC.12351	d__Bacteria;p__Bacillota_A;c__Clostridia;o__Lachnospirales;f__Lachnospiraceae;g__UBA1267;s__UBA1267 sp002308115	0	0	0	118.547	0	133.069	0	119.669	0	184.979	159.872	172.847	148.22	161.328	144.364	0	126.093	119.842
RGMC.12356	d__Bacteria;p__Bacillota_A;c__Clostridia;o__Lachnospirales;f__Lachnospiraceae;g__UBA1267;s__UBA1267 sp017441825	0	211.369	204.763	285.177	342.744	313.206	327.241	342.42	0	686.583	555.635	556.392	505.84	563.598	431.406	174.374	381.139	390.964
RGMC.12359	d__Bacteria;p__Bacteroidota;c__Bacteroidia;o__Bacteroidales;f__Paludibacteraceae;g__UBA1723;s__UBA1723 sp002371265	851.636	576.197	460.938	664.558	619.876	707.697	715.199	708.228	1074.18	323.577	331.005	322.067	553.348	657.8	538.473	1024.52	565.91	555.544
RGMC.12363	d__Bacteria;p__Bacillota_A;c__Clostridia;o__Peptostreptococcales;f__Anaerovoracaceae;g__Lentihominibacter;s__Lentihominibacter sp017438285	796.7	1910.85	2073.51	2588.5	3258.19	2824.45	3466.69	3526.9	944.938	3859.53	3695.92	3710.52	3684.12	4637.38	3327.55	1498.19	3491.75	3445.46
RGMC.12365	d__Bacteria;p__Bacteroidota;c__Bacteroidia;o__Bacteroidales;f__UBA932;g__Cryptobacteroides;s__Cryptobacteroides sp017438265	300.428	188.944	0	0	0	0	0	0	301.249	0	0	0	0	0	0	0	0	0
RGMC.12366	d__Bacteria;p__Bacillota_A;c__Clostridia;o__Lachnospirales;f__Lachnospiraceae;g__Eubacterium_F;s__Eubacterium_F sp017445525	0	0	127.348	0	0	0	0	0	158.281	0	0	0	0	0	0	0	0	0
RGMC.12370	d__Bacteria;p__Bacteroidota;c__Bacteroidia;o__Bacteroidales;f__UBA932;g__Cryptobacteroides;s__Cryptobacteroides sp900319375	165.575	112.89	122.323	0	0	106.611	0	101.034	189.902	0	0	0	0	0	0	157.488	0	0
RGMC.12371	d__Bacteria;p__Bacillota_A;c__Clostridia;o__Lachnospirales;f__Anaerotignaceae;g__RGIG5631;s__RGIG5631 sp017534115	0	0	0	0	0	0	0	0	0	373.447	269.483	0	344.795	381.664	311.674	0	0	0
RGMC.12373	d__Bacteria;p__Bacteroidota;c__Bacteroidia;o__Bacteroidales;f__BM520;g__RGIG7150;s__RGIG7150 sp016285515	0	0	0	189.063	357.378	129.009	635.392	0	0	634.312	431.628	414.54	601.086	802.214	424.673	223.978	278.25	282.561
RGMC.12379	d__Bacteria;p__Bacillota_A;c__Clostridia;o__Oscillospirales;f__QAMX01;g__RUG11797;s__RUG11797 sp017441705	0	163.373	0	193.678	199.446	248.368	179.141	277.85	0	271.566	267.702	262.594	233.479	247.382	212.394	121.787	201.748	204.408
RGMC.12385	d__Bacteria;p__Bacteroidota;c__Bacteroidia;o__Bacteroidales;f__UBA932;g__Cryptobacteroides;s__Cryptobacteroides sp017437825	222.068	0	0	255.514	263.11	176.959	320.307	151.621	219.262	296.6	258.375	288.899	301.381	318.915	303.591	310.093	237.149	233.874
RGMC.12388	d__Bacteria;p__Bacteroidota;c__Bacteroidia;o__Bacteroidales;f__P3;g__UBA1711;s__UBA1711 sp017545365	0	0	0	0	0	0	0	0	0	276.322	0	213.004	0	0	207.531	0	0	0
RGMC.12389	d__Bacteria;p__Bacillota_A;c__Clostridia;o__Lachnospirales;f__Lachnospiraceae;g__NK4A136;s__NK4A136 sp017437785	0	141.787	0	0	227.274	0	0	0	0	0	0	172.038	0	0	0	0	171.667	168.973
RGMC.12393	d__Bacteria;p__Bacillota_A;c__Clostridia;o__Oscillospirales;f__Ruminococcaceae;g__Ruminococcus;s__Ruminococcus sp017441505	0	0	0	0	210.895	0	0	0	0	0	0	0	0	0	0	0	0	0
RGMC.12397	d__Bacteria;p__Bacteroidota;c__Bacteroidia;o__Bacteroidales;f__UBA932;g__Cryptobacteroides;s__Cryptobacteroides sp017443465	122.215	0	117.32	0	0	0	0	0	0	0	0	0	0	0	0	0	0	0
RGMC.12399	d__Bacteria;p__Synergistota;c__Synergistia;o__Synergistales;f__Synergistaceae;g__Synergistes;s__Synergistes sp016288355	0	0	0	0	0	0	0	0	0	400.235	196.394	0	205.8	0	0	0	0	0
RGMC.12404	d__Bacteria;p__Bacillota_A;c__Clostridia;o__Lachnospirales;f__Lachnospiraceae;g__RGIG5612;s__RGIG5612 sp017441295	0	0	0	0	0	0	0	119.571	0	0	0	0	0	0	0	0	0	0
RGMC.12412	d__Bacteria;p__Bacteroidota;c__Bacteroidia;o__Bacteroidales;f__WCHB1-69;g__UBA1195;s__UBA1195 sp902774175	0	0	0	0	0	0	0	0	0	203.178	164.44	171.818	189.701	202.135	166.68	0	0	0
RGMC.12413	d__Bacteria;p__Bacillota_A;c__Clostridia;o__Peptostreptococcales;f__Anaerovoracaceae;g__Eubacterium_B;s__Eubacterium_B sp017437565	0	147.912	187.787	167.069	159.791	187.356	142.849	182.907	0	254.436	221.579	226.521	177.303	186.107	170.337	0	207.275	209.049
RGMC.12414	d__Bacteria;p__Desulfobacterota;c__Desulfuromonadia;o__Desulfuromonadales;f__JAAYDE01;g__RGIG7977;s__RGIG7977 sp017417085	0	0	0	358.33	362.13	245.73	367.663	189.7	0	532.379	479.877	532.637	349.227	396.721	391.764	330.012	454.331	442.61
RGMC.12428	d__Bacteria;p__Bacteroidota;c__Bacteroidia;o__Bacteroidales;f__UBA932;g__Cryptobacteroides;s__Cryptobacteroides sp902761655	0	0	0	0	465.817	0	484.339	0	0	1254.46	701.475	830.469	790.33	930.565	920.667	0	320.054	307.734
RGMC.12429	d__Bacteria;p__Bacillota_A;c__Clostridia;o__Lachnospirales;f__Bianqueaceae;g__RUG12817;s__RUG12817 sp017442535	0	0	0	0	0	116.788	0	113.713	0	0	122.966	0	109.309	0	96.2313	0	117.431	113.355
RGMC.12618	d__Bacteria;p__Bacillota_C;c__Negativicutes;o__Acidaminococcales;f__Acidaminococcaceae;g__Succiniclasticum;s__Succiniclasticum sp017443005	167.563	142.686	177.596	0	0	0	0	111.525	0	0	0	0	0	0	0	0	0	0
RGMC.12629	d__Bacteria;p__Bacteroidota;c__Bacteroidia;o__Bacteroidales;f__WCHB1-69;g__UBA1756;s__UBA1756 sp900321845	0	0	0	172.563	391.903	0	361.038	0	0	323.681	290.314	314.586	314.673	316.212	315.303	0	294.907	292.286
RGMC.12636	d__Bacteria;p__Bacteroidota;c__Bacteroidia;o__Bacteroidales;f__Bacteroidaceae;g__UBA4334;s__UBA4334 sp017448965	281.36	147.755	0	196.725	274.737	177.244	330.544	0	235.723	0	0	239.092	231.082	277.792	248.64	302.517	180.609	182.927
RGMC.12638	d__Bacteria;p__Bacteroidota;c__Bacteroidia;o__Bacteroidales;f__Muribaculaceae;g__RUG14106;s__RUG14106 sp017552595	191.601	154.859	279.691	355.198	281.839	210.553	299.319	264.402	264.673	229.247	149.389	216.119	234.813	233.782	214.186	352.384	253.382	260.36
RGMC.12639	d__Bacteria;p__Bacillota_A;c__Clostridia;o__Christensenellales;f__Aristaeellaceae;g__RUG563;s__RUG563 sp017448975	2748.58	2653.11	2322.65	2746.35	3431	2485.15	2553.6	2049.85	2865.93	3720.81	3671.53	3594.99	3081.01	2780.5	3248.13	2775.09	2460.99	2444.09
RGMC.12681	d__Bacteria;p__Planctomycetota;c__Planctomycetia;o__Pirellulales;f__Thermoguttaceae;g__RGIG3701;s__RGIG3701 sp017447865	0	0	0	0	1300.25	0	791.35	0	0	1574.19	2287.92	2456.73	2467.12	2577.55	2426.36	0	234.366	237.227
RGMC.12687	d__Bacteria;p__Bacteroidota;c__Bacteroidia;o__Bacteroidales;f__Bacteroidaceae;g__UBA4372;s__UBA4372 sp900318115	754.237	410.633	378.578	473.856	331.17	383.612	396.718	338.275	544.399	181.961	162.276	172.487	208.12	164.702	195.893	667.161	353.114	351.677
RGMC.12688	d__Bacteria;p__Planctomycetota;c__Planctomycetia;o__Pirellulales;f__Thermoguttaceae;g__RUG11551;s__RUG11551 sp017447745	0	0	0	388.467	0	175.323	390.114	0	0	0	0	0	0	0	0	316.041	349.895	346.43
RGMC.12698	d__Bacteria;p__Bacteroidota;c__Bacteroidia;o__Bacteroidales;f__Bacteroidaceae;g__Prevotella;s__Prevotella sp017447515	106.787	0	0	0	0	0	0	0	0	0	0	0	0	0	0	0	0	0
RGMC.12712	d__Bacteria;p__Bacteroidota;c__Bacteroidia;o__Bacteroidales;f__UBA932;g__Bact-11;s__Bact-11 sp017447265	10921.4	6888.29	7414.54	7161.71	6002.42	7011.83	8084.89	6859.94	10661.2	4831.89	3919.11	3672.59	4367.97	4135.36	4072.91	9097.98	6211.18	6239.01
RGMC.12724	d__Bacteria;p__Bacillota_C;c__Negativicutes;o__Acidaminococcales;f__Acidaminococcaceae;g__Succiniclasticum;s__Succiniclasticum sp017443165	0	0	0	0	0	0	0	0	0	284.068	189.467	220.363	191.72	176.899	178.627	0	0	0
RGMC.12736	d__Bacteria;p__Bacteroidota;c__Bacteroidia;o__Bacteroidales;f__Bacteroidaceae;g__UBA2918;s__UBA2918 sp017442855	718.25	416.513	534.981	367.745	0	373.49	459.494	0	683.773	0	0	0	0	0	252.42	596.562	316.723	316.297
RGMC.12749	d__Bacteria;p__Bacillota_C;c__Negativicutes;o__Acidaminococcales;f__Acidaminococcaceae;g__Succiniclasticum;s__	252.86	147.821	0	361.162	354.324	249.619	315.021	278.989	258.921	1005.63	944.088	999.236	850.751	888.884	920.144	383.205	303.36	306.191
RGMC.1275	d__Bacteria;p__Spirochaetota;c__Spirochaetia;o__Treponematales;f__Treponemataceae;g__Treponema_D;s__Treponema_D sp002309195	0	0	0	0	0	0	0	0	0	0	0	0	0	113.172	92.6021	0	0	0
RGMC.12755	d__Bacteria;p__Bacteroidota;c__Bacteroidia;o__Bacteroidales;f__Paludibacteraceae;g__UBA4363;s__UBA4363 sp017446585	0	0	0	0	0	0	0	0	150.973	0	0	0	0	0	0	0	0	0
RGMC.12756	d__Bacteria;p__Bacteroidota;c__Bacteroidia;o__Bacteroidales;f__UBA932;g__Cryptobacteroides;s__Cryptobacteroides sp902787255	105.579	0	80.1226	93.1064	134.485	0	157.615	0	123.051	182.206	237.506	264.136	446.909	438.381	399.169	153.036	80.0623	79.0004
RGMC.12775	d__Bacteria;p__Bacteroidota;c__Bacteroidia;o__Bacteroidales;f__WCHB1-69;g__RUG11690;s__RUG11690 sp902771655	7605.49	4559.24	2903.07	3076.79	1709.68	3760.48	2660.22	3959.25	6654.85	1132.55	739.612	799.143	1189.29	1183.96	1051.12	5810.01	2459.75	2453.03
RGMC.12780	d__Bacteria;p__Armatimonadota;c__UBA5829;o__UBA5829;f__UBA5829;g__RGIG7931;s__RGIG7931 sp017959625	0	0	0	205.312	297.732	0	295.423	0	0	777.983	522.924	504.931	533.761	553.602	476.534	162.261	296.967	292.437
RGMC.12785	d__Bacteria;p__Bacillota_A;c__Clostridia;o__Oscillospirales;f__Oscillospiraceae;g__RGIG7114;s__RGIG7114 sp017445985	0	0	0	0	0	0	0	0	0	259.865	0	0	0	0	0	0	0	0
RGMC.12788	d__Bacteria;p__Synergistota;c__Synergistia;o__Synergistales;f__Aminobacteriaceae;g__JAFUYV01;s__JAFUYV01 sp016280565	942.081	629.507	708.847	527.979	475.231	516.655	559.979	567.801	660.162	775.144	509.137	508.702	497.86	528.215	446.064	747.656	601.431	595.556
RGMC.12798	d__Bacteria;p__Bacillota_A;c__Clostridia;o__Oscillospirales;f__CAG-272;g__UBA1770;s__UBA1770 sp017451045	124.261	0	0	166.586	0	0	233.051	160.937	171.273	263.328	0	0	178.63	153.142	143.165	200.421	143.466	151.317
RGMC.12801	d__Bacteria;p__Bacteroidota;c__Bacteroidia;o__Bacteroidales;f__Bacteroidaceae;g__UBA4334;s__UBA4334 sp017450985	535.509	332.771	373.007	379.061	257.346	524.354	622.348	326.871	550.475	0	149.03	0	169.534	0	0	669.805	250.095	247.143
RGMC.1281	d__Bacteria;p__Bacillota_A;c__Clostridia;o__Oscillospirales;f__Oscillospiraceae;g__Limivicinus;s__Limivicinus sp900317375	0	466.102	447.019	574.572	574.437	442.446	467.657	418.747	227.259	816.101	845.914	894.478	752.492	725.474	708.299	404.829	621.514	618.417
RGMC.12811	d__Bacteria;p__Bacillota_A;c__Clostridia;o__Christensenellales;f__Aristaeellaceae;g__RUG756;s__RUG756 sp902803675	0	177.481	0	0	0	186.121	0	207.929	0	0	235.439	0	0	0	177.302	0	196.708	200.355
RGMC.12816	d__Bacteria;p__Bacteroidota;c__Bacteroidia;o__Bacteroidales;f__UBA932;g__RUG11257;s__RUG11257 sp017450655	376.319	0	259.768	0	0	0	0	0	377.428	0	0	0	0	0	0	0	0	0
RGMC.12818	d__Bacteria;p__Bacteroidota;c__Bacteroidia;o__Bacteroidales;f__Paludibacteraceae;g__RF16;s__RF16 sp017450605	243.942	126.574	0	0	144.191	130.224	180.726	108.301	199.8	168.962	0	0	144.057	0	147.081	231.219	139.935	143.226
RGMC.12826	d__Bacteria;p__Verrucomicrobiota;c__Lentisphaeria;o__Victivallales;f__UBA1829;g__UBA11452;s__	0	0	0	0	0	0	0	0	0	152.528	0	0	0	0	0	0	0	0
RGMC.12830	d__Bacteria;p__Bacteroidota;c__Bacteroidia;o__Bacteroidales;f__UBA3663;g__UBA3663;s__UBA3663 sp902776605	1308.01	973.87	1024.75	766.418	550.443	981.065	808.682	875.8	1573.4	254.5	219.246	250.367	420.263	401.04	348.074	1170.14	550.519	554.3
RGMC.12831	d__Bacteria;p__Desulfobacterota;c__Desulfuromonadia;o__Desulfuromonadales;f__JAAYDE01;g__RGIG7977;s__RGIG7977 sp017417085	0	0	0	226.909	218.654	160.118	248.208	143.28	0	368.189	288.037	327.706	213.421	253.685	211.833	242.931	306.834	301.318
RGMC.12835	d__Bacteria;p__Bacteroidota;c__Bacteroidia;o__Bacteroidales;f__UBA4181;g__UBA4181;s__UBA4181 sp017523725	103.19	0	0	0	0	0	0	0	112.813	0	0	0	0	0	0	0	0	0
RGMC.12840	d__Bacteria;p__Bacteroidota;c__Bacteroidia;o__Bacteroidales;f__UBA932;g__RUG11257;s__RUG11257 sp017445425	192	0	119.373	0	0	0	0	0	170.911	157.436	0	0	0	0	0	175.899	116.407	112.225
RGMC.12846	d__Bacteria;p__Bacillota_A;c__Clostridia;o__Oscillospirales;f__Ruminococcaceae;g__Hominimerdicola;s__Hominimerdicola alba_A	0	437.794	537.279	290.873	396.557	285.717	260.16	355.179	191.875	0	263.809	252.275	0	0	213.708	0	205.777	199.217
RGMC.12848	d__Bacteria;p__Bacillota_A;c__Clostridia;o__Lachnospirales;f__Anaerotignaceae;g__RGIG5631;s__RGIG5631 sp017534115	0	0	0	0	0	0	0	0	0	0	0	0	0	0	262.396	0	0	0
RGMC.12850	d__Bacteria;p__Bacillota_I;c__Bacilli_A;o__Erysipelotrichales;f__Erysipelotrichaceae;g__RUG521;s__RUG521 sp017445225	153.903	122.875	139.683	113.745	0	114.088	0	124.152	120.39	0	0	0	0	0	0	121.31	85.1872	91.3289
RGMC.12857	d__Bacteria;p__Bacteroidota;c__Bacteroidia;o__Bacteroidales;f__Paludibacteraceae;g__RF16;s__RF16 sp900321775	759.3	476.93	572.945	388.76	261.521	439.524	444.442	445.731	730.204	0	0	0	0	0	0	544.936	279.013	282.632
RGMC.12863	d__Bacteria;p__Armatimonadota;c__UBA5829;o__UBA5829;f__UBA5829;g__RGIG7931;s__RGIG7931 sp017445025	0	0	0	123.413	0	121.455	0	0	137.604	0	0	0	0	0	0	197.102	0	0
RGMC.12881	d__Bacteria;p__Bacillota_A;c__Clostridia;o__Lachnospirales;f__Lachnospiraceae;g__RGIG3528;s__RGIG3528 sp017444675	532.963	407.574	262.374	458.567	479.493	478.755	675.61	595.174	722.82	323.882	273.273	284.323	517.546	558.508	499.729	749.061	376.025	369.911
RGMC.12886	d__Bacteria;p__Bacillota_A;c__Clostridia;o__Lachnospirales;f__Lachnospiraceae;g__NK4A144;s__NK4A144 sp017444545	0	0	107.886	0	0	0	0	0	0	0	0	0	0	0	0	0	0	0
RGMC.129	d__Bacteria;p__Desulfobacterota;c__Desulfovibrionia;o__Desulfovibrionales;f__Desulfovibrionaceae;g__Desulfovibrio;s__Desulfovibrio sp016284885	320.439	255.073	0	526.788	689.274	494.013	757.73	581.325	324.202	800.715	936.488	805.92	861.014	1046.93	752.73	415.58	476.84	482.831
RGMC.12907	d__Bacteria;p__Armatimonadota;c__UBA5829;o__UBA5829;f__UBA5829;g__RGIG10368;s__	0	0	0	269.638	226.185	213.475	231.963	197.033	0	205.499	216.406	192.858	219.432	239.383	189.12	142.476	287.608	285.216
RGMC.12926	d__Bacteria;p__Bacteroidota;c__Bacteroidia;o__Bacteroidales;f__Muribaculaceae;g__Sodaliphilus;s__Sodaliphilus sp017443765	423.409	413.78	424.381	382.667	345.125	389.162	307.408	343.772	296.545	274.5	373.528	355.087	378.547	407.954	316.013	347.827	330.356	334.605
RGMC.12936	d__Bacteria;p__Bacillota_A;c__Clostridia;o__Lachnospirales;f__Lachnospiraceae;g__UBA2868;s__UBA2868 sp017450065	0	0	378.222	0	0	0	0	0	0	0	0	0	0	0	0	0	0	0
RGMC.12953	d__Bacteria;p__Bacillota_A;c__Clostridia;o__Oscillospirales;f__CAG-272;g__RUG14240;s__RUG14240 sp902797125	0	0	0	0	0	0	168.252	112.52	0	0	0	0	133.077	138.159	109.44	0	0	0
RGMC.12968	d__Bacteria;p__Bacillota_A;c__Clostridia;o__Lachnospirales;f__Lachnospiraceae;g__UBA2868;s__UBA2868 sp017458765	588.399	1714.06	2678.01	1229.14	1202.02	1055.52	796.836	843.495	617.061	572.431	693.169	683.556	379.185	367.704	479.163	677.659	1126.26	1106.21
RGMC.12974	d__Bacteria;p__Spirochaetota;c__Spirochaetia;o__Sphaerochaetales;f__Sphaerochaetaceae;g__UBA9732;s__UBA9732 sp902781545	0	0	0	0	97.8522	0	140.004	0	98.3353	0	0	0	103.058	97.5347	98.4628	99.9698	0	0
RGMC.12977	d__Bacteria;p__Bacteroidota;c__Bacteroidia;o__Bacteroidales;f__Bacteroidaceae;g__Ga6A1;s__Ga6A1 sp900102385	0	0	0	0	0	0	213.948	0	0	0	0	0	0	0	0	0	0	0
RGMC.1298	d__Bacteria;p__Bacillota_A;c__Clostridia;o__Lachnospirales;f__Lachnospiraceae;g__UBA1712;s__UBA1712 sp017540355	1084.56	841.166	669.286	693.43	480.366	672.408	510.627	629.783	1031.48	0	0	0	189.438	181.55	234.986	998.174	413.885	405.424
RGMC.12980	d__Bacteria;p__Spirochaetota;c__Spirochaetia;o__CADAEX01;f__CADAEX01;g__CADAEX01;s__CADAEX01 sp902787125	0	0	0	0	0	0	345.627	0	0	0	0	0	0	0	0	0	0	0
RGMC.12989	d__Bacteria;p__Planctomycetota;c__Planctomycetia;o__Pirellulales;f__Thermoguttaceae;g__RUG369;s__RUG369 sp902803085	376.683	220.598	170.576	262.304	193.258	259.245	240.903	276.999	328.253	248.691	180.049	168.3	192.255	195.888	151.27	364.811	207.013	207.544
RGMC.12992	d__Bacteria;p__Pseudomonadota;c__Alphaproteobacteria;o__Rhizobiales;f__Rhizobiaceae;g__Phyllobacterium;s__Phyllobacterium calauticae	90.1105	107.276	149.105	83.8816	103.385	86.8066	154.897	149.233	156.379	0	60.802	0	86.4878	276.037	102.424	123.017	151.083	146.856
RGMC.13002	d__Bacteria;p__Bacteroidota;c__Bacteroidia;o__Bacteroidales;f__UBA932;g__Cryptobacteroides;s__Cryptobacteroides sp017455065	181.878	0	0	0	0	0	0	0	203.487	0	0	0	0	0	0	0	0	0
RGMC.13006	d__Bacteria;p__Bacteroidota;c__Bacteroidia;o__Bacteroidales;f__WCHB1-69;g__JAFTCA01;s__JAFTCA01 sp017454945	0	0	0	0	0	0	0	0	0	0	0	0	0	0	166.303	0	0	0
RGMC.13012	d__Bacteria;p__Bacillota_I;c__Bacilli_A;o__Erysipelotrichales;f__Erysipelotrichaceae;g__UBA636;s__UBA636 sp017454765	167.33	114.094	0	139.712	0	141.202	154.732	151.819	146.446	152.393	125.622	0	0	150.895	134.613	156.576	129.703	123.612
RGMC.13013	d__Bacteria;p__Bacillota_A;c__Clostridia;o__Lachnospirales;f__Lachnospiraceae;g__NK4A144;s__NK4A144 sp000621405	0	0	143.883	0	0	0	0	0	0	0	0	0	0	0	0	0	0	0
RGMC.13018	d__Bacteria;p__Verrucomicrobiota;c__Verrucomicrobiae;o__Limisphaerales;f__UBA1412;g__UBA1412;s__UBA1412 sp002308515	407.568	215.535	223.722	256.777	172.908	245.019	288.856	290.522	407.459	465.15	132.757	138.17	241.503	254.869	165.505	450.621	221.371	220.536
RGMC.13028	d__Bacteria;p__Bacillota_A;c__Clostridia;o__Peptostreptococcales;f__Anaerovoracaceae;g__UBA3871;s__UBA3871 sp002392265	484.969	316.591	0	460.134	486.482	412.245	655.13	441.139	466.456	593.618	346.811	421.739	509.952	534.416	398.791	576.649	595.018	595.401
RGMC.13039	d__Bacteria;p__Bacillota_A;c__Clostridia;o__Oscillospirales;f__CAG-272;g__RGIG2161;s__RGIG2161 sp017959065	0	0	0	125.852	166.755	0	161.175	0	0	401.892	248.018	266.579	251.232	219.812	225.798	0	190.814	193.125
RGMC.1305	d__Archaea;p__Methanobacteriota;c__Methanobacteria;o__Methanobacteriales;f__Methanobacteriaceae;g__Methanobrevibacter_A;s__	423.947	845.271	0	929.032	725.575	1141.44	744.938	1175.65	421.16	0	382.335	0	399.801	473.117	363.138	520.285	1053.04	1039.33
RGMC.13064	d__Bacteria;p__Bacteroidota;c__Bacteroidia;o__Bacteroidales;f__UBA932;g__Cryptobacteroides;s__Cryptobacteroides sp017453565	322.454	219.653	289.304	158.441	0	182.413	121.012	169.226	266.256	0	0	0	0	0	0	281.646	0	0
RGMC.13089	d__Bacteria;p__Bacillota_A;c__Clostridia;o__Oscillospirales;f__Oscillospiraceae;g__Limivicinus;s__Limivicinus sp017458335	938.077	1812.57	1340.62	2107.25	2055.03	1764.47	1632.91	1458.31	821.733	1878.16	2765.76	2871.11	2062.41	2052.4	2131.55	1350.84	1936.98	1927.26
RGMC.1316	d__Bacteria;p__Bacteroidota;c__Bacteroidia;o__Bacteroidales;f__UBA932;g__Cryptobacteroides;s__	715.272	407.722	451.737	385.391	289.252	366.899	393.862	399.99	538.922	494.293	373.749	386.325	401.403	403.234	350.023	517.389	351.99	346.393
RGMC.132	d__Bacteria;p__Bacillota_A;c__Clostridia;o__Oscillospirales;f__Acutalibacteraceae;g__UBA737;s__UBA737 sp016287385	0	0	0	0	0	0	0	0	0	154.099	0	0	0	0	0	0	0	100.586
RGMC.133	d__Bacteria;p__Bacteroidota;c__Bacteroidia;o__Bacteroidales;f__UBA932;g__Bact-11;s__Bact-11 sp002361615	0	0	0	0	0	0	265.57	240.977	0	596.178	323.196	332.044	295.386	304.755	282.734	0	295.915	294.06
RGMC.13384	d__Bacteria;p__Armatimonadota;c__UBA5829;o__UBA5829;f__UBA5829;g__RGIG10368;s__RGIG10368 sp017958015	0	0	0	115.2	0	97.8164	0	0	0	0	0	0	0	0	0	0	123.707	116.746
RGMC.13424	d__Bacteria;p__Armatimonadota;c__UBA5829;o__UBA5829;f__UBA5829;g__RGIG10368;s__RGIG10368 sp017958015	0	0	0	169.592	0	159.115	0	133.402	0	0	0	0	0	0	0	0	173.027	174.884
RGMC.13431	d__Archaea;p__Halobacteriota;c__Methanomicrobia;o__Methanomicrobiales;f__Methanomicrobiaceae;g__Methanomicrobium;s__Methanomicrobium mobile	3727.98	1539.55	1954.08	863.964	1098.87	713.806	1509.31	2137.87	3752.34	2201.6	811.573	993.106	1309.11	1215.22	956.733	2440.21	1464.03	1430.09
RGMC.13543	d__Bacteria;p__Bacillota_A;c__Clostridia;o__Christensenellales;f__Aristaeellaceae;g__UBA2862;s__UBA2862 sp902765305	0	1255.42	1525.15	937.967	0	754.303	0	497.189	0	0	0	0	0	0	0	0	0	0
RGMC.13657	d__Bacteria;p__Bacteroidota;c__Bacteroidia;o__Bacteroidales;f__Paludibacteraceae;g__UBA1723;s__UBA1723 sp002371265	670.246	441.99	366.677	514.886	480.918	545.866	560.773	564.962	838.346	249.12	257.046	258.562	437.498	525.905	411.059	817.822	436.176	436.728
RGMC.13663	d__Bacteria;p__Bacteroidota;c__Bacteroidia;o__Bacteroidales;f__Bacteroidaceae;g__UBA4372;s__UBA4372 sp017427185	103.885	0	0	0	0	0	0	0	0	0	0	0	0	0	0	113.639	0	0
RGMC.13858	d__Bacteria;p__Bacillota_C;c__Negativicutes;o__Acidaminococcales;f__Acidaminococcaceae;g__Succiniclasticum;s__Succiniclasticum sp017443005	0	119.602	167.944	0	0	0	0	0	0	0	0	0	0	0	0	0	0	0
RGMC.13895	d__Bacteria;p__Bacillota_A;c__Clostridia;o__Christensenellales;f__Aristaeellaceae;g__Ventricola;s__Ventricola sp017484085	0	0	0	0	0	0	0	321.143	0	0	0	0	0	0	0	0	0	0
RGMC.13910	d__Bacteria;p__Bacillota_I;c__Bacilli_A;o__Erysipelotrichales;f__Erysipelotrichaceae;g__RUG521;s__RUG521 sp900319675	0	91.3955	132.052	0	0	101.602	0	123.848	0	0	0	0	0	0	0	0	0	0
RGMC.13972	d__Bacteria;p__Bacillota_A;c__Clostridia;o__Christensenellales;f__Aristaeellaceae;g__SFMI01;s__	348.189	271.423	256.296	392.447	458.782	318.105	348.459	257.754	0	344.922	547.75	488.444	432.08	395.516	418.798	317.724	370.835	366.851
RGMC.140	d__Bacteria;p__Bacillota_A;c__Clostridia;o__Lachnospirales;f__Lachnospiraceae;g__RGIG3528;s__RGIG3528 sp016287675	273.887	228.551	0	233.96	196.528	220.05	229.235	202.125	356.693	0	0	0	184.598	0	197.224	358.096	176.348	176.864
RGMC.14006	d__Bacteria;p__Bacteroidota;c__Bacteroidia;o__Bacteroidales;f__Bacteroidaceae;g__UBA4372;s__UBA4372 sp900318115	318.821	175.193	155.927	205.048	0	174.452	168.625	136.79	232.169	0	0	0	0	0	0	275.755	143.882	141.002
RGMC.14033	d__Bacteria;p__Bacillota_B;c__Dehalobacteriia;o__UBA4068;f__UBA4068;g__CALXSV01;s__CALXSV01 sp947307285	0	0	0	0	138.393	0	0	0	0	867.877	729.691	681.069	670.137	668.504	538.201	0	0	0
RGMC.14047	d__Bacteria;p__Bacteroidota;c__Bacteroidia;o__Bacteroidales;f__Bacteroidaceae;g__UBA4372;s__UBA4372 sp900318115	288.58	154.967	0	181.408	0	0	0	0	208.29	0	0	0	0	0	0	256.633	0	0
RGMC.1406	d__Bacteria;p__Bacillota_I;c__Bacilli_A;o__RFN20;f__CAG-826;g__RUG13091;s__	0	0	0	0	194.87	0	298.315	0	0	0	0	0	241.195	296.28	214.251	0	0	0
RGMC.14062	d__Bacteria;p__Bacillota_A;c__Clostridia;o__Lachnospirales;f__Lachnospiraceae;g__RGIG5021;s__RGIG5021 sp017479935	0	306.224	326.158	279.738	282.801	275.648	283.518	264.989	133.437	0	388.326	388.78	303.407	312.921	330.89	222.594	317.447	317.519
RGMC.14067	d__Bacteria;p__Bacteroidota;c__Bacteroidia;o__Bacteroidales;f__UBA932;g__Cryptobacteroides;s__Cryptobacteroides sp017423025	883.707	441.23	648.195	472.837	436.757	444.007	493.499	323.83	711.314	240.887	237.816	212.243	240.426	212.652	222.005	576.815	387.869	374.564
RGMC.14084	d__Bacteria;p__Bacillota_A;c__Clostridia;o__Peptostreptococcales;f__Anaerovoracaceae;g__RUG13615;s__	0	255.028	301.938	0	0	276.909	0	226.892	0	0	328.114	0	253.215	223.356	279.604	0	273.09	266.807
RGMC.14157	d__Bacteria;p__Bacillota_A;c__Clostridia;o__Lachnospirales;f__Lachnospiraceae;g__Blautia_A;s__Blautia_A sp017420455	1077.56	4483.84	5345.7	2714.55	2661.5	3228.28	1647.16	2556.17	1445.3	0	1088.67	1486	0	0	1201.77	1377.02	2134.02	2075.5
RGMC.14165	d__Bacteria;p__Bacillota_A;c__Clostridia;o__Oscillospirales;f__Acutalibacteraceae;g__Ruminococcus_E;s__Ruminococcus_E sp002350765	3998.48	7382.61	8043.09	6738.21	7752.49	6537.31	3981.14	2951.78	4204.39	4013.03	3876.59	4574.84	3734.24	2269	4677.22	4950.66	6358.04	6325.46
RGMC.14174	d__Bacteria;p__Bacillota_A;c__Clostridia;o__Lachnospirales;f__Bianqueaceae;g__RUG159;s__RUG159 sp017474705	0	173.359	203.472	0	0	0	0	195.128	0	0	178.377	179.941	176.651	192.88	152.966	0	0	149.536
RGMC.14183	d__Bacteria;p__Bacteroidota;c__Bacteroidia;o__Bacteroidales;f__Bacteroidaceae;g__Prevotella;s__Prevotella sp017474485	830.058	471.003	407.569	448.938	357.472	482.106	382.546	450.114	822.737	301.557	180.366	220.538	377.79	349.757	336.249	749.415	443.13	436.564
RGMC.14184	d__Bacteria;p__Bacillota_A;c__Clostridia;o__Lachnospirales;f__Lachnospiraceae;g__CAG-791;s__CAG-791 sp017474455	0	295.459	232.225	0	0	260.931	0	226.67	0	0	0	0	0	0	0	0	0	284.562
RGMC.14267	d__Bacteria;p__Bacillota_A;c__Clostridia;o__Oscillospirales;f__Oscillospiraceae;g__RGIG529;s__RGIG529 sp017420125	132.999	120.617	0	1678.03	1805.32	1366.21	1936.16	1056.84	244.051	0	0	0	0	0	0	934.63	2174.95	2175.59
RGMC.14271	d__Bacteria;p__Bacillota_A;c__Clostridia;o__Lachnospirales;f__Lachnospiraceae;g__Avilachnospira;s__Avilachnospira sp017388745	0	352.056	321.375	0	0	246.791	0	259.029	0	0	0	0	0	0	0	0	0	226.796
RGMC.14303	d__Bacteria;p__Planctomycetota;c__Planctomycetia;o__Pirellulales;f__Thermoguttaceae;g__RUG369;s__RUG369 sp902786505	121.264	0	0	0	0	0	0	0	0	0	0	0	0	0	0	0	0	0
RGMC.14305	d__Bacteria;p__Bacteroidota;c__Bacteroidia;o__Bacteroidales;f__Bacteroidaceae;g__UBA1179;s__UBA1179 sp017530735	615.08	450.853	600.394	287.773	197.121	351.718	370.957	413.525	666.573	349.048	171.293	139.445	243.721	275.288	218.637	598.026	225.855	229.784
RGMC.1431	d__Bacteria;p__Bacteroidota;c__Bacteroidia;o__Bacteroidales;f__Bacteroidaceae;g__Prevotella;s__Prevotella sp016286575	399.41	193.728	198.754	188.395	128.974	192.962	161.449	186.04	345.003	0	0	0	0	0	0	264.287	114.823	116.311
RGMC.14326	d__Bacteria;p__Bacteroidota;c__Bacteroidia;o__Bacteroidales;f__Bacteroidaceae;g__Ga6A1;s__Ga6A1 sp900102385	0	0	0	0	0	0	189.191	0	186.322	0	0	0	0	0	0	0	0	0
RGMC.1434	d__Bacteria;p__Bacteroidota;c__Bacteroidia;o__Bacteroidales;f__F082;g__Limimorpha;s__Limimorpha sp902774295	608.961	253.193	0	519.689	319.151	546.391	580.529	695.197	999.042	217.126	0	0	208.661	199.538	187.976	747.003	333.536	343.597
RGMC.14465	d__Bacteria;p__Bacillota_A;c__Clostridia;o__Peptostreptococcales;f__Anaerovoracaceae;g__RGIG7111;s__RGIG7111 sp030530305	0	0	0	0	0	0	0	0	0	659.682	490.079	509.406	510.708	560.79	427.091	0	248.299	0
RGMC.14486	d__Bacteria;p__Bacillota_A;c__Clostridia;o__Christensenellales;f__Aristaeellaceae;g__UBA2862;s__UBA2862 sp017537105	0	0	186.61	0	0	0	0	163.444	0	423.075	334.92	357.482	245.088	244.358	264.618	0	183.531	180.814
RGMC.14487	d__Bacteria;p__Bacillota_A;c__Clostridia;o__Christensenellales;f__CAG-138;g__UBA3792;s__UBA3792 sp017428025	0	0	0	0	0	0	149	138.332	0	0	227.634	260.6	201.16	204.853	201.428	0	166.194	164.37
RGMC.14492	d__Bacteria;p__Bacillota_A;c__Clostridia;o__Lachnospirales;f__Lachnospiraceae;g__RGIG5612;s__RGIG5612 sp017536965	0	338.947	538.962	0	0	368.738	0	522.82	0	0	0	0	0	0	0	0	0	0
RGMC.14493	d__Bacteria;p__Bacillota_A;c__Clostridia;o__Oscillospirales;f__Oscillospiraceae;g__Limivicinus;s__Limivicinus sp017395085	0	177.888	0	210.288	172.792	242.402	157.835	221.369	0	167.658	188.66	191.723	132.703	158.876	146.484	132.128	213.966	217.76
RGMC.14500	d__Bacteria;p__Bacillota_A;c__Clostridia;o__Eubacteriales;f__Anaerofustaceae;g__RUG14186;s__RUG14186 sp902796565	0	0	133.715	0	0	0	0	0	0	0	0	0	0	0	0	0	0	0
RGMC.14504	d__Bacteria;p__Bacillota_A;c__Clostridia;o__Peptostreptococcales;f__Anaerovoracaceae;g__RUG708;s__	2488.28	8301.07	6612.29	6880.59	6358.52	8564.99	6207.81	10725.6	2988.16	12120.2	10448.4	10687.2	9153.27	9908.2	8631.74	4637.64	8912.34	8795.47
RGMC.14508	d__Bacteria;p__Bacillota_A;c__Clostridia;o__Oscillospirales;f__RGIG577;g__RGIG577;s__RGIG577 sp017513095	861.281	1112.07	992.275	1283.74	827.415	1273.36	1065.68	1678	952.358	1636.47	1393.87	1482.14	1507.17	1713.78	1170.01	904.79	1029.97	1023.71
RGMC.14510	d__Bacteria;p__Bacillota_A;c__Clostridia;o__Saccharofermentanales;f__Saccharofermentanaceae;g__Saccharofermentans;s__Saccharofermentans sp017428155	0	0	0	0	0	0	0	0	0	453.886	234.755	240.368	0	0	195.727	0	0	0
RGMC.14516	d__Bacteria;p__Bacillota_A;c__Clostridia;o__Oscillospirales;f__Oscillospiraceae;g__SIG488;s__SIG488 sp017516005	201.35	185.927	134.603	271.921	246.262	231.075	238.099	244.19	0	330.171	310.577	335.579	300.51	294.944	296.742	210.747	252.604	251.968
RGMC.14527	d__Bacteria;p__Bacillota_A;c__Clostridia;o__Christensenellales;f__Aristaeellaceae;g__Aristaeella;s__Aristaeella sp017512985	0	0	0	0	0	0	0	725.134	0	2208.72	1989.4	2365.01	0	0	1606.79	0	0	0
RGMC.14529	d__Bacteria;p__Bacillota_A;c__Clostridia;o__Christensenellales;f__Aristaeellaceae;g__UBA2862;s__UBA2862 sp017512905	0	0	1550.44	0	0	0	0	0	0	0	0	0	0	0	0	0	0	0
RGMC.14530	d__Bacteria;p__Bacillota_A;c__Clostridia;o__Oscillospirales;f__Ruminococcaceae;g__RGIG5675;s__RGIG5675 sp017512745	0	148.913	327.198	0	0	100.197	0	0	0	0	0	0	0	0	0	0	0	0
RGMC.14536	d__Bacteria;p__Bacillota_A;c__Clostridia;o__Oscillospirales;f__Ruminococcaceae;g__RGIG5675;s__RGIG5675 sp017512745	0	112.9	258.546	0	0	81.7803	0	0	0	0	0	0	0	0	0	0	0	0
RGMC.14543	d__Bacteria;p__Bacillota_I;c__Bacilli_A;o__Erysipelotrichales;f__Erysipelotrichaceae;g__Bulleidia;s__Bulleidia sp017512555	0	149.829	0	445.861	718.472	374.812	750.124	396.474	106.605	791.439	1405.32	1453.65	1427.65	1432.77	1348.31	254.44	697.79	697.595
RGMC.14544	d__Bacteria;p__Bacillota_A;c__Clostridia;o__Peptostreptococcales;f__Anaerovoracaceae;g__RUG14258;s__RUG14258 sp017515705	0	165.261	142.419	111.08	0	171.636	114.586	217.573	0	0	0	0	0	0	0	0	182.456	184.566
RGMC.14548	d__Bacteria;p__Actinomycetota;c__Coriobacteriia;o__Coriobacteriales;f__UMGS124;g__RGIG5691;s__RGIG5691 sp017515595	0	173.302	230.22	127.537	0	173.915	0	216.853	0	0	0	0	0	0	0	0	126.145	126.319
RGMC.14557	d__Bacteria;p__Bacillota_A;c__Clostridia;o__Oscillospirales;f__Oscillospiraceae;g__RGIG5705;s__RGIG5705 sp017515345	0	225.762	211.314	316.283	320.571	304.028	263.645	288.123	0	592.031	550.778	574.429	427.758	427.76	433.284	0	385.472	379.882
RGMC.1456	d__Bacteria;p__Fibrobacterota;c__Fibrobacteria;o__Fibrobacterales;f__Fibrobacteraceae;g__Fibrobacter;s__	252.828	149.877	0	150.405	158.458	140.608	169.092	166.563	273.147	125.541	0	0	146.447	159.223	120.306	209.794	122.167	123.545
RGMC.14575	d__Bacteria;p__Bacillota_I;c__Bacilli_A;o__Erysipelotrichales;f__Erysipelotrichaceae;g__RUG521;s__RUG521 sp017512285	155.669	430.83	603.71	337.309	247.396	462.083	265.304	562.745	193.337	167.209	210.723	220.272	190.326	211.365	199.433	239.811	313.05	309.897
RGMC.14587	d__Bacteria;p__Bacillota_I;c__Bacilli_A;o__Erysipelotrichales;f__Erysipelotrichaceae;g__RUG521;s__RUG521 sp017516045	0	0	116.573	0	0	0	0	0	0	0	0	0	0	0	0	0	0	0
RGMC.14596	d__Bacteria;p__Bacillota_A;c__Clostridia;o__Lachnospirales;f__Lachnospiraceae;g__RGIG5612;s__RGIG5612 sp017511185	0	287.376	444.843	225.082	0	336.417	229.463	506.069	0	0	187.893	0	195.58	247.243	179.938	0	239.055	238.447
RGMC.14597	d__Bacteria;p__Bacillota_A;c__Clostridia;o__Peptostreptococcales;f__Anaerovoracaceae;g__RGIG5755;s__RGIG5755 sp017533915	551.167	1268.56	1544.96	1157.21	1204.97	1362.78	1167.89	1714.75	516.086	1811.37	1847.49	1950.76	1989.72	2191.13	1630.1	778.051	1544.91	1544.38
RGMC.14599	d__Bacteria;p__Bacillota_A;c__Clostridia;o__Eubacteriales;f__Anaerofustaceae;g__RUG14186;s__RUG14186 sp902796565	0	137.776	155.542	0	0	0	0	120.472	0	0	0	0	0	0	0	0	0	0
RGMC.14615	d__Bacteria;p__Bacillota_A;c__Clostridia;o__Saccharofermentanales;f__Saccharofermentanaceae;g__Saccharofermentans;s__Saccharofermentans sp016292215	0	190.018	0	312.839	461.896	267.14	411.678	255.48	0	1137.79	719.088	709.839	526.774	641.959	555.407	256.344	430.332	428.531
RGMC.14630	d__Bacteria;p__Bacillota_A;c__Clostridia;o__Christensenellales;f__Maliibacteriaceae;g__RGIG9107;s__RGIG9107 sp017431145	0	166.18	153.026	0	0	182.783	0	214.83	0	272.752	256.898	245.847	240.364	266.792	217.283	0	155.624	161.743
RGMC.14635	d__Bacteria;p__Bacillota_A;c__Clostridia;o__Oscillospirales;f__Oscillospiraceae;g__Limivicinus;s__Limivicinus sp017395085	0	312.839	267.209	437.419	385.358	432.138	288.954	332.89	149.856	443.49	447.888	461.244	310.856	346.706	370.3	233.313	419.327	413.124
RGMC.1464	d__Bacteria;p__Fibrobacterota;c__Fibrobacteria;o__Fibrobacterales;f__Fibrobacteraceae;g__Fibrobacter;s__Fibrobacter sp002210345	3903.01	2446.27	2345.63	1978.62	1265.93	1921.93	1270.15	1563.59	3701.55	0	0	0	0	0	0	3335.03	1474.3	1446.76
RGMC.14641	d__Bacteria;p__Bacillota_A;c__Clostridia;o__Peptostreptococcales;f__Anaerovoracaceae;g__Eubacterium_B;s__Eubacterium_B sp017515765	0	0	147.666	0	0	0	0	118.842	0	0	0	0	0	0	0	0	0	0
RGMC.14658	d__Bacteria;p__Bacillota_A;c__Clostridia;o__Lachnospirales;f__Lachnospiraceae;g__RGIG5612;s__RGIG5612 sp017511185	252.039	738.544	1027.99	532.804	433.173	727.374	470.571	988.26	282.48	349.159	424.855	440.674	415.889	491.502	401.301	354.696	545.895	535.527
RGMC.14659	d__Bacteria;p__Bacillota_A;c__Clostridia;o__Peptostreptococcales;f__Anaerovoracaceae;g__RUG754;s__RUG754 sp902778565	128.433	398.058	618.805	363.804	367.993	460.034	339.519	549.016	156.592	594.139	559.111	546.4	522.294	540.159	482.482	212.955	434.417	431.202
RGMC.14660	d__Bacteria;p__Bacillota_A;c__Clostridia;o__Christensenellales;f__Aristaeellaceae;g__UBA2862;s__UBA2862 sp017512905	0	796.658	840.693	0	0	0	0	0	0	0	0	0	0	0	0	0	0	0
RGMC.14667	d__Bacteria;p__Bacillota_A;c__Clostridia;o__Lachnospirales;f__Lachnospiraceae;g__Alectryocaccobium;s__Alectryocaccobium sp017433825	0	0	124.715	0	0	0	0	0	0	0	0	0	0	0	0	0	0	0
RGMC.147	d__Bacteria;p__Bacteroidota;c__Bacteroidia;o__Bacteroidales;f__Bacteroidaceae;g__Prevotella;s__Prevotella sp900109055	728.415	450.917	443.591	479.726	381.72	517.102	441.312	478.958	784.784	139.144	132.155	0	193.544	193.342	179.718	810.757	327.862	321.802
RGMC.14708	d__Bacteria;p__Bacillota_A;c__Clostridia;o__Lachnospirales;f__Lachnospiraceae;g__RGIG5612;s__RGIG5612 sp017510065	0	488.052	436.412	524.147	429.569	577.078	427.82	617.631	0	369.589	429.692	418.734	352.209	401.611	366.233	318.684	539.179	532.912
RGMC.14710	d__Bacteria;p__Bacillota_A;c__Clostridia;o__Lachnospirales;f__Lachnospiraceae;g__Alectryocaccobium;s__Alectryocaccobium sp017509985	0	209.547	235.246	214.977	228.074	229.906	199.017	245.462	0	334.069	314.355	308.532	267.209	273.53	253.846	0	280.4	278.429
RGMC.14712	d__Bacteria;p__Bacillota_B;c__Dehalobacteriia;o__UBA4068;f__UBA4068;g__CALXSV01;s__	0	0	0	0	204.552	0	115.094	0	0	1186.22	970.5	912.841	931.505	890.97	738.913	0	90.2837	95.2193
RGMC.14724	d__Bacteria;p__Bacillota_A;c__Clostridia;o__Lachnospirales;f__Lachnospiraceae;g__UBA1267;s__	0	0	0	0	0	0	0	0	0	142.895	126.405	131.461	0	0	119.917	0	0	0
RGMC.14727	d__Bacteria;p__Bacteroidota;c__Bacteroidia;o__Bacteroidales;f__UBA932;g__Cryptobacteroides;s__Cryptobacteroides sp902785575	171.208	0	128.146	0	0	0	0	0	0	0	0	0	0	0	0	0	0	0
RGMC.14734	d__Bacteria;p__Bacteroidota;c__Kapaibacteriia;o__Kapaibacteriales;f__UBA2268;g__JAAYTD01;s__JAAYTD01 sp017428585	1040.86	656.979	212.531	656.079	430.996	893.679	1119.59	1220.5	1132.93	0	104.421	114.312	188.544	255.608	146.599	1198.42	568.595	568.642
RGMC.14737	d__Bacteria;p__Bacillota_A;c__Clostridia;o__Oscillospirales;f__Acutalibacteraceae;g__CAG-177;s__CAG-177 sp902787025	0	0	0	125.864	188.403	123.931	128.634	114.933	0	413.816	519.936	544.666	554.368	534.792	445.804	0	164.681	162.464
RGMC.14744	d__Bacteria;p__Bacillota_A;c__Clostridia;o__Saccharofermentanales;f__Saccharofermentanaceae;g__Saccharofermentans;s__Saccharofermentans sp017509205	1320.69	3045.3	1503.89	3770.87	4163.38	3457.23	2781.18	2715.3	1771.82	4656.9	3687.42	4025.65	2156.58	2336.45	2834.82	2300.91	3602.46	3536.45
RGMC.14748	d__Bacteria;p__Bacillota_A;c__Clostridia;o__Lachnospirales;f__Lachnospiraceae;g__Acetatifactor;s__Acetatifactor sp016290775	592.675	473.999	269.617	663.938	592.885	515.787	581.748	519.579	479.879	741.405	439.101	486.993	421.158	436.177	410.253	594.83	518.414	508.516
RGMC.1476	d__Bacteria;p__Bacteroidota;c__Bacteroidia;o__Bacteroidales;f__Bacteroidaceae;g__Prevotella;s__Prevotella sp902799765	362.228	170.131	159.521	242.248	185.595	239.467	180.603	187.622	356.833	0	0	0	120.345	0	118.845	316.701	157.364	158.163
RGMC.14772	d__Bacteria;p__Bacteroidota;c__Bacteroidia;o__Bacteroidales;f__UBA932;g__Cryptobacteroides;s__Cryptobacteroides sp017519865	417.415	271.492	316.155	254.811	198.782	236.201	210.995	209.232	327.818	253.409	188.395	200.056	169.583	0	174.958	329.932	221.418	215.461
RGMC.14774	d__Bacteria;p__Bacteroidota;c__Bacteroidia;o__Bacteroidales;f__Bacteroidaceae;g__Prevotella;s__Prevotella sp017550455	346.465	171.712	167.802	198.271	146.784	154.554	194.61	175.061	297.385	0	0	0	0	0	125.642	279.309	157.804	156.757
RGMC.14779	d__Bacteria;p__Bacillota_A;c__Clostridia;o__Lachnospirales;f__Lachnospiraceae;g__Moryella;s__Moryella sp902780465	0	1496.1	1471.79	1864.34	2004.38	1786.88	1686.3	2376.13	0	0	1109.57	1509.29	960.549	0	1119.08	0	1630.12	1596.55
RGMC.14780	d__Bacteria;p__Bacillota_A;c__Clostridia;o__Peptostreptococcales;f__Anaerovoracaceae;g__RUG754;s__RUG754 sp902778565	120.768	346.227	556.209	317.511	320.65	407.346	306.172	490.4	141.125	582.521	504.253	487.829	492.047	500.695	441.737	191.555	394.092	398.367
RGMC.14792	d__Bacteria;p__Bacillota_B;c__Dehalobacteriia;o__UBA4068;f__UBA4068;g__HGM13862;s__	0	0	0	0	0	0	0	0	0	591.133	423.525	475.312	285.321	272.912	284.993	0	0	0
RGMC.148	d__Bacteria;p__Bacteroidota;c__Bacteroidia;o__Bacteroidales;f__UBA932;g__Cryptobacteroides;s__Cryptobacteroides sp016287875	148.828	117.862	189.573	0	0	0	0	0	121.598	0	0	0	0	0	0	0	0	0
RGMC.14802	d__Bacteria;p__Bacteroidota;c__Bacteroidia;o__Bacteroidales;f__UBA932;g__Cryptobacteroides;s__	1167.63	680.001	748.674	582.592	436.716	578.885	608.501	708.764	893.77	805.7	599.684	604.029	682.443	719.27	568.013	845.189	540.582	533.221
RGMC.14811	d__Bacteria;p__Planctomycetota;c__Planctomycetia;o__Pirellulales;f__Thermoguttaceae;g__RUG369;s__RUG369 sp902786505	147.158	0	0	0	0	0	0	0	0	0	0	0	0	0	0	0	0	0
RGMC.14830	d__Bacteria;p__Bacillota_A;c__Clostridia;o__Lachnospirales;f__Lachnospiraceae;g__Moryella;s__Moryella sp902780465	0	285.214	356.895	281.904	274.22	298.07	233.629	264.934	0	0	375.015	0	263.993	0	243.103	0	338.42	329.119
RGMC.14850	d__Bacteria;p__Bacteroidota;c__Bacteroidia;o__Bacteroidales;f__UBA4181;g__UBA4181;s__UBA4181 sp017523725	362.815	197.63	204.565	219.22	174.259	177.831	239.838	199.793	349.842	208.22	141.26	0	159.203	157.618	157.368	332.86	182.851	175.029
RGMC.14852	d__Bacteria;p__Bacillota_A;c__Clostridia;o__Christensenellales;f__Christensenellaceae;g__SIG371;s__SIG371 sp017523755	154.177	0	0	287.093	331.218	163.971	461.435	154.349	123.92	714.886	584.862	619.961	551.666	599.214	515.566	292.081	369.636	369.455
RGMC.14858	d__Bacteria;p__Bacteroidota;c__Bacteroidia;o__Bacteroidales;f__UBA932;g__Cryptobacteroides;s__Cryptobacteroides sp902761655	0	0	0	0	152.302	0	155.645	0	0	309.408	236.184	236.66	253.903	261.124	246.953	0	104.361	104.833
RGMC.14914	d__Bacteria;p__Bacteroidota;c__Bacteroidia;o__Bacteroidales;f__Bacteroidaceae;g__UBA1179;s__UBA1179 sp902782245	514.353	325.298	498.957	222.951	184.526	266.997	264.229	258.276	604.952	187.427	0	0	171.08	0	160.712	362.011	175.983	177.201
RGMC.14964	d__Bacteria;p__Spirochaetota;c__Spirochaetia;o__Treponematales;f__Treponemataceae;g__UBA1240;s__UBA1240 sp001603145	0	0	0	0	0	131.062	0	0	120.587	144.406	0	0	0	0	107.465	177.334	0	103.004
RGMC.14966	d__Bacteria;p__Bacteroidota;c__Bacteroidia;o__Bacteroidales;f__UBA1715;g__UBA1715;s__UBA1715 sp017516865	221.575	123.398	0	124.651	0	127.65	139.363	141.017	253.208	0	0	0	103.358	0	101.662	225.684	96.3291	99.091
RGMC.15048	d__Bacteria;p__Bacteroidota;c__Bacteroidia;o__Bacteroidales;f__UBA3663;g__UBA3663;s__	379.018	262.836	303.168	0	0	274.077	238.555	245.703	464.011	0	0	0	0	0	0	340.447	0	0
RGMC.15069	d__Bacteria;p__Desulfobacterota;c__Desulfovibrionia;o__Desulfovibrionales;f__Desulfovibrionaceae;g__Desulfovibrio;s__Desulfovibrio sp016284885	713.775	547.333	0	1001.64	1184.65	896.685	1136.96	924.133	801.742	1794.08	1505.68	1585.82	1220.78	1315.31	1486.6	892.882	1061.96	1067.18
RGMC.15089	d__Bacteria;p__Bacillota_A;c__Clostridia;o__Oscillospirales;f__Oscillospiraceae;g__Limivicinus;s__Limivicinus sp900317375	0	414.663	416.004	506.259	494.335	422.352	392.413	367.961	0	782.186	734.926	756.481	592.782	585.44	573.638	338.809	561.766	556.063
RGMC.1513	d__Bacteria;p__Bacillota_A;c__Clostridia;o__Lachnospirales;f__Lachnospiraceae;g__AC2028;s__	621.435	711.108	842.523	391.574	317.077	440.589	277.466	455.858	566.035	0	0	0	0	0	0	390.011	0	202.556
RGMC.1515	d__Bacteria;p__Bacteroidota;c__Bacteroidia;o__Bacteroidales;f__UBA932;g__Cryptobacteroides;s__Cryptobacteroides sp900321245	125.652	0	118.763	0	0	0	0	0	0	0	0	0	0	0	0	0	0	0
RGMC.15152	d__Bacteria;p__Fibrobacterota;c__Fibrobacteria;o__Fibrobacterales;f__Fibrobacteraceae;g__Fibrobacter;s__Fibrobacter sp017530965	3431.28	1959.39	1751.38	2046.64	2084.62	2143.26	2281.05	1987.52	4003.97	427.274	559.143	564.134	922.352	929.145	825.608	2963.03	1449.83	1447.81
RGMC.15156	d__Bacteria;p__Bacteroidota;c__Bacteroidia;o__Bacteroidales;f__F082;g__Limimorpha;s__Limimorpha sp902801465	0	0	0	214.205	0	0	0	0	0	0	0	0	0	0	0	272.44	177.684	183.166
RGMC.15157	d__Bacteria;p__Bacillota_C;c__Negativicutes;o__Acidaminococcales;f__Acidaminococcaceae;g__Succiniclasticum;s__Succiniclasticum sp017443005	150.951	139.761	174.865	0	0	0	0	109.372	0	0	0	0	0	0	0	0	0	0
RGMC.15159	d__Bacteria;p__Bacteroidota;c__Bacteroidia;o__Bacteroidales;f__Bacteroidaceae;g__UBA1179;s__UBA1179 sp017530735	590.587	422.33	573.3	274.376	188.004	328.454	352.097	395.001	621.773	336.687	166.887	141.375	229.164	273.642	208.647	587.161	226.077	226.917
RGMC.15199	d__Bacteria;p__Bacteroidota;c__Bacteroidia;o__Bacteroidales;f__UBA932;g__RUG11257;s__RUG11257 sp017527625	319.755	199.838	239.595	149.027	0	160.852	0	172.579	321.225	0	0	0	0	0	0	235.488	114.244	112.521
RGMC.15205	d__Bacteria;p__Desulfobacterota;c__Desulfovibrionia;o__Desulfovibrionales;f__Desulfovibrionaceae;g__Desulfovibrio;s__Desulfovibrio sp017528345	1944.37	699.251	0	2086.07	1352.54	1821.64	1933.58	1592.56	2451.12	1438.21	1085.19	1130.5	1086.07	1090.74	1152.09	2255.19	1581.53	1572.85
RGMC.15208	d__Bacteria;p__Spirochaetota;c__Spirochaetia;o__CADAEX01;f__CADAEX01;g__CADAEX01;s__CADAEX01 sp902787125	0	0	0	0	0	0	290.779	0	0	0	0	0	0	0	0	0	0	0
RGMC.15221	d__Bacteria;p__Bacteroidota;c__Bacteroidia;o__Bacteroidales;f__Bacteroidaceae;g__UBA4372;s__UBA4372 sp017427185	212.94	0	0	150.576	0	0	0	0	195.189	0	0	0	0	0	0	243.837	0	0
RGMC.15224	d__Bacteria;p__Bacillota_A;c__Clostridia;o__Christensenellales;f__Christensenellaceae;g__QANA01;s__QANA01 sp017439085	520.714	371.616	137.812	346.714	380.577	351.544	510.008	504.021	443.289	299.751	342.321	359.759	412.896	415.441	358.507	443	392.593	391.99
RGMC.15225	d__Bacteria;p__Bacteroidota;c__Bacteroidia;o__Bacteroidales;f__UBA932;g__Cryptobacteroides;s__Cryptobacteroides sp017527415	3581.6	2559.02	2968.83	2340.73	1773.39	2389.59	2261.96	2477.67	3638.57	1207.16	1374.09	1337.31	1803.42	1914.51	1687.65	3233.66	1971.06	1966.2
RGMC.15226	d__Bacteria;p__Bacteroidota;c__Bacteroidia;o__Bacteroidales;f__SZUA-534;g__RUG13583;s__RUG13583 sp017527435	258.064	181.283	187.373	134.993	0	156.195	169.389	198.566	261.332	0	0	0	0	0	0	237.018	125.579	124.374
RGMC.15227	d__Bacteria;p__Bacillota_A;c__Clostridia;o__Lachnospirales;f__Lachnospiraceae;g__RUG11977;s__RUG11977 sp017427415	0	0	0	0	0	0	0	0	0	558.522	310.36	386.663	479.999	500.693	481.877	0	0	0
RGMC.15236	d__Bacteria;p__Bacteroidota;c__Bacteroidia;o__Bacteroidales;f__UBA932;g__Cryptobacteroides;s__Cryptobacteroides sp900319375	171.634	118.991	122.775	0	0	106.478	0	0	204.255	0	0	0	0	0	0	176.306	0	0
RGMC.15238	d__Bacteria;p__Bacillota_A;c__Clostridia;o__Christensenellales;f__Aristaeellaceae;g__Firm-10;s__Firm-10 sp017527065	0	231.164	156.076	435.5	515.91	347.127	397.875	285.769	0	1589.04	1047.96	1095.62	762.353	699.474	794.041	0	566.545	557.388
RGMC.15243	d__Bacteria;p__Bacillota_A;c__Clostridia;o__Oscillospirales;f__Oscillospiraceae;g__Limivicinus;s__Limivicinus sp017395085	0	219.37	165.534	243.943	229.423	267.752	192.848	237.235	0	242.449	255.167	263.767	184.675	208.521	203.514	0	247.488	262.004
RGMC.15246	d__Bacteria;p__Bacillota_A;c__Clostridia;o__Lachnospirales;f__Lachnospiraceae;g__UBA2868;s__UBA2868 sp017526745	702.416	1271.88	1412.28	1567.22	1840.4	1123.63	1185.53	643.242	661.698	2423.83	1546.16	2247.39	1035.38	781.054	1599.27	846.882	1682.69	1644.97
RGMC.15252	d__Bacteria;p__Bacteroidota;c__Bacteroidia;o__Bacteroidales;f__F082;g__Limimorpha;s__Limimorpha sp902789915	142.013	0	0	0	0	0	0	0	142.674	0	0	0	0	0	0	179.086	0	0
RGMC.15256	d__Bacteria;p__Bacteroidota;c__Bacteroidia;o__Bacteroidales;f__UBA932;g__Cryptobacteroides;s__Cryptobacteroides sp017428725	159.67	0	0	0	0	0	0	0	0	0	0	0	0	0	114.439	0	0	0
RGMC.15257	d__Bacteria;p__Bacillota_A;c__Clostridia;o__Lachnospirales;f__Lachnospiraceae;g__UBA4292;s__UBA4292 sp902790095	0	114.11	0	0	0	0	0	0	0	0	0	0	0	0	0	0	0	0
RGMC.15265	d__Bacteria;p__Bacillota_A;c__Clostridia;o__Christensenellales;f__Christensenellaceae;g__QANA01;s__QANA01 sp017439085	846.928	586.952	0	531.086	589.116	560.607	791.276	796.104	718.633	422.026	491.703	522.806	608.174	615.092	517.64	674.519	573.123	576.068
RGMC.15267	d__Bacteria;p__Bacteroidota;c__Bacteroidia;o__Bacteroidales;f__SZUA-534;g__RUG13583;s__RUG13583 sp017527435	231.088	163.239	166.816	120.257	0	141.137	143.033	173.92	240.292	0	0	0	0	0	0	212.42	111.442	111.369
RGMC.15281	d__Bacteria;p__Bacillota_C;c__Negativicutes;o__Acidaminococcales;f__Acidaminococcaceae;g__Succiniclasticum;s__Succiniclasticum sp017443005	299.983	215.781	247.84	0	0	0	0	0	0	0	0	0	0	0	0	0	0	163.74
RGMC.15283	d__Bacteria;p__Bacteroidota;c__Bacteroidia;o__Bacteroidales;f__Bacteroidaceae;g__UBA4372;s__UBA4372 sp017427185	168.716	0	0	0	0	0	0	0	142.527	0	0	0	0	0	0	185.62	0	0
RGMC.15292	d__Bacteria;p__Bacillota_A;c__Clostridia;o__Oscillospirales;f__Oscillospiraceae;g__Limivicinus;s__Limivicinus sp017535865	1079.29	1260.16	1105.35	1818.64	1438.42	1364.3	1021.25	859.606	789.839	2464.85	3229.51	3602.9	2101.21	1632.09	2850.25	1060.38	1509.97	1499.52
RGMC.15298	d__Bacteria;p__Bacillota_A;c__Clostridia;o__Oscillospirales;f__Oscillospiraceae;g__UBA1774;s__UBA1774 sp017535635	300.287	234.906	143.168	506.45	582.36	359.005	529.474	393.36	237.378	543.604	554.957	558.715	534.252	566.606	445.484	430.963	437.144	438.538
RGMC.15301	d__Bacteria;p__Spirochaetota;c__Spirochaetia;o__CADAEX01;f__CADAEX01;g__CADAEX01;s__CADAEX01 sp017535435	0	0	0	0	326.024	0	424.261	0	0	552.556	328.108	360.565	478.318	487.635	398.369	0	0	0
RGMC.15304	d__Bacteria;p__Bacteroidota;c__Bacteroidia;o__Bacteroidales;f__UBA932;g__Cryptobacteroides;s__	1868.03	1402.85	1711.01	1303.72	1319.09	1365.04	1249.15	1606.8	1191.17	1333.98	1191.73	1184.48	1185.93	1355.81	1002.67	1903.23	1283.86	1301.96
RGMC.15310	d__Bacteria;p__Verrucomicrobiota;c__Lentisphaeria;o__Victivallales;f__UBA1829;g__UBA1732;s__UBA1732 sp017524965	221.347	139.097	0	107.453	0	112.883	121.442	115.481	199.279	0	0	0	0	0	0	113.597	0	0
RGMC.15329	d__Bacteria;p__Bacteroidota;c__Bacteroidia;o__Bacteroidales;f__P3;g__UBA1217;s__UBA1217 sp902788805	281.277	196.997	0	0	0	227.617	0	0	299.934	0	0	0	0	0	0	0	0	0
RGMC.15337	d__Bacteria;p__Bacteroidota;c__Bacteroidia;o__Bacteroidales;f__UBA932;g__Cryptobacteroides;s__Cryptobacteroides sp902761655	0	0	0	0	0	0	0	0	0	191.586	151.529	0	178.823	188.097	172.39	0	0	0
RGMC.15338	d__Bacteria;p__Bacillota_A;c__Clostridia;o__Oscillospirales;f__Ruminococcaceae;g__Ruminococcus;s__Ruminococcus sp017534835	0	0	0	222.764	373.103	161.596	302.562	148.537	0	360.231	793.447	863.51	680.705	830.837	662.673	0	280.971	280.485
RGMC.15350	d__Bacteria;p__Bacteroidota;c__Bacteroidia;o__Bacteroidales;f__WCHB1-69;g__RUG11690;s__RUG11690 sp902771655	5999.75	3585.01	2339.06	2459.36	1371.08	2953.31	2152.83	3139.53	5180.05	886.18	566.816	595.479	896.186	909.164	804.497	4555.09	1968.49	1952.52
RGMC.15357	d__Bacteria;p__Bacteroidota;c__Bacteroidia;o__Bacteroidales;f__SZUA-534;g__RUG13583;s__RUG13583 sp946404125	0	0	0	0	0	0	0	0	146.204	0	0	0	0	0	0	0	0	0
RGMC.1536	d__Bacteria;p__Bacteroidota;c__Bacteroidia;o__Bacteroidales;f__UBA932;g__Cryptobacteroides;s__Cryptobacteroides sp900316525	0	0	0	0	0	0	0	0	0	242.269	206.773	0	0	0	189.548	0	0	0
RGMC.15363	d__Bacteria;p__Bacillota_A;c__Clostridia;o__Oscillospirales;f__CAG-272;g__UBA1740;s__UBA1740 sp946404295	160.168	89.3747	0	232.074	206.228	172.436	379.833	208.388	236.997	130.916	120.96	0	205.497	263.929	172.809	286.936	176.708	171.375
RGMC.15384	d__Bacteria;p__Bacteroidota;c__Bacteroidia;o__Bacteroidales;f__UBA932;g__Bact-11;s__Bact-11 sp002361615	0	0	0	0	0	0	0	179.376	0	353.216	220.261	0	202.352	208.949	197.692	0	239.132	232.934
RGMC.15388	d__Bacteria;p__Bacteroidota;c__Bacteroidia;o__Bacteroidales;f__Paludibacteraceae;g__UBA1723;s__UBA1723 sp002371265	654.736	443.268	356.464	493.218	486.427	547.369	597.444	611.616	796.744	239.841	261.153	250.202	460.548	561.263	409.113	791.798	423.753	414.967
RGMC.15390	d__Bacteria;p__Bacillota_A;c__Clostridia;o__Oscillospirales;f__Oscillospiraceae;g__UBA738;s__UBA738 sp017541825	0	294.831	273.147	329.147	0	351.175	0	347.601	0	0	262.112	0	224.787	0	242.13	0	278.3	284.363
RGMC.15400	d__Bacteria;p__Bacillota_A;c__Clostridia;o__Christensenellales;f__Christensenellaceae;g__QANA01;s__QANA01 sp017439085	500.637	352.808	132.85	343.568	378.416	349.381	462.738	451.665	402.508	308.509	344.565	373.573	433.457	412.748	367.006	417.84	390.245	384.734
RGMC.15412	d__Bacteria;p__Bacillota_A;c__Clostridia;o__Christensenellales;f__Aristaeellaceae;g__RUG563;s__RUG563 sp017541205	793.822	797.74	555.348	989.097	1063.77	784.632	657.706	471.363	0	2278.67	1530.97	1663.69	962.372	826.932	1333.93	789.133	952.328	922.405
RGMC.15415	d__Bacteria;p__Bacteroidota;c__Bacteroidia;o__Bacteroidales;f__Paludibacteraceae;g__RF16;s__RF16 sp900321775	640.316	398.647	458.058	313.332	202.988	332.462	314.653	279.591	604.777	0	0	0	0	0	0	474.819	230.697	228.38
RGMC.15416	d__Bacteria;p__Bacillota_A;c__Clostridia;o__Lachnospirales;f__Lachnospiraceae;g__UBA1712;s__UBA1712 sp902789785	987.53	781.053	603.134	676.713	417.05	651.202	502.587	626.304	981.758	0	0	0	0	0	0	770.302	384.423	378.392
RGMC.15426	d__Bacteria;p__Bacteroidota;c__Bacteroidia;o__Bacteroidales;f__P3;g__UBA1217;s__UBA1217 sp902788805	231.286	155.333	0	0	0	179.294	0	142.887	261.215	0	0	0	0	0	0	0	0	0
RGMC.15428	d__Bacteria;p__Bacteroidota;c__Bacteroidia;o__Bacteroidales;f__Bacteroidaceae;g__Prevotella;s__Prevotella sp902800435	2247.33	1342.5	1307.17	1210.23	993.49	1063.25	1028.01	1067.02	1538.83	609.539	864.063	906.654	847.882	745.527	831.136	1805.65	1040.42	1015.63
RGMC.15433	d__Bacteria;p__Bacillota_A;c__Clostridia;o__Lachnospirales;f__Lachnospiraceae;g__Eubacterium_Q;s__Eubacterium_Q sp900321215	212.092	257.366	257.444	205.542	208.939	208.021	187.672	211.16	269.225	0	0	0	0	0	0	0	0	0
RGMC.15442	d__Bacteria;p__Bacillota_A;c__Clostridia;o__Oscillospirales;f__Oscillospiraceae;g__Alloscillospira;s__Alloscillospira sp017540565	176.481	499.174	772.098	428.746	367.701	492.007	313.577	535.81	175.014	336.377	354.452	366.347	298.496	305.931	291.035	220.728	405.505	401.885
RGMC.15450	d__Bacteria;p__Verrucomicrobiota;c__Lentisphaeria;o__Victivallales;f__UBA1829;g__UBA1732;s__UBA1732 sp017540385	0	0	0	0	0	0	127.835	0	0	198.668	0	0	190.996	161.344	136.04	0	0	0
RGMC.15451	d__Bacteria;p__Bacillota_A;c__Clostridia;o__Lachnospirales;f__Lachnospiraceae;g__UBA1712;s__UBA1712 sp017540355	1029.78	763.321	604.243	648.006	430.969	589.268	431.182	501.837	916.857	0	0	0	169.819	157.842	220.876	937.581	397.897	385.219
RGMC.15459	d__Bacteria;p__Bacillota_A;c__Clostridia;o__Oscillospirales;f__CAG-272;g__UMGS1696;s__UMGS1696 sp902773525	0	0	0	0	169.624	0	0	140.51	0	401.333	321.93	331.131	266.102	283.437	243.384	0	176.78	173.18
RGMC.1546	d__Bacteria;p__Bacteroidota;c__Bacteroidia;o__Bacteroidales;f__UBA3824;g__UBA3824;s__UBA3824 sp017530465	263.83	142.7	0	0	0	138.258	0	142.157	333.902	0	0	0	0	0	0	0	0	0
RGMC.15462	d__Bacteria;p__Bacillota_A;c__Clostridia;o__Lachnospirales;f__Lachnospiraceae;g__RGIG5021;s__RGIG5021 sp017479935	316.376	736.161	729.339	781.901	808.201	731.39	782.545	650.443	324.221	332.759	1160.67	1123.08	852.356	874.079	948.809	593.803	935.89	929.096
RGMC.15465	d__Bacteria;p__Spirochaetota;c__Spirochaetia;o__Sphaerochaetales;f__Sphaerochaetaceae;g__UBA9732;s__UBA9732 sp902781545	0	0	0	147.236	169.292	96.7534	259.618	119.032	165.304	142.202	93.6079	123.604	183.092	177.735	162.405	176.763	126.495	124.531
RGMC.15467	d__Bacteria;p__Bacillota_A;c__Clostridia;o__Peptostreptococcales;f__Anaerovoracaceae;g__RGIG7041;s__	1376.57	917.972	714.724	1288.25	1126.54	1094.55	1587.89	1114.28	889.628	1761.72	1443.58	1232.63	1523.26	1599.91	1199.1	1377.89	1483.77	1461.1
RGMC.15475	d__Bacteria;p__UBP6;c__UBA1177;o__UBA1177;f__UBA1177;g__UBA1177;s__UBA1177 sp002309575	0	0	0	0	914.163	0	506.481	0	0	3657.33	1825.06	2144.54	3202.05	3528.96	2089.03	0	238.372	234.612
RGMC.15479	d__Bacteria;p__Bacillota_A;c__Clostridia;o__Lachnospirales;f__Lachnospiraceae;g__UBA3775;s__UBA3775 sp017437965	0	169.973	216.456	0	0	0	0	144.392	0	0	0	0	0	0	0	0	0	0
RGMC.15486	d__Bacteria;p__Bacillota_A;c__Clostridia;o__Christensenellales;f__Aristaeellaceae;g__SFMI01;s__SFMI01 sp017544935	0	0	0	0	0	0	0	0	0	0	0	0	0	0	0	0	98.4487	0
RGMC.15496	d__Bacteria;p__Bacillota_A;c__Clostridia;o__Oscillospirales;f__Oscillospiraceae;g__RGIG7949;s__RGIG7949 sp016287555	0	0	0	0	0	0	0	0	0	122.659	0	0	0	0	0	0	0	0
RGMC.15507	d__Bacteria;p__Bacteroidota;c__Bacteroidia;o__Bacteroidales;f__UBA932;g__Cryptobacteroides;s__Cryptobacteroides sp946405645	1030.98	643.687	772.99	571.669	485.148	591.635	570.666	616.358	798.416	641.418	480.769	505.596	478.487	488.591	488.17	799.862	526.626	523.415
RGMC.15512	d__Bacteria;p__Chloroflexota;c__Dehalococcoidia;o__Dehalococcoidales;f__UBA1222;g__UBA1222;s__UBA1222 sp016284035	140.126	0	0	133.222	152.758	104.872	238.69	120.353	160.818	0	0	0	178.423	197.733	156.091	206.908	131.118	134.647
RGMC.15518	d__Bacteria;p__Bacteroidota;c__Bacteroidia;o__Bacteroidales;f__Bacteroidaceae;g__Ga6A1;s__Ga6A1 sp900102385	0	0	0	0	0	0	225.489	0	0	0	0	0	0	0	0	0	0	0
RGMC.15521	d__Bacteria;p__Bacillota_A;c__Clostridia;o__Peptostreptococcales;f__Anaerovoracaceae;g__RGIG7041;s__RGIG7041 sp017543805	957.802	661.568	488.378	665.983	546.896	573.788	603.121	588.715	762.156	453.002	452.376	434.759	390.211	420.297	422.306	799.746	647.51	633.725
RGMC.15524	d__Bacteria;p__Bacillota_A;c__Clostridia;o__Lachnospirales;f__Lachnospiraceae;g__RGIG5612;s__RGIG5612 sp017536965	0	0	460.645	0	0	0	0	474.453	0	0	0	0	0	0	0	0	0	0
RGMC.15529	d__Bacteria;p__Bacteroidota;c__Bacteroidia;o__Bacteroidales;f__P3;g__UBA1217;s__UBA1217 sp902788805	240.204	162.519	0	0	0	200.078	0	182.182	260.463	0	0	0	0	0	0	0	0	0
RGMC.15530	d__Bacteria;p__Bacillota_A;c__Clostridia;o__Lachnospirales;f__Lachnospiraceae;g__RGIG3528;s__RGIG3528 sp016283775	0	0	0	0	246.669	0	261.43	0	0	0	0	0	330.182	218.254	281.649	0	276.304	269.96
RGMC.15531	d__Bacteria;p__Bacillota_A;c__Clostridia;o__Oscillospirales;f__Acutalibacteraceae;g__Eubacterium_R;s__Eubacterium_R sp017543415	0	0	0	0	0	0	0	92.2821	0	0	0	0	0	0	0	0	0	0
RGMC.15535	d__Bacteria;p__Bacillota_A;c__Clostridia;o__Lachnospirales;f__Lachnospiraceae;g__UBA1267;s__UBA1267 sp902803345	0	117.697	0	183.048	199.285	163.834	186.56	161.225	0	373.661	311.999	334.143	287.334	316.971	268.356	0	256.488	246.556
RGMC.15539	d__Bacteria;p__Bacteroidota;c__Bacteroidia;o__Bacteroidales;f__Paludibacteraceae;g__RF16;s__RF16 sp900321775	687.332	423.986	473.127	329.545	204.984	347.528	314.697	281.628	643.288	0	0	0	0	0	0	498.858	246.682	234.583
RGMC.15547	d__Bacteria;p__UBA3054;c__UBA3054;o__UBA3054;f__UBA3054;g__UBA3054;s__UBA3054 sp017539325	411.952	0	0	0	0	0	454.696	0	0	567.593	440.487	436.822	539.827	566.49	481.706	464.991	0	329.143
RGMC.15550	d__Bacteria;p__Bacteroidota;c__Bacteroidia;o__Bacteroidales;f__Bacteroidaceae;g__UBA4372;s__UBA4372 sp017427185	189.271	0	0	0	0	0	0	0	0	0	0	0	0	0	0	205.025	0	0
RGMC.15566	d__Bacteria;p__Bacillota_A;c__Clostridia;o__Peptostreptococcales;f__Anaerovoracaceae;g__RGIG7111;s__RGIG7111 sp017538845	0	0	0	168.113	206.347	185.789	0	206.425	0	537.765	434.749	439.096	445.967	498.534	381.418	0	243.725	232.877
RGMC.15591	d__Bacteria;p__Synergistota;c__Synergistia;o__Synergistales;f__Synergistaceae;g__Synergistes;s__Synergistes sp017537925	0	0	0	0	0	0	0	0	0	3058.23	1299.45	1309.48	1345.67	1519.74	1000.35	0	0	0
RGMC.15639	d__Bacteria;p__Bacteroidota;c__Bacteroidia;o__Bacteroidales;f__Bacteroidaceae;g__Ga6A1;s__Ga6A1 sp900102385	193.043	0	0	0	0	0	201.832	0	203.496	0	0	0	0	0	0	193.933	0	0
RGMC.1567	d__Bacteria;p__Bacillota_A;c__Clostridia;o__Lachnospirales;f__Lachnospiraceae;g__UBA2912;s__	0	1539.43	1524.88	0	0	1473.94	0	1442.39	0	1980.07	1459.87	0	0	0	1421.85	0	0	1359.19
RGMC.15671	d__Bacteria;p__Bacillota_A;c__Clostridia;o__Peptostreptococcales;f__Anaerovoracaceae;g__RUG13615;s__	0	173.199	229.177	0	0	180.024	0	175.125	0	0	226.112	0	184.598	0	0	0	0	190.859
RGMC.15694	d__Bacteria;p__Bacteroidota;c__Bacteroidia;o__Bacteroidales;f__UBA932;g__Cryptobacteroides;s__Cryptobacteroides sp902761655	0	0	0	0	0	0	0	0	0	132.86	97.1147	107.712	112.337	118.322	111.641	0	0	0
RGMC.157	d__Bacteria;p__Bacillota_A;c__Clostridia;o__Lachnospirales;f__Lachnospiraceae;g__G11;s__G11 sp900103495	780.585	582.784	539.308	670.886	600.992	592.142	551.434	626.23	664.267	0	0	0	295.839	297.435	292.377	766.547	444.393	442.747
RGMC.15740	d__Bacteria;p__Bacillota_A;c__Clostridia;o__Lachnospirales;f__Lachnospiraceae;g__RUG11977;s__RUG11977 sp016288005	0	0	0	0	0	0	0	0	0	333.879	238.91	0	0	0	0	0	0	0
RGMC.1575	d__Bacteria;p__Bacillota_A;c__Clostridia;o__Peptostreptococcales;f__Anaerovoracaceae;g__UBA3738;s__UBA3738 sp946410475	0	0	129.208	0	0	0	0	0	0	0	0	0	0	0	0	0	0	0
RGMC.15751	d__Bacteria;p__Bacillota_A;c__Clostridia;o__Peptostreptococcales;f__Anaerovoracaceae;g__UBA3738;s__	0	249.939	304.929	0	0	0	0	281.067	0	0	0	0	0	0	0	0	0	0
RGMC.158	d__Bacteria;p__Bacteroidota;c__Bacteroidia;o__Bacteroidales;f__UBA932;g__Cryptobacteroides;s__Cryptobacteroides sp017437825	268.501	0	0	266.633	271.562	170.903	404.577	175.759	215.569	450.63	363.122	454.544	445.245	552.04	437.746	483.387	386.154	392.387
RGMC.15849	d__Bacteria;p__Bacillota_A;c__Clostridia;o__Peptostreptococcales;f__Anaerovoracaceae;g__RUG11894;s__RUG11894 sp017557505	0	149.291	197.174	174.687	212.483	187.359	214.841	243.488	0	448.899	444.407	446.553	417.789	476.895	361.611	0	241.55	251.98
RGMC.15850	d__Bacteria;p__Bacteroidota;c__Bacteroidia;o__Bacteroidales;f__BM520;g__RGIG7150;s__RGIG7150 sp017538085	125.143	0	0	320.003	546.758	222.787	948.897	277.105	233.017	957.79	619.351	608.94	881.3	1135.71	626.117	362.51	441.079	446.127
RGMC.15885	d__Bacteria;p__Bacteroidota;c__Bacteroidia;o__Bacteroidales;f__BM520;g__RGIG7150;s__RGIG7150 sp017538085	0	0	0	243.498	379.372	158.9	605.755	180.054	173.412	715.276	439.451	473.225	585.012	743.835	472.514	286.741	321.402	314.717
RGMC.15890	d__Bacteria;p__Fibrobacterota;c__Fibrobacteria;o__Fibrobacterales;f__Fibrobacteraceae;g__Fibrobacter;s__Fibrobacter succinogenes_P	1521.5	938.011	941.69	698.201	701.114	617.985	845.241	705.902	1241.05	1167.67	593.142	686.542	868.407	977.779	738.638	1257.21	815.39	803.663
RGMC.15891	d__Bacteria;p__Bacteroidota;c__Bacteroidia;o__Bacteroidales;f__Paludibacteraceae;g__UBA1181;s__UBA1181 sp002310215	1133.95	648.123	500.3	704.347	607.411	629.445	881.564	680.395	884.514	2630.16	704.5	792.809	912.086	1086.78	820.565	1104.96	903.024	898.965
RGMC.1595	d__Bacteria;p__Bacillota_A;c__Clostridia;o__Oscillospirales;f__Oscillospiraceae;g__Limivicinus;s__Limivicinus sp900317375	0	360.773	346.678	459.277	451.783	384.885	349.162	349.125	0	633.295	604.31	592.785	466.897	493.837	463.533	276.139	460.399	456.176
RGMC.15961	d__Bacteria;p__Bacteroidota;c__Bacteroidia;o__Bacteroidales;f__Bacteroidaceae;g__Ga6A1;s__Ga6A1 sp900102385	187.18	0	0	0	0	0	194.436	0	204.526	0	0	0	0	0	0	183.028	0	0
RGMC.160	d__Bacteria;p__Bacillota_A;c__Clostridia;o__Oscillospirales;f__CAG-272;g__SIG701;s__SIG701 sp016288155	0	0	0	0	0	0	0	0	0	377.11	214.712	216.079	202.924	210.707	170.772	0	182.533	182.246
RGMC.16038	d__Bacteria;p__Desulfobacterota;c__Desulfovibrionia;o__Desulfovibrionales;f__Desulfovibrionaceae;g__Mailhella;s__Mailhella sp902783285	0	0	0	0	0	0	0	0	0	0	144.54	0	0	0	0	0	0	0
RGMC.16042	d__Bacteria;p__Bacillota_A;c__Clostridia;o__Lachnospirales;f__Lachnospiraceae;g__SIG280;s__	0	0	10868.7	0	0	0	0	0	0	0	0	0	0	0	0	0	0	0
RGMC.16072	d__Bacteria;p__Bacteroidota;c__Bacteroidia;o__Bacteroidales;f__Paludibacteraceae;g__UBA1181;s__UBA1181 sp017551675	997.967	655.828	527.639	668.425	611.933	718.163	1023.73	901.553	1062.93	1189.91	507.71	552.521	800.638	1061	744.726	1133.71	760.467	764.366
RGMC.16073	d__Bacteria;p__Bacillota_A;c__Clostridia;o__Lachnospirales;f__Lachnospiraceae;g__UBA1258;s__UBA1258 sp017553505	370.642	452.19	396.021	466.621	656.389	448.726	635.341	599.492	480.271	0	275.142	0	297.045	367.955	311.327	450.333	305.856	299.605
RGMC.1608	d__Bacteria;p__Bacteroidota;c__Bacteroidia;o__Bacteroidales;f__Bacteroidaceae;g__UBA1179;s__UBA1179 sp902782245	605.708	403.575	585.056	299.428	250.67	342.968	364.322	339.346	705.417	258.26	142.844	159.05	242.471	250.772	219.704	456.181	224.861	223.867
RGMC.16091	d__Bacteria;p__Bacillota_A;c__Clostridia;o__Oscillospirales;f__Acutalibacteraceae;g__Eubacterium_R;s__Eubacterium_R sp017543415	0	587.195	0	0	0	724.332	0	448.368	0	0	421.83	0	425.844	334.678	522.407	0	639.251	630.789
RGMC.16123	d__Bacteria;p__Planctomycetota;c__Planctomycetia;o__Pirellulales;f__Thermoguttaceae;g__RUG695;s__RUG695 sp902766935	0	0	0	0	177.464	0	180.641	0	0	417.57	233.532	226.346	238.089	249.142	200.02	0	0	0
RGMC.16131	d__Bacteria;p__Bacteroidota;c__Bacteroidia;o__Bacteroidales;f__Muribaculaceae;g__RUG14106;s__RUG14106 sp017552595	0	0	231.936	255.346	0	0	0	197.348	0	0	0	0	0	0	0	0	205.578	204.942
RGMC.16133	d__Bacteria;p__Bacteroidota;c__Bacteroidia;o__Bacteroidales;f__Bacteroidaceae;g__Prevotella;s__Prevotella sp017550455	473.047	246.139	234.929	297.601	226.121	239.286	311.961	268.32	447.249	0	137.265	165.486	175.51	173.138	188.286	400.293	219.044	220.623
RGMC.16136	d__Bacteria;p__Bacillota_A;c__Clostridia;o__Christensenellales;f__Aristaeellaceae;g__RUG11272;s__RUG11272 sp017552615	0	0	0	0	0	0	0	0	0	3137.15	2615.85	3024.24	0	0	2307.91	0	0	0
RGMC.16147	d__Bacteria;p__Bacillota_A;c__Clostridia;o__Christensenellales;f__Aristaeellaceae;g__RUG14130;s__RUG14130 sp017552535	254.821	188.025	0	285.819	329.486	248.487	278.163	227.983	192.399	714.494	567.373	548.565	473.464	506.399	452.731	273.646	311.187	310.292
RGMC.16157	d__Bacteria;p__Bacillota_A;c__Clostridia;o__Lachnospirales;f__Lachnospiraceae;g__UBA1267;s__UBA1267 sp002308115	0	0	0	0	0	0	0	0	0	127.848	108.336	0	0	0	105.658	0	0	0
RGMC.16159	d__Bacteria;p__Bacteroidota;c__Bacteroidia;o__Bacteroidales;f__UBA3824;g__UBA3824;s__	766.731	415.894	384.005	363.131	329.705	401.481	425.438	425.643	952.261	158.328	0	119.799	221.362	160.516	121.683	456.104	330.044	318.829
RGMC.16164	d__Bacteria;p__Bacillota_I;c__Bacilli_A;o__Erysipelotrichales;f__Erysipelotrichaceae;g__UBA636;s__UBA636 sp017620435	143.129	97.7875	0	120.811	116.986	134.584	169.959	144.26	153.449	127.362	0	0	113.32	134.871	102.383	153.943	112.669	113.385
RGMC.16182	d__Bacteria;p__Bacteroidota;c__Bacteroidia;o__Bacteroidales;f__Muribaculaceae;g__Sodaliphilus;s__Sodaliphilus sp017619935	441.976	339.893	328.458	293.544	211.952	314.707	212.875	283.475	329.743	0	0	0	0	0	134.938	303.375	243.153	233.395
RGMC.16188	d__Bacteria;p__Bacillota_I;c__Bacilli_A;o__RFN20;f__CAG-826;g__RUG13091;s__RUG13091 sp017619815	0	0	0	251.345	373.038	0	558.772	0	0	262.894	262.519	254.378	472.119	564.636	415.779	300.327	262.834	276.318
RGMC.16201	d__Bacteria;p__Bacillota_A;c__Clostridia;o__Lachnospirales;f__Lachnospiraceae;g__UBA1258;s__UBA1258 sp017553505	292.028	378.829	386.871	419.69	594.731	350.498	458.794	420.133	350.108	167.438	262.648	209.443	237.86	281.399	292.55	358.96	271.706	272.995
RGMC.16210	d__Bacteria;p__Bacillota_A;c__Clostridia;o__Lachnospirales;f__Lachnospiraceae;g__XBB1006;s__XBB1006 sp016283755	544.471	111.255	0	1137.47	669.117	890.653	1648.62	947.618	717.133	0	0	134.526	209.039	245.654	169.063	1496.83	1082.8	1084.42
RGMC.16227	d__Bacteria;p__Bacteroidota;c__Bacteroidia;o__Bacteroidales;f__BM520;g__RGIG7150;s__RGIG7150 sp017538085	117.984	0	0	279.195	426.934	185.425	689.217	225.556	213.681	744.41	450.758	468.904	634.523	816.016	499.541	297.271	328.837	338.311
RGMC.16249	d__Bacteria;p__Bacillota_A;c__Clostridia;o__Oscillospirales;f__Oscillospiraceae;g__UBA1774;s__UBA1774 sp017617795	0	143.029	0	195.038	232.956	175.134	199.936	198.953	0	359.322	329.371	314.081	284.992	316.589	262.609	0	189.036	194.529
RGMC.16279	d__Bacteria;p__Bacillota_A;c__Clostridia;o__Lachnospirales;f__Lachnospiraceae;g__UBA1258;s__UBA1258 sp017553505	2614.3	1567.84	1016.14	2171.7	1754.12	1530.4	1338.7	822.254	2341.33	611.624	800.788	722.139	1085.88	675.259	1416.37	3278.47	1411.89	1400.46
RGMC.16303	d__Bacteria;p__Bacillota_A;c__Clostridia;o__Lachnospirales;f__Lachnospiraceae;g__RUG11977;s__	650.298	437.844	248.43	627.402	665.495	450.516	699.373	412.131	646.239	1376.24	968.838	873.454	1146.79	1006.15	1149.81	975.06	515.695	501.923
RGMC.16314	d__Bacteria;p__Bacteroidota;c__Bacteroidia;o__Bacteroidales;f__Paludibacteraceae;g__UBA1181;s__UBA1181 sp017551675	836.309	546.804	449.214	553.125	508.763	603.894	868.193	784.391	889.691	996.503	424.229	466.324	680.192	922.538	629.191	956.32	648.086	639.477
RGMC.16358	d__Bacteria;p__Spirochaetota;c__Spirochaetia;o__Sphaerochaetales;f__Sphaerochaetaceae;g__UBA9732;s__UBA9732 sp017614625	0	0	0	0	0	0	165.535	0	120.687	0	0	0	0	0	0	0	0	0
RGMC.16360	d__Bacteria;p__Spirochaetota;c__Spirochaetia;o__Treponematales;f__Treponemataceae;g__Treponema_D;s__Treponema_D sp017614655	184.761	135.278	0	0	0	139.613	183.134	143.7	195.977	0	0	0	125.322	152.541	138.678	225.872	144.883	145.159
RGMC.16363	d__Bacteria;p__Bacillota_A;c__Clostridia;o__Lachnospirales;f__Lachnospiraceae;g__RUG842;s__	0	166.267	0	415.325	0	377.394	0	316.472	0	0	0	0	0	0	0	178.576	493.501	479.875
RGMC.16377	d__Bacteria;p__Bacillota_I;c__Bacilli_A;o__Erysipelotrichales;f__Erysipelotrichaceae;g__UBA636;s__UBA636 sp017614055	0	0	0	0	0	0	0	110.764	0	150.539	0	0	0	0	0	0	0	0
RGMC.16379	d__Bacteria;p__Bacteroidota;c__Bacteroidia;o__Bacteroidales;f__Paludibacteraceae;g__RF16;s__RF16 sp002310195	2077.53	1023.13	901.347	1159.23	964.66	1112.84	1389.89	1467.27	1821.08	526.485	541.138	565.424	792.281	976.603	701.196	1750.13	966.124	992.606
RGMC.16429	d__Bacteria;p__Bacillota_A;c__Clostridia;o__Oscillospirales;f__Ruminococcaceae;g__RGIG1955;s__RGIG1955 sp017400345	8067.39	3632.89	2482.92	8110.93	10403.5	5658.07	8895.12	4088.53	5487.54	15864.1	11792.5	13776.3	13568.9	11182.5	13233.8	8848.96	10636.8	10364.8
RGMC.16477	d__Bacteria;p__Desulfobacterota;c__Desulfovibrionia;o__Desulfovibrionales;f__Desulfovibrionaceae;g__Desulfovibrio;s__Desulfovibrio desulfuricans_D	469.78	213.364	148.608	258.38	247.495	252.782	272.4	294.161	302.279	0	229.922	175.782	215.017	207.783	184.948	286.646	231.306	230.019
RGMC.1655	d__Bacteria;p__Bacillota_A;c__Clostridia;o__Lachnospirales;f__Lachnospiraceae;g__CAMNLO01;s__	0	0	1924.4	0	0	0	0	0	0	0	1027.84	0	1068.15	0	0	0	1049.07	1038.71
RGMC.166	d__Bacteria;p__Bacillota_I;c__Bacilli_A;o__Erysipelotrichales;f__Erysipelotrichaceae;g__Bulleidia;s__Bulleidia sp017404505	0	726.366	541.11	647.254	624.604	806.634	503.556	765.117	296.826	624.581	923.078	939.431	688.782	738.166	836.547	388.171	709.075	694.333
RGMC.1666	d__Bacteria;p__Bacteroidota;c__Bacteroidia;o__Bacteroidales;f__Bacteroidaceae;g__Ga6A1;s__Ga6A1 sp900102385	0	0	0	0	0	0	191.749	0	0	0	0	0	0	0	0	0	0	0
RGMC.16742	d__Bacteria;p__Bacillota_A;c__Clostridia;o__Lachnospirales;f__Lachnospiraceae;g__CAG-411;s__CAG-411 sp902795895	0	0	0	0	0	0	0	0	0	0	253.331	0	0	0	0	0	0	0
RGMC.1675	d__Bacteria;p__Bacteroidota;c__Bacteroidia;o__Bacteroidales;f__UBA932;g__Bact-11;s__	789.631	535.583	532.322	501.848	479.555	492.345	611.265	550.337	718.188	518.175	488.161	447.408	576.846	638.533	520.773	679.583	435.97	420.929
RGMC.16785	d__Bacteria;p__Bacteroidota;c__Bacteroidia;o__Bacteroidales;f__Bacteroidaceae;g__UBA4372;s__UBA4372 sp900318115	322.651	177.179	152.464	209.78	0	181.458	176.299	145.741	241.374	0	0	0	0	0	0	278.369	0	150.006
RGMC.16802	d__Bacteria;p__Bacillota_A;c__Clostridia;o__Lachnospirales;f__Lachnospiraceae;g__Butyrivibrio;s__Butyrivibrio sp017940685	1687.61	1099.11	926.932	1111.99	0	1058.83	1155.76	1120.05	2025.32	0	0	0	0	0	0	1609.34	0	0
RGMC.16803	d__Bacteria;p__Bacillota_A;c__Clostridia;o__Oscillospirales;f__Oscillospiraceae;g__Limivicinus;s__Limivicinus sp017395085	0	171.688	0	220.758	197.935	252.75	173.888	230.447	0	0	217.203	207.91	0	0	161.851	0	215.129	217.971
RGMC.1681	d__Bacteria;p__Bacteroidota;c__Bacteroidia;o__Bacteroidales;f__ML635J-15;g__Bact-19;s__Bact-19 sp902791865	0	0	0	0	0	0	0	0	0	0	260.959	275.688	424.281	491.909	381.098	0	0	0
RGMC.16815	d__Bacteria;p__Bacillota_A;c__Clostridia;o__Lachnospirales;f__Lachnospiraceae;g__AC2028;s__AC2028 sp017940415	1662.75	3149.42	3390.54	2020.05	1875.89	1976.27	1359.43	1729.22	1674.96	982.706	661.977	756.972	554.937	504.706	632.589	1281.36	1135.69	1121.31
RGMC.16854	d__Bacteria;p__Bacteroidota;c__Bacteroidia;o__Bacteroidales;f__UBA932;g__Cryptobacteroides;s__Cryptobacteroides sp017400135	1183.67	645.517	737.161	703.023	0	646.275	615.279	526.83	890.7	1018.64	574.366	648.237	558.737	543.489	567.94	1042.36	769.53	767.676
RGMC.16901	d__Bacteria;p__Bacillota_A;c__Clostridia;o__Oscillospirales;f__Ruminococcaceae;g__RUG11783;s__RUG11783 sp902772615	350.146	496.905	597.019	490.572	375.448	577.286	361.439	601.628	282.783	545.638	501.561	529.109	469.01	416.013	440.716	331.919	451.597	444.9
RGMC.1691	d__Bacteria;p__Spirochaetota;c__Spirochaetia;o__Sphaerochaetales;f__Sphaerochaetaceae;g__UBA9732;s__UBA9732 sp902796335	249.278	148.701	0	546.047	553.684	333.515	962.977	297.18	529.525	492.031	350.836	430.213	626.571	557.243	567.16	640.115	491.328	484.322
RGMC.16926	d__Bacteria;p__Bacteroidota;c__Bacteroidia;o__Bacteroidales;f__WCHB1-69;g__F23-D06;s__F23-D06 sp017395245	0	0	0	254.806	1229.25	0	651.125	0	0	1317.84	1174.45	1200.73	1450.38	1248.87	1426.35	0	332.766	323.072
RGMC.16945	d__Archaea;p__Halobacteriota;c__Methanomicrobia;o__Methanomicrobiales;f__Methanomicrobiaceae;g__Methanomicrobium;s__Methanomicrobium sp017412625	2970.3	843.164	772.893	510.623	639.49	0	1047.68	1579.41	1361.48	1367.6	733.569	781.19	1258.11	1528.35	728.162	1917.31	1471.54	1438.01
RGMC.17	d__Bacteria;p__Bacillota_A;c__Clostridia;o__Peptostreptococcales;f__Anaerovoracaceae;g__UBA3871;s__UBA3871 sp016280485	828.414	490.592	231.747	1137.25	1293.88	924.744	1767.41	927.682	853.613	941.937	660.851	726.499	876.425	951.56	672.793	1158.13	1618.19	1603.94
RGMC.1701	d__Bacteria;p__Synergistota;c__Synergistia;o__Synergistales;f__Aminobacteriaceae;g__JAFUYV01;s__JAFUYV01 sp016280565	1030.35	661.388	724.168	542.281	483.176	535.221	554.452	540.39	767.764	810.194	498.759	510.209	483.334	479.89	453.482	826.038	640.285	638.541
RGMC.1704	d__Bacteria;p__Bacteroidota;c__Bacteroidia;o__Bacteroidales;f__UBA932;g__RUG11257;s__RUG11257 sp016290415	222.226	146.843	177.213	154.214	164.278	147.267	160.732	149.029	195.431	0	105.392	0	129.258	0	114.139	230.146	150.978	152.127
RGMC.17044	d__Bacteria;p__Bacillota_I;c__Bacilli_A;o__RF39;f__UBA660;g__RGIG9169;s__RGIG9169 sp017934595	1998.54	1730.6	1921.12	790.933	478.271	1161.35	432.447	1037.02	1645.87	0	0	0	0	0	0	943.385	286.147	282.456
RGMC.17047	d__Bacteria;p__Bacillota_A;c__Clostridia;o__Oscillospirales;f__Oscillospiraceae;g__Limivicinus;s__Limivicinus sp017395085	0	356.516	0	507.008	425.259	461.408	356.74	383.623	0	488.728	526.386	566.614	377.791	412.731	427.091	0	497.664	500.203
RGMC.17049	d__Bacteria;p__Bacteroidota;c__Bacteroidia;o__Bacteroidales;f__Bacteroidaceae;g__Ga6A1;s__Ga6A1 sp900102385	0	0	0	0	0	0	269.135	0	0	0	0	0	0	0	0	0	0	0
RGMC.17103	d__Bacteria;p__Bacillota_A;c__Clostridia;o__Lachnospirales;f__Lachnospiraceae;g__Butyrivibrio;s__Butyrivibrio sp017634825	2791.8	1840.3	1557.84	0	0	0	0	0	3728.6	0	0	0	0	0	0	0	0	0
RGMC.17118	d__Bacteria;p__Spirochaetota;c__Spirochaetia;o__Sphaerochaetales;f__Sphaerochaetaceae;g__UBA9732;s__UBA9732 sp902781545	0	0	0	0	0	0	173.583	0	119.991	0	0	0	119.901	0	105.497	126.694	0	0
RGMC.1713	d__Bacteria;p__Bacillota_A;c__Clostridia;o__Lachnospirales;f__Lachnospiraceae;g__RGIG5612;s__RGIG5612 sp017511185	278.553	808.334	1104.98	595.26	509.006	839.964	569.345	1210.44	302.155	412.041	495.856	494.316	506.362	647.766	482.575	390.961	612.366	608.427
RGMC.17147	d__Archaea;p__Methanobacteriota;c__Methanobacteria;o__Methanobacteriales;f__Methanobacteriaceae;g__Methanobrevibacter;s__Methanobrevibacter sp017646885	0	0	0	0	0	734.646	0	829.15	0	0	0	0	0	0	0	0	0	0
RGMC.17160	d__Bacteria;p__Pseudomonadota;c__Gammaproteobacteria;o__Enterobacterales;f__Succinivibrionaceae;g__UBA2804;s__UBA2804 sp900319705	0	0	111.245	0	0	0	0	0	0	0	0	0	0	0	0	0	0	0
RGMC.17167	d__Bacteria;p__Spirochaetota;c__Spirochaetia;o__Sphaerochaetales;f__Sphaerochaetaceae;g__UBA9732;s__UBA9732 sp017632495	0	0	0	0	0	0	458.485	0	650.579	0	0	0	0	0	0	0	0	0
RGMC.17192	d__Archaea;p__Halobacteriota;c__Methanomicrobia;o__Methanomicrobiales;f__Methanomicrobiaceae;g__Methanomicrobium;s__Methanomicrobium sp017412625	1484.71	655.897	720.026	369.772	534.126	0	724.359	1060.43	1630.31	965.026	347.821	430.442	618.596	592.408	430.623	981.38	665.35	671.1
RGMC.17237	d__Bacteria;p__Bacteroidota;c__Bacteroidia;o__Bacteroidales;f__Bacteroidaceae;g__Prevotella;s__Prevotella sp902801155	339.502	240.107	185.3	271.99	292.055	356.643	416.493	311.255	417.806	0	0	240.224	317.783	271.211	297.411	598.903	346.465	339.272
RGMC.17245	d__Bacteria;p__Bacteroidota;c__Bacteroidia;o__Bacteroidales;f__Paludibacteraceae;g__RF16;s__RF16 sp017394705	619.155	353.353	378.031	259.638	162.888	258.105	267.982	301.086	578.88	0	0	0	135.686	119.249	111.556	491.717	218.356	203.024
RGMC.17259	d__Archaea;p__Methanobacteriota;c__Methanobacteria;o__Methanobacteriales;f__Methanobacteriaceae;g__Methanobrevibacter;s__Methanobrevibacter sp017646885	0	0	0	0	0	0	0	845.285	0	0	0	0	0	0	0	0	0	0
RGMC.17265	d__Bacteria;p__Spirochaetota;c__Spirochaetia;o__Sphaerochaetales;f__Sphaerochaetaceae;g__UBA9732;s__UBA9732 sp902781545	0	0	0	0	0	0	165.258	0	113.067	0	0	0	108.763	0	99.6363	117.192	0	0
RGMC.1730	d__Bacteria;p__Bacillota_A;c__Clostridia;o__Oscillospirales;f__Oscillospiraceae;g__UBA1774;s__UBA1774 sp902795345	0	0	0	0	0	0	0	0	0	239.445	208.129	0	0	0	176.543	0	162.955	156.652
RGMC.17332	d__Bacteria;p__Bacillota_A;c__Clostridia;o__Christensenellales;f__Aristaeellaceae;g__RUG14130;s__RUG14130 sp017552535	591.317	385.72	0	608.763	680.121	489.57	523.049	387.978	450.61	1411.53	1035.49	1063.53	826.873	795.45	879.78	604.025	616.559	621.975
RGMC.17353	d__Bacteria;p__Bacillota_A;c__Clostridia;o__Lachnospirales;f__Lachnospiraceae;g__Eubacterium_F;s__Eubacterium_F sp017445525	0	0	150.684	0	0	0	0	0	147.757	0	0	0	0	0	0	0	0	0
RGMC.17360	d__Bacteria;p__Bacillota_A;c__Clostridia;o__Eubacteriales;f__Anaerofustaceae;g__RUG14186;s__RUG14186 sp902796565	0	0	121.955	0	0	0	0	0	0	0	0	0	0	0	0	0	0	0
RGMC.17370	d__Bacteria;p__Bacillota_A;c__Clostridia;o__Peptostreptococcales;f__Anaerovoracaceae;g__RUG754;s__RUG754 sp017394515	300.645	816.475	1240.4	857.494	878.014	1063.6	819.158	1183.44	394.95	1212.73	1102.46	1101.77	1001.92	1096.63	973.889	510.418	1021.68	1004.64
RGMC.17378	d__Bacteria;p__Bacteroidota;c__Bacteroidia;o__Bacteroidales;f__Paludibacteraceae;g__UBA1723;s__UBA1723 sp002371265	519.148	358.95	283.458	399.097	399.426	440.848	491.478	499.617	644.065	0	209.037	0	370.932	462.409	329.328	628.773	334.133	328.677
RGMC.17383	d__Bacteria;p__Bacillota_I;c__Bacilli_A;o__RFN20;f__CAG-826;g__RGIG9670;s__RGIG9670 sp017651565	641.984	321.707	0	607.902	666.499	613.962	834.707	616.986	731.718	369.47	257.405	261.634	503.444	549.224	523.389	1041.58	618.199	621.548
RGMC.174	d__Bacteria;p__UBP6;c__UBA1177;o__UBA1177;f__UBA1177;g__UBA1177;s__UBA1177 sp002309575	0	0	0	0	687.089	0	395.264	0	0	2553.66	1294.2	1519.41	2377.95	2737.69	1525.36	0	181.082	177.322
RGMC.17404	d__Bacteria;p__Spirochaetota;c__Spirochaetia;o__Treponematales;f__Treponemataceae;g__Treponema_D;s__Treponema_D sp017651065	0	0	0	0	0	0	0	0	0	248.963	0	0	0	0	161.479	0	0	0
RGMC.17409	d__Bacteria;p__Bacteroidota;c__Bacteroidia;o__Bacteroidales;f__Paludibacteraceae;g__RF16;s__RF16 sp900321775	440.751	256.875	284.218	0	0	0	0	0	413.103	0	0	0	0	0	0	0	0	0
RGMC.1741	d__Bacteria;p__Bacillota_A;c__Clostridia;o__Oscillospirales;f__Ruminococcaceae;g__Huintestinicola;s__Huintestinicola sp017394475	0	0	142.959	0	0	0	0	0	0	0	0	0	0	0	0	0	0	0
RGMC.17429	d__Bacteria;p__Bacteroidota;c__Bacteroidia;o__Bacteroidales;f__ML635J-15;g__Bact-19;s__	0	0	0	0	0	0	0	0	0	1012.59	981.687	1141.47	1598.67	1714.11	1562.58	0	0	0
RGMC.17448	d__Bacteria;p__Bacteroidota;c__Bacteroidia;o__Bacteroidales;f__Paludibacteraceae;g__RF16;s__RF16 sp002310195	4682.58	2332.78	1983.01	2829.5	2162.86	2623.58	2782.43	2813.96	4472.04	1156.32	1052.46	1256.84	1432.72	1617.56	1445.79	4277.46	2392.36	2380.27
RGMC.17450	d__Bacteria;p__UBA3054;c__UBA3054;o__UBA3054;f__UBA3054;g__UBA3054;s__UBA3054 sp002366995	741.433	348.864	186.337	539.973	631.748	404.886	751.821	484.914	699.142	893.935	735.823	729.465	860.629	884.856	822.132	809.742	580.569	582.178
RGMC.17452	d__Bacteria;p__Bacteroidota;c__Bacteroidia;o__Bacteroidales;f__Paludibacteraceae;g__UBA1723;s__UBA1723 sp002371265	725.031	477.696	392.652	538.208	511.858	586.992	654.76	662.17	865.935	249.807	275.295	257.964	491.167	590.068	433.609	873.692	448.499	438.73
RGMC.17463	d__Bacteria;p__Armatimonadota;c__UBA5829;o__UBA5829;f__UBA5829;g__RGIG10368;s__RGIG10368 sp017958015	0	0	0	154.271	0	135	0	0	0	0	0	0	0	0	0	0	155.007	163.616
RGMC.17464	d__Bacteria;p__Bacteroidota;c__Bacteroidia;o__Bacteroidales;f__Muribaculaceae;g__RUG14106;s__RUG14106 sp017552595	0	0	139.941	163.863	138.773	99.6954	154.562	137.611	0	0	0	0	121.048	129.42	99.2488	148.986	123.289	125.282
RGMC.17494	d__Bacteria;p__Bacteroidota;c__Bacteroidia;o__Bacteroidales;f__UBA3824;g__UBA3824;s__UBA3824 sp017394445	491.187	336.428	312.436	257.101	265.832	289.745	329.572	336.239	601.98	226.657	0	0	206.184	181.551	137.834	366.075	239.672	238.05
RGMC.17514	d__Archaea;p__Methanobacteriota;c__Methanobacteria;o__Methanobacteriales;f__Methanobacteriaceae;g__Methanobrevibacter;s__Methanobrevibacter sp017646885	0	0	0	0	0	706.315	0	887.557	0	0	0	0	0	0	0	0	0	0
RGMC.17606	d__Bacteria;p__Bacillota_A;c__Clostridia;o__Peptostreptococcales;f__Anaerovoracaceae;g__RGIG2707;s__RGIG2707 sp017417045	0	262.832	275.575	0	0	236.145	316.254	264.645	0	0	0	0	0	0	0	0	280.683	275.704
RGMC.17610	d__Bacteria;p__Spirochaetota;c__Spirochaetia;o__Treponematales;f__Treponemataceae;g__UBA1240;s__UBA1240 sp001603145	138.822	0	0	0	0	150.775	160.405	128.246	140.57	164.044	0	0	146.662	171.052	126.951	221.263	125.996	129.165
RGMC.17673	d__Bacteria;p__Bacteroidota;c__Bacteroidia;o__Bacteroidales;f__UBA932;g__Cryptobacteroides;s__Cryptobacteroides sp900316245	194.89	124.012	185.163	0	0	0	0	0	194.684	0	0	0	0	0	0	0	0	0
RGMC.1769	d__Bacteria;p__Bacteroidota;c__Bacteroidia;o__Bacteroidales;f__Muribaculaceae;g__RUG14106;s__RUG14106 sp017552595	0	102.478	177.386	244.092	194.71	138.377	217.032	178.347	176.558	173.272	106.995	155.651	172.383	178.162	156.381	237.633	175.393	173.298
RGMC.1770	d__Bacteria;p__Bacillota_A;c__Clostridia;o__Lachnospirales;f__Lachnospiraceae;g__RGIG3528;s__RGIG3528 sp016283775	0	0	0	0	0	0	0	0	0	0	0	0	181.015	0	134.831	0	0	0
RGMC.17734	d__Bacteria;p__Bacteroidota;c__Bacteroidia;o__Bacteroidales;f__Paludibacteraceae;g__RF16;s__RF16 sp900321775	659.849	410.151	484.286	331.523	221.326	373.817	361.818	340.978	639.741	0	0	0	0	0	0	484.395	232.341	237.525
RGMC.17755	d__Bacteria;p__Verrucomicrobiota;c__Lentisphaeria;o__Victivallales;f__UBA1829;g__UBA11452;s__UBA11452 sp015061565	0	0	0	0	199.278	0	231.553	0	0	365.973	0	0	246.095	0	185.981	206.262	165.386	162.993
RGMC.17787	d__Bacteria;p__Desulfobacterota;c__Desulfovibrionia;o__Desulfovibrionales;f__Desulfovibrionaceae;g__Desulfovibrio;s__Desulfovibrio desulfuricans_D	1240.4	611.57	714.078	642.571	588.78	627.495	758.611	760.061	777.672	599.16	580.745	505.553	595.353	662.627	472.734	885.683	646.148	635.834
RGMC.1780	d__Bacteria;p__Myxococcota;c__Bradymonadia;o__UBA7976;f__UBA1532;g__UBA1238;s__UBA1238 sp002309015	419.855	0	0	763.822	1145.53	429.232	1051.08	304.259	435.951	898.248	689.44	792.534	999.523	1006.73	1018.79	839.717	787.577	779.868
RGMC.17800	d__Bacteria;p__Bacillota_A;c__Clostridia;o__Lachnospirales;f__Lachnospiraceae;g__Oribacterium;s__Oribacterium sp002371295	1598.41	3724.19	4478.74	3924.35	5191.25	4587.43	2606.79	2336.03	0	0	2103.02	0	0	0	0	0	3416.02	3373.57
RGMC.17810	d__Bacteria;p__Actinomycetota;c__Coriobacteriia;o__Coriobacteriales;f__Eggerthellaceae;g__SIG42;s__SIG42 sp015062605	0	0	136.144	0	0	149.874	0	170.626	0	0	0	0	0	0	0	0	0	0
RGMC.17816	d__Bacteria;p__Actinomycetota;c__Coriobacteriia;o__Coriobacteriales;f__Eggerthellaceae;g__UBA9715;s__UBA9715 sp015062685	0	0	1184.52	0	0	0	0	0	0	0	0	0	0	0	0	0	0	0
RGMC.1782	d__Bacteria;p__Bacillota_A;c__Clostridia;o__Peptostreptococcales;f__Anaerovoracaceae;g__Lentihominibacter;s__Lentihominibacter sp002310095	3643.2	6396.97	5967.19	8277.54	8059.17	8504.87	8447.79	10997.2	3749.17	7752.54	10336.5	9931.76	10579.6	12091.8	9821.09	5378.28	11012.7	10840.9
RGMC.17821	d__Archaea;p__Methanobacteriota;c__Methanobacteria;o__Methanobacteriales;f__Methanobacteriaceae;g__Methanosphaera;s__Methanosphaera stadtmanae_C	0	0	0	0	0	0	0	0	0	0	566.823	572.609	698.738	0	575.79	0	0	0
RGMC.17834	d__Archaea;p__Methanobacteriota;c__Methanobacteria;o__Methanobacteriales;f__Methanobacteriaceae;g__Methanobrevibacter;s__Methanobrevibacter olleyae_A	0	0	0	0	0	0	0	1352.44	0	0	0	0	0	0	0	0	0	0
RGMC.17841	d__Bacteria;p__Bacillota_A;c__Clostridia;o__Lachnospirales;f__Lachnospiraceae;g__SIG280;s__SIG280 sp015058015	0	0	7105.38	0	0	0	0	0	0	0	0	0	0	0	0	0	0	0
RGMC.17859	d__Bacteria;p__Bacillota_A;c__Clostridia;o__Peptostreptococcales;f__Anaerovoracaceae;g__RUG099;s__RUG099 sp015058065	0	0	0	0	0	0	0	0	0	226.689	162.118	168.993	136.417	136.244	138.979	0	0	0
RGMC.17880	d__Bacteria;p__Bacillota_A;c__Clostridia;o__Peptostreptococcales;f__Anaerovoracaceae;g__RUG754;s__RUG754 sp902778565	126.652	406.67	635.967	364.005	353.8	456.169	338.997	544.386	152.063	630.637	574.967	554.699	540.301	561.673	495.241	217.301	440.362	444.249
RGMC.17911	d__Bacteria;p__Bacillota_A;c__Clostridia;o__Peptostreptococcales;f__Anaerovoracaceae;g__Lentihominibacter;s__Lentihominibacter sp015058145	0	677.926	547.777	740.743	773.941	852.66	695.745	1001.25	0	1620.08	1458.13	1536.6	1231	1404.64	1225.86	475.112	1071.39	1057.62
RGMC.17943	d__Bacteria;p__Bacillota_A;c__Clostridia;o__Peptostreptococcales;f__Anaerovoracaceae;g__Lentihominibacter;s__Lentihominibacter sp015058205	0	363.105	310.786	344.551	357.491	387.886	328.31	460.75	0	752.203	681.224	736.813	552.624	611.552	564.56	283.575	548.875	548.442
RGMC.1805	d__Bacteria;p__Bacillota_A;c__Clostridia;o__Peptostreptococcales;f__Anaerovoracaceae;g__Lentihominibacter;s__	0	224.914	0	268.681	319.058	313.794	255.34	324.009	0	545.365	513.878	558.047	438.368	472.601	457.863	0	371.138	378.278
RGMC.18062	d__Bacteria;p__Bacillota_A;c__Clostridia;o__Oscillospirales;f__Ruminococcaceae;g__Hominimerdicola;s__Hominimerdicola alba_A	0	504.588	618.691	329.125	426.246	308.726	0	325.35	0	0	295.123	0	0	0	233.082	0	0	0
RGMC.18064	d__Bacteria;p__Bacillota_A;c__Clostridia;o__Lachnospirales;f__Lachnospiraceae;g__Butyrivibrio;s__Butyrivibrio sp015056625	6676.1	0	0	0	0	0	0	0	8742.77	0	0	0	0	0	0	0	0	0
RGMC.18085	d__Bacteria;p__Bacillota_A;c__Clostridia;o__Oscillospirales;f__Oscillospiraceae;g__Hominicoprocola;s__Hominicoprocola sp015067435	0	0	351.291	0	0	0	0	255.239	0	0	0	0	0	0	0	0	0	0
RGMC.18133	d__Bacteria;p__Bacillota_A;c__Clostridia;o__Lachnospirales;f__Lachnospiraceae;g__VSOB01;s__VSOB01 sp015056735	0	0	261.735	0	0	0	0	0	0	0	0	0	0	0	0	0	0	0
RGMC.1814	d__Bacteria;p__Bacillota_A;c__Clostridia;o__Lachnospirales;f__Lachnospiraceae;g__UBA2868;s__UBA2868 sp900320345	0	912.675	1222.5	0	0	0	0	0	0	0	0	0	0	0	0	0	0	0
RGMC.18142	d__Bacteria;p__Bacillota_A;c__Clostridia;o__Oscillospirales;f__Butyricicoccaceae;g__RGIG1902;s__RGIG1902 sp015068445	214.646	451.713	530.427	247.249	0	294.377	0	307.85	188.853	0	0	0	0	0	0	194.257	194.932	195.083
RGMC.18143	d__Bacteria;p__Bacillota_A;c__Clostridia;o__Oscillospirales;f__Oscillospiraceae;g__Faecousia;s__Faecousia sp015068455	0	0	0	200.641	231.77	229.13	168.283	201.971	0	522.948	492.084	468.391	412.973	407.603	362.561	0	232.943	233.508
RGMC.18179	d__Bacteria;p__Bacillota_A;c__Clostridia;o__Lachnospirales;f__Lachnospiraceae;g__G11;s__G11 sp947167445	586.141	417.198	309.946	502.924	420.446	420.819	390.709	417.2	471.138	0	0	0	0	0	0	548.433	0	307.169
RGMC.18239	d__Bacteria;p__Bacillota_A;c__Clostridia;o__Lachnospirales;f__Lachnospiraceae;g__XBB1006;s__XBB1006 sp015057115	203.009	132.827	0	195.808	0	208.18	0	237.992	383.664	0	0	0	0	0	0	274.676	871.463	861.047
RGMC.1824	d__Bacteria;p__Bacillota_C;c__Negativicutes;o__Acidaminococcales;f__Acidaminococcaceae;g__Succiniclasticum;s__Succiniclasticum sp017443005	0	0	136.508	0	0	0	0	0	0	0	0	0	0	0	0	0	0	0
RGMC.18271	d__Bacteria;p__Bacillota_I;c__Bacilli_A;o__Erysipelotrichales;f__Erysipelotrichaceae;g__Bulleidia;s__Bulleidia sp902778375	0	669.284	0	705.31	0	822.414	0	701.564	0	0	1193.34	1311.63	0	871.175	1193.33	0	788.3	770.887
RGMC.18297	d__Bacteria;p__Bacillota_A;c__Clostridia;o__Lachnospirales;f__Lachnospiraceae;g__RUG191;s__RUG191 sp905234245	468.3	775.139	809.103	918.926	695.461	1086.44	970.99	1307.24	538.779	0	755.869	0	912.036	0	691.479	734.928	1091.19	1061.87
RGMC.183	d__Bacteria;p__Bacteroidota;c__Bacteroidia;o__Bacteroidales;f__UBA932;g__Cryptobacteroides;s__Cryptobacteroides sp017443465	130.143	0	129.212	0	0	0	0	0	0	0	0	0	0	0	0	0	0	0
RGMC.18360	d__Bacteria;p__Bacillota_I;c__Bacilli_A;o__Acholeplasmatales;f__Anaeroplasmataceae;g__Anaeroplasma;s__Anaeroplasma sp017449215	295.437	179.044	0	0	0	218.658	0	226.727	410.25	0	0	0	0	0	0	218.004	0	0
RGMC.1837	d__Bacteria;p__Bacteroidota;c__Bacteroidia;o__Bacteroidales;f__Bacteroidaceae;g__Prevotella;s__Prevotella sp900315105	354.095	253.387	0	276.126	0	361.189	391.562	291.263	428.56	0	0	0	313.886	0	304.193	607.007	351.139	345.266
RGMC.1840	d__Bacteria;p__Bacteroidota;c__Bacteroidia;o__Bacteroidales;f__Bacteroidaceae;g__Prevotella;s__Prevotella sp946185285	0	0	412.066	0	0	0	0	0	0	0	0	0	0	0	0	0	0	0
RGMC.18412	d__Bacteria;p__Bacillota_A;c__Clostridia;o__Lachnospirales;f__Lachnospiraceae;g__UBA2868;s__UBA2868 sp900320345	0	0	634.22	0	0	0	0	0	0	0	0	0	0	0	0	0	0	0
RGMC.18452	d__Bacteria;p__Spirochaetota;c__Spirochaetia;o__Treponematales;f__Treponemataceae;g__Treponema_D;s__Treponema_D sp002309195	0	0	0	0	0	0	0	0	0	0	0	0	0	0	85.6313	0	0	0
RGMC.1848	d__Bacteria;p__Spirochaetota;c__Spirochaetia;o__Treponematales;f__Treponemataceae;g__UBA1240;s__UBA1240 sp001603145	0	0	0	0	0	0	0	0	0	0	0	0	0	0	0	149.669	0	0
RGMC.18522	d__Bacteria;p__Bacteroidota;c__Bacteroidia;o__Bacteroidales;f__F082;g__Limimorpha;s__Limimorpha sp905233685	0	0	0	0	995.104	0	476.699	0	0	3090.42	1727.92	1764.05	2217.39	2312.48	1977.47	0	168.086	166.581
RGMC.18526	d__Bacteria;p__Bacillota_C;c__Negativicutes;o__Acidaminococcales;f__Acidaminococcaceae;g__Succiniclasticum;s__Succiniclasticum sp017443005	183.653	171.306	232.532	153.004	0	0	0	137.488	0	0	0	0	0	0	0	0	147.144	145.62
RGMC.18573	d__Archaea;p__Methanobacteriota;c__Methanobacteria;o__Methanobacteriales;f__Methanobacteriaceae;g__Methanobrevibacter_A;s__Methanobrevibacter_A sp900320515	0	316.977	0	225.477	0	260.947	178.409	265.821	0	0	0	0	0	0	0	0	250.946	250.456
RGMC.18582	d__Bacteria;p__Bacillota_C;c__Negativicutes;o__Acidaminococcales;f__Acidaminococcaceae;g__Succiniclasticum;s__Succiniclasticum sp017443005	201.757	188.497	238.454	164.574	0	0	158.463	156.399	0	0	0	0	0	0	0	0	147.931	148.028
RGMC.18595	d__Bacteria;p__Bacteroidota;c__Bacteroidia;o__Bacteroidales;f__P3;g__UBA1711;s__UBA1711 sp905234695	0	0	0	0	0	0	0	0	0	0	197.167	220.462	320.493	283.246	327.708	0	0	0
RGMC.18602	d__Bacteria;p__Bacteroidota;c__Bacteroidia;o__Bacteroidales;f__ML635J-15;g__Bact-19;s__Bact-19 sp905234755	0	0	0	0	0	0	0	0	0	535.444	545.795	600.265	871.895	979.849	815.792	0	0	0
RGMC.18605	d__Bacteria;p__Bacteroidota;c__Bacteroidia;o__Bacteroidales;f__UBA932;g__Cryptobacteroides;s__Cryptobacteroides sp905234795	377.22	0	281.538	0	0	0	0	0	436.414	0	0	0	0	0	0	0	0	0
RGMC.18620	d__Bacteria;p__Bacillota_A;c__Clostridia;o__Christensenellales;f__Aristaeellaceae;g__RUG563;s__RUG563 sp905234985	3757.11	3271.51	2918.3	3485.49	4539.56	3089.23	3512.75	2754.56	4038.96	4538.46	4809.4	4963.75	3916.18	3485.38	4227.83	3587.87	3329.69	3234.13
RGMC.18636	d__Bacteria;p__Bacteroidota;c__Bacteroidia;o__Bacteroidales;f__P3;g__UBA1711;s__UBA1711 sp902790215	711.871	439.979	445.791	0	0	291.109	0	298.662	462.59	0	0	0	0	0	0	410.952	0	0
RGMC.18642	d__Bacteria;p__Bacteroidota;c__Bacteroidia;o__Bacteroidales;f__Bacteroidaceae;g__UBA1179;s__UBA1179 sp902782245	877.945	556.916	811.158	405.822	351.811	473.041	515.348	477.615	996.24	375.683	203.679	226.528	341.656	367.298	312.284	661.296	322.881	325.46
RGMC.18646	d__Bacteria;p__Bacillota_A;c__Clostridia;o__Oscillospirales;f__Oscillospiraceae;g__Limivicinus;s__Limivicinus sp900317375	0	434.693	403.671	573.597	570.128	433.746	429.283	386.128	0	889.339	828.142	854.896	640.572	671.7	627.556	363.232	603.221	592.922
RGMC.18672	d__Bacteria;p__Bacteroidota;c__Bacteroidia;o__Bacteroidales;f__UBA932;g__Cryptobacteroides;s__Cryptobacteroides sp902761655	0	0	0	0	0	0	0	0	0	156.182	129.542	0	155.931	0	133.181	0	0	0
RGMC.18694	d__Bacteria;p__Bacillota_A;c__Clostridia;o__Oscillospirales;f__Oscillospiraceae;g__Limivicinus;s__Limivicinus sp900317375	0	529.148	481.192	676.52	673.171	539.633	513.725	489.226	0	890.027	907.441	925.419	718.484	797.485	711.721	431.538	709.068	701.595
RGMC.18708	d__Bacteria;p__Bacteroidota;c__Bacteroidia;o__Bacteroidales;f__Paludibacteraceae;g__RF16;s__RF16 sp002310195	2576.42	1291.3	1134.61	1383.08	1264.89	1403.22	1887.35	1984.36	2143.59	684.971	711.08	744.68	1027.44	1289.21	942.3	2193.7	1274.94	1264.71
RGMC.18718	d__Bacteria;p__Bacillota_A;c__Clostridia;o__Oscillospirales;f__Oscillospiraceae;g__Limivicinus;s__Limivicinus sp900317375	0	424.961	416.282	587.775	577.686	441.647	438.756	401.071	0	933.385	842.006	876.227	646.918	690.746	634.359	362.23	616.003	611.335
RGMC.18724	d__Bacteria;p__Bacillota_A;c__Clostridia;o__Oscillospirales;f__Oscillospiraceae;g__Limivicinus;s__Limivicinus sp900317375	0	470.994	413.855	652.273	648.556	479.877	480.354	412.854	0	973.729	916.111	928.484	705.97	742.36	698.947	390.487	649.285	647.295
RGMC.18728	d__Bacteria;p__Bacillota_A;c__Clostridia;o__Oscillospirales;f__Ruminococcaceae;g__Hominimerdicola;s__Hominimerdicola alba_A	0	406.095	485.514	264.358	338.697	251.348	221.737	298.728	176.757	0	230.968	219.046	0	0	186.27	0	181.178	178.05
RGMC.1874	d__Bacteria;p__Bacillota_A;c__Clostridia;o__Christensenellales;f__Aristaeellaceae;g__SFMI01;s__SFMI01 sp902781945	0	0	0	0	0	0	0	0	0	0	295.208	0	0	0	0	0	0	0
RGMC.18770	d__Bacteria;p__Spirochaetota;c__Spirochaetia;o__CADAEX01;f__CADAEX01;g__CADAEX01;s__CADAEX01 sp902787125	0	0	0	0	0	0	186.038	0	0	0	0	0	0	0	0	0	0	0
RGMC.18778	d__Bacteria;p__Bacteroidota;c__Bacteroidia;o__Bacteroidales;f__WCHB1-69;g__RUG11690;s__RUG11690 sp902771655	3815.19	2231.89	1610.83	1544.33	880.106	1822.31	1384.55	2174.39	3208.27	632.443	439.044	450.928	719.673	853.8	532.317	3047.3	1358.68	1361.69
RGMC.18779	d__Bacteria;p__Bacteroidota;c__Bacteroidia;o__Bacteroidales;f__F082;g__Limimorpha;s__Limimorpha sp902771635	0	0	0	0	0	0	0	0	0	512.414	351.051	362.483	426.845	438.556	382.324	0	0	0
RGMC.18799	d__Bacteria;p__Bacteroidota;c__Bacteroidia;o__Bacteroidales;f__Paludibacteraceae;g__RF16;s__RF16 sp902771935	880.929	509.708	423.449	533.244	445.537	540.329	618.308	585.766	1157.12	0	146.784	185.603	276.448	225.492	276.265	846.11	396.843	390.922
RGMC.18802	d__Bacteria;p__Bacillota_A;c__Clostridia;o__Lachnospirales;f__Lachnospiraceae;g__UBA1258;s__UBA1258 sp900100895	206.651	278.939	311.915	307.165	433.139	250.543	313.072	272.812	244.097	0	201.713	0	0	0	211.966	270.31	221.328	214.897
RGMC.18829	d__Bacteria;p__Verrucomicrobiota;c__Kiritimatiellia;o__RFP12;f__UBA1067;g__RUG572;s__RUG572 sp900320225	473.852	281.738	315.088	336.374	348.674	238.634	458.089	309.054	439.806	359.893	280.986	318.063	422.945	480.478	311.946	388.75	294.488	293.999
RGMC.18835	d__Bacteria;p__Bacillota_A;c__Clostridia;o__Oscillospirales;f__Oscillospiraceae;g__Limivicinus;s__Limivicinus sp900317375	0	441.711	428.456	599.019	582.069	448.993	445.151	406.325	0	924.52	845.81	877.947	647.171	704.168	653.986	378.058	627.374	615.372
RGMC.18836	d__Bacteria;p__Bacillota_A;c__Clostridia;o__Oscillospirales;f__Oscillospiraceae;g__Limivicinus;s__Limivicinus sp900317375	0	376.117	364.245	480.632	470.134	373.688	360.354	323.437	0	752.332	706.674	719.183	570.257	560.979	545.684	322.803	531.227	521.32
RGMC.18846	d__Bacteria;p__Bacteroidota;c__Bacteroidia;o__Bacteroidales;f__WCHB1-69;g__RUG11690;s__RUG11690 sp902771655	3939.77	2267.73	1498.01	1595.52	863.412	1800.17	1295.68	1821.93	3325.49	602.805	379.063	402.36	572.198	548.797	525.332	2958.04	1297.07	1293.09
RGMC.18849	d__Bacteria;p__Bacillota_A;c__Clostridia;o__Oscillospirales;f__Ruminococcaceae;g__RUG11783;s__RUG11783 sp902772615	334.739	461.606	550.397	457.246	335.029	526.872	345.321	570.918	276.039	453.514	431.101	469.805	423.738	379.913	398.419	312.464	412.114	418.654
RGMC.1888	d__Bacteria;p__Spirochaetota;c__Spirochaetia;o__Sphaerochaetales;f__Sphaerochaetaceae;g__UBA9732;s__	0	0	0	0	0	0	265.84	156.721	184.642	0	0	0	0	0	0	214.128	0	0
RGMC.18901	d__Bacteria;p__Bacteroidota;c__Bacteroidia;o__Bacteroidales;f__WCHB1-69;g__UBA1756;s__UBA1756 sp900321845	0	0	0	242.222	540.986	0	590.941	0	0	388.621	351.424	364.672	388.124	400.415	375.952	181.389	388.2	389.282
RGMC.18936	d__Bacteria;p__Bacillota_A;c__Clostridia;o__Oscillospirales;f__CAG-272;g__UMGS1696;s__UMGS1696 sp902773525	0	0	0	0	0	0	0	0	0	303.963	264.393	255.713	223.469	240.007	198.935	0	125.265	127.585
RGMC.18949	d__Bacteria;p__Bacillota_A;c__Clostridia;o__Oscillospirales;f__Oscillospiraceae;g__Limivicinus;s__Limivicinus sp900317375	208.68	424.18	485.733	557.904	583.689	444.908	465.293	435.665	202.905	910.752	845.552	867.494	689.158	757.788	656.993	346.666	621.642	608.641
RGMC.18989	d__Bacteria;p__Bacillota_A;c__Clostridia;o__Christensenellales;f__Aristaeellaceae;g__Aristaeella;s__Aristaeella lactis	0	290.601	403.61	0	0	0	0	0	0	0	0	0	0	0	0	0	0	0
RGMC.19016	d__Bacteria;p__Bacteroidota;c__Bacteroidia;o__Bacteroidales;f__P3;g__UBA1217;s__UBA1217 sp902788805	250.329	170.379	0	0	0	191.515	0	144.71	281.351	0	0	0	0	0	0	0	0	0
RGMC.19018	d__Bacteria;p__Bacteroidota;c__Bacteroidia;o__Bacteroidales;f__F082;g__Limimorpha;s__Limimorpha sp902774295	631.373	259.958	0	527.977	325.91	587.562	653.588	825.004	1041.36	160.909	0	0	185.962	207.092	151.623	761.874	343.578	340.768
RGMC.19024	d__Bacteria;p__Bacteroidota;c__Bacteroidia;o__Bacteroidales;f__F082;g__Limimorpha;s__Limimorpha sp902774365	0	0	0	0	421.35	0	425.256	0	0	767.199	432.409	452.63	505.242	487.499	444.634	0	325.608	327.752
RGMC.19031	d__Bacteria;p__Bacteroidota;c__Bacteroidia;o__Bacteroidales;f__UBA932;g__Cryptobacteroides;s__Cryptobacteroides sp902782225	983.256	646.324	796.226	625.993	436.041	588.246	470.951	414.95	799.12	506.997	361.65	360.519	325.33	251.375	356.169	858.66	543.936	537.378
RGMC.1904	d__Archaea;p__Methanobacteriota;c__Methanobacteria;o__Methanobacteriales;f__Methanobacteriaceae;g__Methanobrevibacter;s__Methanobrevibacter sp902784195	0	0	0	0	0	0	0	484.58	0	0	0	0	0	0	0	0	0	0
RGMC.19064	d__Archaea;p__Halobacteriota;c__Methanomicrobia;o__Methanomicrobiales;f__Methanomicrobiaceae;g__Methanomicrobium;s__Methanomicrobium mobile	33106.6	9275.82	8365.97	4797.03	5176.6	3339.38	10572.1	15938.3	15126.8	8613.17	6253.35	7829.09	11048.2	12428.7	6627.64	22461.9	12917.8	12633.5
RGMC.19079	d__Bacteria;p__Bacteroidota;c__Bacteroidia;o__Bacteroidales;f__Bacteroidaceae;g__Prevotella;s__Prevotella sp902799765	323.164	156.453	148.377	212.534	162.261	203.481	163.919	167.911	329.581	0	0	0	0	0	105.438	283.499	138.153	138.666
RGMC.19096	d__Bacteria;p__Bacteroidota;c__Bacteroidia;o__Bacteroidales;f__P3;g__UBA1217;s__UBA1217 sp902788805	263.463	179.906	0	0	0	203.316	0	158.984	290.961	0	0	0	0	0	0	0	0	0
RGMC.19131	d__Bacteria;p__Bacillota_A;c__Clostridia;o__Peptostreptococcales;f__Anaerovoracaceae;g__RUG099;s__RUG099 sp902775345	0	327.659	424.316	331.047	345	392.585	315.301	423.567	0	669.611	636.842	715.076	583.911	648.038	635.534	217.358	426.226	422.727
RGMC.19144	d__Bacteria;p__Bacteroidota;c__Bacteroidia;o__Bacteroidales;f__P3;g__UBA1217;s__UBA1217 sp902788805	220.383	154.291	0	0	0	181.762	0	140.777	244.859	0	0	0	0	0	0	0	0	0
RGMC.19155	d__Bacteria;p__Bacteroidota;c__Bacteroidia;o__Bacteroidales;f__Bacteroidaceae;g__Ga6A1;s__Ga6A1 sp900102385	0	0	0	0	0	0	244.769	0	0	0	0	0	0	0	0	0	0	0
RGMC.19168	d__Archaea;p__Methanobacteriota;c__Methanobacteria;o__Methanobacteriales;f__Methanobacteriaceae;g__Methanobrevibacter;s__Methanobrevibacter sp902784195	0	0	0	0	0	0	0	466.307	0	0	0	0	0	0	0	0	0	0
RGMC.19211	d__Bacteria;p__Bacillota_A;c__Clostridia;o__Oscillospirales;f__Acutalibacteraceae;g__Ruminococcus_E;s__Ruminococcus_E sp902776375	0	6597.1	6466.7	6271.92	6353.47	8077.2	3593.29	4905.41	0	0	2995.69	0	2685.06	0	3417.09	0	5847.04	5831.74
RGMC.19218	d__Bacteria;p__Bacteroidota;c__Bacteroidia;o__Bacteroidales;f__Bacteroidaceae;g__UBA4372;s__UBA4372 sp902776455	129.08	0	0	0	0	0	0	0	135.742	0	0	0	0	0	110.927	0	0	0
RGMC.19235	d__Bacteria;p__Bacteroidota;c__Bacteroidia;o__Bacteroidales;f__UBA3663;g__UBA3663;s__UBA3663 sp902776605	2346.67	1764.82	1872.37	1356.42	950.296	1741.46	1424.68	1653.95	2978.04	454.899	368.677	445.231	744.216	740.236	618.49	2128.56	1022.65	1014.08
RGMC.19251	d__Bacteria;p__Fibrobacterota;c__Fibrobacteria;o__Fibrobacterales;f__Fibrobacteraceae;g__Fibrobacter;s__Fibrobacter succinogenes_N	616.644	0	0	0	0	0	0	386.054	682.208	0	0	0	0	0	0	631.734	0	0
RGMC.19266	d__Bacteria;p__Bacillota_A;c__Clostridia;o__Peptostreptococcales;f__Peptostreptococcaceae;g__Peptostreptococcus;s__Peptostreptococcus sp900112955	0	0	3657.76	0	0	0	0	0	0	0	0	0	0	0	0	0	0	0
RGMC.19297	d__Bacteria;p__Bacillota_A;c__Clostridia;o__Christensenellales;f__Aristaeellaceae;g__UBA2862;s__UBA2862 sp902777335	0	0	238.011	1243.74	2244.43	576.177	816.271	309.089	0	828.977	2572.5	3378.86	1668.49	1211.12	2382.05	0	1083.23	1080.25
RGMC.19343	d__Bacteria;p__Bacteroidota;c__Bacteroidia;o__Bacteroidales;f__P3;g__UBA1217;s__UBA1217 sp902788805	281.691	203.44	0	0	0	237.705	0	183.522	304.241	0	0	0	0	0	0	211.305	0	0
RGMC.19386	d__Bacteria;p__Bacillota_A;c__Clostridia;o__Oscillospirales;f__Oscillospiraceae;g__Limivicinus;s__Limivicinus sp902778285	0	638.815	489.037	837.612	682.547	636.997	475.985	396.177	321.312	812.209	1005.15	1064.54	591.158	507.589	819.348	661.01	947.404	928.412
RGMC.19388	d__Bacteria;p__Bacillota_A;c__Clostridia;o__Oscillospirales;f__Oscillospiraceae;g__Limivicinus;s__Limivicinus sp902778275	0	503.965	245.418	883.308	900.207	798.438	668.055	669.334	264.069	1031.98	973.075	1018.11	713.638	683.359	793.704	453.152	852.046	842.862
RGMC.19391	d__Bacteria;p__Bacillota_I;c__Bacilli_A;o__Erysipelotrichales;f__Erysipelotrichaceae;g__Bulleidia;s__Bulleidia sp902778375	0	356.486	0	0	0	464.892	0	437.466	0	0	598.33	0	0	0	587.689	0	446.482	431.958
RGMC.19397	d__Bacteria;p__Pseudomonadota;c__Gammaproteobacteria;o__Enterobacterales;f__Succinivibrionaceae;g__Ruminobacter;s__Ruminobacter sp002309455	0	0	382.999	0	0	0	0	0	0	0	0	0	0	0	0	0	0	0
RGMC.19409	d__Bacteria;p__Bacteroidota;c__Bacteroidia;o__Bacteroidales;f__Bacteroidaceae;g__Prevotella;s__Prevotella sp900109055	971.045	619.195	644.374	642.393	573.948	708.06	816.208	1111.96	1000.83	186.285	265.392	223.345	435.49	633.806	270.023	1173.48	491.134	488.453
RGMC.19414	d__Bacteria;p__Bacillota_A;c__Clostridia;o__Peptostreptococcales;f__Anaerovoracaceae;g__RUG754;s__RUG754 sp902778565	130.416	386.155	600.863	345.481	341.537	428.839	329.856	549.465	147.334	566.257	564.609	519.074	525.505	567.215	454.623	215.718	417.815	424.523
RGMC.19422	d__Bacteria;p__Bacteroidota;c__Bacteroidia;o__Bacteroidales;f__P3;g__UBA1217;s__UBA1217 sp902788805	288.106	193.374	0	0	0	219.965	0	161.724	336.888	0	0	0	0	0	0	0	0	0
RGMC.19435	d__Bacteria;p__Bacteroidota;c__Bacteroidia;o__Bacteroidales;f__Bacteroidaceae;g__Prevotella;s__Prevotella sp902801155	276.435	194.136	0	224.965	238.655	297.398	338.189	246.375	339.449	0	0	194.472	259.412	219.781	246.779	485.926	283.12	277.172
RGMC.19482	d__Bacteria;p__Bacillota_A;c__Clostridia;o__Oscillospirales;f__Acutalibacteraceae;g__Ruminococcus_E;s__Ruminococcus_E sp902779225	0	300.185	364.022	269.307	0	332.261	0	291.75	0	0	0	0	0	0	0	0	0	0
RGMC.19491	d__Bacteria;p__Bacteroidota;c__Bacteroidia;o__Bacteroidales;f__Bacteroidaceae;g__UBA4372;s__UBA4372 sp902779315	426.312	232.466	213.034	235.337	187.658	210.031	231.104	237.451	368.51	148.715	159.875	174.96	193.107	202.699	195.592	375.063	195.854	197.184
RGMC.19495	d__Bacteria;p__Bacteroidota;c__Bacteroidia;o__Bacteroidales;f__UBA932;g__Cryptobacteroides;s__Cryptobacteroides sp902785575	166.422	0	0	0	0	0	0	0	0	0	0	0	0	0	0	0	0	0
RGMC.19500	d__Bacteria;p__Bacteroidota;c__Bacteroidia;o__Bacteroidales;f__Bacteroidaceae;g__Prevotella;s__Prevotella sp900109055	1207.77	738.62	714.071	767.289	604.619	809.524	684.733	759.93	1261.62	193.419	194.46	171.195	276.188	279.498	276.32	1355.34	525.094	516.162
RGMC.19504	d__Bacteria;p__Bacillota_A;c__Clostridia;o__Lachnospirales;f__Lachnospiraceae;g__NK4A144;s__NK4A144 sp902779445	0	0	1073.05	0	0	0	0	0	0	0	0	0	0	0	0	0	0	0
RGMC.19518	d__Bacteria;p__Bacteroidota;c__Bacteroidia;o__Bacteroidales;f__Bacteroidaceae;g__Prevotella;s__Prevotella sp900315105	883.419	665.32	542.572	605.547	622.219	807.316	804.376	622.387	1017.86	0	0	578.244	689.082	509.238	646.693	1449.98	859.956	853.071
RGMC.19526	d__Bacteria;p__Bacillota_A;c__Clostridia;o__Oscillospirales;f__Oscillospiraceae;g__Hominicoprocola;s__Hominicoprocola sp902779695	0	409.597	524.919	0	0	0	0	395.674	0	0	0	0	0	0	0	0	0	0
RGMC.19536	d__Bacteria;p__Bacillota_A;c__Clostridia;o__Oscillospirales;f__Oscillospiraceae;g__Limivicinus;s__Limivicinus sp900317375	0	337.937	326.637	420.815	413.755	340.645	313.706	279.488	0	648.478	608.196	616.128	473.597	472.333	464.959	275.613	467.225	449.477
RGMC.19543	d__Bacteria;p__Bacillota_A;c__Clostridia;o__Saccharofermentanales;f__Saccharofermentanaceae;g__Saccharofermentans;s__Saccharofermentans sp017428155	0	0	0	0	229.806	0	209.706	0	0	546.901	299.394	308.754	231.315	238.269	261.88	0	200.217	201.017
RGMC.19544	d__Bacteria;p__Bacteroidota;c__Bacteroidia;o__Bacteroidales;f__Bacteroidaceae;g__Prevotella;s__Prevotella sp900109055	1021.53	618.132	611.909	654.999	505.941	686.466	572.117	651.099	1061.7	163.83	169.453	148.989	236.54	239.78	230.605	1158.52	449.543	437.108
RGMC.19546	d__Bacteria;p__Bacteroidota;c__Bacteroidia;o__Bacteroidales;f__Bacteroidaceae;g__UBA1179;s__UBA1179 sp902779875	274.046	207.462	200.812	190.223	0	220.669	215.271	279.292	356.362	0	0	0	0	0	0	315.839	137.537	138.919
RGMC.19553	d__Bacteria;p__Fibrobacterota;c__Fibrobacteria;o__Fibrobacterales;f__Fibrobacteraceae;g__Fibrobacter;s__Fibrobacter succinogenes_F	710.165	478.61	450.52	429.15	474.457	486.414	539.345	532.526	775.871	230.49	212.165	0	248.827	252.56	231.731	1044.5	311.071	312.282
RGMC.19559	d__Bacteria;p__Bacteroidota;c__Bacteroidia;o__Bacteroidales;f__Bacteroidaceae;g__UBA4372;s__UBA4372 sp902779315	397.557	221.871	203.193	226.695	182.042	198.663	226.726	218.652	354.822	0	148.68	168.785	182.138	186.362	185.683	360.232	186.748	184.163
RGMC.19561	d__Bacteria;p__Bacteroidota;c__Bacteroidia;o__Bacteroidales;f__Bacteroidaceae;g__Ga6A1;s__Ga6A1 sp900102385	0	0	0	0	0	0	227.942	0	0	0	0	0	0	0	0	0	0	0
RGMC.19572	d__Bacteria;p__Bacteroidota;c__Bacteroidia;o__Bacteroidales;f__UBA932;g__Cryptobacteroides;s__Cryptobacteroides sp902761655	0	0	0	0	0	0	0	0	0	0	0	0	0	0	95.0418	0	0	0
RGMC.19588	d__Bacteria;p__Bacteroidota;c__Bacteroidia;o__Bacteroidales;f__SZUA-534;g__RUG13583;s__RUG13583 sp946404125	229.659	169.284	195.627	0	0	0	0	299.723	258.852	0	0	0	0	0	0	246.207	0	0
RGMC.19596	d__Bacteria;p__Bacillota_A;c__Clostridia;o__Lachnospirales;f__Lachnospiraceae;g__CAG-791;s__CAG-791 sp902780385	0	3502.34	1446.06	3193.33	3403.49	3905.9	3222.02	4661.65	0	1247.81	3645.68	3839.75	3030.17	3271.09	3438.23	2214.64	3434.6	3392.18
RGMC.19597	d__Archaea;p__Methanobacteriota;c__Methanobacteria;o__Methanobacteriales;f__Methanobacteriaceae;g__Methanobrevibacter;s__Methanobrevibacter sp902784195	0	0	0	0	0	0	0	432.843	0	0	0	0	0	0	0	0	0	0
RGMC.19601	d__Bacteria;p__Bacteroidota;c__Bacteroidia;o__Bacteroidales;f__Bacteroidaceae;g__Ga6A1;s__Ga6A1 sp900102385	0	0	0	0	0	0	252.612	0	0	0	0	0	0	0	0	0	0	0
RGMC.19603	d__Bacteria;p__Bacillota_A;c__Clostridia;o__Lachnospirales;f__Lachnospiraceae;g__Moryella;s__Moryella sp902780465	0	2476.71	2081.32	2995.59	3306.97	2668.84	2683.36	3439.9	0	0	1695.38	0	0	0	1728.96	0	2381.11	2315.17
RGMC.19626	d__Bacteria;p__Bacteroidota;c__Bacteroidia;o__Bacteroidales;f__Bacteroidaceae;g__Prevotella;s__Prevotella sp902780635	565.755	0	310.999	0	0	0	0	0	0	0	0	0	0	0	0	0	0	0
RGMC.19638	d__Bacteria;p__Actinomycetota;c__Actinomycetes;o__Propionibacteriales;f__Propionibacteriaceae;g__Cutibacterium;s__Cutibacterium acnes	0	0	0	0	0	0	0	99.6993	0	0	0	0	0	92.7168	0	0	0	0
RGMC.19640	d__Bacteria;p__Bacteroidota;c__Bacteroidia;o__Bacteroidales;f__P3;g__UBA1217;s__UBA1217 sp902788805	239.513	158.865	0	0	0	185.201	0	148.328	269.605	0	0	0	0	0	0	0	0	0
RGMC.19657	d__Bacteria;p__Fibrobacterota;c__Fibrobacteria;o__Fibrobacterales;f__Fibrobacteraceae;g__Fibrobacter;s__Fibrobacter sp002210345	1248.99	776.191	637.173	654.367	561.206	799.123	604.826	702.535	1350.6	0	0	0	0	0	0	972.519	383.111	377.321
RGMC.19680	d__Bacteria;p__Bacillota_A;c__Clostridia;o__Lachnospirales;f__Lachnospiraceae;g__Pseudobutyrivibrio;s__Pseudobutyrivibrio ruminis_C	0	0	0	0	0	0	0	0	0	0	2577.01	0	0	0	0	0	0	0
RGMC.19702	d__Bacteria;p__Bacillota_A;c__Clostridia;o__Lachnospirales;f__Lachnospiraceae;g__Porcincola;s__Porcincola sp902781455	0	0	0	684.569	693.434	545.365	610.92	697.256	0	544.379	999.607	1168.66	1044.34	978.06	1051.54	0	1008.86	982.234
RGMC.19715	d__Bacteria;p__Spirochaetota;c__Spirochaetia;o__Sphaerochaetales;f__Sphaerochaetaceae;g__UBA9732;s__UBA9732 sp902781545	0	0	0	177.063	204.654	0	303.057	0	200.304	0	0	0	231.986	233.964	184.09	305.961	199.769	197.983
RGMC.19731	d__Bacteria;p__Bacillota_A;c__Clostridia;o__Lachnospirales;f__Lachnospiraceae;g__Pseudobutyrivibrio;s__Pseudobutyrivibrio sp900107545	2398.11	5007.53	8123.31	5363.28	3321.84	3349.63	2176.82	1738.03	2917.15	0	2074.07	2063.19	1561.24	0	1578.9	2461.52	2430.84	2399.93
RGMC.19740	d__Bacteria;p__Bacteroidota;c__Bacteroidia;o__Bacteroidales;f__P3;g__UBA1217;s__UBA1217 sp902788805	237.156	163.264	0	0	0	188.922	0	143.827	253.848	0	0	0	0	0	0	0	0	0
RGMC.19754	d__Bacteria;p__Bacillota_A;c__Clostridia;o__Christensenellales;f__Aristaeellaceae;g__SFMI01;s__SFMI01 sp902781945	0	0	0	0	0	0	0	0	0	0	286.167	0	0	0	0	0	0	0
RGMC.19769	d__Bacteria;p__Bacteroidota;c__Bacteroidia;o__Bacteroidales;f__Muribaculaceae;g__Sodaliphilus;s__Sodaliphilus sp902793405	496.122	354.976	322.144	325.174	0	311.585	0	283.811	341.668	0	0	0	0	0	0	380.029	302.854	302.927
RGMC.19776	d__Bacteria;p__Bacillota_A;c__Clostridia;o__Oscillospirales;f__Acutalibacteraceae;g__Ruminococcus_E;s__Ruminococcus_E sp902779225	0	462.221	615.09	399.582	322.258	481.362	0	423.92	0	0	0	0	0	0	0	0	0	0
RGMC.19780	d__Bacteria;p__Bacteroidota;c__Bacteroidia;o__Bacteroidales;f__UBA932;g__Cryptobacteroides;s__Cryptobacteroides sp902782225	1004.81	594.38	745.914	602.151	416.902	568.946	464.171	390.344	817.171	444.075	281.515	278.784	294.542	223.682	314.275	882.195	493.299	496.962
RGMC.19783	d__Bacteria;p__Bacteroidota;c__Bacteroidia;o__Bacteroidales;f__Bacteroidaceae;g__UBA1179;s__UBA1179 sp902782245	673.025	431.968	643.361	309.213	268.006	368.906	391.7	380.577	777.23	283.426	153.914	175.889	262.933	282.208	233.38	491.702	250.897	255.257
RGMC.19797	d__Bacteria;p__Bacteroidota;c__Bacteroidia;o__Bacteroidales;f__UBA932;g__Cryptobacteroides;s__Cryptobacteroides sp902761655	0	0	0	0	0	0	0	0	0	0	0	0	127.85	0	123.543	0	0	0
RGMC.198	d__Bacteria;p__Bacillota_I;c__Bacilli_A;o__RFN20;f__CAG-826;g__RUG13091;s__RUG13091 sp016290145	253.879	108.327	0	684.104	1004.95	424.256	1506.41	425.277	439.423	708.565	737.531	714.74	1309.25	1536.77	1164.8	821.093	747.069	742.069
RGMC.19802	d__Bacteria;p__Bacillota_A;c__Clostridia;o__Oscillospirales;f__CAG-272;g__UMGS1696;s__UMGS1696 sp902782445	0	175.486	206.952	131.691	0	149.426	0	160.015	0	177.498	172.428	161.155	153.942	159.332	124.192	0	159.826	158.589
RGMC.19805	d__Bacteria;p__Bacteroidota;c__Bacteroidia;o__Bacteroidales;f__P3;g__UBA1711;s__UBA1711 sp902790215	518.222	344.566	361.217	0	0	220.969	0	235.302	348.21	0	0	0	0	0	0	310.258	0	0
RGMC.19807	d__Bacteria;p__Bacteroidota;c__Bacteroidia;o__Bacteroidales;f__Bacteroidaceae;g__UBA4372;s__UBA4372 sp902779315	428.776	237.137	208.072	242.137	186.825	207.316	224.357	215.453	362.77	0	177.973	194.092	204.125	206.784	201.331	381.975	196.953	196.315
RGMC.19827	d__Bacteria;p__Bacillota_A;c__Clostridia;o__Lachnospirales;f__Lachnospiraceae;g__UBA3766;s__UBA3766 sp902782715	373.031	410.406	140.255	1151.74	2170.52	867.696	1613.34	774.263	571.034	2776.74	2212.67	2234.14	2047.9	2286.26	2295.78	555.974	1076.66	1071.51
RGMC.19835	d__Bacteria;p__Bacillota_A;c__Clostridia;o__Lachnospirales;f__Lachnospiraceae;g__Pseudobutyrivibrio;s__Pseudobutyrivibrio ruminis_C	0	0	0	0	0	0	0	0	0	0	753.335	0	0	0	0	0	0	0
RGMC.19864	d__Archaea;p__Methanobacteriota;c__Methanobacteria;o__Methanobacteriales;f__Methanobacteriaceae;g__Methanobrevibacter_A;s__Methanobrevibacter_A sp902783085	0	178.736	0	199.286	0	326.423	137.547	324.607	133.662	0	0	0	0	0	0	0	153.53	166.803
RGMC.1987	d__Bacteria;p__Bacteroidota;c__Bacteroidia;o__Bacteroidales;f__Paludibacteraceae;g__RF16;s__RF16 sp017394705	455.585	260.2	270.695	184.789	0	194.839	196.254	205.179	426.962	0	0	0	0	0	0	360.968	143.697	149.482
RGMC.19872	d__Bacteria;p__Pseudomonadota;c__Gammaproteobacteria;o__Enterobacterales;f__Succinivibrionaceae;g__Ruminobacter;s__Ruminobacter amylophilus	3256.29	1938.79	2661.42	1983.07	1798.51	1802.13	2097.22	1660.56	4109.7	0	0	0	2203.58	2592.99	2410.71	5196.74	2426.45	2404.14
RGMC.19882	d__Bacteria;p__Pseudomonadota;c__Gammaproteobacteria;o__Enterobacterales;f__Succinivibrionaceae;g__Ruminobacter;s__Ruminobacter amylophilus	0	0	0	0	0	0	0	0	970.943	0	0	0	0	0	0	0	0	0
RGMC.19887	d__Bacteria;p__Bacillota_A;c__Clostridia;o__Lachnospirales;f__Lachnospiraceae;g__UBA3305;s__UBA3305 sp902783295	0	431.378	0	622.185	781.262	599.449	0	483.663	0	0	847.843	1021.74	0	0	749.669	0	711.082	683.331
RGMC.19899	d__Bacteria;p__Bacillota_A;c__Clostridia;o__Oscillospirales;f__CAG-272;g__SIG701;s__	0	0	0	0	149.016	0	0	0	0	225.755	144.472	163.945	168.824	176.26	152.534	0	124.036	119.1
RGMC.19903	d__Bacteria;p__Bacillota_A;c__Clostridia;o__Lachnospirales;f__Bianqueaceae;g__RUG159;s__RUG159 sp017474705	0	419.941	251.911	0	0	549.149	0	375.877	0	0	763.627	888.121	571.938	500.434	707.547	0	635.718	636.721
RGMC.19933	d__Bacteria;p__Bacillota_A;c__Clostridia;o__Lachnospirales;f__Lachnospiraceae;g__UBA1267;s__UBA1267 sp902783795	0	0	0	0	0	0	0	0	0	1018.92	610.7	717.206	500.909	469.269	523.724	0	0	0
RGMC.19942	d__Bacteria;p__Bacillota_A;c__Clostridia;o__Oscillospirales;f__CAG-272;g__CAG-390;s__CAG-390 sp902783905	0	0	0	0	0	0	0	0	0	147.32	98.8613	0	103.208	0	87.1219	0	0	77.6417
RGMC.19963	d__Bacteria;p__Bacillota_A;c__Clostridia;o__Oscillospirales;f__Oscillospiraceae;g__Limivicinus;s__Limivicinus sp900317375	0	380.456	358.161	527.592	517.878	390.615	393.724	355.407	0	809.767	741.357	771.701	576.95	617.851	564.722	330.316	543.492	545.527
RGMC.19967	d__Archaea;p__Methanobacteriota;c__Methanobacteria;o__Methanobacteriales;f__Methanobacteriaceae;g__Methanobrevibacter;s__Methanobrevibacter sp902784195	0	0	0	0	0	332.689	0	450.297	0	0	0	0	0	0	0	0	0	0
RGMC.19988	d__Bacteria;p__Bacteroidota;c__Bacteroidia;o__Bacteroidales;f__Paludibacteraceae;g__RF16;s__RF16 sp900321775	398.775	254.618	272.839	0	0	219.226	0	0	390.219	0	0	0	0	0	0	313.909	0	0
RGMC.19993	d__Bacteria;p__Bacillota_A;c__Clostridia;o__Oscillospirales;f__Oscillospiraceae;g__Limivicinus;s__Limivicinus sp900317375	0	381.076	371.512	524.883	532.654	403.318	418.161	379.613	0	799.405	735.866	762.008	580.387	639.286	562.311	335.256	552.985	543.053
RGMC.2	d__Bacteria;p__Bacteroidota;c__Bacteroidia;o__Bacteroidales;f__UBA932;g__Bact-11;s__Bact-11 sp016284265	0	0	0	0	0	0	225.051	251.207	0	0	209.841	0	0	0	0	0	210.359	219.036
RGMC.20005	d__Bacteria;p__Bacillota_A;c__Clostridia;o__Oscillospirales;f__Ruminococcaceae;g__Hominimerdicola;s__Hominimerdicola alba_A	0	552.39	710.34	363.169	471.454	348.058	0	436.278	0	0	330.38	0	0	0	258.976	0	0	0
RGMC.20006	d__Bacteria;p__Bacillota_A;c__Clostridia;o__Oscillospirales;f__Oscillospiraceae;g__Limivicinus;s__Limivicinus sp900317375	0	401.384	398.128	546.375	535.328	412.399	403.193	367.11	0	820.409	776.765	788.983	597.592	633.754	582.715	345.005	570.649	559.971
RGMC.20007	d__Bacteria;p__Bacillota_A;c__Clostridia;o__Christensenellales;f__Aristaeellaceae;g__UBA2862;s__UBA2862 sp900318045	0	0	748.28	0	0	0	0	0	0	0	0	0	0	0	0	0	0	0
RGMC.20010	d__Bacteria;p__Bacillota_A;c__Clostridia;o__Oscillospirales;f__Oscillospiraceae;g__Limivicinus;s__Limivicinus sp900317375	0	315.103	287.979	432.043	428.328	331.988	321.882	293.287	0	628.321	588.335	595.697	433.344	478.397	433.184	0	432.971	435.565
RGMC.20017	d__Bacteria;p__Bacteroidota;c__Bacteroidia;o__Bacteroidales;f__Paludibacteraceae;g__RF16;s__RF16 sp900321775	439.732	287.742	307.64	0	0	239.738	0	208.993	431.144	0	0	0	0	0	0	339.698	0	0
RGMC.20023	d__Bacteria;p__Bacillota_A;c__Clostridia;o__Oscillospirales;f__Oscillospiraceae;g__Limivicinus;s__Limivicinus sp900317375	0	380.69	375.566	508.802	506.245	384.048	387.756	342.902	0	798.489	731.95	761.551	575.048	605.874	562.082	323.247	530.739	528.607
RGMC.20031	d__Bacteria;p__Bacillota_A;c__Clostridia;o__Oscillospirales;f__Oscillospiraceae;g__Limivicinus;s__Limivicinus sp900317375	0	380.025	379.987	513.421	507.153	384.071	384.941	354.091	0	789.534	734.972	760.741	580.606	612.809	558.22	325.871	544.957	532.443
RGMC.20041	d__Bacteria;p__Bacillota_A;c__Clostridia;o__Oscillospirales;f__Ruminococcaceae;g__Ruminococcus;s__Ruminococcus flavefaciens_F	0	206.22	0	244.693	452.543	230.444	312.916	227.452	0	1122.7	1095.49	1011.67	755.018	961.924	782.581	0	296.959	291.095
RGMC.20042	d__Bacteria;p__Bacteroidota;c__Bacteroidia;o__Bacteroidales;f__Bacteroidaceae;g__Ga6A1;s__Ga6A1 sp900102385	0	0	0	0	0	0	194.247	0	0	0	0	0	0	0	0	0	0	0
RGMC.20062	d__Bacteria;p__Bacillota_A;c__Clostridia;o__Oscillospirales;f__Oscillospiraceae;g__Limivicinus;s__Limivicinus sp900319695	0	247.509	0	343.445	335.597	246.761	258.905	192.049	0	0	0	0	0	0	0	0	237.907	234.661
RGMC.2007	d__Bacteria;p__Bacillota_A;c__Clostridia;o__Christensenellales;f__Aristaeellaceae;g__UBA2862;s__UBA2862 sp900317565	0	1440.1	522.27	2179.74	2004.86	1638.72	0	1215.74	0	1411.93	2479.7	2901.7	1770.18	1358.8	2104.3	0	1585.11	1554.36
RGMC.20080	d__Bacteria;p__Bacillota_A;c__Clostridia;o__Oscillospirales;f__Acutalibacteraceae;g__RUG592;s__RUG592 sp902785425	0	911.134	653.197	726.761	823.74	748.018	582.736	922.195	0	621.365	1860.01	2341.97	1824.26	1934.13	2142.79	0	744.909	740.138
RGMC.20082	d__Bacteria;p__Bacillota_C;c__Negativicutes;o__Selenomonadales;f__Selenomonadaceae;g__Anaerovibrio;s__Anaerovibrio sp902785445	0	1452.72	1731.62	0	0	0	0	0	0	0	0	0	0	0	0	0	0	0
RGMC.20087	d__Bacteria;p__Bacteroidota;c__Bacteroidia;o__Bacteroidales;f__Bacteroidaceae;g__Ga6A1;s__Ga6A1 sp900102385	0	0	0	0	0	0	261.822	0	0	0	0	0	0	0	0	0	0	0
RGMC.20099	d__Bacteria;p__Bacillota_A;c__Clostridia;o__Oscillospirales;f__Ruminococcaceae;g__Ruminococcus;s__Ruminococcus flavefaciens_C	0	234.959	0	324.748	478.364	310.333	345.028	275.057	0	642.048	707.498	724.118	537.401	530.443	543.159	0	320.068	315.782
RGMC.20101	d__Bacteria;p__Bacteroidota;c__Bacteroidia;o__Bacteroidales;f__UBA932;g__Cryptobacteroides;s__Cryptobacteroides sp902785575	148.81	0	0	0	0	0	0	0	0	0	0	0	0	0	0	0	0	0
RGMC.20120	d__Bacteria;p__Bacteroidota;c__Bacteroidia;o__Bacteroidales;f__Bacteroidaceae;g__Ga6A1;s__Ga6A1 sp900102385	0	0	0	0	0	0	220.333	0	0	0	0	0	0	0	0	0	0	0
RGMC.2013	d__Bacteria;p__Bacteroidota;c__Bacteroidia;o__Bacteroidales;f__Bacteroidaceae;g__Prevotella;s__Prevotella sp902801155	389.043	281.518	0	307.029	302.511	382.754	400.718	294.999	482.198	0	0	264.84	317.053	258.697	315.126	685.576	389.526	390.63
RGMC.20164	d__Bacteria;p__Chloroflexota;c__Anaerolineae;o__Anaerolineales;f__Anaerolineaceae;g__Flexilinea;s__Flexilinea sp902786265	0	478.696	456.189	376.399	443.476	414.302	433.866	556.018	211.818	642.181	785.248	813.872	826.23	1185.3	600.857	0	389.8	383.199
RGMC.20168	d__Bacteria;p__Bacillota_A;c__Clostridia;o__Oscillospirales;f__Oscillospiraceae;g__Limivicinus;s__Limivicinus sp900319695	0	233.51	0	320.64	328.62	236.785	278.42	192.398	0	0	0	0	0	0	0	0	251.685	247.669
RGMC.20179	d__Bacteria;p__Bacillota_A;c__Clostridia;o__Oscillospirales;f__Ruminococcaceae;g__HUN007;s__HUN007 sp000712055	0	1044.27	0	0	0	0	0	0	0	0	0	0	0	0	0	0	0	0
RGMC.2018	d__Bacteria;p__Bacillota_A;c__Clostridia;o__Lachnospirales;f__Lachnospiraceae;g__RUG11977;s__RUG11977 sp016287095	8349.1	5148.91	4182.62	5048.58	4813.2	5745.59	5376.07	5567.07	9662.31	2290.25	1827.32	2744.85	3845.14	3883.11	3981.05	7414.09	3856.9	3834.87
RGMC.20200	d__Bacteria;p__Fibrobacterota;c__Fibrobacteria;o__Fibrobacterales;f__Fibrobacteraceae;g__Fibrobacter;s__Fibrobacter sp002210345	1019.14	635.542	569.058	537.41	470.447	672.766	528.248	616.948	1163.57	0	0	0	0	0	0	815.804	310.586	311.829
RGMC.20222	d__Bacteria;p__Bacteroidota;c__Bacteroidia;o__Bacteroidales;f__UBA932;g__Cryptobacteroides;s__Cryptobacteroides sp900318015	459.208	284.73	280.23	318.103	327.341	276.093	292.109	249.11	303.793	595.838	466.312	488.357	433.213	409.287	424.103	383.97	328.619	330.434
RGMC.20227	d__Bacteria;p__Bacillota_A;c__Clostridia;o__Oscillospirales;f__Acutalibacteraceae;g__CAG-177;s__CAG-177 sp902787025	0	87.3671	0	178.875	248.855	171.67	198.612	169.392	0	542.036	695.126	738.776	746.917	721.025	593.425	0	235.572	231.112
RGMC.20240	d__Bacteria;p__Spirochaetota;c__Spirochaetia;o__CADAEX01;f__CADAEX01;g__CADAEX01;s__CADAEX01 sp902787125	0	0	0	0	0	0	176.334	0	0	0	0	0	0	0	0	0	0	0
RGMC.20244	d__Bacteria;p__Bacteroidota;c__Bacteroidia;o__Bacteroidales;f__Paludibacteraceae;g__RF16;s__RF16 sp900321775	472.885	301.999	316.224	236.73	0	257.202	232.48	224.226	451.426	0	0	0	0	0	0	351.162	0	0
RGMC.20248	d__Bacteria;p__Bacteroidota;c__Bacteroidia;o__Bacteroidales;f__UBA932;g__Cryptobacteroides;s__Cryptobacteroides sp902787255	0	0	0	0	0	0	0	0	0	1913.96	1060.33	1264.03	1198.75	1007.53	1077.17	0	0	0
RGMC.20249	d__Bacteria;p__Bacteroidota;c__Bacteroidia;o__Bacteroidales;f__UBA932;g__Cryptobacteroides;s__Cryptobacteroides sp902761655	0	0	0	0	0	0	0	0	0	0	0	0	0	0	114.001	0	0	0
RGMC.2025	d__Bacteria;p__Bacillota_A;c__Clostridia;o__Lachnospirales;f__Lachnospiraceae;g__Eubacterium_Q;s__	1921.09	7690.91	12032.1	2963.38	2552.03	4893	2236.33	5765.4	2525.2	425.818	774.112	807.183	477.089	438.022	582.038	1530.95	1644.05	1654.76
RGMC.20259	d__Bacteria;p__Bacteroidota;c__Bacteroidia;o__Bacteroidales;f__UBA932;g__Cryptobacteroides;s__Cryptobacteroides sp900320545	368.213	298.6	298.946	321.177	306.532	287.597	267.381	285.844	274.553	568.8	539.614	551.52	462.164	492.962	415.788	347.001	296.581	289.59
RGMC.20277	d__Bacteria;p__Bacteroidota;c__Bacteroidia;o__Bacteroidales;f__Bacteroidaceae;g__Ga6A1;s__Ga6A1 sp900102385	0	0	0	0	0	0	246.379	0	0	0	0	0	0	0	0	0	0	0
RGMC.20282	d__Bacteria;p__Bacillota_A;c__Clostridia;o__Oscillospirales;f__Oscillospiraceae;g__Limivicinus;s__Limivicinus sp900317375	0	397.136	366.23	532.812	518.851	399.074	394.783	364.249	0	784.061	740.093	762.774	574.723	630.537	569.169	334.465	546.809	543.927
RGMC.20289	d__Bacteria;p__Bacillota_A;c__Clostridia;o__Peptostreptococcales;f__Anaerovoracaceae;g__Lentihominibacter;s__Lentihominibacter sp902787725	0	279.397	294.337	337.341	379.083	372.431	380.676	484.875	0	498.384	548.059	545.383	532.747	601.247	491.995	0	424.604	422.676
RGMC.20294	d__Bacteria;p__Bacteroidota;c__Bacteroidia;o__Bacteroidales;f__P3;g__UBA1711;s__UBA1711 sp902790215	626.013	415.107	406.764	0	0	275.46	0	303.889	422.065	0	0	0	0	0	0	368.863	0	0
RGMC.20306	d__Bacteria;p__Bacteroidota;c__Bacteroidia;o__Bacteroidales;f__P3;g__UBA1217;s__UBA1217 sp902788805	267.485	183.664	0	0	0	212.034	0	168.3	291.013	0	0	0	0	0	0	0	0	0
RGMC.20318	d__Bacteria;p__Bacteroidota;c__Bacteroidia;o__Bacteroidales;f__Bacteroidaceae;g__Ga6A1;s__Ga6A1 sp900102385	0	0	0	0	0	0	207.011	0	0	0	0	0	0	0	0	0	0	0
RGMC.20342	d__Bacteria;p__Bacillota_A;c__Clostridia;o__Peptostreptococcales;f__Anaerovoracaceae;g__RUG099;s__RUG099 sp902788245	0	0	0	0	517.829	912.649	548.642	701.57	0	0	521.527	519.184	596.203	572.583	554.329	0	1223.94	1211.17
RGMC.2035	d__Bacteria;p__Bacillota_A;c__Clostridia;o__Lachnospirales;f__Lachnospiraceae;g__UBA2868;s__UBA2868 sp900320345	0	591.477	1029.01	0	0	0	0	0	0	0	0	0	0	0	0	0	0	0
RGMC.20356	d__Bacteria;p__Bacteroidota;c__Bacteroidia;o__Bacteroidales;f__F082;g__Limimorpha;s__Limimorpha sp900315175	220.392	0	0	0	0	205.692	256.791	307.16	359.122	0	0	0	0	0	0	272.454	0	0
RGMC.20363	d__Bacteria;p__Bacteroidota;c__Bacteroidia;o__Bacteroidales;f__P3;g__UBA1217;s__UBA1217 sp902788805	226.295	157.814	0	0	0	180.783	0	142.931	252.285	0	0	0	0	0	0	0	0	0
RGMC.20393	d__Bacteria;p__Spirochaetota;c__Spirochaetia;o__CADAEX01;f__CADAEX01;g__CADAEX01;s__CADAEX01 sp902787125	0	0	0	0	0	0	195.389	0	0	0	0	0	0	0	0	0	0	0
RGMC.20394	d__Bacteria;p__Bacteroidota;c__Bacteroidia;o__Bacteroidales;f__Bacteroidaceae;g__Ga6A1;s__Ga6A1 sp900102385	0	0	0	0	0	0	250.722	0	0	0	0	0	0	0	0	0	0	0
RGMC.20397	d__Bacteria;p__Bacteroidota;c__Bacteroidia;o__Bacteroidales;f__P3;g__UBA1217;s__UBA1217 sp902788805	248.653	168.565	0	0	0	195.844	0	154.217	271.581	0	0	0	0	0	0	0	0	0
RGMC.20426	d__Bacteria;p__Bacillota_A;c__Clostridia;o__Clostridiales;f__Clostridiaceae;g__Clostridium_T;s__Clostridium_T intestinale	0	0	0	0	0	0	0	456.117	828.144	0	0	0	0	0	0	0	0	0
RGMC.20427	d__Bacteria;p__Bacteroidota;c__Bacteroidia;o__Bacteroidales;f__UBA932;g__Cryptobacteroides;s__Cryptobacteroides sp902785575	222.881	0	0	0	0	0	0	0	0	0	0	0	0	0	0	0	0	0
RGMC.20438	d__Bacteria;p__Spirochaetota;c__Spirochaetia;o__Treponematales;f__Treponemataceae;g__Treponema_D;s__Treponema_D sp902789325	1738.93	1195.44	1210.79	1211.75	1061.22	1385.61	1014.19	1121.25	2293.52	0	314.89	0	524.957	566.636	630.693	1826.81	801.863	803.364
RGMC.20459	d__Bacteria;p__Bacteroidota;c__Bacteroidia;o__Bacteroidales;f__Bacteroidaceae;g__Ga6A1;s__Ga6A1 sp900102385	0	0	0	0	0	0	220.104	0	0	0	0	0	0	0	0	0	0	0
RGMC.20465	d__Bacteria;p__Bacillota_A;c__Clostridia;o__Christensenellales;f__Aristaeellaceae;g__RUG563;s__RUG563 sp902795275	1533.41	1978.42	1175.92	2027.83	2851.41	1813.11	1797.38	1439.1	1379.79	1887.03	2694.38	2903.86	2285.49	2295.62	2500.89	1456.62	1740.19	1675.62
RGMC.20469	d__Bacteria;p__Bacillota_A;c__Clostridia;o__Oscillospirales;f__Oscillospiraceae;g__Limivicinus;s__Limivicinus sp902802215	0	441.445	0	546.031	481.645	569.122	417.493	516.744	0	0	519.143	0	0	479.544	421.496	0	398.41	391.733
RGMC.20472	d__Bacteria;p__Bacillota_A;c__Clostridia;o__Peptostreptococcales;f__Anaerovoracaceae;g__Lentihominibacter;s__Lentihominibacter sp902763505	0	317.179	0	324.174	341.096	347.764	319.582	402.654	0	798.314	657.075	724.037	541.054	581.811	551.482	0	506.161	501.573
RGMC.20479	d__Bacteria;p__Bacillota_A;c__Clostridia;o__Oscillospirales;f__Ruminococcaceae;g__HUN007;s__HUN007 sp902789705	370.331	502.12	483.597	424.188	564.784	433.938	566.352	414.527	389.303	383.346	348.624	482.719	332.494	357.895	351.095	414.184	370.33	372.976
RGMC.20488	d__Bacteria;p__Bacillota_A;c__Clostridia;o__Lachnospirales;f__Lachnospiraceae;g__UBA1712;s__UBA1712 sp902789785	1284.2	938.773	721.542	786.625	473.224	784.519	595.7	789.561	1253.46	170.884	178.414	0	175.894	164.84	212.711	969.551	442.885	439.694
RGMC.20496	d__Bacteria;p__Bacteroidota;c__Bacteroidia;o__Bacteroidales;f__F082;g__Limimorpha;s__Limimorpha sp902789915	123.965	0	0	0	0	0	0	0	0	0	0	0	0	0	0	0	0	0
RGMC.2050	d__Archaea;p__Methanobacteriota;c__Methanobacteria;o__Methanobacteriales;f__Methanobacteriaceae;g__Methanobrevibacter;s__	0	229.757	0	616.042	524.689	964.095	578.105	1115.63	254.053	497.011	454.358	452.899	427.366	517.241	429.396	319.602	437.744	438.826
RGMC.20515	d__Bacteria;p__Bacteroidota;c__Bacteroidia;o__Bacteroidales;f__UBA932;g__Cryptobacteroides;s__Cryptobacteroides sp900319375	120.727	0	0	0	0	0	0	0	128.442	0	0	0	0	0	0	114.735	0	0
RGMC.20530	d__Bacteria;p__Bacteroidota;c__Bacteroidia;o__Bacteroidales;f__P3;g__UBA1711;s__UBA1711 sp902790215	514.758	334.766	343.328	0	0	209.987	0	235.359	332.922	0	0	0	0	0	0	301.319	0	0
RGMC.20541	d__Bacteria;p__Bacillota_A;c__Clostridia;o__Christensenellales;f__Aristaeellaceae;g__Firm-10;s__Firm-10 sp902790345	0	251.767	0	479.531	561.794	385.197	417.639	318.317	0	1916.31	1099.33	1219.17	775.801	721.921	861.857	0	698.02	696.027
RGMC.20545	d__Bacteria;p__Verrucomicrobiota;c__Kiritimatiellia;o__RFP12;f__UBA1067;g__RUG572;s__RUG572 sp902763655	1144.05	677.159	741.091	692.345	822.455	492.464	893.647	413.666	834.72	1111.53	767.101	797.22	962.098	834.22	804.926	1002.91	779.769	776.36
RGMC.20548	d__Bacteria;p__Spirochaetota;c__Spirochaetia;o__CADAEX01;f__CADAEX01;g__CADAEX01;s__CADAEX01 sp902787125	0	0	0	0	0	0	165.726	0	0	0	0	0	0	0	0	0	0	0
RGMC.20557	d__Bacteria;p__Bacillota_A;c__Clostridia;o__Christensenellales;f__Aristaeellaceae;g__UBA2862;s__UBA2862 sp902790525	7796.3	15439.8	25560.5	11482.5	5910.64	8423.9	3872.05	4706.85	6823.55	0	6398.28	7216.96	4435.43	2582.77	6142.13	8311.18	8993.95	9013.98
RGMC.20564	d__Bacteria;p__Bacteroidota;c__Bacteroidia;o__Bacteroidales;f__UBA932;g__Bact-11;s__Bact-11 sp002361615	0	0	0	0	0	0	189.24	165.386	0	349.186	210.276	208.673	201.672	218.823	186.411	0	183.967	184.782
RGMC.20567	d__Bacteria;p__Bacteroidota;c__Bacteroidia;o__Bacteroidales;f__SZUA-534;g__RUG13583;s__RUG13583 sp902790595	189.795	144.247	170.658	0	0	0	0	251.017	208.941	0	0	0	0	0	0	214.794	0	0
RGMC.2057	d__Bacteria;p__Bacteroidota;c__Bacteroidia;o__Bacteroidales;f__Bacteroidaceae;g__Prevotella;s__Prevotella sp900315105	411.73	299.02	236.573	332.673	351.146	446.579	507.959	380.866	531.507	0	0	303.689	390.828	329.455	369.236	726.599	435.71	429.596
RGMC.20601	d__Bacteria;p__Bacteroidota;c__Bacteroidia;o__Bacteroidales;f__UBA932;g__Cryptobacteroides;s__Cryptobacteroides sp902761655	0	0	0	0	0	0	0	0	0	182.277	138.383	0	154.301	160.976	157.032	0	0	0
RGMC.20602	d__Bacteria;p__Bacillota_A;c__Clostridia;o__Oscillospirales;f__Oscillospiraceae;g__Limivicinus;s__Limivicinus sp900317375	0	333.347	318.819	445.537	460.847	349.394	348.779	326.645	0	721.18	651.199	663.312	487.807	530.929	478.482	268.553	485.041	486.259
RGMC.20606	d__Bacteria;p__Bacteroidota;c__Bacteroidia;o__Bacteroidales;f__Paludibacteraceae;g__UBA1181;s__UBA1181 sp002310215	2219.73	1285.63	981.459	1448	1248.54	1302.74	1774.17	1341.45	1830.75	5468.14	1421.95	1584.57	1841.66	2173.97	1663.68	2153	1764.12	1769.79
RGMC.20611	d__Bacteria;p__Bacillota_A;c__Clostridia;o__Oscillospirales;f__Oscillospiraceae;g__Limivicinus;s__Limivicinus sp900317375	0	252.89	264.693	325.475	321.141	263.001	251.96	231.249	0	418.221	451.671	453.766	395.352	398.074	356.925	211.972	317.401	307.751
RGMC.20622	d__Bacteria;p__Bacillota_A;c__Clostridia;o__Saccharofermentanales;f__Saccharofermentanaceae;g__Saccharofermentans;s__Saccharofermentans sp015069205	0	0	0	0	0	0	0	0	0	337.527	0	0	0	0	0	0	0	0
RGMC.20662	d__Bacteria;p__Bacteroidota;c__Bacteroidia;o__Bacteroidales;f__UBA932;g__Cryptobacteroides;s__Cryptobacteroides sp902761655	0	0	0	0	0	0	0	0	0	0	0	0	0	0	111.158	0	0	0
RGMC.20664	d__Bacteria;p__Bacteroidota;c__Bacteroidia;o__Bacteroidales;f__Bacteroidaceae;g__Ga6A1;s__Ga6A1 sp900102385	0	0	0	0	0	0	192.784	0	0	0	0	0	0	0	0	0	0	0
RGMC.20671	d__Bacteria;p__Bacillota_A;c__Clostridia;o__Oscillospirales;f__Oscillospiraceae;g__Limivicinus;s__Limivicinus sp900319695	0	268.101	0	371.918	377.953	279.012	303.083	223.063	0	0	313.257	0	0	239.21	0	0	286.696	281.919
RGMC.20672	d__Bacteria;p__Bacteroidota;c__Bacteroidia;o__Bacteroidales;f__P3;g__UBA1711;s__UBA1711 sp902790215	746.637	466.724	441.581	0	0	292.521	0	295.618	476.421	0	0	0	0	0	0	449.654	0	0
RGMC.20679	d__Bacteria;p__Bacteroidota;c__Bacteroidia;o__Bacteroidales;f__P3;g__UBA1217;s__UBA1217 sp902788805	230.36	157.866	125.191	0	0	190.686	0	145.749	262.027	0	0	0	0	0	0	172.53	0	0
RGMC.20680	d__Bacteria;p__Bacillota_A;c__Clostridia;o__Oscillospirales;f__Oscillospiraceae;g__Limivicinus;s__Limivicinus sp900317375	0	318.157	325.762	407.105	389.591	330.43	312.19	284.719	0	576.184	577.245	585.571	466.233	467.381	444.768	274.005	437.616	433.603
RGMC.20684	d__Bacteria;p__Bacteroidota;c__Bacteroidia;o__Bacteroidales;f__ML635J-15;g__Bact-19;s__Bact-19 sp902791865	0	0	0	0	0	0	0	0	0	0	252.74	271.432	424.176	495.271	375.736	0	0	0
RGMC.20688	d__Bacteria;p__Bacteroidota;c__Bacteroidia;o__Bacteroidales;f__Bacteroidaceae;g__Ga6A1;s__Ga6A1 sp900102385	0	0	0	0	0	0	182.085	0	0	0	0	0	0	0	0	0	0	0
RGMC.20729	d__Bacteria;p__Bacteroidota;c__Bacteroidia;o__Bacteroidales;f__P3;g__UBA1217;s__UBA1217 sp902788805	269.76	184.9	162.177	0	0	219.211	0	174.583	307.044	0	0	0	0	0	0	196.525	0	0
RGMC.20741	d__Bacteria;p__Bacteroidota;c__Bacteroidia;o__Bacteroidales;f__WCHB1-69;g__UBA1756;s__UBA1756 sp900321845	0	0	0	238.984	566.814	0	669.067	0	0	417.362	374.429	380.328	430.861	478.596	395.988	177.975	392.31	388.948
RGMC.20781	d__Bacteria;p__Bacteroidota;c__Bacteroidia;o__Bacteroidales;f__Paludibacteraceae;g__RF16;s__RF16 sp900321775	338.809	210.743	235.747	0	0	180.167	0	154.118	325.097	0	0	0	0	0	0	253.656	0	0
RGMC.20831	d__Bacteria;p__Bacteroidota;c__Bacteroidia;o__Bacteroidales;f__Muribaculaceae;g__Sodaliphilus;s__Sodaliphilus sp902793405	0	261.132	0	0	0	0	0	0	0	0	0	0	0	0	0	0	0	0
RGMC.20836	d__Bacteria;p__Bacteroidota;c__Bacteroidia;o__Bacteroidales;f__Bacteroidaceae;g__Ga6A1;s__Ga6A1 sp900102385	0	0	0	0	0	0	189.143	0	0	0	0	0	0	0	0	0	0	0
RGMC.20843	d__Bacteria;p__Spirochaetota;c__Spirochaetia;o__Treponematales;f__Treponemataceae;g__Treponema_D;s__Treponema_D bryantii_B	814.962	518.214	535.537	596.159	563.595	708.943	717.011	705.636	1012.18	0	169.08	191.028	332.942	398.385	325.025	930.298	422.808	420.152
RGMC.20850	d__Bacteria;p__Bacteroidota;c__Bacteroidia;o__Bacteroidales;f__P3;g__UBA1217;s__UBA1217 sp902788805	275.382	181.006	0	0	0	208.992	0	159.524	298.162	0	0	0	0	0	0	0	0	0
RGMC.20851	d__Bacteria;p__Spirochaetota;c__Spirochaetia;o__Treponematales;f__Treponemataceae;g__Treponema_D;s__Treponema_D bryantii_C	1230.71	788.612	748.459	853.36	796.048	981.375	936.37	937.505	1576.04	0	0	0	451.588	530.645	462.136	1261.73	587.504	587.297
RGMC.20852	d__Bacteria;p__Bacteroidota;c__Bacteroidia;o__Bacteroidales;f__Bacteroidaceae;g__UBA1179;s__UBA1179 sp902763885	642.672	391.264	425.509	444.144	388.103	523.419	530.443	563.04	862.034	0	0	0	355.007	0	327.725	603.404	293.308	293.028
RGMC.20859	d__Bacteria;p__Spirochaetota;c__Spirochaetia;o__Treponematales;f__Treponemataceae;g__Treponema_D;s__Treponema_D bryantii_A	2226.82	1364.55	1276.83	1438.45	1302.8	1660.84	1623.68	1589.28	2981.02	532.736	557.681	503.729	806.121	817.405	764.187	2222.23	1025.06	1023.94
RGMC.20879	d__Bacteria;p__Bacteroidota;c__Bacteroidia;o__Bacteroidales;f__Bacteroidaceae;g__Ga6A1;s__Ga6A1 sp900102385	0	0	0	0	0	0	245.558	0	0	0	0	0	0	0	0	0	0	0
RGMC.20891	d__Bacteria;p__Spirochaetota;c__Spirochaetia;o__Treponematales;f__Treponemataceae;g__Treponema_D;s__Treponema_D sp000260795	0	0	0	0	0	0	0	0	0	0	343	0	0	0	0	0	0	0
RGMC.20893	d__Bacteria;p__Bacillota_A;c__Clostridia;o__Lachnospirales;f__Lachnospiraceae;g__AC2028;s__AC2028 sp902794095	7520.44	4967.22	4643.31	3634.3	2192.55	3340.98	1860.81	2575.93	5517.93	0	383.507	471.811	435.799	343.938	533.665	4854.5	1887.12	1833.95
RGMC.20921	d__Bacteria;p__Bacteroidota;c__Bacteroidia;o__Bacteroidales;f__Bacteroidaceae;g__Ga6A1;s__Ga6A1 sp900102385	196.476	0	0	0	0	0	221.592	0	185.422	0	0	0	0	0	0	0	0	0
RGMC.20936	d__Bacteria;p__Bacteroidota;c__Bacteroidia;o__Bacteroidales;f__Bacteroidaceae;g__Ga6A1;s__Ga6A1 sp900102385	0	0	0	0	0	0	230.201	0	0	0	0	0	0	0	0	0	0	0
RGMC.20950	d__Bacteria;p__Bacteroidota;c__Bacteroidia;o__Bacteroidales;f__P3;g__UBA1217;s__UBA1217 sp902788805	207.425	144.013	0	0	0	166.347	0	144.941	231.517	0	0	0	0	0	0	0	0	0
RGMC.20989	d__Bacteria;p__Bacteroidota;c__Bacteroidia;o__Bacteroidales;f__Bacteroidaceae;g__Ga6A1;s__Ga6A1 sp900102385	0	0	0	0	0	0	203.22	0	0	0	0	0	0	0	0	0	0	0
RGMC.20990	d__Bacteria;p__Bacillota_A;c__Clostridia;o__Christensenellales;f__Aristaeellaceae;g__RUG563;s__RUG563 sp902795275	747.763	1095.98	950.745	1094.56	1328.17	1009.31	951.721	916.449	687.1	978.162	1343.88	1374.34	1067.2	1142.4	1151.35	791.035	945.622	934.939
RGMC.20998	d__Bacteria;p__Fibrobacterota;c__Fibrobacteria;o__Fibrobacterales;f__Fibrobacteraceae;g__Fibrobacter;s__Fibrobacter succinogenes_P	2321.88	1419.85	1472.88	1086.38	1100.68	976.901	1377.24	1154.7	1897.32	1794.31	905.783	1050.27	1358.32	1540.18	1123.69	2011.89	1222.34	1228.55
RGMC.21	d__Bacteria;p__Bacillota_A;c__Clostridia;o__Lachnospirales;f__Lachnospiraceae;g__RUG11977;s__RUG11977 sp016287095	2696	1731.26	1489.24	1680.64	1643.16	1941.57	1898.2	2106.75	3051.98	731.035	605.837	875.136	1213.05	1339.39	1229.78	2380.84	1252.75	1244.01
RGMC.210	d__Bacteria;p__Bacillota_A;c__Clostridia;o__Peptostreptococcales;f__Anaerovoracaceae;g__RGIG2707;s__RGIG2707 sp016281165	0	0	0	0	0	0	0	0	0	283.826	236.196	244.204	211.163	197.566	189.333	0	0	0
RGMC.21014	d__Bacteria;p__Bacillota_A;c__Clostridia;o__Christensenellales;f__Aristaeellaceae;g__SFMI01;s__SFMI01 sp902764185	0	0	0	0	0	0	0	0	0	0	486.021	0	0	0	0	0	0	0
RGMC.21020	d__Bacteria;p__Bacillota_I;c__Bacilli_A;o__RFN20;f__CAG-826;g__UBA3207;s__UBA3207 sp902768335	0	0	0	0	424.939	317.528	532.18	404.861	552.46	0	0	0	0	0	0	578.983	0	0
RGMC.21041	d__Archaea;p__Methanobacteriota;c__Methanobacteria;o__Methanobacteriales;f__Methanobacteriaceae;g__CADBMS01;s__CADBMS01 sp902795935	0	0	0	0	0	0	0	0	0	0	0	898.005	0	0	648.606	0	0	0
RGMC.21045	d__Bacteria;p__Bacillota_A;c__Clostridia;o__Lachnospirales;f__Lachnospiraceae;g__CAG-411;s__CAG-411 sp902795895	0	0	0	0	0	0	0	0	0	0	292.712	0	0	0	0	0	0	0
RGMC.2105	d__Bacteria;p__Bacteroidota;c__Bacteroidia;o__Bacteroidales;f__Bacteroidaceae;g__UBA2918;s__UBA2918 sp900313715	459.611	247.895	308.174	223.971	0	205.229	249.42	155.799	426.293	0	0	0	0	0	0	342.516	174.421	176.048
RGMC.21068	d__Bacteria;p__Pseudomonadota;c__Alphaproteobacteria;o__UBA3830;f__UBA3830;g__CADBNZ01;s__CADBNZ01 sp902796155	596.337	245.298	154.112	329.221	314.711	303.905	344.351	195.698	441.198	0	246.466	193.149	310.061	228.342	274.733	438.158	308.22	311.961
RGMC.21074	d__Bacteria;p__Spirochaetota;c__Spirochaetia;o__Sphaerochaetales;f__Sphaerochaetaceae;g__UBA9732;s__UBA9732 sp902796335	234.55	0	0	553.527	533.963	320.418	913.758	288.549	520.019	514.749	347.076	432.079	621.906	512.011	560.485	652.637	477.259	474.454
RGMC.21088	d__Bacteria;p__Bacillota_A;c__Clostridia;o__Lachnospirales;f__Lachnospiraceae;g__Anaerobutyricum;s__Anaerobutyricum sp902796415	0	3267.5	2340.66	2933.53	2549.03	2926.05	1465.16	1952.06	1297.5	1719.87	3714.68	4362.34	2748.32	1857.82	3867.5	1564.02	2720.89	2637.99
RGMC.2112	d__Bacteria;p__Bacteroidota;c__Bacteroidia;o__Bacteroidales;f__Paludibacteraceae;g__RF16;s__RF16 sp900321775	629.142	385.588	428.178	323.611	0	320.28	287.138	252.409	606.333	0	0	0	0	0	0	470.488	226.827	219.593
RGMC.21138	d__Bacteria;p__Bacillota_A;c__Clostridia;o__Peptostreptococcales;f__Anaerovoracaceae;g__Lentihominibacter;s__Lentihominibacter sp902796875	0	409.99	395.506	508.214	452.798	469.303	380.493	459.25	0	498.934	794.576	763.475	726.843	635.144	634.021	328.45	664.069	646.886
RGMC.21171	d__Bacteria;p__Bacillota_A;c__Clostridia;o__Oscillospirales;f__Acutalibacteraceae;g__UBA737;s__UBA737 sp016287385	0	0	0	0	0	0	0	0	0	103.146	0	0	0	0	0	0	0	0
RGMC.21172	d__Bacteria;p__Bacillota_A;c__Clostridia;o__Saccharofermentanales;f__Saccharofermentanaceae;g__Firm-16;s__Firm-16 sp016281535	0	354.311	309.871	352.938	405.24	343.533	275.947	303.956	143.083	628.498	546.921	582.294	336.551	379.223	403.186	202.158	399.586	390.845
RGMC.21174	d__Bacteria;p__Spirochaetota;c__Spirochaetia;o__Treponematales;f__Treponemataceae;g__Treponema_D;s__Treponema_D sp902797305	190.454	0	0	0	0	0	0	120.599	195.487	0	0	0	0	0	0	153.813	0	0
RGMC.21197	d__Bacteria;p__Bacillota_A;c__Clostridia;o__Lachnospirales;f__Lachnospiraceae;g__ISDg;s__ISDg sp902797475	0	0	0	628.027	1204.96	383.214	1021.32	343.765	0	4382.72	2647.09	2707.7	2671.65	2888.9	2571.79	0	755.611	747.916
RGMC.212	d__Bacteria;p__Bacillota_A;c__Clostridia;o__Oscillospirales;f__Acutalibacteraceae;g__Fimenecus;s__Fimenecus sp016290515	0	0	0	0	0	0	0	107.393	0	0	130.666	139.644	160.717	171.683	135.524	0	0	0
RGMC.2122	d__Bacteria;p__Bacteroidota;c__Bacteroidia;o__Bacteroidales;f__UBA932;g__Cryptobacteroides;s__Cryptobacteroides sp902785575	139.248	0	0	0	0	0	0	0	0	0	0	0	0	0	0	0	0	0
RGMC.21222	d__Bacteria;p__Bacillota_A;c__Clostridia;o__Oscillospirales;f__Oscillospiraceae;g__Limivicinus;s__Limivicinus sp900319695	229.457	291.643	0	402.784	413.249	297.662	334.925	233.83	0	0	0	0	0	0	0	0	303.339	306.095
RGMC.21254	d__Bacteria;p__Fibrobacterota;c__Fibrobacteria;o__Fibrobacterales;f__Fibrobacteraceae;g__Fibrobacter;s__Fibrobacter sp002210345	570.348	340.033	320.101	288.684	272.932	387.688	322.083	396.826	644.052	0	0	0	0	0	0	444.569	172.106	165.759
RGMC.21266	d__Bacteria;p__Bacteroidota;c__Bacteroidia;o__Bacteroidales;f__Bacteroidaceae;g__UBA4372;s__UBA4372 sp902776455	0	0	0	0	0	0	0	0	131.195	0	0	0	0	0	0	0	0	0
RGMC.21280	d__Bacteria;p__Bacteroidota;c__Bacteroidia;o__Bacteroidales;f__P3;g__UBA1217;s__UBA1217 sp902788805	232.203	159.609	0	0	0	185.908	0	134.814	256.893	0	0	0	0	0	0	0	0	0
RGMC.21286	d__Bacteria;p__Bacteroidota;c__Bacteroidia;o__Bacteroidales;f__UBA932;g__Cryptobacteroides;s__Cryptobacteroides sp902785575	223.696	134.977	153.213	0	0	0	0	0	170.121	0	0	0	0	0	0	0	0	0
RGMC.21288	d__Bacteria;p__Bacteroidota;c__Bacteroidia;o__Bacteroidales;f__P3;g__UBA1711;s__UBA1711 sp902790215	578.951	379.762	393.173	0	0	244.967	0	243.264	399.469	0	0	0	0	0	0	342.66	0	0
RGMC.21300	d__Bacteria;p__Bacteroidota;c__Bacteroidia;o__Bacteroidales;f__P3;g__UBA1217;s__UBA1217 sp902788805	223.649	149.379	0	0	0	182.088	0	168.666	238.358	0	0	0	0	0	0	0	0	0
RGMC.21303	d__Bacteria;p__Bacteroidota;c__Bacteroidia;o__Bacteroidales;f__Bacteroidaceae;g__Ga6A1;s__Ga6A1 sp900102385	0	0	0	0	0	0	711.961	0	0	0	0	0	0	0	0	0	0	0
RGMC.21316	d__Bacteria;p__Bacteroidota;c__Bacteroidia;o__Bacteroidales;f__P3;g__UBA1217;s__UBA1217 sp902788805	264.289	184.162	0	0	0	213.858	0	160.871	315.036	0	0	0	0	0	0	200.527	0	0
RGMC.21345	d__Bacteria;p__Actinomycetota;c__Coriobacteriia;o__Coriobacteriales;f__Eggerthellaceae;g__UBA9715;s__UBA9715 sp902764575	0	264.733	254.524	313.153	0	349.233	0	402.49	0	0	558.631	0	0	0	0	0	0	0
RGMC.21357	d__Bacteria;p__Bacteroidota;c__Bacteroidia;o__Bacteroidales;f__F082;g__Limimorpha;s__Limimorpha sp902799345	0	0	0	0	0	0	0	0	0	0	0	0	0	0	274.066	0	0	0
RGMC.21368	d__Bacteria;p__Bacillota_A;c__Clostridia;o__Christensenellales;f__Aristaeellaceae;g__RUG563;s__RUG563 sp902764565	2818.27	2513.71	2794.1	2280.7	2683.24	2402.85	2288.55	2113.34	2624.72	3376.84	3242.86	3297.75	2570.13	2661.23	2732.45	2788.04	2729.42	2709.04
RGMC.21372	d__Bacteria;p__Bacillota_A;c__Clostridia;o__Oscillospirales;f__Oscillospiraceae;g__Limivicinus;s__Limivicinus sp900317375	0	439.123	427.1	619.662	637.781	450.867	466.999	396.001	0	1231	972.647	1032.86	746.821	758.03	732.026	385.787	682.561	684.292
RGMC.21374	d__Bacteria;p__Bacteroidota;c__Bacteroidia;o__Bacteroidales;f__UBA932;g__Bact-11;s__Bact-11 sp002361615	0	0	0	0	0	0	0	0	0	220.997	172.846	150.786	162.621	188.345	140.004	0	143.598	136.589
RGMC.2138	d__Bacteria;p__Bacillota_A;c__Clostridia;o__Oscillospirales;f__Ruminococcaceae;g__Hominimerdicola;s__Hominimerdicola alba_A	0	631.372	757.903	417.418	520.458	394.421	321.48	427.189	264.28	0	349.309	353.808	269.795	0	288.607	0	281.389	280.821
RGMC.21391	d__Bacteria;p__Bacteroidota;c__Bacteroidia;o__Bacteroidales;f__Bacteroidaceae;g__Prevotella;s__Prevotella sp902799765	252.229	119.923	115.229	169.119	132.19	161.008	128.552	131.691	246.114	0	0	0	0	0	0	209.731	0	0
RGMC.21396	d__Bacteria;p__Bacillota_A;c__Clostridia;o__Oscillospirales;f__Oscillospiraceae;g__Limivicinus;s__Limivicinus sp900317375	0	372.471	346.504	495.032	488.536	374.812	380.08	346.469	0	755.986	699.589	718.773	539.086	582.958	531.129	307.949	520.642	514.177
RGMC.214	d__Bacteria;p__Bacteroidota;c__Bacteroidia;o__Bacteroidales;f__UBA932;g__Cryptobacteroides;s__Cryptobacteroides sp902761655	0	0	0	0	0	0	0	0	0	157.028	121.682	0	0	0	130.345	0	0	0
RGMC.2142	d__Bacteria;p__Bacillota_A;c__Clostridia;o__Peptostreptococcales;f__Anaerovoracaceae;g__RGIG5755;s__	0	923.583	1809.3	939.748	999.317	1147.13	683.007	945.701	293.285	1474.42	1361.15	1555.28	1160.63	1151.24	1192.61	452.304	1184.73	1167.28
RGMC.21431	d__Bacteria;p__Bacillota_A;c__Clostridia;o__Oscillospirales;f__Oscillospiraceae;g__Limivicinus;s__Limivicinus sp900317375	0	388.788	366.948	518.534	508.961	397.684	399.256	368.589	0	730.782	711.9	722.907	550.76	603.774	544.717	325.547	539.374	526.35
RGMC.2146	d__Bacteria;p__Bacteroidota;c__Bacteroidia;o__Bacteroidales;f__F082;g__Limimorpha;s__Limimorpha sp900315175	209.89	0	0	0	0	201.262	0	287.332	347.437	0	0	0	0	0	0	264.278	0	0
RGMC.21488	d__Bacteria;p__Bacteroidota;c__Bacteroidia;o__Bacteroidales;f__P3;g__UBA1217;s__UBA1217 sp902788805	209.751	142.93	0	0	0	170.466	0	134.827	232.75	0	0	0	0	0	0	0	0	0
RGMC.21493	d__Bacteria;p__Planctomycetota;c__Planctomycetia;o__Pirellulales;f__Thermoguttaceae;g__RUG369;s__RUG369 sp902786505	160.287	0	0	0	0	0	0	0	0	0	0	0	0	0	0	0	0	0
RGMC.21496	d__Bacteria;p__Bacteroidota;c__Bacteroidia;o__Bacteroidales;f__UBA932;g__Cryptobacteroides;s__Cryptobacteroides sp902761655	0	0	0	0	0	0	0	0	0	151.086	119.026	0	132.519	0	127.654	0	0	0
RGMC.21503	d__Bacteria;p__Bacteroidota;c__Bacteroidia;o__Bacteroidales;f__P3;g__UBA1711;s__UBA1711 sp902790215	910.61	594.772	585.618	0	0	324.713	0	322.158	579.935	0	0	0	0	0	0	505.685	0	0
RGMC.21509	d__Bacteria;p__Bacteroidota;c__Bacteroidia;o__Bacteroidales;f__Bacteroidaceae;g__Prevotella;s__Prevotella sp902801155	323.818	231.367	172.511	253.695	270.773	327.168	372.345	272.785	390.513	0	0	224.213	289.18	245.354	278.484	560.935	326.573	316.274
RGMC.21510	d__Bacteria;p__Bacillota_A;c__Clostridia;o__Christensenellales;f__Aristaeellaceae;g__UBA2862;s__UBA2862 sp902801165	0	0	269.14	0	0	0	0	0	0	0	525.704	0	0	0	0	0	0	0
RGMC.21536	d__Bacteria;p__Bacillota_A;c__Clostridia;o__Lachnospirales;f__Lachnospiraceae;g__Porcincola;s__Porcincola sp902801515	0	848.713	869.156	1246.33	1089.31	1245.68	1039.42	1691.93	563.238	1675.88	1311.25	1474.74	1105.77	1245.54	1208.67	748.4	1309.74	1298.32
RGMC.21541	d__Bacteria;p__Bacteroidota;c__Bacteroidia;o__Bacteroidales;f__P3;g__UBA1217;s__UBA1217 sp902788805	254.705	173.734	0	0	0	201.868	0	151.254	278.817	0	0	0	0	0	0	0	0	0
RGMC.21550	d__Bacteria;p__Bacillota_A;c__Clostridia;o__Oscillospirales;f__Oscillospiraceae;g__Limivicinus;s__Limivicinus sp900319695	0	419.955	0	666.652	691.601	460.596	541.181	282.667	0	0	0	0	0	0	0	0	536.017	529.861
RGMC.21575	d__Bacteria;p__Bacillota_A;c__Clostridia;o__Lachnospirales;f__Lachnospiraceae;g__Moryella;s__Moryella sp902780465	0	1407.27	1370.4	1701.35	1731.27	1572.68	1429.33	1844.35	0	0	1171.76	0	0	0	0	0	1538.55	1513.2
RGMC.2158	d__Bacteria;p__Bacteroidota;c__Bacteroidia;o__Bacteroidales;f__SZUA-534;g__RUG13583;s__RUG13583 sp017527435	218.213	151.879	159.479	0	0	0	0	166.672	225.068	0	0	0	0	0	0	197.25	0	0
RGMC.21587	d__Bacteria;p__Bacteroidota;c__Bacteroidia;o__Bacteroidales;f__P3;g__UBA1217;s__UBA1217 sp902788805	253.215	167.455	0	0	0	188.194	0	141.37	274.75	0	0	0	0	0	0	0	0	0
RGMC.21603	d__Bacteria;p__Bacillota_A;c__Clostridia;o__Oscillospirales;f__Oscillospiraceae;g__Limivicinus;s__Limivicinus sp900317375	393.637	821.411	964.398	987.453	992.044	779.927	689.422	651.154	340.186	1317.89	1565.2	1591.86	1318.1	1244.26	1216.9	566.738	864.605	863.409
RGMC.21606	d__Bacteria;p__Bacillota_A;c__Clostridia;o__Oscillospirales;f__Oscillospiraceae;g__Limivicinus;s__Limivicinus sp902802215	0	1556.01	0	1888.79	1493.49	1716.15	1242.37	1173.5	0	0	2144.74	0	1716.85	1571.9	2075.42	0	1683.02	1654.59
RGMC.21635	d__Bacteria;p__Bacteroidota;c__Bacteroidia;o__Bacteroidales;f__Bacteroidaceae;g__Ga6A1;s__Ga6A1 sp900102385	0	0	0	0	0	0	223.487	0	0	0	0	0	0	0	0	0	0	0
RGMC.21640	d__Bacteria;p__Bacillota_A;c__Clostridia;o__Oscillospirales;f__Oscillospiraceae;g__Limivicinus;s__Limivicinus sp900319695	259.087	308.297	0	415.793	434.147	319.744	356.663	254.927	0	0	383.787	0	0	0	0	0	365.115	374.918
RGMC.21656	d__Bacteria;p__Bacteroidota;c__Bacteroidia;o__Bacteroidales;f__UBA932;g__Cryptobacteroides;s__Cryptobacteroides sp900318015	275.181	184.989	181.291	203.015	213.291	187.351	202.366	184.106	192.207	369.143	299.421	287.985	286.13	292.562	268.675	243.707	207.709	205.935
RGMC.21667	d__Bacteria;p__Planctomycetota;c__Planctomycetia;o__Pirellulales;f__Thermoguttaceae;g__RUG369;s__RUG369 sp902803085	300.986	166.665	132.56	202.815	0	201.1	192.179	217.45	247.435	197.838	142.451	0	152.383	160.171	114.59	281.707	160.085	154.213
RGMC.21670	d__Bacteria;p__Bacillota_A;c__Clostridia;o__Lachnospirales;f__Lachnospiraceae;g__UBA3633;s__UBA3633 sp902803205	0	0	549.857	0	0	0	0	0	0	0	0	0	0	0	0	0	0	0
RGMC.21694	d__Bacteria;p__Bacteroidota;c__Bacteroidia;o__Bacteroidales;f__P3;g__UBA1711;s__UBA1711 sp902803395	0	0	0	0	152.596	0	144.665	0	0	307.218	0	0	180.072	140.967	195.549	0	139.159	143.264
RGMC.21699	d__Bacteria;p__Bacillota_A;c__Clostridia;o__Lachnospirales;f__Lachnospiraceae;g__UBA1267;s__UBA1267 sp902803485	0	0	0	0	340.864	0	261.036	301.396	0	683.861	454.889	499.389	353.851	323.211	375.054	0	409.901	403.45
RGMC.217	d__Bacteria;p__Bacillota_C;c__Negativicutes;o__Selenomonadales;f__Selenomonadaceae;g__RUG12372;s__RUG12372 sp016286075	0	163.321	265.037	179.874	225.278	136.072	0	175.907	0	0	157.309	0	0	0	0	0	0	0
RGMC.21741	d__Bacteria;p__Bacteroidota;c__Bacteroidia;o__Bacteroidales;f__Bacteroidaceae;g__UBA4372;s__	150.475	108.863	0	0	0	0	134.533	107.642	178.353	0	104.199	128.133	154.8	174.892	157.819	148.418	0	0
RGMC.21746	d__Bacteria;p__Bacteroidota;c__Bacteroidia;o__Bacteroidales;f__F082;g__Limimorpha;s__Limimorpha sp902774295	680.321	274.802	0	560.956	353.11	636.449	715.458	868.155	1123.01	171.649	0	0	201.345	217.016	158.33	831.475	373.327	372.693
RGMC.21748	d__Bacteria;p__Bacillota_A;c__Clostridia;o__Lachnospirales;f__Lachnospiraceae;g__AC2028;s__	408.877	818.85	1039.63	509.767	516.705	537.101	370.284	526.926	494.466	0	0	0	0	0	0	315.061	294.427	295.959
RGMC.2182	d__Bacteria;p__Bacteroidota;c__Bacteroidia;o__Bacteroidales;f__Bacteroidaceae;g__UBA2918;s__UBA2918 sp900313715	579.182	322.907	419.098	284.88	0	256.919	291.546	0	564.723	0	0	0	0	0	0	472.589	228.232	224.409
RGMC.21865	d__Bacteria;p__Bacteroidota;c__Bacteroidia;o__Bacteroidales;f__UBA932;g__Bact-11;s__Bact-11 sp002361615	0	0	0	0	0	0	248.1	218.923	0	413.284	268.616	0	263.536	286.163	237.021	0	251.74	247.971
RGMC.219	d__Bacteria;p__Desulfobacterota;c__Desulfovibrionia;o__Desulfovibrionales;f__Desulfovibrionaceae;g__Desulfovibrio;s__	463.68	363.071	219.801	559.765	306.313	607.784	445.451	676.248	698.398	366.151	196.843	0	178.857	221.034	164.311	379.017	273.31	271.231
RGMC.21966	d__Bacteria;p__Bacillota_A;c__Clostridia;o__Christensenellales;f__Aristaeellaceae;g__UBA2862;s__UBA2862 sp902765305	0	2408.26	3003.34	1776.89	0	1389.69	0	800.673	0	0	0	0	0	0	0	0	0	0
RGMC.220	d__Bacteria;p__Bacillota_A;c__Clostridia;o__Oscillospirales;f__Oscillospiraceae;g__RGIG6375;s__RGIG6375 sp016290695	1028.91	1005.64	1423.32	644.281	468.605	690.095	469.772	756.458	918.529	219.416	166.187	0	224.026	228.937	232.199	862.644	414.601	405.358
RGMC.22010	d__Bacteria;p__Bacillota_A;c__Clostridia;o__Lachnospirales;f__Lachnospiraceae;g__Butyrivibrio;s__Butyrivibrio sp000421405	4471.86	2986.38	2329.13	3459.89	3281.68	2558.95	2545.63	1959.1	6534.38	0	1644.85	1983.29	1949.15	0	2187.95	4427.95	2604.84	2535.11
RGMC.22020	d__Bacteria;p__Bacteroidota;c__Bacteroidia;o__Bacteroidales;f__P3;g__UBA1217;s__UBA1217 sp902788805	391.592	265.074	192.083	0	0	313.539	0	251.612	445.648	0	0	0	0	0	0	281.07	0	0
RGMC.22032	d__Bacteria;p__Bacillota_A;c__Clostridia;o__Christensenellales;f__Aristaeellaceae;g__UBA2862;s__UBA2862 sp002350605	1637.45	3532.67	6438.89	3111.4	2167.18	2753.01	1765.84	3935.1	2194.84	521.301	1579.69	1519.03	1406.63	1376.8	1470.34	2017.1	1743.02	1732.97
RGMC.22040	d__Bacteria;p__Bacillota_A;c__Clostridia;o__Lachnospirales;f__Lachnospiraceae;g__Butyrivibrio;s__Butyrivibrio sp000421405	4119.25	2671.6	2079.73	3137.22	2918.34	2299.85	2357.54	1789.02	6062.67	0	1365.35	0	1723.62	0	1934.71	4085.99	2326.66	2251.14
RGMC.2205	d__Bacteria;p__Bacillota_A;c__Clostridia;o__Peptostreptococcales;f__Anaerovoracaceae;g__RUG099;s__	0	688.761	1122.18	907.791	686.398	666.938	529.609	485.252	0	677.564	679.362	725.785	677.181	629.193	695.195	0	1239.72	1219.15
RGMC.22050	d__Bacteria;p__Bacillota_A;c__Clostridia;o__Oscillospirales;f__CAG-272;g__UMGS1696;s__UMGS1696 sp902782445	0	169.593	209.441	0	0	142.276	0	153.041	0	171.14	164.429	157.946	149.806	149.498	122.408	0	155.918	154.581
RGMC.22053	d__Bacteria;p__Bacillota_A;c__Clostridia;o__Lachnospirales;f__Lachnospiraceae;g__Butyrivibrio;s__Butyrivibrio sp000421405	5099.65	3314.2	2554.68	3969.44	3701.23	3040.35	3194.98	2625.7	7769.59	0	1687.66	0	2277.33	0	2521.49	5197.6	0	2830.28
RGMC.22070	d__Bacteria;p__Bacteroidota;c__Bacteroidia;o__Bacteroidales;f__Bacteroidaceae;g__Ga6A1;s__Ga6A1 sp900102385	0	0	0	0	0	0	231.635	0	0	0	0	0	0	0	0	0	0	0
RGMC.22079	d__Bacteria;p__Bacillota_A;c__Clostridia;o__Eubacteriales;f__Eubacteriaceae;g__Eubacterium;s__Eubacterium callanderi	3067.88	9077.17	5740.39	1756.65	0	3186.3	0	4519.94	2789.87	0	0	0	0	0	0	1660.52	0	0
RGMC.22105	d__Bacteria;p__Bacillota_A;c__Clostridia;o__Eubacteriales;f__Eubacteriaceae;g__Eubacterium;s__Eubacterium maltosivorans	0	0	838.531	0	0	0	0	0	0	0	0	0	0	0	0	0	0	0
RGMC.22112	d__Bacteria;p__Bacillota_A;c__Clostridia;o__Saccharofermentanales;f__Saccharofermentanaceae;g__Firm-16;s__Firm-16 sp016281535	0	324.359	296.713	332.257	385.157	324.355	267.982	277.051	0	576.841	497.899	537.426	311.546	354.204	369.668	182.818	352.32	345.138
RGMC.22134	d__Bacteria;p__Bacteroidota;c__Bacteroidia;o__Bacteroidales;f__WCHB1-69;g__UBA1756;s__UBA1756 sp900321845	0	0	0	161.148	359.258	0	359.72	0	0	256.356	230.872	242.27	253.103	251.587	245.548	124.306	261.039	249.873
RGMC.22138	d__Bacteria;p__Bacillota_A;c__Clostridia;o__Christensenellales;f__DTU072;g__CAG-1782;s__CAG-1782 sp902766325	0	0	0	80.2069	0	0	0	89.2739	144.92	0	0	0	0	0	0	107.009	0	0
RGMC.22147	d__Bacteria;p__Bacillota_A;c__Clostridia;o__Oscillospirales;f__Acutalibacteraceae;g__UBA737;s__UBA737 sp016287385	0	0	0	0	0	0	0	0	0	134.438	0	0	0	0	0	0	0	0
RGMC.22155	d__Bacteria;p__Bacillota_B;c__Dehalobacteriia;o__UBA7702;f__UBA7702;g__UBA7702;s__UBA7702 sp902766525	0	83.464	0	124.476	148.6	137.97	123.126	172.927	0	441.372	379.897	374.382	357.995	403.775	322.884	0	159.294	156.348
RGMC.22287	d__Bacteria;p__Bacillota_A;c__Clostridia;o__Lachnospirales;f__Lachnospiraceae;g__AC2028;s__AC2028 sp000702685	947.066	1529	1827.34	876.979	838.208	1099.67	834.571	1219.79	972.094	431.017	0	0	0	0	293.009	706.113	623.813	622.148
RGMC.22299	d__Bacteria;p__Bacillota_A;c__Clostridia;o__Oscillospirales;f__Oscillospiraceae;g__Limivicinus;s__Limivicinus sp900317375	0	448.887	470.95	593.696	603.706	439.776	461.217	391.016	0	1014.17	875.037	921.065	680.358	709.322	674.57	380.911	655.48	635.895
RGMC.22302	d__Bacteria;p__Bacillota_I;c__Bacilli_A;o__RFN20;f__CAG-826;g__UBA3207;s__UBA3207 sp902768335	0	0	0	593.634	707.587	494.117	679.395	441.553	922.623	0	0	0	0	0	0	971.39	570.54	573.163
RGMC.22320	d__Bacteria;p__Bacillota_A;c__Clostridia;o__Lachnospirales;f__Lachnospiraceae;g__NK4A144;s__NK4A144 sp000622025	0	0	1318.65	0	0	0	0	0	0	0	0	0	0	0	0	0	0	0
RGMC.22330	d__Bacteria;p__Bacteroidota;c__Bacteroidia;o__Bacteroidales;f__UBA932;g__Cryptobacteroides;s__Cryptobacteroides sp902761655	0	0	0	0	0	0	0	0	0	168.557	125.648	0	152.092	162.721	135.539	0	0	0
RGMC.22341	d__Bacteria;p__Bacteroidota;c__Bacteroidia;o__Bacteroidales;f__UBA932;g__Cryptobacteroides;s__Cryptobacteroides sp902785575	246.592	163.717	215.595	0	0	0	0	0	173.757	0	0	0	0	0	0	0	0	0
RGMC.22343	d__Bacteria;p__Bacillota_A;c__Clostridia;o__Oscillospirales;f__Oscillospiraceae;g__Limivicinus;s__Limivicinus sp900319465	0	3641.57	0	4954.04	3702.93	3106.46	2575.07	1459.43	0	0	5885.38	6541.27	3522.15	2708.01	5177.28	4537.47	5708.2	5611.21
RGMC.22344	d__Bacteria;p__Bacillota_A;c__Clostridia;o__Oscillospirales;f__Oscillospiraceae;g__UBA738;s__UBA738 sp902768805	468.712	1339.46	1347.99	1436.48	1024.62	1563.91	765.116	1215.34	560.478	475.188	639.021	725.331	483.189	435.936	554.76	764.921	1205.31	1203
RGMC.22356	d__Bacteria;p__Bacillota_A;c__Clostridia;o__Oscillospirales;f__Oscillospiraceae;g__Limivicinus;s__Limivicinus sp900317375	0	357.92	338.172	476.669	465.682	360.299	362.04	330.152	0	738.533	662.416	695.631	517.697	557.696	502.574	0	513.118	494.449
RGMC.22361	d__Bacteria;p__Bacteroidota;c__Bacteroidia;o__Bacteroidales;f__Paludibacteraceae;g__RF16;s__RF16 sp900321775	493.715	307.596	344.008	247.625	0	268.867	268.969	246.401	481.876	0	0	0	0	0	0	366.624	178.693	179.228
RGMC.22369	d__Bacteria;p__Planctomycetota;c__Planctomycetia;o__Pirellulales;f__Thermoguttaceae;g__RUG369;s__RUG369 sp902786505	125.208	0	0	0	0	0	0	0	0	0	0	0	0	0	0	0	0	0
RGMC.22371	d__Bacteria;p__Bacillota_A;c__Clostridia;o__Lachnospirales;f__Lachnospiraceae;g__G11;s__G11 sp900103495	849.184	653.162	543.423	713.369	652.992	658.695	608.891	695.779	770.581	266.464	235.142	256.385	308.469	309.224	314.333	796.129	464.836	468.074
RGMC.22405	d__Bacteria;p__Bacteroidota;c__Bacteroidia;o__Bacteroidales;f__Bacteroidaceae;g__UBA4372;s__UBA4372 sp902776455	0	0	0	0	0	0	0	0	120.932	0	0	0	0	0	0	0	0	0
RGMC.22407	d__Bacteria;p__Bacteroidota;c__Bacteroidia;o__Bacteroidales;f__Paludibacteraceae;g__RF16;s__RF16 sp902769535	327.304	187.882	185.666	140.589	0	157.189	136.66	184.502	333.729	0	0	0	0	0	0	281.396	0	0
RGMC.22408	d__Bacteria;p__Bacteroidota;c__Bacteroidia;o__Bacteroidales;f__Paludibacteraceae;g__RF16;s__RF16 sp900321775	492.953	312.111	356.834	248.981	0	274.935	253.614	220.655	485.949	0	0	0	0	0	0	361.922	178.458	177.61
RGMC.22428	d__Bacteria;p__Bacillota_C;c__Negativicutes;o__Selenomonadales;f__Selenomonadaceae;g__Anaerovibrio;s__Anaerovibrio lipolyticus	0	0	425.417	0	0	0	0	0	0	0	0	0	0	0	0	0	0	0
RGMC.22451	d__Archaea;p__Methanobacteriota;c__Methanobacteria;o__Methanobacteriales;f__Methanobacteriaceae;g__Methanobrevibacter_A;s__Methanobrevibacter_A sp017434525	827.791	1659.41	0	1823.34	1553.32	2118.3	1580.56	2312.77	778.82	891.616	1130.84	1007.04	1196.44	1482.66	1004.76	1034.01	2113.4	2078.59
RGMC.2247	d__Bacteria;p__Bacteroidota;c__Bacteroidia;o__Bacteroidales;f__Bacteroidaceae;g__UBA2918;s__UBA2918 sp946407325	3003.63	1718	2239.77	1422.03	954.19	1367.73	1655.33	1072.06	2533.43	1355.01	922.189	810.119	1076.62	913.158	1021.9	2398.05	1280.56	1291.88
RGMC.22478	d__Bacteria;p__Bacillota_A;c__Clostridia;o__Oscillospirales;f__Acutalibacteraceae;g__Ruminococcus_E;s__Ruminococcus_E sp902776375	0	1660.13	1915.48	1611.93	1423.53	1922.98	940.636	1545.57	0	0	815.404	922.668	698.67	623.811	814.969	0	1281.09	1277.19
RGMC.225	d__Bacteria;p__Bacillota_A;c__Clostridia;o__Lachnospirales;f__Lachnospiraceae;g__Acetatifactor;s__Acetatifactor sp016290775	776.991	559.296	291.963	858.562	715.204	673.906	772.552	662.149	747.676	840.07	490.799	586.076	515.511	523.099	548.983	901.415	741.855	723.681
RGMC.2271	d__Bacteria;p__Bacillota_A;c__Clostridia;o__Lachnospirales;f__Lachnospiraceae;g__Butyrivibrio;s__	0	0	1660.34	0	0	0	0	0	0	0	940.601	0	0	0	0	0	0	0
RGMC.2275	d__Bacteria;p__Bacillota_A;c__Clostridia;o__Peptostreptococcales;f__Anaerovoracaceae;g__Lentihominibacter;s__Lentihominibacter sp017431395	85.0716	129.577	104.257	105.654	0	129.927	102.919	191.997	0	0	105.99	0	0	0	0	94.4973	128.191	132.354
RGMC.228	d__Bacteria;p__Bacillota_A;c__Clostridia;o__Oscillospirales;f__Ruminococcaceae;g__Ruminococcus;s__Ruminococcus sp016290875	540.211	1255.35	1159.26	886.857	894.596	868.88	783.155	1042.82	840.677	590.244	862.939	897.703	702.328	729.742	667.447	735.213	667.319	669.367
RGMC.22822	d__Bacteria;p__Spirochaetota;c__Spirochaetia;o__Treponematales;f__Treponemataceae;g__Treponema_D;s__	322.224	207.536	182.974	190.293	214.514	194.605	260.321	277.772	271.737	264.937	273.005	307.916	529.356	494.631	462.145	324.599	322.329	318.073
RGMC.2285	d__Bacteria;p__Bacillota_A;c__Clostridia;o__Oscillospirales;f__Oscillospiraceae;g__Limivicinus;s__Limivicinus sp900319695	411.618	499.769	0	802.947	840.707	552.063	612.203	302.245	0	0	663.039	0	0	443.378	0	0	627.719	628.122
RGMC.22851	d__Bacteria;p__Bacteroidota;c__Bacteroidia;o__Bacteroidales;f__Paludibacteraceae;g__UBA1181;s__UBA1181 sp017551675	1486.86	987.221	803.241	1009.12	949.672	1116.3	1604.5	1450.08	1638.98	1831.47	771.198	840.058	1254.85	1686.81	1152.69	1703.59	1151.43	1158.1
RGMC.22901	d__Archaea;p__Thermoplasmatota;c__Thermoplasmata;o__Methanomassiliicoccales;f__Methanomethylophilaceae;g__JAKSHX01;s__	0	6274.27	0	0	0	0	9465.03	6168.23	9091.08	5110.7	0	0	7259.23	0	0	0	0	0
RGMC.2294	d__Bacteria;p__Spirochaetota;c__Spirochaetia;o__Treponematales;f__Treponemataceae;g__Treponema_D;s__	1706.12	1019.25	775.676	1320.98	1505.98	1134.64	1831.03	1126.67	2007.46	3178.95	1517.52	1667.07	2312.45	2582.93	2389.53	2030.79	1272.88	1278.91
RGMC.22982	d__Bacteria;p__Bacteroidota;c__Bacteroidia;o__Bacteroidales;f__Paludibacteraceae;g__UBA1181;s__UBA1181 sp002310215	929.846	538.717	424.24	592.217	520.094	530.828	737.726	554.267	761.451	2284.53	596.796	674.645	754.713	886.18	692.632	910.521	743.374	743.01
RGMC.22984	d__Bacteria;p__Bacteroidota;c__Bacteroidia;o__Bacteroidales;f__Paludibacteraceae;g__UBA1181;s__UBA1181 sp002310215	1066.49	608.021	465.07	697.087	597.207	611.291	833.644	632.007	880.584	2542.02	672.482	753.263	870.579	1030.49	804.442	1028.92	833.327	827.757
RGMC.23015	d__Bacteria;p__Bacillota_I;c__Bacilli_A;o__Acholeplasmatales;f__Anaeroplasmataceae;g__Anaeroplasma;s__	0	0	0	0	0	0	0	0	141.971	0	0	0	0	0	0	0	0	0
RGMC.23017	d__Bacteria;p__Spirochaetota;c__Spirochaetia;o__Treponematales;f__Treponemataceae;g__Treponema_D;s__	0	0	0	0	0	0	0	0	0	0	131.805	0	0	0	0	0	0	0
RGMC.23168	d__Bacteria;p__Bacteroidota;c__Bacteroidia;o__Bacteroidales;f__Bacteroidaceae;g__UBA1179;s__UBA1179 sp902779875	389.256	271.77	274.422	258.956	161.231	283.508	262.084	335.774	481.341	0	0	0	132.967	131.647	119.863	427.966	180.656	189.654
RGMC.23215	d__Bacteria;p__Spirochaetota;c__Spirochaetia;o__Treponematales;f__Treponemataceae;g__Treponema_D;s__	743.391	496.371	491.389	550.318	535.178	640.405	648.124	642.123	962.713	0	174.652	0	331.733	397.723	325.92	847.324	400.387	400.504
RGMC.23224	d__Bacteria;p__Bacteroidota;c__Bacteroidia;o__Bacteroidales;f__UBA932;g__Cryptobacteroides;s__	541.318	363.317	398.813	345.385	0	324.819	292.28	278.942	473.772	0	0	0	233.929	229.572	222.082	458.91	283.577	281.79
RGMC.23225	d__Bacteria;p__Elusimicrobiota;c__Elusimicrobia;o__Elusimicrobiales;f__UBA9959;g__CACZRG01;s__CACZRG01 sp024681855	0	0	0	0	0	0	0	0	0	2766.43	601.667	709.506	1105.81	904.894	651.738	0	0	0
RGMC.2329	d__Bacteria;p__Bacteroidota;c__Bacteroidia;o__Bacteroidales;f__Bacteroidaceae;g__UBA4372;s__UBA4372 sp902779315	336.631	187.276	169.81	197.649	0	168.509	179.266	175.467	292.826	0	0	0	154.253	0	157.464	294.899	162.087	155.415
RGMC.2337	d__Bacteria;p__Fibrobacterota;c__Fibrobacteria;o__Fibrobacterales;f__Fibrobacteraceae;g__Fibrobacter;s__Fibrobacter sp947166265	0	0	0	0	0	0	0	0	166.909	0	0	0	0	163.662	0	0	0	0
RGMC.23392	d__Bacteria;p__Bacteroidota;c__Bacteroidia;o__Bacteroidales;f__UBA932;g__Cryptobacteroides;s__	179.992	139.415	137.908	0	0	0	0	129.713	191.607	0	0	0	0	0	0	161.881	0	0
RGMC.2341	d__Bacteria;p__Bacillota_A;c__Clostridia;o__Lachnospirales;f__Lachnospiraceae;g__Moryella;s__	0	387.923	398.04	456.565	0	443.906	314.723	380.069	0	0	0	0	0	0	0	0	452.823	446.799
RGMC.2342	d__Bacteria;p__Bacillota_A;c__Clostridia;o__Lachnospirales;f__Lachnospiraceae;g__Porcincola;s__Porcincola sp902801515	0	981.521	1015	1399.65	1224.72	1396.26	1145.79	1817.1	618.266	1935.47	1471.89	1657.9	1239.72	1360.05	1340.51	825.205	1470.11	1453.46
RGMC.23444	d__Bacteria;p__Spirochaetota;c__Spirochaetia;o__CADAEX01;f__CADAEX01;g__CADAEX01;s__	0	0	0	0	0	0	0	0	0	334.584	252.27	308.606	403.576	405.065	376.735	0	0	0
RGMC.2347	d__Bacteria;p__Bacteroidota;c__Bacteroidia;o__Bacteroidales;f__Paludibacteraceae;g__UBA1723;s__UBA1723 sp002371265	930.182	624.384	486.917	701.906	688.911	779.528	857.77	876.536	1129.64	327.087	363.472	345.542	644.207	804.284	576.355	1125.15	580.151	578.754
RGMC.2349	d__Bacteria;p__Bacillota_A;c__Clostridia;o__Lachnospirales;f__Lachnospiraceae;g__Butyrivibrio;s__Butyrivibrio sp016291375	2776.99	2912.92	2025.14	2297.16	2610.71	2194.79	2875.12	2216.17	3059.84	2876.48	2160.04	2142.48	1909.6	2092.72	2535.52	3262.07	2668.75	2626.68
RGMC.23495	d__Bacteria;p__Verrucomicrobiota;c__Lentisphaeria;o__Victivallales;f__Victivallaceae;g__UBA1784;s__	0	0	0	0	0	0	0	0	0	258.058	0	0	145.694	0	103.795	0	0	0
RGMC.23524	d__Bacteria;p__Fibrobacterota;c__Fibrobacteria;o__Fibrobacterales;f__Fibrobacteraceae;g__Fibrobacter;s__Fibrobacter succinogenes_P	1681.74	1041.54	1033.89	779.268	774.543	696.671	951.122	801.599	1381.66	1313.54	652.106	766.043	948.893	1076.9	819.316	1406.08	910.061	895.615
RGMC.23587	d__Bacteria;p__Pseudomonadota;c__Alphaproteobacteria;o__UBA3830;f__UBA3830;g__CADBNZ01;s__	2369.42	928.674	585.5	1306.48	1160.49	1124.11	1193.72	633.129	1503.2	224.683	943.435	723.74	1044.64	642.979	995.399	1634.93	1137.71	1131.02
RGMC.2360	d__Bacteria;p__Bacillota_A;c__Clostridia;o__Lachnospirales;f__Lachnospiraceae;g__UBA1712;s__UBA1712 sp902789785	858.075	825.688	697.37	596.153	442.934	697.619	582.791	847.576	1022.91	154.921	152.612	134.063	145.508	151.561	154.124	640.112	344.635	333.262
RGMC.23640	d__Bacteria;p__Bacteroidota;c__Bacteroidia;o__Bacteroidales;f__F082;g__Limimorpha;s__Limimorpha sp902774295	552.564	227.014	0	477.104	305.663	517.146	582.167	696.962	909.628	0	0	0	0	0	0	689.923	308.631	309.672
RGMC.23642	d__Bacteria;p__Bacteroidota;c__Bacteroidia;o__Bacteroidales;f__Bacteroidaceae;g__Ga6A1;s__Ga6A1 sp900102385	0	0	0	0	0	0	234.72	0	0	0	0	0	0	0	0	0	0	0
RGMC.23647	d__Bacteria;p__Spirochaetota;c__Spirochaetia;o__Sphaerochaetales;f__Sphaerochaetaceae;g__UBA9732;s__	149.122	0	0	198.554	179.132	151.697	290.14	212.564	242.617	0	0	0	155.727	171.317	146.63	245.477	150.476	153.2
RGMC.23649	d__Bacteria;p__Bacillota_A;c__Clostridia;o__Christensenellales;f__Aristaeellaceae;g__UBA2862;s__UBA2862 sp017537105	0	276.285	283.612	0	0	296.372	0	256.759	0	765.401	633.637	699.576	437.108	446.137	477.43	0	346.336	339.975
RGMC.23679	d__Bacteria;p__Spirochaetota;c__Spirochaetia;o__Treponematales;f__Treponemataceae;g__Treponema_D;s__	0	0	0	0	0	0	0	0	0	0	105.377	0	0	0	0	0	0	0
RGMC.23698	d__Bacteria;p__Bacteroidota;c__Bacteroidia;o__Bacteroidales;f__F082;g__Limimorpha;s__Limimorpha sp902774295	672.628	275.531	0	561.472	345.243	624.417	693.285	878.895	1104.86	167.267	0	0	193.059	211.337	151.883	851.324	375.509	366.523
RGMC.23699	d__Bacteria;p__Bacteroidota;c__Bacteroidia;o__Bacteroidales;f__Bacteroidaceae;g__UBA4372;s__UBA4372 sp902779315	389.27	221.573	195.015	228.138	184.35	197.648	219.174	210.59	351.821	0	150.244	166.933	185.458	187.135	185.736	349.595	185.942	184.102
RGMC.23707	d__Bacteria;p__Bacteroidota;c__Bacteroidia;o__Bacteroidales;f__UBA932;g__Cryptobacteroides;s__	466.395	352.259	362.038	334.093	252.173	310.674	285.531	288.314	518.31	0	0	0	0	0	0	435.581	229.906	226.148
RGMC.23709	d__Bacteria;p__Bacteroidota;c__Bacteroidia;o__Bacteroidales;f__Bacteroidaceae;g__Prevotella;s__	0	0	0	0	0	0	0	0	249.801	0	0	0	0	0	0	0	0	0
RGMC.23711	d__Bacteria;p__Spirochaetota;c__Spirochaetia;o__Sphaerochaetales;f__Sphaerochaetaceae;g__UBA9732;s__	128.601	0	0	0	0	0	160.262	129.528	148.078	0	0	0	0	0	0	139.376	0	0
RGMC.23712	d__Bacteria;p__Spirochaetota;c__Spirochaetia;o__Treponematales;f__Treponemataceae;g__Treponema_D;s__Treponema_D sp000260795	0	0	0	0	0	0	0	0	0	0	196.426	0	0	0	0	0	0	0
RGMC.2372	d__Bacteria;p__Bacteroidota;c__Bacteroidia;o__Bacteroidales;f__Bacteroidaceae;g__UBA4372;s__UBA4372 sp017427185	120.501	0	0	0	0	0	0	0	0	0	0	0	0	0	0	131.453	0	0
RGMC.23735	d__Bacteria;p__Bacillota_A;c__Clostridia;o__Lachnospirales;f__Lachnospiraceae;g__G11;s__G11 sp947167445	655.683	472.879	364.477	552.659	478.238	482.981	450.192	484.946	557.32	0	0	0	0	0	0	617.918	345.629	339.751
RGMC.23772	d__Bacteria;p__Verrucomicrobiota;c__Kiritimatiellia;o__RFP12;f__UBA1067;g__RGIG6720;s__	343.298	172.751	204.663	210.512	213.914	148.086	410.186	250.546	232.876	288.317	235.943	279.373	399.693	469.036	216.592	631.891	341.847	336.815
RGMC.23777	d__Bacteria;p__Bacteroidota;c__Bacteroidia;o__Bacteroidales;f__UBA3824;g__UBA3824;s__UBA3824 sp017530465	238.341	128.405	0	0	0	126.771	0	0	295.652	0	0	0	0	0	0	0	0	0
RGMC.23786	d__Bacteria;p__Bacillota_C;c__Negativicutes;o__Acidaminococcales;f__Acidaminococcaceae;g__Succiniclasticum;s__	0	0	0	0	0	0	0	0	0	447.18	408.323	454.954	305.148	310.436	362.43	0	0	0
RGMC.23790	d__Bacteria;p__Bacteroidota;c__Bacteroidia;o__Bacteroidales;f__UBA932;g__Cryptobacteroides;s__	519.532	312.682	298.245	339.83	276.248	314.016	313.905	314.325	331.502	354.789	297.513	308.485	305.229	302.767	264.049	424.106	328.532	321.614
RGMC.23804	d__Bacteria;p__Bacteroidota;c__Bacteroidia;o__Bacteroidales;f__WCHB1-69;g__UBA1195;s__	0	0	0	0	0	0	0	0	0	456.414	328.868	354.215	385.584	407.105	362.024	0	0	0
RGMC.23807	d__Bacteria;p__Bacteroidota;c__Bacteroidia;o__Bacteroidales;f__ML635J-15;g__Bact-19;s__Bact-19 sp902791865	0	0	0	0	0	0	0	0	0	0	347.024	0	534.438	559.402	530.587	0	0	0
RGMC.23811	d__Bacteria;p__Synergistota;c__Synergistia;o__Synergistales;f__Synergistaceae;g__Synergistes;s__Synergistes sp016288355	0	0	0	0	0	0	0	0	0	313.844	154.693	0	0	0	0	0	0	0
RGMC.23819	d__Bacteria;p__Bacillota_A;c__Clostridia;o__Christensenellales;f__Aristaeellaceae;g__SFMI01;s__SFMI01 sp902781945	0	0	0	0	0	0	0	0	0	0	327.357	0	0	0	0	0	0	0
RGMC.2383	d__Bacteria;p__Bacillota_I;c__Bacilli_A;o__RFN20;f__CAG-826;g__UBA3207;s__	300.135	202.291	0	415.3	478.31	333.938	536.709	360.36	577.238	0	0	0	301.812	230.542	292.342	596.916	383.005	378.821
RGMC.23836	d__Bacteria;p__Bacillota_C;c__Negativicutes;o__Acidaminococcales;f__Acidaminococcaceae;g__Succiniclasticum;s__	414.586	243.209	235.392	289.399	297.876	246.929	267.209	221.466	0	461.978	337.079	400.951	331.919	310.917	320.872	0	302.279	296.059
RGMC.23869	d__Bacteria;p__Bacillota_A;c__Clostridia;o__Oscillospirales;f__Oscillospiraceae;g__Limivicinus;s__Limivicinus sp902778285	618.605	776.99	627.906	1001.28	804.049	760.347	562.496	463.39	400.647	985.689	1221.24	1318.37	717.513	594.938	1023.01	836.974	1169.28	1159.68
RGMC.2387	d__Bacteria;p__Bacillota_A;c__Clostridia;o__Peptostreptococcales;f__Anaerovoracaceae;g__RUG099;s__	0	0	0	683.848	475.189	668.44	512.123	588.037	0	0	503.155	483.203	621.392	662.712	529.186	0	901.922	893.132
RGMC.23875	d__Bacteria;p__Bacteroidota;c__Bacteroidia;o__Bacteroidales;f__UBA932;g__Cryptobacteroides;s__Cryptobacteroides sp017427385	1180.76	809.888	885.319	817.647	698.565	800.691	844.483	829.284	1062.54	492.271	501.581	476.598	609.511	687.956	570.269	1058.5	655.295	662.776
RGMC.23885	d__Bacteria;p__Bacillota_I;c__Bacilli_A;o__RFN20;f__CAG-826;g__UBA3207;s__	482.011	0	0	435.576	505.653	359.601	784.606	618.001	647.363	0	0	0	0	0	0	1112.01	599.361	576.873
RGMC.23894	d__Bacteria;p__Bacteroidota;c__Bacteroidia;o__Bacteroidales;f__F082;g__Limimorpha;s__Limimorpha sp902774295	931.91	315.215	0	604.313	412.796	683.732	1001.45	1153.6	1206.25	198.703	0	0	371.671	546.144	199.82	2077.15	627.372	620.451
RGMC.23902	d__Bacteria;p__Spirochaetota;c__Spirochaetia;o__Treponematales;f__Treponemataceae;g__Treponema_D;s__	4586.9	2544.24	2295.94	3906.55	3937.57	4333.97	6023.75	4563.67	5575.68	1194.66	1257.11	1681.16	2649.58	3092.06	2283.83	6709.18	3084.3	3072.29
RGMC.23922	d__Bacteria;p__Bacteroidota;c__Bacteroidia;o__Bacteroidales;f__UBA932;g__Cryptobacteroides;s__	416.913	0	269.201	0	0	0	0	0	0	446.021	357.423	364.752	306.698	294.582	312.401	0	276.584	279.462
RGMC.2395	d__Bacteria;p__Spirochaetota;c__Spirochaetia;o__Treponematales;f__Treponemataceae;g__Treponema_D;s__	1529.96	959.035	932.671	1043.77	894.903	1195.37	1093.35	1140.34	1984.4	307.685	265.33	306.133	507.667	600.644	521.491	1599.78	732.921	732.745
RGMC.23951	d__Bacteria;p__Bacteroidota;c__Bacteroidia;o__Bacteroidales;f__Bacteroidaceae;g__UBA1179;s__UBA1179 sp902782245	1258.44	838.199	1207.85	614.566	534.732	742.427	838.044	855.22	1511.73	552.967	310.872	346.679	524.265	634.332	473.665	930.083	476.463	472.849
RGMC.23964	d__Bacteria;p__Bacillota_A;c__Clostridia;o__Lachnospirales;f__Lachnospiraceae;g__Eubacterium_Q;s__Eubacterium_Q sp900321215	0	287.494	274.256	0	0	246.824	212.624	231.394	295.749	0	0	0	0	0	0	0	0	0
RGMC.23969	d__Bacteria;p__Bacteroidota;c__Bacteroidia;o__Bacteroidales;f__F082;g__Limimorpha;s__Limimorpha sp902774295	913.886	354.582	0	915.014	550.71	857.659	927.93	1005.33	1420.8	329.366	0	0	294.01	297.68	257.845	1241.59	585.739	584.572
RGMC.23973	d__Bacteria;p__Bacillota_A;c__Clostridia;o__Oscillospirales;f__Oscillospiraceae;g__Faecousia;s__	0	0	0	163.082	568.561	0	440.797	0	0	738.589	701.543	773.15	696.069	729.544	587.348	0	315.723	316.123
RGMC.2404	d__Bacteria;p__Bacteroidota;c__Bacteroidia;o__Bacteroidales;f__UBA932;g__Bact-11;s__Bact-11 sp002361615	0	0	0	0	0	224.081	268.935	237.36	0	359.444	244.733	241.402	241.696	265.474	231.127	0	253.743	250.123
RGMC.2405	d__Bacteria;p__Pseudomonadota;c__Gammaproteobacteria;o__Pseudomonadales;f__Pseudomonadaceae;g__Pseudomonas_E;s__Pseudomonas_E fluorescens_BV	0	0	0	0	0	0	0	75.385	0	0	0	0	0	215.744	0	0	0	0
RGMC.2410	d__Bacteria;p__Bacillota_I;c__Bacilli_A;o__RF39;f__UBA660;g__RGIG9169;s__	322.996	343.162	406.186	0	0	234.954	0	262.687	318.193	0	0	0	0	0	0	0	0	0
RGMC.2415	d__Bacteria;p__Bacteroidota;c__Bacteroidia;o__Bacteroidales;f__UBA932;g__Cryptobacteroides;s__Cryptobacteroides sp946406355	2146.58	1366.46	1506.61	999.54	623.501	1064.22	713.96	1124.91	1725.54	304.596	291.429	285.732	318.67	304.7	314.297	1266.33	599.392	606.838
RGMC.242	d__Archaea;p__Methanobacteriota;c__Methanobacteria;o__Methanobacteriales;f__Methanobacteriaceae;g__Methanobrevibacter;s__Methanobrevibacter sp016291275	163.704	419.308	0	864.691	803.553	1419.1	780.64	1616.44	408.707	859.402	752.651	744.14	679.533	822.88	716.052	427.211	602.455	611.342
RGMC.2432	d__Bacteria;p__Bacteroidota;c__Bacteroidia;o__Bacteroidales;f__UBA932;g__Cryptobacteroides;s__Cryptobacteroides sp900316245	112.34	0	114.107	0	0	0	0	0	109.56	0	0	0	0	0	0	0	0	0
RGMC.2438	d__Bacteria;p__Spirochaetota;c__Spirochaetia;o__Treponematales;f__Treponemataceae;g__Treponema_D;s__	913.535	590.043	613.083	639.794	600.382	773.866	762.983	789.117	1202.69	191.646	179.483	194.622	355.533	433.692	347.127	986.484	449.49	447.974
RGMC.24539	d__Bacteria;p__Bacteroidota;c__Bacteroidia;o__Bacteroidales;f__Paludibacteraceae;g__UBA1723;s__UBA1723 sp002371265	684.042	454.757	374.834	524.236	505.797	567.407	602.376	604.894	847.817	256.712	271.897	260.766	458.164	554.62	426.016	831.881	440.558	441.788
RGMC.24576	d__Bacteria;p__Bacteroidota;c__Bacteroidia;o__Bacteroidales;f__Paludibacteraceae;g__UBA1723;s__UBA1723 sp002371265	792.923	510.5	403.846	588.017	550.889	636.049	634.51	627.908	972.201	271.05	284.761	286.61	487.67	582.859	483.71	933.136	496.677	491.53
RGMC.246	d__Archaea;p__Halobacteriota;c__Methanomicrobia;o__Methanomicrobiales;f__Methanomicrobiaceae;g__Methanomicrobium;s__Methanomicrobium mobile	35079.7	9309.48	8083.31	4636.62	4786.39	3088.78	10571	16016.7	14298.7	7692.24	6226.04	7839.35	11315.5	13196.8	6466.71	24215.9	13176.1	12950.8
RGMC.247	d__Bacteria;p__Bacillota_A;c__Clostridia;o__Lachnospirales;f__Lachnospiraceae;g__Butyrivibrio;s__Butyrivibrio sp016291375	2636	2876.16	1893.1	2224.19	2411.73	1993.93	1937.91	1431.21	2979.64	2542.66	1835.35	2008.57	1402.41	1159.61	2289.46	3084.38	2751.75	2706.89
RGMC.248	d__Bacteria;p__Bacteroidota;c__Bacteroidia;o__Bacteroidales;f__UBA3663;g__UBA3663;s__UBA3663 sp902776605	1809.62	1320.77	1467.62	1049.77	779.348	1367.92	1148.65	1270.97	2231.01	354.792	292.806	343.93	584.222	571.352	492.621	1738.3	805.901	815.741
RGMC.2481	d__Bacteria;p__Bacillota_A;c__Clostridia;o__Saccharofermentanales;f__Saccharofermentanaceae;g__Saccharofermentans;s__Saccharofermentans sp016292215	382.377	402.038	182.481	743.629	1006.12	568.812	796.659	456.799	384.341	2424.14	1485.69	1509.95	1106.32	1148.65	1250.68	612.526	858.192	849.157
RGMC.2482	d__Bacteria;p__Bacteroidota;c__Bacteroidia;o__Bacteroidales;f__UBA932;g__Bact-11;s__Bact-11 sp002361615	0	0	0	0	0	0	177.954	175.072	0	238.801	185.324	0	183.623	206.636	162.992	0	164.549	160.822
RGMC.2514	d__Bacteria;p__Bacillota_I;c__Bacilli_A;o__RF39;f__UBA660;g__RGIG9169;s__	173.916	171.866	179.937	0	0	0	0	0	163.312	0	0	0	0	0	0	0	0	0
RGMC.25474	d__Bacteria;p__Bacteroidota;c__Bacteroidia;o__Bacteroidales;f__F082;g__Limimorpha;s__	0	0	0	347.97	585.52	221.631	541.452	0	0	1008.86	853.308	918.974	965.401	1014.57	839.332	421.667	442.413	434.255
RGMC.25491	d__Bacteria;p__Bacillota_I;c__Bacilli_A;o__RFN20;f__CAG-826;g__UBA2450;s__	264.412	0	0	288.649	276.012	224.567	336.55	203.16	323.893	0	0	0	276.309	277.219	286.769	443.729	244.091	239.036
RGMC.2553	d__Bacteria;p__Bacillota_A;c__Clostridia;o__Lachnospirales;f__Lachnospiraceae;g__CAG-791;s__CAG-791 sp030525515	0	0	597.006	0	0	0	0	0	0	0	0	0	0	0	0	0	0	0
RGMC.25535	d__Bacteria;p__Bacillota_I;c__Bacilli_A;o__RFN20;f__CAG-826;g__RUG14515;s__	617.683	283.149	0	538.308	637.337	459.565	818.574	495.985	768.03	747.559	478.977	524.436	735.104	799.217	691.963	831.06	565.346	553.566
RGMC.25537	d__Bacteria;p__Bacteroidota;c__Bacteroidia;o__Bacteroidales;f__UBA932;g__Cryptobacteroides;s__	288.44	250.166	249.692	232.958	0	236.878	224.911	216.604	308.289	0	0	0	0	0	0	355.395	0	187.757
RGMC.25540	d__Bacteria;p__Bacteroidota;c__Bacteroidia;o__Bacteroidales;f__F082;g__Limimorpha;s__Limimorpha sp001603665	0	0	0	0	165.051	0	162.286	0	0	514.6	338.187	322.158	481.165	639.083	415.021	0	0	0
RGMC.25544	d__Bacteria;p__Bacteroidota;c__Bacteroidia;o__Bacteroidales;f__F082;g__Limimorpha;s__	1053.4	302.472	0	1789.23	3269.52	1200.11	2825.85	934.715	1106.52	5715.57	4896.02	5430.32	5475.41	5653.96	4945.97	2303.31	2312.51	2296.28
RGMC.25592	d__Bacteria;p__Bacillota_A;c__Clostridia;o__Christensenellales;f__CAG-917;g__RGIG8124;s__	0	0	0	0	0	0	173.967	0	189.207	0	0	0	0	0	139.393	193.351	0	0
RGMC.25616	d__Bacteria;p__Bacillota_I;c__Bacilli_A;o__RFN20;f__CAG-826;g__UBA3207;s__	258.234	200.74	153.421	356.906	463.695	332.101	599.504	422.888	572.452	0	111.238	0	219.925	197.765	203.193	589.301	293.704	307.055
RGMC.2562	d__Bacteria;p__Bacillota_A;c__Clostridia;o__Oscillospirales;f__Ruminococcaceae;g__HUN007;s__HUN007 sp902789705	549.478	612.168	545.271	535.775	689.794	505.661	661.43	469.768	514.964	476.614	410.038	554.213	414.79	421.835	458.436	564.276	430.632	418.705
RGMC.25632	d__Bacteria;p__Bacteroidota;c__Bacteroidia;o__Bacteroidales;f__UBA932;g__Cryptobacteroides;s__	408.159	287.922	342.253	0	0	258.269	0	226.618	397.018	0	0	0	0	0	0	0	0	0
RGMC.25745	d__Bacteria;p__Bacteroidota;c__Bacteroidia;o__Bacteroidales;f__Bacteroidaceae;g__UBA1179;s__	3646.28	2335.65	2308.29	2147.07	1772.61	2315.43	2554.43	2402.72	4282.49	924.993	939.113	1109.35	1695.61	1765.35	1660.79	3411.64	1702.63	1691.42
RGMC.2577	d__Bacteria;p__Bacteroidota;c__Bacteroidia;o__Bacteroidales;f__UBA932;g__Cryptobacteroides;s__	1936.55	1518.56	1756.42	1437.6	1304.02	1392.52	1044.24	1214.5	1212.21	1561.64	1302.4	1369.35	1125.48	1058.65	1111.32	1383.88	1278.64	1254.48
RGMC.25779	d__Bacteria;p__Bacteroidota;c__Bacteroidia;o__Bacteroidales;f__F082;g__Limimorpha;s__Limimorpha sp902789915	0	0	0	0	0	0	0	0	0	0	0	0	0	0	0	183.04	0	0
RGMC.25806	d__Bacteria;p__Eremiobacterota;c__CADAWZ01;o__CADAWZ01;f__CADAWZ01;g__JAKSUM01;s__	0	0	0	136.044	370.409	0	222.456	0	0	1607.53	1571.78	1522.22	1271.56	1482.38	1062.49	0	214.141	210.347
RGMC.25807	d__Bacteria;p__Bacillota_A;c__Clostridia;o__Oscillospirales;f__Oscillospiraceae;g__Faecousia;s__	0	0	0	988.947	2290.52	278.143	1960.37	147.882	0	1244.82	1769.49	1865.95	2177.92	2155.31	1588.81	369.115	1761.09	1727.58
RGMC.25846	d__Bacteria;p__Bacteroidota;c__Bacteroidia;o__Bacteroidales;f__Bacteroidaceae;g__UBA4372;s__UBA4372 sp902779315	446.961	246.026	221.579	250.648	196.56	215.895	236.207	231.356	385.04	0	166.918	181.198	198.23	193.078	197.629	389.324	204.627	203.322
RGMC.2587	d__Bacteria;p__Bacillota_C;c__Negativicutes;o__Acidaminococcales;f__Acidaminococcaceae;g__Succiniclasticum;s__Succiniclasticum sp017443005	0	0	147.053	0	0	0	0	0	0	0	0	0	0	0	0	0	0	0
RGMC.25893	d__Bacteria;p__Fibrobacterota;c__Fibrobacteria;o__Fibrobacterales;f__Fibrobacteraceae;g__Fibrobacter;s__Fibrobacter sp002210345	1211.59	739.18	670.847	615.808	570.894	844.453	695.601	851.735	1391.97	0	128.284	0	181.968	188.112	161.508	930.591	347.25	351.689
RGMC.25894	d__Bacteria;p__Bacillota_A;c__Clostridia;o__Lachnospirales;f__Lachnospiraceae;g__CAG-411;s__CAG-411 sp902795895	0	0	0	0	0	0	0	0	0	0	322.813	0	0	0	0	0	0	0
RGMC.25897	d__Bacteria;p__Bacteroidota;c__Bacteroidia;o__Bacteroidales;f__Bacteroidaceae;g__Prevotella;s__Prevotella sp016286585	3797.04	2438.16	2537.42	1530.31	1241.49	1711.89	1357.15	1448.02	2953.68	753.824	922.341	816.43	940.029	753.74	946.021	2675.78	1128.43	1118.82
RGMC.26	d__Bacteria;p__Desulfobacterota;c__Desulfovibrionia;o__Desulfovibrionales;f__Desulfovibrionaceae;g__Desulfovibrio;s__Desulfovibrio sp016284885	425.428	335.526	0	585.173	750.403	566.862	872.92	721.878	360.839	869.831	1101.72	980.833	1005.99	1231.39	797.909	658.903	669.925	663.894
RGMC.2606	d__Bacteria;p__Bacillota_A;c__Clostridia;o__Lachnospirales;f__Lachnospiraceae;g__ISDg;s__ISDg sp902797475	0	0	0	0	280.892	0	216.616	0	0	1127.33	728.653	754.806	640.644	692.815	626.374	0	189.365	185.239
RGMC.2618	d__Bacteria;p__Bacteroidota;c__Bacteroidia;o__Bacteroidales;f__UBA932;g__Bact-11;s__Bact-11 sp002361615	0	0	0	0	222.487	234.7	262.977	242.709	0	429.014	282.959	279.926	279.877	306.344	258.688	0	269.057	268.825
RGMC.26337	d__Archaea;p__Methanobacteriota;c__Methanobacteria;o__Methanobacteriales;f__Methanobacteriaceae;g__Methanobrevibacter_A;s__	0	0	0	1214.64	3554.49	0	2374.23	0	0	5555.63	5730.23	5290.89	6242.74	7600.96	5632.81	0	2298.56	2279.17
RGMC.26354	d__Bacteria;p__Bacteroidota;c__Bacteroidia;o__Bacteroidales;f__Paludibacteraceae;g__UBA1723;s__UBA1723 sp002371265	614.623	414.505	327.529	469.959	452.969	512.081	559.562	555.072	747.769	220.56	241.868	226.972	430.746	529.735	378.847	741.45	384.796	386.668
RGMC.26479	d__Bacteria;p__Bacteroidota;c__Bacteroidia;o__Bacteroidales;f__Paludibacteraceae;g__UBA1723;s__UBA1723 sp002371265	603.868	398.995	309.186	452.367	433.832	493.017	539.431	567.314	703.675	204.292	231.869	215.006	412.502	516.172	362.565	729.886	371.699	366.429
RGMC.2651	d__Bacteria;p__Bacillota_A;c__Clostridia;o__Lachnospirales;f__Lachnospiraceae;g__ISDg;s__ISDg sp902797475	0	0	0	395.653	757.551	232.558	654.316	211.579	0	2902.94	1681.58	1793.77	1721.85	1797.69	1682.98	0	489.527	497.057
RGMC.266	d__Bacteria;p__Bacillota_A;c__Clostridia;o__Oscillospirales;f__CAG-272;g__CAG-390;s__CAG-390 sp902783905	0	0	0	0	0	0	0	0	0	157.961	0	0	0	0	0	0	0	0
RGMC.26765	d__Bacteria;p__Bacillota_A;c__Clostridia;o__Oscillospirales;f__Acutalibacteraceae;g__Ruminococcus_E;s__Ruminococcus_E sp902776375	0	20783.6	18880.7	21678.3	20999	24082.2	10752.5	13577.7	0	0	8763.8	11923.7	7979.64	0	10178.5	0	20170.5	20006.2
RGMC.26898	d__Bacteria;p__Bacillota_A;c__Clostridia;o__Oscillospirales;f__Oscillospiraceae;g__Faecousia;s__	0	0	0	234.554	280.04	250.157	211.681	211.181	0	780.44	595.585	553.895	455.224	443.613	407.752	0	297.904	300.181
RGMC.26905	d__Bacteria;p__Bacillota_A;c__Clostridia;o__Saccharofermentanales;f__Saccharofermentanaceae;g__Saccharofermentans;s__	4006.41	4212.61	2121.53	4951.99	4270.97	4507.06	3934.79	4637.18	5069.92	2580.39	3596.16	4065.79	2852.55	3114.84	3586.06	4169.04	3479.55	3472.27
RGMC.26906	d__Bacteria;p__Bacillota_A;c__Clostridia;o__Lachnospirales;f__Lachnospiraceae;g__UBA1267;s__	0	482.685	562.643	421.562	366.801	488.733	340.163	482.754	0	819.072	555.436	601.267	451.211	452.767	460.874	0	521.919	513.14
RGMC.26917	d__Bacteria;p__Bacillota_A;c__Clostridia;o__Lachnospirales;f__Lachnospiraceae;g__UBA3774;s__	0	0	0	180.582	224.009	185.454	203.882	186.792	0	205.48	289.956	282.755	276.585	258.712	244.759	0	240.001	237.331
RGMC.26919	d__Bacteria;p__Actinomycetota;c__Coriobacteriia;o__Coriobacteriales;f__CADBOM01;g__CADBOM01;s__	0	237.599	260.135	293.195	251.823	394.116	0	420.519	126.841	0	356.639	412.325	300.84	0	313.302	0	243.071	235.262
RGMC.26921	d__Bacteria;p__Bacillota_A;c__Clostridia;o__Oscillospirales;f__Oscillospiraceae;g__Limivicinus;s__	138.688	275.436	203.466	391.435	382.541	351.733	275.188	306.81	139.809	421.359	451.514	446.782	309.868	331.721	338.546	211.046	322.3	325.257
RGMC.26932	d__Bacteria;p__Bacteroidota;c__Bacteroidia;o__Bacteroidales;f__ML635J-15;g__Bact-19;s__	0	0	0	0	0	0	0	0	0	0	355.255	405.029	574.632	615.331	550.945	0	0	0
RGMC.26933	d__Bacteria;p__Bacillota_A;c__Clostridia;o__Oscillospirales;f__Oscillospiraceae;g__UBA738;s__	0	758.122	775.377	788.679	574.243	765.988	452.727	666.739	0	0	0	0	0	0	0	0	559.015	541.806
RGMC.26937	d__Bacteria;p__Bacillota_A;c__Clostridia;o__Lachnospirales;f__Lachnospiraceae;g__UBA1267;s__	0	0	0	0	0	0	0	523.599	0	933.833	634.452	703.967	511.21	501.533	555.912	0	613.789	613.892
RGMC.26963	d__Bacteria;p__UBP6;c__UBA1177;o__UBA1177;f__UBA1177;g__UBA1177;s__	0	0	0	0	0	0	0	0	0	662.288	0	0	576.581	595.272	388.817	0	0	0
RGMC.26966	d__Bacteria;p__Bacillota_A;c__Clostridia;o__Saccharofermentanales;f__Saccharofermentanaceae;g__Saccharofermentans;s__Saccharofermentans sp016292135	0	0	0	173.533	215.675	142.418	192.557	131.216	0	437.948	281.039	306.558	255.304	261.182	264.119	136.252	184.204	186.492
RGMC.2697	d__Bacteria;p__Fibrobacterota;c__Fibrobacteria;o__Fibrobacterales;f__Fibrobacteraceae;g__Fibrobacter;s__Fibrobacter sp017520105	1039.31	653.453	691.14	534.654	477.894	633.789	504.462	666.744	1088.67	298.974	230.889	234.539	378.515	407.953	335.25	927.754	403.739	402.597
RGMC.26974	d__Bacteria;p__Verrucomicrobiota;c__Lentisphaeria;o__Oligosphaerales;f__Oligosphaeraceae;g__UBA1407;s__	0	0	0	0	0	0	0	0	0	254.897	0	0	266.94	167.051	167.931	0	0	0
RGMC.26996	d__Bacteria;p__Bacillota_A;c__Clostridia;o__Christensenellales;f__Christensenellaceae;g__QANA01;s__QANA01 sp017439085	417.804	294.205	0	292.281	314.507	296.314	392.67	377.691	367.261	0	313.704	338.521	360.148	345.576	321.395	361.615	326.641	323.377
RGMC.27011	d__Bacteria;p__Bacteroidota;c__Bacteroidia;o__Bacteroidales;f__WCHB1-69;g__UBA1195;s__	0	0	0	0	0	0	0	0	0	322.992	229.929	244.837	249.791	269.099	244.703	0	0	0
RGMC.27013	d__Bacteria;p__Bacillota_A;c__Clostridia;o__Oscillospirales;f__Acutalibacteraceae;g__CAG-177;s__	0	0	0	0	125.739	0	0	0	0	392.457	369.507	368.842	333.435	330.987	277.956	0	116.775	121.865
RGMC.27020	d__Bacteria;p__Bacteroidota;c__Bacteroidia;o__Bacteroidales;f__F082;g__Limimorpha;s__	1497.52	503.786	0	2536.38	3296.29	1644.88	4136.13	1633.42	1811.54	5957.02	5317.34	5469.79	6235.17	7241.49	5624.5	3601.77	3303.93	3281.39
RGMC.27036	d__Bacteria;p__UBP6;c__UBA1177;o__UBA1177;f__UBA1177;g__UBA1177;s__UBA1177 sp002309575	0	0	0	0	0	0	0	0	0	599.731	0	0	551.6	606.158	348.979	0	0	0
RGMC.27037	d__Bacteria;p__Planctomycetota;c__Planctomycetia;o__Pirellulales;f__Thermoguttaceae;g__RUG695;s__RUG695 sp902766935	0	0	0	0	0	0	0	0	0	377.297	201.672	0	199.124	183.309	172.271	0	0	0
RGMC.27041	d__Bacteria;p__Bacillota_A;c__Clostridia;o__Christensenellales;f__Aristaeellaceae;g__RUG563;s__	1318.23	960.368	775.727	1347.16	1861.2	1120.01	1478.33	1016.14	1288.83	2830.88	2450.46	2744.78	2124.15	1916.53	2372.39	1410.03	1383.29	1339.11
RGMC.27063	d__Bacteria;p__Bacteroidota;c__Bacteroidia;o__Bacteroidales;f__Muribaculaceae;g__Sodaliphilus;s__Sodaliphilus sp902793405	990.361	610.733	463.324	608.494	413.063	557.955	426.249	515.11	702.791	503.975	395.621	414.711	353.945	330.705	364.634	755.667	535.376	530.536
RGMC.27085	d__Bacteria;p__Bacteroidota;c__Bacteroidia;o__Bacteroidales;f__UBA932;g__Cryptobacteroides;s__	261.77	156.068	204.443	151.188	0	159.222	0	172.917	168.031	0	0	0	0	0	0	202.932	0	0
RGMC.27098	d__Bacteria;p__Bacteroidota;c__Bacteroidia;o__Bacteroidales;f__P3;g__UBA1711;s__UBA1711 sp905234695	0	0	0	0	0	0	0	0	0	0	187.063	211.45	306.431	285.138	311.453	0	0	0
RGMC.27162	d__Bacteria;p__Synergistota;c__Synergistia;o__Synergistales;f__Synergistaceae;g__Synergistes;s__	0	0	0	0	795.432	0	227.224	0	0	6973.69	2996.28	3062.61	3333.05	3575.64	2559.79	0	90.2448	92.1363
RGMC.27181	d__Bacteria;p__Bacteroidota;c__Bacteroidia;o__Bacteroidales;f__ML635J-15;g__Bact-19;s__	0	0	0	0	0	0	0	0	0	0	0	0	591.398	607.804	588.027	0	0	0
RGMC.27186	d__Bacteria;p__Bacteroidota;c__Bacteroidia;o__Bacteroidales;f__P3;g__UBA1217;s__UBA1217 sp946401725	0	0	0	0	832.947	0	696.089	0	0	0	0	0	470.779	0	455.089	0	0	0
RGMC.27190	d__Bacteria;p__Bacillota_I;c__Bacilli_A;o__RF39;f__UBA660;g__RUG12783;s__	8347.41	5720.17	2810.5	0	0	5983.53	0	4641.1	11861.9	0	0	0	0	0	0	0	0	0
RGMC.27195	d__Bacteria;p__Bacillota_A;c__Clostridia;o__Peptostreptococcales;f__Anaerovoracaceae;g__RGIG5755;s__	398.423	1193.03	1673.34	1039.44	1204.13	1445.61	1162.34	2066.9	439.517	1511.45	1838.79	1816.91	2040.77	2365.2	1589.32	700.898	1410.6	1419.98
RGMC.27200	d__Bacteria;p__Bacillota_A;c__Clostridia;o__Oscillospirales;f__Oscillospiraceae;g__RGIG7114;s__	0	0	238.447	0	0	0	0	189.729	0	0	0	0	0	0	0	0	0	0
RGMC.27205	d__Bacteria;p__Bacillota_A;c__Clostridia;o__Oscillospirales;f__Acutalibacteraceae;g__UBA6857;s__	0	0	0	0	0	122.256	0	163.598	0	277.242	158.204	179.245	151.672	172.794	120.633	0	124.835	127.763
RGMC.27218	d__Bacteria;p__Bacteroidota;c__Bacteroidia;o__Bacteroidales;f__WCHB1-69;g__UBA1195;s__	0	0	0	0	0	0	0	0	0	400.523	295.346	319.477	330.405	343.175	324.918	0	0	0
RGMC.27267	d__Bacteria;p__Verrucomicrobiota;c__Kiritimatiellia;o__LD1-PB3_B;f__Lenti-01;g__CACXEY01;s__	0	0	130.555	0	0	0	0	0	162.641	0	0	0	0	0	0	0	0	0
RGMC.27271	d__Bacteria;p__Bacillota_A;c__Clostridia;o__Christensenellales;f__Christensenellaceae;g__QANA01;s__QANA01 sp017439085	473.698	330.002	120.566	321.937	343.175	315.904	419.198	417.892	412.173	268.721	292.81	327.742	335.641	332.596	317.848	389.316	344.218	342.609
RGMC.27272	d__Bacteria;p__Bacillota_A;c__Clostridia;o__Oscillospirales;f__Oscillospiraceae;g__UBA1774;s__	277.881	224.16	134.111	444.957	443.487	326.715	406.74	338.312	223.951	361.152	393.687	396.816	367.951	394.796	321.585	358.959	369.032	378.562
RGMC.27295	d__Bacteria;p__Bacillota_A;c__Clostridia;o__Oscillospirales;f__Acutalibacteraceae;g__RUG806;s__	142.358	350.306	485.064	284.748	272.269	322.807	241.991	392.644	0	1195.08	542.715	571.334	450.365	531.18	388.87	200.15	361.535	369.301
RGMC.27333	d__Bacteria;p__Bacteroidota;c__Bacteroidia;o__Bacteroidales;f__BM520;g__RGIG7150;s__RGIG7150 sp016285515	0	0	0	0	0	0	0	0	0	252.058	0	0	0	257.024	0	0	0	0
RGMC.27339	d__Bacteria;p__Bacteroidota;c__Bacteroidia;o__Bacteroidales;f__BM520;g__RGIG7150;s__RGIG7150 sp016285515	0	0	0	0	0	0	240.977	0	0	300.214	0	0	230.56	291.976	188.113	0	0	0
RGMC.27347	d__Bacteria;p__Bacillota_A;c__Clostridia;o__Christensenellales;f__Aristaeellaceae;g__UBA2862;s__	0	0	0	0	0	0	0	0	0	0	408.795	0	0	0	0	0	0	0
RGMC.27356	d__Bacteria;p__Bacillota_A;c__Clostridia;o__Peptostreptococcales;f__Anaerovoracaceae;g__Eubacterium_T;s__	0	0	0	0	0	0	0	154.808	0	332.505	346.781	384.986	303.061	297.302	305.047	0	0	0
RGMC.27363	d__Bacteria;p__Bacillota_A;c__Clostridia;o__Christensenellales;f__Christensenellaceae;g__QANA01;s__QANA01 sp017439085	438.855	302.836	111.024	293.293	300.042	288.182	385.239	372.068	376.783	240.28	264.949	297.82	307.428	300.767	285.275	362.743	310.482	306.641
RGMC.27390	d__Bacteria;p__Spirochaetota;c__Spirochaetia;o__Sphaerochaetales;f__Sphaerochaetaceae;g__UBA9732;s__	0	0	0	0	0	0	135.823	0	0	0	0	0	0	0	0	0	0	0
RGMC.27398	d__Bacteria;p__Bacteroidota;c__Kapaibacteriia;o__Kapaibacteriales;f__UBA2268;g__JAAYTD01;s__JAAYTD01 sp017428585	643.525	393.513	136.589	366.78	231.733	507.921	562.715	642.334	699.244	0	0	0	0	0	0	696.084	324.015	325.437
RGMC.27406	d__Bacteria;p__Bacteroidota;c__Bacteroidia;o__Bacteroidales;f__Bacteroidaceae;g__Prevotella;s__	0	0	0	0	0	0	0	0	226.508	0	0	0	0	0	0	0	0	0
RGMC.27411	d__Bacteria;p__Bacteroidota;c__Bacteroidia;o__Bacteroidales;f__Muribaculaceae;g__Sodaliphilus;s__	408.377	267.975	217.465	0	0	0	0	0	0	0	0	0	0	0	0	0	0	0
RGMC.27420	d__Bacteria;p__Verrucomicrobiota;c__Lentisphaeria;o__Victivallales;f__UBA1829;g__UBA1732;s__UBA1732 sp017540385	0	0	0	0	177.637	0	222.874	0	177.687	352.624	0	0	335.026	295.335	224.195	201.745	0	0
RGMC.27452	d__Archaea;p__Methanobacteriota;c__Methanobacteria;o__Methanobacteriales;f__Methanobacteriaceae;g__Methanobrevibacter;s__	2033.07	4666.54	0	8677.24	6443.01	14791	6788.38	17055.4	3987.16	4245.79	4314.7	4432.22	3943.18	4671.36	4031.35	5467.91	6438.99	6353.38
RGMC.27478	d__Bacteria;p__Bacillota_A;c__Clostridia;o__Christensenellales;f__CAG-138;g__RUG472;s__	182.372	260.487	0	562.521	925.903	391.167	724.176	353.76	197.203	735.288	1141.33	1097.05	1014.72	1115.82	983.652	285.477	671.4	664.775
RGMC.27492	d__Bacteria;p__Bacillota_A;c__Clostridia;o__Oscillospirales;f__Ruminococcaceae;g__Ruminococcus;s__	0	0	0	0	354.801	0	257.756	0	0	2073.76	1269.73	1131.94	904.068	1072.59	906.324	0	236.874	233.206
RGMC.27510	d__Bacteria;p__Bacillota_A;c__Clostridia;o__Oscillospirales;f__Oscillospiraceae;g__UBA1774;s__	0	0	0	0	0	0	0	0	0	0	0	0	0	0	178.323	0	0	0
RGMC.27526	d__Bacteria;p__Bacteroidota;c__Bacteroidia;o__Bacteroidales;f__Paludibacteraceae;g__RF16;s__RF16 sp902771935	1179.3	688.276	568.364	721.636	604.406	739.797	870.702	830.748	1547.59	0	207.491	255.586	382.284	319.172	380.702	1106.3	542.249	533.384
RGMC.27529	d__Bacteria;p__Bacillota_A;c__Clostridia;o__Oscillospirales;f__Ruminococcaceae;g__HUN007;s__	0	509.324	0	0	0	0	0	0	0	0	0	0	0	0	0	0	0	0
RGMC.27535	d__Bacteria;p__Verrucomicrobiota;c__Kiritimatiellia;o__RFP12;f__UBA3636;g__UBA3636;s__	198.494	0	0	0	0	0	0	0	190.551	0	0	0	0	0	0	0	0	0
RGMC.27547	d__Bacteria;p__Bacteroidota;c__Bacteroidia;o__Bacteroidales;f__Bacteroidaceae;g__UBA4372;s__	482.698	318.641	308.739	291.27	221.233	290.808	284.121	299.83	519.423	0	0	0	0	0	0	389.748	0	0
RGMC.27596	d__Bacteria;p__Bacteroidota;c__Bacteroidia;o__Bacteroidales;f__Bacteroidaceae;g__Prevotella;s__	386.635	0	0	0	0	388.166	393.463	0	492.381	0	0	0	0	0	0	662.438	398.738	397.861
RGMC.27613	d__Bacteria;p__Bacteroidota;c__Bacteroidia;o__Bacteroidales;f__WCHB1-69;g__UBA1195;s__	0	0	0	0	0	0	0	0	0	364.335	270.505	288.757	306.625	314.352	289.261	0	0	0
RGMC.27701	d__Bacteria;p__Spirochaetota;c__Spirochaetia;o__CADAEX01;f__CADAEX01;g__CADAEX01;s__CADAEX01 sp902787125	0	0	0	0	0	0	221.774	0	0	0	0	0	0	0	0	0	0	0
RGMC.27726	d__Bacteria;p__Bacillota_A;c__Clostridia;o__Lachnospirales;f__Lachnospiraceae;g__RUG11977;s__RUG11977 sp017427415	0	0	0	0	0	0	0	0	0	632.592	350.173	436.253	545.214	510.425	552.806	0	0	0
RGMC.27737	d__Bacteria;p__Spirochaetota;c__Spirochaetia;o__Treponematales;f__Treponemataceae;g__UBA1240;s__UBA1240 sp001603145	0	0	0	0	0	191.516	0	0	0	199.484	0	0	0	0	161.892	254.557	0	0
RGMC.2775	d__Bacteria;p__Bacillota_A;c__Clostridia;o__Saccharofermentanales;f__Saccharofermentanaceae;g__Firm-16;s__Firm-16 sp016281535	0	255.77	197.674	266.411	321.643	256.195	234.285	240.404	0	453.647	391.194	407.775	262.032	303.72	296.277	166.39	275.961	274.21
RGMC.27794	d__Bacteria;p__Bacillota_A;c__Clostridia;o__Peptostreptococcales;f__Anaerovoracaceae;g__RUG14258;s__RUG14258 sp017515705	0	130.138	115.833	0	0	142.165	0	191.721	0	0	0	0	0	0	0	0	163.785	162.309
RGMC.27803	d__Bacteria;p__Bacillota_A;c__Clostridia;o__Christensenellales;f__DTU072;g__CAG-1782;s__CAG-1782 sp946621465	0	0	0	0	0	0	0	0	124.052	0	0	0	0	0	0	107.74	0	0
RGMC.27804	d__Bacteria;p__Spirochaetota;c__Spirochaetia;o__Treponematales;f__Treponemataceae;g__Treponema_D;s__Treponema_D sp002392405	481.623	382.689	311.061	442.811	455.984	437.304	459.504	398.227	749.679	176.866	171.15	0	284.216	349.427	261.241	640.646	290.809	293.387
RGMC.27852	d__Bacteria;p__Bacteroidota;c__Bacteroidia;o__Bacteroidales;f__Paludibacteraceae;g__UBA1723;s__UBA1723 sp002392915	0	0	0	0	0	0	0	0	410.228	0	0	0	0	0	0	427.787	0	0
RGMC.27877	d__Bacteria;p__Bacillota_A;c__Clostridia;o__Lachnospirales;f__Lachnospiraceae;g__CAG-791;s__CAG-791 sp946629175	780.271	1984.61	1580.04	3007.73	4919.65	4364.72	1819.2	4311.79	1361.15	2803.18	3267.88	6874.85	7549.04	8712.38	7787.93	1143.75	4898.87	4864.77
RGMC.27881	d__Bacteria;p__Spirochaetota;c__Spirochaetia;o__Treponematales;f__Treponemataceae;g__UBA1240;s__UBA1240 sp001603145	156.447	0	0	0	0	157.004	158.106	0	150.157	202.627	0	0	149.251	172.931	132.85	256.287	0	146.367
RGMC.27884	d__Bacteria;p__Spirochaetota;c__Spirochaetia;o__Treponematales;f__Treponemataceae;g__Treponema_D;s__Treponema_D sp004554075	2434.48	1628.67	1612.88	1634.52	1389.97	1937.08	1575.11	1915.19	3064.49	436.689	405.201	386.442	750.868	1096.8	745.65	2544.01	1105.63	1096.12
RGMC.27912	d__Bacteria;p__Spirochaetota;c__Spirochaetia;o__CADAEX01;f__CADAEX01;g__CADAEX01;s__CADAEX01 sp902787125	0	0	0	0	0	0	253.473	0	0	0	0	0	0	0	0	0	0	0
RGMC.27920	d__Bacteria;p__Bacillota_A;c__Clostridia;o__Lachnospirales;f__Lachnospiraceae;g__CAMNLO01;s__CAMNLO01 sp946621895	0	608.674	767.281	0	0	0	0	333.884	0	714.803	577.863	627.097	516.217	396.997	501.425	0	569.884	571.017
RGMC.27947	d__Bacteria;p__Bacillota_A;c__Clostridia;o__Peptostreptococcales;f__Anaerovoracaceae;g__UBA3871;s__UBA3871 sp002392265	673.597	428.971	207.333	590.701	638.881	567.312	964.131	653.909	667.793	1039.04	529.653	651.941	844.563	888.148	628.803	793.08	806.094	801.048
RGMC.2798	d__Bacteria;p__Verrucomicrobiota;c__Kiritimatiellia;o__RFP12;f__UBA1067;g__RUG572;s__RUG572 sp900320225	515.157	299.013	312.717	393.329	431.502	275.637	528.713	314.962	480.331	714.31	402.006	459.73	539.702	559.915	419.738	460.543	387.226	384.826
RGMC.27985	d__Bacteria;p__Desulfobacterota;c__Desulfovibrionia;o__Desulfovibrionales;f__Desulfovibrionaceae;g__Desulfovibrio;s__Desulfovibrio sp002369295	670.167	565.654	0	532.674	500.398	483.07	573.469	500.239	437.489	771.96	570.917	493.864	437.297	482.136	473.049	575.444	515.995	502.562
RGMC.281	d__Bacteria;p__Bacillota_A;c__Clostridia;o__Saccharofermentanales;f__Saccharofermentanaceae;g__Saccharofermentans;s__Saccharofermentans sp016292135	772.387	445.503	0	909.618	998.173	668.811	944.72	589.374	633.579	2067.13	1317.26	1493.72	1329.68	1338.13	1421.22	891.801	962.843	952.056
RGMC.28143	d__Bacteria;p__Bacteroidota;c__Bacteroidia;o__Bacteroidales;f__Bacteroidaceae;g__UBA4372;s__UBA4372 sp900318115	207.405	0	0	0	0	0	0	0	0	0	0	0	0	0	0	0	0	0
RGMC.28222	d__Bacteria;p__Planctomycetota;c__Planctomycetia;o__Pirellulales;f__Thermoguttaceae;g__RUG369;s__RUG369 sp946541595	287.223	150.466	167.944	0	0	125.466	0	154.162	194.812	0	0	0	0	0	0	237.465	0	0
RGMC.28304	d__Bacteria;p__Bacillota_A;c__Clostridia;o__Lachnospirales;f__Lachnospiraceae;g__CAG-791;s__CAG-791 sp002449595	0	0	0	0	0	0	0	132.789	0	0	0	0	0	0	0	0	0	0
RGMC.28340	d__Bacteria;p__Planctomycetota;c__Planctomycetia;o__Pirellulales;f__Thermoguttaceae;g__RUG369;s__RUG369 sp946541595	297.207	153.023	168.313	0	0	127.835	0	132.295	206.087	0	0	0	0	0	0	230.271	0	0
RGMC.28349	d__Bacteria;p__Bacillota_A;c__Clostridia;o__Lachnospirales;f__Lachnospiraceae;g__Anaerobutyricum;s__Anaerobutyricum sp946538445	0	654.221	588.757	0	0	0	0	0	0	0	0	0	0	0	0	0	0	0
RGMC.28389	d__Bacteria;p__Bacillota_A;c__Clostridia;o__Lachnospirales;f__Lachnospiraceae;g__Eubacterium_Q;s__Eubacterium_Q sp900321215	0	186.812	205.958	0	0	152.713	0	154.179	168.488	0	0	0	0	0	0	0	0	0
RGMC.28431	d__Bacteria;p__Bacillota_A;c__Clostridia;o__Lachnospirales;f__Lachnospiraceae;g__G11;s__G11 sp947167445	681.879	488.052	360.425	596.038	500.714	505.791	455.732	472.488	543.659	0	0	0	0	0	0	648.641	0	364.533
RGMC.28440	d__Bacteria;p__Bacillota_A;c__Clostridia;o__Oscillospirales;f__Acutalibacteraceae;g__JAAZFZ01;s__JAAZFZ01 sp946626015	146.5	432.896	506.836	481.979	491.335	495.313	438.027	471.089	167.704	602.511	438.582	455.757	438.593	448.186	364.413	247.662	503.11	499.499
RGMC.2846	d__Bacteria;p__Fibrobacterota;c__Fibrobacteria;o__Fibrobacterales;f__Fibrobacteraceae;g__Fibrobacter;s__Fibrobacter sp946186895	219.519	136.407	0	168.353	140.783	117.356	157.081	137.364	235.463	218.214	113.649	139.079	232.014	252.544	178.867	260.89	212.949	211.42
RGMC.28517	d__Bacteria;p__Bacillota_A;c__Clostridia;o__Oscillospirales;f__Acutalibacteraceae;g__UBA1425;s__	0	221.391	314.678	262.243	312.503	278.759	237.781	327.342	0	528.57	424.23	440.022	420.176	485.537	329.067	0	291.392	289.985
RGMC.28592	d__Bacteria;p__Bacteroidota;c__Bacteroidia;o__Bacteroidales;f__Bacteroidaceae;g__Ga6A1;s__Ga6A1 sp900102385	0	0	0	0	0	0	254.951	0	0	0	0	0	0	0	0	0	0	0
RGMC.28623	d__Bacteria;p__Bacteroidota;c__Bacteroidia;o__Bacteroidales;f__Paludibacteraceae;g__RF16;s__RF16 sp900321775	923.715	564.585	652.095	456.343	276.465	485.832	413.937	402.235	883.735	0	0	0	0	0	0	674.576	315.807	317.01
RGMC.28626	d__Bacteria;p__Bacillota_A;c__Clostridia;o__Oscillospirales;f__Acutalibacteraceae;g__Eubacterium_R;s__Eubacterium_R sp017543415	0	0	0	0	0	596.237	0	414.596	0	0	0	0	359.095	0	398.861	0	0	0
RGMC.28641	d__Bacteria;p__Bacteroidota;c__Bacteroidia;o__Bacteroidales;f__UBA932;g__Bact-11;s__Bact-11 sp002361615	0	0	0	231.574	0	234.897	230.173	212.97	0	422.717	264.01	262.122	241.626	255.542	230.34	0	255.184	254.597
RGMC.28642	d__Bacteria;p__Bacillota_A;c__Clostridia;o__Lachnospirales;f__Lachnospiraceae;g__RUG11977;s__RUG11977 sp017427415	0	0	0	0	0	0	0	0	0	746.292	444.954	575.375	690.967	549.952	734.248	0	0	0
RGMC.28685	d__Bacteria;p__Bacteroidota;c__Bacteroidia;o__Bacteroidales;f__Paludibacteraceae;g__UBA1723;s__UBA1723 sp002371265	637.579	413.942	336.2	466.246	456.067	513.09	560.184	573.392	745.763	0	240.192	229.014	426.058	531.357	374.873	757.641	389.37	391.313
RGMC.28747	d__Bacteria;p__Bacteroidota;c__Bacteroidia;o__Bacteroidales;f__Bacteroidaceae;g__Prevotella;s__Prevotella sp016286585	2282.22	1660.6	2076.81	1098.35	1053.42	1247.83	1240.2	1342.37	1876.3	869.685	1258.98	1170.06	1532.91	1773.08	905.528	2107	1109.72	1091.98
RGMC.28807	d__Bacteria;p__Bacillota_A;c__Clostridia;o__Oscillospirales;f__Oscillospiraceae;g__Oscillibacter;s__Oscillibacter ruminantium	0	1446.23	2678.5	0	0	0	0	0	0	0	0	0	0	0	0	0	0	0
RGMC.28868	d__Bacteria;p__Bacillota_C;c__Negativicutes;o__Selenomonadales;f__Selenomonadaceae;g__Anaerovibrio;s__Anaerovibrio sp902785445	0	1365.85	1758.44	0	0	0	0	0	0	0	0	0	0	0	0	0	0	0
RGMC.28895	d__Bacteria;p__Bacillota_C;c__Negativicutes;o__Acidaminococcales;f__Acidaminococcaceae;g__Succiniclasticum;s__Succiniclasticum sp017443005	0	130.373	172.477	0	0	0	0	0	0	0	0	0	0	0	0	0	0	0
RGMC.28906	d__Bacteria;p__Bacteroidota;c__Bacteroidia;o__Bacteroidales;f__F082;g__Limimorpha;s__Limimorpha sp902789915	202.559	133.144	0	192.469	0	145.778	242.575	133.398	197.652	0	0	0	0	0	0	256.325	209.272	207.993
RGMC.28917	d__Bacteria;p__Bacteroidota;c__Bacteroidia;o__Bacteroidales;f__Paludibacteraceae;g__RF16;s__RF16 sp900321775	703.187	424.655	484.148	355.001	231.971	373.028	355.645	327.02	667.059	0	0	0	0	0	0	507.835	243.097	237.689
RGMC.28919	d__Bacteria;p__Bacillota_C;c__Negativicutes;o__Acidaminococcales;f__Acidaminococcaceae;g__Succiniclasticum;s__Succiniclasticum sp017443005	0	146.44	188.526	0	0	0	0	0	0	0	0	0	0	0	0	0	0	0
RGMC.28920	d__Bacteria;p__Bacillota_A;c__Clostridia;o__Oscillospirales;f__Oscillospiraceae;g__Limivicinus;s__Limivicinus sp900317375	788.587	1583.95	1683.23	1983.23	2097.91	1658.18	1578.14	1565.05	750.898	3131.47	3141.44	3239.51	2626.95	2626.6	2459.48	1224.99	2018.37	2013.82
RGMC.28922	d__Bacteria;p__Bacillota_C;c__Negativicutes;o__Acidaminococcales;f__Acidaminococcaceae;g__Succiniclasticum;s__Succiniclasticum sp017443005	0	195.304	287.937	0	0	0	0	0	0	0	0	0	0	0	0	0	0	0
RGMC.28931	d__Bacteria;p__Bacillota_I;c__Bacilli_A;o__RFN20;f__CAG-826;g__UBA2450;s__	158.231	0	0	142.601	0	131.487	165.395	152.129	241.02	0	0	0	0	0	0	199.495	0	0
RGMC.28941	d__Bacteria;p__Bacillota_C;c__Negativicutes;o__Acidaminococcales;f__Acidaminococcaceae;g__Succiniclasticum;s__Succiniclasticum sp017443005	0	179.658	195.309	0	0	0	0	0	0	0	0	0	0	0	0	0	0	0
RGMC.28942	d__Bacteria;p__Bacillota_A;c__Clostridia;o__Lachnospirales;f__Lachnospiraceae;g__UBA2868;s__UBA2868 sp017450065	0	0	352.616	0	0	0	0	0	0	0	0	0	0	0	0	0	0	0
RGMC.28945	d__Bacteria;p__Bacillota_A;c__Clostridia;o__Oscillospirales;f__Oscillospiraceae;g__Limivicinus;s__Limivicinus sp900317375	333.301	658.122	724.877	832.596	835.553	671.799	641.144	623.292	299.265	1266.43	1310.56	1347.01	1123.51	1124.98	1024.98	510.648	810.14	805.177
RGMC.28955	d__Bacteria;p__Bacteroidota;c__Bacteroidia;o__Bacteroidales;f__UBA932;g__Cryptobacteroides;s__	306.435	0	250.572	0	0	0	0	0	0	0	0	0	0	0	0	0	0	0
RGMC.28957	d__Archaea;p__Methanobacteriota;c__Methanobacteria;o__Methanobacteriales;f__Methanobacteriaceae;g__Methanobrevibacter_A;s__	272.884	420.159	0	0	0	370.458	0	422.219	0	0	0	0	0	0	0	0	0	644.724
RGMC.28964	d__Bacteria;p__Bacillota_I;c__Bacilli_A;o__RFN20;f__CAG-826;g__UBA2450;s__	165.344	0	0	0	0	150.318	205.933	174.925	256.876	0	0	0	0	0	0	216.594	0	0
RGMC.28968	d__Bacteria;p__Bacteroidota;c__Bacteroidia;o__Bacteroidales;f__F082;g__Limimorpha;s__Limimorpha sp905233685	0	0	0	0	1412.51	0	657.495	0	0	4781.43	2529.25	2597.28	3192.64	3465.18	2791.98	0	240.503	240.305
RGMC.28969	d__Bacteria;p__Bacteroidota;c__Bacteroidia;o__Bacteroidales;f__Bacteroidaceae;g__Prevotella;s__	7553.5	4117.01	3739.53	5502.87	6173.64	4942.24	6116.55	4603.5	7761.7	4476.74	3813.49	4230.46	4723.81	4587.92	4629.91	6843.9	4097.6	4099.58
RGMC.28971	d__Bacteria;p__Bacillota_A;c__Clostridia;o__Christensenellales;f__Aristaeellaceae;g__Aristaeella;s__	1039.21	2286.15	3019.21	2298.71	2698.55	2173.45	1750.88	2015.55	1382.54	2332.44	2718.32	2855.74	2083.1	1963.92	2257.73	1270.86	1980.66	1960.44
RGMC.28974	d__Bacteria;p__Bacillota_A;c__Clostridia;o__Oscillospirales;f__Oscillospiraceae;g__Limivicinus;s__Limivicinus sp900317375	487.593	1008.55	1097.77	1306.58	1370.52	1094.41	1078.07	1076.52	479.042	2130.95	1956.61	2021.69	1604.57	1728.62	1516.61	815.761	1412.68	1403.56
RGMC.28992	d__Bacteria;p__Bacillota_C;c__Negativicutes;o__Acidaminococcales;f__Acidaminococcaceae;g__Succiniclasticum;s__Succiniclasticum sp017443005	0	158.405	214.452	0	0	0	0	0	0	0	0	0	0	0	0	0	0	0
RGMC.28994	d__Bacteria;p__Bacillota_A;c__Clostridia;o__Oscillospirales;f__Oscillospiraceae;g__Limivicinus;s__Limivicinus sp900317375	341.926	697.655	693.228	931.415	1007.41	755.17	744.749	711.03	338.476	1828.38	1444.24	1545.06	1167.88	1199.86	1124.27	571.901	1063.45	1046.55
RGMC.290	d__Bacteria;p__Spirochaetota;c__Spirochaetia;o__Treponematales;f__Treponemataceae;g__Treponema_D;s__Treponema_D sp016281495	679.149	451.951	356.718	485.018	524.115	567.334	652.313	516.165	720.758	923.946	378.117	384.712	636.4	618.522	554.147	897.7	610.152	611.318
RGMC.29011	d__Archaea;p__Methanobacteriota;c__Methanobacteria;o__Methanobacteriales;f__Methanobacteriaceae;g__Methanobrevibacter_A;s__	172.118	276.582	0	0	0	184.04	0	245.122	0	0	0	0	0	0	0	0	0	0
RGMC.29017	d__Bacteria;p__Bacillota_C;c__Negativicutes;o__Acidaminococcales;f__Acidaminococcaceae;g__Succiniclasticum;s__Succiniclasticum sp017443005	167.078	166.006	210.143	0	0	0	0	0	0	0	0	0	0	0	0	0	0	0
RGMC.29021	d__Bacteria;p__Bacillota_C;c__Negativicutes;o__Acidaminococcales;f__Acidaminococcaceae;g__Succiniclasticum;s__Succiniclasticum sp017443005	0	231.073	243.02	0	0	0	0	0	0	0	0	0	0	0	0	0	0	0
RGMC.29043	d__Bacteria;p__Bacillota_A;c__Clostridia;o__Oscillospirales;f__Acutalibacteraceae;g__Eubacterium_R;s__Eubacterium_R sp017543415	0	383.741	0	419.805	372.421	486.072	350.468	563.296	0	0	327.602	344.621	379.481	404.598	326.868	0	366.78	367.087
RGMC.29048	d__Bacteria;p__Bacillota_A;c__Clostridia;o__Christensenellales;f__Aristaeellaceae;g__RUG563;s__RUG563 sp902764565	5551.72	4922.59	5014.31	4538.63	5000.56	4678.93	4482.51	4082.87	6150.98	7056.89	6000.8	6403.76	5342.17	5248.36	5685.01	4621.37	4795.44	4779.28
RGMC.29051	d__Bacteria;p__Bacillota_A;c__Clostridia;o__Christensenellales;f__DTU072;g__CAG-1782;s__CAG-1782 sp902766325	0	0	0	0	0	0	0	106.083	179.048	0	0	0	0	0	0	130.317	0	0
RGMC.29055	d__Bacteria;p__Bacillota_A;c__Clostridia;o__Oscillospirales;f__Oscillospiraceae;g__Limivicinus;s__Limivicinus sp900317375	0	409.073	418.315	555.795	537.813	413.493	406.322	374.196	0	870.825	795.66	824.284	621.2	645.499	598.927	348.122	576.657	568.45
RGMC.29102	d__Bacteria;p__Spirochaetota;c__Spirochaetia;o__Treponematales;f__Treponemataceae;g__Treponema_D;s__Treponema_D sp902789325	2410.43	1541.22	1544.48	1543.5	1324.68	1703.54	1355.49	1519.48	3002.13	0	397.857	0	713.705	810.049	838.393	2444.61	1019.69	1004.39
RGMC.29187	d__Bacteria;p__Bacteroidota;c__Bacteroidia;o__Bacteroidales;f__Bacteroidaceae;g__Ga6A1;s__Ga6A1 sp900102385	185.833	0	0	0	0	0	210.51	0	174.874	0	0	0	0	0	0	181.515	0	0
RGMC.292	d__Bacteria;p__Bacillota_A;c__Clostridia;o__Saccharofermentanales;f__Saccharofermentanaceae;g__Firm-16;s__Firm-16 sp016281535	0	904.541	701.63	877.799	809.48	770.435	553.797	604.986	469.441	1143.78	1030.29	1083.78	642.445	686.19	805.366	563.478	744.378	721.885
RGMC.29206	d__Archaea;p__Halobacteriota;c__Methanomicrobia;o__Methanomicrobiales;f__Methanomicrobiaceae;g__Methanomicrobium;s__Methanomicrobium mobile	3816.76	1633.16	2117.04	925.001	1214.95	758.444	1564.85	2214.83	4114.23	2640.2	815.499	1043.34	1357.04	1195.39	1030.86	2541.3	1602.23	1572.46
RGMC.29207	d__Bacteria;p__Bacillota_A;c__Clostridia;o__Christensenellales;f__Aristaeellaceae;g__UBA1224;s__UBA1224 sp002309235	148.525	0	0	180.55	179.609	136.574	181.705	0	0	315.811	257.017	278.587	216.992	196.04	231.445	180.23	200.312	203.047
RGMC.29209	d__Bacteria;p__Bacillota_A;c__Clostridia;o__Christensenellales;f__Aristaeellaceae;g__RUG563;s__	0	0	0	0	0	0	0	0	0	812.802	531.144	535.96	417.115	405.412	418.66	0	0	0
RGMC.29211	d__Bacteria;p__Bacillota_A;c__Clostridia;o__Christensenellales;f__Aristaeellaceae;g__SFMI01;s__SFMI01 sp017544935	0	0	0	0	0	118.188	0	0	0	0	0	0	0	0	0	0	120.436	111.924
RGMC.29220	d__Bacteria;p__UBP6;c__UBA1177;o__UBA1177;f__UBA1177;g__UBA1177;s__UBA1177 sp002309575	0	0	0	0	582.794	0	345.949	0	0	2325.17	1159.11	1371.01	2099.8	2366	1385.54	0	154.398	152.706
RGMC.29224	d__Bacteria;p__Bacillota_A;c__Clostridia;o__Lachnospirales;f__Lachnospiraceae;g__CAG-791;s__CAG-791 sp946410365	0	236.127	209.952	0	0	0	0	0	0	0	0	0	0	0	0	0	0	0
RGMC.29226	d__Bacteria;p__Bacillota_A;c__Clostridia;o__Christensenellales;f__CAG-1252;g__CAG-1252;s__CAG-1252 sp002308575	133.637	0	0	167.307	140.112	111.013	209.666	136.503	172.577	0	0	0	0	0	96.5153	236.372	115.139	108.023
RGMC.29228	d__Bacteria;p__Bacillota_A;c__Clostridia;o__Lachnospirales;f__Lachnospiraceae;g__RGIG5612;s__RGIG5612 sp017511185	244.856	693.624	948.32	519.194	434.179	705.971	457.846	947.18	273.169	349.941	403.684	415.811	411.086	476.63	406.403	350.322	520.332	509.758
RGMC.29229	d__Bacteria;p__Bacteroidota;c__Bacteroidia;o__Bacteroidales;f__VadinHA17;g__DUOU01;s__	0	0	0	0	0	0	141.011	0	0	154.845	0	0	129.181	156.163	118.332	97.8088	0	0
RGMC.29234	d__Archaea;p__Halobacteriota;c__Methanomicrobia;o__Methanomicrobiales;f__Methanomicrobiaceae;g__Methanomicrobium;s__Methanomicrobium mobile	3496.15	1415.28	1713.02	864.634	1081.67	667.251	1377.12	1875.65	3717.75	2481.3	780.652	1002.91	1255.51	1104	979.98	2512.94	1527.31	1495.54
RGMC.29242	d__Bacteria;p__Bacteroidota;c__Bacteroidia;o__Bacteroidales;f__Paludibacteraceae;g__UBA1723;s__UBA1723 sp002371265	904.768	600.553	470.667	686.983	647.755	749.216	821.441	856.16	1084.67	317.994	347.654	323.108	619.658	767.476	545.378	1079.22	556.663	549.229
RGMC.2925	d__Bacteria;p__Bacillota_C;c__Negativicutes;o__Acidaminococcales;f__Acidaminococcaceae;g__Succiniclasticum;s__Succiniclasticum sp017443005	195.437	189.558	235.435	0	0	0	0	145.252	0	0	0	0	0	0	0	0	0	0
RGMC.29254	d__Bacteria;p__Bacteroidota;c__Bacteroidia;o__Bacteroidales;f__UBA1715;g__UBA1715;s__UBA1715 sp017516865	153.188	0	0	0	0	0	0	0	176.88	0	0	0	0	0	0	157.196	0	0
RGMC.29257	d__Bacteria;p__Bacteroidota;c__Bacteroidia;o__Bacteroidales;f__WCHB1-69;g__UBA1756;s__UBA1756 sp900321845	0	0	0	217.825	493.316	0	483.92	0	0	372.224	311.157	359.399	339.643	335.865	362.042	161.624	366.94	355.458
RGMC.29261	d__Bacteria;p__Bacillota_A;c__Clostridia;o__Lachnospirales;f__Lachnospiraceae;g__UBA3774;s__	0	134.684	0	228.594	295.761	231.372	268.113	229.843	0	270.007	375.952	372.576	353.679	334.413	324.768	0	292.223	296.018
RGMC.29269	d__Bacteria;p__Bacillota_I;c__Bacilli_A;o__ML615J-28;f__CAG-698;g__Tener-01;s__Tener-01 sp001604495	0	0	0	0	0	0	0	0	0	0	0	0	0	146.453	0	0	0	0
RGMC.29278	d__Bacteria;p__Bacteroidota;c__Bacteroidia;o__Bacteroidales;f__UBA932;g__Cryptobacteroides;s__Cryptobacteroides sp002309995	188.92	0	118.582	0	0	0	0	0	200.393	159.539	0	0	0	0	0	0	131.62	132.992
RGMC.29284	d__Bacteria;p__Bacillota_A;c__Clostridia;o__Christensenellales;f__Aristaeellaceae;g__RUG14130;s__RUG14130 sp017648805	0	0	0	0	0	0	0	0	0	174.097	169.296	164.457	0	0	138.474	0	0	0
RGMC.29288	d__Bacteria;p__Bacillota_A;c__Clostridia;o__Lachnospirales;f__Lachnospiraceae;g__G11;s__G11 sp900103495	932.646	697.941	584.223	804.762	721.245	696.374	646.417	708.017	807.277	290.629	277.355	294.267	353.23	344.843	362.162	870.175	505.809	506.843
RGMC.29290	d__Bacteria;p__Bacillota_A;c__Clostridia;o__Lachnospirales;f__Lachnospiraceae;g__UBA1201;s__UBA1201 sp002309675	181.535	399.289	401.593	290.514	254.816	350.047	210.782	411.925	195.99	154.14	131.21	172.3	146.798	143.14	136.356	185.129	287.244	279.7
RGMC.29297	d__Bacteria;p__Bacillota_A;c__Clostridia;o__Christensenellales;f__Aristaeellaceae;g__Aristaeella;s__Aristaeella sp017427165	0	0	0	0	0	0	0	0	0	337.383	225.77	0	0	0	0	0	0	0
RGMC.29299	d__Bacteria;p__Bacteroidota;c__Bacteroidia;o__Bacteroidales;f__UBA932;g__Cryptobacteroides;s__Cryptobacteroides sp902761655	0	0	0	0	0	0	0	0	0	150.068	109.133	117.084	125.386	123.863	122.896	0	0	0
RGMC.29304	d__Bacteria;p__Chloroflexota;c__Dehalococcoidia;o__Dehalococcoidales;f__UBA1222;g__UBA1222;s__UBA1222 sp002309415	172.902	0	0	160.383	187.103	130.831	341.886	162.238	201.407	0	0	0	262.194	299.869	204.899	270.2	179.864	182.71
RGMC.29312	d__Bacteria;p__Bacillota_A;c__Clostridia;o__Lachnospirales;f__Lachnospiraceae;g__RGIG5612;s__RGIG5612 sp017511185	319.374	949.551	1240.73	668.632	559.212	903.278	566.086	1146.85	344.206	437.87	547.183	553.962	510.126	567.378	527.569	439.521	653.724	658.1
RGMC.29315	d__Bacteria;p__Bacillota_A;c__Clostridia;o__Christensenellales;f__Aristaeellaceae;g__RUG14130;s__RUG14130 sp017552535	203.713	136.228	0	194.407	218.419	160.68	208.564	175.277	141.796	493.997	403.385	397.179	364.34	382.874	342.41	201.304	204.229	207.166
RGMC.29317	d__Bacteria;p__Bacillota_A;c__Clostridia;o__Oscillospirales;f__Ruminococcaceae;g__RUG11783;s__RUG11783 sp902772615	437.627	646.621	794.74	597.367	456.421	699.503	428.564	726.912	369.722	702.45	633.766	698.22	580.415	516.066	561.607	414.741	590.275	580.878
RGMC.29322	d__Bacteria;p__UBA3054;c__UBA3054;o__UBA3054;f__UBA3054;g__UBA3054;s__UBA3054 sp002366995	827.898	368.962	196.312	581.444	719.479	475.05	944.402	618.394	773.84	1095.64	868.028	862.003	1075.79	1164.38	930.619	867.469	653.785	647.688
RGMC.29326	d__Bacteria;p__Bacteroidota;c__Bacteroidia;o__Bacteroidales;f__UBA932;g__Cryptobacteroides;s__Cryptobacteroides sp946184255	339.653	200.526	220.089	192.627	0	177.047	189.266	180.01	249.466	246.255	190.09	188.898	198.013	189.328	172.424	257.867	174.99	180.942
RGMC.29331	d__Bacteria;p__Verrucomicrobiota;c__Verrucomicrobiae;o__Limisphaerales;f__UBA1412;g__UBA1412;s__UBA1412 sp002308515	382.204	205.09	202.825	236.12	168.786	226.592	285.478	286.227	397.277	444.884	122.665	130.979	235.44	250.208	153.906	418.35	200.919	204.66
RGMC.29333	d__Bacteria;p__Bacteroidota;c__Bacteroidia;o__Bacteroidales;f__Muribaculaceae;g__RUG14106;s__RUG14106 sp017552595	0	109.784	198.428	262.396	214.204	152.865	234.088	200.798	189.172	164.862	109.305	158.89	181.364	179.791	154.345	249.831	183.115	191.903
RGMC.29335	d__Bacteria;p__Bacteroidota;c__Bacteroidia;o__Bacteroidales;f__Bacteroidaceae;g__UBA1179;s__	9249.09	5793.82	5915.38	5196.69	4190.05	5494.41	6017.22	5694.01	10692.1	2060.77	2174.79	2708.4	3937.97	3948.42	3848.88	8583.58	4187.55	4173.05
RGMC.29345	Unclassified	257.497	239.852	589.078	189.645	214.927	0	262.902	198.247	574.959	0	0	0	0	0	0	0	0	0
RGMC.29357	d__Bacteria;p__Bacteroidota;c__Bacteroidia;o__Bacteroidales;f__UBA932;g__Cryptobacteroides;s__	1003.38	713.819	820.761	585.846	665.064	601.937	638.271	587.423	1158.91	494.561	439.57	403.334	595.987	501.851	557.376	689.343	419.531	425.998
RGMC.29363	d__Bacteria;p__Bacteroidota;c__Bacteroidia;o__Bacteroidales;f__Paludibacteraceae;g__RF16;s__	300.14	200.78	233.696	168.75	0	164.802	180.395	163.291	334.721	0	0	0	0	0	0	312.765	0	154.374
RGMC.29372	d__Bacteria;p__Bacillota_C;c__Negativicutes;o__Acidaminococcales;f__Acidaminococcaceae;g__Succiniclasticum;s__Succiniclasticum sp017443005	0	151.935	197.564	0	0	0	0	0	0	0	0	0	0	0	0	0	0	0
RGMC.29396	d__Bacteria;p__Bacillota_C;c__Negativicutes;o__Acidaminococcales;f__Acidaminococcaceae;g__Succiniclasticum;s__Succiniclasticum sp017443005	202.341	180.627	232.6	162.42	0	0	0	143.81	158.681	0	0	0	0	0	0	0	0	126.125
RGMC.29402	d__Bacteria;p__Bacillota_A;c__Clostridia;o__Christensenellales;f__Aristaeellaceae;g__Ventricola;s__Ventricola sp017458865	1150.95	2183.17	1770.65	1179.95	652.419	1336.02	591.395	1698.64	1245.67	0	263.977	0	214.389	187.327	224.831	939.651	523.612	517.665
RGMC.29424	d__Bacteria;p__Bacteroidota;c__Bacteroidia;o__Bacteroidales;f__Bacteroidaceae;g__Ga6A1;s__Ga6A1 sp900102385	0	0	0	0	0	0	326.368	0	258.409	0	0	0	0	0	0	0	0	0
RGMC.29426	d__Bacteria;p__Bacillota_A;c__Clostridia;o__Lachnospirales;f__Lachnospiraceae;g__Eubacterium_Q;s__Eubacterium_Q sp900321215	0	208.035	222.233	0	0	177.483	0	162.184	197.057	0	0	0	0	0	0	0	0	0
RGMC.29446	d__Bacteria;p__Bacillota_A;c__Clostridia;o__Oscillospirales;f__Oscillospiraceae;g__Limivicinus;s__Limivicinus sp902789835	0	445.854	388.794	562.479	596.128	417.569	419.337	296.452	0	596.591	981.115	1055.59	801.058	620.498	839.12	0	571.428	554.469
RGMC.29473	d__Bacteria;p__Bacillota_C;c__Negativicutes;o__Acidaminococcales;f__Acidaminococcaceae;g__Succiniclasticum;s__Succiniclasticum sp017443005	0	0	122.443	0	0	0	0	0	0	0	0	0	0	0	0	0	0	0
RGMC.29487	d__Archaea;p__Methanobacteriota;c__Methanobacteria;o__Methanobacteriales;f__Methanobacteriaceae;g__Methanobrevibacter;s__	1072.81	2531.89	0	3555.19	2554.26	6579.69	2831.8	8397.3	1934.39	1692.91	1574.82	1610.2	1510.17	1883.86	1546.32	2420.69	2634.19	2602.58
RGMC.29494	d__Bacteria;p__Bacillota_A;c__Clostridia;o__Lachnospirales;f__Lachnospiraceae;g__UBA3633;s__UBA3633 sp902803205	0	0	1139.29	0	0	0	0	0	0	0	0	0	0	0	0	0	0	0
RGMC.29513	d__Bacteria;p__Bacillota_A;c__Clostridia;o__Christensenellales;f__Aristaeellaceae;g__UBA2862;s__UBA2862 sp902777335	0	0	212.442	958.149	1871.38	0	692.271	0	0	693.498	2066.61	2677.79	1517.93	1302.34	1928.64	0	869.835	870.255
RGMC.29518	d__Bacteria;p__Bacteroidota;c__Bacteroidia;o__Bacteroidales;f__Bacteroidaceae;g__UBA1179;s__	1164	666.389	688.904	855.856	747.267	979.898	926.474	964.455	1584.62	251.817	276.098	386.015	655.483	627.681	612.078	1134.79	557.882	565.309
RGMC.2952	d__Bacteria;p__Planctomycetota;c__Planctomycetia;o__Pirellulales;f__Thermoguttaceae;g__RUG369;s__RUG369 sp900317365	240.819	136.339	138.694	0	0	0	0	0	199.047	0	0	0	0	0	0	0	0	0
RGMC.29524	d__Bacteria;p__Bacteroidota;c__Bacteroidia;o__Bacteroidales;f__Bacteroidaceae;g__Prevotella;s__Prevotella sp016286575	308.697	0	0	0	0	0	0	0	259.688	0	0	0	0	0	0	0	0	0
RGMC.29530	d__Bacteria;p__Bacillota_A;c__Clostridia;o__Christensenellales;f__Aristaeellaceae;g__UBA2862;s__UBA2862 sp902777335	0	0	261.626	1287.91	2493.25	0	813.309	0	0	854.973	2674.14	3494.45	1778.86	1248.45	2550.88	0	1058.66	1060.06
RGMC.29535	d__Bacteria;p__Bacteroidota;c__Bacteroidia;o__Bacteroidales;f__UBA932;g__RUG11257;s__RUG11257 sp017527625	689.044	428.373	484.223	323.207	212.501	351.655	333.819	396.548	681.09	142.15	120.704	0	148.021	161.064	148.795	513.845	242.341	239.722
RGMC.29540	d__Bacteria;p__Bacteroidota;c__Bacteroidia;o__Bacteroidales;f__P3;g__UBA1711;s__UBA1711 sp900317125	340.303	0	219.734	0	0	0	0	0	0	0	0	0	0	0	0	0	0	0
RGMC.29550	d__Bacteria;p__Bacillota_A;c__Clostridia;o__Oscillospirales;f__Oscillospiraceae;g__Limivicinus;s__Limivicinus sp902789835	0	239.808	0	256.04	255.107	249.609	215.878	240.266	0	228.928	327.196	310.151	236.667	277.789	256.663	0	248.049	248.136
RGMC.29559	d__Bacteria;p__Bacillota_A;c__Clostridia;o__Oscillospirales;f__Oscillospiraceae;g__Limivicinus;s__Limivicinus sp900317375	375.297	796.39	747.896	1005.1	1095.55	907.383	856.822	876.279	406.246	1793.38	1468.36	1476.74	1147.56	1296.13	1127.69	593.049	1098.63	1104.39
RGMC.29565	d__Bacteria;p__Bacillota_C;c__Negativicutes;o__Acidaminococcales;f__Acidaminococcaceae;g__Succiniclasticum;s__Succiniclasticum sp017443005	0	140.91	179.594	0	0	0	0	0	0	0	0	0	0	0	0	0	0	0
RGMC.29574	d__Bacteria;p__Bacteroidota;c__Bacteroidia;o__Bacteroidales;f__F082;g__Limimorpha;s__Limimorpha sp902801465	0	0	0	178.309	0	125.75	159.654	0	110.558	0	0	0	0	0	0	226.072	144.866	141.412
RGMC.29590	d__Bacteria;p__Bacillota_I;c__Bacilli_A;o__Acholeplasmatales;f__Anaeroplasmataceae;g__Anaeroplasma;s__	263.392	174.052	0	0	0	189.969	0	254.983	392.289	0	0	0	0	0	0	200.539	0	0
RGMC.29598	d__Bacteria;p__Bacillota_C;c__Negativicutes;o__Acidaminococcales;f__Acidaminococcaceae;g__Succiniclasticum;s__Succiniclasticum sp017443005	244.696	230.766	334.104	202.451	0	0	196.604	203.944	197.207	0	0	0	0	0	0	0	169.124	167.453
RGMC.29605	d__Bacteria;p__Bacteroidota;c__Bacteroidia;o__Bacteroidales;f__UBA932;g__Cryptobacteroides;s__Cryptobacteroides sp902774145	0	0	0	0	0	0	0	0	0	197.142	0	0	123.54	0	116.029	0	0	0
RGMC.29611	d__Bacteria;p__Bacillota_A;c__Clostridia;o__Lachnospirales;f__Lachnospiraceae;g__RUG191;s__RUG191 sp905234245	1500.61	2344.89	2462.09	2670.97	1604.25	2739.48	1964.14	2053.65	1251.96	0	2106.82	0	1818.53	0	1988.85	2098.02	3315.93	3228.74
RGMC.29618	d__Bacteria;p__Bacteroidota;c__Bacteroidia;o__Bacteroidales;f__UBA932;g__RUG11257;s__RUG11257 sp017527625	484.382	298.81	330.177	227.612	160.41	245.64	230.292	256.184	475.799	0	0	0	0	0	111.013	347.098	173.233	176.912
RGMC.29638	d__Archaea;p__Methanobacteriota;c__Methanobacteria;o__Methanobacteriales;f__Methanobacteriaceae;g__Methanobrevibacter_A;s__	5549.08	8894.94	1746.25	20010.3	34201.4	18743.4	28014.5	19364.6	5018.74	31064.8	35196.2	32057.1	38301	46854.3	35218.3	11847.4	30637.8	30405.9
RGMC.29639	d__Bacteria;p__Bacillota_A;c__Clostridia;o__Lachnospirales;f__Lachnospiraceae;g__UBA3633;s__	0	0	219.159	0	0	0	0	0	0	0	0	0	0	0	0	0	0	0
RGMC.29644	d__Bacteria;p__Bacillota_C;c__Negativicutes;o__Acidaminococcales;f__Acidaminococcaceae;g__Succiniclasticum;s__Succiniclasticum sp017443005	150.001	140.783	176.284	0	0	0	0	0	0	0	0	0	0	0	0	0	0	104.759
RGMC.29645	d__Bacteria;p__Bacteroidota;c__Bacteroidia;o__Bacteroidales;f__Bacteroidaceae;g__UBA4372;s__	545.252	255.448	217.311	346.26	287.051	273.043	377.965	267.549	495.433	153.708	175.088	182.227	217.686	188.065	223.562	684.854	325.719	312.049
RGMC.29659	d__Bacteria;p__Bacillota_C;c__Negativicutes;o__Acidaminococcales;f__Acidaminococcaceae;g__Succiniclasticum;s__Succiniclasticum sp017443005	0	97.5872	134.169	0	0	0	0	0	0	0	0	0	0	0	0	0	0	0
RGMC.29665	d__Bacteria;p__Bacillota_C;c__Negativicutes;o__Acidaminococcales;f__Acidaminococcaceae;g__Succiniclasticum;s__Succiniclasticum sp017443005	0	0	185.98	0	0	0	0	0	0	0	0	0	0	0	0	0	0	0
RGMC.29689	d__Bacteria;p__Bacillota_A;c__Clostridia;o__Saccharofermentanales;f__Saccharofermentanaceae;g__Saccharofermentans;s__	1891.13	4106.04	2834.01	7242.18	9932.55	5392.51	6674.03	4380.29	2796.43	18114.6	11758.9	13502.5	6990.31	8344.32	9414.79	4341.49	8038.06	7927.35
RGMC.29695	d__Bacteria;p__Bacteroidota;c__Bacteroidia;o__Bacteroidales;f__UBA932;g__Cryptobacteroides;s__	686.047	422.397	436.243	429.761	322.753	389.279	327.802	319.346	593.158	0	205.796	237.58	239.738	223.307	255.914	529.885	308.545	305.7
RGMC.29705	d__Bacteria;p__Bacillota_C;c__Negativicutes;o__Acidaminococcales;f__Acidaminococcaceae;g__Succiniclasticum;s__Succiniclasticum sp017443005	0	140.885	176.857	0	0	0	0	0	0	0	0	0	0	0	0	0	0	0
RGMC.29724	d__Bacteria;p__Bacteroidota;c__Bacteroidia;o__Bacteroidales;f__WCHB1-69;g__F23-D06;s__F23-D06 sp017540505	0	0	0	273.226	657.794	134.17	541.13	97.3127	111.01	839.921	590.07	650.12	649.522	663.554	636.407	282.973	375.308	369.408
RGMC.29759	d__Bacteria;p__Bacteroidota;c__Bacteroidia;o__Bacteroidales;f__UBA932;g__Cryptobacteroides;s__	1882.63	1402.65	1511.37	1247.13	1091.4	1199.66	987.75	1164.62	1191.83	1298.99	1111.38	1174.79	1029.8	1068.37	1011.13	1370.3	1121.45	1121.28
RGMC.29875	d__Bacteria;p__Bacillota_A;c__Clostridia;o__Lachnospirales;f__Lachnospiraceae;g__Anaerostipes;s__	0	1618.71	1748.1	0	0	2147.33	0	0	0	0	0	0	0	0	0	0	2003.84	1943.05
RGMC.29896	d__Archaea;p__Methanobacteriota;c__Methanobacteria;o__Methanobacteriales;f__Methanobacteriaceae;g__Methanobrevibacter;s__Methanobrevibacter sp937898925	153.776	376.661	0	850.617	679.601	1276.77	660.05	1379.15	375.345	601.095	513.337	546.391	461.798	540.443	502.222	449.662	565.762	566.995
RGMC.29898	d__Bacteria;p__Bacillota_A;c__Clostridia;o__Christensenellales;f__Aristaeellaceae;g__Aristaeella;s__	0	1334.48	1783.36	1696.09	1771.85	1539.99	850.908	853.365	0	2111.56	1892.47	2309.88	1185.23	980.613	1733.49	0	1656.42	1638.71
RGMC.29899	d__Bacteria;p__Bacteroidota;c__Bacteroidia;o__Bacteroidales;f__Bacteroidaceae;g__Prevotella;s__Prevotella sp902800435	1409.23	834.27	896.757	776.799	632.167	662.616	641.757	596.054	991.573	488.975	586.259	594.242	557.355	447.208	537.03	1150.29	646.11	638.645
RGMC.2990	d__Bacteria;p__Bacillota_A;c__Clostridia;o__Lachnospirales;f__Lachnospiraceae;g__CAG-791;s__CAG-791 sp002449595	0	0	0	0	0	0	0	138.877	0	0	0	0	0	0	0	0	0	0
RGMC.29904	d__Bacteria;p__Bacillota_C;c__Negativicutes;o__Acidaminococcales;f__Acidaminococcaceae;g__Succiniclasticum;s__Succiniclasticum sp017443005	0	0	182.249	0	0	0	0	0	0	0	0	0	0	0	0	0	0	0
RGMC.29927	d__Bacteria;p__Bacillota_A;c__Clostridia;o__Lachnospirales;f__Lachnospiraceae;g__RGIG5612;s__RGIG5612 sp017511185	230.487	759.197	1156.21	595.027	500.518	801.246	524.583	1102.43	298.754	413.491	477.015	495.469	464.188	555.992	460.634	381.129	618.307	621.443
RGMC.29938	d__Bacteria;p__Bacillota_A;c__Clostridia;o__Christensenellales;f__CAG-138;g__UBA3792;s__UBA3792 sp017428025	0	0	0	0	179.176	140.683	155.525	147.791	0	0	244.757	277.64	216.806	222.02	214.237	0	173.187	173.747
RGMC.29947	d__Bacteria;p__Bacillota_A;c__Clostridia;o__Christensenellales;f__Aristaeellaceae;g__RUG563;s__	0	0	0	0	0	0	0	296.9	0	0	0	0	0	0	0	0	0	0
RGMC.2995	d__Bacteria;p__Bacillota_A;c__Clostridia;o__Lachnospirales;f__Lachnospiraceae;g__Oribacterium;s__Oribacterium sp002371295	0	1068.53	1206.15	1193.31	1686.16	1301.51	729.48	590.265	0	0	738.584	0	0	0	0	0	1024.29	1015.47
RGMC.29958	d__Bacteria;p__Bacteroidota;c__Bacteroidia;o__Bacteroidales;f__UBA932;g__Bact-11;s__Bact-11 sp017447265	2823.15	1869.15	2277.59	1736.61	1611.52	1794.56	2116.03	2090.33	2515.66	1153.02	1108.11	952.258	1311.18	1378.89	1043.56	2185.91	1570.45	1566.69
RGMC.29978	d__Bacteria;p__Bacteroidota;c__Bacteroidia;o__Bacteroidales;f__SZUA-534;g__RUG13583;s__	5239.28	3497.23	3586.76	2722.78	2123.32	2886.62	3001.98	3367.17	5356.55	2374.61	1658.74	1765.85	2472.61	2780.18	2529.91	4836.28	2469.69	2452.81
RGMC.29979	d__Bacteria;p__Bacteroidota;c__Bacteroidia;o__Bacteroidales;f__ML635J-15;g__Bact-19;s__Bact-19 sp902791865	0	0	0	0	0	0	0	0	0	0	300.677	340.363	480.09	531.436	449.442	0	0	0
RGMC.29990	d__Bacteria;p__Bacillota_A;c__Clostridia;o__Peptostreptococcales;f__Peptostreptococcaceae;g__Terrisporobacter;s__Terrisporobacter othiniensis	0	0	355.284	0	0	0	0	0	0	0	0	0	0	0	0	0	0	0
RGMC.29999	d__Bacteria;p__Bacteroidota;c__Bacteroidia;o__Bacteroidales;f__UBA932;g__Bact-11;s__Bact-11 sp017447265	4663.73	2938.75	3263.38	2955.04	2411.95	2789.1	3092.39	2702.61	4277.91	1969.52	1652.97	1539.65	1820.08	1686.6	1657.12	3692.23	2453.17	2458.25
RGMC.3008	d__Bacteria;p__Pseudomonadota;c__Alphaproteobacteria;o__Rs-D84;f__Rs-D84;g__Enterousia;s__Enterousia sp002373935	486.034	265.133	127.522	159.177	0	362.889	0	282.275	593.147	0	0	0	0	0	0	323.928	0	0
RGMC.30149	d__Bacteria;p__Bacillota_A;c__Clostridia;o__Christensenellales;f__Aristaeellaceae;g__RUG563;s__RUG563 sp017443295	41425.9	41593.9	31100.3	36882.8	43310.9	32515.2	27285.9	23881.3	50695.6	19432.5	38245.6	37240.6	28954.7	22230.3	32367.3	36336.6	30051.5	29744.8
RGMC.30185	d__Bacteria;p__Bacteroidota;c__Bacteroidia;o__Bacteroidales;f__Paludibacteraceae;g__UBA1723;s__UBA1723 sp002371265	3772.16	2549.94	2009.49	2901.93	2829.71	3216.37	3641.73	3798.19	4649.13	1343.49	1487.97	1396.38	2686.72	3421.75	2351.19	4550.65	2391.98	2380.05
RGMC.30236	d__Bacteria;p__Pseudomonadota;c__Gammaproteobacteria;o__Enterobacterales;f__Succinivibrionaceae;g__Ruminobacter;s__Ruminobacter sp002309455	0	0	1101.86	0	0	0	0	0	0	0	0	0	0	0	0	0	0	0
RGMC.30249	d__Bacteria;p__Spirochaetota;c__Spirochaetia;o__Sphaerochaetales;f__Sphaerochaetaceae;g__RUG14846;s__	0	0	0	118.786	0	0	216.553	133.811	188.258	0	0	0	0	0	0	202.618	0	0
RGMC.30299	d__Bacteria;p__Fibrobacterota;c__Fibrobacteria;o__Fibrobacterales;f__Fibrobacteraceae;g__Fibrobacter;s__Fibrobacter sp017530965	3170.91	1843.59	1632.31	1935.85	2043.31	2038.67	2257.85	1927.06	3813.51	413.237	545.619	545.993	874.024	924.176	780.474	2748.38	1389.05	1383.94
RGMC.30310	d__Bacteria;p__Pseudomonadota;c__Gammaproteobacteria;o__Enterobacterales;f__Succinivibrionaceae;g__Ruminobacter;s__Ruminobacter sp002309455	0	0	234.074	0	0	0	0	0	0	0	0	0	0	0	0	0	0	0
RGMC.30313	d__Bacteria;p__Fibrobacterota;c__Fibrobacteria;o__Fibrobacterales;f__Fibrobacteraceae;g__Fibrobacter;s__Fibrobacter sp002210345	592.223	358.988	335.846	297.314	278.09	403.352	334.231	407.491	640.751	0	0	0	0	0	0	509.324	187.431	185.354
RGMC.30381	d__Bacteria;p__Bacteroidota;c__Bacteroidia;o__Bacteroidales;f__UBA3824;g__UBA3824;s__	1098.16	588.802	551.106	539.242	480.499	593.972	639.68	650.153	1393.39	220.817	125.066	165.498	323.385	238.185	176.891	550.602	445.975	435.096
RGMC.3057	d__Bacteria;p__Bacillota_A;c__Clostridia;o__Oscillospirales;f__Oscillospiraceae;g__Limivicinus;s__Limivicinus sp900319695	0	503.941	0	755.857	785.199	544.647	596.977	329.046	0	0	0	0	0	0	0	0	624.175	617.813
RGMC.30650	d__Bacteria;p__Bacteroidota;c__Bacteroidia;o__Bacteroidales;f__UBA3663;g__UBA3663;s__UBA3663 sp902776605	1810.12	1344.71	1456.4	1054.92	767.897	1371.67	1114.58	1215.81	2205.76	358.193	294.382	348.451	565.999	538.058	483.849	1651.69	779.128	790.893
RGMC.30719	d__Bacteria;p__Bacillota_A;c__Clostridia;o__Oscillospirales;f__Acutalibacteraceae;g__Ruminococcus_E;s__Ruminococcus_E sp902776375	0	22894.6	20488.5	22168.2	22491.7	27534.7	12056.3	15852.7	0	7417.24	9790.73	13208.5	8814.86	8002.43	11175	9609.01	21379.3	21295.7
RGMC.31	d__Bacteria;p__Bacteroidota;c__Bacteroidia;o__Bacteroidales;f__Bacteroidaceae;g__UBA4372;s__UBA4372 sp017427185	183.034	0	0	0	0	0	0	0	0	0	0	0	0	0	0	213.208	0	0
RGMC.31045	d__Bacteria;p__Bacteroidota;c__Bacteroidia;o__Bacteroidales;f__Bacteroidaceae;g__UBA1179;s__UBA1179 sp902782245	419.027	270.074	389.261	199.29	172.835	230.799	257.399	243.887	483.641	168.786	0	0	167.639	178.989	149.251	327.248	162.688	163.502
RGMC.31112	d__Bacteria;p__Bacillota_A;c__Clostridia;o__Peptostreptococcales;f__Anaerovoracaceae;g__RUG099;s__	0	0	0	392.581	250.719	440.558	214.978	287.75	0	242.733	269.864	288.201	281.406	242.809	281.083	0	464.614	461.19
RGMC.31163	d__Bacteria;p__Bacteroidota;c__Bacteroidia;o__Bacteroidales;f__Paludibacteraceae;g__UBA1723;s__UBA1723 sp002371265	3553.6	2406.74	1899.29	2790.8	2714.23	3117.09	3496.18	3610.7	4506.36	1271.73	1428.65	1330.59	2642.24	3336.36	2345.87	4290.82	2266.8	2266.62
RGMC.31624	d__Bacteria;p__Bacillota;c__Bacilli;o__Lactobacillales;f__Streptococcaceae;g__Streptococcus;s__Streptococcus equinus	0	0	0	0	0	0	0	0	0	365.423	0	0	0	0	0	0	0	0
RGMC.319	d__Bacteria;p__Bacillota_A;c__Clostridia;o__Oscillospirales;f__Oscillospiraceae;g__Faecousia;s__Faecousia sp016282135	0	0	0	273.772	689.855	0	609.385	0	0	1324.76	1407.28	1230.81	1197.98	1225.15	950.815	147.823	535.038	530.163
RGMC.31982	d__Bacteria;p__Bacillota_A;c__Clostridia;o__Christensenellales;f__Aristaeellaceae;g__UBA2862;s__	156.465	317.163	263.032	329.206	402.584	342.776	297.783	371.823	187.034	342.52	504.009	480.707	436.637	391.061	366.988	0	299.306	302.912
RGMC.31994	d__Bacteria;p__Bacillota_A;c__Clostridia;o__Christensenellales;f__Aristaeellaceae;g__UBA2862;s__UBA2862 sp902765305	0	234.985	326.85	184.158	0	179.223	0	179.849	0	0	0	0	0	0	0	0	0	0
RGMC.32	d__Bacteria;p__Bacteroidota;c__Bacteroidia;o__Bacteroidales;f__Bacteroidaceae;g__UBA2918;s__UBA2918 sp017427065	1271.08	593.496	548.025	678.116	549.641	614.237	755.379	683.486	1135.78	438.41	397.072	476.596	520.763	523.516	526.156	1056.52	562.93	552.457
RGMC.32060	d__Bacteria;p__Bacillota_A;c__Clostridia;o__Christensenellales;f__Aristaeellaceae;g__UBA2862;s__UBA2862 sp017512905	0	0	267.159	0	0	0	0	0	0	0	0	0	0	0	0	0	0	0
RGMC.32091	d__Bacteria;p__Bacillota_A;c__Clostridia;o__Christensenellales;f__Aristaeellaceae;g__UBA2862;s__UBA2862 sp902765305	0	2635.66	3278.1	1943.4	0	1481.37	0	830.251	0	0	0	0	0	0	0	0	0	0
RGMC.32128	d__Archaea;p__Methanobacteriota;c__Methanobacteria;o__Methanobacteriales;f__Methanobacteriaceae;g__Methanobrevibacter_A;s__	0	0	0	0	0	127.61	0	0	0	0	0	0	0	0	0	0	0	0
RGMC.3233	d__Bacteria;p__Bacteroidota;c__Bacteroidia;o__Bacteroidales;f__Bacteroidaceae;g__Ga6A1;s__Ga6A1 sp900102385	224.068	0	0	0	0	0	229.912	0	227.631	0	0	0	0	0	0	208.239	0	0
RGMC.3236	d__Bacteria;p__Bacteroidota;c__Bacteroidia;o__Bacteroidales;f__Bacteroidaceae;g__Ga6A1;s__Ga6A1 sp900102385	0	0	0	0	0	0	201.831	0	221.426	0	0	0	0	0	0	0	0	0
RGMC.32481	d__Bacteria;p__Bacteroidota;c__Bacteroidia;o__Bacteroidales;f__Paludibacteraceae;g__UBA1723;s__UBA1723 sp002371265	1065.93	704.019	563.473	807.345	769.556	886.655	991.911	1011.63	1310.32	381.31	412.351	381.496	744.293	930.916	656.24	1273.38	672.384	668.369
RGMC.326	d__Bacteria;p__Synergistota;c__Synergistia;o__Synergistales;f__Aminobacteriaceae;g__JAFUYV01;s__JAFUYV01 sp016280565	894.81	571.554	651.072	461.932	407.176	441.192	479.499	464.616	656.396	691.388	435.787	441.83	417.799	427.958	391.683	719.44	573.553	562.239
RGMC.32769	d__Bacteria;p__Bacillota_A;c__Clostridia;o__Christensenellales;f__Aristaeellaceae;g__Aristaeella;s__Aristaeella sp946414315	0	0	0	0	0	0	0	260.958	0	396.223	380.501	404.735	0	0	298.48	0	0	0
RGMC.32967	d__Bacteria;p__Actinomycetota;c__Coriobacteriia;o__Coriobacteriales;f__Eggerthellaceae;g__UBA9715;s__UBA9715 sp902764575	0	205.584	205.448	262.739	271.206	264.773	0	242.552	0	0	399.516	0	0	0	0	0	0	0
RGMC.331	d__Bacteria;p__Bacteroidota;c__Bacteroidia;o__Bacteroidales;f__Bacteroidaceae;g__Ga6A1;s__Ga6A1 sp900102385	254.015	0	0	0	0	0	263.448	0	263.66	0	0	0	0	0	0	256.564	0	0
RGMC.33117	d__Bacteria;p__Bacteroidota;c__Bacteroidia;o__Bacteroidales;f__Paludibacteraceae;g__UBA1723;s__UBA1723 sp002392915	585.977	367.568	0	419.397	0	468.842	486.222	488.58	680.267	0	0	0	367.675	429.187	325.879	679.163	350.505	352.11
RGMC.33154	d__Bacteria;p__Spirochaetota;c__Spirochaetia;o__Treponematales;f__Treponemataceae;g__Treponema_D;s__Treponema_D sp946540605	585.057	417.905	429.691	409.777	418.567	500.249	395.174	497.685	765.429	0	0	0	203.287	253.232	228.795	606.183	238.878	234.793
RGMC.3354	d__Bacteria;p__Pseudomonadota;c__Gammaproteobacteria;o__Enterobacterales;f__Enterobacteriaceae;g__Escherichia;s__Escherichia coli	206.671	456.746	278.557	258.02	272.973	569.476	422.325	466.509	455.131	254.389	181.128	198.24	207.082	959.064	285.741	299.316	274.199	269.557
RGMC.33627	d__Archaea;p__Methanobacteriota;c__Methanobacteria;o__Methanobacteriales;f__Methanobacteriaceae;g__Methanosphaera;s__	0	0	0	0	457.677	0	0	0	0	585.075	635.296	903.612	956.36	767.435	808.325	0	0	0
RGMC.337	d__Bacteria;p__Bacteroidota;c__Bacteroidia;o__Bacteroidales;f__UBA4181;g__UBA4181;s__UBA4181 sp017523725	413.116	229.375	225.5	252.719	199.952	203.196	272.436	224.507	413.16	229.548	153.874	176.614	182.403	169.357	175.245	376.617	204.274	200.177
RGMC.3372	d__Bacteria;p__Bacillota_A;c__Clostridia;o__Oscillospirales;f__Oscillospiraceae;g__Limivicinus;s__Limivicinus sp900317375	0	306.849	302.18	382.927	366.164	305.667	299.362	274.264	0	533.014	543.312	545.85	440.902	444.035	421.671	255.313	410.046	408.825
RGMC.3378	d__Bacteria;p__Bacillota_A;c__Clostridia;o__Lachnospirales;f__Lachnospiraceae;g__UBA2868;s__UBA2868 sp900320345	0	514.192	833.762	0	0	0	0	0	0	0	0	0	0	0	0	0	0	0
RGMC.339	d__Bacteria;p__Spirochaetota;c__Spirochaetia;o__Treponematales;f__Treponemataceae;g__Treponema_D;s__Treponema_D sp002392405	363.947	302.263	221.423	351.456	387.282	326.762	384.645	295.392	582.554	0	153.969	0	248.91	286.682	216.093	525.788	242.557	250.71
RGMC.33905	d__Bacteria;p__Bacillota_A;c__Clostridia;o__Christensenellales;f__Aristaeellaceae;g__UBA2862;s__UBA2862 sp017432405	0	142.846	226.554	0	0	0	0	0	0	0	0	0	0	0	0	0	0	0
RGMC.34	d__Bacteria;p__Bacteroidota;c__Bacteroidia;o__Bacteroidales;f__WCHB1-69;g__UBA1756;s__UBA1756 sp016285085	0	0	0	0	0	0	0	0	0	0	163.484	0	271.596	214.494	250.389	0	0	0
RGMC.34023	d__Bacteria;p__Spirochaetota;c__Spirochaetia;o__Treponematales;f__Treponemataceae;g__Treponema_D;s__	387.086	243.946	216.305	219.278	249.22	230.327	291.415	315.249	322.223	311.322	316.682	353.189	617.093	565.377	536.102	384.353	375.951	375.01
RGMC.343	d__Bacteria;p__Bacillota_A;c__Clostridia;o__Lachnospirales;f__Lachnospiraceae;g__XBB1006;s__XBB1006 sp016283755	554.279	124.482	0	1254.54	798.98	963.89	2023.49	1074.75	754.142	0	0	164.497	263.676	318.753	204.53	1616.7	1293.43	1288.83
RGMC.34371	d__Bacteria;p__Bacteroidota;c__Bacteroidia;o__Bacteroidales;f__Paludibacteraceae;g__UBA1723;s__UBA1723 sp002371265	3326.43	2232.33	1735.42	2577.34	2486.18	2895.18	3199.6	3274.46	4206.06	1175.71	1305.6	1225.92	2400.48	3036.63	2147.9	3976.78	2110.66	2115.03
RGMC.344	d__Bacteria;p__Bacillota_A;c__Clostridia;o__Peptostreptococcales;f__Anaerovoracaceae;g__UBA3871;s__UBA3871 sp002392265	1440.02	910.595	452.323	1221.9	1298.01	1158.64	1983.14	1478.67	1366.67	2002.85	1151.69	1405.67	1919.21	2060.17	1276.09	1817.29	1806.32	1781.27
RGMC.34401	d__Bacteria;p__Pseudomonadota;c__Gammaproteobacteria;o__Enterobacterales;f__Succinivibrionaceae;g__Ruminobacter;s__Ruminobacter sp002309455	0	0	502.952	316.367	0	0	0	0	651.21	0	0	0	0	0	0	0	0	0
RGMC.345	d__Bacteria;p__Bacillota_A;c__Clostridia;o__Lachnospirales;f__Lachnospiraceae;g__RGIG3528;s__RGIG3528 sp016283775	0	0	0	0	0	0	237.981	0	0	0	0	0	307.266	0	217.753	0	200.703	202.739
RGMC.3459	d__Bacteria;p__Bacteroidota;c__Bacteroidia;o__Bacteroidales;f__Bacteroidaceae;g__UBA1179;s__UBA1179 sp017530735	546.646	381.554	518.222	259.002	170.803	300.962	319.295	347.006	559.791	312.196	145.913	124.905	200.2	233.17	185.125	522.359	198.697	200.363
RGMC.34617	d__Bacteria;p__Spirochaetota;c__Spirochaetia;o__Treponematales;f__Treponemataceae;g__Treponema_D;s__	0	0	0	0	0	0	0	0	0	0	156.284	0	0	0	0	0	0	0
RGMC.34651	d__Archaea;p__Methanobacteriota;c__Methanobacteria;o__Methanobacteriales;f__Methanobacteriaceae;g__Methanobrevibacter;s__Methanobrevibacter ruminantium_A	0	220.494	0	356.14	305.322	585.507	278.528	648.132	184.004	286.491	254.89	268.981	0	269.442	258.784	183.817	242.226	241.459
RGMC.3470	d__Bacteria;p__Bacteroidota;c__Bacteroidia;o__Bacteroidales;f__Bacteroidaceae;g__Ga6A1;s__Ga6A1 sp900102385	238.398	0	0	0	175.839	0	252.157	0	264.277	0	0	0	0	0	0	238.877	0	0
RGMC.3482	d__Bacteria;p__Bacillota_A;c__Clostridia;o__Lachnospirales;f__Lachnospiraceae;g__CAG-411;s__CAG-411 sp902795895	0	0	0	0	0	0	0	0	0	0	328.264	0	0	0	0	0	0	0
RGMC.34971	d__Bacteria;p__Spirochaetota;c__Spirochaetia;o__Treponematales;f__Treponemataceae;g__Treponema_D;s__Treponema_D sp902797305	278.803	141.197	150.139	0	0	157.155	176.024	221.348	280.785	0	0	0	0	0	0	229.843	122.845	125.187
RGMC.350	d__Bacteria;p__Verrucomicrobiota;c__Verrucomicrobiae;o__Limisphaerales;f__UBA1412;g__UBA1412;s__UBA1412 sp016283885	281.114	148.364	142.207	162.143	114.357	150.578	195.599	185.5	271.981	242.676	98.1124	0	151.056	162.595	104.245	281.011	135.69	135.253
RGMC.35026	d__Archaea;p__Methanobacteriota;c__Methanobacteria;o__Methanobacteriales;f__Methanobacteriaceae;g__Methanosphaera;s__	0	0	0	0	0	0	0	0	0	250.109	234.867	398.112	456.75	346.907	397.373	0	0	0
RGMC.3503	d__Bacteria;p__Bacteroidota;c__Bacteroidia;o__Bacteroidales;f__Bacteroidaceae;g__Ga6A1;s__Ga6A1 sp900102385	196.557	0	0	0	0	0	203.153	0	200.978	0	0	0	0	0	0	0	0	0
RGMC.35084	d__Bacteria;p__Spirochaetota;c__Spirochaetia;o__Treponematales;f__Treponemataceae;g__Treponema_D;s__Treponema_D sp902797305	192.598	0	0	0	0	0	0	126.5	190.413	0	0	0	0	0	0	165.011	0	0
RGMC.35086	d__Bacteria;p__Bacillota;c__Bacilli;o__Lactobacillales;f__Streptococcaceae;g__Streptococcus;s__Streptococcus equinus	0	0	0	0	0	0	0	0	0	220.636	0	0	0	0	0	0	0	0
RGMC.35141	d__Bacteria;p__Spirochaetota;c__Spirochaetia;o__Treponematales;f__Treponemataceae;g__UBA1240;s__UBA1240 sp001603145	116.071	0	0	0	0	134.195	0	0	118.723	150.414	0	0	125.553	140.946	111.214	166.62	0	101.668
RGMC.35164	d__Bacteria;p__Bacillota_I;c__Bacilli_A;o__Erysipelotrichales;f__Erysipelotrichaceae;g__Bulleidia;s__	0	683.896	0	1107.23	1310.66	1217.64	867.989	969.836	0	1928.82	1920.78	2263.84	1503.88	1443.52	1896.51	557.393	1243.48	1227.62
RGMC.3520	d__Bacteria;p__Bacillota_A;c__Clostridia;o__Lachnospirales;f__Lachnospiraceae;g__CAG-411;s__CAG-411 sp902795895	0	0	0	0	0	0	0	0	0	0	314.707	0	0	0	0	0	0	0
RGMC.35345	d__Bacteria;p__Spirochaetota;c__Spirochaetia;o__Treponematales;f__Treponemataceae;g__Treponema_D;s__Treponema_D sp004554075	2766.56	1900.55	1800.96	1918.73	1713.54	2247.56	1916.33	2281.6	3488.94	524.381	520.159	485.802	921.636	1352.97	911.711	2965.89	1357.17	1348.29
RGMC.355	d__Bacteria;p__Chloroflexota;c__Dehalococcoidia;o__Dehalococcoidales;f__UBA1222;g__UBA1222;s__UBA1222 sp016284035	180.459	0	0	155.691	190.488	132.571	314.1	162.178	198.984	0	0	0	207.349	248.28	179.893	253.718	172.346	169.033
RGMC.35729	d__Bacteria;p__Bacillota;c__Bacilli;o__Lactobacillales;f__Streptococcaceae;g__Streptococcus;s__Streptococcus equinus	0	0	0	0	0	0	0	0	0	193.225	0	0	0	0	0	0	0	0
RGMC.35753	d__Bacteria;p__Pseudomonadota;c__Gammaproteobacteria;o__Enterobacterales;f__Enterobacteriaceae;g__Escherichia;s__Escherichia coli	0	103.232	0	0	0	142.867	92.5347	93.6901	96.8955	0	0	0	0	185.861	0	0	0	0
RGMC.35755	d__Archaea;p__Methanobacteriota;c__Methanobacteria;o__Methanobacteriales;f__Methanobacteriaceae;g__Methanobrevibacter_A;s__	0	0	0	0	170.433	0	162.926	0	0	0	0	0	0	0	0	0	0	0
RGMC.35929	d__Bacteria;p__Bacteroidota;c__Bacteroidia;o__Bacteroidales;f__Paludibacteraceae;g__UBA1723;s__UBA1723 sp002392915	455.238	292.072	0	334.449	320.213	359.655	397.669	397.273	523.762	0	0	0	298.831	368.132	266.134	562.91	286.905	284.47
RGMC.35986	d__Bacteria;p__Bacillota_A;c__Clostridia;o__Oscillospirales;f__Oscillospiraceae;g__Limivicinus;s__Limivicinus sp900317375	1277.88	2484.07	2390.64	3203.67	3298.98	2615.04	2506.14	2425.38	1218.86	5127.27	4737.43	4897.04	3719.67	3829.99	3695.07	2025.07	3503.51	3452.46
RGMC.3605	d__Bacteria;p__Bacillota_A;c__Clostridia;o__Oscillospirales;f__Ruminococcaceae;g__Ruminiclostridium_E;s__Ruminiclostridium_E sp947168885	0	0	0	0	207.323	0	0	0	0	0	129.458	0	0	0	0	0	0	0
RGMC.36456	d__Bacteria;p__Bacteroidota;c__Bacteroidia;o__Bacteroidales;f__Bacteroidaceae;g__UBA1179;s__UBA1179 sp902782245	299.197	188.972	278.348	146.136	128.71	166.579	188.251	175.375	338.29	134.421	0	0	130.144	135.824	111.543	225.194	111.651	117.126
RGMC.36488	d__Archaea;p__Methanobacteriota;c__Methanobacteria;o__Methanobacteriales;f__Methanobacteriaceae;g__Methanobrevibacter;s__	0	0	0	143.335	225.482	181.717	173.81	172.947	0	0	0	0	0	0	0	0	114.376	113.613
RGMC.3654	d__Bacteria;p__Bacteroidota;c__Bacteroidia;o__Bacteroidales;f__Bacteroidaceae;g__Ga6A1;s__Ga6A1 sp900102385	0	0	0	0	0	0	212.207	0	181.617	0	0	0	0	0	0	0	0	0
RGMC.3666	d__Bacteria;p__Bacteroidota;c__Bacteroidia;o__Bacteroidales;f__UBA932;g__Cryptobacteroides;s__Cryptobacteroides sp900316955	423.989	251.509	224.106	275.281	240.05	236.345	250.481	232.156	318.906	284.422	276.531	276.46	259.223	267.177	256.918	339.321	234.983	235.346
RGMC.36690	d__Bacteria;p__Pseudomonadota;c__Gammaproteobacteria;o__Enterobacterales;f__Enterobacteriaceae;g__Escherichia;s__Escherichia coli	0	0	0	0	0	0	0	0	0	0	0	0	0	78.7282	0	0	0	0
RGMC.36740	d__Bacteria;p__Bacteroidota;c__Bacteroidia;o__Bacteroidales;f__UBA3824;g__UBA3824;s__UBA3824 sp017394445	1120.26	760.939	684.383	588.391	616.636	672.383	795.693	805.108	1305.36	575.44	251.001	0	492.321	452.613	340.122	849.73	561.905	563.976
RGMC.3676	d__Bacteria;p__Bacteroidota;c__Bacteroidia;o__Bacteroidales;f__Bacteroidaceae;g__Ga6A1;s__Ga6A1 sp900102385	173.469	0	0	0	0	0	194.312	0	178.123	0	0	0	0	0	0	0	0	0
RGMC.36830	d__Bacteria;p__Bacteroidota;c__Bacteroidia;o__Bacteroidales;f__Paludibacteraceae;g__UBA1723;s__	674.253	440.231	355.071	506.71	468.928	543.961	592.823	595.451	804.59	235.016	256.372	242.278	456.551	556.401	411.303	856.43	439.17	430.776
RGMC.3710	d__Bacteria;p__Bacteroidota;c__Bacteroidia;o__Bacteroidales;f__Bacteroidaceae;g__Ga6A1;s__Ga6A1 sp900102385	211.608	0	0	0	152.379	0	236.666	0	214.829	0	0	0	0	0	0	205.481	0	0
RGMC.3725	d__Bacteria;p__Bacteroidota;c__Bacteroidia;o__Bacteroidales;f__Bacteroidaceae;g__Ga6A1;s__Ga6A1 sp900102385	250.468	0	0	0	177.043	0	260.195	0	257.327	0	0	0	0	0	0	239.546	0	0
RGMC.37261	d__Bacteria;p__Bacillota_A;c__Clostridia;o__Peptostreptococcales;f__Anaerovoracaceae;g__Eubacterium_T;s__Eubacterium_T sp900318155	0	102.628	0	105.333	127.357	85.4232	147.204	99.1726	0	0	98.1921	306.618	258.17	98.8099	181.648	105.084	302.279	291.673
RGMC.37267	d__Bacteria;p__Bacillota_A;c__Clostridia;o__Peptostreptococcales;f__Anaerovoracaceae;g__RGIG7041;s__RGIG7041 sp017543805	882.55	609.541	429.171	604.55	481.518	526.017	545.948	554.333	697.273	361.518	358.769	360.273	305.682	362.667	353.673	736.359	583.707	571.654
RGMC.37275	d__Bacteria;p__Bacillota_A;c__Clostridia;o__Oscillospirales;f__Oscillospiraceae;g__Limivicinus;s__Limivicinus sp900317375	0	377.406	365.839	535.805	546.671	394.879	412.818	363.728	0	921.038	771.709	796.875	624.66	650.705	602.864	321.883	529.164	531.485
RGMC.37276	d__Bacteria;p__Bacillota_A;c__Clostridia;o__Lachnospirales;f__Lachnospiraceae;g__Eubacterium_Q;s__Eubacterium_Q sp900321215	155.953	221.938	238.541	175.043	186.279	174.943	164.383	182.061	188.067	0	0	0	0	0	0	0	0	0
RGMC.37285	d__Bacteria;p__Desulfobacterota;c__Desulfovibrionia;o__Desulfovibrionales;f__Desulfovibrionaceae;g__Desulfovibrio;s__Desulfovibrio sp002369295	0	198.451	0	0	0	273.594	255.029	410.243	0	0	0	0	0	0	0	0	0	0
RGMC.37288	d__Bacteria;p__Planctomycetota;c__Planctomycetia;o__Pirellulales;f__Thermoguttaceae;g__RGIG3701;s__	0	0	0	0	345.305	0	205.144	0	0	293.665	514.274	523.034	552.391	589.359	528.048	0	0	0
RGMC.373	d__Bacteria;p__Bacillota_A;c__Clostridia;o__Lachnospirales;f__Lachnospiraceae;g__UBA1258;s__UBA1258 sp024687305	587.491	670.037	718.614	510.278	365.311	636.089	436.747	718.16	722.066	0	0	0	0	0	0	561.224	301.396	300.266
RGMC.37331	d__Bacteria;p__Bacillota_A;c__Clostridia;o__Oscillospirales;f__Oscillospiraceae;g__Limivicinus;s__Limivicinus sp900317375	0	510.108	435.08	646.193	655.833	508.623	504.679	448.942	0	1027.91	899.559	920.659	694.031	737.401	679.805	416.4	675.027	676.212
RGMC.37354	d__Bacteria;p__Bacillota_A;c__Clostridia;o__Oscillospirales;f__Oscillospiraceae;g__Limivicinus;s__Limivicinus sp900317375	0	254.806	238.112	325.539	318.834	270.322	277.225	275.798	0	358.762	471.474	442.219	431.817	503.168	340.524	254.647	347.566	338.502
RGMC.37355	d__Bacteria;p__Bacteroidota;c__Bacteroidia;o__Bacteroidales;f__Bacteroidaceae;g__UBA4372;s__	527.581	391.018	486.253	263.949	198.412	388.778	311.151	175.856	528.569	264.813	175.566	174.185	347.468	254.501	324.763	559.305	286.274	276.975
RGMC.37368	d__Bacteria;p__Bacteroidota;c__Bacteroidia;o__Bacteroidales;f__UBA932;g__Cryptobacteroides;s__Cryptobacteroides sp017438265	192.109	0	0	0	0	0	0	0	180.79	0	0	0	0	0	0	0	0	0
RGMC.37374	d__Bacteria;p__Pseudomonadota;c__Gammaproteobacteria;o__Xanthomonadales;f__Xanthomonadaceae;g__Xanthomonas_A;s__Xanthomonas_A translucens	1083.8	714.707	766.003	1023.04	926.261	903.167	1368.51	1752.7	1750.57	1060.49	824.293	833.327	941.605	3549.35	1188.11	1669.62	1412.04	1392.9
RGMC.37376	d__Bacteria;p__Bacillota_A;c__Clostridia;o__Oscillospirales;f__Oscillospiraceae;g__Limivicinus;s__Limivicinus sp900317375	0	282.054	292.933	387.227	390.285	298.524	293.384	268.067	0	754.128	590.392	622.239	500.042	475.51	469.597	241.666	397.793	390.494
RGMC.37393	d__Bacteria;p__Verrucomicrobiota;c__Verrucomicrobiae;o__Limisphaerales;f__UBA1412;g__UBA1412;s__UBA1412 sp016283885	235.692	120.288	131.007	128.958	0	127.832	164.504	164.052	225.922	202.645	0	0	133.928	138.679	0	241.655	120.851	117.805
RGMC.37400	d__Bacteria;p__Spirochaetota;c__Spirochaetia;o__Sphaerochaetales;f__Sphaerochaetaceae;g__UBA9732;s__UBA9732 sp900321635	944.333	608.86	949.664	956.872	516.977	715.229	1194.99	880.423	1474.62	375.759	189.81	249.643	318.967	294.864	285.473	1317.3	772.789	784.406
RGMC.37407	d__Bacteria;p__Bacteroidota;c__Bacteroidia;o__Bacteroidales;f__UBA932;g__Cryptobacteroides;s__Cryptobacteroides sp017438265	119.417	0	0	0	0	0	0	0	0	0	0	0	0	0	0	0	0	0
RGMC.37408	d__Bacteria;p__Bacillota_A;c__Clostridia;o__Oscillospirales;f__Oscillospiraceae;g__Evtepia;s__	546.193	1132.25	1397.35	1210.58	1545.56	939.68	1214.82	1072.07	0	3096.7	2188.86	2187.01	1831.13	1791.37	1366.37	783.949	1470.86	1463.07
RGMC.37413	d__Bacteria;p__Desulfobacterota;c__Desulfovibrionia;o__Desulfovibrionales;f__Desulfovibrionaceae;g__Desulfovibrio;s__Desulfovibrio sp002369295	0	177.602	0	0	0	194.548	216.252	254.317	0	0	0	0	0	0	0	0	0	0
RGMC.37426	d__Bacteria;p__Bacillota_A;c__Clostridia;o__Oscillospirales;f__Oscillospiraceae;g__Limivicinus;s__Limivicinus sp900317375	0	410.302	401.034	539.526	505.697	416.706	391.775	333.644	0	834.887	764.146	779.64	605.23	570.007	586.666	361.111	565.576	553.204
RGMC.37441	d__Bacteria;p__Bacillota_A;c__Clostridia;o__Christensenellales;f__Aristaeellaceae;g__RUG563;s__	605.585	702.821	717.673	642.194	773.412	604.361	617.333	587.468	506.837	831.904	977.492	902.043	732.852	716.923	716.671	577.835	621.013	613.413
RGMC.37446	d__Bacteria;p__Bacillota_A;c__Clostridia;o__Lachnospirales;f__Lachnospiraceae;g__UBA2912;s__UBA2912 sp902796775	0	840.394	617.543	876.016	870.022	969.299	751.833	911.829	377.25	1353.57	1245.11	1381.46	1054.07	1043.7	1205.99	559.439	1068.4	1063.37
RGMC.37450	d__Bacteria;p__Bacillota_A;c__Clostridia;o__Peptostreptococcales;f__Anaerovoracaceae;g__RUG099;s__	0	0	0	0	0	0	0	0	0	0	145.063	0	153.001	179.642	131.766	0	0	147.327
RGMC.37458	d__Bacteria;p__Bacillota_A;c__Clostridia;o__Christensenellales;f__Aristaeellaceae;g__RUG563;s__	1663.65	1191.09	881.4	1651.65	2284.79	1472.38	1657.94	1105.61	1881.35	2660.8	2170.99	2378.42	1765.5	1598.35	2134.21	1682.46	1733.18	1632.38
RGMC.37470	d__Bacteria;p__Bacillota_A;c__Clostridia;o__Lachnospirales;f__Lachnospiraceae;g__UBA2912;s__	0	627.704	953.167	374.111	315.678	503.171	266.082	541.118	0	665.241	496.273	554.34	389.45	414.994	431.978	0	402.995	403.583
RGMC.37496	d__Bacteria;p__Spirochaetota;c__Spirochaetia;o__Sphaerochaetales;f__Sphaerochaetaceae;g__UBA9732;s__UBA9732 sp902796335	960.352	379.161	0	664.245	702.05	420.888	1306.52	570.701	739.921	594.624	519.345	666.232	953.124	879.547	708.413	1815.81	970.09	963.271
RGMC.37503	d__Bacteria;p__Spirochaetota;c__Spirochaetia;o__Sphaerochaetales;f__Sphaerochaetaceae;g__UBA9732;s__UBA9732 sp902796335	230.451	139.495	0	509.336	505.004	335.129	915.212	299.717	539.144	386.276	293.193	348.615	563.426	488.982	525.771	612.482	426.114	415.442
RGMC.37505	d__Bacteria;p__Verrucomicrobiota;c__Verrucomicrobiae;o__Limisphaerales;f__UBA1412;g__UBA1412;s__UBA1412 sp016283885	229.213	118.788	117.426	127.877	0	125.127	163.409	164.332	224.23	202.176	0	0	124.23	130.884	84.4226	231.14	111.337	113.625
RGMC.37507	d__Bacteria;p__Bacillota_A;c__Clostridia;o__Christensenellales;f__Aristaeellaceae;g__UBA2862;s__	0	946.444	518.186	1638.06	1707.12	1206.21	954.496	871.298	805.755	1075.57	1768.96	2230.75	1760.79	987.381	1723.65	0	1230.74	1222.47
RGMC.37510	d__Bacteria;p__Bacillota_A;c__Clostridia;o__Christensenellales;f__Aristaeellaceae;g__RUG563;s__	1353.08	1179.85	1079.39	1409.84	1750.77	1238.82	1364.61	1042.25	1267.11	2090.15	1985.09	2117.18	1492.45	1374.84	1636.26	1582.28	1684.23	1671.11
RGMC.37513	d__Bacteria;p__UBA3054;c__UBA3054;o__UBA3054;f__UBA3054;g__UBA3054;s__UBA3054 sp002366995	835.585	397.411	232.677	623.413	779.96	518.683	1084.58	723.07	846.994	1067.23	863.197	852.091	1156.78	1338.88	954.78	907.863	676.798	657.991
RGMC.37518	d__Bacteria;p__Bacteroidota;c__Bacteroidia;o__Bacteroidales;f__F082;g__Limimorpha;s__Limimorpha sp001603665	0	0	0	0	251.704	0	289.882	0	0	707.667	459.419	442.706	672.566	894.542	569.969	0	0	0
RGMC.37536	d__Bacteria;p__Bacillota_A;c__Clostridia;o__Oscillospirales;f__CAG-272;g__UBA1248;s__	151.424	145.486	201.966	172.36	148.874	174.289	200.691	194.7	125.463	107.347	92.4427	0	0	0	74.0616	163.084	169.544	163.481
RGMC.37544	d__Bacteria;p__Actinomycetota;c__Coriobacteriia;o__Coriobacteriales;f__Eggerthellaceae;g__UBA9715;s__UBA9715 sp015062685	0	0	1696.34	0	0	0	0	0	0	0	0	0	0	0	0	0	0	0
RGMC.37545	d__Bacteria;p__Verrucomicrobiota;c__Verrucomicrobiae;o__Limisphaerales;f__UBA1412;g__UBA1412;s__UBA1412 sp016283885	303.134	159.19	156.082	171.9	128.488	165.208	211.53	207.684	290.599	280.001	0	0	174.658	175.784	116.115	316.02	151.2	148.931
RGMC.3756	d__Bacteria;p__Bacteroidota;c__Bacteroidia;o__Bacteroidales;f__UBA932;g__Bact-11;s__Bact-11 sp016284265	0	0	0	0	0	0	0	0	0	0	0	0	0	0	0	0	0	178.025
RGMC.37587	d__Bacteria;p__Actinomycetota;c__Coriobacteriia;o__Coriobacteriales;f__Eggerthellaceae;g__UBA9715;s__UBA9715 sp015062685	0	0	467.06	0	0	0	0	0	0	0	0	0	0	0	0	0	0	0
RGMC.37590	d__Bacteria;p__Bacillota_A;c__Clostridia;o__Christensenellales;f__Christensenellaceae;g__QANA01;s__QANA01 sp017439085	481.834	350.578	130.495	324.476	347.29	334.248	446.126	439.416	408.497	285.915	312.743	349.162	379.76	380.393	336.487	404.659	361.221	364.449
RGMC.37622	d__Bacteria;p__Desulfobacterota;c__Desulfovibrionia;o__Desulfovibrionales;f__Desulfovibrionaceae;g__Desulfovibrio;s__Desulfovibrio sp002369295	0	447.158	0	0	0	364.027	427.85	363.06	0	0	0	0	0	0	0	0	0	0
RGMC.37624	d__Bacteria;p__Spirochaetota;c__Spirochaetia;o__Sphaerochaetales;f__Sphaerochaetaceae;g__UBA9732;s__UBA9732 sp900321635	1404.22	909.639	1485.98	1403.23	766.024	1075.71	1765.49	1352.16	2285.74	486.366	274.606	343.796	460.98	429.225	402.521	1921.43	1144.93	1134.86
RGMC.37639	d__Bacteria;p__Bacteroidota;c__Kapaibacteriia;o__Kapaibacteriales;f__UBA2268;g__JAAYTD01;s__JAAYTD01 sp017428585	815.6	499.217	165.06	488.491	303.596	655.122	771.526	865.9	883.606	0	0	0	119.999	168.287	105.893	897.702	430.092	423.601
RGMC.37647	d__Bacteria;p__Bacteroidota;c__Bacteroidia;o__Bacteroidales;f__F082;g__Limimorpha;s__Limimorpha sp900315175	203.359	0	0	0	0	0	237.38	293.284	345.539	0	0	0	0	0	0	265.846	0	0
RGMC.37659	d__Bacteria;p__Bacteroidota;c__Bacteroidia;o__Bacteroidales;f__P3;g__UBA1217;s__UBA1217 sp902788805	311.691	205.796	159.181	0	0	231.131	0	159.99	338.585	0	0	0	0	0	0	227.276	0	0
RGMC.37668	d__Bacteria;p__Bacteroidota;c__Bacteroidia;o__Bacteroidales;f__UBA932;g__Bact-11;s__Bact-11 sp002361615	0	0	0	0	0	0	232.767	200.464	0	432.794	270.062	269.627	262.915	280.916	241.575	0	230.013	223.819
RGMC.37683	d__Bacteria;p__Bacillota_A;c__Clostridia;o__Oscillospirales;f__CAG-272;g__UBA1248;s__	228.428	229.324	313.555	260.43	233.132	279.553	295.381	297.893	194.902	226.254	154.311	0	132.518	155.138	124.411	251.782	275.132	280.697
RGMC.37691	d__Bacteria;p__Pseudomonadota;c__Gammaproteobacteria;o__Enterobacterales;f__Succinivibrionaceae;g__Ruminobacter;s__Ruminobacter amylophilus	0	0	0	0	0	0	0	0	144.987	0	0	0	0	0	0	0	0	0
RGMC.37702	d__Bacteria;p__Bacillota_A;c__Clostridia;o__Peptostreptococcales;f__Anaerovoracaceae;g__Lentihominibacter;s__	1549.49	2628.3	2785.86	2693.03	2532.07	2563.27	2622.04	2947.29	1132.05	9054.33	5719.36	5917.38	5923.78	6255.23	4698.07	2777.46	5240.53	5193.29
RGMC.37705	d__Bacteria;p__Bacillota_A;c__Clostridia;o__Oscillospirales;f__Oscillospiraceae;g__Limivicinus;s__Limivicinus sp900317375	0	268.944	256.166	326.274	325.5	281.297	257.977	261.811	0	455.926	471.845	469.521	342.828	386.615	343.22	204.173	358.096	353.33
RGMC.37712	d__Bacteria;p__Spirochaetota;c__Spirochaetia;o__Sphaerochaetales;f__Sphaerochaetaceae;g__UBA9732;s__UBA9732 sp900321635	1148.26	759.454	1145.82	1172.69	640.117	889.887	1461.58	1070.11	1872.4	449.72	236.035	299.331	389.09	348.147	339.327	1627.07	963.461	953.379
RGMC.37713	d__Bacteria;p__Bacteroidota;c__Bacteroidia;o__Bacteroidales;f__UBA932;g__Cryptobacteroides;s__Cryptobacteroides sp902787255	0	0	0	0	0	0	0	0	0	0	166.694	210.78	328.075	269.108	337.189	0	0	0
RGMC.37724	d__Bacteria;p__Bacillota_A;c__Clostridia;o__Oscillospirales;f__Oscillospiraceae;g__Limivicinus;s__Limivicinus sp900317375	0	340.665	335.537	473.428	494.268	360.227	360.955	329.216	0	796.868	678.978	708.033	533.497	577.55	519.043	274.026	484.558	474.598
RGMC.37742	d__Bacteria;p__Bacteroidota;c__Bacteroidia;o__Bacteroidales;f__Paludibacteraceae;g__RF16;s__RF16 sp902769535	274.451	157.303	153.858	0	0	127.955	0	153.954	265.076	0	0	0	0	0	0	235.829	0	0
RGMC.37743	d__Bacteria;p__Bacteroidota;c__Bacteroidia;o__Bacteroidales;f__UBA932;g__Cryptobacteroides;s__	631.792	406.959	432.051	470.752	360.983	421.001	436.989	380.865	630.693	498.917	255.393	267.638	312.068	268.881	290.858	611.725	389.337	380.184
RGMC.37751	d__Bacteria;p__Bacteroidota;c__Bacteroidia;o__Bacteroidales;f__Bacteroidaceae;g__Ga6A1;s__Ga6A1 sp900102385	0	0	0	0	0	0	296.639	0	0	0	0	0	0	0	0	0	0	0
RGMC.37754	d__Bacteria;p__Bacillota_I;c__Bacilli_A;o__RFN20;f__CAG-826;g__RUG14515;s__	559.775	0	0	458.18	568.272	394.058	742.551	469.89	676.992	609.174	452.916	443.541	693.695	775.939	646.764	645.072	422.421	422.683
RGMC.37782	d__Bacteria;p__Bacteroidota;c__Bacteroidia;o__Bacteroidales;f__Bacteroidaceae;g__Prevotella;s__Prevotella sp902801155	250.904	172.489	0	199.595	212.021	265.769	293.667	222.304	306.289	0	0	0	230.349	0	216.396	427.575	253.731	252.201
RGMC.37848	d__Bacteria;p__Bacillota_A;c__Clostridia;o__Peptostreptococcales;f__Anaerovoracaceae;g__Lentihominibacter;s__	0	589.285	425.424	538.118	533.082	605.993	496.839	679.662	0	1038.03	1054.29	1110.78	806.862	901.866	875.581	402.711	803.672	800.577
RGMC.37882	d__Bacteria;p__Bacillota_A;c__Clostridia;o__Christensenellales;f__Aristaeellaceae;g__Aristaeella;s__	1029.54	2083.48	2086.35	2430.69	2513.23	2364.13	1587.29	2078.57	1366.18	2423.83	2598.64	3003.22	1740.16	1595.46	2127.09	1230.89	1840.01	1836.28
RGMC.37900	d__Bacteria;p__Bacillota_A;c__Clostridia;o__Lachnospirales;f__Lachnospiraceae;g__CAG-411;s__CAG-411 sp902795895	0	0	0	0	0	0	0	0	0	0	374.343	0	0	0	0	0	0	0
RGMC.37915	d__Bacteria;p__Bacillota_A;c__Clostridia;o__Peptostreptococcales;f__Anaerovoracaceae;g__Lentihominibacter;s__Lentihominibacter sp902763505	0	315.82	0	345.371	364.613	374.379	343.766	437.528	0	704.283	623.005	686.418	556.916	597.424	538.568	0	502.221	502.588
RGMC.37929	d__Bacteria;p__Bacillota_A;c__Clostridia;o__Peptostreptococcales;f__Anaerovoracaceae;g__RUG099;s__	0	0	0	0	0	0	0	0	0	0	187.189	0	0	0	159.678	0	0	0
RGMC.37975	d__Bacteria;p__Bacillota_A;c__Clostridia;o__Oscillospirales;f__Oscillospiraceae;g__UBA1774;s__UBA1774 sp902795345	0	0	0	185.828	200.854	149.235	0	153.806	0	256.682	230.1	250.952	188.669	206.827	200.299	0	171.249	170.708
RGMC.37978	d__Bacteria;p__Bacillota_A;c__Clostridia;o__Oscillospirales;f__Oscillospiraceae;g__UBA1774;s__UBA1774 sp902795345	0	0	0	230.439	238.778	188.88	0	193.554	0	320.976	263.824	282.162	219.865	249.394	233.215	0	220.004	218.362
RGMC.37988	d__Bacteria;p__Bacillota_A;c__Clostridia;o__Lachnospirales;f__Lachnospiraceae;g__UBA2868;s__	2645.75	11597.8	15861.9	6672.98	6987.2	4734.82	3340.74	1925.29	2498.19	5835.26	10016.4	11804.7	4417.48	2737.58	7883.3	4382.5	8721.19	8431.68
RGMC.37990	d__Bacteria;p__Bacillota_A;c__Clostridia;o__Saccharofermentanales;f__Saccharofermentanaceae;g__Saccharofermentans;s__Saccharofermentans sp016292215	0	0	0	241.365	349.811	203.316	292.1	0	0	867.22	543.955	541.293	371.027	430.306	412.419	0	328.833	322.496
RGMC.37992	d__Bacteria;p__Verrucomicrobiota;c__Lentisphaeria;o__Victivallales;f__UBA1829;g__UBA1732;s__UBA1732 sp017540385	0	0	0	0	0	0	0	0	0	155.612	0	0	147.591	123.273	102.249	0	0	0
RGMC.38012	d__Bacteria;p__Bacillota_A;c__Clostridia;o__Oscillospirales;f__Oscillospiraceae;g__UBA1774;s__UBA1774 sp902795345	0	0	0	177.025	182.159	138.312	0	137.543	0	257.029	223.653	232.034	175.166	187.576	190.524	0	167.519	168.279
RGMC.38014	d__Bacteria;p__Bacillota_A;c__Clostridia;o__Oscillospirales;f__Oscillospiraceae;g__UBA1774;s__UBA1774 sp902795345	0	0	0	198.279	213.689	166.588	177.042	166.133	0	275.699	235.717	254.666	198.268	217.69	208.189	0	193.175	191.061
RGMC.38038	d__Bacteria;p__Bacillota_A;c__Clostridia;o__Oscillospirales;f__Oscillospiraceae;g__Limivicinus;s__Limivicinus sp900317375	0	354.099	355.486	487.108	503.58	384.945	385.841	360.16	0	895.825	728.726	765.032	571.018	617.397	559.895	300.05	542.053	541.634
RGMC.38039	d__Archaea;p__Thermoplasmatota;c__Thermoplasmata;o__Methanomassiliicoccales;f__Methanomethylophilaceae;g__;s__	0	2183.43	0	0	0	0	1442.62	1657.13	2203.09	539.032	0	0	913.918	0	0	0	0	0
RGMC.38056	d__Bacteria;p__Bacillota_A;c__Clostridia;o__Peptostreptococcales;f__Anaerovoracaceae;g__RUG099;s__	0	0	0	0	0	0	0	0	0	289.856	212.254	246.395	188.13	181.654	204.133	0	143.719	132.137
RGMC.38072	d__Bacteria;p__Bacteroidota;c__Bacteroidia;o__Bacteroidales;f__ML635J-15;g__Bact-19;s__	0	0	0	0	0	0	0	0	0	0	0	0	481.478	544.225	427.251	0	0	0
RGMC.38089	d__Bacteria;p__Fibrobacterota;c__Fibrobacteria;o__Fibrobacterales;f__Fibrobacteraceae;g__Fibrobacter;s__	1447.95	858.286	740.396	849.69	822.824	891.7	890.526	810.453	1610.99	0	227.393	239.069	349.597	369.845	320.893	1230.51	597.98	596.566
RGMC.38120	d__Bacteria;p__Spirochaetota;c__Spirochaetia;o__Treponematales;f__Treponemataceae;g__Treponema_D;s__	1461.89	879.91	659.488	1140.62	1307.94	975.764	1550.3	970.205	1665.95	2719.01	1317.07	1460.66	2018.48	2247.64	2089.81	1684.35	1121.16	1108.46
RGMC.38129	d__Bacteria;p__Bacillota_A;c__Clostridia;o__Christensenellales;f__Aristaeellaceae;g__UBA2862;s__UBA2862 sp902790525	3249.45	6839.86	11238.9	5068.8	2762.32	3767.19	1709.12	2134.89	3039.03	0	2805.03	3276.45	1895.86	1150.81	2695.66	3448.16	3954.96	3841.08
RGMC.3818	d__Bacteria;p__Pseudomonadota;c__Gammaproteobacteria;o__Enterobacterales;f__Succinivibrionaceae;g__Ruminobacter;s__Ruminobacter amylophilus	188.396	145.299	190.846	177.041	160.64	129.875	203.561	164.084	334.368	0	0	0	0	0	0	233.357	0	0
RGMC.38189	d__Bacteria;p__Bacteroidota;c__Bacteroidia;o__Bacteroidales;f__Bacteroidaceae;g__Prevotella;s__	173.341	0	0	120.035	127.57	114.014	171.316	104.512	183.614	0	0	0	0	0	0	170.918	0	0
RGMC.3819	d__Bacteria;p__Bacteroidota;c__Bacteroidia;o__Bacteroidales;f__Bacteroidaceae;g__Ga6A1;s__Ga6A1 sp900102385	0	0	0	0	0	0	198.533	0	0	0	0	0	0	0	0	0	0	0
RGMC.38191	d__Bacteria;p__Bacteroidota;c__Bacteroidia;o__Bacteroidales;f__UBA932;g__Cryptobacteroides;s__Cryptobacteroides sp900318015	1041.63	416.818	429.778	435.207	368.597	349.778	601.752	563.94	480.895	600.533	659.781	682.278	703.765	793.315	498.506	1654.52	689.268	670.54
RGMC.38214	d__Bacteria;p__Bacillota_A;c__Clostridia;o__Lachnospirales;f__Lachnospiraceae;g__CAG-791;s__	719.684	2434.68	2517.95	2291.39	2605.18	2904.64	1448.38	3256.38	1013.61	1958.39	2242.93	3763.59	3567.9	4546.78	3684.12	959.058	2613.66	2549.02
RGMC.38228	d__Bacteria;p__Bacillota_I;c__Bacilli_A;o__RFN20;f__CAG-826;g__RUG13091;s__	580.055	247.675	0	866.932	978.609	631.44	1254.67	666.597	882.722	716.523	548.156	639.145	973.36	1058.95	805.326	1092.41	740.649	714.225
RGMC.38329	d__Bacteria;p__Fibrobacterota;c__Fibrobacteria;o__Fibrobacterales;f__Fibrobacteraceae;g__Fibrobacter;s__Fibrobacter sp001603905	0	0	0	0	0	0	0	0	0	0	0	0	0	177.49	0	0	0	0
RGMC.38348	d__Bacteria;p__Spirochaetota;c__Spirochaetia;o__CADAEX01;f__CADAEX01;g__CADAEX01;s__CADAEX01 sp902787125	0	0	0	0	0	0	179.11	0	0	0	0	0	0	0	0	0	0	0
RGMC.38354	d__Bacteria;p__Bacillota_A;c__Clostridia;o__Oscillospirales;f__Oscillospiraceae;g__Limivicinus;s__	211.346	415.227	256.353	479.603	459.797	523.665	427.219	532.929	227.392	387.664	525.339	493.053	381.938	446.623	407.192	317.776	441.33	444.497
RGMC.3836	d__Bacteria;p__Bacillota_A;c__Clostridia;o__Christensenellales;f__Christensenellaceae;g__QANA01;s__QANA01 sp017439085	652.897	437.803	152.591	426.294	472.565	430.066	627.885	624.581	554.01	373.058	408.656	459.022	493.37	512.022	438.012	567.37	469.922	473.397
RGMC.38361	d__Bacteria;p__Bacillota_A;c__Clostridia;o__Christensenellales;f__CAG-917;g__RGIG8124;s__	0	0	0	0	0	0	0	0	244.837	0	0	0	0	0	0	286.822	0	0
RGMC.38390	d__Bacteria;p__Bacillota_I;c__Bacilli_A;o__RFN20;f__CAG-826;g__RUG14515;s__RUG14515 sp902782395	2541.52	1554.82	875.07	2257.81	1950.83	2619.64	2932.88	2932.43	3536.85	1066.98	665.879	710.544	1498.21	1564.66	1240.73	3373.77	1741.71	1754.16
RGMC.384	d__Bacteria;p__Spirochaetota;c__Spirochaetia;o__Treponematales;f__Treponemataceae;g__Treponema_D;s__Treponema_D sp947165795	1813.85	1391.01	950.213	1197.21	784.626	1718.92	1221.97	1941.6	2441.33	0	142.473	0	264.054	316.782	289.389	2280.31	718.591	701.971
RGMC.38415	d__Bacteria;p__Bacteroidota;c__Bacteroidia;o__Bacteroidales;f__Paludibacteraceae;g__UBA1181;s__UBA1181 sp002310215	1176.01	669.205	516.944	747.347	629.179	664.632	911.361	699.509	928.135	2738.88	740.38	832.44	941.891	1110.31	853.073	1146.37	925.899	924.702
RGMC.38426	d__Bacteria;p__Bacteroidota;c__Bacteroidia;o__Bacteroidales;f__WCHB1-69;g__F23-D06;s__	7083.97	4327.7	3813.56	3125.48	1587.61	3865.1	1983.79	4244.86	5408.08	1162.37	1183.37	1307	1259.41	1237.3	1287.74	4853.63	2439.59	2424.32
RGMC.38436	d__Bacteria;p__Bacillota_A;c__Clostridia;o__Christensenellales;f__Aristaeellaceae;g__Aristaeella;s__	0	1390.38	1881.98	1805.58	1883.66	1623.84	924.976	927.319	0	2265.54	2044.41	2448.12	1280.08	1073.5	1841.17	0	1758.88	1745.29
RGMC.38456	d__Bacteria;p__Bacteroidota;c__Bacteroidia;o__Bacteroidales;f__Bacteroidaceae;g__UBA1179;s__UBA1179 sp902782245	462.657	290.575	424.808	209.248	178.988	237.645	256.556	236.547	545.958	181.109	0	0	164.999	168.16	149.211	341.46	177.133	173.575
RGMC.38463	d__Bacteria;p__Bacteroidota;c__Bacteroidia;o__Bacteroidales;f__F082;g__Limimorpha;s__Limimorpha sp902774295	661.398	267.389	0	578.386	364.051	613.636	667.289	788.882	1092.01	0	0	0	216.96	215.005	188.826	829.58	390.448	377.684
RGMC.38500	d__Bacteria;p__Bacteroidota;c__Bacteroidia;o__Bacteroidales;f__F082;g__Limimorpha;s__Limimorpha sp902774295	648.811	265.723	0	538.423	325.883	582.82	683.202	812.308	1007.47	200.4	0	0	235.411	286.892	169.885	891.79	381.784	400.243
RGMC.38509	d__Bacteria;p__Spirochaetota;c__Spirochaetia;o__CADAEX01;f__CADAEX01;g__CADAEX01;s__CADAEX01 sp902787125	0	0	0	0	0	0	143.427	0	0	0	0	0	0	0	0	0	0	0
RGMC.38519	d__Bacteria;p__Bacillota_A;c__Clostridia;o__Christensenellales;f__CAG-917;g__RGIG8124;s__	0	0	0	0	0	0	0	0	291.957	0	0	0	0	0	0	0	0	0
RGMC.38524	d__Bacteria;p__Bacteroidota;c__Bacteroidia;o__Bacteroidales;f__F082;g__Limimorpha;s__Limimorpha sp902774295	552.339	225.944	0	509.185	335.949	525.987	613.378	674.014	895.643	0	0	0	0	0	0	735.445	362.553	365.882
RGMC.38540	d__Bacteria;p__Bacillota_A;c__Clostridia;o__Oscillospirales;f__Oscillospiraceae;g__Limivicinus;s__	559.077	1023.39	563.811	982.19	805.11	960.133	614.885	758.279	485.37	1035.35	1215.75	1286.45	823.107	814.818	1047.42	668.973	888.231	870.402
RGMC.3855	d__Bacteria;p__Bacillota_A;c__Clostridia;o__Oscillospirales;f__Oscillospiraceae;g__RGIG8048;s__RGIG8048 sp947306975	0	0	0	0	0	0	0	0	0	0	165.213	0	0	0	140.317	0	0	0
RGMC.38550	d__Bacteria;p__Bacteroidota;c__Bacteroidia;o__Bacteroidales;f__Paludibacteraceae;g__RF16;s__RF16 sp902769535	223.234	129.044	0	0	0	0	0	122.828	210.739	0	0	0	0	0	0	190.4	0	0
RGMC.38552	d__Bacteria;p__Spirochaetota;c__Spirochaetia;o__Treponematales;f__Treponemataceae;g__Treponema_D;s__	1012.44	636.317	660.606	700.44	660.715	833.879	839.351	854.386	1237.74	203.864	205.046	223.064	408.878	506.855	399.986	1270.47	541.534	539.21
RGMC.3857	d__Bacteria;p__Bacillota_A;c__Clostridia;o__Lachnospirales;f__Lachnospiraceae;g__RGIG5021;s__	0	0	217.791	0	0	0	0	0	0	189.172	0	0	0	0	0	0	0	0
RGMC.38570	d__Bacteria;p__Bacillota_A;c__Clostridia;o__Oscillospirales;f__Oscillospiraceae;g__Faecousia;s__Faecousia sp015068455	0	0	0	0	0	125.747	0	128.702	0	252.001	243.191	223.457	210.144	199.755	181.705	0	125.768	126.208
RGMC.38596	d__Bacteria;p__Bacillota_A;c__Clostridia;o__Christensenellales;f__CAG-917;g__RGIG8124;s__	0	0	0	0	0	0	162.064	0	174.936	0	0	0	136.745	141.13	117.577	266.906	0	0
RGMC.38607	d__Bacteria;p__Bacillota_I;c__Bacilli_A;o__RFN20;f__CAG-826;g__RUG14515;s__	457.645	266.179	163.761	336.816	291.96	375.878	424.644	442.338	533.591	181.166	99.6374	0	210.758	239.907	195.272	579.685	280.147	279.354
RGMC.3861	d__Bacteria;p__Bacteroidota;c__Bacteroidia;o__Bacteroidales;f__Bacteroidaceae;g__Ga6A1;s__Ga6A1 sp900102385	0	0	0	0	0	0	216.27	0	0	0	0	0	0	0	0	0	0	0
RGMC.3862	d__Bacteria;p__Bacillota_A;c__Clostridia;o__Oscillospirales;f__Ruminococcaceae;g__HUN007;s__HUN007 sp017438745	1596.05	2096.43	2028.22	1872.73	2425.38	1822.58	2357.03	1629.51	1650.47	1512.25	1469.22	1975.32	1446.53	1424.54	1534.76	1788.41	1539.13	1533.65
RGMC.38623	d__Bacteria;p__Verrucomicrobiota;c__Kiritimatiellia;o__RFP12;f__UBA3636;g__UBA3636;s__	274.913	0	0	0	0	0	0	175.896	262.224	0	0	0	0	0	0	0	0	0
RGMC.38624	d__Bacteria;p__Bacteroidota;c__Bacteroidia;o__Bacteroidales;f__Bacteroidaceae;g__Prevotella;s__Prevotella sp902801155	282.29	194.2	0	218.549	230.985	281.689	320.388	232.203	338.89	0	0	0	246.184	0	232.528	478.572	275.212	271.869
RGMC.3866	d__Bacteria;p__Bacteroidota;c__Bacteroidia;o__Bacteroidales;f__UBA3824;g__UBA3824;s__	576.187	317.584	287.487	285.751	258.314	313.919	343.195	342.581	738.261	117.82	0	0	166.635	124.969	88.8898	290.62	231.056	224.43
RGMC.38678	d__Bacteria;p__Spirochaetota;c__Spirochaetia;o__Sphaerochaetales;f__Sphaerochaetaceae;g__UBA9732;s__UBA9732 sp902796335	174.409	0	0	391.09	387.027	242.648	689.966	207.413	370.672	358.22	242.849	290.866	460.632	388.207	410.938	456.708	355.606	340.49
RGMC.38684	d__Bacteria;p__Bacteroidota;c__Bacteroidia;o__Bacteroidales;f__Bacteroidaceae;g__Prevotella;s__Prevotella sp902801155	250.07	177.7	0	203.696	0	264.077	304.466	228.529	307.749	0	0	0	229.246	0	218.83	429.393	247.532	247.702
RGMC.38719	d__Bacteria;p__Bacillota_I;c__Bacilli_A;o__RFN20;f__CAG-826;g__RUG13091;s__	246.735	127.515	0	273.897	349.858	239.35	484.766	268.009	324.719	326.284	290.854	293.314	460.286	560.489	394.664	390.625	284.156	289.752
RGMC.38735	d__Archaea;p__Methanobacteriota;c__Methanobacteria;o__Methanobacteriales;f__Methanobacteriaceae;g__Methanobrevibacter;s__Methanobrevibacter sp902784195	0	0	0	0	0	532.652	0	704.537	0	0	0	0	0	0	0	0	0	0
RGMC.38743	d__Bacteria;p__Bacteroidota;c__Bacteroidia;o__Bacteroidales;f__P3;g__UBA1217;s__UBA1217 sp902788805	307.567	212.766	0	0	0	240.493	0	173.701	335.866	0	0	0	0	0	0	214.959	0	0
RGMC.38754	d__Bacteria;p__Spirochaetota;c__Spirochaetia;o__CADAEX01;f__CADAEX01;g__CADAEX01;s__CADAEX01 sp902787125	0	0	0	0	0	0	339.768	0	0	0	0	0	0	0	0	0	0	0
RGMC.38763	d__Bacteria;p__Bacteroidota;c__Bacteroidia;o__Bacteroidales;f__Paludibacteraceae;g__RF16;s__RF16 sp902769535	336.202	193.523	176.371	0	0	0	0	171.672	322.141	0	0	0	0	0	0	285.933	0	0
RGMC.38764	d__Bacteria;p__Bacillota_A;c__Clostridia;o__Christensenellales;f__CAG-138;g__UBA3792;s__UBA3792 sp017428025	0	0	0	102.588	131.939	100.052	124.984	122.571	0	145.795	164.989	175.96	169.281	179.551	154.709	0	118.54	114.474
RGMC.38765	d__Bacteria;p__Bacteroidota;c__Bacteroidia;o__Bacteroidales;f__UBA932;g__Cryptobacteroides;s__Cryptobacteroides sp902787255	0	0	0	0	123.519	0	145.586	0	130.218	179.651	199.901	234.449	377.324	334.444	354.418	145.346	0	0
RGMC.38767	d__Bacteria;p__Bacillota_A;c__Clostridia;o__Lachnospirales;f__Lachnospiraceae;g__UBA2868;s__UBA2868 sp900320345	0	447.749	644.363	0	0	0	0	0	0	0	0	0	0	0	0	0	0	0
RGMC.38790	d__Archaea;p__Methanobacteriota;c__Methanobacteria;o__Methanobacteriales;f__Methanobacteriaceae;g__Methanobrevibacter;s__Methanobrevibacter sp902784195	0	0	0	0	0	482.741	0	599.788	0	0	0	0	0	0	0	0	0	0
RGMC.3883	d__Bacteria;p__Bacillota_A;c__Clostridia;o__Oscillospirales;f__Oscillospiraceae;g__Limivicinus;s__Limivicinus sp900317375	0	443.947	443.999	596.383	609.162	445.091	453.939	400.081	0	1117.95	913.572	964.902	700.011	728.933	678.887	360.901	657.851	643.435
RGMC.38830	d__Bacteria;p__Spirochaetota;c__Spirochaetia;o__Treponematales;f__Treponemataceae;g__Treponema_D;s__	577.098	367.322	279.153	424.482	527.748	399.585	675.03	462.836	642.436	999.33	539.685	550.135	856.689	1036.75	828.077	664.741	418.746	422.281
RGMC.38834	d__Bacteria;p__Fibrobacterota;c__Fibrobacteria;o__Fibrobacterales;f__Fibrobacteraceae;g__Fibrobacter;s__	1426.29	833.725	734.308	815.372	856.789	863.421	918.372	792.891	1597.54	0	232.621	238.146	368.78	383.495	329.924	1212.78	592.877	591.779
RGMC.3885	d__Bacteria;p__Bacteroidota;c__Bacteroidia;o__Bacteroidales;f__UBA3824;g__UBA3824;s__UBA3824 sp017394445	973.632	664.455	587.947	490.482	521.997	565.899	647.521	658.547	1164.78	441.445	199.801	198.463	399.958	338.929	274.026	711.513	469.884	470.47
RGMC.38851	d__Bacteria;p__Spirochaetota;c__Spirochaetia;o__CADAEX01;f__CADAEX01;g__CADAEX01;s__CADAEX01 sp902787125	0	0	0	0	0	0	171.149	0	0	0	0	0	0	0	0	0	0	0
RGMC.38863	d__Bacteria;p__Spirochaetota;c__Spirochaetia;o__Sphaerochaetales;f__Sphaerochaetaceae;g__UBA9732;s__UBA9732 sp902796335	426.877	0	0	403.284	540.029	309.176	1345.95	791.556	454.726	367.38	412.096	446.64	915.827	1089.41	492.249	996.464	599.2	591.64
RGMC.38870	d__Bacteria;p__Spirochaetota;c__Spirochaetia;o__Sphaerochaetales;f__Sphaerochaetaceae;g__UBA9732;s__UBA9732 sp902796335	136.954	0	0	294.363	284.627	183.898	521.648	167.945	297.074	240.441	190.526	199.179	344.807	287.97	310.252	351.887	246.805	244.712
RGMC.3890	d__Bacteria;p__Bacillota_A;c__Clostridia;o__Lachnospirales;f__Lachnospiraceae;g__XBB1006;s__XBB1006 sp016283755	570.648	112.539	0	1185.33	678.966	993.133	1626.44	1063.81	768.884	0	0	0	223.703	260.196	178.727	1592.41	1107.98	1095.26
RGMC.38915	d__Bacteria;p__Spirochaetota;c__Spirochaetia;o__Sphaerochaetales;f__Sphaerochaetaceae;g__UBA9732;s__UBA9732 sp902796335	341.365	0	0	548.303	682.772	376.906	1441.46	811.673	542.672	517.095	444.904	518.333	944.835	1128.03	608.344	834.961	600.206	586.315
RGMC.38919	d__Bacteria;p__Bacillota_B;c__Dehalobacteriia;o__UBA4068;f__UBA4068;g__CALXSV01;s__CALXSV01 sp947307285	0	0	0	0	141.236	0	0	0	0	853.667	773.725	718.638	751.413	765.132	574.944	0	0	86.323
RGMC.3892	d__Bacteria;p__Bacteroidota;c__Bacteroidia;o__Bacteroidales;f__Bacteroidaceae;g__Ga6A1;s__Ga6A1 sp900102385	224.469	0	0	0	0	0	235.836	0	228.109	0	0	0	0	0	0	216.724	0	0
RGMC.38935	d__Bacteria;p__Bacteroidota;c__Bacteroidia;o__Bacteroidales;f__UBA932;g__Cryptobacteroides;s__	148.234	0	0	0	0	0	0	0	0	163.385	0	0	0	0	0	0	0	0
RGMC.38936	d__Bacteria;p__Bacillota_A;c__Clostridia;o__Saccharofermentanales;f__Saccharofermentanaceae;g__Saccharofermentans;s__Saccharofermentans sp024695505	0	301.88	169.418	345.165	288.351	306.671	246.205	240.523	176.011	300.98	262.87	277.395	178.23	175.814	227.51	251.845	272.205	275.962
RGMC.38941	d__Bacteria;p__Fibrobacterota;c__Fibrobacteria;o__Fibrobacterales;f__Fibrobacteraceae;g__Fibrobacter;s__	801.24	503.186	0	0	0	0	0	0	876.264	0	0	0	0	0	0	0	0	0
RGMC.38973	d__Archaea;p__Methanobacteriota;c__Methanobacteria;o__Methanobacteriales;f__Methanobacteriaceae;g__Methanobrevibacter;s__	0	186.143	0	584.432	0	915.346	0	1046.85	0	0	0	0	0	0	410.474	0	441.873	435.048
RGMC.3898	d__Bacteria;p__Bacteroidota;c__Bacteroidia;o__Bacteroidales;f__UBA3824;g__UBA3824;s__UBA3824 sp017394445	856.949	594.293	528.35	436.339	450.59	491.054	565.153	567.231	1029.28	391.179	176.398	169.607	350.914	291.496	235.136	620.716	408.55	410.941
RGMC.38981	d__Bacteria;p__Spirochaetota;c__Spirochaetia;o__CADAEX01;f__CADAEX01;g__CADAEX01;s__CADAEX01 sp902787125	0	0	0	0	0	0	125.257	0	0	0	0	0	0	0	0	0	0	0
RGMC.38992	d__Bacteria;p__Bacillota_A;c__Clostridia;o__Lachnospirales;f__Lachnospiraceae;g__UBA2868;s__	1902.15	6716.42	8758.82	5411.93	5471.46	3574.02	3074.04	2330.58	2152.86	2159.36	2846.28	3078.81	1350.15	988.974	1844.5	2970.69	5967.38	5813.92
RGMC.3903	d__Bacteria;p__Bacteroidota;c__Bacteroidia;o__Bacteroidales;f__Bacteroidaceae;g__Ga6A1;s__Ga6A1 sp900102385	161.623	0	0	0	0	0	196.446	0	168.025	0	0	0	0	0	0	156.789	0	0
RGMC.39035	d__Archaea;p__Methanobacteriota;c__Methanobacteria;o__Methanobacteriales;f__Methanobacteriaceae;g__Methanobrevibacter;s__	137.974	309.161	0	647.759	583.469	962.921	535.348	1094.47	280.57	591.088	582.603	572.671	463.971	559.412	484.975	315.959	438.903	424.646
RGMC.39036	d__Bacteria;p__Bacteroidota;c__Bacteroidia;o__Bacteroidales;f__UBA932;g__Cryptobacteroides;s__Cryptobacteroides sp017429885	283.912	164.463	210.852	0	0	137.445	0	135.554	200.225	0	0	0	0	0	0	191.52	116.073	114.343
RGMC.39094	d__Bacteria;p__Bacteroidota;c__Bacteroidia;o__Bacteroidales;f__Paludibacteraceae;g__RF16;s__RF16 sp017394705	528.624	306.263	313.002	232.699	152.227	230.049	236.24	232.58	473.212	0	0	0	118.235	111.237	112.659	405.125	171.871	171.83
RGMC.39098	d__Bacteria;p__Bacillota_A;c__Clostridia;o__Christensenellales;f__Aristaeellaceae;g__UBA4246;s__	0	1231	1245.85	1219.49	1168.74	1339.14	862.067	1016.92	0	1703.63	1632.38	1974	0	0	1405.33	0	1437.2	1434.74
RGMC.39104	d__Bacteria;p__Bacillota_A;c__Clostridia;o__Oscillospirales;f__Oscillospiraceae;g__UBA1774;s__UBA1774 sp017545325	645.8	659.085	476.497	970.695	924.338	868.89	871.057	882.756	461.076	1250.93	1096.35	1134.53	973.274	1055.05	941.865	791.069	974.463	951.992
RGMC.3912	d__Bacteria;p__Bacillota_A;c__Clostridia;o__Saccharofermentanales;f__Saccharofermentanaceae;g__Firm-16;s__Firm-16 sp017428545	0	0	0	0	0	0	0	0	0	282.248	190.404	197.444	0	0	150.554	0	0	0
RGMC.39120	d__Bacteria;p__Bacillota_A;c__Clostridia;o__Christensenellales;f__CAG-138;g__UBA3792;s__UBA3792 sp017428025	0	0	0	0	140.536	117.122	130.729	128.635	0	143.586	158.609	173.599	156.959	178.09	147.208	0	131.624	126.863
RGMC.39128	d__Bacteria;p__Bacteroidota;c__Bacteroidia;o__Bacteroidales;f__Paludibacteraceae;g__RF16;s__	601.077	402.939	484.402	343.896	230.109	358.5	403.641	365.873	683.217	0	0	0	152.334	126.069	118.306	618.326	292.856	294.772
RGMC.39150	d__Bacteria;p__Bacteroidota;c__Bacteroidia;o__Bacteroidales;f__WCHB1-69;g__F23-D06;s__F23-D06 sp017540505	0	0	0	252.081	575.666	133.805	456.154	101.425	119.667	766.697	521.285	585.542	572.889	553.745	554.678	283.933	337.423	335.616
RGMC.39153	d__Bacteria;p__Bacillota_A;c__Clostridia;o__Christensenellales;f__Aristaeellaceae;g__RUG563;s__	1038.23	915.627	756.959	1512.91	1591.28	1016.28	1144.49	694.928	961.734	1527.08	1455.56	1490.12	1149.17	993.279	1320.8	1243.4	1343	1289.76
RGMC.39172	d__Bacteria;p__Planctomycetota;c__Planctomycetia;o__Pirellulales;f__Thermoguttaceae;g__RUG695;s__RUG695 sp902766935	0	0	0	0	0	0	126.062	0	0	294.67	179.322	179.581	182.779	174.772	151.712	0	0	0
RGMC.39174	d__Bacteria;p__Bacteroidota;c__Bacteroidia;o__Bacteroidales;f__F082;g__Limimorpha;s__Limimorpha sp902801465	0	0	0	228.216	0	166.948	223.093	0	140.899	0	0	0	0	0	0	300.188	198.043	198.416
RGMC.39189	d__Bacteria;p__Bacillota_A;c__Clostridia;o__Oscillospirales;f__Acutalibacteraceae;g__SIG598;s__	0	0	0	0	0	0	0	0	0	0	418.904	506.094	328.862	331.646	349.104	0	0	0
RGMC.39195	d__Bacteria;p__Bacteroidota;c__Bacteroidia;o__Bacteroidales;f__UBA932;g__Cryptobacteroides;s__Cryptobacteroides sp002309995	272.997	163.126	187.188	181.769	0	168.916	364.976	198.937	276.404	235.356	0	0	0	0	197.747	288.312	233.562	228.615
RGMC.3920	d__Bacteria;p__Bacillota_A;c__Clostridia;o__Lachnospirales;f__Lachnospiraceae;g__CAG-411;s__CAG-411 sp902795895	0	0	0	0	0	0	0	0	0	0	293.847	0	0	0	0	0	0	0
RGMC.39200	d__Bacteria;p__Synergistota;c__Synergistia;o__Synergistales;f__Aminobacteriaceae;g__JAFUYV01;s__JAFUYV01 sp016280565	620.217	451.699	497.716	380.34	330.636	374.544	408.118	434.412	412.601	516.537	373.522	367.575	363.748	417.18	328.874	489.013	409.22	405.503
RGMC.39203	d__Bacteria;p__Bacillota_A;c__Clostridia;o__Oscillospirales;f__Acutalibacteraceae;g__UBA737;s__	0	0	0	0	0	0	99.3605	80.7443	0	122.945	0	0	0	0	0	0	103.021	98.0855
RGMC.39213	d__Bacteria;p__Bacillota_C;c__Negativicutes;o__Acidaminococcales;f__Acidaminococcaceae;g__Succiniclasticum;s__Succiniclasticum sp017443005	164.506	144.75	183.071	126.676	0	0	0	0	0	0	0	0	0	0	0	0	0	0
RGMC.39216	d__Bacteria;p__Bacteroidota;c__Bacteroidia;o__Bacteroidales;f__P3;g__UBA1711;s__UBA1711 sp946406015	0	0	0	904.673	1203.14	0	1582.4	0	0	740.794	502.169	536.395	594.271	573.274	556.767	384.163	1353.8	1321.95
RGMC.39253	d__Bacteria;p__Bacteroidota;c__Bacteroidia;o__Bacteroidales;f__P3;g__UBA1217;s__UBA1217 sp902788805	237.963	0	0	0	0	0	0	0	264.149	0	0	0	0	0	0	0	0	0
RGMC.3927	d__Bacteria;p__Bacteroidota;c__Bacteroidia;o__Bacteroidales;f__UBA3824;g__UBA3824;s__UBA3824 sp017394445	878.341	595.716	539.281	430.996	450.748	501.125	573.427	587.141	1041.53	391.735	175.783	174.701	352.102	300.688	242.258	657.311	421.613	416.221
RGMC.39274	d__Bacteria;p__Spirochaetota;c__Spirochaetia;o__Treponematales;f__Treponemataceae;g__Treponema_D;s__Treponema_D sp002309195	0	0	0	0	0	0	0	0	0	0	0	0	131.343	177.23	125.373	0	0	0
RGMC.39283	d__Bacteria;p__Spirochaetota;c__Spirochaetia;o__Treponematales;f__Treponemataceae;g__Treponema_D;s__Treponema_D sp017544745	190.332	0	0	0	216.687	0	271.221	0	230.054	449.844	183.786	208.369	308.504	314.658	290.045	260.099	174.338	172.039
RGMC.39328	d__Bacteria;p__Bacteroidota;c__Bacteroidia;o__Bacteroidales;f__ML635J-15;g__Bact-19;s__Bact-19 sp902791865	0	0	0	0	0	0	0	0	0	0	0	0	362.625	410.073	326.716	0	0	0
RGMC.39336	d__Bacteria;p__Bacteroidota;c__Bacteroidia;o__Bacteroidales;f__UBA932;g__Cryptobacteroides;s__	208.456	0	0	0	0	0	162.473	0	169.379	226.657	0	0	141.744	0	0	179.132	135.358	134.13
RGMC.3935	d__Bacteria;p__Bacillota_A;c__Clostridia;o__Christensenellales;f__Christensenellaceae;g__QANA01;s__QANA01 sp017439085	657.401	441.657	150.085	431.768	457.143	423.924	616.917	605.432	544.983	336.797	394.838	435.39	491.468	500.175	431.709	548.46	486.294	488.453
RGMC.39375	d__Bacteria;p__Bacillota_A;c__Clostridia;o__Oscillospirales;f__Acutalibacteraceae;g__UBA737;s__	0	0	0	78.4458	0	0	0	84.5791	0	99.4246	0	0	0	0	0	0	80.538	84.1076
RGMC.3938	d__Bacteria;p__Bacteroidota;c__Bacteroidia;o__Bacteroidales;f__Bacteroidaceae;g__Ga6A1;s__Ga6A1 sp900102385	218.621	0	0	0	0	0	232.246	0	219.827	0	0	0	0	0	0	0	0	0
RGMC.39385	d__Bacteria;p__Bacteroidota;c__Bacteroidia;o__Bacteroidales;f__Paludibacteraceae;g__RF16;s__	526.498	361.197	424.56	303.327	202.059	312.696	353.791	332.653	594.937	0	0	0	105.243	0	80.3494	516.327	240.888	249.318
RGMC.39415	d__Bacteria;p__Bacillota_A;c__Clostridia;o__Lachnospirales;f__Lachnospiraceae;g__Moryella;s__Moryella sp902780465	0	916.279	893.973	1096.92	1244.72	1117.83	1211.33	1664.66	0	0	756.129	974.54	699.534	1131.11	749.281	0	1008.09	987.254
RGMC.39424	d__Bacteria;p__Spirochaetota;c__Spirochaetia;o__CADAEX01;f__CADAEX01;g__CADAEX01;s__CADAEX01 sp902787125	0	0	0	0	0	0	291.965	0	0	0	0	0	0	0	0	0	0	0
RGMC.39426	d__Bacteria;p__Bacteroidota;c__Bacteroidia;o__Bacteroidales;f__Bacteroidaceae;g__UBA4372;s__	529.949	275.98	224.474	374.277	307.177	291.578	403.711	286.856	549.28	169.889	178.51	183.394	228.369	199.806	236.416	580.898	283.999	286.138
RGMC.39440	d__Bacteria;p__Bacteroidota;c__Bacteroidia;o__Bacteroidales;f__WCHB1-69;g__UBA1756;s__	0	0	0	0	172.806	0	0	0	0	258.439	226.514	257.786	376.191	283.553	347.437	0	0	0
RGMC.39474	d__Bacteria;p__Verrucomicrobiota;c__Kiritimatiellia;o__RFP12;f__JAAYLN01;g__RGIG5952;s__	260.14	136.842	0	194.975	194.889	165.426	256.535	177.991	242.149	0	0	0	151.379	0	126.643	269.192	195.564	191.62
RGMC.39509	d__Bacteria;p__Bacteroidota;c__Bacteroidia;o__Bacteroidales;f__Bacteroidaceae;g__UBA4372;s__	187.083	0	0	0	0	0	0	0	174.424	0	0	0	0	0	0	183.624	0	0
RGMC.39512	d__Bacteria;p__Bacillota_A;c__Clostridia;o__Peptostreptococcales;f__Anaerovoracaceae;g__UBA3871;s__	0	0	0	0	0	0	644.174	0	0	0	0	0	0	0	0	0	629.066	614.257
RGMC.396	d__Archaea;p__Methanobacteriota;c__Methanobacteria;o__Methanobacteriales;f__Methanobacteriaceae;g__Methanobrevibacter_A;s__Methanobrevibacter_A sp024689425	3977.22	3531.12	2301.32	10844.2	31623.8	6678.73	18871.3	5790.88	2972.1	71688.2	67560.1	64819.7	68724	75532.6	61223.4	6005.21	19465.7	19330.8
RGMC.39607	d__Bacteria;p__Bacteroidota;c__Bacteroidia;o__Bacteroidales;f__UBA932;g__Cryptobacteroides;s__	952.105	580.71	662.07	580.618	460.427	575.376	519.526	541.152	622.256	643.652	575.314	532.649	550.514	612.489	486.228	746.96	599.008	589.031
RGMC.39612	d__Bacteria;p__Bacteroidota;c__Bacteroidia;o__Bacteroidales;f__BM520;g__RGIG7150;s__RGIG7150 sp016285515	0	0	0	0	224.38	0	382.209	0	0	362.413	247.142	238.643	357.988	476.152	246.702	135.111	165.305	169.045
RGMC.39632	d__Bacteria;p__Bacillota_A;c__Clostridia;o__Lachnospirales;f__Lachnospiraceae;g__RGIG5612;s__RGIG5612 sp017511185	296.853	797.023	1022.1	556.561	447.81	748.163	479.903	1013.76	296.322	368.672	439.141	444.305	423.406	482.781	409.922	384.728	556.708	557.552
RGMC.39639	d__Bacteria;p__Bacteroidota;c__Bacteroidia;o__Bacteroidales;f__Bacteroidaceae;g__UBA1179;s__	1013.26	0	0	0	0	0	0	0	1210.77	0	0	0	0	0	0	0	0	0
RGMC.39640	d__Bacteria;p__Bacteroidota;c__Bacteroidia;o__Bacteroidales;f__UBA932;g__Cryptobacteroides;s__Cryptobacteroides sp017400135	1126.4	0	0	0	0	0	0	0	0	0	0	0	0	0	0	0	760.367	753.339
RGMC.39652	d__Bacteria;p__Bacteroidota;c__Bacteroidia;o__Bacteroidales;f__F082;g__Limimorpha;s__	519.706	160.289	0	1434.62	1829.42	767.199	2831.02	690.852	912.12	1891.64	1168.72	1291.93	1820.73	2236.15	1644.38	1563.09	1451.43	1443.45
RGMC.39653	d__Bacteria;p__Synergistota;c__Synergistia;o__Synergistales;f__Aminobacteriaceae;g__JAFUYV01;s__JAFUYV01 sp016280565	1422.59	948.155	1175.65	782.234	719.337	795.479	856.039	884.499	1023.78	1183.3	781.509	767.188	773.057	851.051	674.993	1236.58	994.274	973.584
RGMC.39654	d__Bacteria;p__Bacteroidota;c__Bacteroidia;o__Bacteroidales;f__Paludibacteraceae;g__RF16;s__RF16 sp017450605	346.136	173.111	172.825	178.148	195.176	181.46	248.708	150.454	288.914	238.275	127.454	0	189.287	0	205.584	323.095	196.359	202.6
RGMC.39667	d__Bacteria;p__Bacteroidota;c__Bacteroidia;o__Bacteroidales;f__UBA932;g__Cryptobacteroides;s__	1025.24	658.238	672.652	646.383	476.403	583.88	522.666	513.364	938	333.109	294.571	336.543	340.168	323.255	366.842	806.568	458.262	452.849
RGMC.3968	d__Bacteria;p__Bacteroidota;c__Bacteroidia;o__Bacteroidales;f__Bacteroidaceae;g__Ga6A1;s__Ga6A1 sp900102385	194.512	0	0	0	0	0	231.669	0	196.19	0	0	0	0	0	0	192.286	0	0
RGMC.39682	d__Bacteria;p__Bacteroidota;c__Bacteroidia;o__Bacteroidales;f__BM520;g__RGIG7150;s__RGIG7150 sp016285515	0	0	0	0	126.711	0	200.359	0	0	203.672	131.731	125.11	177.668	221.353	142.13	0	105.261	107.787
RGMC.39684	d__Bacteria;p__Bacillota_I;c__Bacilli_A;o__Erysipelotrichales;f__Erysipelotrichaceae;g__RUG521;s__RUG521 sp017405785	0	0	0	0	0	0	0	0	0	0	0	0	0	0	116.551	0	0	0
RGMC.39696	d__Bacteria;p__Bacillota_A;c__Clostridia;o__Christensenellales;f__DTU072;g__CAG-1782;s__CAG-1782 sp946621465	0	0	0	0	0	0	96.1613	0	121.736	0	0	0	0	0	0	102.433	0	0
RGMC.39721	d__Bacteria;p__Fibrobacterota;c__Fibrobacteria;o__Fibrobacterales;f__Fibrobacteraceae;g__Fibrobacter;s__Fibrobacter sp017530965	3853.89	2201.6	2014.62	2249.39	2361.54	2368.75	2623.09	2244.16	4499.03	490.465	654.283	654.113	1024.54	1071.16	928.88	3399.84	1652.7	1628.8
RGMC.39727	d__Bacteria;p__Bacteroidota;c__Bacteroidia;o__Bacteroidales;f__Paludibacteraceae;g__UBA1181;s__UBA1181 sp016285885	0	0	0	0	0	0	0	0	0	522.13	0	0	0	0	0	0	0	0
RGMC.39735	d__Bacteria;p__Bacillota_A;c__Clostridia;o__Lachnospirales;f__Lachnospiraceae;g__Pseudobutyrivibrio;s__	0	1766.1	2232.99	1775.4	1993.85	1275.45	1317.59	903.636	1102.48	0	2655.32	1618.71	1144.07	703.87	1040.71	0	1146.79	1117.65
RGMC.39740	d__Bacteria;p__Bacteroidota;c__Bacteroidia;o__Bacteroidales;f__Bacteroidaceae;g__UBA1179;s__UBA1179 sp902763885	271.455	155.227	159.647	185.567	160.763	216.153	199.617	204.546	356.886	0	0	0	141.351	0	130.542	260.423	126.974	126.047
RGMC.39784	d__Bacteria;p__Planctomycetota;c__Planctomycetia;o__Pirellulales;f__Thermoguttaceae;g__RGIG3701;s__	0	0	0	0	899.947	0	553.23	0	0	1099.04	1532.08	1710.86	1629.34	1657.37	1640.68	0	181.307	178.99
RGMC.39845	d__Bacteria;p__Bacteroidota;c__Bacteroidia;o__Bacteroidales;f__UBA932;g__Cryptobacteroides;s__	952.139	624.068	611.803	623.499	441.833	566.252	460.833	447.487	844.809	263.733	279.956	328.344	332.707	299.77	359.021	734.293	411.428	406.845
RGMC.3987	d__Archaea;p__Methanobacteriota;c__Methanobacteria;o__Methanobacteriales;f__Methanobacteriaceae;g__Methanobrevibacter;s__	0	392.359	0	1325.88	1383.82	2188.1	1581	2680.2	533.761	1374.47	1188.85	1133.85	1214.15	1522.16	1102.48	678.216	998.91	996.923
RGMC.39878	d__Archaea;p__Methanobacteriota;c__Methanobacteria;o__Methanobacteriales;f__Methanobacteriaceae;g__Methanobrevibacter_A;s__Methanobrevibacter_A sp017409525	154.837	267.028	0	0	0	264.429	0	310.44	0	0	0	0	0	0	0	0	0	302.638
RGMC.39887	d__Bacteria;p__Bacteroidota;c__Bacteroidia;o__Bacteroidales;f__UBA932;g__Bact-11;s__Bact-11 sp017428245	640.821	398.503	470.991	403.781	386.165	397.984	463.683	439.916	474.407	585.836	465.804	460.012	492.6	525.97	416.991	490.506	428.889	421.953
RGMC.39912	d__Bacteria;p__Bacteroidota;c__Bacteroidia;o__Bacteroidales;f__Bacteroidaceae;g__Prevotella;s__	10457.7	5556.98	5386.35	6665.41	6765.55	6079.47	6508.92	5286.67	10157.9	4925.65	4202.85	4991.19	4884.41	4370.73	4991.95	8620.08	5093.64	5041.22
RGMC.39917	d__Bacteria;p__Eremiobacterota;c__CADAWZ01;o__CADAWZ01;f__CADAWZ01;g__JAKSUM01;s__	0	0	0	0	304.275	0	182.091	0	0	1353.2	1365.52	1286.97	1109.93	1336.02	902.741	0	175.769	178.748
RGMC.39944	d__Bacteria;p__Desulfobacterota;c__Desulfuromonadia;o__Desulfuromonadales;f__JAAYDE01;g__RGIG7977;s__	0	0	0	0	0	0	242.917	0	0	353.874	296.099	304.227	267.267	312.45	251.911	0	251.394	255.635
RGMC.39974	d__Bacteria;p__Bacillota_A;c__Clostridia;o__Lachnospirales;f__Lachnospiraceae;g__UBA2868;s__UBA2868 sp017450065	0	0	395.47	0	0	0	0	0	0	0	0	0	0	0	0	0	0	0
RGMC.39976	d__Bacteria;p__Bacteroidota;c__Bacteroidia;o__Bacteroidales;f__Bacteroidaceae;g__Prevotella;s__Prevotella sp902801155	234.814	171.661	0	194.6	200.012	253.314	286.934	214.11	300.159	0	0	0	227.422	0	217.578	420.224	247.725	242.689
RGMC.39981	d__Bacteria;p__Spirochaetota;c__Spirochaetia;o__CADAEX01;f__CADAEX01;g__CADAEX01;s__CADAEX01 sp902787125	0	0	0	0	0	0	273.648	0	0	0	0	0	0	0	0	0	0	0
RGMC.39993	d__Bacteria;p__Bacteroidota;c__Bacteroidia;o__Bacteroidales;f__Bacteroidaceae;g__UBA4372;s__	409.242	209.071	177.899	301.513	242.527	236.168	332.167	227.366	446.935	128.787	143.767	139.066	183.995	163.589	193.374	442.782	218.272	218.693
RGMC.40006	d__Bacteria;p__Bacillota_I;c__Bacilli_A;o__Acholeplasmatales;f__Anaeroplasmataceae;g__Anaeroplasma;s__	499.019	351.711	240.244	296.159	229.129	428.796	342.349	511.882	731.546	0	0	0	0	0	0	476.531	173.554	172.799
RGMC.4002	d__Bacteria;p__Bacteroidota;c__Bacteroidia;o__Bacteroidales;f__Bacteroidaceae;g__Ga6A1;s__Ga6A1 sp900102385	165.247	0	0	0	0	0	207.72	0	174.13	0	0	0	0	0	0	161.472	0	0
RGMC.40024	d__Bacteria;p__Bacillota_A;c__Clostridia;o__Christensenellales;f__Aristaeellaceae;g__Aristaeella;s__	0	0	0	0	0	0	0	0	0	235.582	0	0	0	0	0	0	0	0
RGMC.40033	d__Bacteria;p__Bacillota_B;c__Dehalobacteriia;o__UBA4068;f__UBA4068;g__CALXSV01;s__CALXSV01 sp947307285	0	0	0	0	117.967	0	0	0	0	697.97	612.301	635.931	540.449	512.286	441.918	0	0	0
RGMC.40041	d__Bacteria;p__Pseudomonadota;c__Gammaproteobacteria;o__Burkholderiales;f__Burkholderiaceae;g__Oxalobacter;s__Oxalobacter sp016291665	0	0	0	485.879	0	457.252	0	0	0	0	0	0	0	0	0	726.243	0	0
RGMC.40058	d__Bacteria;p__Verrucomicrobiota;c__Lentisphaeria;o__Victivallales;f__UBA1829;g__UBA1732;s__UBA1732 sp017524965	239.682	141.61	0	0	0	0	0	0	247.195	0	0	0	0	0	0	0	0	0
RGMC.4008	d__Bacteria;p__Bacteroidota;c__Bacteroidia;o__Bacteroidales;f__Bacteroidaceae;g__Ga6A1;s__Ga6A1 sp900102385	0	0	0	0	0	0	190.988	0	0	0	0	0	0	0	0	0	0	0
RGMC.40083	d__Bacteria;p__Bacillota_A;c__Clostridia;o__Lachnospirales;f__Lachnospiraceae;g__UBA1267;s__UBA1267 sp902783795	0	0	0	0	0	165.575	0	0	0	328.282	283.647	256.769	244.09	249.575	213.87	0	191.643	189.488
RGMC.40093	d__Archaea;p__Halobacteriota;c__Methanomicrobia;o__Methanomicrobiales;f__Methanomicrobiaceae;g__Methanomicrobium;s__Methanomicrobium mobile	4152.67	1805.8	2142.79	997.063	1315.49	821.719	1684.11	2432.09	4517.86	2678.85	856.122	1093.49	1441.5	1268.8	1105.86	2762.25	1717.96	1697.98
RGMC.40098	d__Bacteria;p__Bacillota_A;c__Clostridia;o__Oscillospirales;f__Oscillospiraceae;g__UBA1774;s__UBA1774 sp947307505	271.25	284.896	186.926	421.216	494.81	391.755	446.023	421.155	197.166	797.379	760.537	733.22	643.549	717.034	621.308	331.638	467.155	458.998
RGMC.40117	d__Bacteria;p__Bacteroidota;c__Bacteroidia;o__Bacteroidales;f__Bacteroidaceae;g__UBA1179;s__UBA1179 sp902782245	1773.5	1161.61	1711.3	853.903	742.455	1002.72	1109.66	1095.85	2065.98	767.788	420.312	463.068	716.683	815.107	639.676	1287.18	645.26	645.745
RGMC.40138	d__Bacteria;p__Elusimicrobiota;c__Elusimicrobia;o__Elusimicrobiales;f__UBA9959;g__CACZRG01;s__CACZRG01 sp024681855	0	0	0	0	0	0	0	0	0	1814.17	268.757	326.341	622.088	457.457	379.529	0	0	0
RGMC.40161	d__Bacteria;p__Pseudomonadota;c__Alphaproteobacteria;o__Rs-D84;f__Rs-D84;g__Enterousia;s__	0	0	0	0	0	0	0	0	0	0	0	0	0	0	92.0561	0	0	0
RGMC.40185	d__Archaea;p__Methanobacteriota;c__Methanobacteria;o__Methanobacteriales;f__Methanobacteriaceae;g__Methanobrevibacter_A;s__Methanobrevibacter_A sp902789505	0	216.63	0	409.179	682.544	418.112	709.136	513.269	0	0	0	0	0	953.272	548.782	0	535.915	532.678
RGMC.40189	d__Bacteria;p__Spirochaetota;c__Spirochaetia;o__CADAEX01;f__CADAEX01;g__CADAEX01;s__CADAEX01 sp902787125	0	0	0	0	0	0	372.548	0	0	0	0	0	0	0	0	0	0	0
RGMC.40217	d__Bacteria;p__Bacteroidota;c__Bacteroidia;o__Bacteroidales;f__Paludibacteraceae;g__RF16;s__RF16 sp946411385	3960.13	2081.03	1779.7	2201.14	1822.71	2191.49	2716.88	2828.09	3876.09	585.722	706.168	648.457	1113.34	1192.94	933.792	3943.33	1686.35	1688.57
RGMC.40221	d__Bacteria;p__Bacillota_A;c__Clostridia;o__Oscillospirales;f__Oscillospiraceae;g__Limivicinus;s__	6860.69	9649.99	0	11207	8120.42	9252.12	5367.69	3952.34	0	0	12532.3	0	8868.91	6115.38	12639.6	0	10341.9	10061.8
RGMC.40245	d__Bacteria;p__Bacteroidota;c__Bacteroidia;o__Bacteroidales;f__P3;g__UBA1711;s__UBA1711 sp900317125	323.804	235.72	206.069	0	0	0	0	0	0	0	0	0	0	0	0	0	0	0
RGMC.40246	d__Bacteria;p__Synergistota;c__Synergistia;o__Synergistales;f__Aminobacteriaceae;g__JAFUYV01;s__JAFUYV01 sp016280565	485.882	412.014	466.619	337.103	327.043	345.818	390.117	416.483	351.773	493.726	358.589	341.704	348.058	417.238	314.171	410.321	391.913	389.174
RGMC.40257	d__Bacteria;p__Bacillota_I;c__Bacilli_A;o__RFN20;f__CAG-826;g__RUG14515;s__	0	0	0	0	0	0	318.757	0	0	0	0	0	282.041	256.336	325.845	0	0	0
RGMC.40267	d__Bacteria;p__Bacteroidota;c__Bacteroidia;o__Bacteroidales;f__UBA932;g__Cryptobacteroides;s__Cryptobacteroides sp946406355	2655.71	1698.87	1871.77	1204.46	771.577	1319.58	898.268	1435.93	2159.71	358.416	360.625	349.194	402.497	392.183	394.475	1522.52	730.818	725.581
RGMC.40273	d__Bacteria;p__Bacteroidota;c__Bacteroidia;o__Bacteroidales;f__ML635J-15;g__Bact-19;s__Bact-19 sp902791865	0	0	0	0	0	0	0	0	0	0	0	0	442.528	513.597	394.464	0	0	0
RGMC.40291	d__Bacteria;p__Bacillota_A;c__Clostridia;o__Saccharofermentanales;f__Saccharofermentanaceae;g__Firm-16;s__Firm-16 sp017428545	0	0	0	0	0	0	0	0	0	236.564	155.375	0	0	0	0	0	0	0
RGMC.40292	d__Bacteria;p__Bacteroidota;c__Bacteroidia;o__Bacteroidales;f__UBA932;g__Cryptobacteroides;s__	289.261	174.201	211.181	0	0	0	0	166.028	205.982	275.085	189.312	199.035	191.516	0	175.673	225.961	158.358	158.708
RGMC.40295	d__Bacteria;p__Bacillota_A;c__Clostridia;o__Oscillospirales;f__Acutalibacteraceae;g__RUG592;s__RUG592 sp902785425	0	1834.29	1625.3	1250.92	1190	1213.33	724.8	1180.4	636.327	1400.18	2421.7	3109.27	2218.69	2037.62	2596.54	659.76	1278.25	1272.12
RGMC.40299	d__Bacteria;p__Bacteroidota;c__Bacteroidia;o__Bacteroidales;f__Bacteroidaceae;g__UBA1179;s__UBA1179 sp902763885	376.294	227.01	237.267	272.249	233.949	314.373	319.868	334.282	497.68	0	0	0	218.124	221.747	199.281	357.073	183.459	182.658
RGMC.40310	d__Bacteria;p__Bacillota_A;c__Clostridia;o__Oscillospirales;f__Oscillospiraceae;g__Limivicinus;s__Limivicinus sp017434755	0	133.653	129.374	0	0	161.19	0	161.399	0	182.509	190.711	176.301	159.522	189.926	154.69	0	140.507	141.207
RGMC.40311	d__Bacteria;p__Bacteroidota;c__Bacteroidia;o__Bacteroidales;f__Bacteroidaceae;g__UBA2918;s__UBA2918 sp946407325	5297.67	3018.08	3822.52	2569.05	1794.23	2417.95	2977.01	2040.8	4598.63	2160.46	1625.13	1583	1995.27	1778.15	1894.78	4364.55	2338.43	2290.22
RGMC.4034	d__Bacteria;p__Bacteroidota;c__Bacteroidia;o__Bacteroidales;f__Bacteroidaceae;g__Ga6A1;s__Ga6A1 sp900102385	184.646	0	0	0	0	0	222.141	0	188.342	0	0	0	0	0	0	183.556	0	0
RGMC.40351	d__Bacteria;p__Bacteroidota;c__Bacteroidia;o__Bacteroidales;f__F082;g__Limimorpha;s__Limimorpha sp902774295	579.615	224.623	0	512.69	312.816	522.06	602.699	677.531	915.304	0	0	0	180.623	182.432	147.962	720.662	322.622	334.662
RGMC.40359	d__Archaea;p__Methanobacteriota;c__Methanobacteria;o__Methanobacteriales;f__Methanobacteriaceae;g__Methanobrevibacter;s__	162.986	405.845	0	856.525	788.483	1469.37	887.921	1901.08	401.915	696.135	644.551	617.608	626.625	774.501	593.885	477.888	665.653	665.485
RGMC.40370	d__Bacteria;p__Bacillota_A;c__Clostridia;o__Saccharofermentanales;f__Saccharofermentanaceae;g__Saccharofermentans;s__	4344.14	7466.8	4457.51	13614.6	16599.4	8771.25	10269.5	5951.68	4965.12	34356.5	22931.6	26508.7	12439.6	12738.4	18578.5	8865.59	14985.4	14609.6
RGMC.40372	d__Bacteria;p__Bacillota_A;c__Clostridia;o__Oscillospirales;f__Oscillospiraceae;g__RGIG7114;s__RGIG7114 sp017445985	0	0	0	0	0	0	0	0	0	179.504	0	0	0	0	0	0	0	0
RGMC.40392	d__Bacteria;p__Bacillota_A;c__Clostridia;o__Oscillospirales;f__Acutalibacteraceae;g__UBA1425;s__	0	0	0	0	0	0	0	0	0	0	0	0	0	257.221	0	0	0	0
RGMC.40394	d__Bacteria;p__Bacillota_A;c__Clostridia;o__Oscillospirales;f__Oscillospiraceae;g__Limivicinus;s__	4478.09	6519.31	0	7398.25	5395.49	6250.05	3522.38	2797.66	3240.42	0	7942.91	8384.4	5528.66	3785.72	8127.53	4538.06	6668.73	6419.5
RGMC.40396	d__Bacteria;p__Bacteroidota;c__Bacteroidia;o__Bacteroidales;f__Bacteroidaceae;g__UBA1179;s__UBA1179 sp017530735	532.213	379.292	527.101	247.889	165.905	291.824	294.388	334.613	569.402	269.486	132.894	0	194.703	208.49	177.174	509.656	194.019	192.573
RGMC.40406	d__Bacteria;p__Bacteroidota;c__Bacteroidia;o__Bacteroidales;f__BM520;g__RGIG7150;s__RGIG7150 sp016285515	0	0	0	0	122.488	0	182.689	0	0	254.793	130.353	145.246	169.841	201.176	156.367	0	113.045	116.421
RGMC.40422	d__Bacteria;p__Bacillota_A;c__Clostridia;o__Oscillospirales;f__Oscillospiraceae;g__RGIG7114;s__RGIG7114 sp946407675	0	159.548	205.208	0	0	164.245	0	186.455	0	209.418	161.282	0	0	172.65	0	0	0	0
RGMC.40437	d__Bacteria;p__Fibrobacterota;c__Fibrobacteria;o__Fibrobacterales;f__Fibrobacteraceae;g__Fibrobacter;s__	276.188	169.226	0	171.256	170.375	0	181.647	166.027	314.164	0	0	0	156.031	160.372	137.642	243.891	0	147.718
RGMC.40467	d__Bacteria;p__Bacteroidota;c__Bacteroidia;o__Bacteroidales;f__Bacteroidaceae;g__UBA1179;s__UBA1179 sp902763885	198.189	109.632	115.137	131.99	116.468	158.344	140.846	144.936	253.526	0	0	0	0	0	91.3521	179.737	0	0
RGMC.40486	d__Bacteria;p__Planctomycetota;c__Planctomycetia;o__Pirellulales;f__Thermoguttaceae;g__RUG369;s__RUG369 sp902803085	334.93	192.707	159.191	233.582	168.107	230.001	217.313	248.672	295.824	212.168	156.441	145.044	169.887	180.74	132.649	326.827	178.409	174.425
RGMC.40492	d__Bacteria;p__Bacillota_C;c__Negativicutes;o__Acidaminococcales;f__Acidaminococcaceae;g__Succiniclasticum;s__Succiniclasticum sp017443005	0	118.352	158.515	0	0	0	0	0	0	0	0	0	0	0	0	0	0	0
RGMC.405	d__Bacteria;p__Bacteroidota;c__Bacteroidia;o__Bacteroidales;f__Bacteroidaceae;g__UBA4372;s__UBA4372 sp024680695	797.301	478.533	340.594	405.053	240.861	531.093	278.208	281.016	656.047	427.106	383.28	298.623	563.543	410.9	506.211	549.9	264.767	265.387
RGMC.40513	d__Bacteria;p__Bacillota_A;c__Clostridia;o__Saccharofermentanales;f__Saccharofermentanaceae;g__Saccharofermentans;s__Saccharofermentans sp024695505	0	335.735	0	417.999	0	365.078	0	296.603	0	0	298.173	0	0	0	0	0	0	0
RGMC.40536	d__Bacteria;p__Bacillota_C;c__Negativicutes;o__Acidaminococcales;f__Acidaminococcaceae;g__Succiniclasticum;s__Succiniclasticum sp017443005	196.096	188.362	257.978	161.083	0	0	0	152.894	0	0	0	0	0	0	0	0	0	168.073
RGMC.40574	d__Bacteria;p__Bacillota_C;c__Negativicutes;o__Acidaminococcales;f__Acidaminococcaceae;g__Succiniclasticum;s__Succiniclasticum sp017443005	154.838	141.908	175.641	132.383	0	0	0	106.913	0	0	0	0	0	0	0	0	0	0
RGMC.40576	d__Bacteria;p__Bacillota_C;c__Negativicutes;o__Acidaminococcales;f__Acidaminococcaceae;g__Succiniclasticum;s__Succiniclasticum sp017443005	180.085	158.573	191.342	0	0	0	0	0	0	0	0	0	0	0	0	0	0	0
RGMC.40583	d__Bacteria;p__Bacteroidota;c__Bacteroidia;o__Bacteroidales;f__UBA932;g__Bact-11;s__	14797.4	9844.51	11045.7	9582.13	8653.82	9169.95	10574.8	9658.35	12760.6	10130.7	7402.37	7228.75	7906.68	8186.24	7204.63	11951	9677.11	9623.97
RGMC.40589	d__Bacteria;p__Desulfobacterota;c__Desulfuromonadia;o__Desulfuromonadales;f__JAAYDE01;g__RGIG7977;s__	0	0	0	0	0	0	0	0	0	0	0	0	0	0	0	0	355.577	353.772
RGMC.40597	d__Bacteria;p__Bacillota_C;c__Negativicutes;o__Acidaminococcales;f__Acidaminococcaceae;g__Succiniclasticum;s__Succiniclasticum sp017443005	175.676	154.193	193.365	0	0	0	0	0	0	0	0	0	0	0	0	0	0	0
RGMC.40599	d__Bacteria;p__Bacteroidota;c__Bacteroidia;o__Bacteroidales;f__Paludibacteraceae;g__RF16;s__RF16 sp902769535	310.337	176.142	167.488	0	0	149.544	0	184.092	312.456	0	0	0	0	0	0	256.598	0	0
RGMC.40677	d__Bacteria;p__Bacillota_C;c__Negativicutes;o__Acidaminococcales;f__Acidaminococcaceae;g__Succiniclasticum;s__Succiniclasticum sp017443005	701.79	652.729	686.93	466.771	0	0	0	600.158	0	0	0	0	0	0	0	0	0	408.357
RGMC.40680	d__Bacteria;p__UBA3054;c__UBA3054;o__UBA3054;f__UBA3054;g__UBA3054;s__UBA3054 sp002366995	956.976	457.886	270.168	731.248	823.567	592.608	1092.36	734.768	1074.27	1065.95	891.869	907.902	1152.83	1261.27	1101.68	1047.44	727.192	729.079
RGMC.40689	d__Bacteria;p__Spirochaetota;c__Spirochaetia;o__CADAEX01;f__CADAEX01;g__CADAEX01;s__CADAEX01 sp902787125	0	0	0	0	0	0	288.929	0	0	0	0	0	0	0	0	0	0	0
RGMC.40695	d__Bacteria;p__Bacteroidota;c__Bacteroidia;o__Bacteroidales;f__WCHB1-69;g__RUG11690;s__RUG11690 sp902771655	9227.48	5041.52	3258.24	3693.48	2016.25	4259.78	3107.61	4396.13	7601.93	1386.71	861.03	950.585	1297.21	1284.26	1198.87	7306.92	3258.52	3213
RGMC.40699	d__Bacteria;p__Bacteroidota;c__Bacteroidia;o__Bacteroidales;f__UBA932;g__Cryptobacteroides;s__	336.11	239.962	271.517	238.246	210.283	224.655	251.055	255.925	315.646	141.902	145.135	143.325	162.665	185.361	159.319	253.691	173.013	172.691
RGMC.40709	d__Archaea;p__Methanobacteriota;c__Methanobacteria;o__Methanobacteriales;f__Methanobacteriaceae;g__Methanobrevibacter_A;s__Methanobrevibacter_A sp017409525	180.293	315.331	0	0	0	309.326	0	366.138	136.168	0	0	0	0	0	0	0	400.549	404.083
RGMC.40710	d__Bacteria;p__Elusimicrobiota;c__Endomicrobiia;o__Endomicrobiales;f__Endomicrobiaceae;g__RUG658;s__	0	0	0	0	0	0	0	0	0	367.039	0	0	247.451	220.111	227.362	0	0	0
RGMC.40717	d__Bacteria;p__Verrucomicrobiota;c__Kiritimatiellia;o__LD1-PB3_B;f__Lenti-01;g__CACXEY01;s__	0	116.274	170.825	145.315	0	0	131.959	112.791	164.945	0	0	0	0	0	0	0	0	0
RGMC.4074	d__Bacteria;p__Bacillota_A;c__Clostridia;o__Saccharofermentanales;f__Saccharofermentanaceae;g__Firm-16;s__Firm-16 sp017428545	0	0	0	0	0	0	0	0	0	135.395	0	0	0	0	0	0	0	0
RGMC.40745	d__Bacteria;p__Myxococcota;c__Bradymonadia;o__UBA4248;f__UBA4248;g__;s__	0	0	0	0	557.709	0	418.251	0	0	181.296	798.037	905.026	1066.78	1160.33	1148.98	0	166.273	164.614
RGMC.40753	d__Bacteria;p__Bacteroidota;c__Bacteroidia;o__Bacteroidales;f__P3;g__UBA1217;s__UBA1217 sp902788805	377.125	250.491	196.627	0	0	294.037	0	225.794	453.161	0	0	0	0	0	0	286.233	0	0
RGMC.40768	d__Bacteria;p__Bacteroidota;c__Bacteroidia;o__Bacteroidales;f__WCHB1-69;g__UBA1756;s__	0	0	0	0	284.461	0	0	0	0	213.662	216.928	239.4	280.48	287.841	262.981	0	0	0
RGMC.40792	d__Bacteria;p__Pseudomonadota;c__Gammaproteobacteria;o__Enterobacterales;f__Enterobacteriaceae;g__Escherichia;s__Escherichia coli	0	0	0	0	0	0	0	0	0	0	0	0	0	132.787	0	0	0	0
RGMC.40795	d__Bacteria;p__Bacteroidota;c__Bacteroidia;o__Bacteroidales;f__Bacteroidaceae;g__UBA3839;s__	898.003	604.894	561.687	726.29	757.88	505.499	781.465	491.294	780.464	1164.4	767.288	917.956	806.622	779.004	818.236	834.481	674.745	674.567
RGMC.40796	d__Bacteria;p__Bacteroidota;c__Bacteroidia;o__Bacteroidales;f__F082;g__Limimorpha;s__	0	0	0	0	0	0	0	0	0	0	0	0	987.782	0	0	0	0	0
RGMC.40811	d__Bacteria;p__Bacteroidota;c__Bacteroidia;o__Bacteroidales;f__Paludibacteraceae;g__RF16;s__	766.984	510.545	622.606	434.964	271.207	417.404	455.57	374.517	852.762	0	0	0	123.832	0	109.135	823.492	396.678	405.785
RGMC.41	d__Bacteria;p__Bacteroidota;c__Bacteroidia;o__Bacteroidales;f__UBA932;g__Cryptobacteroides;s__Cryptobacteroides sp900320545	344.115	259.784	273.382	296.255	288.578	250.596	263.546	259.386	259.781	527.58	478.844	504.095	429.033	453.274	389.823	345.284	279.94	273.841
RGMC.417	d__Bacteria;p__Bacteroidota;c__Bacteroidia;o__Bacteroidales;f__UBA932;g__Cryptobacteroides;s__Cryptobacteroides sp016287875	0	0	127.931	0	0	0	0	0	0	0	0	0	0	0	0	0	0	0
RGMC.420	d__Bacteria;p__Eremiobacterota;c__Xenobia;o__Xenobiales;f__Xenobiaceae;g__;s__	0	0	0	0	228.025	0	0	0	0	513.881	953.447	1124.69	853.903	1036.88	869.69	0	0	0
RGMC.4226	d__Bacteria;p__Spirochaetota;c__Spirochaetia;o__Sphaerochaetales;f__Sphaerochaetaceae;g__UBA9732;s__UBA9732 sp900321635	1202.84	778.949	1245.56	1234	665.657	916.33	1497.65	1082.57	1961.17	477.245	239.31	312.707	402.197	357.366	357.633	1721.1	1007.39	1005.69
RGMC.4233	d__Bacteria;p__Bacteroidota;c__Bacteroidia;o__Bacteroidales;f__Paludibacteraceae;g__RF16;s__RF16 sp900321775	554.689	332.344	376.727	0	0	279.055	241.528	217.349	533.635	0	0	0	0	0	0	426.432	0	0
RGMC.4244	d__Bacteria;p__Bacteroidota;c__Bacteroidia;o__Bacteroidales;f__WCHB1-69;g__UBA1756;s__UBA1756 sp900321845	0	0	0	233.766	507.188	0	506.49	0	0	381.451	326.205	359.609	353.729	360.36	362.606	171.452	379.7	370.563
RGMC.4265	d__Bacteria;p__Bacillota_A;c__Clostridia;o__Oscillospirales;f__Oscillospiraceae;g__Limivicinus;s__Limivicinus sp900317375	0	374.568	352.959	521.954	518.42	376.599	394.248	345.124	0	727.738	727.383	710.859	577.14	607.681	551.197	326.224	494.9	482.274
RGMC.4293	d__Bacteria;p__Bacteroidota;c__Bacteroidia;o__Bacteroidales;f__Bacteroidaceae;g__UBA2918;s__UBA2918 sp900313715	298.415	160.68	200.335	142.223	0	136.287	183.177	0	258.48	0	0	0	0	0	0	200.36	0	0
RGMC.436	d__Bacteria;p__Spirochaetota;c__Spirochaetia;o__Treponematales;f__Treponemataceae;g__Treponema_D;s__Treponema_D sp024691105	455.311	262.977	214.509	749.805	773.658	741.435	802.986	618.117	676.145	0	146.484	0	234.588	256.243	274.981	1008.93	555.472	546.154
RGMC.439	d__Bacteria;p__Bacillota_A;c__Clostridia;o__Lachnospirales;f__Lachnospiraceae;g__JAILNW01;s__JAILNW01 sp024691145	0	0	0	0	293.199	0	319.433	0	0	306.326	0	241.991	280.509	261.005	218.532	0	292.179	287.54
RGMC.458	d__Bacteria;p__Bacillota_A;c__Clostridia;o__Oscillospirales;f__Oscillospiraceae;g__Limivicinus;s__Limivicinus sp024691985	864.359	1211.34	390.961	1329.15	1193.94	1533.77	1190.88	1507.12	730.975	635.551	1182.03	1011.3	851.359	1205.31	1046.52	996.142	1264.61	1254.29
RGMC.468	d__Bacteria;p__Bacteroidota;c__Bacteroidia;o__Bacteroidales;f__P3;g__UBA1217;s__UBA1217 sp902788805	379.517	250.108	0	0	0	284.254	0	198.291	427.118	0	0	0	0	0	0	281.272	0	0
RGMC.47	d__Bacteria;p__Bacteroidota;c__Bacteroidia;o__Bacteroidales;f__BM520;g__RGIG7150;s__RGIG7150 sp016285515	0	0	0	143.643	249.092	0	421.915	0	0	473.476	317.449	312.435	453.396	622.724	302.028	169.465	212.204	216.281
RGMC.492	d__Bacteria;p__Bacillota_A;c__Clostridia;o__Peptostreptococcales;f__Anaerovoracaceae;g__JAILLO01;s__JAILLO01 sp024693105	1030.17	939.28	2424.26	0	0	706.381	0	822.984	890.026	0	0	0	0	0	0	0	0	0
RGMC.500	d__Bacteria;p__Bacteroidota;c__Bacteroidia;o__Bacteroidales;f__Bacteroidaceae;g__Prevotella;s__Prevotella sp900109055	767.792	473.338	455.609	457.571	360.957	490.716	402.206	442.278	801.991	0	120.754	0	164.065	158.278	163.784	846.171	330.69	325.36
RGMC.501	d__Bacteria;p__Bacillota_A;c__Clostridia;o__Lachnospirales;f__Lachnospiraceae;g__ISDg;s__ISDg sp902797475	0	0	0	0	280.53	0	0	0	0	1186.66	686.063	709.088	632.511	661.872	618.975	0	0	191.203
RGMC.5010	d__Bacteria;p__Planctomycetota;c__Planctomycetia;o__Pirellulales;f__Thermoguttaceae;g__RUG695;s__RUG695 sp902766935	0	0	0	0	0	0	0	0	0	170.265	101.174	0	107.166	0	88.6101	0	0	0
RGMC.502	d__Bacteria;p__Bacillota_I;c__Bacilli_A;o__Erysipelotrichales;f__Erysipelotrichaceae;g__Bulleidia;s__Bulleidia sp024693325	0	0	0	0	0	0	0	154.53	0	0	0	0	0	0	0	0	0	0
RGMC.5088	d__Bacteria;p__Bacillota_A;c__Clostridia;o__Lachnospirales;f__Lachnospiraceae;g__AC2028;s__	0	435.346	613.834	0	0	0	0	280.998	0	0	0	0	0	0	0	0	0	0
RGMC.5100	d__Bacteria;p__Bacteroidota;c__Bacteroidia;o__Bacteroidales;f__Bacteroidaceae;g__Ga6A1;s__Ga6A1 sp900102385	299.891	0	0	0	0	0	256.835	0	306.761	0	0	0	0	0	0	0	0	0
RGMC.5116	d__Bacteria;p__Bacteroidota;c__Bacteroidia;o__Bacteroidales;f__Bacteroidaceae;g__Ga6A1;s__Ga6A1 sp900102385	169.868	0	0	0	0	0	204.431	0	180.413	0	0	0	0	0	0	174.26	0	0
RGMC.5130	d__Bacteria;p__Bacteroidota;c__Bacteroidia;o__Bacteroidales;f__Bacteroidaceae;g__Ga6A1;s__Ga6A1 sp900102385	202.556	0	0	0	0	0	216.512	0	212.325	0	0	0	0	0	0	197.286	0	0
RGMC.5132	d__Bacteria;p__Bacteroidota;c__Bacteroidia;o__Bacteroidales;f__Bacteroidaceae;g__Ga6A1;s__Ga6A1 sp900102385	250.569	0	0	0	0	0	231.909	0	251.91	0	0	0	0	0	0	240.204	0	0
RGMC.515	d__Bacteria;p__Bacillota_A;c__Clostridia;o__Lachnospirales;f__Lachnospiraceae;g__RUG11977;s__RUG11977 sp016288005	0	0	0	0	0	0	0	0	0	414.065	0	0	0	0	0	0	0	0
RGMC.518	d__Bacteria;p__Bacillota_A;c__Clostridia;o__Eubacteriales;f__Anaerofustaceae;g__RUG14186;s__RUG14186 sp902796565	0	120.133	131.782	0	0	0	0	0	0	0	0	0	0	0	0	0	0	0
RGMC.5210	d__Bacteria;p__Bacillota_I;c__Bacilli_A;o__RFN20;f__CAG-826;g__UBA3207;s__	0	0	0	810.238	891.506	612.509	852.012	572.363	1134.92	0	0	0	0	0	0	1273.55	0	666.509
RGMC.53	d__Bacteria;p__Bacillota_A;c__Clostridia;o__Christensenellales;f__Christensenellaceae;g__QANA01;s__QANA01 sp017439085	559.873	402.402	168.927	340.895	392.636	376.751	550.481	582.53	495.387	275.993	349.397	378.315	468.588	522.45	361.552	502.423	415.622	412.251
RGMC.533	d__Bacteria;p__Spirochaetota;c__Spirochaetia;o__Treponematales;f__Treponemataceae;g__Treponema_D;s__Treponema_D sp024681195	177.858	0	0	185.56	247.225	168.639	316.372	0	219.964	545.343	206.819	217.635	391.148	428.269	383.676	270.498	204.594	198.075
RGMC.5429	d__Bacteria;p__Bacillota_C;c__Negativicutes;o__Acidaminococcales;f__Acidaminococcaceae;g__Succiniclasticum;s__Succiniclasticum sp017443005	0	0	165.798	0	0	0	0	0	0	0	0	0	0	0	0	0	0	0
RGMC.5433	d__Bacteria;p__Pseudomonadota;c__Gammaproteobacteria;o__Enterobacterales;f__Succinivibrionaceae;g__Ruminobacter;s__Ruminobacter sp002309455	0	457.108	713.508	544.053	415.824	425.772	583.804	377.945	1163.28	0	0	0	0	0	0	0	0	0
RGMC.5465	d__Bacteria;p__Bacteroidota;c__Bacteroidia;o__Bacteroidales;f__Paludibacteraceae;g__UBA1723;s__UBA1723 sp002371265	916.037	596.915	462.958	671.246	634.934	735.674	770.632	783.005	1070.27	307.353	329.181	307.67	586.697	713.04	528.238	1074.51	558.389	547.222
RGMC.548	d__Bacteria;p__Synergistota;c__Synergistia;o__Synergistales;f__Synergistaceae;g__Synergistes;s__Synergistes sp016288355	0	0	0	0	0	0	0	0	0	392.965	215.735	0	0	0	0	0	0	0
RGMC.5498	d__Bacteria;p__Bacillota_A;c__Clostridia;o__Lachnospirales;f__Lachnospiraceae;g__Oribacterium;s__Oribacterium sp002371295	0	1151.07	1365.98	1112.16	1485.18	1357.09	793.849	711.632	0	0	666.193	0	0	0	0	0	914.813	908.764
RGMC.552	d__Bacteria;p__Planctomycetota;c__Planctomycetia;o__Pirellulales;f__Thermoguttaceae;g__RUG695;s__RUG695 sp902766935	0	0	0	0	110.14	0	104.31	0	0	192.876	123.703	115.741	126.151	124.11	103.018	0	0	83.3115
RGMC.557	d__Bacteria;p__Bacillota_A;c__Clostridia;o__Lachnospirales;f__Lachnospiraceae;g__XBB1006;s__XBB1006 sp016283755	241.969	0	0	542.759	335.267	413.807	786.524	409.276	327.824	0	0	0	0	0	0	714.716	554.767	566.754
RGMC.5594	d__Bacteria;p__Spirochaetota;c__Spirochaetia;o__Sphaerochaetales;f__Sphaerochaetaceae;g__RUG14846;s__	0	0	0	119.828	0	0	190.669	103.612	185.502	0	0	0	0	0	0	145.774	0	0
RGMC.570	d__Bacteria;p__Bacillota_I;c__Bacilli_A;o__RFN20;f__CAG-826;g__RGIG9670;s__RGIG9670 sp024695405	613.192	309.986	0	567.491	681.334	601.746	883.481	646.31	685.477	357.134	260.539	254.092	505.082	549.327	505.618	976.909	599.725	598.557
RGMC.5727	d__Bacteria;p__Bacillota_C;c__Negativicutes;o__Selenomonadales;f__Selenomonadaceae;g__Anaerovibrio;s__Anaerovibrio lipolyticus	1464.57	769.293	788.844	0	0	0	0	0	831.394	0	0	0	0	0	0	0	0	0
RGMC.5756	d__Bacteria;p__Bacteroidota;c__Bacteroidia;o__Bacteroidales;f__UBA932;g__Cryptobacteroides;s__Cryptobacteroides sp017429205	230.26	176.332	0	0	0	0	0	168.684	0	365.539	278.361	271.995	246.89	286.322	227.71	0	188.85	191.818
RGMC.5783	d__Bacteria;p__Bacillota_C;c__Negativicutes;o__Acidaminococcales;f__Acidaminococcaceae;g__Succiniclasticum;s__Succiniclasticum sp017443005	192.922	186.11	242.312	161.375	0	0	0	140.01	0	0	0	0	0	0	0	0	0	0
RGMC.5830	d__Bacteria;p__Pseudomonadota;c__Gammaproteobacteria;o__Enterobacterales;f__Succinivibrionaceae;g__Ruminobacter;s__Ruminobacter amylophilus	0	0	0	0	0	0	0	0	731.354	0	0	0	0	0	0	0	0	0
RGMC.5844	d__Bacteria;p__Spirochaetota;c__Spirochaetia;o__Treponematales;f__Treponemataceae;g__Treponema_D;s__	0	0	0	0	0	0	0	0	0	0	181.986	0	0	0	0	0	0	0
RGMC.5868	d__Bacteria;p__Bacillota_A;c__Clostridia;o__Oscillospirales;f__Oscillospiraceae;g__Faecousia;s__	0	0	0	712.771	1541.53	218.321	1373.99	123.084	0	638.644	951.321	963.389	1148.17	1196.24	825.923	293.854	1199.08	1199.71
RGMC.5888	d__Bacteria;p__Bacillota_A;c__Clostridia;o__Lachnospirales;f__Lachnospiraceae;g__RUG11977;s__RUG11977 sp017427415	0	0	0	0	0	0	0	0	0	840.867	498.494	601.912	906.206	1086.08	824.177	0	0	0
RGMC.5899	d__Bacteria;p__Bacillota_A;c__Clostridia;o__Lachnospirales;f__Lachnospiraceae;g__UBA1258;s__UBA1258 sp024687305	635.692	840.173	981	624.814	436.482	718.866	482.795	785.132	757.881	0	0	0	0	0	0	625.892	412.391	413.667
RGMC.590	d__Bacteria;p__Bacillota_A;c__Clostridia;o__Lachnospirales;f__Lachnospiraceae;g__UBA1712;s__UBA1712 sp902789785	1284.75	935.663	704.315	816.17	570.719	852.579	775.212	957.759	1308.33	0	0	0	0	0	0	1027.81	490.916	498.832
RGMC.591	d__Bacteria;p__Bacteroidota;c__Bacteroidia;o__Bacteroidales;f__Paludibacteraceae;g__UBA1723;s__UBA1723 sp002371265	700.558	450.633	352.738	505.992	475.207	548.717	581.259	603.848	795.116	235.005	243.503	235.814	438.269	525.582	395.493	815.345	425.891	416.148
RGMC.5910	d__Bacteria;p__Bacillota_A;c__Clostridia;o__Peptostreptococcales;f__Anaerovoracaceae;g__UBA3871;s__UBA3871 sp002392265	500.328	320.203	152.819	445.646	486.579	419.222	671.009	453.428	480.21	601.082	352.845	416.863	560.696	575.521	403.535	580.172	609.648	604.84
RGMC.5944	d__Bacteria;p__Bacteroidota;c__Bacteroidia;o__Bacteroidales;f__Bacteroidaceae;g__Ga6A1;s__Ga6A1 sp900102385	292.119	0	0	0	0	0	274.221	0	324.262	0	0	0	0	0	0	279.945	0	0
RGMC.595	d__Bacteria;p__Bacillota_A;c__Clostridia;o__Peptostreptococcales;f__Anaerovoracaceae;g__Eubacterium_B;s__Eubacterium_B sp017515765	0	0	164.959	0	0	0	0	0	0	0	0	0	0	0	0	0	0	0
RGMC.5999	d__Bacteria;p__Bacillota_A;c__Clostridia;o__Peptostreptococcales;f__Anaerovoracaceae;g__JABZIP01;s__	0	0	234.034	0	0	0	0	0	0	0	0	0	0	0	0	0	0	0
RGMC.6	d__Bacteria;p__Bacillota_A;c__Clostridia;o__Lachnospirales;f__Lachnospiraceae;g__JAEEOQ01;s__JAEEOQ01 sp016284355	541.235	395.82	262.818	373.274	350.554	430.818	489.24	457.473	615.188	0	0	0	218.825	211.16	181.939	588.524	277.873	281.768
RGMC.60	d__Bacteria;p__Bacillota_A;c__Clostridia;o__Lachnospirales;f__Lachnospiraceae;g__ISDg;s__ISDg sp902797475	0	0	0	0	705.808	0	626.094	0	0	2505.7	1501.56	1580.25	1553.96	1626.03	1508.28	0	498.646	494.03
RGMC.600	d__Bacteria;p__Desulfobacterota;c__Desulfuromonadia;o__Desulfuromonadales;f__JAAYDE01;g__RGIG7977;s__RGIG7977 sp017417085	0	0	0	318.328	347.215	235.867	377.468	0	0	437.223	409.114	405.481	0	427.238	351.238	0	391.949	398.132
RGMC.602	d__Bacteria;p__Bacillota_I;c__Bacilli_A;o__Erysipelotrichales;f__Erysipelotrichaceae;g__Bulleidia;s__Bulleidia sp024696355	296.235	304.041	192.44	502.153	392.257	441.55	479.098	415.441	343.29	751.686	498.63	541.42	443.897	466.643	490.535	454.77	547.372	543.496
RGMC.6174	d__Bacteria;p__Fibrobacterota;c__Fibrobacteria;o__Fibrobacterales;f__Fibrobacteraceae;g__Fibrobacter;s__Fibrobacter sp017520105	1093.1	727.664	699.656	592.864	513.446	704.645	520.423	671.479	1183.43	286.446	225.042	229.421	348.571	364.235	326.034	968.533	432.205	431.446
RGMC.62	d__Bacteria;p__Bacillota_A;c__Clostridia;o__Oscillospirales;f__QAMX01;g__SIG499;s__SIG499 sp016285815	0	0	0	0	0	0	0	0	0	405.328	172.893	163.761	137.203	165.31	118.003	0	0	0
RGMC.6261	d__Bacteria;p__Spirochaetota;c__Spirochaetia;o__Treponematales;f__Treponemataceae;g__Treponema_D;s__	491.918	308.224	249.53	284.049	300.18	286.389	377.743	401.873	403.325	390.796	414.381	456.768	786.11	735.054	685.115	482.626	467.153	461.922
RGMC.6271	d__Bacteria;p__Bacteroidota;c__Bacteroidia;o__Bacteroidales;f__Paludibacteraceae;g__UBA1723;s__UBA1723 sp002392915	440.797	292.121	0	322.702	322.376	355.873	395.493	400.118	521.654	0	0	0	306.87	374.89	272.214	534.154	277.924	280.754
RGMC.629	d__Bacteria;p__Desulfobacterota;c__Desulfovibrionia;o__Desulfovibrionales;f__Desulfovibrionaceae;g__Desulfovibrio;s__Desulfovibrio sp016284885	245.974	199.126	0	406.167	536.022	369.407	583	424.192	242.463	656.025	737.997	625.454	666.8	803.278	588.92	321.183	366.356	370.462
RGMC.65	d__Bacteria;p__Bacteroidota;c__Bacteroidia;o__Bacteroidales;f__Paludibacteraceae;g__UBA1181;s__UBA1181 sp016285885	0	0	0	0	0	0	0	0	0	458.053	0	0	0	0	0	0	0	0
RGMC.6517	d__Bacteria;p__Spirochaetota;c__Spirochaetia;o__Sphaerochaetales;f__Sphaerochaetaceae;g__RUG14846;s__RUG14846 sp947306375	187.259	192.889	303.02	335.482	233.718	267.924	430.181	262.604	517.1	299.294	0	0	201.508	0	208.707	398.679	272.575	257.806
RGMC.653	d__Bacteria;p__Bacteroidota;c__Bacteroidia;o__Bacteroidales;f__Bacteroidaceae;g__UBA4372;s__UBA4372 sp024697945	551.389	271.64	184.841	391.385	377.215	287.675	392.23	228.408	425.612	389.82	357.722	398.098	542.418	484.077	522.232	565.04	347.215	342.358
RGMC.6726	d__Bacteria;p__Bacteroidota;c__Bacteroidia;o__Bacteroidales;f__Paludibacteraceae;g__UBA1723;s__UBA1723 sp002371265	2266.17	1545.47	1220.11	1780.32	1779.29	2004.31	2256.05	2379	2843.46	855.898	931.546	875.391	1702.7	2197.21	1494.86	2758.58	1470.89	1468.04
RGMC.676	d__Bacteria;p__Bacteroidota;c__Bacteroidia;o__Bacteroidales;f__UBA932;g__RUG11257;s__RUG11257 sp017527625	285.35	179.442	204.861	0	0	0	0	0	278.736	0	0	0	0	0	0	210.764	0	0
RGMC.6824	d__Bacteria;p__Spirochaetota;c__Spirochaetia;o__Treponematales;f__Treponemataceae;g__Treponema_D;s__Treponema_D sp946540605	1012.04	721.486	719.429	731.165	736.492	892.293	740.504	884.231	1298.55	0	195.296	208.209	362.33	459.085	405.023	1073.9	445.408	442.02
RGMC.688	d__Bacteria;p__Bacteroidota;c__Bacteroidia;o__Bacteroidales;f__Bacteroidaceae;g__UBA4372;s__UBA4372 sp024698925	1430.8	921.593	906.358	884.582	658.294	876.928	801.055	848.617	1532.67	201.634	212.055	225.405	328.185	284.178	344.352	1140.32	551.174	546.517
RGMC.692	d__Bacteria;p__Bacteroidota;c__Bacteroidia;o__Bacteroidales;f__Paludibacteraceae;g__UBA4363;s__UBA4363 sp017446585	0	0	0	0	0	0	0	0	127.821	0	0	0	0	0	0	0	0	0
RGMC.6921	d__Bacteria;p__Spirochaetota;c__Spirochaetia;o__Treponematales;f__Treponemataceae;g__Treponema_D;s__	0	0	0	0	0	0	0	0	0	0	129.199	0	0	0	0	0	0	0
RGMC.6973	d__Bacteria;p__Bacteroidota;c__Bacteroidia;o__Bacteroidales;f__Bacteroidaceae;g__Ga6A1;s__Ga6A1 sp900102385	0	0	0	0	0	0	230.671	0	0	0	0	0	0	0	0	0	0	0
RGMC.70	d__Bacteria;p__Bacteroidota;c__Bacteroidia;o__Bacteroidales;f__UBA932;g__Cryptobacteroides;s__Cryptobacteroides sp902782225	881.139	534.67	669.392	534.202	360.874	481.591	400.787	345.98	720.403	356.416	245.807	241.552	256.006	199.046	274.089	758.588	412.81	402.713
RGMC.708	d__Bacteria;p__Bacteroidota;c__Bacteroidia;o__Bacteroidales;f__UBA4181;g__UBA4181;s__UBA4181 sp017523725	398.512	213.212	225.978	232.773	186.939	184.47	274.226	237.989	359.491	208.401	158.464	0	187.389	0	168.876	390.839	204.601	205.896
RGMC.71	d__Bacteria;p__Bacillota_A;c__Clostridia;o__Lachnospirales;f__Lachnospiraceae;g__UBA1201;s__UBA1201 sp002309675	0	170.216	173.228	0	0	155.633	0	188.555	0	0	0	0	0	0	0	0	126.685	125.165
RGMC.7104	d__Bacteria;p__Spirochaetota;c__Spirochaetia;o__Treponematales;f__Treponemataceae;g__Treponema_D;s__Treponema_D sp902789325	1306.03	921.54	924.18	921.83	879.083	1108.87	849.76	1020.21	1743.5	0	242.717	0	418.244	499.286	491.834	1348.55	559.191	556.016
RGMC.713	d__Bacteria;p__Bacteroidota;c__Bacteroidia;o__Bacteroidales;f__P3;g__UBA1711;s__UBA1711 sp902803395	0	0	0	0	139.078	0	129.946	0	0	244.359	0	0	157.332	132.778	147.243	0	115.055	120.535
RGMC.722	d__Bacteria;p__Bacteroidota;c__Bacteroidia;o__Bacteroidales;f__UBA932;g__Cryptobacteroides;s__Cryptobacteroides sp902761655	0	0	0	0	0	0	0	0	0	0	0	0	0	0	211.904	0	0	0
RGMC.7288	d__Bacteria;p__Bacteroidota;c__Bacteroidia;o__Bacteroidales;f__UBA932;g__Bact-11;s__Bact-11 sp002361615	0	0	154.649	173	160.496	155.842	187.894	165.984	0	249.8	191.37	183.304	189.408	203.965	170.858	0	178.519	173.524
RGMC.732	d__Bacteria;p__Elusimicrobiota;c__Elusimicrobia;o__Elusimicrobiales;f__UBA9959;g__CACZRG01;s__CACZRG01 sp024681855	0	0	0	0	0	0	0	0	0	2014.77	301.678	349.822	692.724	505.351	413.267	0	0	0
RGMC.733	d__Bacteria;p__Bacillota_A;c__Clostridia;o__Lachnospirales;f__Lachnospiraceae;g__CAG-411;s__CAG-411 sp902795895	0	0	0	212.626	0	0	0	0	0	0	627.114	0	0	0	0	0	0	0
RGMC.736	d__Bacteria;p__Bacillota_A;c__Clostridia;o__Peptostreptococcales;f__Anaerovoracaceae;g__RUG11894;s__RUG11894 sp024682015	290.338	419.393	683.249	396.563	377.667	424.68	432.171	506.761	250.005	517.68	395.955	395.362	443.127	462.424	389.612	291.793	428.725	425.68
RGMC.738	d__Bacteria;p__Spirochaetota;c__Spirochaetia;o__Treponematales;f__Treponemataceae;g__Treponema_D;s__Treponema_D sp024680155	449.056	279.803	275.638	596.852	1096.71	569.049	818.941	476.452	661.892	0	350.709	428.978	468.301	1396.07	341.154	567.156	484.214	481.724
RGMC.743	d__Bacteria;p__Bacillota_A;c__Clostridia;o__Lachnospirales;f__Lachnospiraceae;g__JAEEOQ01;s__JAEEOQ01 sp016284355	1028.82	658.157	412.988	631.372	484.606	632.245	562.488	507.958	977.2	0	0	0	292.21	226.145	275.321	1051.21	442.529	443.319
RGMC.7461	d__Bacteria;p__Bacillota_A;c__Clostridia;o__Oscillospirales;f__Oscillospiraceae;g__Limivicinus;s__	556.436	1018.35	700.003	1260.9	1212.01	1004.14	943.634	849.939	464.834	1072.37	1555.5	1575.45	1153.73	1208.68	1155.24	806.459	1052.64	1049.25
RGMC.748	d__Bacteria;p__Bacteroidota;c__Bacteroidia;o__Bacteroidales;f__Bacteroidaceae;g__UBA1786;s__UBA1786 sp024682395	393.256	190.393	117.165	161.265	197.348	199.233	618.07	260.031	327.626	439.433	204.527	283.832	376.127	466.669	340.029	325.413	234.396	237.417
RGMC.7560	d__Bacteria;p__Bacteroidota;c__Bacteroidia;o__Bacteroidales;f__Paludibacteraceae;g__UBA1723;s__UBA1723 sp002371265	1776.42	1206.12	946.659	1413.83	1412.17	1621.25	1804.36	1880.96	2306.99	690.652	742.513	689.846	1383.96	1764.46	1206.13	2194.41	1175.38	1183.64
RGMC.7561	d__Bacteria;p__Bacillota_C;c__Negativicutes;o__Acidaminococcales;f__Acidaminococcaceae;g__Succiniclasticum;s__Succiniclasticum sp017443005	158.001	152.195	208.997	136.74	0	0	0	122.09	0	0	0	0	0	0	0	0	136.903	137.478
RGMC.7576	d__Bacteria;p__Bacteroidota;c__Bacteroidia;o__Bacteroidales;f__Paludibacteraceae;g__UBA1723;s__UBA1723 sp002371265	701.437	471.544	418.895	525.914	558.685	575.873	744.144	787.194	801.295	256.061	343.021	310.864	579.181	791.048	433.969	1107.33	506.369	501.579
RGMC.765	d__Bacteria;p__Bacteroidota;c__Bacteroidia;o__Bacteroidales;f__Bacteroidaceae;g__Ga6A1;s__Ga6A1 sp900102385	0	0	0	0	0	0	199.518	0	0	0	0	0	0	0	0	0	0	0
RGMC.7652	d__Bacteria;p__Bacteroidota;c__Bacteroidia;o__Bacteroidales;f__Paludibacteraceae;g__UBA1723;s__UBA1723 sp002371265	1202.63	780.398	611.683	897.757	854.189	987.77	1073.4	1099.22	1426.8	409.079	447.492	423.268	801.767	1012.72	728.764	1419.32	744.308	732.41
RGMC.7684	d__Bacteria;p__Pseudomonadota;c__Gammaproteobacteria;o__Enterobacterales;f__Enterobacteriaceae;g__Escherichia;s__Escherichia coli	0	0	0	0	0	0	0	0	0	0	0	0	0	503.508	0	0	0	0
RGMC.769	d__Bacteria;p__Bacillota_A;c__Clostridia;o__Lachnospirales;f__Lachnospiraceae;g__Bilifractor;s__Bilifractor sp024683035	0	265.136	206.396	350.019	0	385.687	0	386.757	0	1197.83	716.252	799.01	633.999	589.179	658.472	0	503.139	483.691
RGMC.772	d__Bacteria;p__Bacteroidota;c__Bacteroidia;o__Bacteroidales;f__UBA932;g__Cryptobacteroides;s__Cryptobacteroides sp900316245	122.196	0	114.908	0	0	0	0	0	0	0	0	0	0	0	0	0	0	0
RGMC.7773	d__Bacteria;p__Spirochaetota;c__Spirochaetia;o__Treponematales;f__Treponemataceae;g__UBA1240;s__UBA1240 sp001603145	0	0	0	0	0	128.9	0	0	0	0	0	0	0	0	0	177.88	0	0
RGMC.791	d__Bacteria;p__Bacillota_A;c__Clostridia;o__Lachnospirales;f__Lachnospiraceae;g__UBA1258;s__UBA1258 sp900100895	283.382	370.006	369.297	433.869	600.728	350.028	402.942	345.646	346.337	0	256.417	0	0	231.926	279.945	337.019	276.143	270.131
RGMC.7911	d__Bacteria;p__Bacteroidota;c__Bacteroidia;o__Bacteroidales;f__Paludibacteraceae;g__UBA1723;s__UBA1723 sp002392915	474.762	314.942	0	350.243	332.789	377.901	415.059	423.644	541.478	0	0	0	313.556	380.473	273.196	576.151	296.157	294.678
RGMC.794	d__Bacteria;p__Bacillota_A;c__Clostridia;o__Oscillospirales;f__Oscillospiraceae;g__Limivicinus;s__Limivicinus sp024685535	0	287.094	230.733	295.215	240.36	336.828	220.027	338.856	0	293.831	288.85	292.742	241.818	271.858	244.22	188.157	280.877	272.377
RGMC.795	d__Bacteria;p__Bacillota_A;c__Clostridia;o__Eubacteriales;f__Anaerofustaceae;g__JAAYHF01;s__JAAYHF01 sp024685545	0	0	0	0	124.767	92.3307	108.676	97.8396	0	543.46	329.35	355.194	333.619	302.354	282.829	0	119.998	123.307
RGMC.8014	d__Bacteria;p__Fibrobacterota;c__Fibrobacteria;o__Fibrobacterales;f__Fibrobacteraceae;g__Fibrobacter;s__Fibrobacter succinogenes_P	1694.87	1054.73	1108.93	790.679	827.015	738.157	1142.28	1071.41	1386.86	1278.57	693.717	785.95	1096.24	1413.99	824.875	1701.05	952.149	937.655
RGMC.810	d__Bacteria;p__Bacillota_A;c__Clostridia;o__Lachnospirales;f__Lachnospiraceae;g__Butyrivibrio;s__Butyrivibrio sp024687125	2797.38	1852.51	1934.37	1597.04	1138.03	1242.89	1358.1	977.21	2051.24	577.067	567.923	797.589	699.316	528.688	744.695	2708.32	1422.87	1377.2
RGMC.8143	d__Bacteria;p__Verrucomicrobiota;c__Lentisphaeria;o__Victivallales;f__UBA1829;g__UBA1732;s__UBA1732 sp017524965	627.721	385.59	150.349	374.433	312.438	354.77	378.902	322.09	579.806	288.548	142.964	164.724	270.194	243.386	229.21	381.262	264.036	259.753
RGMC.8259	d__Bacteria;p__Bacillota_A;c__Clostridia;o__Lachnospirales;f__Lachnospiraceae;g__XBB1006;s__XBB1006 sp016283755	781.677	172.419	0	1769.95	1117.99	1424.19	2856.47	1586.92	1105.88	172.348	162.857	203.172	346.569	418.423	257.069	2275.75	1695.26	1706.78
RGMC.8339	d__Bacteria;p__Bacillota_C;c__Negativicutes;o__Selenomonadales;f__Selenomonadaceae;g__Anaerovibrio;s__Anaerovibrio lipolyticus	1319.63	714.147	755.43	0	0	0	0	0	765.466	0	0	0	0	0	0	0	0	0
RGMC.843	d__Archaea;p__Methanobacteriota;c__Methanobacteria;o__Methanobacteriales;f__Methanobacteriaceae;g__Methanobrevibacter;s__Methanobrevibacter sp902784195	0	309.871	0	604.636	683.635	1077.07	1184.9	2122.03	267.38	491.727	728.381	677.552	872.903	1189.06	459.586	656.088	922.333	916.88
RGMC.8473	d__Bacteria;p__Bacillota_C;c__Negativicutes;o__Selenomonadales;f__Selenomonadaceae;g__Anaerovibrio;s__Anaerovibrio sp902785445	0	1582.75	2035.91	0	0	0	0	0	0	0	0	0	0	0	0	0	0	0
RGMC.8533	d__Bacteria;p__Bacillota_A;c__Clostridia;o__Lachnospirales;f__Lachnospiraceae;g__Moryella;s__Moryella sp902780465	0	2367.31	2163.76	2823.58	2978.21	2559.8	2486.41	3175.63	0	0	1710.37	0	1470.25	0	1715.18	0	2358.11	2295.17
RGMC.8565	d__Bacteria;p__Bacillota_C;c__Negativicutes;o__Selenomonadales;f__Selenomonadaceae;g__Anaerovibrio;s__Anaerovibrio lipolyticus	431.917	335.576	562.18	0	0	0	0	0	381.688	0	0	0	0	0	0	0	0	0
RGMC.8614	d__Bacteria;p__Bacillota_A;c__Clostridia;o__Peptostreptococcales;f__Anaerovoracaceae;g__Lentihominibacter;s__Lentihominibacter sp017404365	0	271.745	256.939	317.543	360.8	357.609	355.9	457.979	0	518.724	558.688	562.229	526.858	611.193	488.073	0	421.946	419.144
RGMC.8668	d__Archaea;p__Methanobacteriota;c__Methanobacteria;o__Methanobacteriales;f__Methanobacteriaceae;g__Methanobrevibacter;s__Methanobrevibacter sp902784195	0	0	0	0	0	634.483	0	821.713	0	0	0	0	0	0	0	0	0	0
RGMC.869	d__Bacteria;p__Bacteroidota;c__Bacteroidia;o__Bacteroidales;f__Bacteroidaceae;g__Ga6A1;s__Ga6A1 sp900102385	145.34	0	0	0	0	0	205.632	0	161.382	0	0	0	0	0	0	148.716	0	0
RGMC.87	d__Bacteria;p__Chloroflexota;c__Dehalococcoidia;o__Dehalococcoidales;f__UBA1222;g__UBA1222;s__UBA1222 sp016286345	242.588	97.1888	0	190.27	240.364	151.134	395.171	204.755	250.438	384.889	260.996	268.13	340.47	408.415	299.076	305.634	218.113	216.517
RGMC.8709	d__Bacteria;p__Bacteroidota;c__Bacteroidia;o__Bacteroidales;f__WCHB1-69;g__RUG11690;s__RUG11690 sp902771655	8133.53	5256.53	3280.33	3709.71	2123.44	4827.36	4058.13	6329.72	7544.17	1249.74	847.629	863.12	1464.09	1698.47	1167.5	6765.3	2872.3	2869.1
RGMC.8716	d__Bacteria;p__Bacillota_C;c__Negativicutes;o__Acidaminococcales;f__Acidaminococcaceae;g__Succiniclasticum;s__Succiniclasticum sp017443005	0	145.333	187.983	0	0	0	0	0	0	0	0	0	0	0	0	0	0	0
RGMC.8807	d__Bacteria;p__Verrucomicrobiota;c__Kiritimatiellia;o__RFP12;f__UBA1067;g__UBA1067;s__	0	0	109.141	0	0	0	0	0	139.83	0	0	0	0	0	0	0	0	0
RGMC.8814	d__Bacteria;p__Bacteroidota;c__Bacteroidia;o__Bacteroidales;f__Bacteroidaceae;g__UBA1179;s__	509.503	328.207	472.178	0	0	272.841	0	286.204	596.12	0	0	0	0	0	0	375.223	0	0
RGMC.8848	d__Bacteria;p__Bacteroidota;c__Bacteroidia;o__Bacteroidales;f__WCHB1-69;g__RUG11690;s__RUG11690 sp902771655	4673.96	2756.45	1782.88	1879.79	1008.41	2165.87	1527.47	2196.32	3792.93	659.164	428.273	451.138	649.712	654.845	586.438	3445.52	1481.21	1474.6
RGMC.8968	d__Bacteria;p__Bacteroidota;c__Bacteroidia;o__Bacteroidales;f__Paludibacteraceae;g__UBA1181;s__UBA1181 sp016285885	0	0	0	0	0	0	0	0	0	444.137	0	0	0	0	0	0	0	0
RGMC.8994	d__Bacteria;p__Bacteroidota;c__Bacteroidia;o__Bacteroidales;f__Bacteroidaceae;g__UBA1179;s__UBA1179 sp902779875	406.61	295.529	289.678	270.466	174.728	303.571	275.197	344.118	517.74	0	0	0	140.964	140.097	126.334	449.882	196.919	202.93
RGMC.9010	d__Bacteria;p__Bacteroidota;c__Bacteroidia;o__Bacteroidales;f__UBA932;g__Bact-11;s__Bact-11 sp002361615	0	0	0	0	0	0	0	0	0	149.447	0	0	0	0	0	0	0	0
RGMC.9025	d__Bacteria;p__Bacteroidota;c__Bacteroidia;o__Bacteroidales;f__Bacteroidaceae;g__Prevotella;s__Prevotella sp946188395	355.045	174.452	200.353	157.522	141.023	155.114	160.328	143.19	288.528	160.605	117.889	0	138.28	0	125.326	256.084	130.911	126.637
RGMC.906	d__Bacteria;p__Bacteroidota;c__Bacteroidia;o__Bacteroidales;f__UBA932;g__Cryptobacteroides;s__Cryptobacteroides sp900316955	565.197	330.036	313.365	341.733	288.191	299.917	294.222	292.103	397.828	387.102	346.109	366.647	334	336.413	321.537	453.412	321.62	325.628
RGMC.9091	d__Bacteria;p__Bacteroidota;c__Bacteroidia;o__Bacteroidales;f__Bacteroidaceae;g__Prevotella;s__Prevotella sp902801155	268.567	191.938	0	217.198	224.594	275.503	313.152	237.222	334.138	0	0	182.034	242.238	202.861	228.174	461.846	269.704	268.446
RGMC.91	d__Archaea;p__Methanobacteriota;c__Methanobacteria;o__Methanobacteriales;f__Methanobacteriaceae;g__Methanobrevibacter;s__Methanobrevibacter sp016291275	14583.5	7109.93	0	8418.24	7652.12	8624.66	6932.84	7951.6	12327.1	3756.57	5244.34	6516.04	7366.81	6953.73	7743.52	14634.5	9815.89	9522.73
RGMC.9172	d__Bacteria;p__Spirochaetota;c__Spirochaetia;o__Treponematales;f__Treponemataceae;g__Treponema_D;s__Treponema_D sp902797305	120.672	0	0	0	0	0	0	0	127.798	0	0	0	0	0	0	0	0	0
RGMC.9227	d__Bacteria;p__Bacillota_C;c__Negativicutes;o__Acidaminococcales;f__Acidaminococcaceae;g__Succiniclasticum;s__Succiniclasticum sp017443005	158.884	138.09	190.468	121.361	0	102.944	0	117.066	124.709	0	0	0	0	0	0	0	94.0853	93.8386
RGMC.9235	d__Bacteria;p__Spirochaetota;c__Spirochaetia;o__Treponematales;f__Treponemataceae;g__Treponema_D;s__	1393.19	923.528	976.779	922.723	854.756	1138.58	943.543	1107.83	1747.24	263.848	266.251	258.891	474.959	548.477	514.034	1394.43	568.787	569.967
RGMC.9242	d__Bacteria;p__Bacillota_A;c__Clostridia;o__Peptostreptococcales;f__Anaerovoracaceae;g__UBA3871;s__UBA3871 sp002392265	602.792	387.903	0	532.031	555.99	514.191	794.846	557.482	594.192	865.289	465.704	562.314	730.697	777.609	548.866	671.948	694.358	696.741
RGMC.9243	d__Bacteria;p__Verrucomicrobiota;c__Lentisphaeria;o__Victivallales;f__UBA1829;g__UBA1732;s__UBA1732 sp017540385	0	0	0	0	131.86	0	149.222	0	120.875	237.06	0	119.944	220.021	188.671	162.661	141.449	0	0
RGMC.9311	d__Bacteria;p__Bacteroidota;c__Bacteroidia;o__Bacteroidales;f__Bacteroidaceae;g__Prevotella;s__Prevotella sp946188395	336.735	168.058	192.908	150.026	0	144.086	149.304	132.771	268.686	147.037	108.445	0	130.212	0	114.311	242.395	0	122.92
RGMC.9349	d__Bacteria;p__Bacteroidota;c__Bacteroidia;o__Bacteroidales;f__UBA932;g__Cryptobacteroides;s__Cryptobacteroides sp016287875	135.379	111.829	176.757	0	0	0	0	0	0	0	0	0	0	0	0	0	0	0
RGMC.9361	d__Bacteria;p__Bacteroidota;c__Bacteroidia;o__Bacteroidales;f__UBA932;g__Bact-11;s__Bact-11 sp002361615	0	0	0	0	0	0	147.55	0	0	185.395	145.703	0	139.451	163.102	124.724	0	126.912	126.225
RGMC.9363	d__Bacteria;p__Bacteroidota;c__Bacteroidia;o__Bacteroidales;f__Bacteroidaceae;g__UBA1179;s__UBA1179 sp017530735	604.022	417.628	578.481	279.306	189.3	322.947	333.273	365.018	637.53	308.414	153.205	131.258	216.378	239.162	196.286	573.476	219.372	215.127
RGMC.9372	d__Bacteria;p__Bacteroidota;c__Bacteroidia;o__Bacteroidales;f__SZUA-534;g__RUG13583;s__RUG13583 sp946404125	201.294	150.489	157.022	0	0	0	0	0	229.737	0	0	0	0	0	0	198.699	0	0
RGMC.938	d__Bacteria;p__Bacillota_A;c__Clostridia;o__Oscillospirales;f__Oscillospiraceae;g__Limivicinus;s__Limivicinus sp900317375	0	375.414	362.527	520.074	523.069	392.8	393.79	360.567	0	832.164	743.546	762.577	579.817	618.565	568.787	325.812	558.812	549.562
RGMC.9419	d__Bacteria;p__Bacteroidota;c__Bacteroidia;o__Bacteroidales;f__WCHB1-69;g__JAFTCA01;s__	125.005	0	0	153.133	162.262	112.179	186.88	0	142.482	363.355	241.729	270.707	264.681	275.266	271.576	214.632	166.43	164.023
RGMC.9446	d__Bacteria;p__Bacteroidota;c__Bacteroidia;o__Bacteroidales;f__UBA932;g__Cryptobacteroides;s__Cryptobacteroides sp900319375	131.644	91.6525	96.8447	0	0	0	0	0	146.686	0	0	0	0	0	0	126.151	0	0
RGMC.9455	d__Bacteria;p__Bacillota_A;c__Clostridia;o__Peptostreptococcales;f__Anaerovoracaceae;g__UBA3871;s__UBA3871 sp002392265	590.834	381.6	0	545.841	590.38	506.591	752.01	533.414	588.571	888.792	470.072	593.649	703.173	745.505	564.483	700.34	719.363	726.438
RGMC.9457	d__Bacteria;p__Bacteroidota;c__Bacteroidia;o__Bacteroidales;f__Bacteroidaceae;g__Ga6A1;s__Ga6A1 sp900102385	0	0	0	0	0	0	266.187	0	0	0	0	0	0	0	0	0	0	0
RGMC.9460	d__Bacteria;p__Bacillota_A;c__Clostridia;o__Peptostreptococcales;f__Anaerovoracaceae;g__UBA3871;s__UBA3871 sp002392265	825.143	529.751	0	745.006	840.191	720.356	1398.17	921.71	848.488	946.624	577.549	662.219	1009.16	1157.06	686.786	1031.46	975.739	956.182
RGMC.9461	d__Bacteria;p__Bacteroidota;c__Bacteroidia;o__Bacteroidales;f__Bacteroidaceae;g__UBA4334;s__UBA4334 sp017450985	790.513	519.348	560.559	613.87	436.009	929.737	1201.72	630.492	869.464	0	258.103	175.874	325.246	287.796	204.339	1120.71	410.25	410.35
RGMC.9465	d__Bacteria;p__Bacteroidota;c__Bacteroidia;o__Bacteroidales;f__Bacteroidaceae;g__Prevotella;s__Prevotella sp902801155	289.777	201.861	0	232.89	230.211	281.966	325.39	237.397	345.05	0	0	192.982	247.76	208.925	238.978	500.838	284.156	281.113
RGMC.95	d__Bacteria;p__Bacteroidota;c__Bacteroidia;o__Bacteroidales;f__Bacteroidaceae;g__Prevotella;s__Prevotella sp016286575	488.965	315.415	455.161	327.983	0	409.406	1016.61	1393.09	391.83	0	0	0	0	0	0	749.335	0	0
RGMC.9521	d__Bacteria;p__Spirochaetota;c__Spirochaetia;o__Treponematales;f__Treponemataceae;g__UBA1240;s__UBA1240 sp001603145	0	0	0	0	0	205.301	0	0	0	230.752	0	0	0	0	182.04	274.484	0	0
RGMC.9556	d__Bacteria;p__Bacteroidota;c__Bacteroidia;o__Bacteroidales;f__F082;g__Limimorpha;s__Limimorpha sp902801465	0	0	0	185.792	0	129.345	175.915	0	0	0	0	0	0	0	0	253.138	163.482	159.985
RGMC.9566	d__Bacteria;p__Fibrobacterota;c__Fibrobacteria;o__Fibrobacterales;f__Fibrobacteraceae;g__Fibrobacter;s__Fibrobacter sp946405515	722.536	395.939	351.735	292.299	353.796	267.241	497.2	345.961	545.697	532.898	294	336.58	455.919	466.987	349.076	558.021	414.017	412.403
RGMC.9582	d__Bacteria;p__Bacillota_C;c__Negativicutes;o__Selenomonadales;f__Selenomonadaceae;g__Anaerovibrio;s__Anaerovibrio lipolyticus	403.332	301.433	507.581	0	0	0	0	230.616	334.077	0	0	0	0	0	0	0	0	0
RGMC.96	d__Bacteria;p__Bacteroidota;c__Bacteroidia;o__Bacteroidales;f__Bacteroidaceae;g__Prevotella;s__Prevotella sp016286585	7024.49	3690.32	4049.49	2275.07	2310.8	2427.78	2591.52	2472.96	4193.9	1271.96	2339.19	1620.32	2003.89	2056.82	1682.75	4764.92	2437.8	2387.29
RGMC.9634	d__Bacteria;p__Bacteroidota;c__Bacteroidia;o__Bacteroidales;f__P3;g__UBA1711;s__UBA1711 sp946406015	0	0	0	692.89	885.645	0	1155.55	0	0	508.796	357.17	371.49	415.788	366.639	400.546	306.479	1029.87	1026.85
RGMC.97	d__Bacteria;p__Bacillota_A;c__Clostridia;o__Oscillospirales;f__Oscillospiraceae;g__RUG626;s__RUG626 sp016286595	1647.31	668.532	316.807	1133.76	580.811	708.227	666.755	541.241	1009.27	0	398.383	499.809	503.967	416.531	551.334	1411.22	686.01	692.247
RGMC.9750	d__Bacteria;p__Bacteroidota;c__Bacteroidia;o__Bacteroidales;f__Paludibacteraceae;g__UBA1723;s__UBA1723 sp002392915	475.338	319.56	0	357.545	352.069	389.981	427.986	431.486	569.32	0	0	0	322.179	400.181	289.692	577.051	299.872	296.566
RGMC.9790	d__Bacteria;p__Bacillota_A;c__Clostridia;o__Oscillospirales;f__Oscillospiraceae;g__Limivicinus;s__	857.086	1449.62	1187.58	1597.45	1419.76	1280.93	1124.88	1003.73	663.809	1280.42	1898.47	1921.5	1458.07	1400.55	1462.18	1074.7	1334.84	1318.52
RGMC.9794	d__Bacteria;p__Verrucomicrobiota;c__Lentisphaeria;o__Victivallales;f__Victivallaceae;g__UBA1784;s__	0	0	0	0	0	0	0	0	0	263.715	0	0	157.768	119.011	108.964	0	0	0
RGMC.9899	d__Bacteria;p__Bacillota_A;c__Clostridia;o__Oscillospirales;f__Ruminococcaceae;g__Hominimerdicola;s__Hominimerdicola alba_A	0	747.623	863.728	491.511	634.895	447.879	418.441	549.147	0	0	479.959	502.234	0	0	366.866	0	0	0
RGMC.9969	d__Bacteria;p__Bacillota_A;c__Clostridia;o__Peptostreptococcales;f__Anaerovoracaceae;g__UBA3871;s__UBA3871 sp002392265	569.787	349.346	163.398	489.06	511.578	442.978	700.007	470.251	531.284	595.006	370.192	427.594	555.038	579.598	425.605	635.526	608.418	621.621

## Sheet: gene-mag
MAG	KEGG	GENE	GENEMANE	COUNTS
RGMC.10016	K00248	ACADS, bcd	butyryl-CoA dehydrogenase [EC:1.3.8.1]	1
RGMC.1001	K00248	ACADS, bcd	butyryl-CoA dehydrogenase [EC:1.3.8.1]	1								求和项:COUNTS	GENE
RGMC.10020	K00248	ACADS, bcd	butyryl-CoA dehydrogenase [EC:1.3.8.1]	1								MAG	ACADS, bcd	LDH, ldh	lcdA	scpB, mmcD	sdhA, frdA	sucC	总计
RGMC.10025	K00248	ACADS, bcd	butyryl-CoA dehydrogenase [EC:1.3.8.1]	1								RGMC.1000		1					1
RGMC.10039	K00248	ACADS, bcd	butyryl-CoA dehydrogenase [EC:1.3.8.1]	1								RGMC.10001					1	1	2
RGMC.1003	K00248	ACADS, bcd	butyryl-CoA dehydrogenase [EC:1.3.8.1]	1								RGMC.10003		1					1
RGMC.10042	K00248	ACADS, bcd	butyryl-CoA dehydrogenase [EC:1.3.8.1]	1								RGMC.10004					1		1
RGMC.10042	K00248	ACADS, bcd	butyryl-CoA dehydrogenase [EC:1.3.8.1]	1								RGMC.10008					1		1
RGMC.1004	K00248	ACADS, bcd	butyryl-CoA dehydrogenase [EC:1.3.8.1]	1								RGMC.1001	1	2					3
RGMC.10053	K00248	ACADS, bcd	butyryl-CoA dehydrogenase [EC:1.3.8.1]	1								RGMC.10011		1					1
RGMC.10057	K00248	ACADS, bcd	butyryl-CoA dehydrogenase [EC:1.3.8.1]	1								RGMC.10014					1		1
RGMC.10061	K00248	ACADS, bcd	butyryl-CoA dehydrogenase [EC:1.3.8.1]	1								RGMC.10015		1					1
RGMC.10067	K00248	ACADS, bcd	butyryl-CoA dehydrogenase [EC:1.3.8.1]	1								RGMC.10016	1	2					3
RGMC.10068	K00248	ACADS, bcd	butyryl-CoA dehydrogenase [EC:1.3.8.1]	1								RGMC.10019					1		1
RGMC.1006	K00248	ACADS, bcd	butyryl-CoA dehydrogenase [EC:1.3.8.1]	1								RGMC.10020	1	1					2
RGMC.1007	K00248	ACADS, bcd	butyryl-CoA dehydrogenase [EC:1.3.8.1]	1								RGMC.10021		1					1
RGMC.10086	K00248	ACADS, bcd	butyryl-CoA dehydrogenase [EC:1.3.8.1]	1								RGMC.10022					1		1
RGMC.1008	K00248	ACADS, bcd	butyryl-CoA dehydrogenase [EC:1.3.8.1]	1								RGMC.10024		1					1
RGMC.10090	K00248	ACADS, bcd	butyryl-CoA dehydrogenase [EC:1.3.8.1]	1								RGMC.10025	1	2					3
RGMC.10090	K00248	ACADS, bcd	butyryl-CoA dehydrogenase [EC:1.3.8.1]	1								RGMC.10027		1					1
RGMC.10094	K00248	ACADS, bcd	butyryl-CoA dehydrogenase [EC:1.3.8.1]	1								RGMC.10028		1					1
RGMC.10104	K00248	ACADS, bcd	butyryl-CoA dehydrogenase [EC:1.3.8.1]	1								RGMC.10029					1		1
RGMC.10119	K00248	ACADS, bcd	butyryl-CoA dehydrogenase [EC:1.3.8.1]	1								RGMC.1003	1	1					2
RGMC.10127	K00248	ACADS, bcd	butyryl-CoA dehydrogenase [EC:1.3.8.1]	1								RGMC.10032		1					1
RGMC.10128	K00248	ACADS, bcd	butyryl-CoA dehydrogenase [EC:1.3.8.1]	1								RGMC.10033		1					1
RGMC.10128	K00248	ACADS, bcd	butyryl-CoA dehydrogenase [EC:1.3.8.1]	1								RGMC.10038		1					1
RGMC.10128	K00248	ACADS, bcd	butyryl-CoA dehydrogenase [EC:1.3.8.1]	1								RGMC.10039	1						1
RGMC.10129	K00248	ACADS, bcd	butyryl-CoA dehydrogenase [EC:1.3.8.1]	1								RGMC.1004	1				1		2
RGMC.1013	K00248	ACADS, bcd	butyryl-CoA dehydrogenase [EC:1.3.8.1]	1								RGMC.10041		3					3
RGMC.10145	K00248	ACADS, bcd	butyryl-CoA dehydrogenase [EC:1.3.8.1]	1								RGMC.10042	2						2
RGMC.10148	K00248	ACADS, bcd	butyryl-CoA dehydrogenase [EC:1.3.8.1]	1								RGMC.10044					1		1
RGMC.10149	K00248	ACADS, bcd	butyryl-CoA dehydrogenase [EC:1.3.8.1]	1								RGMC.10049		1					1
RGMC.10150	K00248	ACADS, bcd	butyryl-CoA dehydrogenase [EC:1.3.8.1]	1								RGMC.1005					1		1
RGMC.10151	K00248	ACADS, bcd	butyryl-CoA dehydrogenase [EC:1.3.8.1]	1								RGMC.10053	1						1
RGMC.10157	K00248	ACADS, bcd	butyryl-CoA dehydrogenase [EC:1.3.8.1]	1								RGMC.10056		1					1
RGMC.10157	K00248	ACADS, bcd	butyryl-CoA dehydrogenase [EC:1.3.8.1]	1								RGMC.10057	1						1
RGMC.10158	K00248	ACADS, bcd	butyryl-CoA dehydrogenase [EC:1.3.8.1]	1								RGMC.10058					1		1
RGMC.10158	K00248	ACADS, bcd	butyryl-CoA dehydrogenase [EC:1.3.8.1]	1								RGMC.1006	1				1		2
RGMC.10158	K00248	ACADS, bcd	butyryl-CoA dehydrogenase [EC:1.3.8.1]	1								RGMC.10060		1					1
RGMC.10159	K00248	ACADS, bcd	butyryl-CoA dehydrogenase [EC:1.3.8.1]	1								RGMC.10061	1				1		2
RGMC.10163	K00248	ACADS, bcd	butyryl-CoA dehydrogenase [EC:1.3.8.1]	1								RGMC.10062					1		1
RGMC.10165	K00248	ACADS, bcd	butyryl-CoA dehydrogenase [EC:1.3.8.1]	1								RGMC.10067	1						1
RGMC.10166	K00248	ACADS, bcd	butyryl-CoA dehydrogenase [EC:1.3.8.1]	1								RGMC.10068	1	1					2
RGMC.10167	K00248	ACADS, bcd	butyryl-CoA dehydrogenase [EC:1.3.8.1]	1								RGMC.1007	1						1
RGMC.10175	K00248	ACADS, bcd	butyryl-CoA dehydrogenase [EC:1.3.8.1]	1								RGMC.10070					1		1
RGMC.10175	K00248	ACADS, bcd	butyryl-CoA dehydrogenase [EC:1.3.8.1]	1								RGMC.10073		2					2
RGMC.10178	K00248	ACADS, bcd	butyryl-CoA dehydrogenase [EC:1.3.8.1]	1								RGMC.10079				1	1		2
RGMC.10179	K00248	ACADS, bcd	butyryl-CoA dehydrogenase [EC:1.3.8.1]	1								RGMC.1008	1				1		2
RGMC.10179	K00248	ACADS, bcd	butyryl-CoA dehydrogenase [EC:1.3.8.1]	1								RGMC.10080					1		1
RGMC.10182	K00248	ACADS, bcd	butyryl-CoA dehydrogenase [EC:1.3.8.1]	1								RGMC.10086	1						1
RGMC.10182	K00248	ACADS, bcd	butyryl-CoA dehydrogenase [EC:1.3.8.1]	1								RGMC.10087					1		1
RGMC.10186	K00248	ACADS, bcd	butyryl-CoA dehydrogenase [EC:1.3.8.1]	1								RGMC.10088					1		1
RGMC.1018	K00248	ACADS, bcd	butyryl-CoA dehydrogenase [EC:1.3.8.1]	1								RGMC.10090	2		1				3
RGMC.1018	K00248	ACADS, bcd	butyryl-CoA dehydrogenase [EC:1.3.8.1]	1								RGMC.10091					1		1
RGMC.10196	K00248	ACADS, bcd	butyryl-CoA dehydrogenase [EC:1.3.8.1]	1								RGMC.10094	1						1
RGMC.10203	K00248	ACADS, bcd	butyryl-CoA dehydrogenase [EC:1.3.8.1]	1								RGMC.10095		1					1
RGMC.10203	K00248	ACADS, bcd	butyryl-CoA dehydrogenase [EC:1.3.8.1]	1								RGMC.10096					1		1
RGMC.10206	K00248	ACADS, bcd	butyryl-CoA dehydrogenase [EC:1.3.8.1]	1								RGMC.10097		1					1
RGMC.1020	K00248	ACADS, bcd	butyryl-CoA dehydrogenase [EC:1.3.8.1]	1								RGMC.1010		1					1
RGMC.10214	K00248	ACADS, bcd	butyryl-CoA dehydrogenase [EC:1.3.8.1]	1								RGMC.10102					1		1
RGMC.10216	K00248	ACADS, bcd	butyryl-CoA dehydrogenase [EC:1.3.8.1]	1								RGMC.10103					1		1
RGMC.10227	K00248	ACADS, bcd	butyryl-CoA dehydrogenase [EC:1.3.8.1]	1								RGMC.10104	1				1		2
RGMC.10227	K00248	ACADS, bcd	butyryl-CoA dehydrogenase [EC:1.3.8.1]	1								RGMC.10107					1		1
RGMC.10229	K00248	ACADS, bcd	butyryl-CoA dehydrogenase [EC:1.3.8.1]	1								RGMC.10109		1					1
RGMC.10229	K00248	ACADS, bcd	butyryl-CoA dehydrogenase [EC:1.3.8.1]	1								RGMC.1011						1	1
RGMC.10229	K00248	ACADS, bcd	butyryl-CoA dehydrogenase [EC:1.3.8.1]	1								RGMC.10110					1		1
RGMC.10230	K00248	ACADS, bcd	butyryl-CoA dehydrogenase [EC:1.3.8.1]	1								RGMC.10111		1					1
RGMC.10232	K00248	ACADS, bcd	butyryl-CoA dehydrogenase [EC:1.3.8.1]	1								RGMC.10112		1					1
RGMC.10236	K00248	ACADS, bcd	butyryl-CoA dehydrogenase [EC:1.3.8.1]	1								RGMC.10115					1		1
RGMC.10247	K00248	ACADS, bcd	butyryl-CoA dehydrogenase [EC:1.3.8.1]	1								RGMC.10117					1		1
RGMC.10249	K00248	ACADS, bcd	butyryl-CoA dehydrogenase [EC:1.3.8.1]	1								RGMC.10119	1	1					2
RGMC.10249	K00248	ACADS, bcd	butyryl-CoA dehydrogenase [EC:1.3.8.1]	1								RGMC.1012		1					1
RGMC.10258	K00248	ACADS, bcd	butyryl-CoA dehydrogenase [EC:1.3.8.1]	1								RGMC.10120		1					1
RGMC.10258	K00248	ACADS, bcd	butyryl-CoA dehydrogenase [EC:1.3.8.1]	1								RGMC.10122					1		1
RGMC.10284	K00248	ACADS, bcd	butyryl-CoA dehydrogenase [EC:1.3.8.1]	1								RGMC.10123					1		1
RGMC.10290	K00248	ACADS, bcd	butyryl-CoA dehydrogenase [EC:1.3.8.1]	1								RGMC.10126					1		1
RGMC.10294	K00248	ACADS, bcd	butyryl-CoA dehydrogenase [EC:1.3.8.1]	1								RGMC.10127	1	2					3
RGMC.10295	K00248	ACADS, bcd	butyryl-CoA dehydrogenase [EC:1.3.8.1]	1								RGMC.10128	3						3
RGMC.102	K00248	ACADS, bcd	butyryl-CoA dehydrogenase [EC:1.3.8.1]	1								RGMC.10129	1	1					2
RGMC.10303	K00248	ACADS, bcd	butyryl-CoA dehydrogenase [EC:1.3.8.1]	1								RGMC.1013	1						1
RGMC.10306	K00248	ACADS, bcd	butyryl-CoA dehydrogenase [EC:1.3.8.1]	1								RGMC.10131					1		1
RGMC.10307	K00248	ACADS, bcd	butyryl-CoA dehydrogenase [EC:1.3.8.1]	1								RGMC.10133		1					1
RGMC.10314	K00248	ACADS, bcd	butyryl-CoA dehydrogenase [EC:1.3.8.1]	1								RGMC.10134					1		1
RGMC.10322	K00248	ACADS, bcd	butyryl-CoA dehydrogenase [EC:1.3.8.1]	1								RGMC.10135		1					1
RGMC.10324	K00248	ACADS, bcd	butyryl-CoA dehydrogenase [EC:1.3.8.1]	1								RGMC.10137		1					1
RGMC.10325	K00248	ACADS, bcd	butyryl-CoA dehydrogenase [EC:1.3.8.1]	1								RGMC.10138		1					1
RGMC.10326	K00248	ACADS, bcd	butyryl-CoA dehydrogenase [EC:1.3.8.1]	1								RGMC.10139					1	1	2
RGMC.10326	K00248	ACADS, bcd	butyryl-CoA dehydrogenase [EC:1.3.8.1]	1								RGMC.10140		1					1
RGMC.10326	K00248	ACADS, bcd	butyryl-CoA dehydrogenase [EC:1.3.8.1]	1								RGMC.10142		1					1
RGMC.10331	K00248	ACADS, bcd	butyryl-CoA dehydrogenase [EC:1.3.8.1]	1								RGMC.10143		1					1
RGMC.10331	K00248	ACADS, bcd	butyryl-CoA dehydrogenase [EC:1.3.8.1]	1								RGMC.10145	1						1
RGMC.10331	K00248	ACADS, bcd	butyryl-CoA dehydrogenase [EC:1.3.8.1]	1								RGMC.10148	1	2					3
RGMC.10331	K00248	ACADS, bcd	butyryl-CoA dehydrogenase [EC:1.3.8.1]	1								RGMC.10149	1						1
RGMC.10344	K00248	ACADS, bcd	butyryl-CoA dehydrogenase [EC:1.3.8.1]	1								RGMC.1015					2	1	3
RGMC.10345	K00248	ACADS, bcd	butyryl-CoA dehydrogenase [EC:1.3.8.1]	1								RGMC.10150	1						1
RGMC.10348	K00248	ACADS, bcd	butyryl-CoA dehydrogenase [EC:1.3.8.1]	1								RGMC.10151	1						1
RGMC.10348	K00248	ACADS, bcd	butyryl-CoA dehydrogenase [EC:1.3.8.1]	1								RGMC.10152						1	1
RGMC.10348	K00248	ACADS, bcd	butyryl-CoA dehydrogenase [EC:1.3.8.1]	1								RGMC.10153		1					1
RGMC.10348	K00248	ACADS, bcd	butyryl-CoA dehydrogenase [EC:1.3.8.1]	1								RGMC.10156		1					1
RGMC.10355	K00248	ACADS, bcd	butyryl-CoA dehydrogenase [EC:1.3.8.1]	1								RGMC.10157	2	2					4
RGMC.10359	K00248	ACADS, bcd	butyryl-CoA dehydrogenase [EC:1.3.8.1]	1								RGMC.10158	3	1					4
RGMC.1035	K00248	ACADS, bcd	butyryl-CoA dehydrogenase [EC:1.3.8.1]	1								RGMC.10159	1						1
RGMC.10360	K00248	ACADS, bcd	butyryl-CoA dehydrogenase [EC:1.3.8.1]	1								RGMC.1016		1					1
RGMC.10362	K00248	ACADS, bcd	butyryl-CoA dehydrogenase [EC:1.3.8.1]	1								RGMC.10161		1					1
RGMC.10364	K00248	ACADS, bcd	butyryl-CoA dehydrogenase [EC:1.3.8.1]	1								RGMC.10163	1	1					2
RGMC.10380	K00248	ACADS, bcd	butyryl-CoA dehydrogenase [EC:1.3.8.1]	1								RGMC.10164					1	1	2
RGMC.10383	K00248	ACADS, bcd	butyryl-CoA dehydrogenase [EC:1.3.8.1]	1								RGMC.10165	1						1
RGMC.10384	K00248	ACADS, bcd	butyryl-CoA dehydrogenase [EC:1.3.8.1]	1								RGMC.10166	1	1					2
RGMC.1038	K00248	ACADS, bcd	butyryl-CoA dehydrogenase [EC:1.3.8.1]	1								RGMC.10167	1	1					2
RGMC.10391	K00248	ACADS, bcd	butyryl-CoA dehydrogenase [EC:1.3.8.1]	1								RGMC.10168					1		1
RGMC.10402	K00248	ACADS, bcd	butyryl-CoA dehydrogenase [EC:1.3.8.1]	1								RGMC.10170					1		1
RGMC.10406	K00248	ACADS, bcd	butyryl-CoA dehydrogenase [EC:1.3.8.1]	1								RGMC.10172		1					1
RGMC.10407	K00248	ACADS, bcd	butyryl-CoA dehydrogenase [EC:1.3.8.1]	1								RGMC.10173		1					1
RGMC.10407	K00248	ACADS, bcd	butyryl-CoA dehydrogenase [EC:1.3.8.1]	1								RGMC.10175	2	3					5
RGMC.10408	K00248	ACADS, bcd	butyryl-CoA dehydrogenase [EC:1.3.8.1]	1								RGMC.10177		1					1
RGMC.1041	K00248	ACADS, bcd	butyryl-CoA dehydrogenase [EC:1.3.8.1]	1								RGMC.10178	1						1
RGMC.10421	K00248	ACADS, bcd	butyryl-CoA dehydrogenase [EC:1.3.8.1]	1								RGMC.10179	2	1					3
RGMC.10421	K00248	ACADS, bcd	butyryl-CoA dehydrogenase [EC:1.3.8.1]	1								RGMC.1018	2	2					4
RGMC.10422	K00248	ACADS, bcd	butyryl-CoA dehydrogenase [EC:1.3.8.1]	1								RGMC.10180		2					2
RGMC.10432	K00248	ACADS, bcd	butyryl-CoA dehydrogenase [EC:1.3.8.1]	1								RGMC.10182	2						2
RGMC.10441	K00248	ACADS, bcd	butyryl-CoA dehydrogenase [EC:1.3.8.1]	1								RGMC.10183		2					2
RGMC.10442	K00248	ACADS, bcd	butyryl-CoA dehydrogenase [EC:1.3.8.1]	1								RGMC.10185					2	1	3
RGMC.10443	K00248	ACADS, bcd	butyryl-CoA dehydrogenase [EC:1.3.8.1]	1								RGMC.10186	1	1					2
RGMC.10446	K00248	ACADS, bcd	butyryl-CoA dehydrogenase [EC:1.3.8.1]	1								RGMC.10189		1					1
RGMC.10448	K00248	ACADS, bcd	butyryl-CoA dehydrogenase [EC:1.3.8.1]	1								RGMC.10192		1					1
RGMC.10448	K00248	ACADS, bcd	butyryl-CoA dehydrogenase [EC:1.3.8.1]	1								RGMC.10194		2					2
RGMC.10449	K00248	ACADS, bcd	butyryl-CoA dehydrogenase [EC:1.3.8.1]	1								RGMC.10195		1					1
RGMC.10466	K00248	ACADS, bcd	butyryl-CoA dehydrogenase [EC:1.3.8.1]	1								RGMC.10196	1						1
RGMC.10466	K00248	ACADS, bcd	butyryl-CoA dehydrogenase [EC:1.3.8.1]	1								RGMC.102	1						1
RGMC.10473	K00248	ACADS, bcd	butyryl-CoA dehydrogenase [EC:1.3.8.1]	1								RGMC.1020	1				1		2
RGMC.10477	K00248	ACADS, bcd	butyryl-CoA dehydrogenase [EC:1.3.8.1]	1								RGMC.10200		2					2
RGMC.10483	K00248	ACADS, bcd	butyryl-CoA dehydrogenase [EC:1.3.8.1]	1								RGMC.10203	2						2
RGMC.10488	K00248	ACADS, bcd	butyryl-CoA dehydrogenase [EC:1.3.8.1]	1								RGMC.10204		1					1
RGMC.10490	K00248	ACADS, bcd	butyryl-CoA dehydrogenase [EC:1.3.8.1]	1								RGMC.10206	1	1					2
RGMC.10494	K00248	ACADS, bcd	butyryl-CoA dehydrogenase [EC:1.3.8.1]	1								RGMC.10208					1		1
RGMC.10499	K00248	ACADS, bcd	butyryl-CoA dehydrogenase [EC:1.3.8.1]	1								RGMC.10210		1					1
RGMC.10499	K00248	ACADS, bcd	butyryl-CoA dehydrogenase [EC:1.3.8.1]	1								RGMC.10213		2					2
RGMC.10508	K00248	ACADS, bcd	butyryl-CoA dehydrogenase [EC:1.3.8.1]	1								RGMC.10214	1						1
RGMC.10508	K00248	ACADS, bcd	butyryl-CoA dehydrogenase [EC:1.3.8.1]	1								RGMC.10216	1	1					2
RGMC.10508	K00248	ACADS, bcd	butyryl-CoA dehydrogenase [EC:1.3.8.1]	1								RGMC.10217					1		1
RGMC.10509	K00248	ACADS, bcd	butyryl-CoA dehydrogenase [EC:1.3.8.1]	1								RGMC.10219		1					1
RGMC.10510	K00248	ACADS, bcd	butyryl-CoA dehydrogenase [EC:1.3.8.1]	1								RGMC.10220		1					1
RGMC.10511	K00248	ACADS, bcd	butyryl-CoA dehydrogenase [EC:1.3.8.1]	1								RGMC.10221					1		1
RGMC.10514	K00248	ACADS, bcd	butyryl-CoA dehydrogenase [EC:1.3.8.1]	1								RGMC.10222					1		1
RGMC.10515	K00248	ACADS, bcd	butyryl-CoA dehydrogenase [EC:1.3.8.1]	1								RGMC.10223					1		1
RGMC.10515	K00248	ACADS, bcd	butyryl-CoA dehydrogenase [EC:1.3.8.1]	1								RGMC.10225		1					1
RGMC.10515	K00248	ACADS, bcd	butyryl-CoA dehydrogenase [EC:1.3.8.1]	1								RGMC.10226					1		1
RGMC.10516	K00248	ACADS, bcd	butyryl-CoA dehydrogenase [EC:1.3.8.1]	1								RGMC.10227	2						2
RGMC.10516	K00248	ACADS, bcd	butyryl-CoA dehydrogenase [EC:1.3.8.1]	1								RGMC.10229	3						3
RGMC.10517	K00248	ACADS, bcd	butyryl-CoA dehydrogenase [EC:1.3.8.1]	1								RGMC.10230	1						1
RGMC.10517	K00248	ACADS, bcd	butyryl-CoA dehydrogenase [EC:1.3.8.1]	1								RGMC.10232	1	1					2
RGMC.10517	K00248	ACADS, bcd	butyryl-CoA dehydrogenase [EC:1.3.8.1]	1								RGMC.10235		1					1
RGMC.10517	K00248	ACADS, bcd	butyryl-CoA dehydrogenase [EC:1.3.8.1]	1								RGMC.10236	1	1					2
RGMC.10524	K00248	ACADS, bcd	butyryl-CoA dehydrogenase [EC:1.3.8.1]	1								RGMC.10237		1					1
RGMC.10524	K00248	ACADS, bcd	butyryl-CoA dehydrogenase [EC:1.3.8.1]	1								RGMC.10238		1					1
RGMC.10525	K00248	ACADS, bcd	butyryl-CoA dehydrogenase [EC:1.3.8.1]	1								RGMC.10239					1		1
RGMC.10525	K00248	ACADS, bcd	butyryl-CoA dehydrogenase [EC:1.3.8.1]	1								RGMC.10240		3					3
RGMC.10525	K00248	ACADS, bcd	butyryl-CoA dehydrogenase [EC:1.3.8.1]	1								RGMC.10242					1		1
RGMC.10530	K00248	ACADS, bcd	butyryl-CoA dehydrogenase [EC:1.3.8.1]	1								RGMC.10244						1	1
RGMC.10535	K00248	ACADS, bcd	butyryl-CoA dehydrogenase [EC:1.3.8.1]	1								RGMC.10245					1		1
RGMC.10536	K00248	ACADS, bcd	butyryl-CoA dehydrogenase [EC:1.3.8.1]	1								RGMC.10246		1					1
RGMC.10536	K00248	ACADS, bcd	butyryl-CoA dehydrogenase [EC:1.3.8.1]	1								RGMC.10247	1	1					2
RGMC.10536	K00248	ACADS, bcd	butyryl-CoA dehydrogenase [EC:1.3.8.1]	1								RGMC.10249	2						2
RGMC.10539	K00248	ACADS, bcd	butyryl-CoA dehydrogenase [EC:1.3.8.1]	1								RGMC.10252					1		1
RGMC.10541	K00248	ACADS, bcd	butyryl-CoA dehydrogenase [EC:1.3.8.1]	1								RGMC.10253		1					1
RGMC.10541	K00248	ACADS, bcd	butyryl-CoA dehydrogenase [EC:1.3.8.1]	1								RGMC.10258	2		1				3
RGMC.10544	K00248	ACADS, bcd	butyryl-CoA dehydrogenase [EC:1.3.8.1]	1								RGMC.10259		1					1
RGMC.10544	K00248	ACADS, bcd	butyryl-CoA dehydrogenase [EC:1.3.8.1]	1								RGMC.10260					1		1
RGMC.10547	K00248	ACADS, bcd	butyryl-CoA dehydrogenase [EC:1.3.8.1]	1								RGMC.10261					1		1
RGMC.10547	K00248	ACADS, bcd	butyryl-CoA dehydrogenase [EC:1.3.8.1]	1								RGMC.10263		1					1
RGMC.10550	K00248	ACADS, bcd	butyryl-CoA dehydrogenase [EC:1.3.8.1]	1								RGMC.10264					1		1
RGMC.10550	K00248	ACADS, bcd	butyryl-CoA dehydrogenase [EC:1.3.8.1]	1								RGMC.10265		1					1
[truncated: 245,864+ more rows]

## Sheet: LDH-analysis
class	3-NOP1	3-NOP2	3-NOP3	3-NOP4	3-NOP5	3-NOP6	CON1	CON2	CON3	CON4	CON5	CON6	species	3-NOP	SD	CON	SD	SEM	P-VALUE
[truncated: 11 more rows]

[truncated: 3 more sheets: LDH, sdhA, frdA-analysis, sdhA, frdA-data]
