# Supplementary material for: Metatranscriptomic changes in the propionate pathway and carbohydrate enzyme revealed the rebalancing mechanism of rumen microbiota after CH4 inhibition by 3-NOP
Source: Research Square preprint supplement (doi:10.21203/rs.3.rs-7121971/v1), 2025-08-11
Supplement: Supplementary file 2 [file 45a2137497778e3cb1c4ff3b.xlsx]

## Sheet: catalog
Pathway	ID	CON	CON	CON	CON	CON	CON	3-NOP	3-NOP	3-NOP	3-NOP	3-NOP	3-NOP
Acetate->Butyrate	K01895	0.57	0.4	0.23	0.28	1.27	0.48	0.35	0.48	0.4	0.41	0.54	0.69	ACSS1_2, acs; acetyl-CoA synthetase [EC:6.2.1.1]
Acetate->Butyrate	K01782	0.6	0.38	0.61	0.45	1.54	0.72	0.52	0.39	0.42	0.72	0.95	1.04	fadJ; 3-hydroxyacyl-CoA dehydrogenase / enoyl-CoA hydratase / 3-hydroxybutyryl-CoA epimerase [EC:1.1.1.35 4.2.1.17 5.1.2.3]
Acetate->Butyrate	K00023	1.06	1.28	1.04	1.07	3.68	1.77	1.52	1.82	1.75	1.65	1.76	2.79	phbB; acetoacetyl-CoA reductase [EC:1.1.1.36]
Acetate->Butyrate	K07516	2	1.56	1.36	1.6	2.82	1.61	1.39	1.36	1.14	1.55	2.04	1.24	fadN; 3-hydroxyacyl-CoA dehydrogenase [EC:1.1.1.35]
Acetate->Butyrate	K00209	3.04	3.54	2.95	3.94	7.12	4.56	6.46	6.38	7.93	8.31	8.95	7.82	fabV, ter; enoyl-[acyl-carrier protein] reductase / trans-2-enoyl-CoA reductase (NAD+) [EC:1.3.1.9 1.3.1.44]
Acetate->Butyrate	K17865	8.76	11.6	9.64	12.21	14.16	10.07	10.05	12.87	15.37	13.49	19.34	5.02	croR; 3-hydroxybutyryl-CoA dehydratase [EC:4.2.1.55]
Acetate->Butyrate	K01715	98.35	109.91	105.25	127.94	134.97	112.18	97.57	102.74	110.27	125.28	158.37	71.34	crt; enoyl-CoA hydratase [EC:4.2.1.17]
Acetate->Butyrate	K00074	262.01	252.25	230.07	263.95	284.92	235.94	209.31	205.15	276.9	241.19	370.29	171.39	paaH, hbd, fadB, mmgB; 3-hydroxybutyryl-CoA dehydrogenase [EC:1.1.1.157]
Acetate->Butyrate	K00626	476.22	489.75	426.09	459.25	548.62	415.52	455.18	442.54	517.13	497.28	679.86	181.49	E2.3.1.9, atoB; acetyl-CoA C-acetyltransferase [EC:2.3.1.9]
Starch->Glucose	K00702	43.64	38.23	33.25	46.26	54.27	43.29	50.75	57.81	58.26	68.54	69.46	68.83	E2.4.1.20; cellobiose phosphorylase [EC:2.4.1.20]
Pyruvate->Acetate	K18118	41.1	47.84	41.82	45.99	52.05	39.45	58.58	68.69	68.46	71.92	97.84	57.53	aarC, cat1; succinyl-CoA:acetate CoA-transferase [EC:2.8.3.18]
Pyruvate->Acetate	K00625	46.53	40.31	33.69	40.02	42.56	38.65	27.58	31.16	32.01	31.09	36.06	24.97	E2.3.1.8, pta; phosphate acetyltransferase [EC:2.3.1.8]
Pyruvate->Acetate	K01035	69.33	58.93	53.46	64.71	67.77	57.37	35.27	44.97	36.46	50.51	41.77	36.46	atoA; acetate CoA/acetoacetate CoA-transferase beta subunit [EC:2.8.3.8 2.8.3.9]
Pyruvate->Acetate	K01034	112.7	97.3	88.8	101.82	109.11	99.7	98.54	121.12	88.57	121.79	119.6	59.18	atoD; acetate CoA/acetoacetate CoA-transferase alpha subunit [EC:2.8.3.8 2.8.3.9]
Pyruvate->Acetate	K00175	236.86	195.44	174.48	246.11	278.11	200.77	123.29	153.2	147.05	196.16	192.49	154.97	korB, oorB, oforB; 2-oxoglutarate/2-oxoacid ferredoxin oxidoreductase subunit beta [EC:1.2.7.3 1.2.7.11]
Pyruvate->Acetate	K00174	254.76	223.31	190.5	283.84	311.24	217.58	138.86	188.57	172.24	225.99	232.38	165.77	korA, oorA, oforA; 2-oxoglutarate/2-oxoacid ferredoxin oxidoreductase subunit alpha [EC:1.2.7.3 1.2.7.11]
Pyruvate->Acetate	K00925	311.91	297.71	256.14	300.69	316.67	274.11	243.27	274.96	286.8	300.18	327.56	228.28	ackA; acetate kinase [EC:2.7.2.1]
Pyruvate->Butyrate	K00023	1.06	1.28	1.04	1.07	3.68	1.77	1.52	1.82	1.75	1.65	1.76	2.79	phbB; acetoacetyl-CoA reductase [EC:1.1.1.36]
Pyruvate->Butyrate	K17865	8.76	11.6	9.64	12.21	14.16	10.07	10.05	12.87	15.37	13.49	19.34	5.02	croR; 3-hydroxybutyryl-CoA dehydratase [EC:4.2.1.55]
Pyruvate->Butyrate	K01692	9.73	8.61	6.2	11.03	11.59	7.15	6.4	5.7	8.15	8.96	14.79	5.25	paaF, echA; enoyl-CoA hydratase [EC:4.2.1.17]
Pyruvate->Butyrate	K00634	14.58	8.32	8.23	11.31	12.27	7.47	3.74	4.46	4.46	5.85	6.21	6.17	ptb; phosphate butyryltransferase [EC:2.3.1.19]
Pyruvate->Butyrate	K00171	65.98	67.44	59.08	73.09	84.44	63.11	32.85	45.89	33.48	45.04	41.65	11.19	porD; pyruvate ferredoxin oxidoreductase delta subunit [EC:1.2.7.1]
Pyruvate->Butyrate	K01035	69.33	58.93	53.46	64.71	67.77	57.37	35.27	44.97	36.46	50.51	41.77	36.46	atoA; acetate CoA/acetoacetate CoA-transferase beta subunit [EC:2.8.3.8 2.8.3.9]
Pyruvate->Butyrate	K00929	71.75	61.06	60.07	75.04	77.51	65.83	44.22	53.21	46.56	54.81	58.08	38.38	buk; butyrate kinase [EC:2.7.2.7]
Pyruvate->Butyrate	K00172	98.01	97.99	92.58	111.4	85.85	103.78	39.77	62.43	45.16	44.43	49.44	20.4	porG; pyruvate ferredoxin oxidoreductase gamma subunit [EC:1.2.7.1]
Pyruvate->Butyrate	K01715	98.35	109.91	105.25	127.94	134.97	112.18	97.57	102.74	110.27	125.28	158.37	71.34	crt; enoyl-CoA hydratase [EC:4.2.1.17]
Pyruvate->Butyrate	K01034	112.7	97.3	88.8	101.82	109.11	99.7	98.54	121.12	88.57	121.79	119.6	59.18	atoD; acetate CoA/acetoacetate CoA-transferase alpha subunit [EC:2.8.3.8 2.8.3.9]
Pyruvate->Butyrate	K00169	115.81	121.68	104.38	132.88	141.78	107.66	56.22	81.92	61.13	83.48	80.4	19.62	porA; pyruvate ferredoxin oxidoreductase alpha subunit [EC:1.2.7.1]
Pyruvate->Butyrate	K00170	162.14	166.87	151.96	180.03	186.45	153.75	69.51	101.97	72.63	103.71	79.95	24.25	porB; pyruvate ferredoxin oxidoreductase beta subunit [EC:1.2.7.1]
Pyruvate->Butyrate	K00175	236.86	195.44	174.48	246.11	278.11	200.77	123.29	153.2	147.05	196.16	192.49	154.97	korB, oorB, oforB; 2-oxoglutarate/2-oxoacid ferredoxin oxidoreductase subunit beta [EC:1.2.7.3 1.2.7.11]
Pyruvate->Butyrate	K00174	254.76	223.31	190.5	283.84	311.24	217.58	138.86	188.57	172.24	225.99	232.38	165.77	korA, oorA, oforA; 2-oxoglutarate/2-oxoacid ferredoxin oxidoreductase subunit alpha [EC:1.2.7.3 1.2.7.11]
Pyruvate->Butyrate	K00074	262.01	252.25	230.07	263.95	284.92	235.94	209.31	205.15	276.9	241.19	370.29	171.39	paaH, hbd, fadB, mmgB; 3-hydroxybutyryl-CoA dehydrogenase [EC:1.1.1.157]
Pyruvate->Butyrate	K00626	476.22	489.75	426.09	459.25	548.62	415.52	455.18	442.54	517.13	497.28	679.86	181.49	E2.3.1.9, atoB; acetyl-CoA C-acetyltransferase [EC:2.3.1.9]
Pyuvate->Lacate->Propionate	K20626	0	0	0	0	0	0	2.66	0	10.16	0.26	18.46	7.65	lcdA; lactoyl-CoA dehydratase subunit alpha [EC:4.2.1.54]
Pyuvate->Lacate->Propionate	K20627	0	0	0	0	0	0	4.07	0.05	17.27	0.36	25.14	15.66	lcdB; lactoyl-CoA dehydratase subunit beta [EC:4.2.1.54]
Pyuvate->Lacate->Propionate	K00249	16.61	23.53	20.69	26.31	29.08	19.81	18.27	17.46	22.37	18.64	33.81	10	ACADM, acd; acyl-CoA dehydrogenase [EC:1.3.8.7]
Pyuvate->Lacate->Propionate	K00016	34.46	27.95	23.68	25.74	26.56	25.04	29.53	33.16	36.58	36.61	40.59	34.93	LDH, ldh; L-lactate dehydrogenase [EC:1.1.1.27]
Pyuvate->Lacate->Propionate	K01026	45.16	45.42	38.3	42.79	49.94	39.54	29.87	32.87	41.73	35.35	53.85	18.18	pct; propionate CoA-transferase [EC:2.8.3.1]
Pyuvate->Lacate->Propionate	K00248	192.11	217.82	189.94	235.85	262.71	196.37	150.77	176.9	194.53	212.86	280.74	115.79	ACADS, bcd; butyryl-CoA dehydrogenase [EC:1.3.8.1]
Pyuvate->Succinate->Propionate	K00026	2.08	3.11	2.17	1.56	1.47	2.59	2.07	3.97	2.09	2.98	2.54	3.13	MDH2; malate dehydrogenase [EC:1.1.1.37]
Pyuvate->Succinate->Propionate	K01899	2.62	4.48	3.48	2.2	2.44	4.21	3.36	6.64	2.88	4.88	2.67	3.79	LSC1; succinyl-CoA synthetase alpha subunit [EC:6.2.1.4 6.2.1.5]
Pyuvate->Succinate->Propionate	K01679	6.89	7.13	7.53	11.26	14.28	10.07	13.34	14.34	15.8	18.67	18.72	19.43	E4.2.1.2B, fumC, FH; fumarate hydratase, class II [EC:4.2.1.2]
Pyuvate->Succinate->Propionate	K01958	7.47	7.86	7.56	8.81	9.06	7.53	7.28	8.05	10.21	10.98	13.34	3.02	PC, pyc; pyruvate carboxylase [EC:6.4.1.1]
Pyuvate->Succinate->Propionate	K01903	8.32	8.57	7.24	10.63	11.95	7.23	7.7	8.13	8.63	9.29	13.55	6.78	sucC; succinyl-CoA synthetase beta subunit [EC:6.2.1.5]
Pyuvate->Succinate->Propionate	K01678	12.55	9.8	9.98	9.75	11.11	11.55	9.07	9.46	9.95	7.95	10.67	4.54	E4.2.1.2AB, fumB; fumarate hydratase subunit beta [EC:4.2.1.2]
Pyuvate->Succinate->Propionate	K01677	14.74	13.85	12.21	13.22	12.71	12.85	10.62	13.41	12.72	11.49	14.83	6.59	E4.2.1.2AA, fumA; fumarate hydratase subunit alpha [EC:4.2.1.2]
Pyuvate->Succinate->Propionate	K01902	29.3	31	27.61	34.25	38.26	30.9	25.41	30.48	26.41	32.13	32.87	16.81	sucD; succinyl-CoA synthetase alpha subunit [EC:6.2.1.5]
Pyuvate->Succinate->Propionate	K01676	31.91	24.96	21.8	33.34	36.68	28.98	37.6	38.96	41.36	48.39	49.74	58.05	E4.2.1.2A, fumA, fumB; fumarate hydratase, class I [EC:4.2.1.2]
Pyuvate->Succinate->Propionate	K01966	34.67	33.55	29.7	43.52	46.82	35.68	28.55	37.53	32.56	46.03	40.19	37.11	PCCB, pccB; propionyl-CoA carboxylase beta chain [EC:6.4.1.3 2.1.3.15]
Pyuvate->Succinate->Propionate	K00024	35.87	25.98	22.8	34.35	34.61	30.81	95.3	55.43	132.55	82.83	173.26	183.25	mdh; malate dehydrogenase [EC:1.1.1.37]
Pyuvate->Succinate->Propionate	K01960	43.12	26.57	25.09	32.78	27.72	28.68	11.51	19.71	14.45	13.18	15.74	3.66	pycB; pyruvate carboxylase subunit B [EC:6.4.1.1]
Pyuvate->Succinate->Propionate	K00239	46.67	35.1	29.24	49.13	57.48	38.35	47.62	51.41	55.96	69.51	72.05	64.63	sdhA, frdA; succinate dehydrogenase / fumarate reductase, flavoprotein subunit [EC:1.3.5.1 1.3.5.4]
Pyuvate->Succinate->Propionate	K01847	62.43	53.51	48.14	65.91	65.61	56.7	54.05	58.96	60.1	70.45	71.72	76.13	MUT; methylmalonyl-CoA mutase [EC:5.4.99.2]
Pyuvate->Succinate->Propionate	K00240	114.35	107.47	109.02	138.54	137.48	125.8	183.43	171.98	204.29	208.22	218.33	264.74	sdhB, frdB; succinate dehydrogenase / fumarate reductase, iron-sulfur subunit [EC:1.3.5.1 1.3.5.4]
Pyuvate->Succinate->Propionate	K05606	126.41	94.59	87.47	107.28	99.28	106.96	93.65	102.96	93.12	108.98	87.44	123.6	MCEE, epi; methylmalonyl-CoA/ethylmalonyl-CoA epimerase [EC:5.1.99.1]
Starch->Glucose	K05343	0.37	0.34	0.41	0.19	0.19	0.27	0.14	0.09	0.35	0.15	0.23	0.19	treS; maltose alpha-D-glucosyltransferase / alpha-amylase [EC:5.4.99.16 3.2.1.1]
Starch->Glucose	K00701	0.38	0.17	0.22	0.13	0.8	0.4	0.43	0.36	0.39	0.34	0.54	0.56	cgt; cyclomaltodextrin glucanotransferase [EC:2.4.1.19]
Starch->Glucose	K05342	0.46	0.64	0.51	0.43	0.61	0.36	0.59	0.54	0.69	0.49	0.65	0.16	E2.4.1.64; alpha,alpha-trehalose phosphorylase [EC:2.4.1.64]
Starch->Glucose	K01214	0.49	0.37	0.66	0.55	0.45	0.61	0.67	0.86	0.68	0.58	0.72	0.79	ISA, treX; isoamylase [EC:3.2.1.68]
Starch->Glucose	K01208	2.75	4.17	4.61	5.07	4.86	4.4	2.93	4.17	3	4.66	3.53	2.65	cd, ma, nplT; cyclomaltodextrinase / maltogenic alpha-amylase / neopullulanase [EC:3.2.1.54 3.2.1.133 3.2.1.135]
Starch->Glucose	K01176	21.27	16.9	15.22	23.6	19.25	19.75	18.97	20.7	20.44	23.09	24	24.16	AMY, amyA, malS; alpha-amylase [EC:3.2.1.1]
Starch->Glucose	K00705	123.54	122.31	105.24	112.79	116.64	105.89	112.03	110.92	126.43	129.91	141.62	125.6	malQ; 4-alpha-glucanotransferase [EC:2.4.1.25]
Starch->Glucose	K01179	235.91	158.36	148.81	185.02	205.55	178.27	200.77	210.32	220.18	241.82	241.27	281.31	E3.2.1.4; endoglucanase [EC:3.2.1.4]

## Sheet: analysis
Pathway	CON	CON	CON	CON	CON	CON	3-NOP	3-NOP	3-NOP	3-NOP	3-NOP	3-NOP	Pathway	3-NOP	3-NOP-SD	CON	CON-SD	SEM	P-VALUE
Acetate->Butyrate	852.61	870.67	777.24	870.69	999.1	782.85	782.35	773.73	931.31	889.88	1242.1	442.82	Acetate->Butyrate	843.698	259.96	858.86	80.53	139	0.8728
Methanogenesis	15225.8	17923.4	14945.9	20434.9	25173.3	17532.3	10145.2	15014.2	12238.8	14758	15905.9	5899.69	Methanogenesis	12327	3795.21	18539.3	3818.08	3108.11	0.0163
Pyruvate->Acetate	1073.19	960.84	838.89	1083.18	1177.51	927.63	725.39	882.67	831.59	997.64	1047.7	727.16	Pyruvate->Acetate	868.692	134.767	1010.21	123.197	105.31	0.0782
Pyruvate->Butyrate	2058.05	1971.74	1761.83	2155.68	2352.47	1859.65	1422.3	1628.56	1637.31	1819.62	2146.38	973.67	Pyruvate->Butyrate	1604.64	393.118	2026.57	212.051	247.06	0.0374
Pyuvate->Lacate->Propionate	288.34	314.72	272.61	330.69	368.29	280.76	235.17	260.44	322.64	304.08	452.59	202.21	Pyuvate->Lacate->Propionate	296.188	88.382	309.235	36.24	50.88	0.4233
Pyuvate->Succinate->Propionate	579.4	487.53	451.04	596.53	606.96	538.89	630.56	631.42	723.08	745.96	837.66	875.26	Pyuvate->Succinate->Propionate	740.657	101.901	543.392	62.978	67.31	0.0039
Starch->Glucose	428.81	341.49	308.93	374.04	402.62	353.24	387.28	405.77	430.42	469.58	482.02	504.25	Starch->Glucose	446.553	45.943	368.188	43.226	36.4	0.0163
