# Supplementary material for: Metatranscriptomic changes in the propionate pathway and carbohydrate enzyme revealed the rebalancing mechanism of rumen microbiota after CH4 inhibition by 3-NOP
Source: Research Square preprint supplement (doi:10.21203/rs.3.rs-7121971/v1), 2025-08-11
Supplement: Supplementary file 3 [file 6190a269021bda939a2f0066.xlsx]

## Sheet: CAZy enzyme
CAZy_name	CON	CON	CON	CON	CON	CON	3-NOP	3-NOP	3-NOP	3-NOP	3-NOP	3-NOP	CAZy_name	3-NOP	CON	SEM	P=VALUE
AA3	0.265435	0.275229	0.202162	0.176704	0.944434	0.251546	0.374933	0.209999	0.284192	0.296326	0.34895	0.486513	AA3	0.33349	0.35259	0.38672	0.1495
CBM11	0.541093	0.47333	0.691653	0.536524	0.461235	0.514645	0.226704	0.296967	0.295959	0.342884	0.452192	0.408728	CBM11	0.33724	0.53641	0.165078	0.0039
CBM22	0.441548	0.544627	0.45421	0.668293	1.04527	0.580191	0.410756	0.549089	0.434609	0.604456	0.69859	0.25394	CBM22	0.49191	0.62236	0.381705	0.3367
CBM3	0.830868	0.877191	0.610684	0.398824	0.523956	0.617643	0.508659	0.377595	0.2722	0.502418	0.253764	0.416982	CBM3	0.3886	0.64319	0.291568	0.0163
CBM30	19.5969	22.0154	22.1892	23.1093	21.6061	22.9737	24.6239	26.2909	28.562	21.9983	24.1557	21.8785	CBM30	24.5849	21.9151	1.83918	0.0109
CBM32	1.57506	1.74869	1.48477	1.19593	1.6665	1.5312	1.83241	1.67987	1.81473	1.93822	2.04384	1.70852	CBM32	1.83627	1.53369	0.328468	0.0104
CBM35	3.49088	3.60463	3.30495	6.02214	4.84125	6.15153	10.5213	9.15729	12.2745	8.45965	12.8396	8.48745	CBM35	10.2899	4.56923	3.21163	0.0039
CBM37	0.344696	0.469746	0.276954	0.461563	0.381334	0.345326	0.349144	0.443524	0.216032	0.235982	0.431572	0.19054	CBM37	0.31113	0.37994	0.186526	0.2623
CBM4	2.16938	2.36745	2.5226	2.77625	2.40689	3.3886	6.60148	4.89278	6.8107	4.81829	6.06331	4.50086	CBM4	5.61457	2.60519	1.43272	0.0039
CBM48	5.8192	3.44963	3.51373	3.1341	3.50448	4.41732	2.92343	3.38318	2.97293	3.50404	3.21724	3.83116	CBM48	3.30533	3.97308	1.34378	0.1093
CBM51	1.71504	1.30563	1.37231	1.7608	1.66941	1.97807	3.18786	3.14489	3.63753	3.40125	3.50037	2.6741	CBM51	3.25767	1.63354	0.593585	0.0039
CBM6	2.48145	2.32118	2.65874	2.68012	1.82702	2.55774	3.2864	3.0381	3.56838	2.63471	2.84047	2.96033	CBM6	3.05473	2.42104	0.650364	0.0104
CBM62	0.312931	0.418103	0.191545	0.309802	0.266718	0.352312	0.443648	0.253783	0.347737	0.326638	0.289247	0.452057	CBM62	0.35219	0.30857	0.157469	0.4233
CBM67	0.076704	0.127256	0.143803	0.076255	0.053514	0.067845	0.192617	0.074689	0.106829	0.066834	0.049797	0.135384	CBM67	0.10436	0.0909	0.08892	1
CBM74	0.209928	0.460743	0.34847	0.700626	0.428391	0.530516	0.337228	0.417342	0.383741	0.384882	0.664393	0.673356	CBM74	0.47682	0.44645	0.316943	0.8728
CBM9	0.200927	0.37863	0.370458	0.175319	0.473985	0.288259	0.477525	0.798308	0.45688	0.437216	0.570079	0.265575	CBM9	0.50093	0.3146	0.290732	0.0547
CBM91	0.019718	0.032713	0.092416	0.084009	0.016508	0.104642	0.192233	0.230397	0.065908	0.103083	0.15361	0.112437	CBM91	0.14294	0.05833	0.10072	0.025
CE1	49.6895	32.3892	33.7418	35.0198	31.1734	39.8229	21.9878	32.129	22.8563	23.8176	20.197	22.3276	CE1	23.8859	36.9727	11.1206	0.0065
CE11	15.0738	12.5785	11.6917	16.7115	19.6699	16.9988	17.9855	17.5011	19.2542	24.4291	22.5022	15.7558	CE11	19.5713	15.454	6.25248	0.0547
CE12	8.69002	5.63382	4.84099	6.33278	5.50152	6.53241	6.63913	6.07967	6.37412	6.41556	6.27486	6.2188	CE12	6.33369	6.25526	1.53027	0.5218
CE15	21.7833	19.4242	18.7071	22.9984	21.9254	23.8885	32.8951	26.8573	35.0372	29.2401	34.0826	25.4342	CE15	30.5911	21.4545	6.00601	0.0039
CE17	1.15293	1.48642	0.989594	2.15425	2.75613	1.29533	0.726363	1.06854	1.09112	1.02878	1.67733	1.17683	CE17	1.12816	1.63911	0.990028	0.1495
CE19	0.438245	0.620741	0.448766	0.694025	0.614713	0.682046	0.42987	0.498811	0.556988	0.41467	0.596899	0.350971	CE19	0.4747	0.58309	0.205689	0.0547
CE2	4.11536	4.70652	4.16094	3.87713	3.65051	5.21524	4.7531	4.75885	5.11908	5.15058	4.97074	4.02528	CE2	4.79627	4.28762	0.989731	0.1495
CE20	17.489	31.3397	47.0683	30.6775	48.0475	32.7092	38.6007	29.4375	32.1044	35.5829	34.8962	31.3302	CE20	33.6587	34.5552	14.8035	1
CE3	2.00841	2.06111	1.37771	1.41808	1.24173	1.03816	0.825407	1.36807	1.30538	1.08401	0.949044	0.814017	CE3	1.05765	1.5242	0.655609	0.0374
CE4	9.97107	12.6452	12.7042	14.4138	13.9109	13.88	22.2597	20.7111	26.4791	18.8711	19.8249	17.2732	CE4	20.9032	12.9209	4.81694	0.0039
CE6	13.8108	8.95073	10.2145	10.7342	11.1496	10.8855	13.5781	12.1615	14.1665	14.9416	14.8275	14.3793	CE6	14.0091	10.9576	2.63039	0.0104
CE7	1.39001	1.15972	0.84755	1.77108	1.62179	1.45029	2.63031	2.9084	2.40844	2.6645	2.47182	1.68963	CE7	2.46218	1.37341	0.747804	0.0065
CE8	0.795875	1.43925	1.32329	1.53379	2.00396	1.86552	2.74161	2.91262	2.66399	4.03578	2.98801	2.05628	CE8	2.89972	1.49362	1.07538	0.0039
CE9	8.57196	7.74734	6.68904	6.19318	6.35746	5.98441	5.92318	6.11379	4.80854	5.12634	4.74821	5.51745	CE9	5.37292	6.9239	1.5916	0.0065
GH1	166.416	194.699	186.696	167.647	184.112	181.272	122.088	184.695	109.267	146.793	118.161	121.961	GH1	133.828	180.14	38.9705	0.025
GH10	67.719	66.8401	64.4041	61.8208	63.1046	66.4057	75.4013	73.0055	64.5834	80.2367	62.5744	71.1266	GH10	71.1547	65.049	8.9595	0.1093
GH103	0.298614	0.206422	0.361558	0.296863	1.18749	0.50938	0.209521	0.36346	0.301521	0.477012	0.57189	0.770312	GH103	0.44895	0.47672	0.565149	0.5218
GH104	2.4944	3.48265	4.33352	6.67105	6.6441	2.06281	2.48874	1.57038	1.27825	2.4701	2.34034	4.31905	GH104	2.41114	4.28142	3.06499	0.0547
GH105	13.8804	13.6083	13.6673	13.3809	12.7698	13.6274	15.0453	16.2517	17.7025	16.6653	19.3483	13.6481	GH105	16.4435	13.489	2.38049	0.0104
GH106	7.70097	6.67734	5.65711	6.87666	6.22476	7.07978	5.99337	6.93713	6.10455	7.22293	5.73911	5.03854	GH106	6.17261	6.70277	1.50569	0.3367
GH109	20.0093	18.8515	17.6149	20.377	20.6866	19.5278	18.6403	19.1277	20.1011	25.9616	24.558	19.574	GH109	21.3271	19.5112	4.24839	0.5218
GH11	46.0414	48.4686	43.7912	41.9431	39.8129	47.3557	30.0829	47.8566	28.9162	39.147	25.267	32.778	GH11	34.008	44.5688	11.5397	0.0374
GH110	0.144966	0.264554	0.231011	0.444701	0.291274	0.142876	0.025696	0.155273	0.205937	0.151574	0.135522	0	GH110	0.11233	0.25323	0.192923	0.0547
GH112	0.824218	0.455803	0.515073	0.790123	0.977542	0.546764	0.441342	0.802563	0.57396	0.73312	0.695611	0.685412	GH112	0.65533	0.68492	0.336684	0.7488
GH113	0.413372	0.184403	0.224016	0.216598	0.138743	0.188866	0.236877	0.361194	0.143951	0.31879	0.192099	0.200871	GH113	0.2423	0.22767	0.178191	0.5218
GH115	5.97698	6.80763	7.83326	8.06818	7.89746	7.71777	6.11321	7.50172	6.38803	8.14887	5.77483	6.2492	GH115	6.69598	7.38355	1.74054	0.2623
GH116	1.90179	2.23364	1.8976	2.13382	2.16929	2.08507	0.720455	0.94733	0.814751	0.685448	0.567667	0.693062	GH116	0.73812	2.0702	0.270146	0.0039
GH120	46.4307	55.6329	55.959	51.5284	53.8572	51.9266	24.1503	35.3243	24.8917	28.5429	29.9458	36.9807	GH120	29.9726	52.5558	8.79546	0.0039
GH123	1.70174	3.07648	2.70627	2.48628	1.89617	3.23504	2.07408	2.12908	3.07207	1.78221	2.8811	2.97626	GH123	2.4858	2.517	1.17254	0.8728
GH125	5.98839	5.8538	5.47865	5.21495	5.04308	5.18256	7.61168	5.49393	7.40975	5.97601	5.73018	6.19211	GH125	6.40228	5.46024	1.27835	0.0374
GH127	19.9106	22.1417	20.8631	26.4829	28.6072	24.6628	16.5882	17.3909	15.6295	17.5644	16.689	17.4866	GH127	16.8914	23.7781	4.13862	0.0039
GH13	337.769	329.537	327.272	343.281	331.633	311.12	261.259	297.089	271.454	314.734	303.618	262.308	GH13	285.077	330.102	33.9593	0.0065
GH130	13.9621	15.2389	13.5724	15.4021	13.8804	15.6585	16.362	17.4961	17.2067	16.5315	17.5907	13.7878	GH130	16.4958	14.6191	2.32933	0.0374
GH133	19.5648	15.232	15.4304	18.9934	19.4981	19.6764	17.1187	17.7108	18.3331	19.7106	18.1565	14.9032	GH133	17.6555	18.0659	3.73207	0.5218
GH140	1.42978	0.622847	0.70306	0.72095	0.8277	0.85206	0.876387	0.600675	1.39871	1.21163	1.1691	0.870303	GH140	1.02113	0.8594	0.582129	0.2623
GH141	0.524506	0.465533	0.583627	0.650418	0.713629	0.640644	1.00664	0.665981	1.41537	0.953984	1.41445	0.824313	GH141	1.04679	0.59639	0.399106	0.0065
GH144	0.663414	0.732813	0.70786	1.09597	2.10179	0.977424	1.08953	1.61974	1.69984	2.05606	2.72637	1.5205	GH144	1.78534	1.04655	1.10058	0.0547
GH146	6.36606	7.57644	6.64584	6.73046	7.0573	6.90817	7.58655	6.75073	7.73548	6.70649	7.91902	6.90778	GH146	7.26767	6.88071	0.954103	0.2002
GH148	0.682265	0.594975	0.606748	0.819882	0.629771	0.729459	0.248076	0.442893	0.233899	0.2134	0.272572	0.256517	GH148	0.27789	0.67718	0.169426	0.0039
GH149	0.04279	0.017748	0	0.036462	0.089558	0.056771	0.094811	0.072915	0.035757	0.055926	0.208345	0.061001	GH149	0.08813	0.04055	0.093186	0.1093
GH15	0.258522	0.264908	0.149677	0.149021	0.782978	0.409286	0.168475	0.207307	0.298633	0.298132	0.325794	0.396418	GH15	0.28246	0.33573	0.321598	0.7488
GH154	25.5716	26.8412	27.2605	25.7055	22.8188	27.2263	11.1642	18.4674	12.9613	12.3885	10.3241	14.4541	GH154	13.2933	25.904	4.59331	0.0039
GH16	12.1997	8.8427	7.23438	9.50254	8.27186	9.83528	11.63	11.7822	10.7464	11.5516	9.89457	12.0787	GH16	11.2806	9.31442	2.5005	0.0547
GH163	0.871041	0.768547	0.824873	0.730018	0.970725	1.0279	0.471738	0.487555	0.252488	0.588741	0.173061	0.493055	GH163	0.41111	0.86552	0.276663	0.0039
GH166	0.406766	0.418401	0.244029	0.138645	0.217946	0.209702	0.086523	0.063373	0.203946	0.141769	0.101404	0.172307	GH166	0.12822	0.27258	0.167881	0.0163
GH171	12.4844	11.278	11.928	14.5137	15.7497	14.6261	8.48656	9.70657	8.74943	10.245	10.2598	9.05629	GH171	9.41728	13.43	2.5402	0.0039
GH172	3.28342	3.04896	2.56757	2.81339	3.23659	2.54325	1.83416	1.54733	1.48714	2.20135	1.95711	1.77975	GH172	1.80114	2.91553	0.588667	0.0039
GH173	0.964654	1.37706	1.49699	0.868795	1.12662	1.39625	1.56908	0.856777	1.73643	1.4103	1.26945	1.13211	GH173	1.32902	1.20506	0.571091	0.4233
GH18	11.0394	8.64361	8.96977	10.2342	11.2486	10.2821	12.4614	12.0345	11.5294	13.0188	13.8321	10.6606	GH18	12.2561	10.0696	2.17893	0.0104
GH2	72.8011	49.8003	48.4461	59.5309	51.7417	50.8269	51.4598	51.6025	46.7893	60.2422	46.2004	47.0496	GH2	50.5573	55.5245	14.6282	0.2623
GH20	19.9805	18.6522	16.2311	27.2312	47.3666	15.2545	12.2943	15.7863	12.621	19.6187	27.5781	12.0139	GH20	16.652	24.1194	18.2426	0.1495
GH23	10.8403	8.88009	8.11569	10.7589	12.5133	11.2808	15.763	12.7906	19.3316	15.9782	19.7244	12.2632	GH23	15.9752	10.3982	4.75787	0.0065
GH25	2.3932	2.11695	3.23117	2.91051	2.70025	3.42416	3.90932	3.9248	4.8367	4.20455	4.32398	4.59566	GH25	4.29917	2.79604	0.864292	0.0039
GH26	11.7002	10.1722	10.0363	8.91135	9.42804	10.7261	14.527	13.0757	13.358	15.8352	11.8202	11.0803	GH26	13.2827	10.1624	2.71804	0.0065
GH27	15.7238	12.8173	10.9986	13.2893	12.8728	12.0165	12.2317	11.7669	12.4851	14.807	15.7224	11.6087	GH27	13.1036	12.953	3.30955	0.7488
GH28	17.5651	19.3893	20.3427	23.9348	24.6216	20.3983	25.3754	23.2695	26.895	30.0418	28.9088	28.053	GH28	27.0906	21.0419	5.18754	0.0104
GH29	40.0081	37.2888	37.9021	42.4308	40.3746	40.8782	18.0873	24.3258	17.2725	21.9245	19.1741	18.6275	GH29	19.902	39.8138	4.60054	0.0039
GH3	201.235	203.65	190.856	215.172	221.245	208.536	184.674	204.752	202.597	235.516	222.194	181.848	GH3	205.264	206.782	31.6288	0.8728
GH30	6.95263	5.74472	5.02376	5.48802	6.18479	6.37919	6.41986	5.47823	5.92887	6.35072	6.53329	5.39345	GH30	6.0174	5.96218	1.18201	0.8728
GH31	71.3612	70.8248	70.1866	70.1964	65.7932	69.1126	67.6995	72.8183	71.2465	74.0641	74.9102	63.9328	GH31	70.7786	69.5791	6.21071	0.3367
GH32	15.0134	15.3935	14.7082	16.7963	16.6088	16.0776	15.3498	15.9351	17.2781	15.3788	19.237	16.5949	GH32	16.6289	15.7663	2.33623	0.4233
GH33	2.06234	1.77829	2.17298	2.36568	2.15289	1.76291	2.4771	2.5413	1.73685	2.25983	2.5776	1.58633	GH33	2.1965	2.04918	0.668771	0.4233
GH35	9.35649	7.29628	8.27136	10.1161	8.12292	8.43624	10.7189	11.0359	11.4631	10.8412	10.9445	9.86707	GH35	10.8118	8.59989	1.52127	0.0065
GH36	36.4049	33.1838	30.6243	34.2305	33.9744	34.7318	30.3564	32.5754	27.5002	30.3182	33.5116	25.6566	GH36	29.9864	33.8583	4.8906	0.0163
GH38	14.5753	18.976	17.9089	24.3221	26.8235	20.7657	24.7934	23.4849	24.3723	26.5785	27.5129	19.4687	GH38	24.3684	20.5619	7.26407	0.1093
GH39	19.8853	13.6877	11.5984	13.803	13.3865	11.089	16.7021	16.0194	17.5026	16.4916	19.644	12.6516	GH39	16.5019	13.9083	5.42045	0.1495
GH4	18.6326	24.4005	23.8727	24.1296	24.8695	24.0896	27.4918	25.7619	26.2206	26.2503	34.4124	23.4546	GH4	27.2653	23.3324	6.07037	0.0374
GH42	1.40816	2.10997	1.45117	2.18059	1.93124	2.12591	3.72894	4.02971	4.6988	4.09854	4.83436	2.90452	GH42	4.04914	1.86784	1.05044	0.0039
GH43	137.257	140.952	126.035	138.259	142.319	140.41	135.45	136.677	152.441	154.327	162.173	123.654	GH43	144.12	137.539	20.41	0.7488
GH44	5.77849	5.60198	4.72258	5.58481	5.57152	5.16672	5.83015	5.63151	6.99586	6.08745	8.41124	4.58053	GH44	6.25612	5.40435	1.70153	0.0782
GH45	4.61074	3.19846	2.59948	3.88399	4.01734	3.79362	5.95775	5.33034	6.0834	6.76956	5.75861	5.13941	GH45	5.83984	3.68394	1.27983	0.0039
GH48	25.4347	28.7967	29.3819	21.9833	23.5289	24.5457	21.4953	29.9991	19.837	27.2787	19.8208	20.9557	GH48	23.2311	25.6119	7.25865	0.2002
GH5	119.546	114.56	119.062	136.34	141.31	145.003	169.497	166.118	183.881	185.843	182.668	154.098	GH5	173.684	129.304	25.674	0.0039
GH50	0.066572	0.149102	0.099846	0.0624	0.139334	0.111036	0.283211	0.291704	0.422792	0.40024	0.461578	0.238616	GH50	0.34969	0.10472	0.126035	0.0039
GH51	33.9809	32.8802	30.5224	31.3842	31.6055	31.4187	31.4878	33.4834	34.7955	32.9688	35.8205	31.5407	GH51	33.3495	31.9653	2.98248	0.1093
GH53	13.3723	9.47015	10.7139	11.3483	9.41704	15.3514	6.19345	14.6547	4.80888	9.93722	4.48859	7.07766	GH53	7.86008	11.6122	6.20066	0.0782
GH54	3.86262	3.7965	3.1113	3.99201	3.82552	3.61897	2.50505	2.89317	2.85372	4.1743	2.78943	2.64406	GH54	2.97662	3.70115	0.917092	0.0547
GH55	0.272885	0.369329	0.296187	0.611921	0.336673	0.097998	0.229126	0.44752	0.396059	0.412969	0.223778	0.339295	GH55	0.34146	0.33083	0.262636	0.631
GH57	82.9177	85.6367	91.5062	81.8971	64.3738	98.3632	125.02	106.769	97.779	96.5243	74.5291	145.318	GH57	107.657	84.1158	36.1105	0.0782
GH6	11.166	13.5713	12.4088	14.1221	16.1976	15.2499	10.9339	16.1697	9.70132	14.6334	9.08937	11.2415	GH6	11.9615	13.7859	4.65799	0.2002
GH63	0.965152	1.10271	0.758338	1.06852	1.23793	0.913145	1.23587	0.836114	1.39254	1.38243	1.63981	1.58177	GH63	1.34476	1.00763	0.455497	0.0547
GH64	1.09294	0.592701	0.979136	0.500578	0.60417	0.535444	0.450452	0.614864	0.239015	0.585664	0.276818	0.245995	GH64	0.40213	0.7175	0.424227	0.0547
GH65	3.60966	3.65183	3.30514	3.34728	3.58068	3.0437	2.50825	3.27245	3.43	4.43474	4.0907	3.85744	GH65	3.59893	3.42305	0.917686	0.5218
GH67	4.21956	4.26048	3.96191	4.0044	4.17888	4.23498	5.85043	5.48698	6.86871	6.68551	5.78895	4.22169	GH67	5.81704	4.14337	1.078	0.0104
GH73	5.22334	15.1429	12.9156	8.45003	9.08473	9.79363	15.1085	10.1852	13.9229	11.7113	15.7636	15.5462	GH73	13.7063	10.1017	5.77324	0.0547
GH74	3.45188	2.69247	2.71993	4.03362	5.1555	3.46682	5.91269	4.25841	5.71256	5.44787	6.03145	4.95497	GH74	5.38632	3.58671	1.59391	0.0104
GH76	1.41883	0.975879	1.32109	1.37061	1.44563	1.13339	2.15855	2.00935	1.61418	1.42614	1.67428	1.52313	GH76	1.73427	1.27757	0.472172	0.0065
GH77	75.3761	77.467	69.5027	67.2548	67.977	65.5995	68.3097	65.5606	71.9536	68.4794	75.2847	74.3954	GH77	70.6639	70.5295	8.6082	1
GH78	23.4531	21.0418	17.4776	17.851	22.7214	14.944	13.5289	15.9949	16.5777	15.5183	18.0333	17.4042	GH78	16.1762	19.5815	4.93083	0.0782
GH8	11.3299	15.6658	8.24442	11.8123	10.8794	10.9587	18.1382	13.4617	12.5325	14.3248	13.0851	11.4217	GH8	13.8273	11.4818	4.72105	0.0547
GH87	4.89994	5.24051	7.36634	9.13845	6.91439	8.92496	5.84498	4.44112	4.33924	4.57821	3.20506	5.2719	GH87	4.61342	7.08076	2.6814	0.025
GH88	1.16842	1.13891	0.776886	0.936962	1.10117	1.10027	0.938236	0.948933	0.881604	0.801313	0.804482	1.09891	GH88	0.91225	1.0371	0.261733	0.1495
GH89	5.00522	4.59211	5.35597	4.71895	3.90439	4.22788	5.70352	5.16508	5.19147	5.23414	4.67314	5.25688	GH89	5.20404	4.63409	0.850175	0.0782
GH9	35.0198	34.1836	29.9383	35.3203	37.7751	34.4504	47.1391	48.0075	53.3879	50.5018	54.5684	38.6238	GH9	48.7048	34.4479	8.28102	0.0039
GH92	20.5627	17.7932	17.1068	20.727	21.395	21.9735	20.556	23.0725	22.9161	24.4079	22.5216	22.4016	GH92	22.6459	19.9263	3.24388	0.025
GH94	52.2286	34.0857	32.1628	41.9187	47.3776	37.6529	40.5747	43.4816	44.0498	51.2045	50.386	36.4546	GH94	44.3585	40.9044	13.4777	0.4233
GH95	9.45522	9.16154	8.45637	9.43637	10.1942	9.23157	9.88563	9.53597	10.9253	10.343	11.27	8.71274	GH95	10.1121	9.32254	1.49893	0.0782
GH97	20.0609	16.3982	15.7104	16.939	15.5772	17.1344	15.4909	15.0438	16.148	15.3802	16.1675	14.8466	GH97	15.5128	16.97	2.18948	0.025
GH98	0.825831	0.650335	0.580323	0.672373	0.541138	0.600895	0.824851	0.86414	0.551469	0.727786	0.588622	0.589763	GH98	0.69111	0.64515	0.234143	0.631
GT1	0.956637	1.14196	0.807202	0.86341	0.912868	0.626732	0.803907	0.753214	0.833254	0.438924	1.28866	1.01899	GT1	0.85616	0.8848	0.453762	0.631
GT105	0.365219	0.381307	0.301033	0.702906	0.579888	0.472618	0.005581	0.110366	0.010524	0.03292	0.009811	0.010259	GT105	0.02991	0.46716	0.191377	0.0039
GT11	0.629445	0.391603	0.231799	0.402272	0.602248	0.494251	0.079696	0.197006	0.206639	0.489686	0.455339	0.32963	GT11	0.293	0.4586	0.3088	0.0782
GT111	3.78465	2.77662	2.34376	2.86238	2.61991	2.8334	3.10572	3.5088	3.91341	4.42248	4.0553	3.33236	GT111	3.72301	2.87012	0.98011	0.0163
GT112	1.60637	1.49808	1.58261	1.61091	1.04822	1.56826	1.03913	1.58673	0.816566	0.83137	0.605309	1.0935	GT112	0.99543	1.48574	0.556481	0.0374
GT113	0.222252	0.149794	0.208336	0.248568	0.197697	0.273809	0.307781	0.392248	0.475915	0.338892	0.432861	0.452626	GT113	0.40005	0.21674	0.109129	0.0039
GT19	5.06558	3.80105	3.97977	4.90716	4.72969	4.6831	5.30228	5.12201	5.07996	4.66307	4.65086	4.18354	GT19	4.83362	4.52772	0.927042	0.3367
GT2	274.641	248.523	227.23	262.746	260.732	265.816	268.776	275.159	284.66	306.588	298.921	228.535	GT2	277.107	256.615	44.3847	0.0547
GT20	0.327272	0.254511	0.172564	0.244015	1.06171	0.341162	0.33538	0.268881	0.247843	0.436649	0.422276	0.499879	GT20	0.36848	0.40021	0.430174	0.3367
GT26	2.61241	2.60245	2.5681	3.50718	3.6451	3.65875	5.9243	6.11922	6.44737	8.00017	5.99934	4.43082	GT26	6.15354	3.099	1.6994	0.0039
GT28	12.2405	10.6363	10.8628	12.8834	12.9897	13.6334	11.1108	11.1894	11.4556	13.4262	12.4572	12.4079	GT28	12.0078	12.2077	2.1263	0.8728
GT3	110.515	91.825	85.3208	113.631	121.274	81.5394	52.9361	77.5456	38.9413	91.0796	47.9127	119.96	GT3	71.3959	100.684	47.3031	0.0782
GT30	6.55467	5.31952	4.6831	6.15911	7.1086	5.89128	6.88635	6.60037	7.72106	7.57784	7.31992	6.33762	GT30	7.07386	5.95271	1.42095	0.025
GT32	1.19076	1.10881	0.854768	1.21475	1.27953	1.38887	0.94391	1.25901	1.32654	1.99882	1.57125	1.00967	GT32	1.35153	1.17291	0.57161	0.4233
GT35	46.085	52.5775	48.7836	58.4485	54.4947	50.6897	55.9513	56.7446	59.2017	65.3527	68.0521	68.8481	GT35	62.3584	51.8465	10.1225	0.0104
GT39	0.397679	0.499814	0.365508	0.179348	0.489661	0.474446	0.628358	0.463791	0.383271	0.48259	0.308142	0.221998	GT39	0.41469	0.40108	0.264107	0.8728
GT4	95.7886	80.3818	81.3618	105.137	115.788	104.942	105.022	107.203	118.263	124.22	119.843	95.8176	GT4	111.728	97.2332	24.9713	0.0547
GT41	0.348902	0.266056	0.275105	0.44519	1.01015	0.282425	0.467881	0.259233	0.372803	0.365751	0.586812	0.709837	GT41	0.46039	0.43797	0.452856	0.4233
GT5	145.789	152.297	148.863	168.013	156.034	167.381	173.959	156.59	233.815	161.729	237.889	167.808	GT5	188.632	156.396	46.46	0.0374
GT51	61.174	71.4797	63.8437	78.164	91.7249	75.822	76.7507	86.681	83.8902	88.1909	85.8175	78.8555	GT51	83.3643	73.7014	15.6052	0.0782
GT66	0.217271	0.254259	0.222153	0.233992	0.189741	0.285042	0.970386	0.505039	1.24778	0.684949	1.52255	1.09644	GT66	1.00452	0.23374	0.403994	0.0039
GT8	5.38942	4.59474	3.90033	5.38921	4.82626	5.2619	5.62846	4.86485	5.47921	5.39665	5.00769	4.58653	GT8	5.16057	4.89364	0.988499	0.2623
GT81	4.29738	4.50645	3.70111	4.07786	4.90736	4.82321	1.0295	3.03729	1.28947	1.56338	1.09702	1.72494	GT81	1.6236	4.38556	1.20032	0.0039
GT83	2.0682	1.37474	1.32859	0.847255	3.39153	1.41417	1.26006	1.21878	1.1543	1.33732	1.47618	1.96418	GT83	1.4018	1.73741	1.19592	0.4233
GT9	3.93755	4.07352	4.6427	5.48528	5.23254	6.04483	7.61174	7.4943	8.00465	8.40185	7.80598	6.82991	GT9	7.6914	4.90274	1.35916	0.0039
PL1	11.0489	9.40825	9.77488	11.772	12.0641	11.7168	16.7202	15.6967	16.8724	17.8493	18.4696	15.4501	PL1	16.8431	10.9642	2.29711	0.0039
PL10	0.344224	0.486476	0.358523	0.434548	0.672424	0.618596	1.59321	1.77521	1.59804	2.71047	1.48981	0.945091	PL10	1.68531	0.4858	0.711572	0.0039
PL11	45.3261	61.4451	55.5964	65.6211	124.412	34.807	25.9375	28.8116	29.0052	64.9919	74.2823	52.9624	PL11	45.9985	64.5346	52.3525	0.2623
PL12	0.466878	0.581601	0.298263	0.56893	0.539429	0.654981	0.396634	0.558709	0.334365	0.41405	0.411209	0.473752	PL12	0.43145	0.51835	0.200498	0.1495
PL14	0.227633	0.103211	0.321791	0.327456	0.200392	0.288017	0.581296	0.308648	0.631256	0.661408	0.605026	0.42753	PL14	0.53586	0.24475	0.223848	0.0104
PL33	0.59007	0.931465	0.864668	0.577308	0.611418	0.736006	0.833281	0.740478	1.25614	0.715952	0.836736	0.854008	PL33	0.87277	0.71849	0.347706	0.2623
PL35	0.225547	0.118166	0.111276	0.151731	0.218641	0.179996	0.178858	0.335212	0.357114	0.330988	0.332927	0.251427	PL35	0.29775	0.16756	0.117589	0.0163
PL38	0.192554	0.292834	0.140387	0.154964	0.161205	0.105432	0.199102	0.229161	0.330753	0.167777	0.141675	0.244002	PL38	0.21875	0.17456	0.131188	0.1495
PL4	1.36144	1.41611	1.1676	1.55387	1.50146	1.61458	1.47266	2.53361	1.66152	1.91013	1.66235	1.48303	PL4	1.78722	1.43584	0.558807	0.0547
PL8	0.438612	0.625345	0.379027	0.630702	0.504904	0.40527	0.510218	0.340336	0.515423	0.513543	0.448479	0.53037	PL8	0.47639	0.49731	0.182142	0.8728
PL9	3.87283	3.44893	2.76329	2.66117	3.15336	2.84996	3.23823	4.45257	3.88553	3.80067	4.25965	3.10521	PL9	3.79031	3.12492	1.00324	0.0547

## Sheet: cazy database
# Copyright disclosure: This data is parsed from webpages of www.cazy.org.
AA10	AA10 (formerly CBM33) proteins are copper-dependent lytic polysaccharide monooxygenases (LPMOs); some proteins have been shown to act on chitin, others on cellulose; lytic cellulose monooxygenase (C1-hydroxylating) (EC 1.14.99.54); lytic cellulose monooxygenase (C4-dehydrogenating)(EC 1.14.99.56); lytic chitin monooxygenase (EC 1.14.99.53); lytic xylan monooxygenase / xylan oxidase (glycosidic bo…
AA11	AA11 proteins are copper-dependent lytic polysaccharide monooxygenases (LPMOs); cleavage of chitin chains with oxidation of C-1 has been demonstrated for a AA11 LPMO from Aspergillus oryzae;
AA12	The pyrroloquinoline quinone-dependent oxidoreductase activity was demonstrated for the CC1G_09525 protein of Coprinopsis cinerea.
AA13	AA13 proteins are copper-dependent lytic polysaccharide monooxygenases (LPMOs); cleavage of starch with oxidation of C-1 at the site of cleavage has been demonstrated for the LPMO encoded by gene NCU08746 from Neurospora crassa;; lytic starch monooxygenase / starch oxidase (glycosidic bond-cleaving) (EC 1.14.99.55)
AA14	AA14 proteins are copper-dependent lytic polysaccharide monooxygenases (LPMOs); cleavage of xylan with oxidation of C-1 has been demonstrated for two AA14 LPMOs from Trametes coccinea (Pycnoporus coccineus); lytic xylan monooxygenase / xylan oxidase (glycosidic bond-cleaving) (EC 1.14.99.-)
AA15	lytic cellulose monooxygenase (C1-hydroxylating) (EC 1.14.99.54); lytic chitin monooxygenase (EC 1.14.99.53)
AA16	Lytic cellulose monooxygenase (C1-hydroxylating) (EC 1.14.99.54)
AA1	Laccase / p-diphenol:oxygen oxidoreductase / ferroxidase (EC 1.10.3.2); ; ferroxidase (EC 1.10.3.-); Laccase-like multicopper oxidase (EC 1.10.3.-)
AA2	manganese peroxidase (EC 1.11.1.13); versatile peroxidase (EC 1.11.1.16); lignin peroxidase (EC 1.11.1.14); peroxidase (EC 1.11.1.-); cytochrome-c peroxidase (EC 1.11.1.5); ascorbate peroxidase (EC 1.11.1.11)
AA3	cellobiose dehydrogenase (EC 1.1.99.18); glucose 1-oxidase (EC 1.1.3.4); aryl alcohol oxidase (EC 1.1.3.7); alcohol oxidase (EC 1.1.3.13); pyranose oxidase (EC 1.1.3.10)
AA4	vanillyl-alcohol oxidase (EC 1.1.3.38)
AA5	Oxidase with oxygen as acceptor (EC 1.1.3.-); galactose oxidase (EC 1.1.3.9); glyoxal oxidase (EC 1.2.3.15); alcohol oxidase (EC 1.1.3.13); raffinose oxidase (EC 1.1.3.-)
AA6	1,4-benzoquinone reductase (EC. 1.6.5.6)
AA7	glucooligosaccharide oxidase (EC 1.1.3.-); chitooligosaccharide oxidase (EC 1.1.3.-)
AA8	Iron reductase domain
AA9	AA9 (formerly GH61) proteins are copper-dependent lytic polysaccharide monooxygenases (LPMOs); cleavage of cellulose chains with oxidation of carbons C1 and/or C4 and C-6); lytic cellulose monooxygenase (C1-hydroxylating) (EC 1.14.99.54); lytic cellulose monooxygenase (C4-dehydrogenating) (EC 1.14.99.56)
CBM0	Carbohydrate-binding modules not yet assigned to a family.
CBM10	Modules of approx. 50 residues. The cellulose-binding function has been demonstrated in one case.
CBM11	Modules of approx. 180-200 residues. The CBM11 of Clotridium thermocellum Cel26A-Cel5E has been shown to bind both beta-1,4-glucan and beta-1,3-1,4-mixed linked glucans.
CBM12	Modules of approx. 40-60 residues. The majority of these modules is found among chitinases where the function is chitin-binding. Distantly related to the CBM5 family.
CBM13	Modules of approx. 150 residues which always appear as a threefold internal repeat. The only apparent exception to this, xylanase II of Actinomadura sp. FC7 (GenBank U08894), is in fact not completely sequenced. These modules were first identified in several plant lectins such as ricin or agglutinin of Ricinus communis which bind galactose residues. The three-dimensional structure of a plant lect…
CBM14	Modules of approx. 70 residues. The chitin-binding function has been demonstrated in several cases. These modules are found attached to a number of chitinase catalytic domains, but also in non-catalytic proteins either in isolation or as multiple repeats; chitin binding (EC IIa.chitin)
CBM15	Binding to xylan and xylooligosaccharides has been demonstrated in the case of Xyn10C of Cellvibrio mixtus.
CBM16	Carbohydrate-binding module 16. Binding to cellulose and glucomannan demonstrated [B. Bae et al (2008) J Biol Chem. 283:12415-25 (PMID: 18025086)]
CBM17	Modules of approx. 200 residues. Binding to amorphous cellulose, cellooligosaccharides and derivatized cellulose has been demonstrated.
CBM18	Modules of approx. 40 residues. The chitin-binding function has been demonstrated in many cases. These modules are found attached to a number of chitinase catalytic domains, but also in non-catalytic proteins either in isolation or as multiple repeats.
CBM19	Modules of 60-70 residues with chitin-binding function.
CBM1	Modules of approx. 40 residues found almost exclusively in fungi. The cellulose-binding function has been demonstrated in many cases, and appears to be mediated by three aromatic residues separated by about 10.4 angstrom and which form a flat surface. The only non-fungal occurence of CBM1 is in an algal non-hydrolytic polysaccharide-binding protein which is composed of four repeated CBM1 modules.…
CBM20	The granular starch-binding function has been demonstrated in several cases. Interact strongly with cyclodextrins. Often designated as starch-binding domains (SBD).
CBM21	Modules of approx. 100 residues. The granular starch-binding function has been demonstrated in one case. Sometimes designated as starch-binding domains (SBD).
CBM22	A xylan binding function has been demonstrated in several cases and affinity with mixed beta-1,3/beta-1,4-glucans in one. In several cases a thermostabilizing effect has also been seen.
CBM23	Mannan-binding function demonstrated in one case.
CBM24	alpha-1,3-glucan (mutan)-binding function demonstrated in two cases (PMID:10636904)
CBM25	Starch-binding function demonstrated in one case.
CBM26	Starch-binding function demonstrated in two cases.
CBM27	Mannan-binding function demonstrated in two cases
CBM28	The module from the endo-1,4-glucanase of Bacillus sp. 1139 binds to non-crystalline cellulose, cellooligosaccharides, and beta-(1,3)(1,4)-glucans
CBM29	Binding to mannan/glucomannan has been demonstrated.
CBM2	Modules of approx. 100 residues and which are found in a large number of bacterial enzymes. The cellulose-binding function has been demonstrated in many cases. Several of these modules have been shown to also bind chitin or xylan.
CBM30	Binding to cellulose has been demonstrated for the N-terminal module of Fibrobacter succinogenes CelF.
CBM31	Binding to beta-1,3-xylan has been demonstrated for the C-terminal module of the beta-1,3-xylanase of Alcaligenes sp. XY234.
CBM32	Binding to galactose and lactose has been demonstrated for the module of Micromonospora viridifaciens sialidase (PMID: 16239725). Binding to polygalacturonic acid has been shown for a Yersinia member (PMID: 17292916). Binding to LacNAc (beta-D-galactosyl-1,4-beta-D-N-acetylglucosamine) has been shown for an N-acetylglucosaminidase from Clostridium perfingens (PMID: 16990278).
CBM33	Copper-dependent lytic polysaccharide monooxygenases now reclassified in family AA10
CBM34	Modules of approx. 120 residues. Granular starch-binding function has been demonstrated in the case of Thermoactinomyces vulgaris R-47 alpha-amylase 1 (TVAI).
CBM35	Modules of approx. 130 residues. A module that is conserved in three Cellvibrio xylan-degrading enzymes binds to xylan and the interaction is calcium dependent, while a module from a Cellvibrio mannanase binds to decorated soluble mannans and mannooligosaccharides. A module in a	Phanerochaete chrysosporium galactan 1,3-beta-galactosidase binds to beta-galactan.
CBM36	Modules of approx. 120-130 residues displaying structural similarities to CBM6 modules. The only CBM36 currently characterised, that from Paenbacillus polymyxa xylanase 43A, shows calcium-dependent binding of xylans and xylooligosaccharides. X-ray crystallography shows that there is a direct interaction between calcium and ligand.
CBM37	Modules of approx. 100 residues, conserved in numerous R. albus polysaccharide-degrading enzymes and other proteins from this bacterium. Several members of CBM37 have been shown to exhibit rather broad binding specificity to xylan, chitin, microcrystalline and phosphoric-acid swollen cellulose, as well as more heterogeneous substrates, such as alfalfa cell walls, banana stem and wheat straw.
CBM38	The inulin-binding function has been demonstrated in the case of the cycloinulo-oligosaccharide fructanotransferase from Paenibacillus macerans (Bacillus macerans) by Lee et al. (2004) FEMS Microbiol Lett 234:105-10. (PMID:15109727).
CBM39	Modules generally found at the N-terminus of a GH16 module (itself frequently lacking a catalytic machinery) and more seldomly in isolation. The beta-1,3-glucan binding function has been demonstrated, along with binding to lipopolysaccharide and lipoteichoic acid.
CBM3	Modules of approx. 150 residues found in bacterial enzymes. The cellulose-binding function has been demonstrated in many cases. In one instance binding to chitin has been reported.
CBM40	Modules of approx. 200 residues, found at the N-terminus of GH33 sialidases. Can also be found inserted in the beta-propeller of GH33 sialidases. The sialic acid binding function has been demonstrated for the N-terminal CBM40 of Vibrio cholerae sialidase (Moustafa et al. (2004) J Biol Chem 279:40819-26) (PMID: 15226294).
CBM41	Modules of approx. 100 residues found in primarily in bacterial pullulanases. The N-terminal module from Thermotoga maritima Pul13 has been shown to bind to the alpha-glucans amylose, amylopectin, pullulan, and oligosaccharide fragments derived from these polysaccharides (Lammerts van Bueren et al. (2004) Biochemistry 43:15633-42) (PMID: 15581376).
CBM42	Modules of approx. 160 residues found mostly at the C-terminus of GH54 catalytic domains. Binding to arabinofuranose (present in arabinoxylan) has been demonstrated.
CBM43	Modules of approx. 90-100 residues found at the C-terminus of GH17 or GH72 enzymatic modules and also sometimes isolated. CBM43 modules sometimes carry a C-terminal membrane anchor. The beta-1,3-glucan binding function has been demonstrated with the olive pollen protein Ole e 10.
CBM44	The C-terminal CBM44 module of the Clostridium thermocellum enzyme has been demonstrated to bind equally well cellulose and xyloglucan
CBM45	Modules of approx. 100 residues, found at the N-terminus of plastidial alpha-amylases and of alpha-glucan, water dikinases. Starch-binding activity demonstrated in the case of potato alpha-glucan, water dikinase.
CBM46	Modules of approx. 100 residues, found at the C-terminus of several GH5 cellulases. Cellulose-binding function demonstrated in one case.
CBM47	Modules of approx 150 residues. Fucose-binding activity demonstrated
CBM48	Modules of approx. 100 residues with glycogen-binding function, appended to GH13 modules. Also found in the beta subunit (glycogen-binding) of AMP-activated protein kinases (AMPK)
CBM49	Modules of approx. 100 residues found at the C-terminus of plant GH9 enzymes. Distantly related to CBM2 modules. Binding to crystalline cellulose demonstrated in the case of Solanum lycopersicum Cel8 enzyme (SlCel9C1).
CBM4	Modules of approx. 150 residues found in bacterial enzymes. Binding of these modules has been demonstrated with xylan, beta-1,3-glucan, beta-1,3-1,4-glucan, beta-1,6-glucan and amorphous cellulose but not with crystalline cellulose.
CBM50	Modules of approx. 50 residues found attached to various enzymes from families GH18, GH19, GH23, GH24, GH25 and GH73, i.e. enzymes cleaving either chitin or peptidoglycan. Binding to chitopentaose demonstrated in the case of Pteris ryukyuensis chitinase A [Ohnuma T et al. (2008) J. Biol. Chem. 283:5178-87 (PMID: 18083709)]. CBM50 modules are also found in a multitude of other enzymes targeting th…
CBM51	Modules of approx. 150 residues found attached to various enzymes from families GH2, GH27, GH31, GH95, GH98 and GH101 . Binding to galactose and to blood group A/B-antigens demonstrated in the case of C. perfringens GH95CBM51 and GH98CBM51 respectively [Gregg KJ et al. (2008) J. Biol. Chem. 283:12604-13 PMID: 18292090].
CBM52	Modules of approx. 60 residues attached to a few GH81 enzymes but present in other proteins. Binding to beta-1,3-glucan demonstrated for Schizosaccharomyces pombe 972h- endo-1,3-beta-glucanase Eng1 [Martin-Quadrado et al., Mol. Microbiol. (2008) 69:188-200 PMID:18466295]
CBM53	Starch-binding function demonstrated by Valdez et al. (2008) [PMID: 18260645]
CBM54	Binding to xylan, yeast cell wall glucan and chitin shown in Dvortsov et al., Microbiology UK (2009) in press.
CBM55	Binding to chitin demonstrated in the case of the CBM55 of Entamoeba histolytica chitinase (Van Dellen et al. (2002) Infect Immun. 70:3259-3263; PMID: 12011021).
CBM56	beta-1,3-glucan binding function demonstrated by Yamamoto et al. (1998) FEBS Letters 433:41-43 [PMID: 9738929]
CBM57	Created from reading Schallus et al (2008) Mol Biol Cell. 19:3404-3414 [PMID: 18524852] and finding related domains attached to various glycosidases.
CBM58	The CBM58 module of the Bacteroides thetaiotaomicron SusG protein has been shown to bind maltoheptaose
CBM59	Binding to mannan, xylan, and cellulose demonstrated for the CBM59 of ManF-X10 xylanase from an environmental genomic DNA library (Li et al. (2009) World Journal of Microbiology and Biotechnology 25:2071-2078; doi:10.1007/s11274-009-0111-6)
CBM5	Modules of approx. 60 residues found in bacterial enzymes. Chitin-binding described in several cases. Distantly related to the CBM12 family.
CBM60	Modules of approx 120 residues usually found appended to xylanases. The xylan-binding function and the relatedness (circular permutation) to family CBM36 has been demonstrated [PMID: 20659893].
CBM61	Modules of approx. 150 residues found appended to GH16, GH30, GH31, GH43, GH53 and GH66 catalytic domains. A beta-1,4-galactan binding function has been demonstrated for the CBM61 of Thermotoga maritima GH53 galactanase [PMID: 20826814].
CBM62	The CBM62 module of Clostridium thermocellum Cthe_2193 protein binds galactose moieties found on xyloglucan, arabinogalactan and galactomannan.
CBM63	The CBM63 module of Bacillus subtilis expansin EXLX1 has been shown to bind cellulose.
CBM64	Module found at C-term of several Spirochaeta thermophila proteins. Binding to cellulose shown by Angelov, Loderer, Pompei Liebl (2011) AEM, 77:5483-5489 [PMID - 21685171]
CBM65	CBM65A and CBM65B, derived from Eubacterium cellulosolvens endoglucanase EcCel5A, bind to a range of beta-glucans but, uniquely, display significant preference for xyloglucan
CBM66	The CBM66 module, derived from the Bacillus subtilis exo-acting beta-fructosidase SacC, targets the terminal fructoside residue of fructans.
CBM67	Fujimoto et al. [PMID : 23486481] disclosed the L-rhamnose binding activity and 3-D structure of the CBM67 of Streptomyces avermitilis alpha-L-rhamnosidase (SaRha78A);
CBM68	Binding to maltotriose and maltotetraose shown for the pullulanase of Anoxybacillus sp. LM18-11. Binding function derived from crystal structure and deletion of the CBM, which showed reduced specific activity and increased Km value compared to the wild type enzyme.
CBM69	starch-binding function demonstrated in one case; distantly related to families CBM20 and CBM48
CBM6	Modules of approx. 120 residues. The cellulose-binding function has been demonstrated in one case on amorphous cellulose and beta-1,4-xylan. Some of these modules also bind beta-1,3-glucan, beta-1,3-1,4-glucan, and beta-1,4-glucan.
CBM70	The hyaluronan-specific binding function of the N-terminal CBM70 module of Streptococcus pneumoniae hyaluronate lyase has been demonstrated.
CBM71	The two CBM71s of S. pneumoniae BgaA bind lactose and LacNAc.
CBM72	Modules of 130-180 residues found at the C-terminus glycoside hydrolases from various families, sometimes as tandem repeats. The CBM72 found on an endoglucanase from an uncultivated microorganism was found to bind a broad spectrum of polysaccharides including soluble and insoluble cellulose, beta-1,3/1,4-mixed linked glucans, xylan, and beta-mannan [PMID=26765840].
CBM73	Modules of approx 65 residues found on various enzymes active of chitin. Chitin-binding function demonstrated for the Cellvibrio japonicus CjLPMO10A protein.
CBM74	Modules of approx. 300 residues appended to several alpha-amylases. The starch-binding function has been demonstrated for the CBM74 appended to the GH13 alpha-amylase of Microbacterium aureum B8.A
CBM75	Modules of 290 residues appended to GH43_16 enzymes. So far found exclusively in Ruminococci. The xyloglucan-binding function was demonstrated for the R. flavefaciens protein.
CBM76	Modules of approx. 170 residues appended to GH44 enzymes. So far found exclusively in Ruminococci. Broad specificity binding to beta-glucans demontsrated for the R. flavefaciens module, which binds xyloglucan, glucomannan, and barley beta-glucan.
CBM77	Pectin binding modules of approx. 110 residues. The Ruminococcus flavefaciens CBM77 was shown to bind various pectins of low degree of esterification.
CBM78	Modules of approx. 150 residues appended to the C-terminus of GH5 and GH26 enzymes. So far found exclusively in Ruminococcal enzymes. The R. flavefaciens module has been shown to bind decorated beta-1,4-glucans with a preference for xyloglucan.
CBM79	Modules of approx. 130 residues found so far only in ruminococcal proteins. Binding to various beta-glucans was shown for the R. flavefaciens GH9 enzyme.
CBM7	Deleted entry
CBM80	Modules of approx. 90 residues found so far only in ruminococcal enzymes of families GH5 or GH26. Broad specificity for beta-glycans (xyloglucan, glucomannan, galactomannan, barley beta-glucan).
CBM81	Small family of modules of approx. 100 residues, appended to GH5_2 enzymes. So far found exclusively in a few gammaproteobacteria. The CBM81 from an uncultivated species was shown to have binding affinity for beta-1,4-, beta-1,3,-glucans, xyloglucan, avicel and cellooligosaccharides.
CBM82	The boundaries, structure and starch-binding function of the CBM82 module of Eubacterium rectale Amy13K have been reported by Cockburn and coworkers in Molec. Microbiol. (2017) (PMID=29139580)
CBM83	The boundaries, structure and starch-binding function of the CBM83 module of Eubacterium rectale Amy13K have been reported by Cockburn and coworkers in Molec. Microbiol. (2017) (PMID=29139580)
CBM84	Modules of approx. 140 aminoacids appended to enzymes of different families of CAZymes. A xanthan-binding function was reported for the GH9 xanthanase of Paenibacillus nanensis by Moroz et al. ACS Catal., 2018, 8 (7), pp 6021-6034.
CBM85
CBM86
CBM87	Binding to alpha-1,4-N-acetylgalactosamine-rich regions of galactosaminogalactan
CBM8	The cellulose-binding module from a cellulase of the slime mold Dictyostelium discoideum has been experimentally shown to bind cellulose.
CBM9	Modules of approx. 170 residues found so far only in xylanases. The cellulose-binding function has been demonstrated in one case.
CE0	See below.
CE10	arylesterase (EC 3.1.1.-); carboxyl esterase (EC 3.1.1.3); acetylcholinesterase (EC 3.1.1.7); cholinesterase (EC 3.1.1.8); sterol esterase (EC 3.1.1.13); brefeldin A esterase (EC 3.1.1.-).
CE11	UDP-3-0-acyl N-acetylglucosamine deacetylase (EC 3.5.1.108).
CE12	pectin acetylesterase (EC 3.1.1.-); rhamnogalacturonan acetylesterase (EC 3.1.1.-); acetyl xylan esterase (EC 3.1.1.72)
CE13	pectin acetylesterase (EC 3.1.1.-)
CE14	N-acetyl-1-D-myo-inosityl-2-amino-2-deoxy-alpha-D-glucopyranoside deacetylase (EC 3.5.1.89); diacetylchitobiose deacetylase (EC 3.5.1.-); mycothiol S-conjugate amidase (EC 3.5.1.-)
CE15	4-O-methyl-glucuronoyl methylesterase (EC 3.1.1.-)
CE16	acetylesterase (EC 3.1.1.6) active on various carbohydrate acetyl esters
CE17	acetylmannan esterase (3.1.1.-)
CE18	N-acetylgalactosamine deacetylase (EC 3.5.1.-)
CE1	acetyl xylan esterase (EC 3.1.1.72); cinnamoyl esterase (EC 3.1.1.-); feruloyl esterase (EC 3.1.1.73); carboxylesterase (EC 3.1.1.1); S-formylglutathione hydrolase (EC 3.1.2.12); diacylglycerol O-acyltransferase (EC 2.3.1.20); trehalose 6-O-mycolyltransferase (EC 2.3.1.122)
CE2	acetyl xylan esterase (EC 3.1.1.72).
CE3	acetyl xylan esterase (EC 3.1.1.72).
CE4	acetyl xylan esterase (EC 3.1.1.72); chitin deacetylase (EC 3.5.1.41); chitooligosaccharide deacetylase (EC 3.5.1.-); peptidoglycan GlcNAc deacetylase (EC 3.5.1.-); peptidoglycan N-acetylmuramic acid deacetylase (EC 3.5.1.-).
CE5	acetyl xylan esterase (EC 3.1.1.72); cutinase (EC 3.1.1.74)
CE6	acetyl xylan esterase (EC 3.1.1.72).
CE7	acetyl xylan esterase (EC 3.1.1.72); cephalosporin-C deacetylase (EC 3.1.1.41).
CE8	pectin methylesterase (EC 3.1.1.11).
CE9	N-acetylglucosamine 6-phosphate deacetylase (EC 3.5.1.25); N-acetylglucosamine 6-phosphate deacetylase (EC 3.5.1.80)
GH0	Glycoside hydrolases not yet assigned to a family.
GH100	alkaline and neutral invertase (EC 3.2.1.26)
GH101	endo-alpha-N-acetylgalactosaminidase (EC 3.2.1.97)
GH102	peptidoglycan lytic transglycosylase (EC 3.2.1.-)
GH103	peptidoglycan lytic transglycosylase (EC 3.2.1.-)
GH104	peptidoglycan lytic transglycosylase (EC 3.2.1.-)
GH105	unsaturated rhamnogalacturonyl hydrolase (EC 3.2.1.172); d-4,5-unsaturated beta-glucuronyl hydrolase (EC 3.2.1.-); d-4,5-unsaturated alpha-galacturonidase (EC 3.2.1.-)
GH106	alpha-L-rhamnosidase (EC 3.2.1.40); rhamnogalacturonan alpha-L-rhamnohydrolase (EC 3.2.1.174)
GH107	endo-alpha-1,4-L-fucanase (EC 3.2.1.212)
GH108	N-acetylmuramidase (EC 3.2.1.17)
GH109	alpha-N-acetylgalactosaminidase (EC 3.2.1.49)
GH10	endo-1,4-beta-xylanase (EC 3.2.1.8); endo-1,3-beta-xylanase (EC 3.2.1.32); tomatinase (EC 3.2.1.-); xylan endotransglycosylase (EC 2.4.2.-); endo-beta-1,4-glucanase (EC 3.2.1.4)
GH110	alpha-galactosidase (EC 3.2.1.22); alpha-1,3-galactosidase (EC 3.2.1.-)
GH111	keratan sulfate hydrolase (endo-beta-N-acetylglucosaminidase) (EC 3.2.1.-)
GH112	lacto-N-biose phosphorylase or galacto-N-biose phosphorylase (EC 2.4.1.211); D-galactosyl-beta-1,4-L-rhamnose phosphorylase (EC 2.4.1.247)
GH113	beta-mannanase (EC 3.2.1.78)
GH114	endo-alpha-1,4-polygalactosaminidase (EC 3.2.1.109)
GH115	xylan alpha-1,2-glucuronidase (3.2.1.131); alpha-(4-O-methyl)-glucuronidase (3.2.1.-)
GH116	beta-glucosidase (EC 3.2.1.21); beta-xylosidase (EC 3.2.1.37); acid beta-glucosidase/beta-glucosylceramidase (EC 3.2.1.45); beta-N-acetylglucosaminidase (EC 3.2.1.52)
GH117	beta-D-galactofuranosidase (EC 3.2.1.146); alpha-neoagaro-oligosaccharide hydrolase (EC 3.2.1.159)
GH118	beta-agarase (EC 3.2.1.81)
GH119	alpha-amylase (EC 3.2.1.1)
GH11	endo-beta-1,4-xylanase (EC 3.2.1.8); endo-beta-1,3-xylanase (EC 3.2.1.32)
GH120	beta-xylosidase (EC 3.2.1.37)
GH121	beta-L-arabinobiosidase (EC 3.2.1.-)
GH122	alpha-glucosidase (EC 3.2.1.20)
GH123	beta-N-acetylgalactosaminidase (EC 3.2.1.53); glycosphingolipid beta-N-acetylgalactosaminidase (EC 3.2.1.-)
GH124	endoglucanase (EC 3.2.1.4)
GH125	exo-alpha-1,6-mannosidase (EC 3.2.1.-)
GH126	alpha-amylase (EC 3.2.1.-)
GH127	beta-L-arabinofuranosidase (EC 3.2.1.185); 3-C-carboxy-5-deoxy-L-xylose (aceric acid) hydrolase (EC 3.2.1.-); alpha-1,3-(3,6)-anhydro-D-galactosidase (EC 3.2.1.-)
GH128	beta-1,3-glucanase (EC 3.2.1.39); beta-1,3-glucosidase (EC 3.2.1.-)
GH129	alpha-N-acetylgalactosaminidase (EC 3.2.1.49); ; alpha-1,3-(3,6)-anhydro-D-galactosidase (EC 3.2.1.-)
GH12	endoglucanase (EC 3.2.1.4); xyloglucan hydrolase (EC 3.2.1.151); beta-1,3-1,4-glucanase (EC 3.2.1.73); xyloglucan endotransglycosylase (EC 2.4.1.207)
GH130	beta-1,4-mannosylglucose phosphorylase (EC 2.4.1.281); beta-1,4-mannooligosaccharide phosphorylase (EC 2.4.1.319); beta-1,4-mannosyl-N-acetyl-glucosamine phosphorylase (EC 2.4.1.320); beta-1,2-mannobiose phosphorylase (EC 2.4.1.-); beta-1,2-oligomannan phosphorylase (EC 2.4.1.-); beta-1,2-mannosidase (EC 3.2.1.-)
GH131	broad specificity exo-beta-1,3/1,6-glucanase with endo-beta-1,4-glucanase activity (EC 3.2.1.-);
GH132	Activity on beta-1,3-glucan (curdlan) shown for the Aspergillus fumigatus Sun4 protein; activity on laminarioligosaccharides shown for Aspergillus fumigatus Sun4 protein and Candida albicans Sun41 protein; transglycosylation activity reported in PMID 23508952.
GH133	amylo-alpha-1,6-glucosidase (EC 3.2.1.33);
GH134	endo-beta-1,4-mannanase (EC 3.2.1.78);
GH135	alpha-1,4-galactosaminogalactan hydrolase (EC 3.2.1.-)
GH136	lacto-N-biosidase (EC 3.2.1.140); Lacto-N-biosidase (Lewis antigen a/b specificity) (EC 3.2.1.-)
GH137	beta-L-arabinofuranosidase (EC 3.2.1.185)
GH138	rhamnogalacturonan alpha-1,2-galacturonohydrolase (EC 3.2.1.173)
GH139	alpha-2-O-Me-L-fucosidase (EC 3.2.1.-)
GH13	alpha-amylase (EC 3.2.1.1); pullulanase (EC 3.2.1.41); cyclomaltodextrin glucanotransferase (EC 2.4.1.19); cyclomaltodextrinase (EC 3.2.1.54); trehalose-6-phosphate hydrolase (EC 3.2.1.93); oligo-alpha-glucosidase (EC 3.2.1.10); maltogenic amylase (EC 3.2.1.133); neopullulanase (EC 3.2.1.135); alpha-glucosidase (EC 3.2.1.20); maltotetraose-forming alpha-amylase (EC 3.2.1.60); isoamylase (EC 3.2.1…
GH140	beta-1,2-apiosidase (EC 3.2.1.-)
GH141	alpha-L-fucosidase (EC 3.2.1.51); xylanase (EC 3.2.1.8)
GH142	beta-L-arabinofuranosidase (EC 3.2.1.185)
GH143	2-keto-3-deoxy-D-lyxo-heptulosaric acid hydrolase (EC 3.2.1.-)
GH144	endo-beta-1,2-glucanase (EC 3.2.1.71); beta-1,2-glucooligosaccharide sophorohydrolase (EC 3.2.1.-)
GH145	L-Rhalpha-alpha-1,4-GlcA alpha-L-rhamnohydrolase (EC 3.2.1.-)
GH146	beta-L-arabinofuranosidase (EC 3.2.1.185)
GH147	beta-galactosidase (EC 3.2.1.23)
GH148	beta-1,3-glucanase (EC 3.2.1.-)
GH149	beta-1,3-glucan phosphorylase (EC 2.4.1.97)
GH14	beta-amylase (EC 3.2.1.2)
GH150	l-carrageenase (EC 3.2.1.-)
GH151	alpha-L-fucosidase (EC 3.2.1.51)
GH152	beta-1,3-glucanase (EC 3.2.1.39)
GH153	poly-beta-1,6-D-glucosamine hydrolase (EC 3.2.1.-)
GH154	beta-glucuronidase (3.2.1.31)
GH155	Deleted family!
GH156	exo-alpha-sialidase (EC 3.2.1.18);
GH157	endo-beta-1,3-glucanase (EC 3.2.1.39); endo-beta-1,3-glucanase / laminarinase (EC 3.2.1.39)
GH158	endo-beta-1,3-glucanase (EC 3.2.1.39)
GH159	beta-D-galactofuranosidase (EC 3.2.1.146)
GH15	glucoamylase (EC 3.2.1.3); glucodextranase (EC 3.2.1.70); alpha,alpha-trehalase (EC 3.2.1.28); dextran dextrinase (EC 2.4.1.2)
GH160	endo-beta-1,4-galactosidase (EC 3.2.1.-)
GH161	beta-1,3-glucan phosphorylase (EC 2.4.1.-)
GH162	endo-beta-1,2-glucanase (EC 3.2.1.71)
GH163	endo-beta-N-acetylglucosaminidase cleaving GlcNAc-beta-1,2-Man (EC 3.2.1.-)
GH164	beta-mannosidase (EC 3.2.1.25)
GH165	beta-galactosidase (EC 3.2.1.23)
GH166	alpha-1,4-galactosaminogalactan hydrolase (EC 3.2.1.-)
GH167	beta-carrageenase (EC 3.2.1.-)
GH168	endo-alpha-(1,3)-L-fucanase (EC 3.2.1.211)
GH16	xyloglucan:xyloglucosyltransferase (EC 2.4.1.207); keratan-sulfate endo-1,4-beta-galactosidase (EC 3.2.1.103); endo-1,3-beta-glucanase / laminarinase (EC 3.2.1.39); endo-1,3(4)-beta-glucanase (EC 3.2.1.6); licheninase (EC 3.2.1.73); beta-agarase (EC 3.2.1.81); kappa;-carrageenase (EC 3.2.1.83); xyloglucanase (EC 3.2.1.151); endo-beta-1,3-galactanase (EC 3.2.1.181); [retaining] beta-porphyranase (…
GH17	glucan endo-1,3-beta-glucosidase (EC 3.2.1.39); licheninase (EC 3.2.1.73); ABA-specific beta-glucosidase (EC 3.2.1.175); beta-1,3-glucanosyltransglycosylase (EC 2.4.1.-); beta-1,3-glucosidase (EC 3.2.1.-)
GH18	chitinase (EC 3.2.1.14); lysozyme (EC 3.2.1.17); endo-beta-N-acetylglucosaminidase (EC 3.2.1.96); peptidoglycan hydrolase with endo-beta-N-acetylglucosaminidase specificity (EC 3.2.1.-); Nod factor hydrolase (EC 3.2.1.-); xylanase inhibitor; concanavalin B; narbonin
GH19	chitinase (EC 3.2.1.14); lysozyme (EC 3.2.1.17)
GH1	beta-glucosidase (EC 3.2.1.21); beta-galactosidase (EC 3.2.1.23); beta-mannosidase (EC 3.2.1.25); beta-glucuronidase (EC 3.2.1.31); beta-xylosidase (EC 3.2.1.37); beta-D-fucosidase (EC 3.2.1.38); phlorizin hydrolase (EC 3.2.1.62); exo-beta-1,4-glucanase (EC 3.2.1.74); 6-phospho-beta-galactosidase (EC 3.2.1.85); 6-phospho-beta-glucosidase (EC 3.2.1.86); strictosidine beta-glucosidase (EC 3.2.1.105…
GH20	beta-hexosaminidase (EC 3.2.1.52); lacto-N-biosidase (EC 3.2.1.140); beta-1,6-N-acetylglucosaminidase (EC 3.2.1.-); beta-6-SO3-N-acetylglucosaminidase (EC 3.2.1.-)
GH21	Deleted family!
GH22	lysozyme type C (EC 3.2.1.17); lysozyme type i (EC 3.2.1.17); alpha-lactalbumin
GH23	lysozyme type G (EC 3.2.1.17); peptidoglycan lyase (EC 4.2.2.n1) also known in the literature as peptidoglycan lytic transglycosylase; chitinase (EC 3.2.1.14)
GH24	lysozyme (EC 3.2.1.17)
GH25	lysozyme (EC 3.2.1.17)
GH26	beta-mannanase (EC 3.2.1.78); exo-beta-1,4-mannobiohydrolase (EC 3.2.1.100); beta-1,3-xylanase (EC 3.2.1.32); lichenase / endo-beta-1,3-1,4-glucanase (EC 3.2.1.73); mannobiose-producing exo-beta-mannanase (EC 3.2.1.-)
GH27	alpha-galactosidase (EC 3.2.1.22); alpha-N-acetylgalactosaminidase (EC 3.2.1.49); isomalto-dextranase (EC 3.2.1.94); beta-L-arabinopyranosidase (EC 3.2.1.88); galactan:galactan galactosyltransferase (EC 2.4.1.-)
GH28	polygalacturonase (EC 3.2.1.15); exo-polygalacturonase (EC 3.2.1.67); exo-polygalacturonosidase (EC 3.2.1.82); rhamnogalacturonase (EC 3.2.1.171); rhamnogalacturonan alpha-1,2-galacturonohydrolase (EC 3.2.1.173); xylogalacturonan hydrolase (EC 3.2.1.-)
GH29	alpha-L-fucosidase (EC 3.2.1.51); alpha-1,3/1,4-L-fucosidase (EC 3.2.1.111)
GH2	beta-galactosidase (EC 3.2.1.23) ; beta-mannosidase (EC 3.2.1.25); beta-glucuronidase (EC 3.2.1.31); alpha-L-arabinofuranosidase (EC 3.2.1.55); mannosylglycoprotein endo-beta-mannosidase (EC 3.2.1.152); exo-beta-glucosaminidase (EC 3.2.1.165); alpha-L-arabinopyranosidase (EC 3.2.1.-); beta-galacturonidase (EC 3.2.1.-); beta-xylosidase (EC 3.2.1.37); beta-D-galactofuranosidase (EC 3.2.1.146);
GH30	endo-beta-1,4-xylanase (EC 3.2.1.8); beta-glucosidase (3.2.1.21); beta-glucuronidase (EC 3.2.1.31); beta-xylosidase (EC 3.2.1.37); beta-fucosidase (EC 3.2.1.38); glucosylceramidase (EC 3.2.1.45); beta-1,6-glucanase (EC 3.2.1.75); glucuronoarabinoxylan endo-beta-1,4-xylanase (EC 3.2.1.136); endo-beta-1,6-galactanase (EC:3.2.1.164); [reducing end] beta-xylosidase (EC 3.2.1.-)
GH31	alpha-glucosidase (EC 3.2.1.20); alpha-galactosidase (EC 3.2.1.22); alpha-mannosidase (EC 3.2.1.24); alpha-1,3-glucosidase (EC 3.2.1.84); sucrase-isomaltase (EC 3.2.1.48) (EC 3.2.1.10); alpha-xylosidase (EC 3.2.1.177); alpha-glucan lyase (EC 4.2.2.13); isomaltosyltransferase (EC 2.4.1.-); oligosaccharide alpha-1,4-glucosyltransferase (EC 2.4.1.161); sulfoquinovosidase (EC 3.2.1.-); alpha-N-acetyl…
GH32	invertase (EC 3.2.1.26); endo-inulinase (EC 3.2.1.7); beta-2,6-fructan 6-levanbiohydrolase (EC 3.2.1.64); endo-levanase (EC 3.2.1.65); exo-inulinase (EC 3.2.1.80); fructan beta-(2,1)-fructosidase/1-exohydrolase (EC 3.2.1.153); fructan beta-(2,6)-fructosidase/6-exohydrolase (EC 3.2.1.154); sucrose:sucrose 1-fructosyltransferase (EC 2.4.1.99); fructan:fructan 1-fructosyltransferase (EC 2.4.1.100); …
GH33	sialidase or neuraminidase (EC 3.2.1.18); trans-sialidase (EC 2.4.1.-); anhydrosialidase (EC 4.2.2.15); Kdo hydrolase (EC 3.2.1.-); 2-keto-3-deoxynononic acid hydrolase / KDNase (EC 3.2.1.-)
GH34	sialidase or neuraminidase (EC 3.2.1.18)
GH35	beta-galactosidase (EC 3.2.1.23); exo-beta-glucosaminidase (EC 3.2.1.165); exo-beta-1,4-galactanase (EC 3.2.1.-); beta-1,3-galactosidase (EC 3.2.1.-)
GH36	alpha-galactosidase (EC 3.2.1.22); alpha-N-acetylgalactosaminidase (EC 3.2.1.49); stachyose synthase (EC 2.4.1.67); raffinose synthase (EC 2.4.1.82)
GH37	alpha,alpha-trehalase (EC 3.2.1.28).
GH38	alpha-mannosidase (EC 3.2.1.24); mannosyl-oligosaccharide alpha-1,2-mannosidase (EC 3.2.1.113); mannosyl-oligosaccharide alpha-1,3-1,6-mannosidase (EC 3.2.1.114); alpha-2-O-mannosylglycerate hydrolase (EC 3.2.1.170); mannosyl-oligosaccharide alpha-1,3-mannosidase (EC 3.2.1.-)
GH39	alpha-L-iduronidase (EC 3.2.1.76); beta-xylosidase (EC 3.2.1.37); alpha-L-arabinofuranosidase (EC 3.2.1.55); beta-glucosidase (EC 3.2.1.21); beta-galactosidase (EC 3.2.1.23)
GH3	beta-glucosidase (EC 3.2.1.21); xylan 1,4-beta-xylosidase (EC 3.2.1.37); beta-glucosylceramidase (EC 3.2.1.45); beta-N-acetylhexosaminidase (EC 3.2.1.52); alpha-L-arabinofuranosidase (EC 3.2.1.55); glucan 1,4-beta-glucosidase (EC 3.2.1.74); isoprimeverose-producing oligoxyloglucan hydrolase (EC 3.2.1.120); coniferin beta-glucosidase (EC 3.2.1.126); exo-1,3-1,4-glucanase (EC 3.2.1.-); beta-N-acety…
GH40	Deleted family!
GH41	Deleted family!
GH42	beta-galactosidase (EC 3.2.1.23); alpha-L-arabinopyranosidase (EC 3.2.1.-)
GH43	beta-xylosidase (EC 3.2.1.37); alpha-L-arabinofuranosidase (EC 3.2.1.55); xylanase (EC 3.2.1.8); alpha-1,2-L-arabinofuranosidase (EC 3.2.1.-); exo-alpha-1,5-L-arabinofuranosidase (EC 3.2.1.-); [inverting] exo-alpha-1,5-L-arabinanase (EC 3.2.1.-); beta-1,3-xylosidase (EC 3.2.1.-); [inverting] exo-alpha-1,5-L-arabinanase (EC 3.2.1.-); [inverting] endo-alpha-1,5-L-arabinanase (EC 3.2.1.99); exo-beta…
GH44	endoglucanase (EC 3.2.1.4); xyloglucanase (EC 3.2.1.151)
GH45	endoglucanase (EC 3.2.1.4); xyloglucan-specific endo-beta-1,4-glucanase / endo-xyloglucanase (EC 3.2.1.151); endo-beta-1,4-mannanase (EC 3.2.1.78)
GH46	chitosanase (EC 3.2.1.132)
GH47	alpha-mannosidase (EC 3.2.1.113)
GH48	reducing end-acting cellobiohydrolase (EC 3.2.1.176); endo-beta-1,4-glucanase (EC 3.2.1.4); chitinase (EC 3.2.1.14)
GH49	dextranase (EC 3.2.1.11); isopullulanase (EC 3.2.1.57); dextran 1,6-alpha-isomaltotriosidase (EC 3.2.1.95); sulfated arabinan endo-1,4-beta-L-arabinanase (EC 3.2.1.-)
GH4	maltose-6-phosphate glucosidase (EC 3.2.1.122); alpha-glucosidase (EC 3.2.1.20); alpha-galactosidase (EC 3.2.1.22); 6-phospho-beta-glucosidase (EC 3.2.1.86); alpha-glucuronidase (EC 3.2.1.139); alpha-galacturonase (EC 3.2.1.67); palatinase (EC 3.2.1.-)
GH50	beta-agarase (EC 3.2.1.81).
GH51	endoglucanase (EC 3.2.1.4); endo-beta-1,4-xylanase (EC 3.2.1.8); beta-xylosidase (EC 3.2.1.37); alpha-L-arabinofuranosidase (EC 3.2.1.55); lichenase / endo-beta-1,3-1,4-glucanase (EC 3.2.1.73)
GH52	beta-xylosidase (EC 3.2.1.37).
GH53	endo-beta-1,4-galactanase (EC 3.2.1.89).
GH54	alpha-L-arabinofuranosidase (EC 3.2.1.55); beta-xylosidase (EC 3.2.1.37).
GH55	exo-beta-1,3-glucanase (EC 3.2.1.58); endo-beta-1,3-glucanase (EC 3.2.1.39)
GH56	hyaluronidase (EC 3.2.1.35); chondroitin hydrolase (EC 3.2.1.-)
GH57	alpha-amylase (EC 3.2.1.1); alpha-galactosidase (EC 3.2.1.22); amylopullulanase (EC 3.2.1.41); cyclomaltodextrinase (EC 3.2.1.54); branching enzyme (EC 2.4.1.18); 4-alpha-glucanotransferase (EC 2.4.1.25)
GH58	endo-N-acetylneuraminidase or endo-sialidase (EC 3.2.1.129)
GH59	beta-galactosidase (EC 3.2.1.23); galactocerebrosidase (EC 3.2.1.46)
GH5	endo-beta-1,4-glucanase / cellulase (EC 3.2.1.4); endo-beta-1,4-xylanase (EC 3.2.1.8); beta-glucosidase (EC 3.2.1.21); beta-mannosidase (EC 3.2.1.25); beta-glucosylceramidase (EC 3.2.1.45); glucan beta-1,3-glucosidase (EC 3.2.1.58); exo-beta-1,4-glucanase / cellodextrinase (EC 3.2.1.74); glucan endo-1,6-beta-glucosidase (EC 3.2.1.75); mannan endo-beta-1,4-mannosidase (EC 3.2.1.78); cellulose beta…
GH60	Deleted family!
GH61	Copper-dependent lytic polysaccharide monooxygenases now reclassified in family AA9
GH62	alpha-L-arabinofuranosidase (EC 3.2.1.55)
GH63	processing alpha-glucosidase (EC 3.2.1.106); alpha-1,3-glucosidase (EC 3.2.1.84); alpha-glucosidase (EC 3.2.1.20); mannosylglycerate alpha-mannosidase / mannosylglycerate hydrolase (EC 3.2.1.170); glucosylglycerate hydrolase (EC 3.2.1.208)
GH64	beta-1,3-glucanase (EC 3.2.1.39)
GH65	alpha,alpha-trehalase (EC 3.2.1.28); maltose phosphorylase (EC 2.4.1.8); trehalose phosphorylase (EC 2.4.1.64); kojibiose phosphorylase (EC 2.4.1.230); trehalose-6-phosphate phosphorylase (EC 2.4.1.216); nigerose phosphorylase (EC 2.4.1.279); 3-O-alpha-glucopyranosyl-L-rhamnose phosphorylase (EC 2.4.1.282); 2-O-alpha-glucopyranosylglycerol: phosphate beta-glucosyltransferase (EC 2.4.1.-); alpha-g…
GH66	cycloisomaltooligosaccharide glucanotransferase (EC 2.4.1.248); dextranase (EC 3.2.1.11).
GH67	alpha-glucuronidase (EC 3.2.1.139); xylan alpha-1,2-glucuronidase (EC 3.2.1.131)
GH68	levansucrase (EC 2.4.1.10); beta-fructofuranosidase (EC 3.2.1.26); inulosucrase (EC 2.4.1.9).
GH69	Deleted: now family PL16
GH6	endoglucanase (EC 3.2.1.4); cellobiohydrolase (EC 3.2.1.91); lichenase / endo-beta-1,3-1,4-glucanase (EC 3.2.1.73); lichenase / endo-beta-1,3-1,4-glucanase (EC 3.2.1.73);
GH70	dextransucrase (EC 2.4.1.5); alternansucrase (EC 2.4.1.140); reuteransucrase (EC 2.4.1.-); alpha-4,6-glucanotransferase (EC 2.4.1.-); alpha-1,2-branched dextransucrase (EC 2.4.1.-); alpha-4,3-glucanotransferase (EC 2.4.1.-)
GH71	alpha-1,3-glucanase (EC 3.2.1.59).
GH72	beta-1,3-glucanosyltransglycosylase (EC 2.4.1.-)
GH73	lysozyme (EC 3.2.1.17); mannosyl-glycoprotein endo-beta-N-acetylglucosaminidase (EC 3.2.1.96); peptidoglycan hydrolase with endo-beta-N-acetylglucosaminidase specificity (EC 3.2.1.-)
GH74	endoglucanase (EC 3.2.1.4); oligoxyloglucan reducing end-specific cellobiohydrolase (EC 3.2.1.150); xyloglucanase (EC 3.2.1.151)
GH75	chitosanase (EC 3.2.1.132)
GH76	alpha-1,6-mannanase (EC 3.2.1.101); alpha-glucosidase (EC 3.2.1.20)
GH77	amylomaltase or 4-alpha-glucanotransferase (EC 2.4.1.25)
GH78	alpha-L-rhamnosidase (EC 3.2.1.40); rhamnogalacturonan alpha-L-rhamnohydrolase (EC 3.2.1.174); L-Rhap-alpha-1,3-D-Apif -specific alpha-1,3-L-rhamnosidase (EC 3.2.1.-)
GH79	beta-glucuronidase (EC 3.2.1.31); hyaluronoglucuronidase (EC 3.2.1.36); heparanase (EC 3.2.1.166); baicalin beta-glucuronidase (EC 3.2.1.167); beta-4-O-methyl-glucuronidase (EC 3.2.1.-)
GH7	endo-beta-1,4-glucanase (EC 3.2.1.4); reducing end-acting cellobiohydrolase (EC 3.2.1.176); chitosanase (EC 3.2.1.132); endo-beta-1,3-1,4-glucanase (EC 3.2.1.73)
GH80	chitosanase (EC 3.2.1.132)
GH81	endo-beta-1,3-glucanase (EC 3.2.1.39)
GH82	Iota;-carrageenase (EC 3.2.1.157)
GH83	neuraminidase (EC 3.2.1.18)
GH84	N-acetyl beta-glucosaminidase (EC 3.2.1.52); hyaluronidase (EC 3.2.1.35); [protein]-3-O-(GlcNAc)-L-Ser/Thr beta-N-acetylglucosaminidase (EC 3.2.1.169)
GH85	endo-beta-N-acetylglucosaminidase (EC 3.2.1.96)
GH86	beta-agarase (EC 3.2.1.81); beta-porphyranase (EC 3.2.1.178)
GH87	mycodextranase (EC 3.2.1.61); alpha-1,3-glucanase (EC 3.2.1.59)
GH88	d-4,5-unsaturated beta-glucuronyl hydrolase (EC 3.2.1.-)
GH89	alpha-N-acetylglucosaminidase (EC 3.2.1.50)
GH8	chitosanase (EC 3.2.1.132); cellulase (EC 3.2.1.4); licheninase (EC 3.2.1.73); endo-1,4-beta-xylanase (EC 3.2.1.8); reducing-end-xylose releasing exo-oligoxylanase (EC 3.2.1.156)
GH90	endorhamnosidase (EC 3.2.1.-)
GH91	inulin lyase [DFA-I-forming] (EC 4.2.2.17); inulin lyase [DFA-III-forming] (EC 4.2.2.18); difructofuranose 1,2':2,3' dianhydride hydrolase [DFA-IIIase] (EC 3.2.1.-)
GH92	mannosyl-oligosaccharide alpha-1,2-mannosidase (EC 3.2.1.113); mannosyl-oligosaccharide alpha-1,3-mannosidase (EC 3.2.1.-); mannosyl-oligosaccharide alpha-1,6-mannosidase (EC 3.2.1.-); alpha-mannosidase (EC 3.2.1.24); alpha-1,2-mannosidase (EC 3.2.1.-); alpha-1,3-mannosidase (EC 3.2.1.-); alpha-1,4-mannosidase (EC 3.2.1.-); mannosyl-1-phosphodiester alpha-1,P-mannosidase (EC 3.2.1.-)
GH93	exo-alpha-L-1,5-arabinanase (EC 3.2.1.-)
GH94	cellobiose phosphorylase (EC 2.4.1.20); laminaribiose phosphorylase (EC 2.4.1.31); cellodextrin phosphorylase (EC 2.4.1.49); chitobiose phosphorylase (EC 2.4.1.-); cyclic beta-1,2-glucan synthase (EC 2.4.1.-); cellobionic acid phosphorylase (EC 2.4.1.321); beta-1,2-oligoglucan phosphorylase (EC 2.4.1.-)
GH95	alpha-L-fucosidase (EC 3.2.1.51); alpha-1,2-L-fucosidase (EC 3.2.1.63); alpha-L-galactosidase (EC 3.2.1.-)
GH96	alpha-agarase (EC 3.2.1.158)
GH97	glucoamylase (EC 3.2.1.3); alpha-glucosidase (EC 3.2.1.20); alpha-galactosidase (EC 3.2.1.22)
GH98	blood-group endo-beta-1,4-galactosidase (EC 3.2.1.102); blood group A- and B-cleaving endo-beta-1,4-galactosidase (EC 3.2.1.-); endo-beta-1,4-xylanase (EC 3.2.1.8); endo-beta-1,4-xylanase (EC 3.2.1.8)
GH99	glycoprotein endo-alpha-1,2-mannosidase (EC 3.2.1.130); mannan endo-1,2-alpha-mannanase (3.2.1.-)
GH9	endoglucanase (EC 3.2.1.4); endo-beta-1,3(4)-glucanase / lichenase-laminarinase (EC 3.2.1.6); beta-glucosidase (EC 3.2.1.21); lichenase / endo-beta-1,3-1,4-glucanase (EC 3.2.1.73); exo-beta-1,4-glucanase / cellodextrinase (EC 3.2.1.74); cellobiohydrolase (EC 3.2.1.91); xyloglucan-specific endo-beta-1,4-glucanase / endo-xyloglucanase (EC 3.2.1.151); exo-beta-glucosaminidase (EC 3.2.1.165); endo-be…
GT0	Glycosyltransferases not yet assigned to a family
GT100	alpha-sialyltransferase (EC 2.4.99.-)
GT101	beta-glucosyltransferase (EC 2.4.1.-)
GT102	dTDP-beta-L-Rhap : O-antigen-polysaccharide alpha-1,3-L-rhamnosyltransferase (EC 2.4.1.289)
GT103	UDP-GlcpNAc: O-antigen-polysaccharide beta-1,4-N-acetylglucosaminyltransferase (EC 2.4.1.56)
GT104	dTDP-beta-L-Rhap : arginine alpha-L-rhamnosyltransferase (EC 2.4.1.-)
GT105	Dol-P-Man: protein alpha-mannosyltransferase (EC 2.4.1.109);
GT106	UDP-beta-L-rhamnose:rhamnogalacturonan I 4-alpha-rhamnosyltransferase (EC 2.4.1.351)
GT107	CMP-beta-KDO: beta-2,4-KDO transferase (EC 2.4.99.-); CMP-beta-KDO: beta-2,7-KDO transferase (EC 2.4.99.-)
GT108	beta-1,2-mannosyltransferase (EC 2.4.1.374)
GT109	UDP-GalNAc: beta-1,4-N-acetylgalactosaminyltransferase (EC 2.4.1.-)
GT10	galactoside alpha-1,3/1,4-L-fucosyltransferase (EC 2.4.1.65); galactoside alpha-1,3-L-fucosyltransferase (EC 2.4.1.152); glycoprotein alpha-1,3-L-fucosyltransferase (EC 2.4.1.214)
GT110	UDP-D-xylose:ribitol-5-phosphate beta-1,4-xylosyltransferase (EC 2.4.2.-)
GT111	UDP-Galf: beta-1,3-galactofuranosyltransferase (EC 2.4.1.-)
GT11	GDP-L-Fuc: galactoside alpha-1,2-L-fucosyltransferase (EC 2.4.1.69); GDP-L-Fuc: beta-LacNac alpha-1,3-L-fucosyltransferase (EC 2.4.1.-)
GT12	[N-acetylneuraminyl]-galactosylglucosylceramide N-acetylgalactosaminyltransferase (EC 2.4.1.92).
GT13	alpha-1,3-mannosyl-glycoprotein beta-1,2-N-acetylglucosaminyltransferase (EC 2.4.1.101)
GT14	beta-1,3-galactosyl-O-glycosyl-glycoprotein beta-1,6-N-acetylglucosaminyltransferase (EC 2.4.1.102); N-acetyllactosaminide beta-1,6-N-acetylglucosaminyltransferase (EC 2.4.1.150); protein O-beta-xylosyltransferase (EC 2.4.2.26); UDP-GlcA:arabinogalactan beta-glucuronosyltransferase (EC 2.4.1.-)
GT15	glycolipid 2-alpha-mannosyltransferase (EC 2.4.1.131); GDP-Man: alpha-1,2-mannosyltransferase (EC 2.4.1.-).
GT16	alpha-1,6-mannosyl-glycoprotein beta-1,2-N-acetylglucosaminyltransferase (EC 2.4.1.143).
GT17	beta-1,4-mannosyl-glycoprotein beta-1,4-N-acetylglucosaminyltransferase (EC 2.4.1.144).
GT18	alpha-1,3(6)-mannosylglycoprotein beta-1,6-N-acetyl-glucosaminyltransferase (EC 2.4.1.155).
GT19	lipid-A-disaccharide synthase (EC 2.4.1.182).
GT1	UDP-glucuronosyltransferase (EC 2.4.1.17); zeatin O-beta-xylosyltransferase (EC 2.4.2.40); 2-hydroxyacylsphingosine 1-beta-galactosyltransferase (EC 2.4.1.45); N-acylsphingosine galactosyltransferase (EC 2.4.1.47); flavonol 3-O-glucosyltransferase (EC 2.4.1.91); anthocyanidin 3-O-glucosyltransferase (EC 2.4.1.115); sinapate 1-glucosyltransferase (EC 2.4.1.120); indole-3-acetate beta-glucosyltrans…
GT20	alpha,alpha-trehalose-phosphate synthase [UDP-forming] (EC 2.4.1.15); Glucosylglycerol-phosphate synthase (EC 2.4.1.213); trehalose-6-P phosphatase (EC 3.1.3.12); [retaining] GDP-valeniol: validamine 7-phosphate valeniolyltransferase (EC 2.-.-.-)
GT21	UDP-Glc: ceramide beta-glucosyltransferase (EC 2.4.1.80).
GT22	Dol-P-Man: Man6GlcNAc2-PP-Dol alpha-1,2-mannosyltransferase (EC 2.4.1.259); Dol-P-Man: Man8GlcNAc2-PP-Dol alpha-1,2-mannosyltransferase (EC 2.4.1.261); Dol-P-Man: Man2-GlcNAc-phosphatidylinositol alpha-1,2-mannosyltransferase (EC 2.4.1.-); Dol-P-Man: Man3-GlcNAc-phosphatidylinositol alpha-1,2-mannosyltransferase (EC 2.4.1.-)
GT23	N-acetyl-beta-D-glucosaminide alpha-1,6-L-fucosyltransferase (EC 2.4.1.68); chitin-oligosaccharide alpha-1,6-L-fucosyltransferase (EC 2.4.1.-)
GT24	UDP-Glc: glycoprotein alpha-glucosyltransferase (EC 2.4.1.-).
GT25	lipopolysaccharide beta-1,4-galactosyltransferase (EC 2.4.1.-); beta-1,3-glucosyltransferase (EC 2.4.1.-); beta-1,2-glucosyltransferase (EC 2.4.1.-); beta-1,2-galactosyltransferase (EC 2.4.1.-); LPS beta-1,4-galactosyltransferase (EC 2.4.1.-); occidiofungin beta-xylosyltransferase (EC 2.4.2.-); UDP-Gal:procollagen beta-galactosyltransferase (EC 2.4.1.50)
GT26	UDP-ManNAcA: beta-N-acetyl mannosaminuronyltransferase (EC 2.4.1.-); UDP-ManNAc: beta-N-acetyl-mannosaminyltransferase (EC 2.4.1.-); UDP-Glc: beta-1,4-glucosyltransferase (EC 2.4.1.-); beta-1,4-galactosyltransferase (EC 2.4.1.-)
GT27	polypeptide alpha-N-acetylgalactosaminyltransferase (EC 2.4.1.41)
GT28	1,2-diacylglycerol 3-beta-galactosyltransferase (EC 2.4.1.46); 1,2-diacylglycerol 3-beta-glucosyltransferase (EC 2.4.1.157); UDP-GlcNAc: Und-PP-MurAc-pentapeptide beta-N-acetylglucosaminyltransferase (EC 2.4.1.227); digalactosyldiacylglycerol synthase (EC 2.4.1.241)
GT29	sialyltransferase (EC 2.4.99.-); beta-galactoside alpha-2,6-sialyltransferase (EC 2.4.99.1); alpha-N-acetylgalactosaminide alpha-2,6-sialyltransferase (EC 2.4.99.3); beta-galactoside alpha-2,3-sialyltransferase (EC 2.4.99.4); N-acetyllactosaminide alpha-2,3-sialyltransferase (EC 2.4.99.6); (alpha-N-acetyl-neuraminyl-2,3-beta-galactosyl-1,3)-N-acetylgalactosaminide alpha-2,6-sialyltransferase (EC …
GT2	cellulose synthase (EC 2.4.1.12); chitin synthase (EC 2.4.1.16); dolichyl-phosphate beta-D-mannosyltransferase (EC 2.4.1.83); dolichyl-phosphate beta-glucosyltransferase (EC 2.4.1.117); N-acetylglucosaminyltransferase (EC 2.4.1.-); N-acetylgalactosaminyltransferase (EC 2.4.1.-); hyaluronan synthase (EC 2.4.1.212); chitin oligosaccharide synthase (EC 2.4.1.-); beta-1,3-glucan synthase (EC 2.4.1.34…
GT30	CMP-beta-KDO: alpha-3-deoxy-D-manno-octulosonic-acid (KDO) transferase (EC 2.4.99.-).
GT31	N-acetyllactosaminide beta-1,3-N-acetylglucosaminyltransferase (EC 2.4.1.149); Glycoprotein-N-acetylgalactosamine 3-beta-galactosyltransferase (EC 2.4.1.122); fucose-specific beta-1,3-N-acetylglucosaminyltransferase (EC 2.4.1.-); globotriosylceramide beta-1,3-GalNAc transferase (EC 2.4.1.79); chondroitin synthase (beta-1,3-GlcUA and beta-1,4-GalNAc transferase (EC 2.4.1.175); chondroitin beta-1,3…
GT32	alpha-1,6-mannosyltransferase (EC 2.4.1.-); alpha-1,4-N-acetylglucosaminyltransferase (EC 2.4.1.-); alpha-1,4-N-acetylgalactosaminyltransferase (EC 2.4.1.-); GDP-Man: inositol-phosphorylceramide transferase (EC 2.4.1.-); UDP-Gal: beta-galactoside alpha-1,4-galactosyltransferase (EC 2.4.1.-); UDP-Gal: lactose/N-acetyl-lactosamine alpha-1,4-galactosyltransferase (EC 2.4.1.-); UDP-Glc: protein alpha…
GT33	GDP-Man: chitobiosyldiphosphodolichol beta-mannosyltransferase (EC 2.4.1.142).
GT34	UDP-Gal: galactomannan alpha-1,6-galactosyltransferase (EC 2.4.1.-); UDP-Xyl: xyloglucan alpha-1,6-xylosyltransferase (EC 2.4.2.39); alpha-1,2-galactosyltransferase (EC 2.4.1.-)
GT35	glycogen or starch phosphorylase (EC 2.4.1.1).
GT36	Deleted: now family GH94
GT37	galactoside 2-L-fucosyltransferase (EC 2.4.1.69)
GT38	polysialyltransferase (EC 2.4.-.-)
GT39	Dol-P-Man: protein alpha-mannosyltransferase (EC 2.4.1.109)
GT3	glycogen synthase (EC 2.4.1.11).
GT40	beta-1,3-galactofuranosyltransferases (EC 2.4.1.-)
GT41	UDP-GlcNAc: peptide beta-N-acetylglucosaminyltransferase (EC 2.4.1.255); UDP-Glc: peptide N-beta-glucosyltransferase (EC 2.4.1.-)
GT42	CMP-NeuAc alpha-2,3-sialyltransferase (EC 2.4.99.-)
GT43	beta-glucuronyltransferase (EC 2.4.1.135); UDP-Xyl: xylan beta-1,4-xylosyltransferase (EC 2.4.2.-)
GT44	UDP-Glc: alpha-glucosyltransferase (EC 2.4.1.-); UDP-GlcNAc: alpha-N-acetylglucosaminyltransferase (EC 2.4.1.-).
GT45	alpha-N-acteylglucosaminyltransferase (EC 2.4.1.-)
GT46	Deleted
GT47	heparan beta-glucuronyltransferase (EC 2.4.1.225); xyloglucan beta-galactosyltransferase (EC 2.4.1.-); heparan synthase (EC 2.4.1.-); arabinan alpha-L-arabinosyltransferase (EC 2.4.2.-).
GT48	1,3-beta-glucan synthase (EC 2.4.1.34)
GT49	beta-1,3-N-acetylglucosaminyltransferase (EC 2.4.1.-).
GT4	sucrose synthase (EC 2.4.1.13); sucrose-phosphate synthase (EC 2.4.1.14); alpha-glucosyltransferase (EC 2.4.1.52); lipopolysaccharide N-acetylglucosaminyltransferase (EC 2.4.1.56); phosphatidylinositol alpha-mannosyltransferase (EC 2.4.1.57); GDP-Man: Man1GlcNAc2-PP-dolichol alpha-1,3-mannosyltransferase (EC 2.4.1.132); GDP-Man: Man3GlcNAc2-PP-dolichol/Man4GlcNAc2-PP-dolichol alpha-1,2-mannosyltr…
GT50	Dol-P-Man alpha-1,4-mannosyltransferase (EC 2.4.1.-)
GT51	murein polymerase (EC 2.4.1.129).
GT52	alpha-2,3-sialyltransferase (EC 2.4.99.4); alpha-glucosyltransferase (EC 2.4.1.-)
GT53	UDP-L-Ara: alpha-L-arabinosyltransferase (EC 2.4.2.-); DecapreP-Araf: alpha-(1,3)-arabinosyltransferase (EC 2.4.2.-); DecapreP-Araf: Lipoarabinomannan alpha-(1,5)-arabinosyltransferase (EC 2.4.2.-)
GT54	UDP-GlcNAc: alpha-1,3-D-mannoside beta-1,4-N-acetylglucosaminyltransferase (EC 2.4.1.145)
GT55	GDP-Man: mannosyl-3-phosphoglycerate synthase (EC 2.4.1.217)
GT56	TDP-Fuc4NAc: lipid II Fuc4NAc transferase (EC 2.4.1.-)
GT57	Dol-P-Glc: alpha-1,3-glucosyltransferase (EC 2.4.1.-)
GT58	Dol-P-Man: Man5GlcNAc2-PP-Dol alpha-1,3-mannosyltransferase (EC 2.4.1.258)
GT59	Dol-P-Glc: Glc2Man9GlcNAc2-PP-Dol alpha-1,2-glucosyltransferase (EC 2.4.1.256)
GT5	UDP-Glc: glycogen glucosyltransferase (EC 2.4.1.11); ADP-Glc: starch glucosyltransferase (EC 2.4.1.21); NDP-Glc: starch glucosyltransferase (EC 2.4.1.242); UDP-Glc: alpha-1,3-glucan synthase (EC 2.4.1.183) UDP-Glc: alpha-1,4-glucan synthase (EC 2.4.1.-)
GT60	UDP-GlcNAc: polypeptide alpha-N-acetylglucosaminyltransferase (EC 2.4.1.-); UDP-GlcNAc: hydroxyproline polypeptide alpha-N-acetylglucosaminyltransferase (EC 2.4.1.-)
GT61	beta-1,2-xylosyltransferase (EC 2.4.2.38) ; protein O-beta-N-acetylglucosaminyltransferase (EC 2.4.1.94) ; xylan alpha-1,3-arabinofuranosyltransferase (EC 2.4.2.-) ;
GT62	alpha-1,2-mannosyltransferase (EC 2.4.1.-); alpha-1,6-mannosyltransferase (EC 2.4.1.-)
GT63	UDP-Glc: DNA beta-glucosyltransferase (EC 2.4.1.27)
GT64	UDP-GlcNAc: heparan alpha-N-acetylhexosaminyltransferase (EC 2.4.1.224)
GT65	GDP-Fuc: protein O-alpha-fucosyltransferase (EC 2.4.1.-)
GT66	dolichyl-diphosphooligosaccharide-protein glycotransferase (EC 2.4.99.18); undecaprenyl-diphosphooligosaccharide-protein glycotransferase (EC 2.4.99.19)
GT67	UDP-Gal: phosphoglycan beta-1,3-galactosyltransferase 1 (SCG1) (EC 2.4.1.-); UDP-GlcNAc beta-1,2-N-acetylglucosaminyltransferase (EC 2.4.1.-)
GT68	GDP-Fuc: protein O-alpha-fucosyltransferase (EC 2.4.1.-)
GT69	GDP-Man: alpha-1,3-mannosyltransferase (EC 2.4.1.-)
GT6	alpha-1,3-galactosyltransferase (EC 2.4.1.87); alpha-1,3 N-acetylgalactosaminyltransferase (EC 2.4.1.40); alpha-galactosyltransferase (EC 2.4.1.37); globoside alpha-N-acetylgalactosaminyltransferase (EC 2.4.1.88).
GT70	UDP-GlcA: beta-glucuronosyltransferase (EC 2.4.1.17)
GT71	alpha-mannosyltransferase (EC 2.4.1.-)
GT72	UDP-Glc: DNA alpha-glucosyltransferase (EC 2.4.1.26)
GT73	CMP-beta-KDO: alpha-3-deoxy-D-manno-octulosonic-acid (KDO) transferase (EC 2.4.99.-).
GT74	alpha-1,2-L-fucosyltransferase (EC 2.4.1.69)
GT75	UDP-Glc: self-glucosylating beta-glucosyltransferase (EC 2.4.1.-); UDP-L-arabinopyranose mutase (EC 5.4.99.-)
GT76	Dol-P-Man: alpha-1,6-mannosyltransferase (EC 2.4.1.-)
GT77	alpha-xylosyltransferase (EC 2.4.2.39); alpha-1,3-galactosyltransferase (EC 2.4.1.37); arabinosyltransferase (EC 2.4.2.-); arabinosyltransferase (EC 2.4.2.-)
GT78	GDP-Man: alpha-mannosyltransferase (mannosylglycerate synthase) (EC 2.4.1.-)
GT79	GDP-D-Ara: phosphoglycan alpha-1,2-D-arabinopyranosyltransferase 1 (EC 2.4.2.-)
GT7	lactose synthase (EC 2.4.1.22); beta-N-acetylglucosaminyl-glycopeptide beta-1,4-galactosyltransferase (EC 2.4.1.38); N-acetyllactosamine synthase (EC 2.4.1.90); xylosylprotein beta-4-galactosyltransferase (EC 2.4.1.133); UDP-Gal: neolactotriaosylceramide beta-1,4-galactosyltransferase (EC 2.4.1.275); beta-1,4-N-acetylglucosaminyltransferase (EC 2.4.1.-); UDP-GalNAc: beta-1,3-glucuronyl-N-acetylga…
GT80	beta-galactoside alpha-2,6-sialyltransferase (EC 2.4.99.1); beta-galactoside alpha-2,3-sialyltransferase (EC 2.4.99.4)
GT81	NDP-Glc: glucosyl-3-phosphoglycerate synthase (EC 2.4.1.266); NDP-Man: mannosyl-3-phosphoglycerate synthase (EC 2.4.1.217);
GT82	UDP-GalNAc: beta-1,4-N-acetylgalactosaminyltransferase (EC 2.4.1.-)
GT83	undecaprenyl phosphate-alpha-L-Ara4N: 4-amino-4-deoxy-beta-L-arabinosyltransferase (EC 2.4.2.43); dodecaprenyl phosphate-beta-galacturonic acid: lipopolysaccharide core alpha-galacturonosyl transferase (EC 2.4.1.-)
GT84	cyclic beta-1,2-glucan synthase (EC 2.4.1.-);
GT85	beta-D-arabinofuranosyl monophosphoryldecaprenol: galactan alpha-D-arabinofuranosyltransferase (EC 2.4.2.-)
GT86	Deleted.
GT87	polyprenol-P-Man: alpha-1,2-mannosyltransferase (EC 2.4.1.-)
GT88	UDP-Glc: alpha-glucosyltransferase (EC 2.4.1.-)
GT89	beta-D-arabinofuranosyl-1-monophosphoryldecaprenol : arabinan beta-1,2-arabinofuranosyltransferase (EC 2.4.2.-)
GT8	lipopolysaccharide alpha-1,3-galactosyltransferase (EC 2.4.1.44); UDP-Glc: (glucosyl)lipopolysaccharide alpha-1,2-glucosyltransferase (EC 2.4.1.-); lipopolysaccharide glucosyltransferase 1 (EC 2.4.1.58); glycogenin glucosyltransferase (EC 2.4.1.186); inositol 1-alpha-galactosyltransferase (galactinol synthase) (EC 2.4.1.123); homogalacturonan alpha-1,4-galacturonosyltransferase (EC 2.4.1.43); UDP…
GT90	UDP-Xyl: (mannosyl) glucuronoxylomannan/galactoxylomannan beta-1,2-xylosyltransferase (EC 2.4.2.-); UDP-Glc: protein O-beta-glucosyltransferase (EC 2.4.1.-); UDP-Xyl: protein O-beta-xylosyltransferase (EC 2.4.2.-)
GT91	beta-1,2-mannosyltransferase (EC 2.4.1.-)
GT92	UDP-Gal: N-glycan core alpha-1,6-fucoside beta-1,4-galactosyltransferase (EC 2.4.1.-); UDP-Gal: beta-galactoside beta-1,4-galactosyltransferase (EC 2.4.1.-)
GT93	UDP-GluA : alpha-glucuronyltransferase (EC 2.4.1.-) involved in GAG polymerization
GT94	GDP-Man: GlcA-beta-1,2-Man-alpha-1,3-Glc-beta-1,4-Glc-alpha-1-PP-undecaprenol beta-1,4-mannosyltransferase (2.4.1.251)
GT95	UDP-beta-L-Araf:hydroxyproline beta-L-arabinofuranosyltransferase (EC 2.4.2.-);
GT96	UDP-Gal: peptidyl serine alpha-galactosyltransferase (EC 2.4.1.-)
GT97	CMP-Neu5Ac:alpha-galactoside alpha-2,6-sialyltransferase (EC 2.4.99.-); CMP-Neu5Ac:alpha-glucoside alpha-2,6-sialyltransferase (EC 2.4.99.-);
GT98	Dol-P-Man : protein [tryptophan] alpha-C-mannosyltransferase (EC 2.4.1.-)
GT99	CMP-beta-KDO 3-deoxy-beta-D-manno-oct-2-ulosonic acid transferase (EC 2.4.99.-)
GT9	lipopolysaccharide N-acetylglucosaminyltransferase (EC 2.4.1.56); heptosyltransferase (EC 2.4.-.-).
PL0	Polysaccharide lyases not yet assigned to a family.
PL10	pectate lyase (EC 4.2.2.2)
PL11	rhamnogalacturonan endolyase (EC 4.2.2.23); rhamnogalacturonan exolyase (EC 4.2.2.24)
PL12	heparin-sulfate lyase (EC 4.2.2.8); heparin lyase / heparin lyase I (EC 4.2.2.7)
PL13	heparin lyase (EC 4.2.2.7);
PL14	alginate lyase (EC 4.2.2.3); exo-oligoalginate lyase (EC 4.2.2.26); beta-1,4-glucuronan lyase (EC 4.2.2.14); alginate lyase (EC 4.2.2.-)
PL15	alginate lyase (EC 4.2.2.3); oligoalginate lyase / exo-alginate lyase (EC 4.2.2.26); heparin lyase / heparin lyase I (EC 4.2.2.7); heparin-sulfate lyase / heparin lyase III (EC 4.2.2.8)
PL16	hyaluronan lyase (EC 4.2.2.1).
PL17	alginate lyase (EC 4.2.2.3); oligoalginate lyase (EC 4.2.2.26)
PL18	alginate lyase (EC 4.2.2.3); poly(alpha-L-guluronate) lyase / G-specific alginate lyase (EC 4.2.2.11); MG-specific alginate lyase (EC 4.2.2.-)
PL19	Deleted: now family GH91
PL1	pectate lyase (EC 4.2.2.2); exo-pectate lyase (EC 4.2.2.9); pectin lyase (EC 4.2.2.10).
PL20	endo-beta-1,4-glucuronan lyase (EC 4.2.2.14)
PL21	heparin lyase (EC 4.2.2.7); heparin-sulfate lyase (EC 4.2.2.8); acharan-sulfate lyase (EC 4.2.2.-)
PL22	oligogalacturonate lyase / oligogalacturonide lyase (EC 4.2.2.6)
PL23	chondroitin lyase (EC 4.2.2.-);
PL24	ulvan lyase (EC 4.2.2.-).
PL25	ulvan lyase (EC 4.2.2.-).
PL26	rhamnogalacturonan exolyase (EC 4.2.2.24).
PL27	L-rhamnose-alpha-1,4-D-glucuronate lyase (EC 4.2.2.-)
PL28	ulvan lyase (EC 4.2.2.-)
PL29	chondroitin-sulfate ABC endolyase (EC 4.2.2.20)
PL2	pectate lyase (EC 4.2.2.2); exo-polygalacturonate lyase (EC 4.2.2.9).
PL30	hyaluronate lyase (EC 4.2.2.1)
PL31	endo-beta-1,4-glucuronan lyase (EC 4.2.2.14); poly(beta-mannuronate) lyase / M-specific alginate lyase (EC 4.2.2.3)
PL32	poly(beta-mannuronate) lyase / M-specific alginate lyase (EC 4.2.2.3)
PL33	hyaluronate lyase (EC 4.2.2.1); gellan lyase (EC 4.2.2.25); chondroitin sulfate lyase (EC 4.2.2.20)
PL34	alginate lyase (EC 4.2.2.-)
PL35	chondroitin lyase / chondroitinase (EC 4.2.2.-); chondroitin AC lyase (EC 4.2.2.5)
PL36	poly(beta-mannuronate) lyase / M-specific alginate lyase (EC 4.2.2.3)
PL37	chondroitin-sulfate ABC endolyase (EC 4.2.2.20); heparin-sulfate lyase / heparin lyase III (EC 4.2.2.8); ulvan lyase (EC 4.2.2.-)
PL38	endo-beta-1,4-glucuronan lyase (EC 4.2.2.14)
PL39	alginate lyase (EC 4.2.2.-)
PL3	pectate lyase (EC 4.2.2.2).
PL40	ulvan lyase (EC 4.2.2.-)
PL4	rhamnogalacturonan endolyase (EC 4.2.2.23).
PL5	alginate lyase (EC 4.2.2.3); endo-beta-1,4-glucuronan lyase (EC 4.2.2.14)
PL6	alginate lyase (EC 4.2.2.3); chondroitinase B (EC 4.2.2.19); MG-specific alginate lyase (EC 4.2.2.-); poly(alpha-L-guluronate) lyase / G-specific alginate lyase (EC 4.2.2.11); ; oligoalginate lyase / exo-alginate lyase (EC 4.2.2.26)
PL7	poly(beta-mannuronate) lyase / M-specific alginate lyase (EC 4.2.2.3); alpha-L-guluronate lyase / G-specific alginate lyase (EC 4.2.2.11); poly-(MG)-lyase / MG-specific alginate lyase (EC 4.2.2.-); endo-beta-1,4-glucuronan lyase (EC 4.2.2.14); oligoalginate lyase / exo-alginate lyase (EC 4.2.2.26)
PL8	hyaluronate lyase (EC 4.2.2.1); chondroitin AC lyase (EC 4.2.2.5); xanthan lyase (EC 4.2.2.12); chondroitin ABC lyase (EC 4.2.2.20); heparin lyase / heparin lyase I (EC 4.2.2.7)
PL9	pectate lyase (EC 4.2.2.2); exopolygalacturonate lyase (EC 4.2.2.9); thiopeptidoglycan lyase (EC 4.2.2.-); rhamnogalacturonan endolyase (EC 4.2.2.23)

## Sheet: Total
CAZy_name	CON	CON	CON	CON	CON	CON	3-NOP	3-NOP	3-NOP	3-NOP	3-NOP	3-NOP		3-NOP	3-NOP-SD	CON	CONSD	SEM	P-VALUE
AA	0.265435	0.275229	0.202162	0.176704	0.944434	0.251546	0.374933	0.209999	0.284192	0.296326	0.34895	0.486513	AA	0.333486	0.09427	0.352585	0.29245	0.15788	0.1495
CBM	39.8263	40.5949	40.2265	44.0898	41.1726	46.3996	56.1153	55.0287	62.2207	49.7588	58.2238	48.9499	CBM	55.0495	5.05637	42.0516	2.61674	3.13253	0.0039
CE	154.98	142.182	154.806	154.53	169.625	162.248	171.976	164.506	174.225	172.803	171.007	148.35	CE	167.145	9.80429	156.395	9.15741	7.74108	0.0547
GH	2161.47	2141.97	2059.51	2185.53	2213.28	2158.67	2020.53	2179.19	2051.63	2260.23	2164.24	1976.23	GH	2108.67	109.173	2153.4	52.2618	65.9055	0.5218
GT	786.205	742.715	698.434	838.404	856.87	800.642	786.836	814.874	875.237	898.049	915.508	812.065	GT	850.428	52.7227	787.212	59.1876	45.6872	0.0782
PL	64.0949	78.8575	71.7761	84.4538	144.039	53.9766	51.6613	55.7823	56.4478	94.0662	102.94	76.727	PL	72.9374	21.8166	82.8664	31.8456	21.9075	0.631
Total	3206.84	3146.59	3024.95	3307.19	3425.93	3222.18	3087.49	3269.6	3220.04	3475.2	3412.26	3062.81	总计	3254.57	167.123	3222.28	136.81	124.08	0.7488
