# Supplementary material for: Metatranscriptomic changes in the propionate pathway and carbohydrate enzyme revealed the rebalancing mechanism of rumen microbiota after CH4 inhibition by 3-NOP
Source: Research Square preprint supplement (doi:10.21203/rs.3.rs-7121971/v1), 2025-08-11
Supplement: Supplementary file 4 [file 64c9beb8e45ac9168531c64e.xlsx]

## Sheet: rawdata
Genome	specise	phyum	class	order	family	genus	spcise	CON1	CON2	CON3	CON4	CON5	CON6	3-NOP1	3-NOP2	3-NOP3	3-NOP4	3-NOP5	3-NOP6
RGMC.19638	d__Bacteria	p__Actinomycetota	c__Actinomycetes	o__Propionibacteriales	f__Propionibacteriaceae	g__Cutibacterium	s__Cutibacterium acnes	0	0	0	0	92.7168	0	0	0	0	0	99.6993	0
RGMC.26919	d__Bacteria	p__Actinomycetota	c__Coriobacteriia	o__Coriobacteriales	f__CADBOM01	g__CADBOM01	s__	0	356.639	412.325	300.84	0	313.302	293.195	251.823	394.116	0	420.519	243.071
RGMC.17810	d__Bacteria	p__Actinomycetota	c__Coriobacteriia	o__Coriobacteriales	f__Eggerthellaceae	g__SIG42	s__SIG42 sp015062605	0	0	0	0	0	0	0	0	149.874	0	170.626	0
RGMC.37544	d__Bacteria	p__Actinomycetota	c__Coriobacteriia	o__Coriobacteriales	f__Eggerthellaceae	g__UBA9715	s__UBA9715 sp015062685	0	0	0	0	0	0	0	0	0	0	0	0
RGMC.17816	d__Bacteria	p__Actinomycetota	c__Coriobacteriia	o__Coriobacteriales	f__Eggerthellaceae	g__UBA9715	s__UBA9715 sp015062685	0	0	0	0	0	0	0	0	0	0	0	0
RGMC.37587	d__Bacteria	p__Actinomycetota	c__Coriobacteriia	o__Coriobacteriales	f__Eggerthellaceae	g__UBA9715	s__UBA9715 sp015062685	0	0	0	0	0	0	0	0	0	0	0	0
RGMC.21345	d__Bacteria	p__Actinomycetota	c__Coriobacteriia	o__Coriobacteriales	f__Eggerthellaceae	g__UBA9715	s__UBA9715 sp902764575	0	558.631	0	0	0	0	313.153	0	349.233	0	402.49	0
RGMC.32967	d__Bacteria	p__Actinomycetota	c__Coriobacteriia	o__Coriobacteriales	f__Eggerthellaceae	g__UBA9715	s__UBA9715 sp902764575	0	399.516	0	0	0	0	262.739	271.206	264.773	0	242.552	0
RGMC.14548	d__Bacteria	p__Actinomycetota	c__Coriobacteriia	o__Coriobacteriales	f__UMGS124	g__RGIG5691	s__RGIG5691 sp017515595	0	0	0	0	0	0	127.537	0	173.915	0	216.853	126.145
RGMC.12907	d__Bacteria	p__Armatimonadota	c__UBA5829	o__UBA5829	f__UBA5829	g__RGIG10368	s__	205.499	216.406	192.858	219.432	239.383	189.12	269.638	226.185	213.475	231.963	197.033	287.608
RGMC.13424	d__Bacteria	p__Armatimonadota	c__UBA5829	o__UBA5829	f__UBA5829	g__RGIG10368	s__RGIG10368 sp017958015	0	0	0	0	0	0	169.592	0	159.115	0	133.402	173.027
RGMC.17463	d__Bacteria	p__Armatimonadota	c__UBA5829	o__UBA5829	f__UBA5829	g__RGIG10368	s__RGIG10368 sp017958015	0	0	0	0	0	0	154.271	0	135	0	0	155.007
RGMC.13384	d__Bacteria	p__Armatimonadota	c__UBA5829	o__UBA5829	f__UBA5829	g__RGIG10368	s__RGIG10368 sp017958015	0	0	0	0	0	0	115.2	0	97.8164	0	0	123.707
RGMC.12863	d__Bacteria	p__Armatimonadota	c__UBA5829	o__UBA5829	f__UBA5829	g__RGIG7931	s__RGIG7931 sp017445025	0	0	0	0	0	0	123.413	0	121.455	0	0	0
RGMC.12780	d__Bacteria	p__Armatimonadota	c__UBA5829	o__UBA5829	f__UBA5829	g__RGIG7931	s__RGIG7931 sp017959625	777.983	522.924	504.931	533.761	553.602	476.534	205.312	297.732	0	295.423	0	296.967
RGMC.31624	d__Bacteria	p__Bacillota	c__Bacilli	o__Lactobacillales	f__Streptococcaceae	g__Streptococcus	s__Streptococcus equinus	365.423	0	0	0	0	0	0	0	0	0	0	0
RGMC.35086	d__Bacteria	p__Bacillota	c__Bacilli	o__Lactobacillales	f__Streptococcaceae	g__Streptococcus	s__Streptococcus equinus	220.636	0	0	0	0	0	0	0	0	0	0	0
RGMC.35729	d__Bacteria	p__Bacillota	c__Bacilli	o__Lactobacillales	f__Streptococcaceae	g__Streptococcus	s__Streptococcus equinus	193.225	0	0	0	0	0	0	0	0	0	0	0
RGMC.28971	d__Bacteria	p__Bacillota_A	c__Clostridia	o__Christensenellales	f__Aristaeellaceae	g__Aristaeella	s__	2332.44	2718.32	2855.74	2083.1	1963.92	2257.73	2298.71	2698.55	2173.45	1750.88	2015.55	1980.66
RGMC.37882	d__Bacteria	p__Bacillota_A	c__Clostridia	o__Christensenellales	f__Aristaeellaceae	g__Aristaeella	s__	2423.83	2598.64	3003.22	1740.16	1595.46	2127.09	2430.69	2513.23	2364.13	1587.29	2078.57	1840.01
RGMC.38436	d__Bacteria	p__Bacillota_A	c__Clostridia	o__Christensenellales	f__Aristaeellaceae	g__Aristaeella	s__	2265.54	2044.41	2448.12	1280.08	1073.5	1841.17	1805.58	1883.66	1623.84	924.976	927.319	1758.88
RGMC.29898	d__Bacteria	p__Bacillota_A	c__Clostridia	o__Christensenellales	f__Aristaeellaceae	g__Aristaeella	s__	2111.56	1892.47	2309.88	1185.23	980.613	1733.49	1696.09	1771.85	1539.99	850.908	853.365	1656.42
RGMC.10958	d__Bacteria	p__Bacillota_A	c__Clostridia	o__Christensenellales	f__Aristaeellaceae	g__Aristaeella	s__	1053.4	992.17	1189.15	640.88	608.169	787.745	0	0	0	0	468.911	0
RGMC.40024	d__Bacteria	p__Bacillota_A	c__Clostridia	o__Christensenellales	f__Aristaeellaceae	g__Aristaeella	s__	235.582	0	0	0	0	0	0	0	0	0	0	0
RGMC.18989	d__Bacteria	p__Bacillota_A	c__Clostridia	o__Christensenellales	f__Aristaeellaceae	g__Aristaeella	s__Aristaeella lactis	0	0	0	0	0	0	0	0	0	0	0	0
RGMC.11960	d__Bacteria	p__Bacillota_A	c__Clostridia	o__Christensenellales	f__Aristaeellaceae	g__Aristaeella	s__Aristaeella sp017404985	0	0	0	0	0	0	0	0	0	0	0	0
RGMC.12315	d__Bacteria	p__Bacillota_A	c__Clostridia	o__Christensenellales	f__Aristaeellaceae	g__Aristaeella	s__Aristaeella sp017427165	764.974	545.806	576.909	429.444	439.947	451.556	351.419	397.384	331.719	0	318.459	317.662
RGMC.29297	d__Bacteria	p__Bacillota_A	c__Clostridia	o__Christensenellales	f__Aristaeellaceae	g__Aristaeella	s__Aristaeella sp017427165	337.383	225.77	0	0	0	0	0	0	0	0	0	0
RGMC.12146	d__Bacteria	p__Bacillota_A	c__Clostridia	o__Christensenellales	f__Aristaeellaceae	g__Aristaeella	s__Aristaeella sp017431005	799.618	796.801	851.384	650.855	711.719	670.62	447.591	528.724	459.628	423.066	482.348	519.774
RGMC.14527	d__Bacteria	p__Bacillota_A	c__Clostridia	o__Christensenellales	f__Aristaeellaceae	g__Aristaeella	s__Aristaeella sp017512985	2208.72	1989.4	2365.01	0	0	1606.79	0	0	0	0	725.134	0
RGMC.32769	d__Bacteria	p__Bacillota_A	c__Clostridia	o__Christensenellales	f__Aristaeellaceae	g__Aristaeella	s__Aristaeella sp946414315	396.223	380.501	404.735	0	0	298.48	0	0	0	0	260.958	0
RGMC.10727	d__Bacteria	p__Bacillota_A	c__Clostridia	o__Christensenellales	f__Aristaeellaceae	g__Firm-10	s__	592.89	422.174	425.19	333.379	322.298	319.496	209.27	255.308	183.101	212.291	166.816	246.592
RGMC.15238	d__Bacteria	p__Bacillota_A	c__Clostridia	o__Christensenellales	f__Aristaeellaceae	g__Firm-10	s__Firm-10 sp017527065	1589.04	1047.96	1095.62	762.353	699.474	794.041	435.5	515.91	347.127	397.875	285.769	566.545
RGMC.20541	d__Bacteria	p__Bacillota_A	c__Clostridia	o__Christensenellales	f__Aristaeellaceae	g__Firm-10	s__Firm-10 sp902790345	1916.31	1099.33	1219.17	775.801	721.921	861.857	479.531	561.794	385.197	417.639	318.317	698.02
RGMC.16136	d__Bacteria	p__Bacillota_A	c__Clostridia	o__Christensenellales	f__Aristaeellaceae	g__RUG11272	s__RUG11272 sp017552615	3137.15	2615.85	3024.24	0	0	2307.91	0	0	0	0	0	0
RGMC.17332	d__Bacteria	p__Bacillota_A	c__Clostridia	o__Christensenellales	f__Aristaeellaceae	g__RUG14130	s__RUG14130 sp017552535	1411.53	1035.49	1063.53	826.873	795.45	879.78	608.763	680.121	489.57	523.049	387.978	616.559
RGMC.16147	d__Bacteria	p__Bacillota_A	c__Clostridia	o__Christensenellales	f__Aristaeellaceae	g__RUG14130	s__RUG14130 sp017552535	714.494	567.373	548.565	473.464	506.399	452.731	285.819	329.486	248.487	278.163	227.983	311.187
RGMC.29315	d__Bacteria	p__Bacillota_A	c__Clostridia	o__Christensenellales	f__Aristaeellaceae	g__RUG14130	s__RUG14130 sp017552535	493.997	403.385	397.179	364.34	382.874	342.41	194.407	218.419	160.68	208.564	175.277	204.229
RGMC.29284	d__Bacteria	p__Bacillota_A	c__Clostridia	o__Christensenellales	f__Aristaeellaceae	g__RUG14130	s__RUG14130 sp017648805	174.097	169.296	164.457	0	0	138.474	0	0	0	0	0	0
RGMC.37458	d__Bacteria	p__Bacillota_A	c__Clostridia	o__Christensenellales	f__Aristaeellaceae	g__RUG563	s__	2660.8	2170.99	2378.42	1765.5	1598.35	2134.21	1651.65	2284.79	1472.38	1657.94	1105.61	1733.18
RGMC.27041	d__Bacteria	p__Bacillota_A	c__Clostridia	o__Christensenellales	f__Aristaeellaceae	g__RUG563	s__	2830.88	2450.46	2744.78	2124.15	1916.53	2372.39	1347.16	1861.2	1120.01	1478.33	1016.14	1383.29
RGMC.37510	d__Bacteria	p__Bacillota_A	c__Clostridia	o__Christensenellales	f__Aristaeellaceae	g__RUG563	s__	2090.15	1985.09	2117.18	1492.45	1374.84	1636.26	1409.84	1750.77	1238.82	1364.61	1042.25	1684.23
RGMC.39153	d__Bacteria	p__Bacillota_A	c__Clostridia	o__Christensenellales	f__Aristaeellaceae	g__RUG563	s__	1527.08	1455.56	1490.12	1149.17	993.279	1320.8	1512.91	1591.28	1016.28	1144.49	694.928	1343
RGMC.37441	d__Bacteria	p__Bacillota_A	c__Clostridia	o__Christensenellales	f__Aristaeellaceae	g__RUG563	s__	831.904	977.492	902.043	732.852	716.923	716.671	642.194	773.412	604.361	617.333	587.468	621.013
RGMC.29209	d__Bacteria	p__Bacillota_A	c__Clostridia	o__Christensenellales	f__Aristaeellaceae	g__RUG563	s__	812.802	531.144	535.96	417.115	405.412	418.66	0	0	0	0	0	0
RGMC.29947	d__Bacteria	p__Bacillota_A	c__Clostridia	o__Christensenellales	f__Aristaeellaceae	g__RUG563	s__	0	0	0	0	0	0	0	0	0	0	296.9	0
RGMC.30149	d__Bacteria	p__Bacillota_A	c__Clostridia	o__Christensenellales	f__Aristaeellaceae	g__RUG563	s__RUG563 sp017443295	19432.5	38245.6	37240.6	28954.7	22230.3	32367.3	36882.8	43310.9	32515.2	27285.9	23881.3	30051.5
RGMC.12639	d__Bacteria	p__Bacillota_A	c__Clostridia	o__Christensenellales	f__Aristaeellaceae	g__RUG563	s__RUG563 sp017448975	3720.81	3671.53	3594.99	3081.01	2780.5	3248.13	2746.35	3431	2485.15	2553.6	2049.85	2460.99
RGMC.15412	d__Bacteria	p__Bacillota_A	c__Clostridia	o__Christensenellales	f__Aristaeellaceae	g__RUG563	s__RUG563 sp017541205	2278.67	1530.97	1663.69	962.372	826.932	1333.93	989.097	1063.77	784.632	657.706	471.363	952.328
RGMC.29048	d__Bacteria	p__Bacillota_A	c__Clostridia	o__Christensenellales	f__Aristaeellaceae	g__RUG563	s__RUG563 sp902764565	7056.89	6000.8	6403.76	5342.17	5248.36	5685.01	4538.63	5000.56	4678.93	4482.51	4082.87	4795.44
RGMC.21368	d__Bacteria	p__Bacillota_A	c__Clostridia	o__Christensenellales	f__Aristaeellaceae	g__RUG563	s__RUG563 sp902764565	3376.84	3242.86	3297.75	2570.13	2661.23	2732.45	2280.7	2683.24	2402.85	2288.55	2113.34	2729.42
RGMC.20465	d__Bacteria	p__Bacillota_A	c__Clostridia	o__Christensenellales	f__Aristaeellaceae	g__RUG563	s__RUG563 sp902795275	1887.03	2694.38	2903.86	2285.49	2295.62	2500.89	2027.83	2851.41	1813.11	1797.38	1439.1	1740.19
RGMC.20990	d__Bacteria	p__Bacillota_A	c__Clostridia	o__Christensenellales	f__Aristaeellaceae	g__RUG563	s__RUG563 sp902795275	978.162	1343.88	1374.34	1067.2	1142.4	1151.35	1094.56	1328.17	1009.31	951.721	916.449	945.622
RGMC.18620	d__Bacteria	p__Bacillota_A	c__Clostridia	o__Christensenellales	f__Aristaeellaceae	g__RUG563	s__RUG563 sp905234985	4538.46	4809.4	4963.75	3916.18	3485.38	4227.83	3485.49	4539.56	3089.23	3512.75	2754.56	3329.69
RGMC.12811	d__Bacteria	p__Bacillota_A	c__Clostridia	o__Christensenellales	f__Aristaeellaceae	g__RUG756	s__RUG756 sp902803675	0	235.439	0	0	0	177.302	0	0	186.121	0	207.929	196.708
RGMC.13972	d__Bacteria	p__Bacillota_A	c__Clostridia	o__Christensenellales	f__Aristaeellaceae	g__SFMI01	s__	344.922	547.75	488.444	432.08	395.516	418.798	392.447	458.782	318.105	348.459	257.754	370.835
RGMC.29211	d__Bacteria	p__Bacillota_A	c__Clostridia	o__Christensenellales	f__Aristaeellaceae	g__SFMI01	s__SFMI01 sp017544935	0	0	0	0	0	0	0	0	118.188	0	0	120.436
RGMC.15486	d__Bacteria	p__Bacillota_A	c__Clostridia	o__Christensenellales	f__Aristaeellaceae	g__SFMI01	s__SFMI01 sp017544935	0	0	0	0	0	0	0	0	0	0	0	98.4487
RGMC.21014	d__Bacteria	p__Bacillota_A	c__Clostridia	o__Christensenellales	f__Aristaeellaceae	g__SFMI01	s__SFMI01 sp902764185	0	486.021	0	0	0	0	0	0	0	0	0	0
RGMC.23819	d__Bacteria	p__Bacillota_A	c__Clostridia	o__Christensenellales	f__Aristaeellaceae	g__SFMI01	s__SFMI01 sp902781945	0	327.357	0	0	0	0	0	0	0	0	0	0
RGMC.1874	d__Bacteria	p__Bacillota_A	c__Clostridia	o__Christensenellales	f__Aristaeellaceae	g__SFMI01	s__SFMI01 sp902781945	0	295.208	0	0	0	0	0	0	0	0	0	0
RGMC.19754	d__Bacteria	p__Bacillota_A	c__Clostridia	o__Christensenellales	f__Aristaeellaceae	g__SFMI01	s__SFMI01 sp902781945	0	286.167	0	0	0	0	0	0	0	0	0	0
RGMC.29207	d__Bacteria	p__Bacillota_A	c__Clostridia	o__Christensenellales	f__Aristaeellaceae	g__UBA1224	s__UBA1224 sp002309235	315.811	257.017	278.587	216.992	196.04	231.445	180.55	179.609	136.574	181.705	0	200.312
RGMC.11130	d__Bacteria	p__Bacillota_A	c__Clostridia	o__Christensenellales	f__Aristaeellaceae	g__UBA2862	s__	3659.34	3319.06	4418.45	2186.85	1465.35	2843.7	2131.69	1716.58	1655.05	946.675	937.619	1725.94
RGMC.37507	d__Bacteria	p__Bacillota_A	c__Clostridia	o__Christensenellales	f__Aristaeellaceae	g__UBA2862	s__	1075.57	1768.96	2230.75	1760.79	987.381	1723.65	1638.06	1707.12	1206.21	954.496	871.298	1230.74
RGMC.31982	d__Bacteria	p__Bacillota_A	c__Clostridia	o__Christensenellales	f__Aristaeellaceae	g__UBA2862	s__	342.52	504.009	480.707	436.637	391.061	366.988	329.206	402.584	342.776	297.783	371.823	299.306
RGMC.27347	d__Bacteria	p__Bacillota_A	c__Clostridia	o__Christensenellales	f__Aristaeellaceae	g__UBA2862	s__	0	408.795	0	0	0	0	0	0	0	0	0	0
RGMC.22032	d__Bacteria	p__Bacillota_A	c__Clostridia	o__Christensenellales	f__Aristaeellaceae	g__UBA2862	s__UBA2862 sp002350605	521.301	1579.69	1519.03	1406.63	1376.8	1470.34	3111.4	2167.18	2753.01	1765.84	3935.1	1743.02
RGMC.10451	d__Bacteria	p__Bacillota_A	c__Clostridia	o__Christensenellales	f__Aristaeellaceae	g__UBA2862	s__UBA2862 sp017432405	0	0	0	0	0	0	0	0	0	0	294.046	0
RGMC.33905	d__Bacteria	p__Bacillota_A	c__Clostridia	o__Christensenellales	f__Aristaeellaceae	g__UBA2862	s__UBA2862 sp017432405	0	0	0	0	0	0	0	0	0	0	0	0
RGMC.12034	d__Bacteria	p__Bacillota_A	c__Clostridia	o__Christensenellales	f__Aristaeellaceae	g__UBA2862	s__UBA2862 sp017434085	4833.34	15557.4	17301	9666	6088.7	14176.3	26101.4	15112.7	18648.3	9513.21	10181.4	21136.1
RGMC.14660	d__Bacteria	p__Bacillota_A	c__Clostridia	o__Christensenellales	f__Aristaeellaceae	g__UBA2862	s__UBA2862 sp017512905	0	0	0	0	0	0	0	0	0	0	0	0
RGMC.14529	d__Bacteria	p__Bacillota_A	c__Clostridia	o__Christensenellales	f__Aristaeellaceae	g__UBA2862	s__UBA2862 sp017512905	0	0	0	0	0	0	0	0	0	0	0	0
RGMC.32060	d__Bacteria	p__Bacillota_A	c__Clostridia	o__Christensenellales	f__Aristaeellaceae	g__UBA2862	s__UBA2862 sp017512905	0	0	0	0	0	0	0	0	0	0	0	0
RGMC.23649	d__Bacteria	p__Bacillota_A	c__Clostridia	o__Christensenellales	f__Aristaeellaceae	g__UBA2862	s__UBA2862 sp017537105	765.401	633.637	699.576	437.108	446.137	477.43	0	0	296.372	0	256.759	346.336
RGMC.14486	d__Bacteria	p__Bacillota_A	c__Clostridia	o__Christensenellales	f__Aristaeellaceae	g__UBA2862	s__UBA2862 sp017537105	423.075	334.92	357.482	245.088	244.358	264.618	0	0	0	0	163.444	183.531
RGMC.2007	d__Bacteria	p__Bacillota_A	c__Clostridia	o__Christensenellales	f__Aristaeellaceae	g__UBA2862	s__UBA2862 sp900317565	1411.93	2479.7	2901.7	1770.18	1358.8	2104.3	2179.74	2004.86	1638.72	0	1215.74	1585.11
RGMC.1019	d__Bacteria	p__Bacillota_A	c__Clostridia	o__Christensenellales	f__Aristaeellaceae	g__UBA2862	s__UBA2862 sp900318045	0	0	0	0	0	0	0	0	0	0	0	0
RGMC.20007	d__Bacteria	p__Bacillota_A	c__Clostridia	o__Christensenellales	f__Aristaeellaceae	g__UBA2862	s__UBA2862 sp900318045	0	0	0	0	0	0	0	0	0	0	0	0
RGMC.32091	d__Bacteria	p__Bacillota_A	c__Clostridia	o__Christensenellales	f__Aristaeellaceae	g__UBA2862	s__UBA2862 sp902765305	0	0	0	0	0	0	1943.4	0	1481.37	0	830.251	0
RGMC.21966	d__Bacteria	p__Bacillota_A	c__Clostridia	o__Christensenellales	f__Aristaeellaceae	g__UBA2862	s__UBA2862 sp902765305	0	0	0	0	0	0	1776.89	0	1389.69	0	800.673	0
RGMC.13543	d__Bacteria	p__Bacillota_A	c__Clostridia	o__Christensenellales	f__Aristaeellaceae	g__UBA2862	s__UBA2862 sp902765305	0	0	0	0	0	0	937.967	0	754.303	0	497.189	0
RGMC.31994	d__Bacteria	p__Bacillota_A	c__Clostridia	o__Christensenellales	f__Aristaeellaceae	g__UBA2862	s__UBA2862 sp902765305	0	0	0	0	0	0	184.158	0	179.223	0	179.849	0
RGMC.19297	d__Bacteria	p__Bacillota_A	c__Clostridia	o__Christensenellales	f__Aristaeellaceae	g__UBA2862	s__UBA2862 sp902777335	828.977	2572.5	3378.86	1668.49	1211.12	2382.05	1243.74	2244.43	576.177	816.271	309.089	1083.23
RGMC.29530	d__Bacteria	p__Bacillota_A	c__Clostridia	o__Christensenellales	f__Aristaeellaceae	g__UBA2862	s__UBA2862 sp902777335	854.973	2674.14	3494.45	1778.86	1248.45	2550.88	1287.91	2493.25	0	813.309	0	1058.66
RGMC.29513	d__Bacteria	p__Bacillota_A	c__Clostridia	o__Christensenellales	f__Aristaeellaceae	g__UBA2862	s__UBA2862 sp902777335	693.498	2066.61	2677.79	1517.93	1302.34	1928.64	958.149	1871.38	0	692.271	0	869.835
RGMC.20557	d__Bacteria	p__Bacillota_A	c__Clostridia	o__Christensenellales	f__Aristaeellaceae	g__UBA2862	s__UBA2862 sp902790525	0	6398.28	7216.96	4435.43	2582.77	6142.13	11482.5	5910.64	8423.9	3872.05	4706.85	8993.95
RGMC.38129	d__Bacteria	p__Bacillota_A	c__Clostridia	o__Christensenellales	f__Aristaeellaceae	g__UBA2862	s__UBA2862 sp902790525	0	2805.03	3276.45	1895.86	1150.81	2695.66	5068.8	2762.32	3767.19	1709.12	2134.89	3954.96
RGMC.21510	d__Bacteria	p__Bacillota_A	c__Clostridia	o__Christensenellales	f__Aristaeellaceae	g__UBA2862	s__UBA2862 sp902801165	0	525.704	0	0	0	0	0	0	0	0	0	0
RGMC.11127	d__Bacteria	p__Bacillota_A	c__Clostridia	o__Christensenellales	f__Aristaeellaceae	g__UBA2943	s__	0	0	0	0	0	0	0	0	0	0	0	0
RGMC.10967	d__Bacteria	p__Bacillota_A	c__Clostridia	o__Christensenellales	f__Aristaeellaceae	g__UBA2943	s__UBA2943 sp900321295	398.092	329.974	358.172	275.082	301.813	284.215	0	208.099	155.788	192.362	155.403	190.018
RGMC.39098	d__Bacteria	p__Bacillota_A	c__Clostridia	o__Christensenellales	f__Aristaeellaceae	g__UBA4246	s__	1703.63	1632.38	1974	0	0	1405.33	1219.49	1168.74	1339.14	862.067	1016.92	1437.2
RGMC.29402	d__Bacteria	p__Bacillota_A	c__Clostridia	o__Christensenellales	f__Aristaeellaceae	g__Ventricola	s__Ventricola sp017458865	0	263.977	0	214.389	187.327	224.831	1179.95	652.419	1336.02	591.395	1698.64	523.612
RGMC.13895	d__Bacteria	p__Bacillota_A	c__Clostridia	o__Christensenellales	f__Aristaeellaceae	g__Ventricola	s__Ventricola sp017484085	0	0	0	0	0	0	0	0	0	0	321.143	0
RGMC.29226	d__Bacteria	p__Bacillota_A	c__Clostridia	o__Christensenellales	f__CAG-1252	g__CAG-1252	s__CAG-1252 sp002308575	0	0	0	0	0	96.5153	167.307	140.112	111.013	209.666	136.503	115.139
RGMC.27478	d__Bacteria	p__Bacillota_A	c__Clostridia	o__Christensenellales	f__CAG-138	g__RUG472	s__	735.288	1141.33	1097.05	1014.72	1115.82	983.652	562.521	925.903	391.167	724.176	353.76	671.4
RGMC.29938	d__Bacteria	p__Bacillota_A	c__Clostridia	o__Christensenellales	f__CAG-138	g__UBA3792	s__UBA3792 sp017428025	0	244.757	277.64	216.806	222.02	214.237	0	179.176	140.683	155.525	147.791	173.187
RGMC.38764	d__Bacteria	p__Bacillota_A	c__Clostridia	o__Christensenellales	f__CAG-138	g__UBA3792	s__UBA3792 sp017428025	145.795	164.989	175.96	169.281	179.551	154.709	102.588	131.939	100.052	124.984	122.571	118.54
RGMC.39120	d__Bacteria	p__Bacillota_A	c__Clostridia	o__Christensenellales	f__CAG-138	g__UBA3792	s__UBA3792 sp017428025	143.586	158.609	173.599	156.959	178.09	147.208	0	140.536	117.122	130.729	128.635	131.624
RGMC.14487	d__Bacteria	p__Bacillota_A	c__Clostridia	o__Christensenellales	f__CAG-138	g__UBA3792	s__UBA3792 sp017428025	0	227.634	260.6	201.16	204.853	201.428	0	0	0	149	138.332	166.194
RGMC.12275	d__Bacteria	p__Bacillota_A	c__Clostridia	o__Christensenellales	f__CAG-138	g__UBA3792	s__UBA3792 sp017428025	0	210.62	230.781	196.685	205.062	191.362	0	0	0	150.38	136.973	160.598
RGMC.12203	d__Bacteria	p__Bacillota_A	c__Clostridia	o__Christensenellales	f__CAG-138	g__UBA3792	s__UBA3792 sp017428025	0	137.703	147.694	132.525	145.724	123.757	0	0	0	0	102.445	103.645
RGMC.38596	d__Bacteria	p__Bacillota_A	c__Clostridia	o__Christensenellales	f__CAG-917	g__RGIG8124	s__	0	0	0	136.745	141.13	117.577	0	0	0	162.064	0	0
RGMC.25592	d__Bacteria	p__Bacillota_A	c__Clostridia	o__Christensenellales	f__CAG-917	g__RGIG8124	s__	0	0	0	0	0	139.393	0	0	0	173.967	0	0
RGMC.38361	d__Bacteria	p__Bacillota_A	c__Clostridia	o__Christensenellales	f__CAG-917	g__RGIG8124	s__	0	0	0	0	0	0	0	0	0	0	0	0
RGMC.38519	d__Bacteria	p__Bacillota_A	c__Clostridia	o__Christensenellales	f__CAG-917	g__RGIG8124	s__	0	0	0	0	0	0	0	0	0	0	0	0
RGMC.12005	d__Bacteria	p__Bacillota_A	c__Clostridia	o__Christensenellales	f__Christensenellaceae	g__	s__	740.144	651.251	671.053	645.39	741.399	600.663	448.01	477.66	488.661	532.176	563.807	535.838
RGMC.15265	d__Bacteria	p__Bacillota_A	c__Clostridia	o__Christensenellales	f__Christensenellaceae	g__QANA01	s__QANA01 sp017439085	422.026	491.703	522.806	608.174	615.092	517.64	531.086	589.116	560.607	791.276	796.104	573.123
RGMC.11033	d__Bacteria	p__Bacillota_A	c__Clostridia	o__Christensenellales	f__Christensenellaceae	g__QANA01	s__QANA01 sp017439085	416.956	453.061	503.754	540.315	573.58	484.159	458.231	503.991	474.7	661.374	661.533	507.721
RGMC.12325	d__Bacteria	p__Bacillota_A	c__Clostridia	o__Christensenellales	f__Christensenellaceae	g__QANA01	s__QANA01 sp017439085	387.864	435.509	469.072	503.146	510.226	456.722	444.98	466.466	462.528	600.216	621.783	492.128
RGMC.3836	d__Bacteria	p__Bacillota_A	c__Clostridia	o__Christensenellales	f__Christensenellaceae	g__QANA01	s__QANA01 sp017439085	373.058	408.656	459.022	493.37	512.022	438.012	426.294	472.565	430.066	627.885	624.581	469.922
RGMC.3935	d__Bacteria	p__Bacillota_A	c__Clostridia	o__Christensenellales	f__Christensenellaceae	g__QANA01	s__QANA01 sp017439085	336.797	394.838	435.39	491.468	500.175	431.709	431.768	457.143	423.924	616.917	605.432	486.294
RGMC.53	d__Bacteria	p__Bacillota_A	c__Clostridia	o__Christensenellales	f__Christensenellaceae	g__QANA01	s__QANA01 sp017439085	275.993	349.397	378.315	468.588	522.45	361.552	340.895	392.636	376.751	550.481	582.53	415.622
RGMC.15224	d__Bacteria	p__Bacillota_A	c__Clostridia	o__Christensenellales	f__Christensenellaceae	g__QANA01	s__QANA01 sp017439085	299.751	342.321	359.759	412.896	415.441	358.507	346.714	380.577	351.544	510.008	504.021	392.593
RGMC.15400	d__Bacteria	p__Bacillota_A	c__Clostridia	o__Christensenellales	f__Christensenellaceae	g__QANA01	s__QANA01 sp017439085	308.509	344.565	373.573	433.457	412.748	367.006	343.568	378.416	349.381	462.738	451.665	390.245
RGMC.12191	d__Bacteria	p__Bacillota_A	c__Clostridia	o__Christensenellales	f__Christensenellaceae	g__QANA01	s__QANA01 sp017439085	279.57	307.613	346.286	368.859	382.222	327.496	338.132	349.754	322.665	460.593	444.147	355.178
RGMC.37590	d__Bacteria	p__Bacillota_A	c__Clostridia	o__Christensenellales	f__Christensenellaceae	g__QANA01	s__QANA01 sp017439085	285.915	312.743	349.162	379.76	380.393	336.487	324.476	347.29	334.248	446.126	439.416	361.221
RGMC.27271	d__Bacteria	p__Bacillota_A	c__Clostridia	o__Christensenellales	f__Christensenellaceae	g__QANA01	s__QANA01 sp017439085	268.721	292.81	327.742	335.641	332.596	317.848	321.937	343.175	315.904	419.198	417.892	344.218
RGMC.12299	d__Bacteria	p__Bacillota_A	c__Clostridia	o__Christensenellales	f__Christensenellaceae	g__QANA01	s__QANA01 sp017439085	284.095	313.841	342.82	341.754	345.307	323.638	316.815	326.982	315.004	411.021	408.511	327.428
RGMC.27363	d__Bacteria	p__Bacillota_A	c__Clostridia	o__Christensenellales	f__Christensenellaceae	g__QANA01	s__QANA01 sp017439085	240.28	264.949	297.82	307.428	300.767	285.275	293.293	300.042	288.182	385.239	372.068	310.482
RGMC.26996	d__Bacteria	p__Bacillota_A	c__Clostridia	o__Christensenellales	f__Christensenellaceae	g__QANA01	s__QANA01 sp017439085	0	313.704	338.521	360.148	345.576	321.395	292.281	314.507	296.314	392.67	377.691	326.641
RGMC.14852	d__Bacteria	p__Bacillota_A	c__Clostridia	o__Christensenellales	f__Christensenellaceae	g__SIG371	s__SIG371 sp017523755	714.886	584.862	619.961	551.666	599.214	515.566	287.093	331.218	163.971	461.435	154.349	369.636
RGMC.22138	d__Bacteria	p__Bacillota_A	c__Clostridia	o__Christensenellales	f__DTU072	g__CAG-1782	s__CAG-1782 sp902766325	0	0	0	0	0	0	80.2069	0	0	0	89.2739	0
RGMC.29051	d__Bacteria	p__Bacillota_A	c__Clostridia	o__Christensenellales	f__DTU072	g__CAG-1782	s__CAG-1782 sp902766325	0	0	0	0	0	0	0	0	0	0	106.083	0
RGMC.39696	d__Bacteria	p__Bacillota_A	c__Clostridia	o__Christensenellales	f__DTU072	g__CAG-1782	s__CAG-1782 sp946621465	0	0	0	0	0	0	0	0	0	96.1613	0	0
RGMC.27803	d__Bacteria	p__Bacillota_A	c__Clostridia	o__Christensenellales	f__DTU072	g__CAG-1782	s__CAG-1782 sp946621465	0	0	0	0	0	0	0	0	0	0	0	0
RGMC.12138	d__Bacteria	p__Bacillota_A	c__Clostridia	o__Christensenellales	f__Maliibacteriaceae	g__RGIG9107	s__RGIG9107 sp017431145	311.234	273.947	287.919	235.439	249.035	223.618	0	0	204.138	0	212.833	207.461
RGMC.14630	d__Bacteria	p__Bacillota_A	c__Clostridia	o__Christensenellales	f__Maliibacteriaceae	g__RGIG9107	s__RGIG9107 sp017431145	272.752	256.898	245.847	240.364	266.792	217.283	0	0	182.783	0	214.83	155.624
RGMC.20426	d__Bacteria	p__Bacillota_A	c__Clostridia	o__Clostridiales	f__Clostridiaceae	g__Clostridium_T	s__Clostridium_T intestinale	0	0	0	0	0	0	0	0	0	0	456.117	0
RGMC.795	d__Bacteria	p__Bacillota_A	c__Clostridia	o__Eubacteriales	f__Anaerofustaceae	g__JAAYHF01	s__JAAYHF01 sp024685545	543.46	329.35	355.194	333.619	302.354	282.829	0	124.767	92.3307	108.676	97.8396	119.998
RGMC.14599	d__Bacteria	p__Bacillota_A	c__Clostridia	o__Eubacteriales	f__Anaerofustaceae	g__RUG14186	s__RUG14186 sp902796565	0	0	0	0	0	0	0	0	0	0	120.472	0
RGMC.518	d__Bacteria	p__Bacillota_A	c__Clostridia	o__Eubacteriales	f__Anaerofustaceae	g__RUG14186	s__RUG14186 sp902796565	0	0	0	0	0	0	0	0	0	0	0	0
RGMC.14500	d__Bacteria	p__Bacillota_A	c__Clostridia	o__Eubacteriales	f__Anaerofustaceae	g__RUG14186	s__RUG14186 sp902796565	0	0	0	0	0	0	0	0	0	0	0	0
RGMC.17360	d__Bacteria	p__Bacillota_A	c__Clostridia	o__Eubacteriales	f__Anaerofustaceae	g__RUG14186	s__RUG14186 sp902796565	0	0	0	0	0	0	0	0	0	0	0	0
RGMC.22079	d__Bacteria	p__Bacillota_A	c__Clostridia	o__Eubacteriales	f__Eubacteriaceae	g__Eubacterium	s__Eubacterium callanderi	0	0	0	0	0	0	1756.65	0	3186.3	0	4519.94	0
RGMC.22105	d__Bacteria	p__Bacillota_A	c__Clostridia	o__Eubacteriales	f__Eubacteriaceae	g__Eubacterium	s__Eubacterium maltosivorans	0	0	0	0	0	0	0	0	0	0	0	0
RGMC.10525	d__Bacteria	p__Bacillota_A	c__Clostridia	o__Eubacteriales	f__Eubacteriaceae	g__Eubacterium	s__Eubacterium maltosivorans	0	0	0	0	0	0	0	0	0	0	0	0
RGMC.12371	d__Bacteria	p__Bacillota_A	c__Clostridia	o__Lachnospirales	f__Anaerotignaceae	g__RGIG5631	s__RGIG5631 sp017534115	373.447	269.483	0	344.795	381.664	311.674	0	0	0	0	0	0
RGMC.12848	d__Bacteria	p__Bacillota_A	c__Clostridia	o__Lachnospirales	f__Anaerotignaceae	g__RGIG5631	s__RGIG5631 sp017534115	0	0	0	0	0	262.396	0	0	0	0	0	0
RGMC.12429	d__Bacteria	p__Bacillota_A	c__Clostridia	o__Lachnospirales	f__Bianqueaceae	g__RUG12817	s__RUG12817 sp017442535	0	122.966	0	109.309	0	96.2313	0	0	116.788	0	113.713	117.431
RGMC.19903	d__Bacteria	p__Bacillota_A	c__Clostridia	o__Lachnospirales	f__Bianqueaceae	g__RUG159	s__RUG159 sp017474705	0	763.627	888.121	571.938	500.434	707.547	0	0	549.149	0	375.877	635.718
RGMC.14174	d__Bacteria	p__Bacillota_A	c__Clostridia	o__Lachnospirales	f__Bianqueaceae	g__RUG159	s__RUG159 sp017474705	0	178.377	179.941	176.651	192.88	152.966	0	0	0	0	195.128	0
RGMC.21748	d__Bacteria	p__Bacillota_A	c__Clostridia	o__Lachnospirales	f__Lachnospiraceae	g__AC2028	s__	0	0	0	0	0	0	509.767	516.705	537.101	370.284	526.926	294.427
RGMC.1513	d__Bacteria	p__Bacillota_A	c__Clostridia	o__Lachnospirales	f__Lachnospiraceae	g__AC2028	s__	0	0	0	0	0	0	391.574	317.077	440.589	277.466	455.858	0
RGMC.5088	d__Bacteria	p__Bacillota_A	c__Clostridia	o__Lachnospirales	f__Lachnospiraceae	g__AC2028	s__	0	0	0	0	0	0	0	0	0	0	280.998	0
RGMC.22287	d__Bacteria	p__Bacillota_A	c__Clostridia	o__Lachnospirales	f__Lachnospiraceae	g__AC2028	s__AC2028 sp000702685	431.017	0	0	0	0	293.009	876.979	838.208	1099.67	834.571	1219.79	623.813
RGMC.10789	d__Bacteria	p__Bacillota_A	c__Clostridia	o__Lachnospirales	f__Lachnospiraceae	g__AC2028	s__AC2028 sp000702685	422.188	267.738	277.879	195.525	197.283	271.517	704.415	644.273	818.775	565.553	770.462	548.412
RGMC.16815	d__Bacteria	p__Bacillota_A	c__Clostridia	o__Lachnospirales	f__Lachnospiraceae	g__AC2028	s__AC2028 sp017940415	982.706	661.977	756.972	554.937	504.706	632.589	2020.05	1875.89	1976.27	1359.43	1729.22	1135.69
RGMC.20893	d__Bacteria	p__Bacillota_A	c__Clostridia	o__Lachnospirales	f__Lachnospiraceae	g__AC2028	s__AC2028 sp902794095	0	383.507	471.811	435.799	343.938	533.665	3634.3	2192.55	3340.98	1860.81	2575.93	1887.12
RGMC.12292	d__Bacteria	p__Bacillota_A	c__Clostridia	o__Lachnospirales	f__Lachnospiraceae	g__Acetatifactor	s__Acetatifactor sp016290775	1630.91	948.476	1351.46	1346.74	1073.81	1602.1	2726.17	1758.82	1785.65	2190.85	1476.68	2246.75
RGMC.225	d__Bacteria	p__Bacillota_A	c__Clostridia	o__Lachnospirales	f__Lachnospiraceae	g__Acetatifactor	s__Acetatifactor sp016290775	840.07	490.799	586.076	515.511	523.099	548.983	858.562	715.204	673.906	772.552	662.149	741.855
RGMC.14748	d__Bacteria	p__Bacillota_A	c__Clostridia	o__Lachnospirales	f__Lachnospiraceae	g__Acetatifactor	s__Acetatifactor sp016290775	741.405	439.101	486.993	421.158	436.177	410.253	663.938	592.885	515.787	581.748	519.579	518.414
RGMC.14667	d__Bacteria	p__Bacillota_A	c__Clostridia	o__Lachnospirales	f__Lachnospiraceae	g__Alectryocaccobium	s__Alectryocaccobium sp017433825	0	0	0	0	0	0	0	0	0	0	0	0
RGMC.14710	d__Bacteria	p__Bacillota_A	c__Clostridia	o__Lachnospirales	f__Lachnospiraceae	g__Alectryocaccobium	s__Alectryocaccobium sp017509985	334.069	314.355	308.532	267.209	273.53	253.846	214.977	228.074	229.906	199.017	245.462	280.4
RGMC.12014	d__Bacteria	p__Bacillota_A	c__Clostridia	o__Lachnospirales	f__Lachnospiraceae	g__Anaerobutyricum	s__	2887.95	4889.24	5557.43	4112.94	4191.17	4839.89	3651.07	3782.49	4788.45	2920.89	5321.32	4266.91
RGMC.21088	d__Bacteria	p__Bacillota_A	c__Clostridia	o__Lachnospirales	f__Lachnospiraceae	g__Anaerobutyricum	s__Anaerobutyricum sp902796415	1719.87	3714.68	4362.34	2748.32	1857.82	3867.5	2933.53	2549.03	2926.05	1465.16	1952.06	2720.89
RGMC.28349	d__Bacteria	p__Bacillota_A	c__Clostridia	o__Lachnospirales	f__Lachnospiraceae	g__Anaerobutyricum	s__Anaerobutyricum sp946538445	0	0	0	0	0	0	0	0	0	0	0	0
RGMC.29875	d__Bacteria	p__Bacillota_A	c__Clostridia	o__Lachnospirales	f__Lachnospiraceae	g__Anaerostipes	s__	0	0	0	0	0	0	0	0	2147.33	0	0	2003.84
RGMC.10965	d__Bacteria	p__Bacillota_A	c__Clostridia	o__Lachnospirales	f__Lachnospiraceae	g__Avilachnospira	s__	0	0	0	0	0	300.788	0	0	270.815	0	277.054	313.112
RGMC.14271	d__Bacteria	p__Bacillota_A	c__Clostridia	o__Lachnospirales	f__Lachnospiraceae	g__Avilachnospira	s__Avilachnospira sp017388745	0	0	0	0	0	0	0	0	246.791	0	259.029	0
RGMC.10895	d__Bacteria	p__Bacillota_A	c__Clostridia	o__Lachnospirales	f__Lachnospiraceae	g__Bilifractor	s__Bilifractor sp000702845	17859.9	14140.4	15350.7	12422.2	11793.4	12144.8	8526.41	11843.5	9663.94	8186.45	8456.77	10328.7
RGMC.769	d__Bacteria	p__Bacillota_A	c__Clostridia	o__Lachnospirales	f__Lachnospiraceae	g__Bilifractor	s__Bilifractor sp024683035	1197.83	716.252	799.01	633.999	589.179	658.472	350.019	0	385.687	0	386.757	503.139
RGMC.14157	d__Bacteria	p__Bacillota_A	c__Clostridia	o__Lachnospirales	f__Lachnospiraceae	g__Blautia_A	s__Blautia_A sp017420455	0	1088.67	1486	0	0	1201.77	2714.55	2661.5	3228.28	1647.16	2556.17	2134.02
RGMC.2271	d__Bacteria	p__Bacillota_A	c__Clostridia	o__Lachnospirales	f__Lachnospiraceae	g__Butyrivibrio	s__	0	940.601	0	0	0	0	0	0	0	0	0	0
RGMC.22053	d__Bacteria	p__Bacillota_A	c__Clostridia	o__Lachnospirales	f__Lachnospiraceae	g__Butyrivibrio	s__Butyrivibrio sp000421405	0	1687.66	0	2277.33	0	2521.49	3969.44	3701.23	3040.35	3194.98	2625.7	0
RGMC.22010	d__Bacteria	p__Bacillota_A	c__Clostridia	o__Lachnospirales	f__Lachnospiraceae	g__Butyrivibrio	s__Butyrivibrio sp000421405	0	1644.85	1983.29	1949.15	0	2187.95	3459.89	3281.68	2558.95	2545.63	1959.1	2604.84
RGMC.22040	d__Bacteria	p__Bacillota_A	c__Clostridia	o__Lachnospirales	f__Lachnospiraceae	g__Butyrivibrio	s__Butyrivibrio sp000421405	0	1365.35	0	1723.62	0	1934.71	3137.22	2918.34	2299.85	2357.54	1789.02	2326.66
RGMC.18064	d__Bacteria	p__Bacillota_A	c__Clostridia	o__Lachnospirales	f__Lachnospiraceae	g__Butyrivibrio	s__Butyrivibrio sp015056625	0	0	0	0	0	0	0	0	0	0	0	0
RGMC.2349	d__Bacteria	p__Bacillota_A	c__Clostridia	o__Lachnospirales	f__Lachnospiraceae	g__Butyrivibrio	s__Butyrivibrio sp016291375	2876.48	2160.04	2142.48	1909.6	2092.72	2535.52	2297.16	2610.71	2194.79	2875.12	2216.17	2668.75
RGMC.247	d__Bacteria	p__Bacillota_A	c__Clostridia	o__Lachnospirales	f__Lachnospiraceae	g__Butyrivibrio	s__Butyrivibrio sp016291375	2542.66	1835.35	2008.57	1402.41	1159.61	2289.46	2224.19	2411.73	1993.93	1937.91	1431.21	2751.75
RGMC.12045	d__Bacteria	p__Bacillota_A	c__Clostridia	o__Lachnospirales	f__Lachnospiraceae	g__Butyrivibrio	s__Butyrivibrio sp017433805	0	1205.61	0	0	0	0	0	0	0	0	0	0
RGMC.10716	d__Bacteria	p__Bacillota_A	c__Clostridia	o__Lachnospirales	f__Lachnospiraceae	g__Butyrivibrio	s__Butyrivibrio sp017445665	0	0	0	0	0	0	0	0	0	0	0	0
RGMC.17103	d__Bacteria	p__Bacillota_A	c__Clostridia	o__Lachnospirales	f__Lachnospiraceae	g__Butyrivibrio	s__Butyrivibrio sp017634825	0	0	0	0	0	0	0	0	0	0	0	0
RGMC.16802	d__Bacteria	p__Bacillota_A	c__Clostridia	o__Lachnospirales	f__Lachnospiraceae	g__Butyrivibrio	s__Butyrivibrio sp017940685	0	0	0	0	0	0	1111.99	0	1058.83	1155.76	1120.05	0
RGMC.810	d__Bacteria	p__Bacillota_A	c__Clostridia	o__Lachnospirales	f__Lachnospiraceae	g__Butyrivibrio	s__Butyrivibrio sp024687125	577.067	567.923	797.589	699.316	528.688	744.695	1597.04	1138.03	1242.89	1358.1	977.21	1422.87
RGMC.733	d__Bacteria	p__Bacillota_A	c__Clostridia	o__Lachnospirales	f__Lachnospiraceae	g__CAG-411	s__CAG-411 sp902795895	0	627.114	0	0	0	0	212.626	0	0	0	0	0
RGMC.37900	d__Bacteria	p__Bacillota_A	c__Clostridia	o__Lachnospirales	f__Lachnospiraceae	g__CAG-411	s__CAG-411 sp902795895	0	374.343	0	0	0	0	0	0	0	0	0	0
RGMC.3482	d__Bacteria	p__Bacillota_A	c__Clostridia	o__Lachnospirales	f__Lachnospiraceae	g__CAG-411	s__CAG-411 sp902795895	0	328.264	0	0	0	0	0	0	0	0	0	0
RGMC.25894	d__Bacteria	p__Bacillota_A	c__Clostridia	o__Lachnospirales	f__Lachnospiraceae	g__CAG-411	s__CAG-411 sp902795895	0	322.813	0	0	0	0	0	0	0	0	0	0
RGMC.3520	d__Bacteria	p__Bacillota_A	c__Clostridia	o__Lachnospirales	f__Lachnospiraceae	g__CAG-411	s__CAG-411 sp902795895	0	314.707	0	0	0	0	0	0	0	0	0	0
RGMC.3920	d__Bacteria	p__Bacillota_A	c__Clostridia	o__Lachnospirales	f__Lachnospiraceae	g__CAG-411	s__CAG-411 sp902795895	0	293.847	0	0	0	0	0	0	0	0	0	0
RGMC.21045	d__Bacteria	p__Bacillota_A	c__Clostridia	o__Lachnospirales	f__Lachnospiraceae	g__CAG-411	s__CAG-411 sp902795895	0	292.712	0	0	0	0	0	0	0	0	0	0
RGMC.16742	d__Bacteria	p__Bacillota_A	c__Clostridia	o__Lachnospirales	f__Lachnospiraceae	g__CAG-411	s__CAG-411 sp902795895	0	253.331	0	0	0	0	0	0	0	0	0	0
RGMC.38214	d__Bacteria	p__Bacillota_A	c__Clostridia	o__Lachnospirales	f__Lachnospiraceae	g__CAG-791	s__	1958.39	2242.93	3763.59	3567.9	4546.78	3684.12	2291.39	2605.18	2904.64	1448.38	3256.38	2613.66
RGMC.11100	d__Bacteria	p__Bacillota_A	c__Clostridia	o__Lachnospirales	f__Lachnospiraceae	g__CAG-791	s__	0	684.902	0	0	0	825.743	0	0	893.782	0	886.045	768.324
RGMC.1162	d__Bacteria	p__Bacillota_A	c__Clostridia	o__Lachnospirales	f__Lachnospiraceae	g__CAG-791	s__	0	0	0	0	0	0	0	0	0	0	0	0
RGMC.10978	d__Bacteria	p__Bacillota_A	c__Clostridia	o__Lachnospirales	f__Lachnospiraceae	g__CAG-791	s__CAG-791 sp002449595	0	0	0	0	0	0	0	0	0	0	313.418	0
RGMC.2990	d__Bacteria	p__Bacillota_A	c__Clostridia	o__Lachnospirales	f__Lachnospiraceae	g__CAG-791	s__CAG-791 sp002449595	0	0	0	0	0	0	0	0	0	0	138.877	0
RGMC.28304	d__Bacteria	p__Bacillota_A	c__Clostridia	o__Lachnospirales	f__Lachnospiraceae	g__CAG-791	s__CAG-791 sp002449595	0	0	0	0	0	0	0	0	0	0	132.789	0
RGMC.14184	d__Bacteria	p__Bacillota_A	c__Clostridia	o__Lachnospirales	f__Lachnospiraceae	g__CAG-791	s__CAG-791 sp017474455	0	0	0	0	0	0	0	0	260.931	0	226.67	0
RGMC.10446	d__Bacteria	p__Bacillota_A	c__Clostridia	o__Lachnospirales	f__Lachnospiraceae	g__CAG-791	s__CAG-791 sp030525515	0	0	0	0	0	0	0	0	0	0	0	0
RGMC.2553	d__Bacteria	p__Bacillota_A	c__Clostridia	o__Lachnospirales	f__Lachnospiraceae	g__CAG-791	s__CAG-791 sp030525515	0	0	0	0	0	0	0	0	0	0	0	0
RGMC.19596	d__Bacteria	p__Bacillota_A	c__Clostridia	o__Lachnospirales	f__Lachnospiraceae	g__CAG-791	s__CAG-791 sp902780385	1247.81	3645.68	3839.75	3030.17	3271.09	3438.23	3193.33	3403.49	3905.9	3222.02	4661.65	3434.6
RGMC.29224	d__Bacteria	p__Bacillota_A	c__Clostridia	o__Lachnospirales	f__Lachnospiraceae	g__CAG-791	s__CAG-791 sp946410365	0	0	0	0	0	0	0	0	0	0	0	0
RGMC.27877	d__Bacteria	p__Bacillota_A	c__Clostridia	o__Lachnospirales	f__Lachnospiraceae	g__CAG-791	s__CAG-791 sp946629175	2803.18	3267.88	6874.85	7549.04	8712.38	7787.93	3007.73	4919.65	4364.72	1819.2	4311.79	4898.87
RGMC.1655	d__Bacteria	p__Bacillota_A	c__Clostridia	o__Lachnospirales	f__Lachnospiraceae	g__CAMNLO01	s__	0	1027.84	0	1068.15	0	0	0	0	0	0	0	1049.07
RGMC.27920	d__Bacteria	p__Bacillota_A	c__Clostridia	o__Lachnospirales	f__Lachnospiraceae	g__CAMNLO01	s__CAMNLO01 sp946621895	714.803	577.863	627.097	516.217	396.997	501.425	0	0	0	0	333.884	569.884
RGMC.12150	d__Bacteria	p__Bacillota_A	c__Clostridia	o__Lachnospirales	f__Lachnospiraceae	g__Chordicoccus	s__Chordicoccus sp002308255	0	1544.47	1590.24	1128.62	943.653	1457.09	1791.01	1375.92	2301.02	1127.73	1776.21	1703.02
RGMC.17353	d__Bacteria	p__Bacillota_A	c__Clostridia	o__Lachnospirales	f__Lachnospiraceae	g__Eubacterium_F	s__Eubacterium_F sp017445525	0	0	0	0	0	0	0	0	0	0	0	0
RGMC.12366	d__Bacteria	p__Bacillota_A	c__Clostridia	o__Lachnospirales	f__Lachnospiraceae	g__Eubacterium_F	s__Eubacterium_F sp017445525	0	0	0	0	0	0	0	0	0	0	0	0
RGMC.2025	d__Bacteria	p__Bacillota_A	c__Clostridia	o__Lachnospirales	f__Lachnospiraceae	g__Eubacterium_Q	s__	425.818	774.112	807.183	477.089	438.022	582.038	2963.38	2552.03	4893	2236.33	5765.4	1644.05
RGMC.15433	d__Bacteria	p__Bacillota_A	c__Clostridia	o__Lachnospirales	f__Lachnospiraceae	g__Eubacterium_Q	s__Eubacterium_Q sp900321215	0	0	0	0	0	0	205.542	208.939	208.021	187.672	211.16	0
RGMC.37276	d__Bacteria	p__Bacillota_A	c__Clostridia	o__Lachnospirales	f__Lachnospiraceae	g__Eubacterium_Q	s__Eubacterium_Q sp900321215	0	0	0	0	0	0	175.043	186.279	174.943	164.383	182.061	0
RGMC.23964	d__Bacteria	p__Bacillota_A	c__Clostridia	o__Lachnospirales	f__Lachnospiraceae	g__Eubacterium_Q	s__Eubacterium_Q sp900321215	0	0	0	0	0	0	0	0	246.824	212.624	231.394	0
RGMC.29426	d__Bacteria	p__Bacillota_A	c__Clostridia	o__Lachnospirales	f__Lachnospiraceae	g__Eubacterium_Q	s__Eubacterium_Q sp900321215	0	0	0	0	0	0	0	0	177.483	0	162.184	0
RGMC.28389	d__Bacteria	p__Bacillota_A	c__Clostridia	o__Lachnospirales	f__Lachnospiraceae	g__Eubacterium_Q	s__Eubacterium_Q sp900321215	0	0	0	0	0	0	0	0	152.713	0	154.179	0
RGMC.29288	d__Bacteria	p__Bacillota_A	c__Clostridia	o__Lachnospirales	f__Lachnospiraceae	g__G11	s__G11 sp900103495	290.629	277.355	294.267	353.23	344.843	362.162	804.762	721.245	696.374	646.417	708.017	505.809
RGMC.22371	d__Bacteria	p__Bacillota_A	c__Clostridia	o__Lachnospirales	f__Lachnospiraceae	g__G11	s__G11 sp900103495	266.464	235.142	256.385	308.469	309.224	314.333	713.369	652.992	658.695	608.891	695.779	464.836
RGMC.157	d__Bacteria	p__Bacillota_A	c__Clostridia	o__Lachnospirales	f__Lachnospiraceae	g__G11	s__G11 sp900103495	0	0	0	295.839	297.435	292.377	670.886	600.992	592.142	551.434	626.23	444.393
RGMC.23735	d__Bacteria	p__Bacillota_A	c__Clostridia	o__Lachnospirales	f__Lachnospiraceae	g__G11	s__G11 sp947167445	0	0	0	0	0	0	552.659	478.238	482.981	450.192	484.946	345.629
RGMC.28431	d__Bacteria	p__Bacillota_A	c__Clostridia	o__Lachnospirales	f__Lachnospiraceae	g__G11	s__G11 sp947167445	0	0	0	0	0	0	596.038	500.714	505.791	455.732	472.488	0
RGMC.18179	d__Bacteria	p__Bacillota_A	c__Clostridia	o__Lachnospirales	f__Lachnospiraceae	g__G11	s__G11 sp947167445	0	0	0	0	0	0	502.924	420.446	420.819	390.709	417.2	0
RGMC.21197	d__Bacteria	p__Bacillota_A	c__Clostridia	o__Lachnospirales	f__Lachnospiraceae	g__ISDg	s__ISDg sp902797475	4382.72	2647.09	2707.7	2671.65	2888.9	2571.79	628.027	1204.96	383.214	1021.32	343.765	755.611
RGMC.2651	d__Bacteria	p__Bacillota_A	c__Clostridia	o__Lachnospirales	f__Lachnospiraceae	g__ISDg	s__ISDg sp902797475	2902.94	1681.58	1793.77	1721.85	1797.69	1682.98	395.653	757.551	232.558	654.316	211.579	489.527
RGMC.60	d__Bacteria	p__Bacillota_A	c__Clostridia	o__Lachnospirales	f__Lachnospiraceae	g__ISDg	s__ISDg sp902797475	2505.7	1501.56	1580.25	1553.96	1626.03	1508.28	0	705.808	0	626.094	0	498.646
RGMC.2606	d__Bacteria	p__Bacillota_A	c__Clostridia	o__Lachnospirales	f__Lachnospiraceae	g__ISDg	s__ISDg sp902797475	1127.33	728.653	754.806	640.644	692.815	626.374	0	280.892	0	216.616	0	189.365
RGMC.501	d__Bacteria	p__Bacillota_A	c__Clostridia	o__Lachnospirales	f__Lachnospiraceae	g__ISDg	s__ISDg sp902797475	1186.66	686.063	709.088	632.511	661.872	618.975	0	280.53	0	0	0	0
RGMC.743	d__Bacteria	p__Bacillota_A	c__Clostridia	o__Lachnospirales	f__Lachnospiraceae	g__JAEEOQ01	s__JAEEOQ01 sp016284355	0	0	0	292.21	226.145	275.321	631.372	484.606	632.245	562.488	507.958	442.529
RGMC.6	d__Bacteria	p__Bacillota_A	c__Clostridia	o__Lachnospirales	f__Lachnospiraceae	g__JAEEOQ01	s__JAEEOQ01 sp016284355	0	0	0	218.825	211.16	181.939	373.274	350.554	430.818	489.24	457.473	277.873
RGMC.439	d__Bacteria	p__Bacillota_A	c__Clostridia	o__Lachnospirales	f__Lachnospiraceae	g__JAILNW01	s__JAILNW01 sp024691145	306.326	0	241.991	280.509	261.005	218.532	0	293.199	0	319.433	0	292.179
RGMC.2341	d__Bacteria	p__Bacillota_A	c__Clostridia	o__Lachnospirales	f__Lachnospiraceae	g__Moryella	s__	0	0	0	0	0	0	456.565	0	443.906	314.723	380.069	452.823
RGMC.8533	d__Bacteria	p__Bacillota_A	c__Clostridia	o__Lachnospirales	f__Lachnospiraceae	g__Moryella	s__Moryella sp902780465	0	1710.37	0	1470.25	0	1715.18	2823.58	2978.21	2559.8	2486.41	3175.63	2358.11
RGMC.19603	d__Bacteria	p__Bacillota_A	c__Clostridia	o__Lachnospirales	f__Lachnospiraceae	g__Moryella	s__Moryella sp902780465	0	1695.38	0	0	0	1728.96	2995.59	3306.97	2668.84	2683.36	3439.9	2381.11
RGMC.14779	d__Bacteria	p__Bacillota_A	c__Clostridia	o__Lachnospirales	f__Lachnospiraceae	g__Moryella	s__Moryella sp902780465	0	1109.57	1509.29	960.549	0	1119.08	1864.34	2004.38	1786.88	1686.3	2376.13	1630.12
RGMC.21575	d__Bacteria	p__Bacillota_A	c__Clostridia	o__Lachnospirales	f__Lachnospiraceae	g__Moryella	s__Moryella sp902780465	0	1171.76	0	0	0	0	1701.35	1731.27	1572.68	1429.33	1844.35	1538.55
RGMC.39415	d__Bacteria	p__Bacillota_A	c__Clostridia	o__Lachnospirales	f__Lachnospiraceae	g__Moryella	s__Moryella sp902780465	0	756.129	974.54	699.534	1131.11	749.281	1096.92	1244.72	1117.83	1211.33	1664.66	1008.09
RGMC.14830	d__Bacteria	p__Bacillota_A	c__Clostridia	o__Lachnospirales	f__Lachnospiraceae	g__Moryella	s__Moryella sp902780465	0	375.015	0	263.993	0	243.103	281.904	274.22	298.07	233.629	264.934	338.42
RGMC.10694	d__Bacteria	p__Bacillota_A	c__Clostridia	o__Lachnospirales	f__Lachnospiraceae	g__NK4A136	s__NK4A136 sp017437785	619.068	388.333	501.781	0	364.836	386.555	534.726	681.831	451.438	519.883	422.306	551.792
RGMC.12389	d__Bacteria	p__Bacillota_A	c__Clostridia	o__Lachnospirales	f__Lachnospiraceae	g__NK4A136	s__NK4A136 sp017437785	0	0	172.038	0	0	0	0	227.274	0	0	0	171.667
RGMC.13013	d__Bacteria	p__Bacillota_A	c__Clostridia	o__Lachnospirales	f__Lachnospiraceae	g__NK4A144	s__NK4A144 sp000621405	0	0	0	0	0	0	0	0	0	0	0	0
RGMC.22320	d__Bacteria	p__Bacillota_A	c__Clostridia	o__Lachnospirales	f__Lachnospiraceae	g__NK4A144	s__NK4A144 sp000622025	0	0	0	0	0	0	0	0	0	0	0	0
RGMC.12886	d__Bacteria	p__Bacillota_A	c__Clostridia	o__Lachnospirales	f__Lachnospiraceae	g__NK4A144	s__NK4A144 sp017444545	0	0	0	0	0	0	0	0	0	0	0	0
RGMC.19504	d__Bacteria	p__Bacillota_A	c__Clostridia	o__Lachnospirales	f__Lachnospiraceae	g__NK4A144	s__NK4A144 sp902779445	0	0	0	0	0	0	0	0	0	0	0	0
RGMC.17800	d__Bacteria	p__Bacillota_A	c__Clostridia	o__Lachnospirales	f__Lachnospiraceae	g__Oribacterium	s__Oribacterium sp002371295	0	2103.02	0	0	0	0	3924.35	5191.25	4587.43	2606.79	2336.03	3416.02
RGMC.2995	d__Bacteria	p__Bacillota_A	c__Clostridia	o__Lachnospirales	f__Lachnospiraceae	g__Oribacterium	s__Oribacterium sp002371295	0	738.584	0	0	0	0	1193.31	1686.16	1301.51	729.48	590.265	1024.29
RGMC.5498	d__Bacteria	p__Bacillota_A	c__Clostridia	o__Lachnospirales	f__Lachnospiraceae	g__Oribacterium	s__Oribacterium sp002371295	0	666.193	0	0	0	0	1112.16	1485.18	1357.09	793.849	711.632	914.813
RGMC.10990	d__Bacteria	p__Bacillota_A	c__Clostridia	o__Lachnospirales	f__Lachnospiraceae	g__Porcincola	s__	2012.4	1398.09	1808.95	1177.99	999.44	1549.63	0	952.864	0	522.714	0	918.694
RGMC.19702	d__Bacteria	p__Bacillota_A	c__Clostridia	o__Lachnospirales	f__Lachnospiraceae	g__Porcincola	s__Porcincola sp902781455	544.379	999.607	1168.66	1044.34	978.06	1051.54	684.569	693.434	545.365	610.92	697.256	1008.86
RGMC.10484	d__Bacteria	p__Bacillota_A	c__Clostridia	o__Lachnospirales	f__Lachnospiraceae	g__Porcincola	s__Porcincola sp902781455	439.865	802.919	923.217	846.933	800.294	826.902	542.596	557.419	440.519	492.289	573.458	751.948
RGMC.2342	d__Bacteria	p__Bacillota_A	c__Clostridia	o__Lachnospirales	f__Lachnospiraceae	g__Porcincola	s__Porcincola sp902801515	1935.47	1471.89	1657.9	1239.72	1360.05	1340.51	1399.65	1224.72	1396.26	1145.79	1817.1	1470.11
RGMC.21536	d__Bacteria	p__Bacillota_A	c__Clostridia	o__Lachnospirales	f__Lachnospiraceae	g__Porcincola	s__Porcincola sp902801515	1675.88	1311.25	1474.74	1105.77	1245.54	1208.67	1246.33	1089.31	1245.68	1039.42	1691.93	1309.74
RGMC.39735	d__Bacteria	p__Bacillota_A	c__Clostridia	o__Lachnospirales	f__Lachnospiraceae	g__Pseudobutyrivibrio	s__	0	2655.32	1618.71	1144.07	703.87	1040.71	1775.4	1993.85	1275.45	1317.59	903.636	1146.79
RGMC.10918	d__Bacteria	p__Bacillota_A	c__Clostridia	o__Lachnospirales	f__Lachnospiraceae	g__Pseudobutyrivibrio	s__	0	1492.4	0	0	0	0	1964.59	1389.78	1605.1	836.904	872.808	1285.91
RGMC.19680	d__Bacteria	p__Bacillota_A	c__Clostridia	o__Lachnospirales	f__Lachnospiraceae	g__Pseudobutyrivibrio	s__Pseudobutyrivibrio ruminis_C	0	2577.01	0	0	0	0	0	0	0	0	0	0
RGMC.19835	d__Bacteria	p__Bacillota_A	c__Clostridia	o__Lachnospirales	f__Lachnospiraceae	g__Pseudobutyrivibrio	s__Pseudobutyrivibrio ruminis_C	0	753.335	0	0	0	0	0	0	0	0	0	0
RGMC.19731	d__Bacteria	p__Bacillota_A	c__Clostridia	o__Lachnospirales	f__Lachnospiraceae	g__Pseudobutyrivibrio	s__Pseudobutyrivibrio sp900107545	0	2074.07	2063.19	1561.24	0	1578.9	5363.28	3321.84	3349.63	2176.82	1738.03	2430.84
RGMC.15530	d__Bacteria	p__Bacillota_A	c__Clostridia	o__Lachnospirales	f__Lachnospiraceae	g__RGIG3528	s__RGIG3528 sp016283775	0	0	0	330.182	218.254	281.649	0	246.669	0	261.43	0	276.304
RGMC.345	d__Bacteria	p__Bacillota_A	c__Clostridia	o__Lachnospirales	f__Lachnospiraceae	g__RGIG3528	s__RGIG3528 sp016283775	0	0	0	307.266	0	217.753	0	0	0	237.981	0	200.703
RGMC.1770	d__Bacteria	p__Bacillota_A	c__Clostridia	o__Lachnospirales	f__Lachnospiraceae	g__RGIG3528	s__RGIG3528 sp016283775	0	0	0	181.015	0	134.831	0	0	0	0	0	0
RGMC.140	d__Bacteria	p__Bacillota_A	c__Clostridia	o__Lachnospirales	f__Lachnospiraceae	g__RGIG3528	s__RGIG3528 sp016287675	0	0	0	184.598	0	197.224	233.96	196.528	220.05	229.235	202.125	176.348
RGMC.12881	d__Bacteria	p__Bacillota_A	c__Clostridia	o__Lachnospirales	f__Lachnospiraceae	g__RGIG3528	s__RGIG3528 sp017444675	323.882	273.273	284.323	517.546	558.508	499.729	458.567	479.493	478.755	675.61	595.174	376.025
RGMC.3857	d__Bacteria	p__Bacillota_A	c__Clostridia	o__Lachnospirales	f__Lachnospiraceae	g__RGIG5021	s__	189.172	0	0	0	0	0	0	0	0	0	0	0
RGMC.15462	d__Bacteria	p__Bacillota_A	c__Clostridia	o__Lachnospirales	f__Lachnospiraceae	g__RGIG5021	s__RGIG5021 sp017479935	332.759	1160.67	1123.08	852.356	874.079	948.809	781.901	808.201	731.39	782.545	650.443	935.89
RGMC.14062	d__Bacteria	p__Bacillota_A	c__Clostridia	o__Lachnospirales	f__Lachnospiraceae	g__RGIG5021	s__RGIG5021 sp017479935	0	388.326	388.78	303.407	312.921	330.89	279.738	282.801	275.648	283.518	264.989	317.447
RGMC.12128	d__Bacteria	p__Bacillota_A	c__Clostridia	o__Lachnospirales	f__Lachnospiraceae	g__RGIG5612	s__RGIG5612 sp017431485	0	0	0	0	0	0	0	0	1011.25	0	1176.8	1158.52
RGMC.12404	d__Bacteria	p__Bacillota_A	c__Clostridia	o__Lachnospirales	f__Lachnospiraceae	g__RGIG5612	s__RGIG5612 sp017441295	0	0	0	0	0	0	0	0	0	0	119.571	0
RGMC.14708	d__Bacteria	p__Bacillota_A	c__Clostridia	o__Lachnospirales	f__Lachnospiraceae	g__RGIG5612	s__RGIG5612 sp017510065	369.589	429.692	418.734	352.209	401.611	366.233	524.147	429.569	577.078	427.82	617.631	539.179
RGMC.29312	d__Bacteria	p__Bacillota_A	c__Clostridia	o__Lachnospirales	f__Lachnospiraceae	g__RGIG5612	s__RGIG5612 sp017511185	437.87	547.183	553.962	510.126	567.378	527.569	668.632	559.212	903.278	566.086	1146.85	653.724
RGMC.1713	d__Bacteria	p__Bacillota_A	c__Clostridia	o__Lachnospirales	f__Lachnospiraceae	g__RGIG5612	s__RGIG5612 sp017511185	412.041	495.856	494.316	506.362	647.766	482.575	595.26	509.006	839.964	569.345	1210.44	612.366
RGMC.29927	d__Bacteria	p__Bacillota_A	c__Clostridia	o__Lachnospirales	f__Lachnospiraceae	g__RGIG5612	s__RGIG5612 sp017511185	413.491	477.015	495.469	464.188	555.992	460.634	595.027	500.518	801.246	524.583	1102.43	618.307
RGMC.39632	d__Bacteria	p__Bacillota_A	c__Clostridia	o__Lachnospirales	f__Lachnospiraceae	g__RGIG5612	s__RGIG5612 sp017511185	368.672	439.141	444.305	423.406	482.781	409.922	556.561	447.81	748.163	479.903	1013.76	556.708
RGMC.14658	d__Bacteria	p__Bacillota_A	c__Clostridia	o__Lachnospirales	f__Lachnospiraceae	g__RGIG5612	s__RGIG5612 sp017511185	349.159	424.855	440.674	415.889	491.502	401.301	532.804	433.173	727.374	470.571	988.26	545.895
RGMC.29228	d__Bacteria	p__Bacillota_A	c__Clostridia	o__Lachnospirales	f__Lachnospiraceae	g__RGIG5612	s__RGIG5612 sp017511185	349.941	403.684	415.811	411.086	476.63	406.403	519.194	434.179	705.971	457.846	947.18	520.332
RGMC.14596	d__Bacteria	p__Bacillota_A	c__Clostridia	o__Lachnospirales	f__Lachnospiraceae	g__RGIG5612	s__RGIG5612 sp017511185	0	187.893	0	195.58	247.243	179.938	225.082	0	336.417	229.463	506.069	239.055
RGMC.14492	d__Bacteria	p__Bacillota_A	c__Clostridia	o__Lachnospirales	f__Lachnospiraceae	g__RGIG5612	s__RGIG5612 sp017536965	0	0	0	0	0	0	0	0	368.738	0	522.82	0
RGMC.15524	d__Bacteria	p__Bacillota_A	c__Clostridia	o__Lachnospirales	f__Lachnospiraceae	g__RGIG5612	s__RGIG5612 sp017536965	0	0	0	0	0	0	0	0	0	0	474.453	0
RGMC.16303	d__Bacteria	p__Bacillota_A	c__Clostridia	o__Lachnospirales	f__Lachnospiraceae	g__RUG11977	s__	1376.24	968.838	873.454	1146.79	1006.15	1149.81	627.402	665.495	450.516	699.373	412.131	515.695
RGMC.10775	d__Bacteria	p__Bacillota_A	c__Clostridia	o__Lachnospirales	f__Lachnospiraceae	g__RUG11977	s__RUG11977 sp016285135	168.278	0	0	0	0	0	0	0	0	0	0	0
RGMC.122	d__Bacteria	p__Bacillota_A	c__Clostridia	o__Lachnospirales	f__Lachnospiraceae	g__RUG11977	s__RUG11977 sp016287095	4687.18	6027.46	4900.13	10769.9	18521.9	4122.64	3211.26	6115.38	3062.62	13306.8	7349.24	7398.85
RGMC.2018	d__Bacteria	p__Bacillota_A	c__Clostridia	o__Lachnospirales	f__Lachnospiraceae	g__RUG11977	s__RUG11977 sp016287095	2290.25	1827.32	2744.85	3845.14	3883.11	3981.05	5048.58	4813.2	5745.59	5376.07	5567.07	3856.9
RGMC.21	d__Bacteria	p__Bacillota_A	c__Clostridia	o__Lachnospirales	f__Lachnospiraceae	g__RUG11977	s__RUG11977 sp016287095	731.035	605.837	875.136	1213.05	1339.39	1229.78	1680.64	1643.16	1941.57	1898.2	2106.75	1252.75
RGMC.15740	d__Bacteria	p__Bacillota_A	c__Clostridia	o__Lachnospirales	f__Lachnospiraceae	g__RUG11977	s__RUG11977 sp016288005	333.879	238.91	0	0	0	0	0	0	0	0	0	0
RGMC.515	d__Bacteria	p__Bacillota_A	c__Clostridia	o__Lachnospirales	f__Lachnospiraceae	g__RUG11977	s__RUG11977 sp016288005	414.065	0	0	0	0	0	0	0	0	0	0	0
RGMC.12301	d__Bacteria	p__Bacillota_A	c__Clostridia	o__Lachnospirales	f__Lachnospiraceae	g__RUG11977	s__RUG11977 sp017427415	987.293	549.333	675.275	925.042	1091.37	897.467	0	325.785	0	322.597	0	0
RGMC.5888	d__Bacteria	p__Bacillota_A	c__Clostridia	o__Lachnospirales	f__Lachnospiraceae	g__RUG11977	s__RUG11977 sp017427415	840.867	498.494	601.912	906.206	1086.08	824.177	0	0	0	0	0	0
RGMC.28642	d__Bacteria	p__Bacillota_A	c__Clostridia	o__Lachnospirales	f__Lachnospiraceae	g__RUG11977	s__RUG11977 sp017427415	746.292	444.954	575.375	690.967	549.952	734.248	0	0	0	0	0	0
RGMC.27726	d__Bacteria	p__Bacillota_A	c__Clostridia	o__Lachnospirales	f__Lachnospiraceae	g__RUG11977	s__RUG11977 sp017427415	632.592	350.173	436.253	545.214	510.425	552.806	0	0	0	0	0	0
RGMC.15227	d__Bacteria	p__Bacillota_A	c__Clostridia	o__Lachnospirales	f__Lachnospiraceae	g__RUG11977	s__RUG11977 sp017427415	558.522	310.36	386.663	479.999	500.693	481.877	0	0	0	0	0	0
RGMC.12335	d__Bacteria	p__Bacillota_A	c__Clostridia	o__Lachnospirales	f__Lachnospiraceae	g__RUG11977	s__RUG11977 sp017427415	419.876	236.93	274.983	361.226	408.917	357.65	0	0	0	0	0	0
RGMC.29611	d__Bacteria	p__Bacillota_A	c__Clostridia	o__Lachnospirales	f__Lachnospiraceae	g__RUG191	s__RUG191 sp905234245	0	2106.82	0	1818.53	0	1988.85	2670.97	1604.25	2739.48	1964.14	2053.65	3315.93
RGMC.18297	d__Bacteria	p__Bacillota_A	c__Clostridia	o__Lachnospirales	f__Lachnospiraceae	g__RUG191	s__RUG191 sp905234245	0	755.869	0	912.036	0	691.479	918.926	695.461	1086.44	970.99	1307.24	1091.19
RGMC.16363	d__Bacteria	p__Bacillota_A	c__Clostridia	o__Lachnospirales	f__Lachnospiraceae	g__RUG842	s__	0	0	0	0	0	0	415.325	0	377.394	0	316.472	493.501
RGMC.10741	d__Bacteria	p__Bacillota_A	c__Clostridia	o__Lachnospirales	f__Lachnospiraceae	g__SIG280	s__	756.077	583.996	1073.37	1005.09	716.31	1053.01	2072.27	1891.26	2071.38	2056.21	1523.69	1808.59
RGMC.16042	d__Bacteria	p__Bacillota_A	c__Clostridia	o__Lachnospirales	f__Lachnospiraceae	g__SIG280	s__	0	0	0	0	0	0	0	0	0	0	0	0
RGMC.17841	d__Bacteria	p__Bacillota_A	c__Clostridia	o__Lachnospirales	f__Lachnospiraceae	g__SIG280	s__SIG280 sp015058015	0	0	0	0	0	0	0	0	0	0	0	0
RGMC.29290	d__Bacteria	p__Bacillota_A	c__Clostridia	o__Lachnospirales	f__Lachnospiraceae	g__UBA1201	s__UBA1201 sp002309675	154.14	131.21	172.3	146.798	143.14	136.356	290.514	254.816	350.047	210.782	411.925	287.244
RGMC.71	d__Bacteria	p__Bacillota_A	c__Clostridia	o__Lachnospirales	f__Lachnospiraceae	g__UBA1201	s__UBA1201 sp002309675	0	0	0	0	0	0	0	0	155.633	0	188.555	126.685
RGMC.16279	d__Bacteria	p__Bacillota_A	c__Clostridia	o__Lachnospirales	f__Lachnospiraceae	g__UBA1258	s__UBA1258 sp017553505	611.624	800.788	722.139	1085.88	675.259	1416.37	2171.7	1754.12	1530.4	1338.7	822.254	1411.89
RGMC.16073	d__Bacteria	p__Bacillota_A	c__Clostridia	o__Lachnospirales	f__Lachnospiraceae	g__UBA1258	s__UBA1258 sp017553505	0	275.142	0	297.045	367.955	311.327	466.621	656.389	448.726	635.341	599.492	305.856
RGMC.16201	d__Bacteria	p__Bacillota_A	c__Clostridia	o__Lachnospirales	f__Lachnospiraceae	g__UBA1258	s__UBA1258 sp017553505	167.438	262.648	209.443	237.86	281.399	292.55	419.69	594.731	350.498	458.794	420.133	271.706
RGMC.11436	d__Bacteria	p__Bacillota_A	c__Clostridia	o__Lachnospirales	f__Lachnospiraceae	g__UBA1258	s__UBA1258 sp017963665	554.223	395.846	428.513	520.354	500.688	611.16	4184.02	2361.89	4568.15	2625.63	4028.01	2362.28
RGMC.5899	d__Bacteria	p__Bacillota_A	c__Clostridia	o__Lachnospirales	f__Lachnospiraceae	g__UBA1258	s__UBA1258 sp024687305	0	0	0	0	0	0	624.814	436.482	718.866	482.795	785.132	412.391
RGMC.373	d__Bacteria	p__Bacillota_A	c__Clostridia	o__Lachnospirales	f__Lachnospiraceae	g__UBA1258	s__UBA1258 sp024687305	0	0	0	0	0	0	510.278	365.311	636.089	436.747	718.16	301.396
RGMC.791	d__Bacteria	p__Bacillota_A	c__Clostridia	o__Lachnospirales	f__Lachnospiraceae	g__UBA1258	s__UBA1258 sp900100895	0	256.417	0	0	231.926	279.945	433.869	600.728	350.028	402.942	345.646	276.143
RGMC.18802	d__Bacteria	p__Bacillota_A	c__Clostridia	o__Lachnospirales	f__Lachnospiraceae	g__UBA1258	s__UBA1258 sp900100895	0	201.713	0	0	0	211.966	307.165	433.139	250.543	313.072	272.812	221.328
RGMC.26906	d__Bacteria	p__Bacillota_A	c__Clostridia	o__Lachnospirales	f__Lachnospiraceae	g__UBA1267	s__	819.072	555.436	601.267	451.211	452.767	460.874	421.562	366.801	488.733	340.163	482.754	521.919
RGMC.26937	d__Bacteria	p__Bacillota_A	c__Clostridia	o__Lachnospirales	f__Lachnospiraceae	g__UBA1267	s__	933.833	634.452	703.967	511.21	501.533	555.912	0	0	0	0	523.599	613.789
RGMC.14724	d__Bacteria	p__Bacillota_A	c__Clostridia	o__Lachnospirales	f__Lachnospiraceae	g__UBA1267	s__	142.895	126.405	131.461	0	0	119.917	0	0	0	0	0	0
RGMC.12351	d__Bacteria	p__Bacillota_A	c__Clostridia	o__Lachnospirales	f__Lachnospiraceae	g__UBA1267	s__UBA1267 sp002308115	184.979	159.872	172.847	148.22	161.328	144.364	118.547	0	133.069	0	119.669	126.093
RGMC.16157	d__Bacteria	p__Bacillota_A	c__Clostridia	o__Lachnospirales	f__Lachnospiraceae	g__UBA1267	s__UBA1267 sp002308115	127.848	108.336	0	0	0	105.658	0	0	0	0	0	0
RGMC.12356	d__Bacteria	p__Bacillota_A	c__Clostridia	o__Lachnospirales	f__Lachnospiraceae	g__UBA1267	s__UBA1267 sp017441825	686.583	555.635	556.392	505.84	563.598	431.406	285.177	342.744	313.206	327.241	342.42	381.139
RGMC.19933	d__Bacteria	p__Bacillota_A	c__Clostridia	o__Lachnospirales	f__Lachnospiraceae	g__UBA1267	s__UBA1267 sp902783795	1018.92	610.7	717.206	500.909	469.269	523.724	0	0	0	0	0	0
RGMC.40083	d__Bacteria	p__Bacillota_A	c__Clostridia	o__Lachnospirales	f__Lachnospiraceae	g__UBA1267	s__UBA1267 sp902783795	328.282	283.647	256.769	244.09	249.575	213.87	0	0	165.575	0	0	191.643
RGMC.15535	d__Bacteria	p__Bacillota_A	c__Clostridia	o__Lachnospirales	f__Lachnospiraceae	g__UBA1267	s__UBA1267 sp902803345	373.661	311.999	334.143	287.334	316.971	268.356	183.048	199.285	163.834	186.56	161.225	256.488
RGMC.21699	d__Bacteria	p__Bacillota_A	c__Clostridia	o__Lachnospirales	f__Lachnospiraceae	g__UBA1267	s__UBA1267 sp902803485	683.861	454.889	499.389	353.851	323.211	375.054	0	340.864	0	261.036	301.396	409.901
RGMC.1298	d__Bacteria	p__Bacillota_A	c__Clostridia	o__Lachnospirales	f__Lachnospiraceae	g__UBA1712	s__UBA1712 sp017540355	0	0	0	189.438	181.55	234.986	693.43	480.366	672.408	510.627	629.783	413.885
RGMC.15451	d__Bacteria	p__Bacillota_A	c__Clostridia	o__Lachnospirales	f__Lachnospiraceae	g__UBA1712	s__UBA1712 sp017540355	0	0	0	169.819	157.842	220.876	648.006	430.969	589.268	431.182	501.837	397.897
RGMC.10804	d__Bacteria	p__Bacillota_A	c__Clostridia	o__Lachnospirales	f__Lachnospiraceae	g__UBA1712	s__UBA1712 sp017540355	0	0	0	0	0	0	511.305	319.971	462.129	331.04	381.781	303.007
RGMC.20488	d__Bacteria	p__Bacillota_A	c__Clostridia	o__Lachnospirales	f__Lachnospiraceae	g__UBA1712	s__UBA1712 sp902789785	170.884	178.414	0	175.894	164.84	212.711	786.625	473.224	784.519	595.7	789.561	442.885
RGMC.590	d__Bacteria	p__Bacillota_A	c__Clostridia	o__Lachnospirales	f__Lachnospiraceae	g__UBA1712	s__UBA1712 sp902789785	0	0	0	0	0	0	816.17	570.719	852.579	775.212	957.759	490.916
RGMC.2360	d__Bacteria	p__Bacillota_A	c__Clostridia	o__Lachnospirales	f__Lachnospiraceae	g__UBA1712	s__UBA1712 sp902789785	154.921	152.612	134.063	145.508	151.561	154.124	596.153	442.934	697.619	582.791	847.576	344.635
RGMC.15416	d__Bacteria	p__Bacillota_A	c__Clostridia	o__Lachnospirales	f__Lachnospiraceae	g__UBA1712	s__UBA1712 sp902789785	0	0	0	0	0	0	676.713	417.05	651.202	502.587	626.304	384.423
RGMC.37988	d__Bacteria	p__Bacillota_A	c__Clostridia	o__Lachnospirales	f__Lachnospiraceae	g__UBA2868	s__	5835.26	10016.4	11804.7	4417.48	2737.58	7883.3	6672.98	6987.2	4734.82	3340.74	1925.29	8721.19
RGMC.38992	d__Bacteria	p__Bacillota_A	c__Clostridia	o__Lachnospirales	f__Lachnospiraceae	g__UBA2868	s__	2159.36	2846.28	3078.81	1350.15	988.974	1844.5	5411.93	5471.46	3574.02	3074.04	2330.58	5967.38
RGMC.39974	d__Bacteria	p__Bacillota_A	c__Clostridia	o__Lachnospirales	f__Lachnospiraceae	g__UBA2868	s__UBA2868 sp017450065	0	0	0	0	0	0	0	0	0	0	0	0
RGMC.12936	d__Bacteria	p__Bacillota_A	c__Clostridia	o__Lachnospirales	f__Lachnospiraceae	g__UBA2868	s__UBA2868 sp017450065	0	0	0	0	0	0	0	0	0	0	0	0
RGMC.28942	d__Bacteria	p__Bacillota_A	c__Clostridia	o__Lachnospirales	f__Lachnospiraceae	g__UBA2868	s__UBA2868 sp017450065	0	0	0	0	0	0	0	0	0	0	0	0
RGMC.12968	d__Bacteria	p__Bacillota_A	c__Clostridia	o__Lachnospirales	f__Lachnospiraceae	g__UBA2868	s__UBA2868 sp017458765	572.431	693.169	683.556	379.185	367.704	479.163	1229.14	1202.02	1055.52	796.836	843.495	1126.26
RGMC.15246	d__Bacteria	p__Bacillota_A	c__Clostridia	o__Lachnospirales	f__Lachnospiraceae	g__UBA2868	s__UBA2868 sp017526745	2423.83	1546.16	2247.39	1035.38	781.054	1599.27	1567.22	1840.4	1123.63	1185.53	643.242	1682.69
RGMC.10927	d__Bacteria	p__Bacillota_A	c__Clostridia	o__Lachnospirales	f__Lachnospiraceae	g__UBA2868	s__UBA2868 sp017526745	1567.19	1095.09	1545.65	787.753	608.42	1110.42	1105.57	1305.2	812.835	929.196	534.428	1128.42
RGMC.1814	d__Bacteria	p__Bacillota_A	c__Clostridia	o__Lachnospirales	f__Lachnospiraceae	g__UBA2868	s__UBA2868 sp900320345	0	0	0	0	0	0	0	0	0	0	0	0
RGMC.2035	d__Bacteria	p__Bacillota_A	c__Clostridia	o__Lachnospirales	f__Lachnospiraceae	g__UBA2868	s__UBA2868 sp900320345	0	0	0	0	0	0	0	0	0	0	0	0
RGMC.3378	d__Bacteria	p__Bacillota_A	c__Clostridia	o__Lachnospirales	f__Lachnospiraceae	g__UBA2868	s__UBA2868 sp900320345	0	0	0	0	0	0	0	0	0	0	0	0
RGMC.38767	d__Bacteria	p__Bacillota_A	c__Clostridia	o__Lachnospirales	f__Lachnospiraceae	g__UBA2868	s__UBA2868 sp900320345	0	0	0	0	0	0	0	0	0	0	0	0
RGMC.10846	d__Bacteria	p__Bacillota_A	c__Clostridia	o__Lachnospirales	f__Lachnospiraceae	g__UBA2868	s__UBA2868 sp900320345	0	0	0	0	0	0	0	0	0	0	0	0
RGMC.18412	d__Bacteria	p__Bacillota_A	c__Clostridia	o__Lachnospirales	f__Lachnospiraceae	g__UBA2868	s__UBA2868 sp900320345	0	0	0	0	0	0	0	0	0	0	0	0
RGMC.1567	d__Bacteria	p__Bacillota_A	c__Clostridia	o__Lachnospirales	f__Lachnospiraceae	g__UBA2912	s__	1980.07	1459.87	0	0	0	1421.85	0	0	1473.94	0	1442.39	0
RGMC.37470	d__Bacteria	p__Bacillota_A	c__Clostridia	o__Lachnospirales	f__Lachnospiraceae	g__UBA2912	s__	665.241	496.273	554.34	389.45	414.994	431.978	374.111	315.678	503.171	266.082	541.118	402.995
RGMC.10449	d__Bacteria	p__Bacillota_A	c__Clostridia	o__Lachnospirales	f__Lachnospiraceae	g__UBA2912	s__UBA2912 sp902796775	3048.03	3084.49	3755.9	2410.14	2731.77	2914.53	2513.44	2507.72	2556.7	1881.65	2277.13	2807.08
RGMC.37446	d__Bacteria	p__Bacillota_A	c__Clostridia	o__Lachnospirales	f__Lachnospiraceae	g__UBA2912	s__UBA2912 sp902796775	1353.57	1245.11	1381.46	1054.07	1043.7	1205.99	876.016	870.022	969.299	751.833	911.829	1068.4
RGMC.19887	d__Bacteria	p__Bacillota_A	c__Clostridia	o__Lachnospirales	f__Lachnospiraceae	g__UBA3305	s__UBA3305 sp902783295	0	847.843	1021.74	0	0	749.669	622.185	781.262	599.449	0	483.663	711.082
RGMC.29639	d__Bacteria	p__Bacillota_A	c__Clostridia	o__Lachnospirales	f__Lachnospiraceae	g__UBA3633	s__	0	0	0	0	0	0	0	0	0	0	0	0
RGMC.29494	d__Bacteria	p__Bacillota_A	c__Clostridia	o__Lachnospirales	f__Lachnospiraceae	g__UBA3633	s__UBA3633 sp902803205	0	0	0	0	0	0	0	0	0	0	0	0
RGMC.21670	d__Bacteria	p__Bacillota_A	c__Clostridia	o__Lachnospirales	f__Lachnospiraceae	g__UBA3633	s__UBA3633 sp902803205	0	0	0	0	0	0	0	0	0	0	0	0
RGMC.19827	d__Bacteria	p__Bacillota_A	c__Clostridia	o__Lachnospirales	f__Lachnospiraceae	g__UBA3766	s__UBA3766 sp902782715	2776.74	2212.67	2234.14	2047.9	2286.26	2295.78	1151.74	2170.52	867.696	1613.34	774.263	1076.66
RGMC.29261	d__Bacteria	p__Bacillota_A	c__Clostridia	o__Lachnospirales	f__Lachnospiraceae	g__UBA3774	s__	270.007	375.952	372.576	353.679	334.413	324.768	228.594	295.761	231.372	268.113	229.843	292.223
RGMC.26917	d__Bacteria	p__Bacillota_A	c__Clostridia	o__Lachnospirales	f__Lachnospiraceae	g__UBA3774	s__	205.48	289.956	282.755	276.585	258.712	244.759	180.582	224.009	185.454	203.882	186.792	240.001
RGMC.15479	d__Bacteria	p__Bacillota_A	c__Clostridia	o__Lachnospirales	f__Lachnospiraceae	g__UBA3775	s__UBA3775 sp017437965	0	0	0	0	0	0	0	0	0	0	144.392	0
RGMC.15257	d__Bacteria	p__Bacillota_A	c__Clostridia	o__Lachnospirales	f__Lachnospiraceae	g__UBA4292	s__UBA4292 sp902790095	0	0	0	0	0	0	0	0	0	0	0	0
RGMC.18133	d__Bacteria	p__Bacillota_A	c__Clostridia	o__Lachnospirales	f__Lachnospiraceae	g__VSOB01	s__VSOB01 sp015056735	0	0	0	0	0	0	0	0	0	0	0	0
RGMC.18239	d__Bacteria	p__Bacillota_A	c__Clostridia	o__Lachnospirales	f__Lachnospiraceae	g__XBB1006	s__XBB1006 sp015057115	0	0	0	0	0	0	195.808	0	208.18	0	237.992	871.463
RGMC.8259	d__Bacteria	p__Bacillota_A	c__Clostridia	o__Lachnospirales	f__Lachnospiraceae	g__XBB1006	s__XBB1006 sp016283755	172.348	162.857	203.172	346.569	418.423	257.069	1769.95	1117.99	1424.19	2856.47	1586.92	1695.26
RGMC.343	d__Bacteria	p__Bacillota_A	c__Clostridia	o__Lachnospirales	f__Lachnospiraceae	g__XBB1006	s__XBB1006 sp016283755	0	0	164.497	263.676	318.753	204.53	1254.54	798.98	963.89	2023.49	1074.75	1293.43
RGMC.12204	d__Bacteria	p__Bacillota_A	c__Clostridia	o__Lachnospirales	f__Lachnospiraceae	g__XBB1006	s__XBB1006 sp016283755	0	0	0	285.277	355.248	0	1198.88	848.604	1020.77	2279.35	1307.06	1230.62
RGMC.3890	d__Bacteria	p__Bacillota_A	c__Clostridia	o__Lachnospirales	f__Lachnospiraceae	g__XBB1006	s__XBB1006 sp016283755	0	0	0	223.703	260.196	178.727	1185.33	678.966	993.133	1626.44	1063.81	1107.98
RGMC.16210	d__Bacteria	p__Bacillota_A	c__Clostridia	o__Lachnospirales	f__Lachnospiraceae	g__XBB1006	s__XBB1006 sp016283755	0	0	134.526	209.039	245.654	169.063	1137.47	669.117	890.653	1648.62	947.618	1082.8
RGMC.557	d__Bacteria	p__Bacillota_A	c__Clostridia	o__Lachnospirales	f__Lachnospiraceae	g__XBB1006	s__XBB1006 sp016283755	0	0	0	0	0	0	542.759	335.267	413.807	786.524	409.276	554.767
RGMC.27013	d__Bacteria	p__Bacillota_A	c__Clostridia	o__Oscillospirales	f__Acutalibacteraceae	g__CAG-177	s__	392.457	369.507	368.842	333.435	330.987	277.956	0	125.739	0	0	0	116.775
RGMC.12252	d__Bacteria	p__Bacillota_A	c__Clostridia	o__Oscillospirales	f__Acutalibacteraceae	g__CAG-177	s__CAG-177 sp017428525	1068.89	593.784	658.462	490.925	534.998	465.844	0	227.353	0	0	181.505	224.937
RGMC.20227	d__Bacteria	p__Bacillota_A	c__Clostridia	o__Oscillospirales	f__Acutalibacteraceae	g__CAG-177	s__CAG-177 sp902787025	542.036	695.126	738.776	746.917	721.025	593.425	178.875	248.855	171.67	198.612	169.392	235.572
RGMC.14737	d__Bacteria	p__Bacillota_A	c__Clostridia	o__Oscillospirales	f__Acutalibacteraceae	g__CAG-177	s__CAG-177 sp902787025	413.816	519.936	544.666	554.368	534.792	445.804	125.864	188.403	123.931	128.634	114.933	164.681
RGMC.29043	d__Bacteria	p__Bacillota_A	c__Clostridia	o__Oscillospirales	f__Acutalibacteraceae	g__Eubacterium_R	s__Eubacterium_R sp017543415	0	327.602	344.621	379.481	404.598	326.868	419.805	372.421	486.072	350.468	563.296	366.78
RGMC.16091	d__Bacteria	p__Bacillota_A	c__Clostridia	o__Oscillospirales	f__Acutalibacteraceae	g__Eubacterium_R	s__Eubacterium_R sp017543415	0	421.83	0	425.844	334.678	522.407	0	0	724.332	0	448.368	639.251
RGMC.28626	d__Bacteria	p__Bacillota_A	c__Clostridia	o__Oscillospirales	f__Acutalibacteraceae	g__Eubacterium_R	s__Eubacterium_R sp017543415	0	0	0	359.095	0	398.861	0	0	596.237	0	414.596	0
RGMC.15531	d__Bacteria	p__Bacillota_A	c__Clostridia	o__Oscillospirales	f__Acutalibacteraceae	g__Eubacterium_R	s__Eubacterium_R sp017543415	0	0	0	0	0	0	0	0	0	0	92.2821	0
RGMC.212	d__Bacteria	p__Bacillota_A	c__Clostridia	o__Oscillospirales	f__Acutalibacteraceae	g__Fimenecus	s__Fimenecus sp016290515	0	130.666	139.644	160.717	171.683	135.524	0	0	0	0	107.393	0
RGMC.28440	d__Bacteria	p__Bacillota_A	c__Clostridia	o__Oscillospirales	f__Acutalibacteraceae	g__JAAZFZ01	s__JAAZFZ01 sp946626015	602.511	438.582	455.757	438.593	448.186	364.413	481.979	491.335	495.313	438.027	471.089	503.11
RGMC.12214	d__Bacteria	p__Bacillota_A	c__Clostridia	o__Oscillospirales	f__Acutalibacteraceae	g__RGIG2774	s__RGIG2774 sp017429345	312.47	0	0	0	0	0	0	0	0	0	0	0
RGMC.40295	d__Bacteria	p__Bacillota_A	c__Clostridia	o__Oscillospirales	f__Acutalibacteraceae	g__RUG592	s__RUG592 sp902785425	1400.18	2421.7	3109.27	2218.69	2037.62	2596.54	1250.92	1190	1213.33	724.8	1180.4	1278.25
RGMC.20080	d__Bacteria	p__Bacillota_A	c__Clostridia	o__Oscillospirales	f__Acutalibacteraceae	g__RUG592	s__RUG592 sp902785425	621.365	1860.01	2341.97	1824.26	1934.13	2142.79	726.761	823.74	748.018	582.736	922.195	744.909
RGMC.27295	d__Bacteria	p__Bacillota_A	c__Clostridia	o__Oscillospirales	f__Acutalibacteraceae	g__RUG806	s__	1195.08	542.715	571.334	450.365	531.18	388.87	284.748	272.269	322.807	241.991	392.644	361.535
RGMC.10818	d__Bacteria	p__Bacillota_A	c__Clostridia	o__Oscillospirales	f__Acutalibacteraceae	g__RUG806	s__	254.457	0	0	0	0	0	0	0	0	0	0	0
RGMC.12276	d__Bacteria	p__Bacillota_A	c__Clostridia	o__Oscillospirales	f__Acutalibacteraceae	g__RUG806	s__RUG806 sp017428085	755.056	413.721	415.88	348.455	402.869	276.142	197.608	205.934	236.639	204.477	327.723	278.815
RGMC.14165	d__Bacteria	p__Bacillota_A	c__Clostridia	o__Oscillospirales	f__Acutalibacteraceae	g__Ruminococcus_E	s__Ruminococcus_E sp002350765	4013.03	3876.59	4574.84	3734.24	2269	4677.22	6738.21	7752.49	6537.31	3981.14	2951.78	6358.04
RGMC.30719	d__Bacteria	p__Bacillota_A	c__Clostridia	o__Oscillospirales	f__Acutalibacteraceae	g__Ruminococcus_E	s__Ruminococcus_E sp902776375	7417.24	9790.73	13208.5	8814.86	8002.43	11175	22168.2	22491.7	27534.7	12056.3	15852.7	21379.3
RGMC.26765	d__Bacteria	p__Bacillota_A	c__Clostridia	o__Oscillospirales	f__Acutalibacteraceae	g__Ruminococcus_E	s__Ruminococcus_E sp902776375	0	8763.8	11923.7	7979.64	0	10178.5	21678.3	20999	24082.2	10752.5	13577.7	20170.5
RGMC.19211	d__Bacteria	p__Bacillota_A	c__Clostridia	o__Oscillospirales	f__Acutalibacteraceae	g__Ruminococcus_E	s__Ruminococcus_E sp902776375	0	2995.69	0	2685.06	0	3417.09	6271.92	6353.47	8077.2	3593.29	4905.41	5847.04
RGMC.22478	d__Bacteria	p__Bacillota_A	c__Clostridia	o__Oscillospirales	f__Acutalibacteraceae	g__Ruminococcus_E	s__Ruminococcus_E sp902776375	0	815.404	922.668	698.67	623.811	814.969	1611.93	1423.53	1922.98	940.636	1545.57	1281.09
RGMC.19776	d__Bacteria	p__Bacillota_A	c__Clostridia	o__Oscillospirales	f__Acutalibacteraceae	g__Ruminococcus_E	s__Ruminococcus_E sp902779225	0	0	0	0	0	0	399.582	322.258	481.362	0	423.92	0
RGMC.19482	d__Bacteria	p__Bacillota_A	c__Clostridia	o__Oscillospirales	f__Acutalibacteraceae	g__Ruminococcus_E	s__Ruminococcus_E sp902779225	0	0	0	0	0	0	269.307	0	332.261	0	291.75	0
RGMC.39189	d__Bacteria	p__Bacillota_A	c__Clostridia	o__Oscillospirales	f__Acutalibacteraceae	g__SIG598	s__	0	418.904	506.094	328.862	331.646	349.104	0	0	0	0	0	0
RGMC.28517	d__Bacteria	p__Bacillota_A	c__Clostridia	o__Oscillospirales	f__Acutalibacteraceae	g__UBA1425	s__	528.57	424.23	440.022	420.176	485.537	329.067	262.243	312.503	278.759	237.781	327.342	291.392
RGMC.40392	d__Bacteria	p__Bacillota_A	c__Clostridia	o__Oscillospirales	f__Acutalibacteraceae	g__UBA1425	s__	0	0	0	0	257.221	0	0	0	0	0	0	0
RGMC.27205	d__Bacteria	p__Bacillota_A	c__Clostridia	o__Oscillospirales	f__Acutalibacteraceae	g__UBA6857	s__	277.242	158.204	179.245	151.672	172.794	120.633	0	0	122.256	0	163.598	124.835
RGMC.39203	d__Bacteria	p__Bacillota_A	c__Clostridia	o__Oscillospirales	f__Acutalibacteraceae	g__UBA737	s__	122.945	0	0	0	0	0	0	0	0	99.3605	80.7443	103.021
RGMC.39375	d__Bacteria	p__Bacillota_A	c__Clostridia	o__Oscillospirales	f__Acutalibacteraceae	g__UBA737	s__	99.4246	0	0	0	0	0	78.4458	0	0	0	84.5791	80.538
RGMC.132	d__Bacteria	p__Bacillota_A	c__Clostridia	o__Oscillospirales	f__Acutalibacteraceae	g__UBA737	s__UBA737 sp016287385	154.099	0	0	0	0	0	0	0	0	0	0	0
RGMC.22147	d__Bacteria	p__Bacillota_A	c__Clostridia	o__Oscillospirales	f__Acutalibacteraceae	g__UBA737	s__UBA737 sp016287385	134.438	0	0	0	0	0	0	0	0	0	0	0
RGMC.21171	d__Bacteria	p__Bacillota_A	c__Clostridia	o__Oscillospirales	f__Acutalibacteraceae	g__UBA737	s__UBA737 sp016287385	103.146	0	0	0	0	0	0	0	0	0	0	0
RGMC.18142	d__Bacteria	p__Bacillota_A	c__Clostridia	o__Oscillospirales	f__Butyricicoccaceae	g__RGIG1902	s__RGIG1902 sp015068445	0	0	0	0	0	0	247.249	0	294.377	0	307.85	194.932
RGMC.19942	d__Bacteria	p__Bacillota_A	c__Clostridia	o__Oscillospirales	f__CAG-272	g__CAG-390	s__CAG-390 sp902783905	147.32	98.8613	0	103.208	0	87.1219	0	0	0	0	0	0
RGMC.266	d__Bacteria	p__Bacillota_A	c__Clostridia	o__Oscillospirales	f__CAG-272	g__CAG-390	s__CAG-390 sp902783905	157.961	0	0	0	0	0	0	0	0	0	0	0
RGMC.13039	d__Bacteria	p__Bacillota_A	c__Clostridia	o__Oscillospirales	f__CAG-272	g__RGIG2161	s__RGIG2161 sp017959065	401.892	248.018	266.579	251.232	219.812	225.798	125.852	166.755	0	161.175	0	190.814
RGMC.12953	d__Bacteria	p__Bacillota_A	c__Clostridia	o__Oscillospirales	f__CAG-272	g__RUG14240	s__RUG14240 sp902797125	0	0	0	133.077	138.159	109.44	0	0	0	168.252	112.52	0
RGMC.19899	d__Bacteria	p__Bacillota_A	c__Clostridia	o__Oscillospirales	f__CAG-272	g__SIG701	s__	225.755	144.472	163.945	168.824	176.26	152.534	0	149.016	0	0	0	124.036
RGMC.160	d__Bacteria	p__Bacillota_A	c__Clostridia	o__Oscillospirales	f__CAG-272	g__SIG701	s__SIG701 sp016288155	377.11	214.712	216.079	202.924	210.707	170.772	0	0	0	0	0	182.533
RGMC.37683	d__Bacteria	p__Bacillota_A	c__Clostridia	o__Oscillospirales	f__CAG-272	g__UBA1248	s__	226.254	154.311	0	132.518	155.138	124.411	260.43	233.132	279.553	295.381	297.893	275.132
RGMC.37536	d__Bacteria	p__Bacillota_A	c__Clostridia	o__Oscillospirales	f__CAG-272	g__UBA1248	s__	107.347	92.4427	0	0	0	74.0616	172.36	148.874	174.289	200.691	194.7	169.544
RGMC.12145	d__Bacteria	p__Bacillota_A	c__Clostridia	o__Oscillospirales	f__CAG-272	g__UBA1740	s__UBA1740 sp017961575	0	0	0	0	134.594	0	0	0	0	184.982	106.276	0
RGMC.15363	d__Bacteria	p__Bacillota_A	c__Clostridia	o__Oscillospirales	f__CAG-272	g__UBA1740	s__UBA1740 sp946404295	130.916	120.96	0	205.497	263.929	172.809	232.074	206.228	172.436	379.833	208.388	176.708
RGMC.12798	d__Bacteria	p__Bacillota_A	c__Clostridia	o__Oscillospirales	f__CAG-272	g__UBA1770	s__UBA1770 sp017451045	263.328	0	0	178.63	153.142	143.165	166.586	0	0	233.051	160.937	143.466
RGMC.15459	d__Bacteria	p__Bacillota_A	c__Clostridia	o__Oscillospirales	f__CAG-272	g__UMGS1696	s__UMGS1696 sp902773525	401.333	321.93	331.131	266.102	283.437	243.384	0	169.624	0	0	140.51	176.78
RGMC.18936	d__Bacteria	p__Bacillota_A	c__Clostridia	o__Oscillospirales	f__CAG-272	g__UMGS1696	s__UMGS1696 sp902773525	303.963	264.393	255.713	223.469	240.007	198.935	0	0	0	0	0	125.265
RGMC.19802	d__Bacteria	p__Bacillota_A	c__Clostridia	o__Oscillospirales	f__CAG-272	g__UMGS1696	s__UMGS1696 sp902782445	177.498	172.428	161.155	153.942	159.332	124.192	131.691	0	149.426	0	160.015	159.826
RGMC.22050	d__Bacteria	p__Bacillota_A	c__Clostridia	o__Oscillospirales	f__CAG-272	g__UMGS1696	s__UMGS1696 sp902782445	171.14	164.429	157.946	149.806	149.498	122.408	0	0	142.276	0	153.041	155.918
RGMC.10917	d__Bacteria	p__Bacillota_A	c__Clostridia	o__Oscillospirales	f__CAG-272	g__UMGS1696	s__UMGS1696 sp902782445	153.224	142.8	136.485	127.563	131.743	107.346	0	0	121.142	0	127.127	136.515
RGMC.12318	d__Bacteria	p__Bacillota_A	c__Clostridia	o__Oscillospirales	f__Feifaniaceae	g__Galloscillospira_B	s__Galloscillospira_B sp017427525	511.62	438.119	507.053	493.634	479.185	430.926	0	0	0	0	0	0
RGMC.15442	d__Bacteria	p__Bacillota_A	c__Clostridia	o__Oscillospirales	f__Oscillospiraceae	g__Alloscillospira	s__Alloscillospira sp017540565	336.377	354.452	366.347	298.496	305.931	291.035	428.746	367.701	492.007	313.577	535.81	405.505
RGMC.37408	d__Bacteria	p__Bacillota_A	c__Clostridia	o__Oscillospirales	f__Oscillospiraceae	g__Evtepia	s__	3096.7	2188.86	2187.01	1831.13	1791.37	1366.37	1210.58	1545.56	939.68	1214.82	1072.07	1470.86
RGMC.25807	d__Bacteria	p__Bacillota_A	c__Clostridia	o__Oscillospirales	f__Oscillospiraceae	g__Faecousia	s__	1244.82	1769.49	1865.95	2177.92	2155.31	1588.81	988.947	2290.52	278.143	1960.37	147.882	1761.09
RGMC.10548	d__Bacteria	p__Bacillota_A	c__Clostridia	o__Oscillospirales	f__Oscillospiraceae	g__Faecousia	s__	1110.73	1554.2	1647.97	1848.66	1884.48	1390.81	1011.67	2283.35	294.898	1962.47	154.176	1805.03
RGMC.5868	d__Bacteria	p__Bacillota_A	c__Clostridia	o__Oscillospirales	f__Oscillospiraceae	g__Faecousia	s__	638.644	951.321	963.389	1148.17	1196.24	825.923	712.771	1541.53	218.321	1373.99	123.084	1199.08
RGMC.23973	d__Bacteria	p__Bacillota_A	c__Clostridia	o__Oscillospirales	f__Oscillospiraceae	g__Faecousia	s__	738.589	701.543	773.15	696.069	729.544	587.348	163.082	568.561	0	440.797	0	315.723
RGMC.26898	d__Bacteria	p__Bacillota_A	c__Clostridia	o__Oscillospirales	f__Oscillospiraceae	g__Faecousia	s__	780.44	595.585	553.895	455.224	443.613	407.752	234.554	280.04	250.157	211.681	211.181	297.904
RGMC.18143	d__Bacteria	p__Bacillota_A	c__Clostridia	o__Oscillospirales	f__Oscillospiraceae	g__Faecousia	s__Faecousia sp015068455	522.948	492.084	468.391	412.973	407.603	362.561	200.641	231.77	229.13	168.283	201.971	232.943
RGMC.38570	d__Bacteria	p__Bacillota_A	c__Clostridia	o__Oscillospirales	f__Oscillospiraceae	g__Faecousia	s__Faecousia sp015068455	252.001	243.191	223.457	210.144	199.755	181.705	0	0	125.747	0	128.702	125.768
RGMC.319	d__Bacteria	p__Bacillota_A	c__Clostridia	o__Oscillospirales	f__Oscillospiraceae	g__Faecousia	s__Faecousia sp016282135	1324.76	1407.28	1230.81	1197.98	1225.15	950.815	273.772	689.855	0	609.385	0	535.038
RGMC.18085	d__Bacteria	p__Bacillota_A	c__Clostridia	o__Oscillospirales	f__Oscillospiraceae	g__Hominicoprocola	s__Hominicoprocola sp015067435	0	0	0	0	0	0	0	0	0	0	255.239	0
RGMC.19526	d__Bacteria	p__Bacillota_A	c__Clostridia	o__Oscillospirales	f__Oscillospiraceae	g__Hominicoprocola	s__Hominicoprocola sp902779695	0	0	0	0	0	0	0	0	0	0	395.674	0
RGMC.40221	d__Bacteria	p__Bacillota_A	c__Clostridia	o__Oscillospirales	f__Oscillospiraceae	g__Limivicinus	s__	0	12532.3	0	8868.91	6115.38	12639.6	11207	8120.42	9252.12	5367.69	3952.34	10341.9
RGMC.40394	d__Bacteria	p__Bacillota_A	c__Clostridia	o__Oscillospirales	f__Oscillospiraceae	g__Limivicinus	s__	0	7942.91	8384.4	5528.66	3785.72	8127.53	7398.25	5395.49	6250.05	3522.38	2797.66	6668.73
RGMC.9790	d__Bacteria	p__Bacillota_A	c__Clostridia	o__Oscillospirales	f__Oscillospiraceae	g__Limivicinus	s__	1280.42	1898.47	1921.5	1458.07	1400.55	1462.18	1597.45	1419.76	1280.93	1124.88	1003.73	1334.84
RGMC.11114	d__Bacteria	p__Bacillota_A	c__Clostridia	o__Oscillospirales	f__Oscillospiraceae	g__Limivicinus	s__	1080.31	1663.27	1661.14	1216.17	1318.69	1212.61	1290.34	1218.17	1096.24	1032.9	976.854	1176.03
RGMC.7461	d__Bacteria	p__Bacillota_A	c__Clostridia	o__Oscillospirales	f__Oscillospiraceae	g__Limivicinus	s__	1072.37	1555.5	1575.45	1153.73	1208.68	1155.24	1260.9	1212.01	1004.14	943.634	849.939	1052.64
RGMC.38540	d__Bacteria	p__Bacillota_A	c__Clostridia	o__Oscillospirales	f__Oscillospiraceae	g__Limivicinus	s__	1035.35	1215.75	1286.45	823.107	814.818	1047.42	982.19	805.11	960.133	614.885	758.279	888.231
RGMC.38354	d__Bacteria	p__Bacillota_A	c__Clostridia	o__Oscillospirales	f__Oscillospiraceae	g__Limivicinus	s__	387.664	525.339	493.053	381.938	446.623	407.192	479.603	459.797	523.665	427.219	532.929	441.33
RGMC.26921	d__Bacteria	p__Bacillota_A	c__Clostridia	o__Oscillospirales	f__Oscillospiraceae	g__Limivicinus	s__	421.359	451.514	446.782	309.868	331.721	338.546	391.435	382.541	351.733	275.188	306.81	322.3
RGMC.17047	d__Bacteria	p__Bacillota_A	c__Clostridia	o__Oscillospirales	f__Oscillospiraceae	g__Limivicinus	s__Limivicinus sp017395085	488.728	526.386	566.614	377.791	412.731	427.091	507.008	425.259	461.408	356.74	383.623	497.664
RGMC.14635	d__Bacteria	p__Bacillota_A	c__Clostridia	o__Oscillospirales	f__Oscillospiraceae	g__Limivicinus	s__Limivicinus sp017395085	443.49	447.888	461.244	310.856	346.706	370.3	437.419	385.358	432.138	288.954	332.89	419.327
RGMC.15243	d__Bacteria	p__Bacillota_A	c__Clostridia	o__Oscillospirales	f__Oscillospiraceae	g__Limivicinus	s__Limivicinus sp017395085	242.449	255.167	263.767	184.675	208.521	203.514	243.943	229.423	267.752	192.848	237.235	247.488
RGMC.14493	d__Bacteria	p__Bacillota_A	c__Clostridia	o__Oscillospirales	f__Oscillospiraceae	g__Limivicinus	s__Limivicinus sp017395085	167.658	188.66	191.723	132.703	158.876	146.484	210.288	172.792	242.402	157.835	221.369	213.966
RGMC.16803	d__Bacteria	p__Bacillota_A	c__Clostridia	o__Oscillospirales	f__Oscillospiraceae	g__Limivicinus	s__Limivicinus sp017395085	0	217.203	207.91	0	0	161.851	220.758	197.935	252.75	173.888	230.447	215.129
RGMC.12084	d__Bacteria	p__Bacillota_A	c__Clostridia	o__Oscillospirales	f__Oscillospiraceae	g__Limivicinus	s__Limivicinus sp017432615	0	0	0	0	0	0	0	0	481.875	0	387.078	0
RGMC.12008	d__Bacteria	p__Bacillota_A	c__Clostridia	o__Oscillospirales	f__Oscillospiraceae	g__Limivicinus	s__Limivicinus sp017434755	323.581	288.951	297.176	217.096	239.592	241.626	215.137	0	224.509	0	211.005	246.203
RGMC.40310	d__Bacteria	p__Bacillota_A	c__Clostridia	o__Oscillospirales	f__Oscillospiraceae	g__Limivicinus	s__Limivicinus sp017434755	182.509	190.711	176.301	159.522	189.926	154.69	0	0	161.19	0	161.399	140.507
RGMC.13089	d__Bacteria	p__Bacillota_A	c__Clostridia	o__Oscillospirales	f__Oscillospiraceae	g__Limivicinus	s__Limivicinus sp017458335	1878.16	2765.76	2871.11	2062.41	2052.4	2131.55	2107.25	2055.03	1764.47	1632.91	1458.31	1936.98
RGMC.15292	d__Bacteria	p__Bacillota_A	c__Clostridia	o__Oscillospirales	f__Oscillospiraceae	g__Limivicinus	s__Limivicinus sp017535865	2464.85	3229.51	3602.9	2101.21	1632.09	2850.25	1818.64	1438.42	1364.3	1021.25	859.606	1509.97
RGMC.794	d__Bacteria	p__Bacillota_A	c__Clostridia	o__Oscillospirales	f__Oscillospiraceae	g__Limivicinus	s__Limivicinus sp024685535	293.831	288.85	292.742	241.818	271.858	244.22	295.215	240.36	336.828	220.027	338.856	280.877
RGMC.458	d__Bacteria	p__Bacillota_A	c__Clostridia	o__Oscillospirales	f__Oscillospiraceae	g__Limivicinus	s__Limivicinus sp024691985	635.551	1182.03	1011.3	851.359	1205.31	1046.52	1329.15	1193.94	1533.77	1190.88	1507.12	1264.61
RGMC.35986	d__Bacteria	p__Bacillota_A	c__Clostridia	o__Oscillospirales	f__Oscillospiraceae	g__Limivicinus	s__Limivicinus sp900317375	5127.27	4737.43	4897.04	3719.67	3829.99	3695.07	3203.67	3298.98	2615.04	2506.14	2425.38	3503.51
RGMC.12022	d__Bacteria	p__Bacillota_A	c__Clostridia	o__Oscillospirales	f__Oscillospiraceae	g__Limivicinus	s__Limivicinus sp900317375	3910.41	4135.24	4191.64	3174.21	3430.08	3128.77	2959.5	2945.98	2439.57	2410.54	2282.98	3288.53
RGMC.28920	d__Bacteria	p__Bacillota_A	c__Clostridia	o__Oscillospirales	f__Oscillospiraceae	g__Limivicinus	s__Limivicinus sp900317375	3131.47	3141.44	3239.51	2626.95	2626.6	2459.48	1983.23	2097.91	1658.18	1578.14	1565.05	2018.37
RGMC.28974	d__Bacteria	p__Bacillota_A	c__Clostridia	o__Oscillospirales	f__Oscillospiraceae	g__Limivicinus	s__Limivicinus sp900317375	2130.95	1956.61	2021.69	1604.57	1728.62	1516.61	1306.58	1370.52	1094.41	1078.07	1076.52	1412.68
RGMC.29559	d__Bacteria	p__Bacillota_A	c__Clostridia	o__Oscillospirales	f__Oscillospiraceae	g__Limivicinus	s__Limivicinus sp900317375	1793.38	1468.36	1476.74	1147.56	1296.13	1127.69	1005.1	1095.55	907.383	856.822	876.279	1098.63
RGMC.28994	d__Bacteria	p__Bacillota_A	c__Clostridia	o__Oscillospirales	f__Oscillospiraceae	g__Limivicinus	s__Limivicinus sp900317375	1828.38	1444.24	1545.06	1167.88	1199.86	1124.27	931.415	1007.41	755.17	744.749	711.03	1063.45
RGMC.21603	d__Bacteria	p__Bacillota_A	c__Clostridia	o__Oscillospirales	f__Oscillospiraceae	g__Limivicinus	s__Limivicinus sp900317375	1317.89	1565.2	1591.86	1318.1	1244.26	1216.9	987.453	992.044	779.927	689.422	651.154	864.605
RGMC.28945	d__Bacteria	p__Bacillota_A	c__Clostridia	o__Oscillospirales	f__Oscillospiraceae	g__Limivicinus	s__Limivicinus sp900317375	1266.43	1310.56	1347.01	1123.51	1124.98	1024.98	832.596	835.553	671.799	641.144	623.292	810.14
RGMC.18694	d__Bacteria	p__Bacillota_A	c__Clostridia	o__Oscillospirales	f__Oscillospiraceae	g__Limivicinus	s__Limivicinus sp900317375	890.027	907.441	925.419	718.484	797.485	711.721	676.52	673.171	539.633	513.725	489.226	709.068
RGMC.21372	d__Bacteria	p__Bacillota_A	c__Clostridia	o__Oscillospirales	f__Oscillospiraceae	g__Limivicinus	s__Limivicinus sp900317375	1231	972.647	1032.86	746.821	758.03	732.026	619.662	637.781	450.867	466.999	396.001	682.561
RGMC.37331	d__Bacteria	p__Bacillota_A	c__Clostridia	o__Oscillospirales	f__Oscillospiraceae	g__Limivicinus	s__Limivicinus sp900317375	1027.91	899.559	920.659	694.031	737.401	679.805	646.193	655.833	508.623	504.679	448.942	675.027
RGMC.18724	d__Bacteria	p__Bacillota_A	c__Clostridia	o__Oscillospirales	f__Oscillospiraceae	g__Limivicinus	s__Limivicinus sp900317375	973.729	916.111	928.484	705.97	742.36	698.947	652.273	648.556	479.877	480.354	412.854	649.285
RGMC.3883	d__Bacteria	p__Bacillota_A	c__Clostridia	o__Oscillospirales	f__Oscillospiraceae	g__Limivicinus	s__Limivicinus sp900317375	1117.95	913.572	964.902	700.011	728.933	678.887	596.383	609.162	445.091	453.939	400.081	657.851
RGMC.18949	d__Bacteria	p__Bacillota_A	c__Clostridia	o__Oscillospirales	f__Oscillospiraceae	g__Limivicinus	s__Limivicinus sp900317375	910.752	845.552	867.494	689.158	757.788	656.993	557.904	583.689	444.908	465.293	435.665	621.642
RGMC.1281	d__Bacteria	p__Bacillota_A	c__Clostridia	o__Oscillospirales	f__Oscillospiraceae	g__Limivicinus	s__Limivicinus sp900317375	816.101	845.914	894.478	752.492	725.474	708.299	574.572	574.437	442.446	467.657	418.747	621.514
RGMC.22299	d__Bacteria	p__Bacillota_A	c__Clostridia	o__Oscillospirales	f__Oscillospiraceae	g__Limivicinus	s__Limivicinus sp900317375	1014.17	875.037	921.065	680.358	709.322	674.57	593.696	603.706	439.776	461.217	391.016	655.48
RGMC.18835	d__Bacteria	p__Bacillota_A	c__Clostridia	o__Oscillospirales	f__Oscillospiraceae	g__Limivicinus	s__Limivicinus sp900317375	924.52	845.81	877.947	647.171	704.168	653.986	599.019	582.069	448.993	445.151	406.325	627.374
RGMC.18718	d__Bacteria	p__Bacillota_A	c__Clostridia	o__Oscillospirales	f__Oscillospiraceae	g__Limivicinus	s__Limivicinus sp900317375	933.385	842.006	876.227	646.918	690.746	634.359	587.775	577.686	441.647	438.756	401.071	616.003
RGMC.18646	d__Bacteria	p__Bacillota_A	c__Clostridia	o__Oscillospirales	f__Oscillospiraceae	g__Limivicinus	s__Limivicinus sp900317375	889.339	828.142	854.896	640.572	671.7	627.556	573.597	570.128	433.746	429.283	386.128	603.221
RGMC.29055	d__Bacteria	p__Bacillota_A	c__Clostridia	o__Oscillospirales	f__Oscillospiraceae	g__Limivicinus	s__Limivicinus sp900317375	870.825	795.66	824.284	621.2	645.499	598.927	555.795	537.813	413.493	406.322	374.196	576.657
RGMC.37275	d__Bacteria	p__Bacillota_A	c__Clostridia	o__Oscillospirales	f__Oscillospiraceae	g__Limivicinus	s__Limivicinus sp900317375	921.038	771.709	796.875	624.66	650.705	602.864	535.805	546.671	394.879	412.818	363.728	529.164
RGMC.20006	d__Bacteria	p__Bacillota_A	c__Clostridia	o__Oscillospirales	f__Oscillospiraceae	g__Limivicinus	s__Limivicinus sp900317375	820.409	776.765	788.983	597.592	633.754	582.715	546.375	535.328	412.399	403.193	367.11	570.649
RGMC.37426	d__Bacteria	p__Bacillota_A	c__Clostridia	o__Oscillospirales	f__Oscillospiraceae	g__Limivicinus	s__Limivicinus sp900317375	834.887	764.146	779.64	605.23	570.007	586.666	539.526	505.697	416.706	391.775	333.644	565.576
RGMC.19993	d__Bacteria	p__Bacillota_A	c__Clostridia	o__Oscillospirales	f__Oscillospiraceae	g__Limivicinus	s__Limivicinus sp900317375	799.405	735.866	762.008	580.387	639.286	562.311	524.883	532.654	403.318	418.161	379.613	552.985
RGMC.15089	d__Bacteria	p__Bacillota_A	c__Clostridia	o__Oscillospirales	f__Oscillospiraceae	g__Limivicinus	s__Limivicinus sp900317375	782.186	734.926	756.481	592.782	585.44	573.638	506.259	494.335	422.352	392.413	367.961	561.766
RGMC.938	d__Bacteria	p__Bacillota_A	c__Clostridia	o__Oscillospirales	f__Oscillospiraceae	g__Limivicinus	s__Limivicinus sp900317375	832.164	743.546	762.577	579.817	618.565	568.787	520.074	523.069	392.8	393.79	360.567	558.812
RGMC.20282	d__Bacteria	p__Bacillota_A	c__Clostridia	o__Oscillospirales	f__Oscillospiraceae	g__Limivicinus	s__Limivicinus sp900317375	784.061	740.093	762.774	574.723	630.537	569.169	532.812	518.851	399.074	394.783	364.249	546.809
RGMC.19963	d__Bacteria	p__Bacillota_A	c__Clostridia	o__Oscillospirales	f__Oscillospiraceae	g__Limivicinus	s__Limivicinus sp900317375	809.767	741.357	771.701	576.95	617.851	564.722	527.592	517.878	390.615	393.724	355.407	543.492
RGMC.38038	d__Bacteria	p__Bacillota_A	c__Clostridia	o__Oscillospirales	f__Oscillospiraceae	g__Limivicinus	s__Limivicinus sp900317375	895.825	728.726	765.032	571.018	617.397	559.895	487.108	503.58	384.945	385.841	360.16	542.053
RGMC.20031	d__Bacteria	p__Bacillota_A	c__Clostridia	o__Oscillospirales	f__Oscillospiraceae	g__Limivicinus	s__Limivicinus sp900317375	789.534	734.972	760.741	580.606	612.809	558.22	513.421	507.153	384.071	384.941	354.091	544.957
RGMC.20023	d__Bacteria	p__Bacillota_A	c__Clostridia	o__Oscillospirales	f__Oscillospiraceae	g__Limivicinus	s__Limivicinus sp900317375	798.489	731.95	761.551	575.048	605.874	562.082	508.802	506.245	384.048	387.756	342.902	530.739
RGMC.21431	d__Bacteria	p__Bacillota_A	c__Clostridia	o__Oscillospirales	f__Oscillospiraceae	g__Limivicinus	s__Limivicinus sp900317375	730.782	711.9	722.907	550.76	603.774	544.717	518.534	508.961	397.684	399.256	368.589	539.374
RGMC.4265	d__Bacteria	p__Bacillota_A	c__Clostridia	o__Oscillospirales	f__Oscillospiraceae	g__Limivicinus	s__Limivicinus sp900317375	727.738	727.383	710.859	577.14	607.681	551.197	521.954	518.42	376.599	394.248	345.124	494.9
RGMC.18836	d__Bacteria	p__Bacillota_A	c__Clostridia	o__Oscillospirales	f__Oscillospiraceae	g__Limivicinus	s__Limivicinus sp900317375	752.332	706.674	719.183	570.257	560.979	545.684	480.632	470.134	373.688	360.354	323.437	531.227
RGMC.21396	d__Bacteria	p__Bacillota_A	c__Clostridia	o__Oscillospirales	f__Oscillospiraceae	g__Limivicinus	s__Limivicinus sp900317375	755.986	699.589	718.773	539.086	582.958	531.129	495.032	488.536	374.812	380.08	346.469	520.642
RGMC.37724	d__Bacteria	p__Bacillota_A	c__Clostridia	o__Oscillospirales	f__Oscillospiraceae	g__Limivicinus	s__Limivicinus sp900317375	796.868	678.978	708.033	533.497	577.55	519.043	473.428	494.268	360.227	360.955	329.216	484.558
RGMC.22356	d__Bacteria	p__Bacillota_A	c__Clostridia	o__Oscillospirales	f__Oscillospiraceae	g__Limivicinus	s__Limivicinus sp900317375	738.533	662.416	695.631	517.697	557.696	502.574	476.669	465.682	360.299	362.04	330.152	513.118
RGMC.20602	d__Bacteria	p__Bacillota_A	c__Clostridia	o__Oscillospirales	f__Oscillospiraceae	g__Limivicinus	s__Limivicinus sp900317375	721.18	651.199	663.312	487.807	530.929	478.482	445.537	460.847	349.394	348.779	326.645	485.041
RGMC.1595	d__Bacteria	p__Bacillota_A	c__Clostridia	o__Oscillospirales	f__Oscillospiraceae	g__Limivicinus	s__Limivicinus sp900317375	633.295	604.31	592.785	466.897	493.837	463.533	459.277	451.783	384.885	349.162	349.125	460.399
RGMC.19536	d__Bacteria	p__Bacillota_A	c__Clostridia	o__Oscillospirales	f__Oscillospiraceae	g__Limivicinus	s__Limivicinus sp900317375	648.478	608.196	616.128	473.597	472.333	464.959	420.815	413.755	340.645	313.706	279.488	467.225
RGMC.37376	d__Bacteria	p__Bacillota_A	c__Clostridia	o__Oscillospirales	f__Oscillospiraceae	g__Limivicinus	s__Limivicinus sp900317375	754.128	590.392	622.239	500.042	475.51	469.597	387.227	390.285	298.524	293.384	268.067	397.793
RGMC.20680	d__Bacteria	p__Bacillota_A	c__Clostridia	o__Oscillospirales	f__Oscillospiraceae	g__Limivicinus	s__Limivicinus sp900317375	576.184	577.245	585.571	466.233	467.381	444.768	407.105	389.591	330.43	312.19	284.719	437.616
RGMC.20010	d__Bacteria	p__Bacillota_A	c__Clostridia	o__Oscillospirales	f__Oscillospiraceae	g__Limivicinus	s__Limivicinus sp900317375	628.321	588.335	595.697	433.344	478.397	433.184	432.043	428.328	331.988	321.882	293.287	432.971
RGMC.3372	d__Bacteria	p__Bacillota_A	c__Clostridia	o__Oscillospirales	f__Oscillospiraceae	g__Limivicinus	s__Limivicinus sp900317375	533.014	543.312	545.85	440.902	444.035	421.671	382.927	366.164	305.667	299.362	274.264	410.046
RGMC.11860	d__Bacteria	p__Bacillota_A	c__Clostridia	o__Oscillospirales	f__Oscillospiraceae	g__Limivicinus	s__Limivicinus sp900317375	524.293	530.92	538.982	466.666	459.656	432.73	382.85	368.158	297.948	294.228	270.85	373.202
RGMC.37354	d__Bacteria	p__Bacillota_A	c__Clostridia	o__Oscillospirales	f__Oscillospiraceae	g__Limivicinus	s__Limivicinus sp900317375	358.762	471.474	442.219	431.817	503.168	340.524	325.539	318.834	270.322	277.225	275.798	347.566
RGMC.37705	d__Bacteria	p__Bacillota_A	c__Clostridia	o__Oscillospirales	f__Oscillospiraceae	g__Limivicinus	s__Limivicinus sp900317375	455.926	471.845	469.521	342.828	386.615	343.22	326.274	325.5	281.297	257.977	261.811	358.096
RGMC.20611	d__Bacteria	p__Bacillota_A	c__Clostridia	o__Oscillospirales	f__Oscillospiraceae	g__Limivicinus	s__Limivicinus sp900317375	418.221	451.671	453.766	395.352	398.074	356.925	325.475	321.141	263.001	251.96	231.249	317.401
RGMC.22343	d__Bacteria	p__Bacillota_A	c__Clostridia	o__Oscillospirales	f__Oscillospiraceae	g__Limivicinus	s__Limivicinus sp900319465	0	5885.38	6541.27	3522.15	2708.01	5177.28	4954.04	3702.93	3106.46	2575.07	1459.43	5708.2
RGMC.2285	d__Bacteria	p__Bacillota_A	c__Clostridia	o__Oscillospirales	f__Oscillospiraceae	g__Limivicinus	s__Limivicinus sp900319695	0	663.039	0	0	443.378	0	802.947	840.707	552.063	612.203	302.245	627.719
RGMC.3057	d__Bacteria	p__Bacillota_A	c__Clostridia	o__Oscillospirales	f__Oscillospiraceae	g__Limivicinus	s__Limivicinus sp900319695	0	0	0	0	0	0	755.857	785.199	544.647	596.977	329.046	624.175
RGMC.21550	d__Bacteria	p__Bacillota_A	c__Clostridia	o__Oscillospirales	f__Oscillospiraceae	g__Limivicinus	s__Limivicinus sp900319695	0	0	0	0	0	0	666.652	691.601	460.596	541.181	282.667	536.017
RGMC.21640	d__Bacteria	p__Bacillota_A	c__Clostridia	o__Oscillospirales	f__Oscillospiraceae	g__Limivicinus	s__Limivicinus sp900319695	0	383.787	0	0	0	0	415.793	434.147	319.744	356.663	254.927	365.115
RGMC.20671	d__Bacteria	p__Bacillota_A	c__Clostridia	o__Oscillospirales	f__Oscillospiraceae	g__Limivicinus	s__Limivicinus sp900319695	0	313.257	0	0	239.21	0	371.918	377.953	279.012	303.083	223.063	286.696
RGMC.21222	d__Bacteria	p__Bacillota_A	c__Clostridia	o__Oscillospirales	f__Oscillospiraceae	g__Limivicinus	s__Limivicinus sp900319695	0	0	0	0	0	0	402.784	413.249	297.662	334.925	233.83	303.339
RGMC.20062	d__Bacteria	p__Bacillota_A	c__Clostridia	o__Oscillospirales	f__Oscillospiraceae	g__Limivicinus	s__Limivicinus sp900319695	0	0	0	0	0	0	343.445	335.597	246.761	258.905	192.049	237.907
RGMC.20168	d__Bacteria	p__Bacillota_A	c__Clostridia	o__Oscillospirales	f__Oscillospiraceae	g__Limivicinus	s__Limivicinus sp900319695	0	0	0	0	0	0	320.64	328.62	236.785	278.42	192.398	251.685
RGMC.19388	d__Bacteria	p__Bacillota_A	c__Clostridia	o__Oscillospirales	f__Oscillospiraceae	g__Limivicinus	s__Limivicinus sp902778275	1031.98	973.075	1018.11	713.638	683.359	793.704	883.308	900.207	798.438	668.055	669.334	852.046
RGMC.23869	d__Bacteria	p__Bacillota_A	c__Clostridia	o__Oscillospirales	f__Oscillospiraceae	g__Limivicinus	s__Limivicinus sp902778285	985.689	1221.24	1318.37	717.513	594.938	1023.01	1001.28	804.049	760.347	562.496	463.39	1169.28
RGMC.11058	d__Bacteria	p__Bacillota_A	c__Clostridia	o__Oscillospirales	f__Oscillospiraceae	g__Limivicinus	s__Limivicinus sp902778285	798.382	996.809	1045.83	591.104	505.373	809.87	818.034	679.607	643.173	481.965	414.835	944.538
RGMC.19386	d__Bacteria	p__Bacillota_A	c__Clostridia	o__Oscillospirales	f__Oscillospiraceae	g__Limivicinus	s__Limivicinus sp902778285	812.209	1005.15	1064.54	591.158	507.589	819.348	837.612	682.547	636.997	475.985	396.177	947.404
RGMC.29446	d__Bacteria	p__Bacillota_A	c__Clostridia	o__Oscillospirales	f__Oscillospiraceae	g__Limivicinus	s__Limivicinus sp902789835	596.591	981.115	1055.59	801.058	620.498	839.12	562.479	596.128	417.569	419.337	296.452	571.428
RGMC.29550	d__Bacteria	p__Bacillota_A	c__Clostridia	o__Oscillospirales	f__Oscillospiraceae	g__Limivicinus	s__Limivicinus sp902789835	228.928	327.196	310.151	236.667	277.789	256.663	256.04	255.107	249.609	215.878	240.266	248.049
RGMC.11013	d__Bacteria	p__Bacillota_A	c__Clostridia	o__Oscillospirales	f__Oscillospiraceae	g__Limivicinus	s__Limivicinus sp902799075	0	0	0	0	0	0	0	0	0	0	0	0
RGMC.21606	d__Bacteria	p__Bacillota_A	c__Clostridia	o__Oscillospirales	f__Oscillospiraceae	g__Limivicinus	s__Limivicinus sp902802215	0	2144.74	0	1716.85	1571.9	2075.42	1888.79	1493.49	1716.15	1242.37	1173.5	1683.02
RGMC.20469	d__Bacteria	p__Bacillota_A	c__Clostridia	o__Oscillospirales	f__Oscillospiraceae	g__Limivicinus	s__Limivicinus sp902802215	0	519.143	0	0	479.544	421.496	546.031	481.645	569.122	417.493	516.744	398.41
RGMC.28807	d__Bacteria	p__Bacillota_A	c__Clostridia	o__Oscillospirales	f__Oscillospiraceae	g__Oscillibacter	s__Oscillibacter ruminantium	0	0	0	0	0	0	0	0	0	0	0	0
RGMC.14267	d__Bacteria	p__Bacillota_A	c__Clostridia	o__Oscillospirales	f__Oscillospiraceae	g__RGIG529	s__RGIG529 sp017420125	0	0	0	0	0	0	1678.03	1805.32	1366.21	1936.16	1056.84	2174.95
RGMC.14557	d__Bacteria	p__Bacillota_A	c__Clostridia	o__Oscillospirales	f__Oscillospiraceae	g__RGIG5705	s__RGIG5705 sp017515345	592.031	550.778	574.429	427.758	427.76	433.284	316.283	320.571	304.028	263.645	288.123	385.472
RGMC.220	d__Bacteria	p__Bacillota_A	c__Clostridia	o__Oscillospirales	f__Oscillospiraceae	g__RGIG6375	s__RGIG6375 sp016290695	219.416	166.187	0	224.026	228.937	232.199	644.281	468.605	690.095	469.772	756.458	414.601
RGMC.27200	d__Bacteria	p__Bacillota_A	c__Clostridia	o__Oscillospirales	f__Oscillospiraceae	g__RGIG7114	s__	0	0	0	0	0	0	0	0	0	0	189.729	0
RGMC.12785	d__Bacteria	p__Bacillota_A	c__Clostridia	o__Oscillospirales	f__Oscillospiraceae	g__RGIG7114	s__RGIG7114 sp017445985	259.865	0	0	0	0	0	0	0	0	0	0	0
RGMC.40372	d__Bacteria	p__Bacillota_A	c__Clostridia	o__Oscillospirales	f__Oscillospiraceae	g__RGIG7114	s__RGIG7114 sp017445985	179.504	0	0	0	0	0	0	0	0	0	0	0
RGMC.40422	d__Bacteria	p__Bacillota_A	c__Clostridia	o__Oscillospirales	f__Oscillospiraceae	g__RGIG7114	s__RGIG7114 sp946407675	209.418	161.282	0	0	172.65	0	0	0	164.245	0	186.455	0
RGMC.15496	d__Bacteria	p__Bacillota_A	c__Clostridia	o__Oscillospirales	f__Oscillospiraceae	g__RGIG7949	s__RGIG7949 sp016287555	122.659	0	0	0	0	0	0	0	0	0	0	0
RGMC.3855	d__Bacteria	p__Bacillota_A	c__Clostridia	o__Oscillospirales	f__Oscillospiraceae	g__RGIG8048	s__RGIG8048 sp947306975	0	165.213	0	0	0	140.317	0	0	0	0	0	0
RGMC.97	d__Bacteria	p__Bacillota_A	c__Clostridia	o__Oscillospirales	f__Oscillospiraceae	g__RUG626	s__RUG626 sp016286595	0	398.383	499.809	503.967	416.531	551.334	1133.76	580.811	708.227	666.755	541.241	686.01
RGMC.14516	d__Bacteria	p__Bacillota_A	c__Clostridia	o__Oscillospirales	f__Oscillospiraceae	g__SIG488	s__SIG488 sp017516005	330.171	310.577	335.579	300.51	294.944	296.742	271.921	246.262	231.075	238.099	244.19	252.604
RGMC.27272	d__Bacteria	p__Bacillota_A	c__Clostridia	o__Oscillospirales	f__Oscillospiraceae	g__UBA1774	s__	361.152	393.687	396.816	367.951	394.796	321.585	444.957	443.487	326.715	406.74	338.312	369.032
RGMC.27510	d__Bacteria	p__Bacillota_A	c__Clostridia	o__Oscillospirales	f__Oscillospiraceae	g__UBA1774	s__	0	0	0	0	0	178.323	0	0	0	0	0	0
RGMC.100	d__Bacteria	p__Bacillota_A	c__Clostridia	o__Oscillospirales	f__Oscillospiraceae	g__UBA1774	s__UBA1774 sp016286665	871.415	961.411	1070.94	841.895	940.231	846.249	588.18	754.928	381.853	629.648	439.282	481.527
RGMC.15298	d__Bacteria	p__Bacillota_A	c__Clostridia	o__Oscillospirales	f__Oscillospiraceae	g__UBA1774	s__UBA1774 sp017535635	543.604	554.957	558.715	534.252	566.606	445.484	506.45	582.36	359.005	529.474	393.36	437.144
RGMC.39104	d__Bacteria	p__Bacillota_A	c__Clostridia	o__Oscillospirales	f__Oscillospiraceae	g__UBA1774	s__UBA1774 sp017545325	1250.93	1096.35	1134.53	973.274	1055.05	941.865	970.695	924.338	868.89	871.057	882.756	974.463
RGMC.16249	d__Bacteria	p__Bacillota_A	c__Clostridia	o__Oscillospirales	f__Oscillospiraceae	g__UBA1774	s__UBA1774 sp017617795	359.322	329.371	314.081	284.992	316.589	262.609	195.038	232.956	175.134	199.936	198.953	189.036
RGMC.37978	d__Bacteria	p__Bacillota_A	c__Clostridia	o__Oscillospirales	f__Oscillospiraceae	g__UBA1774	s__UBA1774 sp902795345	320.976	263.824	282.162	219.865	249.394	233.215	230.439	238.778	188.88	0	193.554	220.004
RGMC.38014	d__Bacteria	p__Bacillota_A	c__Clostridia	o__Oscillospirales	f__Oscillospiraceae	g__UBA1774	s__UBA1774 sp902795345	275.699	235.717	254.666	198.268	217.69	208.189	198.279	213.689	166.588	177.042	166.133	193.175
RGMC.37975	d__Bacteria	p__Bacillota_A	c__Clostridia	o__Oscillospirales	f__Oscillospiraceae	g__UBA1774	s__UBA1774 sp902795345	256.682	230.1	250.952	188.669	206.827	200.299	185.828	200.854	149.235	0	153.806	171.249
RGMC.38012	d__Bacteria	p__Bacillota_A	c__Clostridia	o__Oscillospirales	f__Oscillospiraceae	g__UBA1774	s__UBA1774 sp902795345	257.029	223.653	232.034	175.166	187.576	190.524	177.025	182.159	138.312	0	137.543	167.519
RGMC.1730	d__Bacteria	p__Bacillota_A	c__Clostridia	o__Oscillospirales	f__Oscillospiraceae	g__UBA1774	s__UBA1774 sp902795345	239.445	208.129	0	0	0	176.543	0	0	0	0	0	162.955
RGMC.40098	d__Bacteria	p__Bacillota_A	c__Clostridia	o__Oscillospirales	f__Oscillospiraceae	g__UBA1774	s__UBA1774 sp947307505	797.379	760.537	733.22	643.549	717.034	621.308	421.216	494.81	391.755	446.023	421.155	467.155
RGMC.26933	d__Bacteria	p__Bacillota_A	c__Clostridia	o__Oscillospirales	f__Oscillospiraceae	g__UBA738	s__	0	0	0	0	0	0	788.679	574.243	765.988	452.727	666.739	559.015
RGMC.12001	d__Bacteria	p__Bacillota_A	c__Clostridia	o__Oscillospirales	f__Oscillospiraceae	g__UBA738	s__UBA738 sp017411265	709.423	582.005	642.477	460.141	411.048	436.381	421.152	372.303	375.751	272.501	302.17	432.143
RGMC.15390	d__Bacteria	p__Bacillota_A	c__Clostridia	o__Oscillospirales	f__Oscillospiraceae	g__UBA738	s__UBA738 sp017541825	0	262.112	0	224.787	0	242.13	329.147	0	351.175	0	347.601	278.3
RGMC.22344	d__Bacteria	p__Bacillota_A	c__Clostridia	o__Oscillospirales	f__Oscillospiraceae	g__UBA738	s__UBA738 sp902768805	475.188	639.021	725.331	483.189	435.936	554.76	1436.48	1024.62	1563.91	765.116	1215.34	1205.31
RGMC.12291	d__Bacteria	p__Bacillota_A	c__Clostridia	o__Oscillospirales	f__Oscillospiraceae	g__Vescimonas	s__Vescimonas sp017427645	0	0	0	0	0	0	0	0	0	0	0	0
RGMC.12379	d__Bacteria	p__Bacillota_A	c__Clostridia	o__Oscillospirales	f__QAMX01	g__RUG11797	s__RUG11797 sp017441705	271.566	267.702	262.594	233.479	247.382	212.394	193.678	199.446	248.368	179.141	277.85	201.748
RGMC.62	d__Bacteria	p__Bacillota_A	c__Clostridia	o__Oscillospirales	f__QAMX01	g__SIG499	s__SIG499 sp016285815	405.328	172.893	163.761	137.203	165.31	118.003	0	0	0	0	0	0
RGMC.14508	d__Bacteria	p__Bacillota_A	c__Clostridia	o__Oscillospirales	f__RGIG577	g__RGIG577	s__RGIG577 sp017513095	1636.47	1393.87	1482.14	1507.17	1713.78	1170.01	1283.74	827.415	1273.36	1065.68	1678	1029.97
RGMC.2138	d__Bacteria	p__Bacillota_A	c__Clostridia	o__Oscillospirales	f__Ruminococcaceae	g__Hominimerdicola	s__Hominimerdicola alba_A	0	349.309	353.808	269.795	0	288.607	417.418	520.458	394.421	321.48	427.189	281.389
RGMC.9899	d__Bacteria	p__Bacillota_A	c__Clostridia	o__Oscillospirales	f__Ruminococcaceae	g__Hominimerdicola	s__Hominimerdicola alba_A	0	479.959	502.234	0	0	366.866	491.511	634.895	447.879	418.441	549.147	0
RGMC.12846	d__Bacteria	p__Bacillota_A	c__Clostridia	o__Oscillospirales	f__Ruminococcaceae	g__Hominimerdicola	s__Hominimerdicola alba_A	0	263.809	252.275	0	0	213.708	290.873	396.557	285.717	260.16	355.179	205.777
RGMC.20005	d__Bacteria	p__Bacillota_A	c__Clostridia	o__Oscillospirales	f__Ruminococcaceae	g__Hominimerdicola	s__Hominimerdicola alba_A	0	330.38	0	0	0	258.976	363.169	471.454	348.058	0	436.278	0
RGMC.18728	d__Bacteria	p__Bacillota_A	c__Clostridia	o__Oscillospirales	f__Ruminococcaceae	g__Hominimerdicola	s__Hominimerdicola alba_A	0	230.968	219.046	0	0	186.27	264.358	338.697	251.348	221.737	298.728	181.178
RGMC.18062	d__Bacteria	p__Bacillota_A	c__Clostridia	o__Oscillospirales	f__Ruminococcaceae	g__Hominimerdicola	s__Hominimerdicola alba_A	0	295.123	0	0	0	233.082	329.125	426.246	308.726	0	325.35	0
RGMC.1741	d__Bacteria	p__Bacillota_A	c__Clostridia	o__Oscillospirales	f__Ruminococcaceae	g__Huintestinicola	s__Huintestinicola sp017394475	0	0	0	0	0	0	0	0	0	0	0	0
RGMC.27529	d__Bacteria	p__Bacillota_A	c__Clostridia	o__Oscillospirales	f__Ruminococcaceae	g__HUN007	s__	0	0	0	0	0	0	0	0	0	0	0	0
RGMC.20179	d__Bacteria	p__Bacillota_A	c__Clostridia	o__Oscillospirales	f__Ruminococcaceae	g__HUN007	s__HUN007 sp000712055	0	0	0	0	0	0	0	0	0	0	0	0
RGMC.12347	d__Bacteria	p__Bacillota_A	c__Clostridia	o__Oscillospirales	f__Ruminococcaceae	g__HUN007	s__HUN007 sp017438745	2020.79	1826.4	2453.37	1838.48	1906.59	1920	2390.32	3032.82	2350.1	3068.68	2184.48	2005.63
RGMC.3862	d__Bacteria	p__Bacillota_A	c__Clostridia	o__Oscillospirales	f__Ruminococcaceae	g__HUN007	s__HUN007 sp017438745	1512.25	1469.22	1975.32	1446.53	1424.54	1534.76	1872.73	2425.38	1822.58	2357.03	1629.51	1539.13
RGMC.2562	d__Bacteria	p__Bacillota_A	c__Clostridia	o__Oscillospirales	f__Ruminococcaceae	g__HUN007	s__HUN007 sp902789705	476.614	410.038	554.213	414.79	421.835	458.436	535.775	689.794	505.661	661.43	469.768	430.632
RGMC.20479	d__Bacteria	p__Bacillota_A	c__Clostridia	o__Oscillospirales	f__Ruminococcaceae	g__HUN007	s__HUN007 sp902789705	383.346	348.624	482.719	332.494	357.895	351.095	424.188	564.784	433.938	566.352	414.527	370.33
RGMC.16429	d__Bacteria	p__Bacillota_A	c__Clostridia	o__Oscillospirales	f__Ruminococcaceae	g__RGIG1955	s__RGIG1955 sp017400345	15864.1	11792.5	13776.3	13568.9	11182.5	13233.8	8110.93	10403.5	5658.07	8895.12	4088.53	10636.8
RGMC.11656	d__Bacteria	p__Bacillota_A	c__Clostridia	o__Oscillospirales	f__Ruminococcaceae	g__RGIG1955	s__RGIG1955 sp017414435	1249.76	1029.14	1231.33	1264.51	1167.11	1093.33	730.402	930.339	585.543	925.103	497.7	1147.84
RGMC.14530	d__Bacteria	p__Bacillota_A	c__Clostridia	o__Oscillospirales	f__Ruminococcaceae	g__RGIG5675	s__RGIG5675 sp017512745	0	0	0	0	0	0	0	0	100.197	0	0	0
RGMC.14536	d__Bacteria	p__Bacillota_A	c__Clostridia	o__Oscillospirales	f__Ruminococcaceae	g__RGIG5675	s__RGIG5675 sp017512745	0	0	0	0	0	0	0	0	81.7803	0	0	0
RGMC.11941	d__Bacteria	p__Bacillota_A	c__Clostridia	o__Oscillospirales	f__Ruminococcaceae	g__RUG11783	s__RUG11783 sp017405465	172.875	153.967	152.112	145.383	157.218	134.13	170.776	150.724	223.384	174.895	262.956	186.814
RGMC.29317	d__Bacteria	p__Bacillota_A	c__Clostridia	o__Oscillospirales	f__Ruminococcaceae	g__RUG11783	s__RUG11783 sp902772615	702.45	633.766	698.22	580.415	516.066	561.607	597.367	456.421	699.503	428.564	726.912	590.275
RGMC.16901	d__Bacteria	p__Bacillota_A	c__Clostridia	o__Oscillospirales	f__Ruminococcaceae	g__RUG11783	s__RUG11783 sp902772615	545.638	501.561	529.109	469.01	416.013	440.716	490.572	375.448	577.286	361.439	601.628	451.597
RGMC.18849	d__Bacteria	p__Bacillota_A	c__Clostridia	o__Oscillospirales	f__Ruminococcaceae	g__RUG11783	s__RUG11783 sp902772615	453.514	431.101	469.805	423.738	379.913	398.419	457.246	335.029	526.872	345.321	570.918	412.114
RGMC.3605	d__Bacteria	p__Bacillota_A	c__Clostridia	o__Oscillospirales	f__Ruminococcaceae	g__Ruminiclostridium_E	s__Ruminiclostridium_E sp947168885	0	129.458	0	0	0	0	0	207.323	0	0	0	0
RGMC.10759	d__Bacteria	p__Bacillota_A	c__Clostridia	o__Oscillospirales	f__Ruminococcaceae	g__Ruminococcus	s__	2750.95	1572.29	1459.35	1164.65	1314.79	1252.42	257.233	480.102	0	339.282	0	307.685
RGMC.27492	d__Bacteria	p__Bacillota_A	c__Clostridia	o__Oscillospirales	f__Ruminococcaceae	g__Ruminococcus	s__	2073.76	1269.73	1131.94	904.068	1072.59	906.324	0	354.801	0	257.756	0	236.874
RGMC.20099	d__Bacteria	p__Bacillota_A	c__Clostridia	o__Oscillospirales	f__Ruminococcaceae	g__Ruminococcus	s__Ruminococcus flavefaciens_C	642.048	707.498	724.118	537.401	530.443	543.159	324.748	478.364	310.333	345.028	275.057	320.068
RGMC.20041	d__Bacteria	p__Bacillota_A	c__Clostridia	o__Oscillospirales	f__Ruminococcaceae	g__Ruminococcus	s__Ruminococcus flavefaciens_F	1122.7	1095.49	1011.67	755.018	961.924	782.581	244.693	452.543	230.444	312.916	227.452	296.959
RGMC.12220	d__Bacteria	p__Bacillota_A	c__Clostridia	o__Oscillospirales	f__Ruminococcaceae	g__Ruminococcus	s__Ruminococcus sp001604035	470.509	385.499	438.648	324.238	349.166	370.291	0	0	0	0	0	0
RGMC.228	d__Bacteria	p__Bacillota_A	c__Clostridia	o__Oscillospirales	f__Ruminococcaceae	g__Ruminococcus	s__Ruminococcus sp016290875	590.244	862.939	897.703	702.328	729.742	667.447	886.857	894.596	868.88	783.155	1042.82	667.319
RGMC.12393	d__Bacteria	p__Bacillota_A	c__Clostridia	o__Oscillospirales	f__Ruminococcaceae	g__Ruminococcus	s__Ruminococcus sp017441505	0	0	0	0	0	0	0	210.895	0	0	0	0
RGMC.15338	d__Bacteria	p__Bacillota_A	c__Clostridia	o__Oscillospirales	f__Ruminococcaceae	g__Ruminococcus	s__Ruminococcus sp017534835	360.231	793.447	863.51	680.705	830.837	662.673	222.764	373.103	161.596	302.562	148.537	280.971
RGMC.10041	d__Bacteria	p__Bacillota_A	c__Clostridia	o__Oscillospirales	f__UMGS1384	g__CALWJF01	s__	967.341	1025.04	1158.03	875.936	824.061	923.304	1034.56	992.197	961.437	827.536	857.751	931.143
RGMC.11072	d__Bacteria	p__Bacillota_A	c__Clostridia	o__Peptostreptococcales	f__Anaerovoracaceae	g__Eubacterium_B	s__Eubacterium_B sp017437565	262.508	224.185	231.926	182.275	184.942	173.921	166.962	163.539	186.729	150.232	187.722	222.521
RGMC.12413	d__Bacteria	p__Bacillota_A	c__Clostridia	o__Peptostreptococcales	f__Anaerovoracaceae	g__Eubacterium_B	s__Eubacterium_B sp017437565	254.436	221.579	226.521	177.303	186.107	170.337	167.069	159.791	187.356	142.849	182.907	207.275
RGMC.14641	d__Bacteria	p__Bacillota_A	c__Clostridia	o__Peptostreptococcales	f__Anaerovoracaceae	g__Eubacterium_B	s__Eubacterium_B sp017515765	0	0	0	0	0	0	0	0	0	0	118.842	0
RGMC.595	d__Bacteria	p__Bacillota_A	c__Clostridia	o__Peptostreptococcales	f__Anaerovoracaceae	g__Eubacterium_B	s__Eubacterium_B sp017515765	0	0	0	0	0	0	0	0	0	0	0	0
RGMC.27356	d__Bacteria	p__Bacillota_A	c__Clostridia	o__Peptostreptococcales	f__Anaerovoracaceae	g__Eubacterium_T	s__	332.505	346.781	384.986	303.061	297.302	305.047	0	0	0	0	154.808	0
RGMC.1041	d__Bacteria	p__Bacillota_A	c__Clostridia	o__Peptostreptococcales	f__Anaerovoracaceae	g__Eubacterium_T	s__Eubacterium_T sp900318155	0	351.989	725.279	698.882	415.805	478.478	286.813	342.249	323.362	375.153	397.326	624.452
RGMC.37261	d__Bacteria	p__Bacillota_A	c__Clostridia	o__Peptostreptococcales	f__Anaerovoracaceae	g__Eubacterium_T	s__Eubacterium_T sp900318155	0	98.1921	306.618	258.17	98.8099	181.648	105.333	127.357	85.4232	147.204	99.1726	302.279
RGMC.10483	d__Bacteria	p__Bacillota_A	c__Clostridia	o__Peptostreptococcales	f__Anaerovoracaceae	g__Hornefia	s__	325.993	318.571	364.071	283.514	271.393	289.245	0	185.033	0	147.933	0	203.105
RGMC.5999	d__Bacteria	p__Bacillota_A	c__Clostridia	o__Peptostreptococcales	f__Anaerovoracaceae	g__JABZIP01	s__	0	0	0	0	0	0	0	0	0	0	0	0
RGMC.492	d__Bacteria	p__Bacillota_A	c__Clostridia	o__Peptostreptococcales	f__Anaerovoracaceae	g__JAILLO01	s__JAILLO01 sp024693105	0	0	0	0	0	0	0	0	706.381	0	822.984	0
RGMC.37702	d__Bacteria	p__Bacillota_A	c__Clostridia	o__Peptostreptococcales	f__Anaerovoracaceae	g__Lentihominibacter	s__	9054.33	5719.36	5917.38	5923.78	6255.23	4698.07	2693.03	2532.07	2563.27	2622.04	2947.29	5240.53
RGMC.10960	d__Bacteria	p__Bacillota_A	c__Clostridia	o__Peptostreptococcales	f__Anaerovoracaceae	g__Lentihominibacter	s__	4159.97	3668.44	3816.3	3462.35	4070.67	3234.28	2511.79	3020.56	2635.51	3023.35	3048.82	3604.47
RGMC.37848	d__Bacteria	p__Bacillota_A	c__Clostridia	o__Peptostreptococcales	f__Anaerovoracaceae	g__Lentihominibacter	s__	1038.03	1054.29	1110.78	806.862	901.866	875.581	538.118	533.082	605.993	496.839	679.662	803.672
RGMC.1805	d__Bacteria	p__Bacillota_A	c__Clostridia	o__Peptostreptococcales	f__Anaerovoracaceae	g__Lentihominibacter	s__	545.365	513.878	558.047	438.368	472.601	457.863	268.681	319.058	313.794	255.34	324.009	371.138
RGMC.10509	d__Bacteria	p__Bacillota_A	c__Clostridia	o__Peptostreptococcales	f__Anaerovoracaceae	g__Lentihominibacter	s__	513.94	392.242	449.726	307.313	315.378	342.294	0	0	219.206	0	211.546	306.591
RGMC.1782	d__Bacteria	p__Bacillota_A	c__Clostridia	o__Peptostreptococcales	f__Anaerovoracaceae	g__Lentihominibacter	s__Lentihominibacter sp002310095	7752.54	10336.5	9931.76	10579.6	12091.8	9821.09	8277.54	8059.17	8504.87	8447.79	10997.2	11012.7
RGMC.17911	d__Bacteria	p__Bacillota_A	c__Clostridia	o__Peptostreptococcales	f__Anaerovoracaceae	g__Lentihominibacter	s__Lentihominibacter sp015058145	1620.08	1458.13	1536.6	1231	1404.64	1225.86	740.743	773.941	852.66	695.745	1001.25	1071.39
RGMC.17943	d__Bacteria	p__Bacillota_A	c__Clostridia	o__Peptostreptococcales	f__Anaerovoracaceae	g__Lentihominibacter	s__Lentihominibacter sp015058205	752.203	681.224	736.813	552.624	611.552	564.56	344.551	357.491	387.886	328.31	460.75	548.875
RGMC.11983	d__Bacteria	p__Bacillota_A	c__Clostridia	o__Peptostreptococcales	f__Anaerovoracaceae	g__Lentihominibacter	s__Lentihominibacter sp017404365	591.676	593.662	626.218	549.46	617.357	534.8	332.532	371.809	376.629	362.676	469.285	458.261
RGMC.10494	d__Bacteria	p__Bacillota_A	c__Clostridia	o__Peptostreptococcales	f__Anaerovoracaceae	g__Lentihominibacter	s__Lentihominibacter sp017404365	513.199	555.739	578.068	538.16	613.244	497.462	316.202	367.62	362.646	364.989	460.776	424.864
RGMC.8614	d__Bacteria	p__Bacillota_A	c__Clostridia	o__Peptostreptococcales	f__Anaerovoracaceae	g__Lentihominibacter	s__Lentihominibacter sp017404365	518.724	558.688	562.229	526.858	611.193	488.073	317.543	360.8	357.609	355.9	457.979	421.946
RGMC.10482	d__Bacteria	p__Bacillota_A	c__Clostridia	o__Peptostreptococcales	f__Anaerovoracaceae	g__Lentihominibacter	s__Lentihominibacter sp017431395	0	343.521	0	279.313	0	0	219.789	0	224.006	178.533	247.767	302.196
RGMC.2275	d__Bacteria	p__Bacillota_A	c__Clostridia	o__Peptostreptococcales	f__Anaerovoracaceae	g__Lentihominibacter	s__Lentihominibacter sp017431395	0	105.99	0	0	0	0	105.654	0	129.927	102.919	191.997	128.191
RGMC.12132	d__Bacteria	p__Bacillota_A	c__Clostridia	o__Peptostreptococcales	f__Anaerovoracaceae	g__Lentihominibacter	s__Lentihominibacter sp017431395	0	0	0	0	0	0	174.26	0	178.826	0	181.38	207.736
RGMC.12095	d__Bacteria	p__Bacillota_A	c__Clostridia	o__Peptostreptococcales	f__Anaerovoracaceae	g__Lentihominibacter	s__Lentihominibacter sp017432345	441.506	426.443	433.124	386.649	419.058	381.699	219.738	275.25	250.292	236.111	286.335	284.194
RGMC.12363	d__Bacteria	p__Bacillota_A	c__Clostridia	o__Peptostreptococcales	f__Anaerovoracaceae	g__Lentihominibacter	s__Lentihominibacter sp017438285	3859.53	3695.92	3710.52	3684.12	4637.38	3327.55	2588.5	3258.19	2824.45	3466.69	3526.9	3491.75
RGMC.20472	d__Bacteria	p__Bacillota_A	c__Clostridia	o__Peptostreptococcales	f__Anaerovoracaceae	g__Lentihominibacter	s__Lentihominibacter sp902763505	798.314	657.075	724.037	541.054	581.811	551.482	324.174	341.096	347.764	319.582	402.654	506.161
RGMC.37915	d__Bacteria	p__Bacillota_A	c__Clostridia	o__Peptostreptococcales	f__Anaerovoracaceae	g__Lentihominibacter	s__Lentihominibacter sp902763505	704.283	623.005	686.418	556.916	597.424	538.568	345.371	364.613	374.379	343.766	437.528	502.221
RGMC.20289	d__Bacteria	p__Bacillota_A	c__Clostridia	o__Peptostreptococcales	f__Anaerovoracaceae	g__Lentihominibacter	s__Lentihominibacter sp902787725	498.384	548.059	545.383	532.747	601.247	491.995	337.341	379.083	372.431	380.676	484.875	424.604
RGMC.21138	d__Bacteria	p__Bacillota_A	c__Clostridia	o__Peptostreptococcales	f__Anaerovoracaceae	g__Lentihominibacter	s__Lentihominibacter sp902796875	498.934	794.576	763.475	726.843	635.144	634.021	508.214	452.798	469.303	380.493	459.25	664.069
RGMC.12037	d__Bacteria	p__Bacillota_A	c__Clostridia	o__Peptostreptococcales	f__Anaerovoracaceae	g__RGIG2439	s__RGIG2439 sp017433975	226.633	219.02	225.666	187.26	190.954	187.451	219.284	177.55	296.06	160.542	304.664	229.622
RGMC.210	d__Bacteria	p__Bacillota_A	c__Clostridia	o__Peptostreptococcales	f__Anaerovoracaceae	g__RGIG2707	s__RGIG2707 sp016281165	283.826	236.196	244.204	211.163	197.566	189.333	0	0	0	0	0	0
RGMC.17606	d__Bacteria	p__Bacillota_A	c__Clostridia	o__Peptostreptococcales	f__Anaerovoracaceae	g__RGIG2707	s__RGIG2707 sp017417045	0	0	0	0	0	0	0	0	236.145	316.254	264.645	280.683
RGMC.27195	d__Bacteria	p__Bacillota_A	c__Clostridia	o__Peptostreptococcales	f__Anaerovoracaceae	g__RGIG5755	s__	1511.45	1838.79	1816.91	2040.77	2365.2	1589.32	1039.44	1204.13	1445.61	1162.34	2066.9	1410.6
RGMC.2142	d__Bacteria	p__Bacillota_A	c__Clostridia	o__Peptostreptococcales	f__Anaerovoracaceae	g__RGIG5755	s__	1474.42	1361.15	1555.28	1160.63	1151.24	1192.61	939.748	999.317	1147.13	683.007	945.701	1184.73
RGMC.10477	d__Bacteria	p__Bacillota_A	c__Clostridia	o__Peptostreptococcales	f__Anaerovoracaceae	g__RGIG5755	s__	0	0	0	0	0	0	0	0	0	0	304.96	0
RGMC.14597	d__Bacteria	p__Bacillota_A	c__Clostridia	o__Peptostreptococcales	f__Anaerovoracaceae	g__RGIG5755	s__RGIG5755 sp017533915	1811.37	1847.49	1950.76	1989.72	2191.13	1630.1	1157.21	1204.97	1362.78	1167.89	1714.75	1544.91
RGMC.15467	d__Bacteria	p__Bacillota_A	c__Clostridia	o__Peptostreptococcales	f__Anaerovoracaceae	g__RGIG7041	s__	1761.72	1443.58	1232.63	1523.26	1599.91	1199.1	1288.25	1126.54	1094.55	1587.89	1114.28	1483.77
RGMC.15521	d__Bacteria	p__Bacillota_A	c__Clostridia	o__Peptostreptococcales	f__Anaerovoracaceae	g__RGIG7041	s__RGIG7041 sp017543805	453.002	452.376	434.759	390.211	420.297	422.306	665.983	546.896	573.788	603.121	588.715	647.51
RGMC.37267	d__Bacteria	p__Bacillota_A	c__Clostridia	o__Peptostreptococcales	f__Anaerovoracaceae	g__RGIG7041	s__RGIG7041 sp017543805	361.518	358.769	360.273	305.682	362.667	353.673	604.55	481.518	526.017	545.948	554.333	583.707
RGMC.11898	d__Bacteria	p__Bacillota_A	c__Clostridia	o__Peptostreptococcales	f__Anaerovoracaceae	g__RGIG7111	s__	805.948	534.668	582.777	428.553	433.257	461.318	0	0	0	0	0	0
RGMC.15566	d__Bacteria	p__Bacillota_A	c__Clostridia	o__Peptostreptococcales	f__Anaerovoracaceae	g__RGIG7111	s__RGIG7111 sp017538845	537.765	434.749	439.096	445.967	498.534	381.418	168.113	206.347	185.789	0	206.425	243.725
RGMC.14465	d__Bacteria	p__Bacillota_A	c__Clostridia	o__Peptostreptococcales	f__Anaerovoracaceae	g__RGIG7111	s__RGIG7111 sp030530305	659.682	490.079	509.406	510.708	560.79	427.091	0	0	0	0	0	248.299
RGMC.2205	d__Bacteria	p__Bacillota_A	c__Clostridia	o__Peptostreptococcales	f__Anaerovoracaceae	g__RUG099	s__	677.564	679.362	725.785	677.181	629.193	695.195	907.791	686.398	666.938	529.609	485.252	1239.72
RGMC.2387	d__Bacteria	p__Bacillota_A	c__Clostridia	o__Peptostreptococcales	f__Anaerovoracaceae	g__RUG099	s__	0	503.155	483.203	621.392	662.712	529.186	683.848	475.189	668.44	512.123	588.037	901.922
RGMC.31112	d__Bacteria	p__Bacillota_A	c__Clostridia	o__Peptostreptococcales	f__Anaerovoracaceae	g__RUG099	s__	242.733	269.864	288.201	281.406	242.809	281.083	392.581	250.719	440.558	214.978	287.75	464.614
RGMC.10537	d__Bacteria	p__Bacillota_A	c__Clostridia	o__Peptostreptococcales	f__Anaerovoracaceae	g__RUG099	s__	217.845	237.52	233.731	255.47	238.632	229.653	275.973	209.97	302.118	198.009	231.159	358.93
RGMC.38056	d__Bacteria	p__Bacillota_A	c__Clostridia	o__Peptostreptococcales	f__Anaerovoracaceae	g__RUG099	s__	289.856	212.254	246.395	188.13	181.654	204.133	0	0	0	0	0	143.719
RGMC.37450	d__Bacteria	p__Bacillota_A	c__Clostridia	o__Peptostreptococcales	f__Anaerovoracaceae	g__RUG099	s__	0	145.063	0	153.001	179.642	131.766	0	0	0	0	0	0
RGMC.37929	d__Bacteria	p__Bacillota_A	c__Clostridia	o__Peptostreptococcales	f__Anaerovoracaceae	g__RUG099	s__	0	187.189	0	0	0	159.678	0	0	0	0	0	0
RGMC.10459	d__Bacteria	p__Bacillota_A	c__Clostridia	o__Peptostreptococcales	f__Anaerovoracaceae	g__RUG099	s__RUG099 sp015058065	476.771	342.274	416.764	262.547	281.688	285.456	0	0	0	0	0	290.477
RGMC.17859	d__Bacteria	p__Bacillota_A	c__Clostridia	o__Peptostreptococcales	f__Anaerovoracaceae	g__RUG099	s__RUG099 sp015058065	226.689	162.118	168.993	136.417	136.244	138.979	0	0	0	0	0	0
RGMC.11928	d__Bacteria	p__Bacillota_A	c__Clostridia	o__Peptostreptococcales	f__Anaerovoracaceae	g__RUG099	s__RUG099 sp017405845	10649.9	8327.35	10832.8	6875.41	6906.7	8481.06	4859.68	4917.19	4951.96	3461.57	4385.4	6073.47
RGMC.12136	d__Bacteria	p__Bacillota_A	c__Clostridia	o__Peptostreptococcales	f__Anaerovoracaceae	g__RUG099	s__RUG099 sp017431175	356.587	616.853	618.774	632.487	623.878	587.4	1227.01	807.811	1450.51	1088.01	1169.58	1166.19
RGMC.12105	d__Bacteria	p__Bacillota_A	c__Clostridia	o__Peptostreptococcales	f__Anaerovoracaceae	g__RUG099	s__RUG099 sp017432075	1038.23	1117.29	1269.67	1010.45	1101.95	1079.21	816.882	715.009	961.157	659.062	1072.15	983.522
RGMC.12012	d__Bacteria	p__Bacillota_A	c__Clostridia	o__Peptostreptococcales	f__Anaerovoracaceae	g__RUG099	s__RUG099 sp017434685	352.551	827.663	754.02	1126.88	1270.44	907.465	688.633	822.191	670.62	904.6	766.802	1025.03
RGMC.19131	d__Bacteria	p__Bacillota_A	c__Clostridia	o__Peptostreptococcales	f__Anaerovoracaceae	g__RUG099	s__RUG099 sp902775345	669.611	636.842	715.076	583.911	648.038	635.534	331.047	345	392.585	315.301	423.567	426.226
RGMC.20342	d__Bacteria	p__Bacillota_A	c__Clostridia	o__Peptostreptococcales	f__Anaerovoracaceae	g__RUG099	s__RUG099 sp902788245	0	521.527	519.184	596.203	572.583	554.329	0	517.829	912.649	548.642	701.57	1223.94
RGMC.15849	d__Bacteria	p__Bacillota_A	c__Clostridia	o__Peptostreptococcales	f__Anaerovoracaceae	g__RUG11894	s__RUG11894 sp017557505	448.899	444.407	446.553	417.789	476.895	361.611	174.687	212.483	187.359	214.841	243.488	241.55
RGMC.736	d__Bacteria	p__Bacillota_A	c__Clostridia	o__Peptostreptococcales	f__Anaerovoracaceae	g__RUG11894	s__RUG11894 sp024682015	517.68	395.955	395.362	443.127	462.424	389.612	396.563	377.667	424.68	432.171	506.761	428.725
RGMC.12080	d__Bacteria	p__Bacillota_A	c__Clostridia	o__Peptostreptococcales	f__Anaerovoracaceae	g__RUG13409	s__RUG13409 sp017432725	0	0	0	0	0	0	0	0	0	0	153.063	0
RGMC.14084	d__Bacteria	p__Bacillota_A	c__Clostridia	o__Peptostreptococcales	f__Anaerovoracaceae	g__RUG13615	s__	0	328.114	0	253.215	223.356	279.604	0	0	276.909	0	226.892	273.09
RGMC.15671	d__Bacteria	p__Bacillota_A	c__Clostridia	o__Peptostreptococcales	f__Anaerovoracaceae	g__RUG13615	s__	0	226.112	0	184.598	0	0	0	0	180.024	0	175.125	0
RGMC.11935	d__Bacteria	p__Bacillota_A	c__Clostridia	o__Peptostreptococcales	f__Anaerovoracaceae	g__RUG14258	s__RUG14258 sp017405645	450.988	304.043	308.562	360.075	308.61	234.187	642.929	598.841	827.39	776.248	862.799	1271.74
RGMC.11066	d__Bacteria	p__Bacillota_A	c__Clostridia	o__Peptostreptococcales	f__Anaerovoracaceae	g__RUG14258	s__RUG14258 sp017515705	0	0	0	0	0	0	186.502	0	298.434	234.03	427.926	342.058
RGMC.14544	d__Bacteria	p__Bacillota_A	c__Clostridia	o__Peptostreptococcales	f__Anaerovoracaceae	g__RUG14258	s__RUG14258 sp017515705	0	0	0	0	0	0	111.08	0	171.636	114.586	217.573	182.456
RGMC.27794	d__Bacteria	p__Bacillota_A	c__Clostridia	o__Peptostreptococcales	f__Anaerovoracaceae	g__RUG14258	s__RUG14258 sp017515705	0	0	0	0	0	0	0	0	142.165	0	191.721	163.785
RGMC.14504	d__Bacteria	p__Bacillota_A	c__Clostridia	o__Peptostreptococcales	f__Anaerovoracaceae	g__RUG708	s__	12120.2	10448.4	10687.2	9153.27	9908.2	8631.74	6880.59	6358.52	8564.99	6207.81	10725.6	8912.34
RGMC.17370	d__Bacteria	p__Bacillota_A	c__Clostridia	o__Peptostreptococcales	f__Anaerovoracaceae	g__RUG754	s__RUG754 sp017394515	1212.73	1102.46	1101.77	1001.92	1096.63	973.889	857.494	878.014	1063.6	819.158	1183.44	1021.68
RGMC.10515	d__Bacteria	p__Bacillota_A	c__Clostridia	o__Peptostreptococcales	f__Anaerovoracaceae	g__RUG754	s__RUG754 sp902778565	762.235	740.851	714.253	712.25	751.227	637.069	455.348	459.46	593.918	442.647	705.153	544.433
RGMC.17880	d__Bacteria	p__Bacillota_A	c__Clostridia	o__Peptostreptococcales	f__Anaerovoracaceae	g__RUG754	s__RUG754 sp902778565	630.637	574.967	554.699	540.301	561.673	495.241	364.005	353.8	456.169	338.997	544.386	440.362
RGMC.14659	d__Bacteria	p__Bacillota_A	c__Clostridia	o__Peptostreptococcales	f__Anaerovoracaceae	g__RUG754	s__RUG754 sp902778565	594.139	559.111	546.4	522.294	540.159	482.482	363.804	367.993	460.034	339.519	549.016	434.417
RGMC.19414	d__Bacteria	p__Bacillota_A	c__Clostridia	o__Peptostreptococcales	f__Anaerovoracaceae	g__RUG754	s__RUG754 sp902778565	566.257	564.609	519.074	525.505	567.215	454.623	345.481	341.537	428.839	329.856	549.465	417.815
RGMC.14780	d__Bacteria	p__Bacillota_A	c__Clostridia	o__Peptostreptococcales	f__Anaerovoracaceae	g__RUG754	s__RUG754 sp902778565	582.521	504.253	487.829	492.047	500.695	441.737	317.511	320.65	407.346	306.172	490.4	394.092
RGMC.15751	d__Bacteria	p__Bacillota_A	c__Clostridia	o__Peptostreptococcales	f__Anaerovoracaceae	g__UBA3738	s__	0	0	0	0	0	0	0	0	0	0	281.067	0
RGMC.10472	d__Bacteria	p__Bacillota_A	c__Clostridia	o__Peptostreptococcales	f__Anaerovoracaceae	g__UBA3738	s__UBA3738 sp946410475	0	0	0	0	0	0	0	0	0	0	0	0
RGMC.1575	d__Bacteria	p__Bacillota_A	c__Clostridia	o__Peptostreptococcales	f__Anaerovoracaceae	g__UBA3738	s__UBA3738 sp946410475	0	0	0	0	0	0	0	0	0	0	0	0
RGMC.39512	d__Bacteria	p__Bacillota_A	c__Clostridia	o__Peptostreptococcales	f__Anaerovoracaceae	g__UBA3871	s__	0	0	0	0	0	0	0	0	0	644.174	0	629.066
RGMC.344	d__Bacteria	p__Bacillota_A	c__Clostridia	o__Peptostreptococcales	f__Anaerovoracaceae	g__UBA3871	s__UBA3871 sp002392265	2002.85	1151.69	1405.67	1919.21	2060.17	1276.09	1221.9	1298.01	1158.64	1983.14	1478.67	1806.32
RGMC.9460	d__Bacteria	p__Bacillota_A	c__Clostridia	o__Peptostreptococcales	f__Anaerovoracaceae	g__UBA3871	s__UBA3871 sp002392265	946.624	577.549	662.219	1009.16	1157.06	686.786	745.006	840.191	720.356	1398.17	921.71	975.739
RGMC.27947	d__Bacteria	p__Bacillota_A	c__Clostridia	o__Peptostreptococcales	f__Anaerovoracaceae	g__UBA3871	s__UBA3871 sp002392265	1039.04	529.653	651.941	844.563	888.148	628.803	590.701	638.881	567.312	964.131	653.909	806.094
RGMC.9455	d__Bacteria	p__Bacillota_A	c__Clostridia	o__Peptostreptococcales	f__Anaerovoracaceae	g__UBA3871	s__UBA3871 sp002392265	888.792	470.072	593.649	703.173	745.505	564.483	545.841	590.38	506.591	752.01	533.414	719.363
RGMC.9242	d__Bacteria	p__Bacillota_A	c__Clostridia	o__Peptostreptococcales	f__Anaerovoracaceae	g__UBA3871	s__UBA3871 sp002392265	865.289	465.704	562.314	730.697	777.609	548.866	532.031	555.99	514.191	794.846	557.482	694.358
RGMC.10885	d__Bacteria	p__Bacillota_A	c__Clostridia	o__Peptostreptococcales	f__Anaerovoracaceae	g__UBA3871	s__UBA3871 sp002392265	791.021	432.472	533.181	661.1	702.277	510.738	516.224	546.274	484.063	778.111	528.162	693.96
RGMC.9969	d__Bacteria	p__Bacillota_A	c__Clostridia	o__Peptostreptococcales	f__Anaerovoracaceae	g__UBA3871	s__UBA3871 sp002392265	595.006	370.192	427.594	555.038	579.598	425.605	489.06	511.578	442.978	700.007	470.251	608.418
RGMC.5910	d__Bacteria	p__Bacillota_A	c__Clostridia	o__Peptostreptococcales	f__Anaerovoracaceae	g__UBA3871	s__UBA3871 sp002392265	601.082	352.845	416.863	560.696	575.521	403.535	445.646	486.579	419.222	671.009	453.428	609.648
RGMC.13028	d__Bacteria	p__Bacillota_A	c__Clostridia	o__Peptostreptococcales	f__Anaerovoracaceae	g__UBA3871	s__UBA3871 sp002392265	593.618	346.811	421.739	509.952	534.416	398.791	460.134	486.482	412.245	655.13	441.139	595.018
RGMC.17	d__Bacteria	p__Bacillota_A	c__Clostridia	o__Peptostreptococcales	f__Anaerovoracaceae	g__UBA3871	s__UBA3871 sp016280485	941.937	660.851	726.499	876.425	951.56	672.793	1137.25	1293.88	924.744	1767.41	927.682	1618.19
RGMC.10650	d__Bacteria	p__Bacillota_A	c__Clostridia	o__Peptostreptococcales	f__Peptostreptococcaceae	g__Peptostreptococcus	s__	0	0	0	0	0	0	0	0	0	0	0	0
RGMC.19266	d__Bacteria	p__Bacillota_A	c__Clostridia	o__Peptostreptococcales	f__Peptostreptococcaceae	g__Peptostreptococcus	s__Peptostreptococcus sp900112955	0	0	0	0	0	0	0	0	0	0	0	0
RGMC.29990	d__Bacteria	p__Bacillota_A	c__Clostridia	o__Peptostreptococcales	f__Peptostreptococcaceae	g__Terrisporobacter	s__Terrisporobacter othiniensis	0	0	0	0	0	0	0	0	0	0	0	0
RGMC.292	d__Bacteria	p__Bacillota_A	c__Clostridia	o__Saccharofermentanales	f__Saccharofermentanaceae	g__Firm-16	s__Firm-16 sp016281535	1143.78	1030.29	1083.78	642.445	686.19	805.366	877.799	809.48	770.435	553.797	604.986	744.378
RGMC.21172	d__Bacteria	p__Bacillota_A	c__Clostridia	o__Saccharofermentanales	f__Saccharofermentanaceae	g__Firm-16	s__Firm-16 sp016281535	628.498	546.921	582.294	336.551	379.223	403.186	352.938	405.24	343.533	275.947	303.956	399.586
RGMC.22112	d__Bacteria	p__Bacillota_A	c__Clostridia	o__Saccharofermentanales	f__Saccharofermentanaceae	g__Firm-16	s__Firm-16 sp016281535	576.841	497.899	537.426	311.546	354.204	369.668	332.257	385.157	324.355	267.982	277.051	352.32
RGMC.2775	d__Bacteria	p__Bacillota_A	c__Clostridia	o__Saccharofermentanales	f__Saccharofermentanaceae	g__Firm-16	s__Firm-16 sp016281535	453.647	391.194	407.775	262.032	303.72	296.277	266.411	321.643	256.195	234.285	240.404	275.961
RGMC.3912	d__Bacteria	p__Bacillota_A	c__Clostridia	o__Saccharofermentanales	f__Saccharofermentanaceae	g__Firm-16	s__Firm-16 sp017428545	282.248	190.404	197.444	0	0	150.554	0	0	0	0	0	0
RGMC.12341	d__Bacteria	p__Bacillota_A	c__Clostridia	o__Saccharofermentanales	f__Saccharofermentanaceae	g__Firm-16	s__Firm-16 sp017428545	270.399	184.349	0	0	0	0	0	0	0	0	0	0
RGMC.12253	d__Bacteria	p__Bacillota_A	c__Clostridia	o__Saccharofermentanales	f__Saccharofermentanaceae	g__Firm-16	s__Firm-16 sp017428545	235.914	163.33	0	0	0	0	0	0	0	0	0	0
RGMC.40291	d__Bacteria	p__Bacillota_A	c__Clostridia	o__Saccharofermentanales	f__Saccharofermentanaceae	g__Firm-16	s__Firm-16 sp017428545	236.564	155.375	0	0	0	0	0	0	0	0	0	0
RGMC.4074	d__Bacteria	p__Bacillota_A	c__Clostridia	o__Saccharofermentanales	f__Saccharofermentanaceae	g__Firm-16	s__Firm-16 sp017428545	135.395	0	0	0	0	0	0	0	0	0	0	0
RGMC.40370	d__Bacteria	p__Bacillota_A	c__Clostridia	o__Saccharofermentanales	f__Saccharofermentanaceae	g__Saccharofermentans	s__	34356.5	22931.6	26508.7	12439.6	12738.4	18578.5	13614.6	16599.4	8771.25	10269.5	5951.68	14985.4
RGMC.29689	d__Bacteria	p__Bacillota_A	c__Clostridia	o__Saccharofermentanales	f__Saccharofermentanaceae	g__Saccharofermentans	s__	18114.6	11758.9	13502.5	6990.31	8344.32	9414.79	7242.18	9932.55	5392.51	6674.03	4380.29	8038.06
RGMC.26905	d__Bacteria	p__Bacillota_A	c__Clostridia	o__Saccharofermentanales	f__Saccharofermentanaceae	g__Saccharofermentans	s__	2580.39	3596.16	4065.79	2852.55	3114.84	3586.06	4951.99	4270.97	4507.06	3934.79	4637.18	3479.55
RGMC.20622	d__Bacteria	p__Bacillota_A	c__Clostridia	o__Saccharofermentanales	f__Saccharofermentanaceae	g__Saccharofermentans	s__Saccharofermentans sp015069205	337.527	0	0	0	0	0	0	0	0	0	0	0
RGMC.281	d__Bacteria	p__Bacillota_A	c__Clostridia	o__Saccharofermentanales	f__Saccharofermentanaceae	g__Saccharofermentans	s__Saccharofermentans sp016292135	2067.13	1317.26	1493.72	1329.68	1338.13	1421.22	909.618	998.173	668.811	944.72	589.374	962.843
RGMC.26966	d__Bacteria	p__Bacillota_A	c__Clostridia	o__Saccharofermentanales	f__Saccharofermentanaceae	g__Saccharofermentans	s__Saccharofermentans sp016292135	437.948	281.039	306.558	255.304	261.182	264.119	173.533	215.675	142.418	192.557	131.216	184.204
RGMC.2481	d__Bacteria	p__Bacillota_A	c__Clostridia	o__Saccharofermentanales	f__Saccharofermentanaceae	g__Saccharofermentans	s__Saccharofermentans sp016292215	2424.14	1485.69	1509.95	1106.32	1148.65	1250.68	743.629	1006.12	568.812	796.659	456.799	858.192
RGMC.14615	d__Bacteria	p__Bacillota_A	c__Clostridia	o__Saccharofermentanales	f__Saccharofermentanaceae	g__Saccharofermentans	s__Saccharofermentans sp016292215	1137.79	719.088	709.839	526.774	641.959	555.407	312.839	461.896	267.14	411.678	255.48	430.332
RGMC.37990	d__Bacteria	p__Bacillota_A	c__Clostridia	o__Saccharofermentanales	f__Saccharofermentanaceae	g__Saccharofermentans	s__Saccharofermentans sp016292215	867.22	543.955	541.293	371.027	430.306	412.419	241.365	349.811	203.316	292.1	0	328.833
RGMC.19543	d__Bacteria	p__Bacillota_A	c__Clostridia	o__Saccharofermentanales	f__Saccharofermentanaceae	g__Saccharofermentans	s__Saccharofermentans sp017428155	546.901	299.394	308.754	231.315	238.269	261.88	0	229.806	0	209.706	0	200.217
RGMC.14510	d__Bacteria	p__Bacillota_A	c__Clostridia	o__Saccharofermentanales	f__Saccharofermentanaceae	g__Saccharofermentans	s__Saccharofermentans sp017428155	453.886	234.755	240.368	0	0	195.727	0	0	0	0	0	0
RGMC.12269	d__Bacteria	p__Bacillota_A	c__Clostridia	o__Saccharofermentanales	f__Saccharofermentanaceae	g__Saccharofermentans	s__Saccharofermentans sp017428155	404.433	0	0	0	0	0	0	0	0	0	0	0
RGMC.14744	d__Bacteria	p__Bacillota_A	c__Clostridia	o__Saccharofermentanales	f__Saccharofermentanaceae	g__Saccharofermentans	s__Saccharofermentans sp017509205	4656.9	3687.42	4025.65	2156.58	2336.45	2834.82	3770.87	4163.38	3457.23	2781.18	2715.3	3602.46
RGMC.38936	d__Bacteria	p__Bacillota_A	c__Clostridia	o__Saccharofermentanales	f__Saccharofermentanaceae	g__Saccharofermentans	s__Saccharofermentans sp024695505	300.98	262.87	277.395	178.23	175.814	227.51	345.165	288.351	306.671	246.205	240.523	272.205
RGMC.40513	d__Bacteria	p__Bacillota_A	c__Clostridia	o__Saccharofermentanales	f__Saccharofermentanaceae	g__Saccharofermentans	s__Saccharofermentans sp024695505	0	298.173	0	0	0	0	417.999	0	365.078	0	296.603	0
RGMC.11026	d__Bacteria	p__Bacillota_A	c__Clostridia	o__Saccharofermentanales	f__Saccharofermentanaceae	g__Saccharofermentans	s__Saccharofermentans sp024695505	0	0	0	0	0	0	0	0	0	0	0	0
RGMC.14712	d__Bacteria	p__Bacillota_B	c__Dehalobacteriia	o__UBA4068	f__UBA4068	g__CALXSV01	s__	1186.22	970.5	912.841	931.505	890.97	738.913	0	204.552	0	115.094	0	90.2837
RGMC.12068	d__Bacteria	p__Bacillota_B	c__Dehalobacteriia	o__UBA4068	f__UBA4068	g__CALXSV01	s__CALXSV01 sp947307285	1332.75	948.048	977.058	837.714	816.893	735.184	0	143.66	0	0	0	0
RGMC.38919	d__Bacteria	p__Bacillota_B	c__Dehalobacteriia	o__UBA4068	f__UBA4068	g__CALXSV01	s__CALXSV01 sp947307285	853.667	773.725	718.638	751.413	765.132	574.944	0	141.236	0	0	0	0
RGMC.14033	d__Bacteria	p__Bacillota_B	c__Dehalobacteriia	o__UBA4068	f__UBA4068	g__CALXSV01	s__CALXSV01 sp947307285	867.877	729.691	681.069	670.137	668.504	538.201	0	138.393	0	0	0	0
RGMC.11999	d__Bacteria	p__Bacillota_B	c__Dehalobacteriia	o__UBA4068	f__UBA4068	g__CALXSV01	s__CALXSV01 sp947307285	660.296	575.99	513.581	565.696	545.118	442.247	0	139.483	0	0	0	88.6636
RGMC.40033	d__Bacteria	p__Bacillota_B	c__Dehalobacteriia	o__UBA4068	f__UBA4068	g__CALXSV01	s__CALXSV01 sp947307285	697.97	612.301	635.931	540.449	512.286	441.918	0	117.967	0	0	0	0
RGMC.12011	d__Bacteria	p__Bacillota_B	c__Dehalobacteriia	o__UBA4068	f__UBA4068	g__CALXSV01	s__CALXSV01 sp947307285	486.808	396.331	362.503	391.625	388.853	310.433	0	100.484	0	0	0	0
RGMC.14792	d__Bacteria	p__Bacillota_B	c__Dehalobacteriia	o__UBA4068	f__UBA4068	g__HGM13862	s__	591.133	423.525	475.312	285.321	272.912	284.993	0	0	0	0	0	0
RGMC.22155	d__Bacteria	p__Bacillota_B	c__Dehalobacteriia	o__UBA7702	f__UBA7702	g__UBA7702	s__UBA7702 sp902766525	441.372	379.897	374.382	357.995	403.775	322.884	124.476	148.6	137.97	123.126	172.927	159.294
RGMC.12749	d__Bacteria	p__Bacillota_C	c__Negativicutes	o__Acidaminococcales	f__Acidaminococcaceae	g__Succiniclasticum	s__	1005.63	944.088	999.236	850.751	888.884	920.144	361.162	354.324	249.619	315.021	278.989	303.36
RGMC.23836	d__Bacteria	p__Bacillota_C	c__Negativicutes	o__Acidaminococcales	f__Acidaminococcaceae	g__Succiniclasticum	s__	461.978	337.079	400.951	331.919	310.917	320.872	289.399	297.876	246.929	267.209	221.466	302.279
RGMC.23786	d__Bacteria	p__Bacillota_C	c__Negativicutes	o__Acidaminococcales	f__Acidaminococcaceae	g__Succiniclasticum	s__	447.18	408.323	454.954	305.148	310.436	362.43	0	0	0	0	0	0
RGMC.10963	d__Bacteria	p__Bacillota_C	c__Negativicutes	o__Acidaminococcales	f__Acidaminococcaceae	g__Succiniclasticum	s__	251.191	179.871	0	0	0	0	0	0	0	0	0	0
RGMC.11924	d__Bacteria	p__Bacillota_C	c__Negativicutes	o__Acidaminococcales	f__Acidaminococcaceae	g__Succiniclasticum	s__Succiniclasticum sp017405945	937.379	659.298	782.565	636.063	595.064	598.844	571.733	619.638	462.045	547.755	423.659	613.848
RGMC.40677	d__Bacteria	p__Bacillota_C	c__Negativicutes	o__Acidaminococcales	f__Acidaminococcaceae	g__Succiniclasticum	s__Succiniclasticum sp017443005	0	0	0	0	0	0	466.771	0	0	0	600.158	0
RGMC.29598	d__Bacteria	p__Bacillota_C	c__Negativicutes	o__Acidaminococcales	f__Acidaminococcaceae	g__Succiniclasticum	s__Succiniclasticum sp017443005	0	0	0	0	0	0	202.451	0	0	196.604	203.944	169.124
RGMC.18582	d__Bacteria	p__Bacillota_C	c__Negativicutes	o__Acidaminococcales	f__Acidaminococcaceae	g__Succiniclasticum	s__Succiniclasticum sp017443005	0	0	0	0	0	0	164.574	0	0	158.463	156.399	147.931
RGMC.29396	d__Bacteria	p__Bacillota_C	c__Negativicutes	o__Acidaminococcales	f__Acidaminococcaceae	g__Succiniclasticum	s__Succiniclasticum sp017443005	0	0	0	0	0	0	162.42	0	0	0	143.81	0
RGMC.18526	d__Bacteria	p__Bacillota_C	c__Negativicutes	o__Acidaminococcales	f__Acidaminococcaceae	g__Succiniclasticum	s__Succiniclasticum sp017443005	0	0	0	0	0	0	153.004	0	0	0	137.488	147.144
RGMC.9227	d__Bacteria	p__Bacillota_C	c__Negativicutes	o__Acidaminococcales	f__Acidaminococcaceae	g__Succiniclasticum	s__Succiniclasticum sp017443005	0	0	0	0	0	0	121.361	0	102.944	0	117.066	94.0853
RGMC.40536	d__Bacteria	p__Bacillota_C	c__Negativicutes	o__Acidaminococcales	f__Acidaminococcaceae	g__Succiniclasticum	s__Succiniclasticum sp017443005	0	0	0	0	0	0	161.083	0	0	0	152.894	0
RGMC.7561	d__Bacteria	p__Bacillota_C	c__Negativicutes	o__Acidaminococcales	f__Acidaminococcaceae	g__Succiniclasticum	s__Succiniclasticum sp017443005	0	0	0	0	0	0	136.74	0	0	0	122.09	136.903
RGMC.15281	d__Bacteria	p__Bacillota_C	c__Negativicutes	o__Acidaminococcales	f__Acidaminococcaceae	g__Succiniclasticum	s__Succiniclasticum sp017443005	0	0	0	0	0	0	0	0	0	0	0	0
RGMC.5783	d__Bacteria	p__Bacillota_C	c__Negativicutes	o__Acidaminococcales	f__Acidaminococcaceae	g__Succiniclasticum	s__Succiniclasticum sp017443005	0	0	0	0	0	0	161.375	0	0	0	140.01	0
RGMC.2925	d__Bacteria	p__Bacillota_C	c__Negativicutes	o__Acidaminococcales	f__Acidaminococcaceae	g__Succiniclasticum	s__Succiniclasticum sp017443005	0	0	0	0	0	0	0	0	0	0	145.252	0
RGMC.40574	d__Bacteria	p__Bacillota_C	c__Negativicutes	o__Acidaminococcales	f__Acidaminococcaceae	g__Succiniclasticum	s__Succiniclasticum sp017443005	0	0	0	0	0	0	132.383	0	0	0	106.913	0
RGMC.12200	d__Bacteria	p__Bacillota_C	c__Negativicutes	o__Acidaminococcales	f__Acidaminococcaceae	g__Succiniclasticum	s__Succiniclasticum sp017443005	0	0	0	0	0	0	0	0	0	0	128.036	0
RGMC.39213	d__Bacteria	p__Bacillota_C	c__Negativicutes	o__Acidaminococcales	f__Acidaminococcaceae	g__Succiniclasticum	s__Succiniclasticum sp017443005	0	0	0	0	0	0	126.676	0	0	0	0	0
RGMC.12618	d__Bacteria	p__Bacillota_C	c__Negativicutes	o__Acidaminococcales	f__Acidaminococcaceae	g__Succiniclasticum	s__Succiniclasticum sp017443005	0	0	0	0	0	0	0	0	0	0	111.525	0
RGMC.15157	d__Bacteria	p__Bacillota_C	c__Negativicutes	o__Acidaminococcales	f__Acidaminococcaceae	g__Succiniclasticum	s__Succiniclasticum sp017443005	0	0	0	0	0	0	0	0	0	0	109.372	0
RGMC.29644	d__Bacteria	p__Bacillota_C	c__Negativicutes	o__Acidaminococcales	f__Acidaminococcaceae	g__Succiniclasticum	s__Succiniclasticum sp017443005	0	0	0	0	0	0	0	0	0	0	0	0
RGMC.29017	d__Bacteria	p__Bacillota_C	c__Negativicutes	o__Acidaminococcales	f__Acidaminococcaceae	g__Succiniclasticum	s__Succiniclasticum sp017443005	0	0	0	0	0	0	0	0	0	0	0	0
RGMC.40576	d__Bacteria	p__Bacillota_C	c__Negativicutes	o__Acidaminococcales	f__Acidaminococcaceae	g__Succiniclasticum	s__Succiniclasticum sp017443005	0	0	0	0	0	0	0	0	0	0	0	0
RGMC.40597	d__Bacteria	p__Bacillota_C	c__Negativicutes	o__Acidaminococcales	f__Acidaminococcaceae	g__Succiniclasticum	s__Succiniclasticum sp017443005	0	0	0	0	0	0	0	0	0	0	0	0
RGMC.28922	d__Bacteria	p__Bacillota_C	c__Negativicutes	o__Acidaminococcales	f__Acidaminococcaceae	g__Succiniclasticum	s__Succiniclasticum sp017443005	0	0	0	0	0	0	0	0	0	0	0	0
RGMC.29021	d__Bacteria	p__Bacillota_C	c__Negativicutes	o__Acidaminococcales	f__Acidaminococcaceae	g__Succiniclasticum	s__Succiniclasticum sp017443005	0	0	0	0	0	0	0	0	0	0	0	0
RGMC.12185	d__Bacteria	p__Bacillota_C	c__Negativicutes	o__Acidaminococcales	f__Acidaminococcaceae	g__Succiniclasticum	s__Succiniclasticum sp017443005	0	0	0	0	0	0	0	0	0	0	0	0
RGMC.28941	d__Bacteria	p__Bacillota_C	c__Negativicutes	o__Acidaminococcales	f__Acidaminococcaceae	g__Succiniclasticum	s__Succiniclasticum sp017443005	0	0	0	0	0	0	0	0	0	0	0	0
RGMC.28992	d__Bacteria	p__Bacillota_C	c__Negativicutes	o__Acidaminococcales	f__Acidaminococcaceae	g__Succiniclasticum	s__Succiniclasticum sp017443005	0	0	0	0	0	0	0	0	0	0	0	0
RGMC.29372	d__Bacteria	p__Bacillota_C	c__Negativicutes	o__Acidaminococcales	f__Acidaminococcaceae	g__Succiniclasticum	s__Succiniclasticum sp017443005	0	0	0	0	0	0	0	0	0	0	0	0
RGMC.28919	d__Bacteria	p__Bacillota_C	c__Negativicutes	o__Acidaminococcales	f__Acidaminococcaceae	g__Succiniclasticum	s__Succiniclasticum sp017443005	0	0	0	0	0	0	0	0	0	0	0	0
RGMC.8716	d__Bacteria	p__Bacillota_C	c__Negativicutes	o__Acidaminococcales	f__Acidaminococcaceae	g__Succiniclasticum	s__Succiniclasticum sp017443005	0	0	0	0	0	0	0	0	0	0	0	0
RGMC.29565	d__Bacteria	p__Bacillota_C	c__Negativicutes	o__Acidaminococcales	f__Acidaminococcaceae	g__Succiniclasticum	s__Succiniclasticum sp017443005	0	0	0	0	0	0	0	0	0	0	0	0
RGMC.29705	d__Bacteria	p__Bacillota_C	c__Negativicutes	o__Acidaminococcales	f__Acidaminococcaceae	g__Succiniclasticum	s__Succiniclasticum sp017443005	0	0	0	0	0	0	0	0	0	0	0	0
RGMC.10950	d__Bacteria	p__Bacillota_C	c__Negativicutes	o__Acidaminococcales	f__Acidaminococcaceae	g__Succiniclasticum	s__Succiniclasticum sp017443005	0	0	0	0	0	0	0	0	0	0	0	0
RGMC.28895	d__Bacteria	p__Bacillota_C	c__Negativicutes	o__Acidaminococcales	f__Acidaminococcaceae	g__Succiniclasticum	s__Succiniclasticum sp017443005	0	0	0	0	0	0	0	0	0	0	0	0
RGMC.13858	d__Bacteria	p__Bacillota_C	c__Negativicutes	o__Acidaminococcales	f__Acidaminococcaceae	g__Succiniclasticum	s__Succiniclasticum sp017443005	0	0	0	0	0	0	0	0	0	0	0	0
RGMC.40492	d__Bacteria	p__Bacillota_C	c__Negativicutes	o__Acidaminococcales	f__Acidaminococcaceae	g__Succiniclasticum	s__Succiniclasticum sp017443005	0	0	0	0	0	0	0	0	0	0	0	0
RGMC.29659	d__Bacteria	p__Bacillota_C	c__Negativicutes	o__Acidaminococcales	f__Acidaminococcaceae	g__Succiniclasticum	s__Succiniclasticum sp017443005	0	0	0	0	0	0	0	0	0	0	0	0
RGMC.29665	d__Bacteria	p__Bacillota_C	c__Negativicutes	o__Acidaminococcales	f__Acidaminococcaceae	g__Succiniclasticum	s__Succiniclasticum sp017443005	0	0	0	0	0	0	0	0	0	0	0	0
RGMC.29904	d__Bacteria	p__Bacillota_C	c__Negativicutes	o__Acidaminococcales	f__Acidaminococcaceae	g__Succiniclasticum	s__Succiniclasticum sp017443005	0	0	0	0	0	0	0	0	0	0	0	0
RGMC.5429	d__Bacteria	p__Bacillota_C	c__Negativicutes	o__Acidaminococcales	f__Acidaminococcaceae	g__Succiniclasticum	s__Succiniclasticum sp017443005	0	0	0	0	0	0	0	0	0	0	0	0
RGMC.2587	d__Bacteria	p__Bacillota_C	c__Negativicutes	o__Acidaminococcales	f__Acidaminococcaceae	g__Succiniclasticum	s__Succiniclasticum sp017443005	0	0	0	0	0	0	0	0	0	0	0	0
RGMC.1824	d__Bacteria	p__Bacillota_C	c__Negativicutes	o__Acidaminococcales	f__Acidaminococcaceae	g__Succiniclasticum	s__Succiniclasticum sp017443005	0	0	0	0	0	0	0	0	0	0	0	0
RGMC.29473	d__Bacteria	p__Bacillota_C	c__Negativicutes	o__Acidaminococcales	f__Acidaminococcaceae	g__Succiniclasticum	s__Succiniclasticum sp017443005	0	0	0	0	0	0	0	0	0	0	0	0
RGMC.12724	d__Bacteria	p__Bacillota_C	c__Negativicutes	o__Acidaminococcales	f__Acidaminococcaceae	g__Succiniclasticum	s__Succiniclasticum sp017443165	284.068	189.467	220.363	191.72	176.899	178.627	0	0	0	0	0	0
RGMC.5727	d__Bacteria	p__Bacillota_C	c__Negativicutes	o__Selenomonadales	f__Selenomonadaceae	g__Anaerovibrio	s__Anaerovibrio lipolyticus	0	0	0	0	0	0	0	0	0	0	0	0
RGMC.8339	d__Bacteria	p__Bacillota_C	c__Negativicutes	o__Selenomonadales	f__Selenomonadaceae	g__Anaerovibrio	s__Anaerovibrio lipolyticus	0	0	0	0	0	0	0	0	0	0	0	0
RGMC.9582	d__Bacteria	p__Bacillota_C	c__Negativicutes	o__Selenomonadales	f__Selenomonadaceae	g__Anaerovibrio	s__Anaerovibrio lipolyticus	0	0	0	0	0	0	0	0	0	0	230.616	0
RGMC.8565	d__Bacteria	p__Bacillota_C	c__Negativicutes	o__Selenomonadales	f__Selenomonadaceae	g__Anaerovibrio	s__Anaerovibrio lipolyticus	0	0	0	0	0	0	0	0	0	0	0	0
RGMC.22428	d__Bacteria	p__Bacillota_C	c__Negativicutes	o__Selenomonadales	f__Selenomonadaceae	g__Anaerovibrio	s__Anaerovibrio lipolyticus	0	0	0	0	0	0	0	0	0	0	0	0
RGMC.8473	d__Bacteria	p__Bacillota_C	c__Negativicutes	o__Selenomonadales	f__Selenomonadaceae	g__Anaerovibrio	s__Anaerovibrio sp902785445	0	0	0	0	0	0	0	0	0	0	0	0
RGMC.20082	d__Bacteria	p__Bacillota_C	c__Negativicutes	o__Selenomonadales	f__Selenomonadaceae	g__Anaerovibrio	s__Anaerovibrio sp902785445	0	0	0	0	0	0	0	0	0	0	0	0
RGMC.28868	d__Bacteria	p__Bacillota_C	c__Negativicutes	o__Selenomonadales	f__Selenomonadaceae	g__Anaerovibrio	s__Anaerovibrio sp902785445	0	0	0	0	0	0	0	0	0	0	0	0
RGMC.217	d__Bacteria	p__Bacillota_C	c__Negativicutes	o__Selenomonadales	f__Selenomonadaceae	g__RUG12372	s__RUG12372 sp016286075	0	157.309	0	0	0	0	179.874	225.278	136.072	0	175.907	0
RGMC.40006	d__Bacteria	p__Bacillota_I	c__Bacilli_A	o__Acholeplasmatales	f__Anaeroplasmataceae	g__Anaeroplasma	s__	0	0	0	0	0	0	296.159	229.129	428.796	342.349	511.882	173.554
RGMC.29590	d__Bacteria	p__Bacillota_I	c__Bacilli_A	o__Acholeplasmatales	f__Anaeroplasmataceae	g__Anaeroplasma	s__	0	0	0	0	0	0	0	0	189.969	0	254.983	0
RGMC.23015	d__Bacteria	p__Bacillota_I	c__Bacilli_A	o__Acholeplasmatales	f__Anaeroplasmataceae	g__Anaeroplasma	s__	0	0	0	0	0	0	0	0	0	0	0	0
RGMC.18360	d__Bacteria	p__Bacillota_I	c__Bacilli_A	o__Acholeplasmatales	f__Anaeroplasmataceae	g__Anaeroplasma	s__Anaeroplasma sp017449215	0	0	0	0	0	0	0	0	218.658	0	226.727	0
RGMC.35164	d__Bacteria	p__Bacillota_I	c__Bacilli_A	o__Erysipelotrichales	f__Erysipelotrichaceae	g__Bulleidia	s__	1928.82	1920.78	2263.84	1503.88	1443.52	1896.51	1107.23	1310.66	1217.64	867.989	969.836	1243.48
RGMC.11157	d__Bacteria	p__Bacillota_I	c__Bacilli_A	o__Erysipelotrichales	f__Erysipelotrichaceae	g__Bulleidia	s__	0	724.435	804.521	579.191	504.301	610.384	831.662	780.41	754.134	632.924	731.819	781.898
RGMC.11978	d__Bacteria	p__Bacillota_I	c__Bacilli_A	o__Erysipelotrichales	f__Erysipelotrichaceae	g__Bulleidia	s__Bulleidia sp017404505	1130.16	1525.99	1639.59	1114.54	1076.45	1486.11	1126.07	1072.54	1381.97	758.298	1079.02	1188.68
RGMC.166	d__Bacteria	p__Bacillota_I	c__Bacilli_A	o__Erysipelotrichales	f__Erysipelotrichaceae	g__Bulleidia	s__Bulleidia sp017404505	624.581	923.078	939.431	688.782	738.166	836.547	647.254	624.604	806.634	503.556	765.117	709.075
RGMC.12148	d__Bacteria	p__Bacillota_I	c__Bacilli_A	o__Erysipelotrichales	f__Erysipelotrichaceae	g__Bulleidia	s__Bulleidia sp017430925	537.225	735.301	774.163	850.944	882.044	724.363	249.608	452.589	221.413	468.182	270.92	395.51
RGMC.12097	d__Bacteria	p__Bacillota_I	c__Bacilli_A	o__Erysipelotrichales	f__Erysipelotrichaceae	g__Bulleidia	s__Bulleidia sp017432325	0	348.75	0	303.494	286.967	301.803	0	0	261.78	0	282.413	230.298
RGMC.12075	d__Bacteria	p__Bacillota_I	c__Bacilli_A	o__Erysipelotrichales	f__Erysipelotrichaceae	g__Bulleidia	s__Bulleidia sp017433125	348.665	548.16	617.362	484.247	462.67	523.789	266.505	302.809	263.138	293.709	248.776	378.483
RGMC.12063	d__Bacteria	p__Bacillota_I	c__Bacilli_A	o__Erysipelotrichales	f__Erysipelotrichaceae	g__Bulleidia	s__Bulleidia sp017433125	254.137	434.722	477.781	396.001	371.553	421.949	234.35	265.581	230.731	238.337	219.022	314.835
RGMC.14543	d__Bacteria	p__Bacillota_I	c__Bacilli_A	o__Erysipelotrichales	f__Erysipelotrichaceae	g__Bulleidia	s__Bulleidia sp017512555	791.439	1405.32	1453.65	1427.65	1432.77	1348.31	445.861	718.472	374.812	750.124	396.474	697.79
RGMC.502	d__Bacteria	p__Bacillota_I	c__Bacilli_A	o__Erysipelotrichales	f__Erysipelotrichaceae	g__Bulleidia	s__Bulleidia sp024693325	0	0	0	0	0	0	0	0	0	0	154.53	0
RGMC.602	d__Bacteria	p__Bacillota_I	c__Bacilli_A	o__Erysipelotrichales	f__Erysipelotrichaceae	g__Bulleidia	s__Bulleidia sp024696355	751.686	498.63	541.42	443.897	466.643	490.535	502.153	392.257	441.55	479.098	415.441	547.372
RGMC.18271	d__Bacteria	p__Bacillota_I	c__Bacilli_A	o__Erysipelotrichales	f__Erysipelotrichaceae	g__Bulleidia	s__Bulleidia sp902778375	0	1193.34	1311.63	0	871.175	1193.33	705.31	0	822.414	0	701.564	788.3
RGMC.19391	d__Bacteria	p__Bacillota_I	c__Bacilli_A	o__Erysipelotrichales	f__Erysipelotrichaceae	g__Bulleidia	s__Bulleidia sp902778375	0	598.33	0	0	0	587.689	0	0	464.892	0	437.466	446.482
RGMC.11929	d__Bacteria	p__Bacillota_I	c__Bacilli_A	o__Erysipelotrichales	f__Erysipelotrichaceae	g__RUG521	s__RUG521 sp017405785	360.129	414.541	447.073	410.1	441.082	423.097	335.568	343.742	391.91	295.116	411.36	365.498
RGMC.39684	d__Bacteria	p__Bacillota_I	c__Bacilli_A	o__Erysipelotrichales	f__Erysipelotrichaceae	g__RUG521	s__RUG521 sp017405785	0	0	0	0	0	116.551	0	0	0	0	0	0
RGMC.12850	d__Bacteria	p__Bacillota_I	c__Bacilli_A	o__Erysipelotrichales	f__Erysipelotrichaceae	g__RUG521	s__RUG521 sp017445225	0	0	0	0	0	0	113.745	0	114.088	0	124.152	85.1872
RGMC.14575	d__Bacteria	p__Bacillota_I	c__Bacilli_A	o__Erysipelotrichales	f__Erysipelotrichaceae	g__RUG521	s__RUG521 sp017512285	167.209	210.723	220.272	190.326	211.365	199.433	337.309	247.396	462.083	265.304	562.745	313.05
RGMC.10813	d__Bacteria	p__Bacillota_I	c__Bacilli_A	o__Erysipelotrichales	f__Erysipelotrichaceae	g__RUG521	s__RUG521 sp017516045	0	0	0	0	0	0	0	0	0	0	0	0
RGMC.14587	d__Bacteria	p__Bacillota_I	c__Bacilli_A	o__Erysipelotrichales	f__Erysipelotrichaceae	g__RUG521	s__RUG521 sp017516045	0	0	0	0	0	0	0	0	0	0	0	0
RGMC.13910	d__Bacteria	p__Bacillota_I	c__Bacilli_A	o__Erysipelotrichales	f__Erysipelotrichaceae	g__RUG521	s__RUG521 sp900319675	0	0	0	0	0	0	0	0	101.602	0	123.848	0
RGMC.11904	d__Bacteria	p__Bacillota_I	c__Bacilli_A	o__Erysipelotrichales	f__Erysipelotrichaceae	g__RUG521	s__RUG521 sp900319675	0	0	0	0	0	0	0	0	0	0	118.434	0
RGMC.10770	d__Bacteria	p__Bacillota_I	c__Bacilli_A	o__Erysipelotrichales	f__Erysipelotrichaceae	g__UBA636	s__	896.628	640.267	731.758	459.483	317.318	610.584	577.871	478.181	467.219	339.536	285.485	510.089
RGMC.10551	d__Bacteria	p__Bacillota_I	c__Bacilli_A	o__Erysipelotrichales	f__Erysipelotrichaceae	g__UBA636	s__	0	0	0	0	0	0	0	0	0	0	0	0
RGMC.12111	d__Bacteria	p__Bacillota_I	c__Bacilli_A	o__Erysipelotrichales	f__Erysipelotrichaceae	g__UBA636	s__UBA636 sp017432005	680.73	721.837	781.527	691.607	621.606	765.456	1057.23	835.273	1055.09	925.278	864.564	970.385
RGMC.13012	d__Bacteria	p__Bacillota_I	c__Bacilli_A	o__Erysipelotrichales	f__Erysipelotrichaceae	g__UBA636	s__UBA636 sp017454765	152.393	125.622	0	0	150.895	134.613	139.712	0	141.202	154.732	151.819	129.703
RGMC.16377	d__Bacteria	p__Bacillota_I	c__Bacilli_A	o__Erysipelotrichales	f__Erysipelotrichaceae	g__UBA636	s__UBA636 sp017614055	150.539	0	0	0	0	0	0	0	0	0	110.764	0
RGMC.16164	d__Bacteria	p__Bacillota_I	c__Bacilli_A	o__Erysipelotrichales	f__Erysipelotrichaceae	g__UBA636	s__UBA636 sp017620435	127.362	0	0	113.32	134.871	102.383	120.811	116.986	134.584	169.959	144.26	112.669
RGMC.10714	d__Bacteria	p__Bacillota_I	c__Bacilli_A	o__ML615J-28	f__CAG-698	g__Tener-01	s__Tener-01 sp001604495	363.662	160.789	179.567	316.259	359.377	248.828	0	166.359	0	223.258	114.72	121.481
RGMC.29269	d__Bacteria	p__Bacillota_I	c__Bacilli_A	o__ML615J-28	f__CAG-698	g__Tener-01	s__Tener-01 sp001604495	0	0	0	0	146.453	0	0	0	0	0	0	0
RGMC.2410	d__Bacteria	p__Bacillota_I	c__Bacilli_A	o__RF39	f__UBA660	g__RGIG9169	s__	0	0	0	0	0	0	0	0	234.954	0	262.687	0
RGMC.2514	d__Bacteria	p__Bacillota_I	c__Bacilli_A	o__RF39	f__UBA660	g__RGIG9169	s__	0	0	0	0	0	0	0	0	0	0	0	0
RGMC.17044	d__Bacteria	p__Bacillota_I	c__Bacilli_A	o__RF39	f__UBA660	g__RGIG9169	s__RGIG9169 sp017934595	0	0	0	0	0	0	790.933	478.271	1161.35	432.447	1037.02	286.147
RGMC.27190	d__Bacteria	p__Bacillota_I	c__Bacilli_A	o__RF39	f__UBA660	g__RUG12783	s__	0	0	0	0	0	0	0	0	5983.53	0	4641.1	0
RGMC.17383	d__Bacteria	p__Bacillota_I	c__Bacilli_A	o__RFN20	f__CAG-826	g__RGIG9670	s__RGIG9670 sp017651565	369.47	257.405	261.634	503.444	549.224	523.389	607.902	666.499	613.962	834.707	616.986	618.199
RGMC.570	d__Bacteria	p__Bacillota_I	c__Bacilli_A	o__RFN20	f__CAG-826	g__RGIG9670	s__RGIG9670 sp024695405	357.134	260.539	254.092	505.082	549.327	505.618	567.491	681.334	601.746	883.481	646.31	599.725
RGMC.38228	d__Bacteria	p__Bacillota_I	c__Bacilli_A	o__RFN20	f__CAG-826	g__RUG13091	s__	716.523	548.156	639.145	973.36	1058.95	805.326	866.932	978.609	631.44	1254.67	666.597	740.649
RGMC.38719	d__Bacteria	p__Bacillota_I	c__Bacilli_A	o__RFN20	f__CAG-826	g__RUG13091	s__	326.284	290.854	293.314	460.286	560.489	394.664	273.897	349.858	239.35	484.766	268.009	284.156
RGMC.1406	d__Bacteria	p__Bacillota_I	c__Bacilli_A	o__RFN20	f__CAG-826	g__RUG13091	s__	0	0	0	241.195	296.28	214.251	0	194.87	0	298.315	0	0
RGMC.10806	d__Bacteria	p__Bacillota_I	c__Bacilli_A	o__RFN20	f__CAG-826	g__RUG13091	s__	0	0	0	0	0	321.374	0	0	0	358.016	0	0
RGMC.198	d__Bacteria	p__Bacillota_I	c__Bacilli_A	o__RFN20	f__CAG-826	g__RUG13091	s__RUG13091 sp016290145	708.565	737.531	714.74	1309.25	1536.77	1164.8	684.104	1004.95	424.256	1506.41	425.277	747.069
RGMC.16188	d__Bacteria	p__Bacillota_I	c__Bacilli_A	o__RFN20	f__CAG-826	g__RUG13091	s__RUG13091 sp017619815	262.894	262.519	254.378	472.119	564.636	415.779	251.345	373.038	0	558.772	0	262.834
RGMC.25535	d__Bacteria	p__Bacillota_I	c__Bacilli_A	o__RFN20	f__CAG-826	g__RUG14515	s__	747.559	478.977	524.436	735.104	799.217	691.963	538.308	637.337	459.565	818.574	495.985	565.346
RGMC.37754	d__Bacteria	p__Bacillota_I	c__Bacilli_A	o__RFN20	f__CAG-826	g__RUG14515	s__	609.174	452.916	443.541	693.695	775.939	646.764	458.18	568.272	394.058	742.551	469.89	422.421
RGMC.38607	d__Bacteria	p__Bacillota_I	c__Bacilli_A	o__RFN20	f__CAG-826	g__RUG14515	s__	181.166	99.6374	0	210.758	239.907	195.272	336.816	291.96	375.878	424.644	442.338	280.147
RGMC.40257	d__Bacteria	p__Bacillota_I	c__Bacilli_A	o__RFN20	f__CAG-826	g__RUG14515	s__	0	0	0	282.041	256.336	325.845	0	0	0	318.757	0	0
RGMC.38390	d__Bacteria	p__Bacillota_I	c__Bacilli_A	o__RFN20	f__CAG-826	g__RUG14515	s__RUG14515 sp902782395	1066.98	665.879	710.544	1498.21	1564.66	1240.73	2257.81	1950.83	2619.64	2932.88	2932.43	1741.71
RGMC.25491	d__Bacteria	p__Bacillota_I	c__Bacilli_A	o__RFN20	f__CAG-826	g__UBA2450	s__	0	0	0	276.309	277.219	286.769	288.649	276.012	224.567	336.55	203.16	244.091
RGMC.28931	d__Bacteria	p__Bacillota_I	c__Bacilli_A	o__RFN20	f__CAG-826	g__UBA2450	s__	0	0	0	0	0	0	142.601	0	131.487	165.395	152.129	0
RGMC.28964	d__Bacteria	p__Bacillota_I	c__Bacilli_A	o__RFN20	f__CAG-826	g__UBA2450	s__	0	0	0	0	0	0	0	0	150.318	205.933	174.925	0
RGMC.5210	d__Bacteria	p__Bacillota_I	c__Bacilli_A	o__RFN20	f__CAG-826	g__UBA3207	s__	0	0	0	0	0	0	810.238	891.506	612.509	852.012	572.363	0
RGMC.23885	d__Bacteria	p__Bacillota_I	c__Bacilli_A	o__RFN20	f__CAG-826	g__UBA3207	s__	0	0	0	0	0	0	435.576	505.653	359.601	784.606	618.001	599.361
RGMC.2383	d__Bacteria	p__Bacillota_I	c__Bacilli_A	o__RFN20	f__CAG-826	g__UBA3207	s__	0	0	0	301.812	230.542	292.342	415.3	478.31	333.938	536.709	360.36	383.005
RGMC.25616	d__Bacteria	p__Bacillota_I	c__Bacilli_A	o__RFN20	f__CAG-826	g__UBA3207	s__	0	111.238	0	219.925	197.765	203.193	356.906	463.695	332.101	599.504	422.888	293.704
RGMC.22302	d__Bacteria	p__Bacillota_I	c__Bacilli_A	o__RFN20	f__CAG-826	g__UBA3207	s__UBA3207 sp902768335	0	0	0	0	0	0	593.634	707.587	494.117	679.395	441.553	570.54
RGMC.21020	d__Bacteria	p__Bacillota_I	c__Bacilli_A	o__RFN20	f__CAG-826	g__UBA3207	s__UBA3207 sp902768335	0	0	0	0	0	0	0	424.939	317.528	532.18	404.861	0
RGMC.3725	d__Bacteria	p__Bacteroidota	c__Bacteroidia	o__Bacteroidales	f__Bacteroidaceae	g__Ga6A1	s__Ga6A1 sp900102385	0	0	0	0	0	0	0	177.043	0	260.195	0	0
RGMC.5944	d__Bacteria	p__Bacteroidota	c__Bacteroidia	o__Bacteroidales	f__Bacteroidaceae	g__Ga6A1	s__Ga6A1 sp900102385	0	0	0	0	0	0	0	0	0	274.221	0	0
RGMC.3470	d__Bacteria	p__Bacteroidota	c__Bacteroidia	o__Bacteroidales	f__Bacteroidaceae	g__Ga6A1	s__Ga6A1 sp900102385	0	0	0	0	0	0	0	175.839	0	252.157	0	0
RGMC.331	d__Bacteria	p__Bacteroidota	c__Bacteroidia	o__Bacteroidales	f__Bacteroidaceae	g__Ga6A1	s__Ga6A1 sp900102385	0	0	0	0	0	0	0	0	0	263.448	0	0
RGMC.3710	d__Bacteria	p__Bacteroidota	c__Bacteroidia	o__Bacteroidales	f__Bacteroidaceae	g__Ga6A1	s__Ga6A1 sp900102385	0	0	0	0	0	0	0	152.379	0	236.666	0	0
RGMC.5132	d__Bacteria	p__Bacteroidota	c__Bacteroidia	o__Bacteroidales	f__Bacteroidaceae	g__Ga6A1	s__Ga6A1 sp900102385	0	0	0	0	0	0	0	0	0	231.909	0	0
RGMC.10019	d__Bacteria	p__Bacteroidota	c__Bacteroidia	o__Bacteroidales	f__Bacteroidaceae	g__Ga6A1	s__Ga6A1 sp900102385	0	0	0	0	0	0	0	0	0	248.131	0	0
RGMC.3892	d__Bacteria	p__Bacteroidota	c__Bacteroidia	o__Bacteroidales	f__Bacteroidaceae	g__Ga6A1	s__Ga6A1 sp900102385	0	0	0	0	0	0	0	0	0	235.836	0	0
RGMC.3233	d__Bacteria	p__Bacteroidota	c__Bacteroidia	o__Bacteroidales	f__Bacteroidaceae	g__Ga6A1	s__Ga6A1 sp900102385	0	0	0	0	0	0	0	0	0	229.912	0	0
RGMC.5100	d__Bacteria	p__Bacteroidota	c__Bacteroidia	o__Bacteroidales	f__Bacteroidaceae	g__Ga6A1	s__Ga6A1 sp900102385	0	0	0	0	0	0	0	0	0	256.835	0	0
RGMC.5130	d__Bacteria	p__Bacteroidota	c__Bacteroidia	o__Bacteroidales	f__Bacteroidaceae	g__Ga6A1	s__Ga6A1 sp900102385	0	0	0	0	0	0	0	0	0	216.512	0	0
RGMC.3968	d__Bacteria	p__Bacteroidota	c__Bacteroidia	o__Bacteroidales	f__Bacteroidaceae	g__Ga6A1	s__Ga6A1 sp900102385	0	0	0	0	0	0	0	0	0	231.669	0	0
RGMC.15639	d__Bacteria	p__Bacteroidota	c__Bacteroidia	o__Bacteroidales	f__Bacteroidaceae	g__Ga6A1	s__Ga6A1 sp900102385	0	0	0	0	0	0	0	0	0	201.832	0	0
RGMC.4034	d__Bacteria	p__Bacteroidota	c__Bacteroidia	o__Bacteroidales	f__Bacteroidaceae	g__Ga6A1	s__Ga6A1 sp900102385	0	0	0	0	0	0	0	0	0	222.141	0	0
RGMC.15961	d__Bacteria	p__Bacteroidota	c__Bacteroidia	o__Bacteroidales	f__Bacteroidaceae	g__Ga6A1	s__Ga6A1 sp900102385	0	0	0	0	0	0	0	0	0	194.436	0	0
RGMC.29187	d__Bacteria	p__Bacteroidota	c__Bacteroidia	o__Bacteroidales	f__Bacteroidaceae	g__Ga6A1	s__Ga6A1 sp900102385	0	0	0	0	0	0	0	0	0	210.51	0	0
RGMC.5116	d__Bacteria	p__Bacteroidota	c__Bacteroidia	o__Bacteroidales	f__Bacteroidaceae	g__Ga6A1	s__Ga6A1 sp900102385	0	0	0	0	0	0	0	0	0	204.431	0	0
RGMC.21303	d__Bacteria	p__Bacteroidota	c__Bacteroidia	o__Bacteroidales	f__Bacteroidaceae	g__Ga6A1	s__Ga6A1 sp900102385	0	0	0	0	0	0	0	0	0	711.961	0	0
RGMC.4002	d__Bacteria	p__Bacteroidota	c__Bacteroidia	o__Bacteroidales	f__Bacteroidaceae	g__Ga6A1	s__Ga6A1 sp900102385	0	0	0	0	0	0	0	0	0	207.72	0	0
RGMC.3903	d__Bacteria	p__Bacteroidota	c__Bacteroidia	o__Bacteroidales	f__Bacteroidaceae	g__Ga6A1	s__Ga6A1 sp900102385	0	0	0	0	0	0	0	0	0	196.446	0	0
RGMC.3938	d__Bacteria	p__Bacteroidota	c__Bacteroidia	o__Bacteroidales	f__Bacteroidaceae	g__Ga6A1	s__Ga6A1 sp900102385	0	0	0	0	0	0	0	0	0	232.246	0	0
RGMC.869	d__Bacteria	p__Bacteroidota	c__Bacteroidia	o__Bacteroidales	f__Bacteroidaceae	g__Ga6A1	s__Ga6A1 sp900102385	0	0	0	0	0	0	0	0	0	205.632	0	0
RGMC.20921	d__Bacteria	p__Bacteroidota	c__Bacteroidia	o__Bacteroidales	f__Bacteroidaceae	g__Ga6A1	s__Ga6A1 sp900102385	0	0	0	0	0	0	0	0	0	221.592	0	0
RGMC.3503	d__Bacteria	p__Bacteroidota	c__Bacteroidia	o__Bacteroidales	f__Bacteroidaceae	g__Ga6A1	s__Ga6A1 sp900102385	0	0	0	0	0	0	0	0	0	203.153	0	0
RGMC.29424	d__Bacteria	p__Bacteroidota	c__Bacteroidia	o__Bacteroidales	f__Bacteroidaceae	g__Ga6A1	s__Ga6A1 sp900102385	0	0	0	0	0	0	0	0	0	326.368	0	0
RGMC.3676	d__Bacteria	p__Bacteroidota	c__Bacteroidia	o__Bacteroidales	f__Bacteroidaceae	g__Ga6A1	s__Ga6A1 sp900102385	0	0	0	0	0	0	0	0	0	194.312	0	0
RGMC.3236	d__Bacteria	p__Bacteroidota	c__Bacteroidia	o__Bacteroidales	f__Bacteroidaceae	g__Ga6A1	s__Ga6A1 sp900102385	0	0	0	0	0	0	0	0	0	201.831	0	0
RGMC.3654	d__Bacteria	p__Bacteroidota	c__Bacteroidia	o__Bacteroidales	f__Bacteroidaceae	g__Ga6A1	s__Ga6A1 sp900102385	0	0	0	0	0	0	0	0	0	212.207	0	0
RGMC.14326	d__Bacteria	p__Bacteroidota	c__Bacteroidia	o__Bacteroidales	f__Bacteroidaceae	g__Ga6A1	s__Ga6A1 sp900102385	0	0	0	0	0	0	0	0	0	189.191	0	0
RGMC.37751	d__Bacteria	p__Bacteroidota	c__Bacteroidia	o__Bacteroidales	f__Bacteroidaceae	g__Ga6A1	s__Ga6A1 sp900102385	0	0	0	0	0	0	0	0	0	296.639	0	0
RGMC.17049	d__Bacteria	p__Bacteroidota	c__Bacteroidia	o__Bacteroidales	f__Bacteroidaceae	g__Ga6A1	s__Ga6A1 sp900102385	0	0	0	0	0	0	0	0	0	269.135	0	0
RGMC.9457	d__Bacteria	p__Bacteroidota	c__Bacteroidia	o__Bacteroidales	f__Bacteroidaceae	g__Ga6A1	s__Ga6A1 sp900102385	0	0	0	0	0	0	0	0	0	266.187	0	0
RGMC.20087	d__Bacteria	p__Bacteroidota	c__Bacteroidia	o__Bacteroidales	f__Bacteroidaceae	g__Ga6A1	s__Ga6A1 sp900102385	0	0	0	0	0	0	0	0	0	261.822	0	0
RGMC.28592	d__Bacteria	p__Bacteroidota	c__Bacteroidia	o__Bacteroidales	f__Bacteroidaceae	g__Ga6A1	s__Ga6A1 sp900102385	0	0	0	0	0	0	0	0	0	254.951	0	0
RGMC.19601	d__Bacteria	p__Bacteroidota	c__Bacteroidia	o__Bacteroidales	f__Bacteroidaceae	g__Ga6A1	s__Ga6A1 sp900102385	0	0	0	0	0	0	0	0	0	252.612	0	0
RGMC.20394	d__Bacteria	p__Bacteroidota	c__Bacteroidia	o__Bacteroidales	f__Bacteroidaceae	g__Ga6A1	s__Ga6A1 sp900102385	0	0	0	0	0	0	0	0	0	250.722	0	0
RGMC.20277	d__Bacteria	p__Bacteroidota	c__Bacteroidia	o__Bacteroidales	f__Bacteroidaceae	g__Ga6A1	s__Ga6A1 sp900102385	0	0	0	0	0	0	0	0	0	246.379	0	0
RGMC.20879	d__Bacteria	p__Bacteroidota	c__Bacteroidia	o__Bacteroidales	f__Bacteroidaceae	g__Ga6A1	s__Ga6A1 sp900102385	0	0	0	0	0	0	0	0	0	245.558	0	0
RGMC.19155	d__Bacteria	p__Bacteroidota	c__Bacteroidia	o__Bacteroidales	f__Bacteroidaceae	g__Ga6A1	s__Ga6A1 sp900102385	0	0	0	0	0	0	0	0	0	244.769	0	0
RGMC.23642	d__Bacteria	p__Bacteroidota	c__Bacteroidia	o__Bacteroidales	f__Bacteroidaceae	g__Ga6A1	s__Ga6A1 sp900102385	0	0	0	0	0	0	0	0	0	234.72	0	0
RGMC.22070	d__Bacteria	p__Bacteroidota	c__Bacteroidia	o__Bacteroidales	f__Bacteroidaceae	g__Ga6A1	s__Ga6A1 sp900102385	0	0	0	0	0	0	0	0	0	231.635	0	0
RGMC.6973	d__Bacteria	p__Bacteroidota	c__Bacteroidia	o__Bacteroidales	f__Bacteroidaceae	g__Ga6A1	s__Ga6A1 sp900102385	0	0	0	0	0	0	0	0	0	230.671	0	0
RGMC.20936	d__Bacteria	p__Bacteroidota	c__Bacteroidia	o__Bacteroidales	f__Bacteroidaceae	g__Ga6A1	s__Ga6A1 sp900102385	0	0	0	0	0	0	0	0	0	230.201	0	0
RGMC.19561	d__Bacteria	p__Bacteroidota	c__Bacteroidia	o__Bacteroidales	f__Bacteroidaceae	g__Ga6A1	s__Ga6A1 sp900102385	0	0	0	0	0	0	0	0	0	227.942	0	0
RGMC.15518	d__Bacteria	p__Bacteroidota	c__Bacteroidia	o__Bacteroidales	f__Bacteroidaceae	g__Ga6A1	s__Ga6A1 sp900102385	0	0	0	0	0	0	0	0	0	225.489	0	0
RGMC.21635	d__Bacteria	p__Bacteroidota	c__Bacteroidia	o__Bacteroidales	f__Bacteroidaceae	g__Ga6A1	s__Ga6A1 sp900102385	0	0	0	0	0	0	0	0	0	223.487	0	0
RGMC.20120	d__Bacteria	p__Bacteroidota	c__Bacteroidia	o__Bacteroidales	f__Bacteroidaceae	g__Ga6A1	s__Ga6A1 sp900102385	0	0	0	0	0	0	0	0	0	220.333	0	0
RGMC.20459	d__Bacteria	p__Bacteroidota	c__Bacteroidia	o__Bacteroidales	f__Bacteroidaceae	g__Ga6A1	s__Ga6A1 sp900102385	0	0	0	0	0	0	0	0	0	220.104	0	0
RGMC.3861	d__Bacteria	p__Bacteroidota	c__Bacteroidia	o__Bacteroidales	f__Bacteroidaceae	g__Ga6A1	s__Ga6A1 sp900102385	0	0	0	0	0	0	0	0	0	216.27	0	0
RGMC.12977	d__Bacteria	p__Bacteroidota	c__Bacteroidia	o__Bacteroidales	f__Bacteroidaceae	g__Ga6A1	s__Ga6A1 sp900102385	0	0	0	0	0	0	0	0	0	213.948	0	0
RGMC.20318	d__Bacteria	p__Bacteroidota	c__Bacteroidia	o__Bacteroidales	f__Bacteroidaceae	g__Ga6A1	s__Ga6A1 sp900102385	0	0	0	0	0	0	0	0	0	207.011	0	0
RGMC.20989	d__Bacteria	p__Bacteroidota	c__Bacteroidia	o__Bacteroidales	f__Bacteroidaceae	g__Ga6A1	s__Ga6A1 sp900102385	0	0	0	0	0	0	0	0	0	203.22	0	0
RGMC.765	d__Bacteria	p__Bacteroidota	c__Bacteroidia	o__Bacteroidales	f__Bacteroidaceae	g__Ga6A1	s__Ga6A1 sp900102385	0	0	0	0	0	0	0	0	0	199.518	0	0
RGMC.3819	d__Bacteria	p__Bacteroidota	c__Bacteroidia	o__Bacteroidales	f__Bacteroidaceae	g__Ga6A1	s__Ga6A1 sp900102385	0	0	0	0	0	0	0	0	0	198.533	0	0
RGMC.20042	d__Bacteria	p__Bacteroidota	c__Bacteroidia	o__Bacteroidales	f__Bacteroidaceae	g__Ga6A1	s__Ga6A1 sp900102385	0	0	0	0	0	0	0	0	0	194.247	0	0
RGMC.20664	d__Bacteria	p__Bacteroidota	c__Bacteroidia	o__Bacteroidales	f__Bacteroidaceae	g__Ga6A1	s__Ga6A1 sp900102385	0	0	0	0	0	0	0	0	0	192.784	0	0
RGMC.1666	d__Bacteria	p__Bacteroidota	c__Bacteroidia	o__Bacteroidales	f__Bacteroidaceae	g__Ga6A1	s__Ga6A1 sp900102385	0	0	0	0	0	0	0	0	0	191.749	0	0
RGMC.4008	d__Bacteria	p__Bacteroidota	c__Bacteroidia	o__Bacteroidales	f__Bacteroidaceae	g__Ga6A1	s__Ga6A1 sp900102385	0	0	0	0	0	0	0	0	0	190.988	0	0
RGMC.20836	d__Bacteria	p__Bacteroidota	c__Bacteroidia	o__Bacteroidales	f__Bacteroidaceae	g__Ga6A1	s__Ga6A1 sp900102385	0	0	0	0	0	0	0	0	0	189.143	0	0
RGMC.20688	d__Bacteria	p__Bacteroidota	c__Bacteroidia	o__Bacteroidales	f__Bacteroidaceae	g__Ga6A1	s__Ga6A1 sp900102385	0	0	0	0	0	0	0	0	0	182.085	0	0
RGMC.39912	d__Bacteria	p__Bacteroidota	c__Bacteroidia	o__Bacteroidales	f__Bacteroidaceae	g__Prevotella	s__	4925.65	4202.85	4991.19	4884.41	4370.73	4991.95	6665.41	6765.55	6079.47	6508.92	5286.67	5093.64
RGMC.28969	d__Bacteria	p__Bacteroidota	c__Bacteroidia	o__Bacteroidales	f__Bacteroidaceae	g__Prevotella	s__	4476.74	3813.49	4230.46	4723.81	4587.92	4629.91	5502.87	6173.64	4942.24	6116.55	4603.5	4097.6
RGMC.27596	d__Bacteria	p__Bacteroidota	c__Bacteroidia	o__Bacteroidales	f__Bacteroidaceae	g__Prevotella	s__	0	0	0	0	0	0	0	0	388.166	393.463	0	398.738
RGMC.10794	d__Bacteria	p__Bacteroidota	c__Bacteroidia	o__Bacteroidales	f__Bacteroidaceae	g__Prevotella	s__	0	0	0	127.349	0	110.82	181.57	186.718	166.751	248.427	165.69	127.207
RGMC.38189	d__Bacteria	p__Bacteroidota	c__Bacteroidia	o__Bacteroidales	f__Bacteroidaceae	g__Prevotella	s__	0	0	0	0	0	0	120.035	127.57	114.014	171.316	104.512	0
RGMC.23709	d__Bacteria	p__Bacteroidota	c__Bacteroidia	o__Bacteroidales	f__Bacteroidaceae	g__Prevotella	s__	0	0	0	0	0	0	0	0	0	0	0	0
RGMC.27406	d__Bacteria	p__Bacteroidota	c__Bacteroidia	o__Bacteroidales	f__Bacteroidaceae	g__Prevotella	s__	0	0	0	0	0	0	0	0	0	0	0	0
RGMC.95	d__Bacteria	p__Bacteroidota	c__Bacteroidia	o__Bacteroidales	f__Bacteroidaceae	g__Prevotella	s__Prevotella sp016286575	0	0	0	0	0	0	327.983	0	409.406	1016.61	1393.09	0
RGMC.1431	d__Bacteria	p__Bacteroidota	c__Bacteroidia	o__Bacteroidales	f__Bacteroidaceae	g__Prevotella	s__Prevotella sp016286575	0	0	0	0	0	0	188.395	128.974	192.962	161.449	186.04	114.823
RGMC.29524	d__Bacteria	p__Bacteroidota	c__Bacteroidia	o__Bacteroidales	f__Bacteroidaceae	g__Prevotella	s__Prevotella sp016286575	0	0	0	0	0	0	0	0	0	0	0	0
RGMC.96	d__Bacteria	p__Bacteroidota	c__Bacteroidia	o__Bacteroidales	f__Bacteroidaceae	g__Prevotella	s__Prevotella sp016286585	1271.96	2339.19	1620.32	2003.89	2056.82	1682.75	2275.07	2310.8	2427.78	2591.52	2472.96	2437.8
RGMC.25897	d__Bacteria	p__Bacteroidota	c__Bacteroidia	o__Bacteroidales	f__Bacteroidaceae	g__Prevotella	s__Prevotella sp016286585	753.824	922.341	816.43	940.029	753.74	946.021	1530.31	1241.49	1711.89	1357.15	1448.02	1128.43
RGMC.28747	d__Bacteria	p__Bacteroidota	c__Bacteroidia	o__Bacteroidales	f__Bacteroidaceae	g__Prevotella	s__Prevotella sp016286585	869.685	1258.98	1170.06	1532.91	1773.08	905.528	1098.35	1053.42	1247.83	1240.2	1342.37	1109.72
RGMC.10921	d__Bacteria	p__Bacteroidota	c__Bacteroidia	o__Bacteroidales	f__Bacteroidaceae	g__Prevotella	s__Prevotella sp017447515	0	0	0	0	0	0	0	0	0	0	169.15	0
RGMC.12698	d__Bacteria	p__Bacteroidota	c__Bacteroidia	o__Bacteroidales	f__Bacteroidaceae	g__Prevotella	s__Prevotella sp017447515	0	0	0	0	0	0	0	0	0	0	0	0
RGMC.14183	d__Bacteria	p__Bacteroidota	c__Bacteroidia	o__Bacteroidales	f__Bacteroidaceae	g__Prevotella	s__Prevotella sp017474485	301.557	180.366	220.538	377.79	349.757	336.249	448.938	357.472	482.106	382.546	450.114	443.13
RGMC.16133	d__Bacteria	p__Bacteroidota	c__Bacteroidia	o__Bacteroidales	f__Bacteroidaceae	g__Prevotella	s__Prevotella sp017550455	0	137.265	165.486	175.51	173.138	188.286	297.601	226.121	239.286	311.961	268.32	219.044
RGMC.14774	d__Bacteria	p__Bacteroidota	c__Bacteroidia	o__Bacteroidales	f__Bacteroidaceae	g__Prevotella	s__Prevotella sp017550455	0	0	0	0	0	125.642	198.271	146.784	154.554	194.61	175.061	157.804
RGMC.19500	d__Bacteria	p__Bacteroidota	c__Bacteroidia	o__Bacteroidales	f__Bacteroidaceae	g__Prevotella	s__Prevotella sp900109055	193.419	194.46	171.195	276.188	279.498	276.32	767.289	604.619	809.524	684.733	759.93	525.094
RGMC.19409	d__Bacteria	p__Bacteroidota	c__Bacteroidia	o__Bacteroidales	f__Bacteroidaceae	g__Prevotella	s__Prevotella sp900109055	186.285	265.392	223.345	435.49	633.806	270.023	642.393	573.948	708.06	816.208	1111.96	491.134
RGMC.19544	d__Bacteria	p__Bacteroidota	c__Bacteroidia	o__Bacteroidales	f__Bacteroidaceae	g__Prevotella	s__Prevotella sp900109055	163.83	169.453	148.989	236.54	239.78	230.605	654.999	505.941	686.466	572.117	651.099	449.543
RGMC.147	d__Bacteria	p__Bacteroidota	c__Bacteroidia	o__Bacteroidales	f__Bacteroidaceae	g__Prevotella	s__Prevotella sp900109055	139.144	132.155	0	193.544	193.342	179.718	479.726	381.72	517.102	441.312	478.958	327.862
RGMC.500	d__Bacteria	p__Bacteroidota	c__Bacteroidia	o__Bacteroidales	f__Bacteroidaceae	g__Prevotella	s__Prevotella sp900109055	0	120.754	0	164.065	158.278	163.784	457.571	360.957	490.716	402.206	442.278	330.69
RGMC.19518	d__Bacteria	p__Bacteroidota	c__Bacteroidia	o__Bacteroidales	f__Bacteroidaceae	g__Prevotella	s__Prevotella sp900315105	0	0	578.244	689.082	509.238	646.693	605.547	622.219	807.316	804.376	622.387	859.956
RGMC.2057	d__Bacteria	p__Bacteroidota	c__Bacteroidia	o__Bacteroidales	f__Bacteroidaceae	g__Prevotella	s__Prevotella sp900315105	0	0	303.689	390.828	329.455	369.236	332.673	351.146	446.579	507.959	380.866	435.71
RGMC.1837	d__Bacteria	p__Bacteroidota	c__Bacteroidia	o__Bacteroidales	f__Bacteroidaceae	g__Prevotella	s__Prevotella sp900315105	0	0	0	313.886	0	304.193	276.126	0	361.189	391.562	291.263	351.139
RGMC.19626	d__Bacteria	p__Bacteroidota	c__Bacteroidia	o__Bacteroidales	f__Bacteroidaceae	g__Prevotella	s__Prevotella sp902780635	0	0	0	0	0	0	0	0	0	0	0	0
RGMC.1476	d__Bacteria	p__Bacteroidota	c__Bacteroidia	o__Bacteroidales	f__Bacteroidaceae	g__Prevotella	s__Prevotella sp902799765	0	0	0	120.345	0	118.845	242.248	185.595	239.467	180.603	187.622	157.364
RGMC.19079	d__Bacteria	p__Bacteroidota	c__Bacteroidia	o__Bacteroidales	f__Bacteroidaceae	g__Prevotella	s__Prevotella sp902799765	0	0	0	0	0	105.438	212.534	162.261	203.481	163.919	167.911	138.153
RGMC.21391	d__Bacteria	p__Bacteroidota	c__Bacteroidia	o__Bacteroidales	f__Bacteroidaceae	g__Prevotella	s__Prevotella sp902799765	0	0	0	0	0	0	169.119	132.19	161.008	128.552	131.691	0
RGMC.15428	d__Bacteria	p__Bacteroidota	c__Bacteroidia	o__Bacteroidales	f__Bacteroidaceae	g__Prevotella	s__Prevotella sp902800435	609.539	864.063	906.654	847.882	745.527	831.136	1210.23	993.49	1063.25	1028.01	1067.02	1040.42
RGMC.29899	d__Bacteria	p__Bacteroidota	c__Bacteroidia	o__Bacteroidales	f__Bacteroidaceae	g__Prevotella	s__Prevotella sp902800435	488.975	586.259	594.242	557.355	447.208	537.03	776.799	632.167	662.616	641.757	596.054	646.11
RGMC.2013	d__Bacteria	p__Bacteroidota	c__Bacteroidia	o__Bacteroidales	f__Bacteroidaceae	g__Prevotella	s__Prevotella sp902801155	0	0	264.84	317.053	258.697	315.126	307.029	302.511	382.754	400.718	294.999	389.526
RGMC.17237	d__Bacteria	p__Bacteroidota	c__Bacteroidia	o__Bacteroidales	f__Bacteroidaceae	g__Prevotella	s__Prevotella sp902801155	0	0	240.224	317.783	271.211	297.411	271.99	292.055	356.643	416.493	311.255	346.465
RGMC.21509	d__Bacteria	p__Bacteroidota	c__Bacteroidia	o__Bacteroidales	f__Bacteroidaceae	g__Prevotella	s__Prevotella sp902801155	0	0	224.213	289.18	245.354	278.484	253.695	270.773	327.168	372.345	272.785	326.573
RGMC.19435	d__Bacteria	p__Bacteroidota	c__Bacteroidia	o__Bacteroidales	f__Bacteroidaceae	g__Prevotella	s__Prevotella sp902801155	0	0	194.472	259.412	219.781	246.779	224.965	238.655	297.398	338.189	246.375	283.12
RGMC.9465	d__Bacteria	p__Bacteroidota	c__Bacteroidia	o__Bacteroidales	f__Bacteroidaceae	g__Prevotella	s__Prevotella sp902801155	0	0	192.982	247.76	208.925	238.978	232.89	230.211	281.966	325.39	237.397	284.156
RGMC.9091	d__Bacteria	p__Bacteroidota	c__Bacteroidia	o__Bacteroidales	f__Bacteroidaceae	g__Prevotella	s__Prevotella sp902801155	0	0	182.034	242.238	202.861	228.174	217.198	224.594	275.503	313.152	237.222	269.704
RGMC.38624	d__Bacteria	p__Bacteroidota	c__Bacteroidia	o__Bacteroidales	f__Bacteroidaceae	g__Prevotella	s__Prevotella sp902801155	0	0	0	246.184	0	232.528	218.549	230.985	281.689	320.388	232.203	275.212
RGMC.37782	d__Bacteria	p__Bacteroidota	c__Bacteroidia	o__Bacteroidales	f__Bacteroidaceae	g__Prevotella	s__Prevotella sp902801155	0	0	0	230.349	0	216.396	199.595	212.021	265.769	293.667	222.304	253.731
RGMC.39976	d__Bacteria	p__Bacteroidota	c__Bacteroidia	o__Bacteroidales	f__Bacteroidaceae	g__Prevotella	s__Prevotella sp902801155	0	0	0	227.422	0	217.578	194.6	200.012	253.314	286.934	214.11	247.725
RGMC.38684	d__Bacteria	p__Bacteroidota	c__Bacteroidia	o__Bacteroidales	f__Bacteroidaceae	g__Prevotella	s__Prevotella sp902801155	0	0	0	229.246	0	218.83	203.696	0	264.077	304.466	228.529	247.532
RGMC.1840	d__Bacteria	p__Bacteroidota	c__Bacteroidia	o__Bacteroidales	f__Bacteroidaceae	g__Prevotella	s__Prevotella sp946185285	0	0	0	0	0	0	0	0	0	0	0	0
RGMC.9025	d__Bacteria	p__Bacteroidota	c__Bacteroidia	o__Bacteroidales	f__Bacteroidaceae	g__Prevotella	s__Prevotella sp946188395	160.605	117.889	0	138.28	0	125.326	157.522	141.023	155.114	160.328	143.19	130.911
RGMC.9311	d__Bacteria	p__Bacteroidota	c__Bacteroidia	o__Bacteroidales	f__Bacteroidaceae	g__Prevotella	s__Prevotella sp946188395	147.037	108.445	0	130.212	0	114.311	150.026	0	144.086	149.304	132.771	0
RGMC.29335	d__Bacteria	p__Bacteroidota	c__Bacteroidia	o__Bacteroidales	f__Bacteroidaceae	g__UBA1179	s__	2060.77	2174.79	2708.4	3937.97	3948.42	3848.88	5196.69	4190.05	5494.41	6017.22	5694.01	4187.55
RGMC.25745	d__Bacteria	p__Bacteroidota	c__Bacteroidia	o__Bacteroidales	f__Bacteroidaceae	g__UBA1179	s__	924.993	939.113	1109.35	1695.61	1765.35	1660.79	2147.07	1772.61	2315.43	2554.43	2402.72	1702.63
RGMC.29518	d__Bacteria	p__Bacteroidota	c__Bacteroidia	o__Bacteroidales	f__Bacteroidaceae	g__UBA1179	s__	251.817	276.098	386.015	655.483	627.681	612.078	855.856	747.267	979.898	926.474	964.455	557.882
RGMC.8814	d__Bacteria	p__Bacteroidota	c__Bacteroidia	o__Bacteroidales	f__Bacteroidaceae	g__UBA1179	s__	0	0	0	0	0	0	0	0	272.841	0	286.204	0
RGMC.39639	d__Bacteria	p__Bacteroidota	c__Bacteroidia	o__Bacteroidales	f__Bacteroidaceae	g__UBA1179	s__	0	0	0	0	0	0	0	0	0	0	0	0
RGMC.14305	d__Bacteria	p__Bacteroidota	c__Bacteroidia	o__Bacteroidales	f__Bacteroidaceae	g__UBA1179	s__UBA1179 sp017530735	349.048	171.293	139.445	243.721	275.288	218.637	287.773	197.121	351.718	370.957	413.525	225.855
RGMC.15159	d__Bacteria	p__Bacteroidota	c__Bacteroidia	o__Bacteroidales	f__Bacteroidaceae	g__UBA1179	s__UBA1179 sp017530735	336.687	166.887	141.375	229.164	273.642	208.647	274.376	188.004	328.454	352.097	395.001	226.077
RGMC.9363	d__Bacteria	p__Bacteroidota	c__Bacteroidia	o__Bacteroidales	f__Bacteroidaceae	g__UBA1179	s__UBA1179 sp017530735	308.414	153.205	131.258	216.378	239.162	196.286	279.306	189.3	322.947	333.273	365.018	219.372
RGMC.3459	d__Bacteria	p__Bacteroidota	c__Bacteroidia	o__Bacteroidales	f__Bacteroidaceae	g__UBA1179	s__UBA1179 sp017530735	312.196	145.913	124.905	200.2	233.17	185.125	259.002	170.803	300.962	319.295	347.006	198.697
RGMC.40396	d__Bacteria	p__Bacteroidota	c__Bacteroidia	o__Bacteroidales	f__Bacteroidaceae	g__UBA1179	s__UBA1179 sp017530735	269.486	132.894	0	194.703	208.49	177.174	247.889	165.905	291.824	294.388	334.613	194.019
RGMC.20852	d__Bacteria	p__Bacteroidota	c__Bacteroidia	o__Bacteroidales	f__Bacteroidaceae	g__UBA1179	s__UBA1179 sp902763885	0	0	0	355.007	0	327.725	444.144	388.103	523.419	530.443	563.04	293.308
RGMC.40299	d__Bacteria	p__Bacteroidota	c__Bacteroidia	o__Bacteroidales	f__Bacteroidaceae	g__UBA1179	s__UBA1179 sp902763885	0	0	0	218.124	221.747	199.281	272.249	233.949	314.373	319.868	334.282	183.459
RGMC.39740	d__Bacteria	p__Bacteroidota	c__Bacteroidia	o__Bacteroidales	f__Bacteroidaceae	g__UBA1179	s__UBA1179 sp902763885	0	0	0	141.351	0	130.542	185.567	160.763	216.153	199.617	204.546	126.974
RGMC.40467	d__Bacteria	p__Bacteroidota	c__Bacteroidia	o__Bacteroidales	f__Bacteroidaceae	g__UBA1179	s__UBA1179 sp902763885	0	0	0	0	0	91.3521	131.99	116.468	158.344	140.846	144.936	0
RGMC.8994	d__Bacteria	p__Bacteroidota	c__Bacteroidia	o__Bacteroidales	f__Bacteroidaceae	g__UBA1179	s__UBA1179 sp902779875	0	0	0	140.964	140.097	126.334	270.466	174.728	303.571	275.197	344.118	196.919
RGMC.23168	d__Bacteria	p__Bacteroidota	c__Bacteroidia	o__Bacteroidales	f__Bacteroidaceae	g__UBA1179	s__UBA1179 sp902779875	0	0	0	132.967	131.647	119.863	258.956	161.231	283.508	262.084	335.774	180.656
RGMC.19546	d__Bacteria	p__Bacteroidota	c__Bacteroidia	o__Bacteroidales	f__Bacteroidaceae	g__UBA1179	s__UBA1179 sp902779875	0	0	0	0	0	0	190.223	0	220.669	215.271	279.292	137.537
RGMC.40117	d__Bacteria	p__Bacteroidota	c__Bacteroidia	o__Bacteroidales	f__Bacteroidaceae	g__UBA1179	s__UBA1179 sp902782245	767.788	420.312	463.068	716.683	815.107	639.676	853.903	742.455	1002.72	1109.66	1095.85	645.26
RGMC.23951	d__Bacteria	p__Bacteroidota	c__Bacteroidia	o__Bacteroidales	f__Bacteroidaceae	g__UBA1179	s__UBA1179 sp902782245	552.967	310.872	346.679	524.265	634.332	473.665	614.566	534.732	742.427	838.044	855.22	476.463
RGMC.18642	d__Bacteria	p__Bacteroidota	c__Bacteroidia	o__Bacteroidales	f__Bacteroidaceae	g__UBA1179	s__UBA1179 sp902782245	375.683	203.679	226.528	341.656	367.298	312.284	405.822	351.811	473.041	515.348	477.615	322.881
RGMC.19783	d__Bacteria	p__Bacteroidota	c__Bacteroidia	o__Bacteroidales	f__Bacteroidaceae	g__UBA1179	s__UBA1179 sp902782245	283.426	153.914	175.889	262.933	282.208	233.38	309.213	268.006	368.906	391.7	380.577	250.897
RGMC.1608	d__Bacteria	p__Bacteroidota	c__Bacteroidia	o__Bacteroidales	f__Bacteroidaceae	g__UBA1179	s__UBA1179 sp902782245	258.26	142.844	159.05	242.471	250.772	219.704	299.428	250.67	342.968	364.322	339.346	224.861
RGMC.10696	d__Bacteria	p__Bacteroidota	c__Bacteroidia	o__Bacteroidales	f__Bacteroidaceae	g__UBA1179	s__UBA1179 sp902782245	184.415	0	0	190.507	208.386	168.83	238.817	199.869	288.777	294.126	297.462	194.997
RGMC.14914	d__Bacteria	p__Bacteroidota	c__Bacteroidia	o__Bacteroidales	f__Bacteroidaceae	g__UBA1179	s__UBA1179 sp902782245	187.427	0	0	171.08	0	160.712	222.951	184.526	266.997	264.229	258.276	175.983
RGMC.38456	d__Bacteria	p__Bacteroidota	c__Bacteroidia	o__Bacteroidales	f__Bacteroidaceae	g__UBA1179	s__UBA1179 sp902782245	181.109	0	0	164.999	168.16	149.211	209.248	178.988	237.645	256.556	236.547	177.133
RGMC.31045	d__Bacteria	p__Bacteroidota	c__Bacteroidia	o__Bacteroidales	f__Bacteroidaceae	g__UBA1179	s__UBA1179 sp902782245	168.786	0	0	167.639	178.989	149.251	199.29	172.835	230.799	257.399	243.887	162.688
RGMC.36456	d__Bacteria	p__Bacteroidota	c__Bacteroidia	o__Bacteroidales	f__Bacteroidaceae	g__UBA1179	s__UBA1179 sp902782245	134.421	0	0	130.144	135.824	111.543	146.136	128.71	166.579	188.251	175.375	111.651
RGMC.748	d__Bacteria	p__Bacteroidota	c__Bacteroidia	o__Bacteroidales	f__Bacteroidaceae	g__UBA1786	s__UBA1786 sp024682395	439.433	204.527	283.832	376.127	466.669	340.029	161.265	197.348	199.233	618.07	260.031	234.396
RGMC.10008	d__Bacteria	p__Bacteroidota	c__Bacteroidia	o__Bacteroidales	f__Bacteroidaceae	g__UBA1786	s__UBA1786 sp024682395	423.56	196.541	263.822	343.03	403.806	322.114	167.158	195.139	190.012	592.933	239.63	242.541
RGMC.32	d__Bacteria	p__Bacteroidota	c__Bacteroidia	o__Bacteroidales	f__Bacteroidaceae	g__UBA2918	s__UBA2918 sp017427065	438.41	397.072	476.596	520.763	523.516	526.156	678.116	549.641	614.237	755.379	683.486	562.93
RGMC.12316	d__Bacteria	p__Bacteroidota	c__Bacteroidia	o__Bacteroidales	f__Bacteroidaceae	g__UBA2918	s__UBA2918 sp017427065	353.995	347.435	403.244	483.817	513.229	474.889	616.697	510.88	551.728	739.287	667.726	461.692
RGMC.12736	d__Bacteria	p__Bacteroidota	c__Bacteroidia	o__Bacteroidales	f__Bacteroidaceae	g__UBA2918	s__UBA2918 sp017442855	0	0	0	0	0	252.42	367.745	0	373.49	459.494	0	316.723
RGMC.2182	d__Bacteria	p__Bacteroidota	c__Bacteroidia	o__Bacteroidales	f__Bacteroidaceae	g__UBA2918	s__UBA2918 sp900313715	0	0	0	0	0	0	284.88	0	256.919	291.546	0	228.232
RGMC.2105	d__Bacteria	p__Bacteroidota	c__Bacteroidia	o__Bacteroidales	f__Bacteroidaceae	g__UBA2918	s__UBA2918 sp900313715	0	0	0	0	0	0	223.971	0	205.229	249.42	155.799	174.421
RGMC.4293	d__Bacteria	p__Bacteroidota	c__Bacteroidia	o__Bacteroidales	f__Bacteroidaceae	g__UBA2918	s__UBA2918 sp900313715	0	0	0	0	0	0	142.223	0	136.287	183.177	0	0
RGMC.40311	d__Bacteria	p__Bacteroidota	c__Bacteroidia	o__Bacteroidales	f__Bacteroidaceae	g__UBA2918	s__UBA2918 sp946407325	2160.46	1625.13	1583	1995.27	1778.15	1894.78	2569.05	1794.23	2417.95	2977.01	2040.8	2338.43
RGMC.2247	d__Bacteria	p__Bacteroidota	c__Bacteroidia	o__Bacteroidales	f__Bacteroidaceae	g__UBA2918	s__UBA2918 sp946407325	1355.01	922.189	810.119	1076.62	913.158	1021.9	1422.03	954.19	1367.73	1655.33	1072.06	1280.56
RGMC.40795	d__Bacteria	p__Bacteroidota	c__Bacteroidia	o__Bacteroidales	f__Bacteroidaceae	g__UBA3839	s__	1164.4	767.288	917.956	806.622	779.004	818.236	726.29	757.88	505.499	781.465	491.294	674.745
RGMC.12636	d__Bacteria	p__Bacteroidota	c__Bacteroidia	o__Bacteroidales	f__Bacteroidaceae	g__UBA4334	s__UBA4334 sp017448965	0	0	239.092	231.082	277.792	248.64	196.725	274.737	177.244	330.544	0	180.609
RGMC.9461	d__Bacteria	p__Bacteroidota	c__Bacteroidia	o__Bacteroidales	f__Bacteroidaceae	g__UBA4334	s__UBA4334 sp017450985	0	258.103	175.874	325.246	287.796	204.339	613.87	436.009	929.737	1201.72	630.492	410.25
RGMC.12801	d__Bacteria	p__Bacteroidota	c__Bacteroidia	o__Bacteroidales	f__Bacteroidaceae	g__UBA4334	s__UBA4334 sp017450985	0	149.03	0	169.534	0	0	379.061	257.346	524.354	622.348	326.871	250.095
RGMC.37355	d__Bacteria	p__Bacteroidota	c__Bacteroidia	o__Bacteroidales	f__Bacteroidaceae	g__UBA4372	s__	264.813	175.566	174.185	347.468	254.501	324.763	263.949	198.412	388.778	311.151	175.856	286.274
RGMC.39426	d__Bacteria	p__Bacteroidota	c__Bacteroidia	o__Bacteroidales	f__Bacteroidaceae	g__UBA4372	s__	169.889	178.51	183.394	228.369	199.806	236.416	374.277	307.177	291.578	403.711	286.856	283.999
RGMC.29645	d__Bacteria	p__Bacteroidota	c__Bacteroidia	o__Bacteroidales	f__Bacteroidaceae	g__UBA4372	s__	153.708	175.088	182.227	217.686	188.065	223.562	346.26	287.051	273.043	377.965	267.549	325.719
RGMC.39993	d__Bacteria	p__Bacteroidota	c__Bacteroidia	o__Bacteroidales	f__Bacteroidaceae	g__UBA4372	s__	128.787	143.767	139.066	183.995	163.589	193.374	301.513	242.527	236.168	332.167	227.366	218.272
RGMC.27547	d__Bacteria	p__Bacteroidota	c__Bacteroidia	o__Bacteroidales	f__Bacteroidaceae	g__UBA4372	s__	0	0	0	0	0	0	291.27	221.233	290.808	284.121	299.83	0
RGMC.21741	d__Bacteria	p__Bacteroidota	c__Bacteroidia	o__Bacteroidales	f__Bacteroidaceae	g__UBA4372	s__	0	104.199	128.133	154.8	174.892	157.819	0	0	0	134.533	107.642	0
RGMC.39509	d__Bacteria	p__Bacteroidota	c__Bacteroidia	o__Bacteroidales	f__Bacteroidaceae	g__UBA4372	s__	0	0	0	0	0	0	0	0	0	0	0	0
RGMC.12314	d__Bacteria	p__Bacteroidota	c__Bacteroidia	o__Bacteroidales	f__Bacteroidaceae	g__UBA4372	s__UBA4372 sp017427185	0	0	0	0	0	0	227.968	0	179.971	204.023	183.837	181.417
RGMC.10779	d__Bacteria	p__Bacteroidota	c__Bacteroidia	o__Bacteroidales	f__Bacteroidaceae	g__UBA4372	s__UBA4372 sp017427185	0	0	0	0	0	0	185.036	0	152.431	173.941	160.567	151.465
RGMC.15221	d__Bacteria	p__Bacteroidota	c__Bacteroidia	o__Bacteroidales	f__Bacteroidaceae	g__UBA4372	s__UBA4372 sp017427185	0	0	0	0	0	0	150.576	0	0	0	0	0
RGMC.15283	d__Bacteria	p__Bacteroidota	c__Bacteroidia	o__Bacteroidales	f__Bacteroidaceae	g__UBA4372	s__UBA4372 sp017427185	0	0	0	0	0	0	0	0	0	0	0	0
RGMC.31	d__Bacteria	p__Bacteroidota	c__Bacteroidia	o__Bacteroidales	f__Bacteroidaceae	g__UBA4372	s__UBA4372 sp017427185	0	0	0	0	0	0	0	0	0	0	0	0
RGMC.15550	d__Bacteria	p__Bacteroidota	c__Bacteroidia	o__Bacteroidales	f__Bacteroidaceae	g__UBA4372	s__UBA4372 sp017427185	0	0	0	0	0	0	0	0	0	0	0	0
RGMC.2372	d__Bacteria	p__Bacteroidota	c__Bacteroidia	o__Bacteroidales	f__Bacteroidaceae	g__UBA4372	s__UBA4372 sp017427185	0	0	0	0	0	0	0	0	0	0	0	0
RGMC.12281	d__Bacteria	p__Bacteroidota	c__Bacteroidia	o__Bacteroidales	f__Bacteroidaceae	g__UBA4372	s__UBA4372 sp017427185	0	0	0	0	0	0	0	0	0	0	0	0
RGMC.13663	d__Bacteria	p__Bacteroidota	c__Bacteroidia	o__Bacteroidales	f__Bacteroidaceae	g__UBA4372	s__UBA4372 sp017427185	0	0	0	0	0	0	0	0	0	0	0	0
RGMC.405	d__Bacteria	p__Bacteroidota	c__Bacteroidia	o__Bacteroidales	f__Bacteroidaceae	g__UBA4372	s__UBA4372 sp024680695	427.106	383.28	298.623	563.543	410.9	506.211	405.053	240.861	531.093	278.208	281.016	264.767
RGMC.653	d__Bacteria	p__Bacteroidota	c__Bacteroidia	o__Bacteroidales	f__Bacteroidaceae	g__UBA4372	s__UBA4372 sp024697945	389.82	357.722	398.098	542.418	484.077	522.232	391.385	377.215	287.675	392.23	228.408	347.215
RGMC.688	d__Bacteria	p__Bacteroidota	c__Bacteroidia	o__Bacteroidales	f__Bacteroidaceae	g__UBA4372	s__UBA4372 sp024698925	201.634	212.055	225.405	328.185	284.178	344.352	884.582	658.294	876.928	801.055	848.617	551.174
RGMC.12687	d__Bacteria	p__Bacteroidota	c__Bacteroidia	o__Bacteroidales	f__Bacteroidaceae	g__UBA4372	s__UBA4372 sp900318115	181.961	162.276	172.487	208.12	164.702	195.893	473.856	331.17	383.612	396.718	338.275	353.114
RGMC.14006	d__Bacteria	p__Bacteroidota	c__Bacteroidia	o__Bacteroidales	f__Bacteroidaceae	g__UBA4372	s__UBA4372 sp900318115	0	0	0	0	0	0	205.048	0	174.452	168.625	136.79	143.882
RGMC.16785	d__Bacteria	p__Bacteroidota	c__Bacteroidia	o__Bacteroidales	f__Bacteroidaceae	g__UBA4372	s__UBA4372 sp900318115	0	0	0	0	0	0	209.78	0	181.458	176.299	145.741	0
RGMC.14047	d__Bacteria	p__Bacteroidota	c__Bacteroidia	o__Bacteroidales	f__Bacteroidaceae	g__UBA4372	s__UBA4372 sp900318115	0	0	0	0	0	0	181.408	0	0	0	0	0
RGMC.28143	d__Bacteria	p__Bacteroidota	c__Bacteroidia	o__Bacteroidales	f__Bacteroidaceae	g__UBA4372	s__UBA4372 sp900318115	0	0	0	0	0	0	0	0	0	0	0	0
RGMC.10780	d__Bacteria	p__Bacteroidota	c__Bacteroidia	o__Bacteroidales	f__Bacteroidaceae	g__UBA4372	s__UBA4372 sp902768605	0	0	0	0	0	0	0	0	0	0	0	0
RGMC.19218	d__Bacteria	p__Bacteroidota	c__Bacteroidia	o__Bacteroidales	f__Bacteroidaceae	g__UBA4372	s__UBA4372 sp902776455	0	0	0	0	0	110.927	0	0	0	0	0	0
RGMC.21266	d__Bacteria	p__Bacteroidota	c__Bacteroidia	o__Bacteroidales	f__Bacteroidaceae	g__UBA4372	s__UBA4372 sp902776455	0	0	0	0	0	0	0	0	0	0	0	0
RGMC.22405	d__Bacteria	p__Bacteroidota	c__Bacteroidia	o__Bacteroidales	f__Bacteroidaceae	g__UBA4372	s__UBA4372 sp902776455	0	0	0	0	0	0	0	0	0	0	0	0
RGMC.19491	d__Bacteria	p__Bacteroidota	c__Bacteroidia	o__Bacteroidales	f__Bacteroidaceae	g__UBA4372	s__UBA4372 sp902779315	148.715	159.875	174.96	193.107	202.699	195.592	235.337	187.658	210.031	231.104	237.451	195.854
RGMC.25846	d__Bacteria	p__Bacteroidota	c__Bacteroidia	o__Bacteroidales	f__Bacteroidaceae	g__UBA4372	s__UBA4372 sp902779315	0	166.918	181.198	198.23	193.078	197.629	250.648	196.56	215.895	236.207	231.356	204.627
RGMC.19807	d__Bacteria	p__Bacteroidota	c__Bacteroidia	o__Bacteroidales	f__Bacteroidaceae	g__UBA4372	s__UBA4372 sp902779315	0	177.973	194.092	204.125	206.784	201.331	242.137	186.825	207.316	224.357	215.453	196.953
RGMC.19559	d__Bacteria	p__Bacteroidota	c__Bacteroidia	o__Bacteroidales	f__Bacteroidaceae	g__UBA4372	s__UBA4372 sp902779315	0	148.68	168.785	182.138	186.362	185.683	226.695	182.042	198.663	226.726	218.652	186.748
RGMC.23699	d__Bacteria	p__Bacteroidota	c__Bacteroidia	o__Bacteroidales	f__Bacteroidaceae	g__UBA4372	s__UBA4372 sp902779315	0	150.244	166.933	185.458	187.135	185.736	228.138	184.35	197.648	219.174	210.59	185.942
RGMC.2329	d__Bacteria	p__Bacteroidota	c__Bacteroidia	o__Bacteroidales	f__Bacteroidaceae	g__UBA4372	s__UBA4372 sp902779315	0	0	0	154.253	0	157.464	197.649	0	168.509	179.266	175.467	162.087
RGMC.12164	d__Bacteria	p__Bacteroidota	c__Bacteroidia	o__Bacteroidales	f__Bacteroidaceae	g__UBA4372	s__UBA4372 sp902779315	0	0	0	0	0	139.626	171.79	0	156.609	164.613	166.25	140.27
RGMC.12328	d__Bacteria	p__Bacteroidota	c__Bacteroidia	o__Bacteroidales	f__Bacteroidaceae	g__UBA4372	s__UBA4372 sp902779315	0	0	0	0	0	151.235	188.667	0	166.159	0	164.916	0
RGMC.1063	d__Bacteria	p__Bacteroidota	c__Bacteroidia	o__Bacteroidales	f__Bacteroidaceae	g__UBA6382	s__UBA6382 sp900318305	0	0	0	0	0	0	0	0	0	0	0	0
RGMC.12373	d__Bacteria	p__Bacteroidota	c__Bacteroidia	o__Bacteroidales	f__BM520	g__RGIG7150	s__RGIG7150 sp016285515	634.312	431.628	414.54	601.086	802.214	424.673	189.063	357.378	129.009	635.392	0	278.25
RGMC.47	d__Bacteria	p__Bacteroidota	c__Bacteroidia	o__Bacteroidales	f__BM520	g__RGIG7150	s__RGIG7150 sp016285515	473.476	317.449	312.435	453.396	622.724	302.028	143.643	249.092	0	421.915	0	212.204
RGMC.10915	d__Bacteria	p__Bacteroidota	c__Bacteroidia	o__Bacteroidales	f__BM520	g__RGIG7150	s__RGIG7150 sp016285515	474.053	306.138	303.67	402.909	512.546	303.685	153.755	260.062	0	419.79	0	204.587
RGMC.39612	d__Bacteria	p__Bacteroidota	c__Bacteroidia	o__Bacteroidales	f__BM520	g__RGIG7150	s__RGIG7150 sp016285515	362.413	247.142	238.643	357.988	476.152	246.702	0	224.38	0	382.209	0	165.305
RGMC.40406	d__Bacteria	p__Bacteroidota	c__Bacteroidia	o__Bacteroidales	f__BM520	g__RGIG7150	s__RGIG7150 sp016285515	254.793	130.353	145.246	169.841	201.176	156.367	0	122.488	0	182.689	0	113.045
RGMC.39682	d__Bacteria	p__Bacteroidota	c__Bacteroidia	o__Bacteroidales	f__BM520	g__RGIG7150	s__RGIG7150 sp016285515	203.672	131.731	125.11	177.668	221.353	142.13	0	126.711	0	200.359	0	105.261
RGMC.27339	d__Bacteria	p__Bacteroidota	c__Bacteroidia	o__Bacteroidales	f__BM520	g__RGIG7150	s__RGIG7150 sp016285515	300.214	0	0	230.56	291.976	188.113	0	0	0	240.977	0	0
RGMC.27333	d__Bacteria	p__Bacteroidota	c__Bacteroidia	o__Bacteroidales	f__BM520	g__RGIG7150	s__RGIG7150 sp016285515	252.058	0	0	0	257.024	0	0	0	0	0	0	0
RGMC.15850	d__Bacteria	p__Bacteroidota	c__Bacteroidia	o__Bacteroidales	f__BM520	g__RGIG7150	s__RGIG7150 sp017538085	957.79	619.351	608.94	881.3	1135.71	626.117	320.003	546.758	222.787	948.897	277.105	441.079
RGMC.16227	d__Bacteria	p__Bacteroidota	c__Bacteroidia	o__Bacteroidales	f__BM520	g__RGIG7150	s__RGIG7150 sp017538085	744.41	450.758	468.904	634.523	816.016	499.541	279.195	426.934	185.425	689.217	225.556	328.837
RGMC.15885	d__Bacteria	p__Bacteroidota	c__Bacteroidia	o__Bacteroidales	f__BM520	g__RGIG7150	s__RGIG7150 sp017538085	715.276	439.451	473.225	585.012	743.835	472.514	243.498	379.372	158.9	605.755	180.054	321.402
RGMC.27020	d__Bacteria	p__Bacteroidota	c__Bacteroidia	o__Bacteroidales	f__F082	g__Limimorpha	s__	5957.02	5317.34	5469.79	6235.17	7241.49	5624.5	2536.38	3296.29	1644.88	4136.13	1633.42	3303.93
RGMC.25544	d__Bacteria	p__Bacteroidota	c__Bacteroidia	o__Bacteroidales	f__F082	g__Limimorpha	s__	5715.57	4896.02	5430.32	5475.41	5653.96	4945.97	1789.23	3269.52	1200.11	2825.85	934.715	2312.51
RGMC.39652	d__Bacteria	p__Bacteroidota	c__Bacteroidia	o__Bacteroidales	f__F082	g__Limimorpha	s__	1891.64	1168.72	1291.93	1820.73	2236.15	1644.38	1434.62	1829.42	767.199	2831.02	690.852	1451.43
RGMC.25474	d__Bacteria	p__Bacteroidota	c__Bacteroidia	o__Bacteroidales	f__F082	g__Limimorpha	s__	1008.86	853.308	918.974	965.401	1014.57	839.332	347.97	585.52	221.631	541.452	0	442.413
RGMC.40796	d__Bacteria	p__Bacteroidota	c__Bacteroidia	o__Bacteroidales	f__F082	g__Limimorpha	s__	0	0	0	987.782	0	0	0	0	0	0	0	0
RGMC.37518	d__Bacteria	p__Bacteroidota	c__Bacteroidia	o__Bacteroidales	f__F082	g__Limimorpha	s__Limimorpha sp001603665	707.667	459.419	442.706	672.566	894.542	569.969	0	251.704	0	289.882	0	0
RGMC.25540	d__Bacteria	p__Bacteroidota	c__Bacteroidia	o__Bacteroidales	f__F082	g__Limimorpha	s__Limimorpha sp001603665	514.6	338.187	322.158	481.165	639.083	415.021	0	165.051	0	162.286	0	0
RGMC.20356	d__Bacteria	p__Bacteroidota	c__Bacteroidia	o__Bacteroidales	f__F082	g__Limimorpha	s__Limimorpha sp900315175	0	0	0	0	0	0	0	0	205.692	256.791	307.16	0
RGMC.37647	d__Bacteria	p__Bacteroidota	c__Bacteroidia	o__Bacteroidales	f__F082	g__Limimorpha	s__Limimorpha sp900315175	0	0	0	0	0	0	0	0	0	237.38	293.284	0
RGMC.2146	d__Bacteria	p__Bacteroidota	c__Bacteroidia	o__Bacteroidales	f__F082	g__Limimorpha	s__Limimorpha sp900315175	0	0	0	0	0	0	0	0	201.262	0	287.332	0
RGMC.18779	d__Bacteria	p__Bacteroidota	c__Bacteroidia	o__Bacteroidales	f__F082	g__Limimorpha	s__Limimorpha sp902771635	512.414	351.051	362.483	426.845	438.556	382.324	0	0	0	0	0	0
RGMC.10839	d__Bacteria	p__Bacteroidota	c__Bacteroidia	o__Bacteroidales	f__F082	g__Limimorpha	s__Limimorpha sp902774295	1098.82	521.935	684.458	1325.14	1461.38	1030.69	3937.39	2529.85	4325.76	5384.36	6110.7	2736.64
RGMC.23894	d__Bacteria	p__Bacteroidota	c__Bacteroidia	o__Bacteroidales	f__F082	g__Limimorpha	s__Limimorpha sp902774295	198.703	0	0	371.671	546.144	199.82	604.313	412.796	683.732	1001.45	1153.6	627.372
RGMC.23969	d__Bacteria	p__Bacteroidota	c__Bacteroidia	o__Bacteroidales	f__F082	g__Limimorpha	s__Limimorpha sp902774295	329.366	0	0	294.01	297.68	257.845	915.014	550.71	857.659	927.93	1005.33	585.739
RGMC.21746	d__Bacteria	p__Bacteroidota	c__Bacteroidia	o__Bacteroidales	f__F082	g__Limimorpha	s__Limimorpha sp902774295	171.649	0	0	201.345	217.016	158.33	560.956	353.11	636.449	715.458	868.155	373.327
RGMC.23698	d__Bacteria	p__Bacteroidota	c__Bacteroidia	o__Bacteroidales	f__F082	g__Limimorpha	s__Limimorpha sp902774295	167.267	0	0	193.059	211.337	151.883	561.472	345.243	624.417	693.285	878.895	375.509
RGMC.38500	d__Bacteria	p__Bacteroidota	c__Bacteroidia	o__Bacteroidales	f__F082	g__Limimorpha	s__Limimorpha sp902774295	200.4	0	0	235.411	286.892	169.885	538.423	325.883	582.82	683.202	812.308	381.784
RGMC.38463	d__Bacteria	p__Bacteroidota	c__Bacteroidia	o__Bacteroidales	f__F082	g__Limimorpha	s__Limimorpha sp902774295	0	0	0	216.96	215.005	188.826	578.386	364.051	613.636	667.289	788.882	390.448
RGMC.19018	d__Bacteria	p__Bacteroidota	c__Bacteroidia	o__Bacteroidales	f__F082	g__Limimorpha	s__Limimorpha sp902774295	160.909	0	0	185.962	207.092	151.623	527.977	325.91	587.562	653.588	825.004	343.578
RGMC.1434	d__Bacteria	p__Bacteroidota	c__Bacteroidia	o__Bacteroidales	f__F082	g__Limimorpha	s__Limimorpha sp902774295	217.126	0	0	208.661	199.538	187.976	519.689	319.151	546.391	580.529	695.197	333.536
RGMC.40351	d__Bacteria	p__Bacteroidota	c__Bacteroidia	o__Bacteroidales	f__F082	g__Limimorpha	s__Limimorpha sp902774295	0	0	0	180.623	182.432	147.962	512.69	312.816	522.06	602.699	677.531	322.622
RGMC.38524	d__Bacteria	p__Bacteroidota	c__Bacteroidia	o__Bacteroidales	f__F082	g__Limimorpha	s__Limimorpha sp902774295	0	0	0	0	0	0	509.185	335.949	525.987	613.378	674.014	362.553
RGMC.23640	d__Bacteria	p__Bacteroidota	c__Bacteroidia	o__Bacteroidales	f__F082	g__Limimorpha	s__Limimorpha sp902774295	0	0	0	0	0	0	477.104	305.663	517.146	582.167	696.962	308.631
RGMC.19024	d__Bacteria	p__Bacteroidota	c__Bacteroidia	o__Bacteroidales	f__F082	g__Limimorpha	s__Limimorpha sp902774365	767.199	432.409	452.63	505.242	487.499	444.634	0	421.35	0	425.256	0	325.608
RGMC.28906	d__Bacteria	p__Bacteroidota	c__Bacteroidia	o__Bacteroidales	f__F082	g__Limimorpha	s__Limimorpha sp902789915	0	0	0	0	0	0	192.469	0	145.778	242.575	133.398	209.272
RGMC.15252	d__Bacteria	p__Bacteroidota	c__Bacteroidia	o__Bacteroidales	f__F082	g__Limimorpha	s__Limimorpha sp902789915	0	0	0	0	0	0	0	0	0	0	0	0
RGMC.25779	d__Bacteria	p__Bacteroidota	c__Bacteroidia	o__Bacteroidales	f__F082	g__Limimorpha	s__Limimorpha sp902789915	0	0	0	0	0	0	0	0	0	0	0	0
RGMC.20496	d__Bacteria	p__Bacteroidota	c__Bacteroidia	o__Bacteroidales	f__F082	g__Limimorpha	s__Limimorpha sp902789915	0	0	0	0	0	0	0	0	0	0	0	0
RGMC.21357	d__Bacteria	p__Bacteroidota	c__Bacteroidia	o__Bacteroidales	f__F082	g__Limimorpha	s__Limimorpha sp902799345	0	0	0	0	0	274.066	0	0	0	0	0	0
RGMC.39174	d__Bacteria	p__Bacteroidota	c__Bacteroidia	o__Bacteroidales	f__F082	g__Limimorpha	s__Limimorpha sp902801465	0	0	0	0	0	0	228.216	0	166.948	223.093	0	198.043
RGMC.29574	d__Bacteria	p__Bacteroidota	c__Bacteroidia	o__Bacteroidales	f__F082	g__Limimorpha	s__Limimorpha sp902801465	0	0	0	0	0	0	178.309	0	125.75	159.654	0	144.866
RGMC.9556	d__Bacteria	p__Bacteroidota	c__Bacteroidia	o__Bacteroidales	f__F082	g__Limimorpha	s__Limimorpha sp902801465	0	0	0	0	0	0	185.792	0	129.345	175.915	0	163.482
RGMC.10848	d__Bacteria	p__Bacteroidota	c__Bacteroidia	o__Bacteroidales	f__F082	g__Limimorpha	s__Limimorpha sp902801465	0	0	0	0	0	0	184.384	0	127.374	174.159	0	160.432
RGMC.15156	d__Bacteria	p__Bacteroidota	c__Bacteroidia	o__Bacteroidales	f__F082	g__Limimorpha	s__Limimorpha sp902801465	0	0	0	0	0	0	214.205	0	0	0	0	177.684
RGMC.28968	d__Bacteria	p__Bacteroidota	c__Bacteroidia	o__Bacteroidales	f__F082	g__Limimorpha	s__Limimorpha sp905233685	4781.43	2529.25	2597.28	3192.64	3465.18	2791.98	0	1412.51	0	657.495	0	240.503
RGMC.18522	d__Bacteria	p__Bacteroidota	c__Bacteroidia	o__Bacteroidales	f__F082	g__Limimorpha	s__Limimorpha sp905233685	3090.42	1727.92	1764.05	2217.39	2312.48	1977.47	0	995.104	0	476.699	0	168.086
RGMC.17429	d__Bacteria	p__Bacteroidota	c__Bacteroidia	o__Bacteroidales	f__ML635J-15	g__Bact-19	s__	1012.59	981.687	1141.47	1598.67	1714.11	1562.58	0	0	0	0	0	0
RGMC.26932	d__Bacteria	p__Bacteroidota	c__Bacteroidia	o__Bacteroidales	f__ML635J-15	g__Bact-19	s__	0	355.255	405.029	574.632	615.331	550.945	0	0	0	0	0	0
RGMC.27181	d__Bacteria	p__Bacteroidota	c__Bacteroidia	o__Bacteroidales	f__ML635J-15	g__Bact-19	s__	0	0	0	591.398	607.804	588.027	0	0	0	0	0	0
RGMC.38072	d__Bacteria	p__Bacteroidota	c__Bacteroidia	o__Bacteroidales	f__ML635J-15	g__Bact-19	s__	0	0	0	481.478	544.225	427.251	0	0	0	0	0	0
RGMC.29979	d__Bacteria	p__Bacteroidota	c__Bacteroidia	o__Bacteroidales	f__ML635J-15	g__Bact-19	s__Bact-19 sp902791865	0	300.677	340.363	480.09	531.436	449.442	0	0	0	0	0	0
RGMC.23807	d__Bacteria	p__Bacteroidota	c__Bacteroidia	o__Bacteroidales	f__ML635J-15	g__Bact-19	s__Bact-19 sp902791865	0	347.024	0	534.438	559.402	530.587	0	0	0	0	0	0
RGMC.1681	d__Bacteria	p__Bacteroidota	c__Bacteroidia	o__Bacteroidales	f__ML635J-15	g__Bact-19	s__Bact-19 sp902791865	0	260.959	275.688	424.281	491.909	381.098	0	0	0	0	0	0
RGMC.20684	d__Bacteria	p__Bacteroidota	c__Bacteroidia	o__Bacteroidales	f__ML635J-15	g__Bact-19	s__Bact-19 sp902791865	0	252.74	271.432	424.176	495.271	375.736	0	0	0	0	0	0
RGMC.40273	d__Bacteria	p__Bacteroidota	c__Bacteroidia	o__Bacteroidales	f__ML635J-15	g__Bact-19	s__Bact-19 sp902791865	0	0	0	442.528	513.597	394.464	0	0	0	0	0	0
RGMC.39328	d__Bacteria	p__Bacteroidota	c__Bacteroidia	o__Bacteroidales	f__ML635J-15	g__Bact-19	s__Bact-19 sp902791865	0	0	0	362.625	410.073	326.716	0	0	0	0	0	0
RGMC.18602	d__Bacteria	p__Bacteroidota	c__Bacteroidia	o__Bacteroidales	f__ML635J-15	g__Bact-19	s__Bact-19 sp905234755	535.444	545.795	600.265	871.895	979.849	815.792	0	0	0	0	0	0
RGMC.12638	d__Bacteria	p__Bacteroidota	c__Bacteroidia	o__Bacteroidales	f__Muribaculaceae	g__RUG14106	s__RUG14106 sp017552595	229.247	149.389	216.119	234.813	233.782	214.186	355.198	281.839	210.553	299.319	264.402	253.382
RGMC.29333	d__Bacteria	p__Bacteroidota	c__Bacteroidia	o__Bacteroidales	f__Muribaculaceae	g__RUG14106	s__RUG14106 sp017552595	164.862	109.305	158.89	181.364	179.791	154.345	262.396	214.204	152.865	234.088	200.798	183.115
RGMC.1769	d__Bacteria	p__Bacteroidota	c__Bacteroidia	o__Bacteroidales	f__Muribaculaceae	g__RUG14106	s__RUG14106 sp017552595	173.272	106.995	155.651	172.383	178.162	156.381	244.092	194.71	138.377	217.032	178.347	175.393
RGMC.17464	d__Bacteria	p__Bacteroidota	c__Bacteroidia	o__Bacteroidales	f__Muribaculaceae	g__RUG14106	s__RUG14106 sp017552595	0	0	0	121.048	129.42	99.2488	163.863	138.773	99.6954	154.562	137.611	123.289
RGMC.16131	d__Bacteria	p__Bacteroidota	c__Bacteroidia	o__Bacteroidales	f__Muribaculaceae	g__RUG14106	s__RUG14106 sp017552595	0	0	0	0	0	0	255.346	0	0	0	197.348	205.578
RGMC.27411	d__Bacteria	p__Bacteroidota	c__Bacteroidia	o__Bacteroidales	f__Muribaculaceae	g__Sodaliphilus	s__	0	0	0	0	0	0	0	0	0	0	0	0
RGMC.12926	d__Bacteria	p__Bacteroidota	c__Bacteroidia	o__Bacteroidales	f__Muribaculaceae	g__Sodaliphilus	s__Sodaliphilus sp017443765	274.5	373.528	355.087	378.547	407.954	316.013	382.667	345.125	389.162	307.408	343.772	330.356
RGMC.16182	d__Bacteria	p__Bacteroidota	c__Bacteroidia	o__Bacteroidales	f__Muribaculaceae	g__Sodaliphilus	s__Sodaliphilus sp017619935	0	0	0	0	0	134.938	293.544	211.952	314.707	212.875	283.475	243.153
RGMC.27063	d__Bacteria	p__Bacteroidota	c__Bacteroidia	o__Bacteroidales	f__Muribaculaceae	g__Sodaliphilus	s__Sodaliphilus sp902793405	503.975	395.621	414.711	353.945	330.705	364.634	608.494	413.063	557.955	426.249	515.11	535.376
RGMC.19769	d__Bacteria	p__Bacteroidota	c__Bacteroidia	o__Bacteroidales	f__Muribaculaceae	g__Sodaliphilus	s__Sodaliphilus sp902793405	0	0	0	0	0	0	325.174	0	311.585	0	283.811	302.854
RGMC.20831	d__Bacteria	p__Bacteroidota	c__Bacteroidia	o__Bacteroidales	f__Muribaculaceae	g__Sodaliphilus	s__Sodaliphilus sp902793405	0	0	0	0	0	0	0	0	0	0	0	0
RGMC.22020	d__Bacteria	p__Bacteroidota	c__Bacteroidia	o__Bacteroidales	f__P3	g__UBA1217	s__UBA1217 sp902788805	0	0	0	0	0	0	0	0	313.539	0	251.612	0
RGMC.40753	d__Bacteria	p__Bacteroidota	c__Bacteroidia	o__Bacteroidales	f__P3	g__UBA1217	s__UBA1217 sp902788805	0	0	0	0	0	0	0	0	294.037	0	225.794	0
RGMC.468	d__Bacteria	p__Bacteroidota	c__Bacteroidia	o__Bacteroidales	f__P3	g__UBA1217	s__UBA1217 sp902788805	0	0	0	0	0	0	0	0	284.254	0	198.291	0
RGMC.37659	d__Bacteria	p__Bacteroidota	c__Bacteroidia	o__Bacteroidales	f__P3	g__UBA1217	s__UBA1217 sp902788805	0	0	0	0	0	0	0	0	231.131	0	159.99	0
RGMC.20729	d__Bacteria	p__Bacteroidota	c__Bacteroidia	o__Bacteroidales	f__P3	g__UBA1217	s__UBA1217 sp902788805	0	0	0	0	0	0	0	0	219.211	0	174.583	0
RGMC.38743	d__Bacteria	p__Bacteroidota	c__Bacteroidia	o__Bacteroidales	f__P3	g__UBA1217	s__UBA1217 sp902788805	0	0	0	0	0	0	0	0	240.493	0	173.701	0
RGMC.19343	d__Bacteria	p__Bacteroidota	c__Bacteroidia	o__Bacteroidales	f__P3	g__UBA1217	s__UBA1217 sp902788805	0	0	0	0	0	0	0	0	237.705	0	183.522	0
RGMC.21316	d__Bacteria	p__Bacteroidota	c__Bacteroidia	o__Bacteroidales	f__P3	g__UBA1217	s__UBA1217 sp902788805	0	0	0	0	0	0	0	0	213.858	0	160.871	0
RGMC.20679	d__Bacteria	p__Bacteroidota	c__Bacteroidia	o__Bacteroidales	f__P3	g__UBA1217	s__UBA1217 sp902788805	0	0	0	0	0	0	0	0	190.686	0	145.749	0
RGMC.19422	d__Bacteria	p__Bacteroidota	c__Bacteroidia	o__Bacteroidales	f__P3	g__UBA1217	s__UBA1217 sp902788805	0	0	0	0	0	0	0	0	219.965	0	161.724	0
RGMC.20850	d__Bacteria	p__Bacteroidota	c__Bacteroidia	o__Bacteroidales	f__P3	g__UBA1217	s__UBA1217 sp902788805	0	0	0	0	0	0	0	0	208.992	0	159.524	0
RGMC.20306	d__Bacteria	p__Bacteroidota	c__Bacteroidia	o__Bacteroidales	f__P3	g__UBA1217	s__UBA1217 sp902788805	0	0	0	0	0	0	0	0	212.034	0	168.3	0
RGMC.19096	d__Bacteria	p__Bacteroidota	c__Bacteroidia	o__Bacteroidales	f__P3	g__UBA1217	s__UBA1217 sp902788805	0	0	0	0	0	0	0	0	203.316	0	158.984	0
RGMC.21541	d__Bacteria	p__Bacteroidota	c__Bacteroidia	o__Bacteroidales	f__P3	g__UBA1217	s__UBA1217 sp902788805	0	0	0	0	0	0	0	0	201.868	0	151.254	0
RGMC.15529	d__Bacteria	p__Bacteroidota	c__Bacteroidia	o__Bacteroidales	f__P3	g__UBA1217	s__UBA1217 sp902788805	0	0	0	0	0	0	0	0	200.078	0	182.182	0
RGMC.20397	d__Bacteria	p__Bacteroidota	c__Bacteroidia	o__Bacteroidales	f__P3	g__UBA1217	s__UBA1217 sp902788805	0	0	0	0	0	0	0	0	195.844	0	154.217	0
RGMC.19016	d__Bacteria	p__Bacteroidota	c__Bacteroidia	o__Bacteroidales	f__P3	g__UBA1217	s__UBA1217 sp902788805	0	0	0	0	0	0	0	0	191.515	0	144.71	0
RGMC.21587	d__Bacteria	p__Bacteroidota	c__Bacteroidia	o__Bacteroidales	f__P3	g__UBA1217	s__UBA1217 sp902788805	0	0	0	0	0	0	0	0	188.194	0	141.37	0
RGMC.15329	d__Bacteria	p__Bacteroidota	c__Bacteroidia	o__Bacteroidales	f__P3	g__UBA1217	s__UBA1217 sp902788805	0	0	0	0	0	0	0	0	227.617	0	0	0
RGMC.19640	d__Bacteria	p__Bacteroidota	c__Bacteroidia	o__Bacteroidales	f__P3	g__UBA1217	s__UBA1217 sp902788805	0	0	0	0	0	0	0	0	185.201	0	148.328	0
RGMC.19740	d__Bacteria	p__Bacteroidota	c__Bacteroidia	o__Bacteroidales	f__P3	g__UBA1217	s__UBA1217 sp902788805	0	0	0	0	0	0	0	0	188.922	0	143.827	0
RGMC.15426	d__Bacteria	p__Bacteroidota	c__Bacteroidia	o__Bacteroidales	f__P3	g__UBA1217	s__UBA1217 sp902788805	0	0	0	0	0	0	0	0	179.294	0	142.887	0
RGMC.21280	d__Bacteria	p__Bacteroidota	c__Bacteroidia	o__Bacteroidales	f__P3	g__UBA1217	s__UBA1217 sp902788805	0	0	0	0	0	0	0	0	185.908	0	134.814	0
RGMC.21300	d__Bacteria	p__Bacteroidota	c__Bacteroidia	o__Bacteroidales	f__P3	g__UBA1217	s__UBA1217 sp902788805	0	0	0	0	0	0	0	0	182.088	0	168.666	0
RGMC.20363	d__Bacteria	p__Bacteroidota	c__Bacteroidia	o__Bacteroidales	f__P3	g__UBA1217	s__UBA1217 sp902788805	0	0	0	0	0	0	0	0	180.783	0	142.931	0
RGMC.19144	d__Bacteria	p__Bacteroidota	c__Bacteroidia	o__Bacteroidales	f__P3	g__UBA1217	s__UBA1217 sp902788805	0	0	0	0	0	0	0	0	181.762	0	140.777	0
RGMC.20950	d__Bacteria	p__Bacteroidota	c__Bacteroidia	o__Bacteroidales	f__P3	g__UBA1217	s__UBA1217 sp902788805	0	0	0	0	0	0	0	0	166.347	0	144.941	0
RGMC.21488	d__Bacteria	p__Bacteroidota	c__Bacteroidia	o__Bacteroidales	f__P3	g__UBA1217	s__UBA1217 sp902788805	0	0	0	0	0	0	0	0	170.466	0	134.827	0
RGMC.39253	d__Bacteria	p__Bacteroidota	c__Bacteroidia	o__Bacteroidales	f__P3	g__UBA1217	s__UBA1217 sp902788805	0	0	0	0	0	0	0	0	0	0	0	0
RGMC.10795	d__Bacteria	p__Bacteroidota	c__Bacteroidia	o__Bacteroidales	f__P3	g__UBA1217	s__UBA1217 sp902788805	0	0	0	0	0	0	0	0	0	0	0	0
RGMC.27186	d__Bacteria	p__Bacteroidota	c__Bacteroidia	o__Bacteroidales	f__P3	g__UBA1217	s__UBA1217 sp946401725	0	0	0	470.779	0	455.089	0	832.947	0	696.089	0	0
RGMC.12388	d__Bacteria	p__Bacteroidota	c__Bacteroidia	o__Bacteroidales	f__P3	g__UBA1711	s__UBA1711 sp017545365	276.322	0	213.004	0	0	207.531	0	0	0	0	0	0
RGMC.40245	d__Bacteria	p__Bacteroidota	c__Bacteroidia	o__Bacteroidales	f__P3	g__UBA1711	s__UBA1711 sp900317125	0	0	0	0	0	0	0	0	0	0	0	0
RGMC.29540	d__Bacteria	p__Bacteroidota	c__Bacteroidia	o__Bacteroidales	f__P3	g__UBA1711	s__UBA1711 sp900317125	0	0	0	0	0	0	0	0	0	0	0	0
RGMC.12327	d__Bacteria	p__Bacteroidota	c__Bacteroidia	o__Bacteroidales	f__P3	g__UBA1711	s__UBA1711 sp900317125	0	0	0	0	0	0	0	0	0	0	0	0
RGMC.21503	d__Bacteria	p__Bacteroidota	c__Bacteroidia	o__Bacteroidales	f__P3	g__UBA1711	s__UBA1711 sp902790215	0	0	0	0	0	0	0	0	324.713	0	322.158	0
RGMC.20672	d__Bacteria	p__Bacteroidota	c__Bacteroidia	o__Bacteroidales	f__P3	g__UBA1711	s__UBA1711 sp902790215	0	0	0	0	0	0	0	0	292.521	0	295.618	0
RGMC.18636	d__Bacteria	p__Bacteroidota	c__Bacteroidia	o__Bacteroidales	f__P3	g__UBA1711	s__UBA1711 sp902790215	0	0	0	0	0	0	0	0	291.109	0	298.662	0
RGMC.20294	d__Bacteria	p__Bacteroidota	c__Bacteroidia	o__Bacteroidales	f__P3	g__UBA1711	s__UBA1711 sp902790215	0	0	0	0	0	0	0	0	275.46	0	303.889	0
RGMC.21288	d__Bacteria	p__Bacteroidota	c__Bacteroidia	o__Bacteroidales	f__P3	g__UBA1711	s__UBA1711 sp902790215	0	0	0	0	0	0	0	0	244.967	0	243.264	0
RGMC.19805	d__Bacteria	p__Bacteroidota	c__Bacteroidia	o__Bacteroidales	f__P3	g__UBA1711	s__UBA1711 sp902790215	0	0	0	0	0	0	0	0	220.969	0	235.302	0
RGMC.20530	d__Bacteria	p__Bacteroidota	c__Bacteroidia	o__Bacteroidales	f__P3	g__UBA1711	s__UBA1711 sp902790215	0	0	0	0	0	0	0	0	209.987	0	235.359	0
RGMC.21694	d__Bacteria	p__Bacteroidota	c__Bacteroidia	o__Bacteroidales	f__P3	g__UBA1711	s__UBA1711 sp902803395	307.218	0	0	180.072	140.967	195.549	0	152.596	0	144.665	0	139.159
RGMC.713	d__Bacteria	p__Bacteroidota	c__Bacteroidia	o__Bacteroidales	f__P3	g__UBA1711	s__UBA1711 sp902803395	244.359	0	0	157.332	132.778	147.243	0	139.078	0	129.946	0	115.055
RGMC.18595	d__Bacteria	p__Bacteroidota	c__Bacteroidia	o__Bacteroidales	f__P3	g__UBA1711	s__UBA1711 sp905234695	0	197.167	220.462	320.493	283.246	327.708	0	0	0	0	0	0
RGMC.27098	d__Bacteria	p__Bacteroidota	c__Bacteroidia	o__Bacteroidales	f__P3	g__UBA1711	s__UBA1711 sp905234695	0	187.063	211.45	306.431	285.138	311.453	0	0	0	0	0	0
RGMC.39216	d__Bacteria	p__Bacteroidota	c__Bacteroidia	o__Bacteroidales	f__P3	g__UBA1711	s__UBA1711 sp946406015	740.794	502.169	536.395	594.271	573.274	556.767	904.673	1203.14	0	1582.4	0	1353.8
RGMC.9634	d__Bacteria	p__Bacteroidota	c__Bacteroidia	o__Bacteroidales	f__P3	g__UBA1711	s__UBA1711 sp946406015	508.796	357.17	371.49	415.788	366.639	400.546	692.89	885.645	0	1155.55	0	1029.87
RGMC.40811	d__Bacteria	p__Bacteroidota	c__Bacteroidia	o__Bacteroidales	f__Paludibacteraceae	g__RF16	s__	0	0	0	123.832	0	109.135	434.964	271.207	417.404	455.57	374.517	396.678
RGMC.39128	d__Bacteria	p__Bacteroidota	c__Bacteroidia	o__Bacteroidales	f__Paludibacteraceae	g__RF16	s__	0	0	0	152.334	126.069	118.306	343.896	230.109	358.5	403.641	365.873	292.856
RGMC.39385	d__Bacteria	p__Bacteroidota	c__Bacteroidia	o__Bacteroidales	f__Paludibacteraceae	g__RF16	s__	0	0	0	105.243	0	80.3494	303.327	202.059	312.696	353.791	332.653	240.888
RGMC.29363	d__Bacteria	p__Bacteroidota	c__Bacteroidia	o__Bacteroidales	f__Paludibacteraceae	g__RF16	s__	0	0	0	0	0	0	168.75	0	164.802	180.395	163.291	0
RGMC.17448	d__Bacteria	p__Bacteroidota	c__Bacteroidia	o__Bacteroidales	f__Paludibacteraceae	g__RF16	s__RF16 sp002310195	1156.32	1052.46	1256.84	1432.72	1617.56	1445.79	2829.5	2162.86	2623.58	2782.43	2813.96	2392.36
RGMC.18708	d__Bacteria	p__Bacteroidota	c__Bacteroidia	o__Bacteroidales	f__Paludibacteraceae	g__RF16	s__RF16 sp002310195	684.971	711.08	744.68	1027.44	1289.21	942.3	1383.08	1264.89	1403.22	1887.35	1984.36	1274.94
RGMC.16379	d__Bacteria	p__Bacteroidota	c__Bacteroidia	o__Bacteroidales	f__Paludibacteraceae	g__RF16	s__RF16 sp002310195	526.485	541.138	565.424	792.281	976.603	701.196	1159.23	964.66	1112.84	1389.89	1467.27	966.124
RGMC.17245	d__Bacteria	p__Bacteroidota	c__Bacteroidia	o__Bacteroidales	f__Paludibacteraceae	g__RF16	s__RF16 sp017394705	0	0	0	135.686	119.249	111.556	259.638	162.888	258.105	267.982	301.086	218.356
RGMC.39094	d__Bacteria	p__Bacteroidota	c__Bacteroidia	o__Bacteroidales	f__Paludibacteraceae	g__RF16	s__RF16 sp017394705	0	0	0	118.235	111.237	112.659	232.699	152.227	230.049	236.24	232.58	171.871
RGMC.1987	d__Bacteria	p__Bacteroidota	c__Bacteroidia	o__Bacteroidales	f__Paludibacteraceae	g__RF16	s__RF16 sp017394705	0	0	0	0	0	0	184.789	0	194.839	196.254	205.179	143.697
RGMC.39654	d__Bacteria	p__Bacteroidota	c__Bacteroidia	o__Bacteroidales	f__Paludibacteraceae	g__RF16	s__RF16 sp017450605	238.275	127.454	0	189.287	0	205.584	178.148	195.176	181.46	248.708	150.454	196.359
RGMC.12818	d__Bacteria	p__Bacteroidota	c__Bacteroidia	o__Bacteroidales	f__Paludibacteraceae	g__RF16	s__RF16 sp017450605	168.962	0	0	144.057	0	147.081	0	144.191	130.224	180.726	108.301	139.935
RGMC.28623	d__Bacteria	p__Bacteroidota	c__Bacteroidia	o__Bacteroidales	f__Paludibacteraceae	g__RF16	s__RF16 sp900321775	0	0	0	0	0	0	456.343	276.465	485.832	413.937	402.235	315.807
RGMC.12857	d__Bacteria	p__Bacteroidota	c__Bacteroidia	o__Bacteroidales	f__Paludibacteraceae	g__RF16	s__RF16 sp900321775	0	0	0	0	0	0	388.76	261.521	439.524	444.442	445.731	279.013
RGMC.28917	d__Bacteria	p__Bacteroidota	c__Bacteroidia	o__Bacteroidales	f__Paludibacteraceae	g__RF16	s__RF16 sp900321775	0	0	0	0	0	0	355.001	231.971	373.028	355.645	327.02	243.097
RGMC.17734	d__Bacteria	p__Bacteroidota	c__Bacteroidia	o__Bacteroidales	f__Paludibacteraceae	g__RF16	s__RF16 sp900321775	0	0	0	0	0	0	331.523	221.326	373.817	361.818	340.978	232.341
RGMC.15539	d__Bacteria	p__Bacteroidota	c__Bacteroidia	o__Bacteroidales	f__Paludibacteraceae	g__RF16	s__RF16 sp900321775	0	0	0	0	0	0	329.545	204.984	347.528	314.697	281.628	246.682
RGMC.15415	d__Bacteria	p__Bacteroidota	c__Bacteroidia	o__Bacteroidales	f__Paludibacteraceae	g__RF16	s__RF16 sp900321775	0	0	0	0	0	0	313.332	202.988	332.462	314.653	279.591	230.697
RGMC.2112	d__Bacteria	p__Bacteroidota	c__Bacteroidia	o__Bacteroidales	f__Paludibacteraceae	g__RF16	s__RF16 sp900321775	0	0	0	0	0	0	323.611	0	320.28	287.138	252.409	226.827
RGMC.22361	d__Bacteria	p__Bacteroidota	c__Bacteroidia	o__Bacteroidales	f__Paludibacteraceae	g__RF16	s__RF16 sp900321775	0	0	0	0	0	0	247.625	0	268.867	268.969	246.401	178.693
RGMC.22408	d__Bacteria	p__Bacteroidota	c__Bacteroidia	o__Bacteroidales	f__Paludibacteraceae	g__RF16	s__RF16 sp900321775	0	0	0	0	0	0	248.981	0	274.935	253.614	220.655	178.458
RGMC.4233	d__Bacteria	p__Bacteroidota	c__Bacteroidia	o__Bacteroidales	f__Paludibacteraceae	g__RF16	s__RF16 sp900321775	0	0	0	0	0	0	0	0	279.055	241.528	217.349	0
RGMC.20244	d__Bacteria	p__Bacteroidota	c__Bacteroidia	o__Bacteroidales	f__Paludibacteraceae	g__RF16	s__RF16 sp900321775	0	0	0	0	0	0	236.73	0	257.202	232.48	224.226	0
RGMC.20017	d__Bacteria	p__Bacteroidota	c__Bacteroidia	o__Bacteroidales	f__Paludibacteraceae	g__RF16	s__RF16 sp900321775	0	0	0	0	0	0	0	0	239.738	0	208.993	0
RGMC.19988	d__Bacteria	p__Bacteroidota	c__Bacteroidia	o__Bacteroidales	f__Paludibacteraceae	g__RF16	s__RF16 sp900321775	0	0	0	0	0	0	0	0	219.226	0	0	0
RGMC.20781	d__Bacteria	p__Bacteroidota	c__Bacteroidia	o__Bacteroidales	f__Paludibacteraceae	g__RF16	s__RF16 sp900321775	0	0	0	0	0	0	0	0	180.167	0	154.118	0
RGMC.17409	d__Bacteria	p__Bacteroidota	c__Bacteroidia	o__Bacteroidales	f__Paludibacteraceae	g__RF16	s__RF16 sp900321775	0	0	0	0	0	0	0	0	0	0	0	0
RGMC.22407	d__Bacteria	p__Bacteroidota	c__Bacteroidia	o__Bacteroidales	f__Paludibacteraceae	g__RF16	s__RF16 sp902769535	0	0	0	0	0	0	140.589	0	157.189	136.66	184.502	0
RGMC.40599	d__Bacteria	p__Bacteroidota	c__Bacteroidia	o__Bacteroidales	f__Paludibacteraceae	g__RF16	s__RF16 sp902769535	0	0	0	0	0	0	0	0	149.544	0	184.092	0
RGMC.38763	d__Bacteria	p__Bacteroidota	c__Bacteroidia	o__Bacteroidales	f__Paludibacteraceae	g__RF16	s__RF16 sp902769535	0	0	0	0	0	0	0	0	0	0	171.672	0
RGMC.37742	d__Bacteria	p__Bacteroidota	c__Bacteroidia	o__Bacteroidales	f__Paludibacteraceae	g__RF16	s__RF16 sp902769535	0	0	0	0	0	0	0	0	127.955	0	153.954	0
RGMC.38550	d__Bacteria	p__Bacteroidota	c__Bacteroidia	o__Bacteroidales	f__Paludibacteraceae	g__RF16	s__RF16 sp902769535	0	0	0	0	0	0	0	0	0	0	122.828	0
RGMC.27526	d__Bacteria	p__Bacteroidota	c__Bacteroidia	o__Bacteroidales	f__Paludibacteraceae	g__RF16	s__RF16 sp902771935	0	207.491	255.586	382.284	319.172	380.702	721.636	604.406	739.797	870.702	830.748	542.249
RGMC.18799	d__Bacteria	p__Bacteroidota	c__Bacteroidia	o__Bacteroidales	f__Paludibacteraceae	g__RF16	s__RF16 sp902771935	0	146.784	185.603	276.448	225.492	276.265	533.244	445.537	540.329	618.308	585.766	396.843
RGMC.40217	d__Bacteria	p__Bacteroidota	c__Bacteroidia	o__Bacteroidales	f__Paludibacteraceae	g__RF16	s__RF16 sp946411385	585.722	706.168	648.457	1113.34	1192.94	933.792	2201.14	1822.71	2191.49	2716.88	2828.09	1686.35
RGMC.20606	d__Bacteria	p__Bacteroidota	c__Bacteroidia	o__Bacteroidales	f__Paludibacteraceae	g__UBA1181	s__UBA1181 sp002310215	5468.14	1421.95	1584.57	1841.66	2173.97	1663.68	1448	1248.54	1302.74	1774.17	1341.45	1764.12
RGMC.38415	d__Bacteria	p__Bacteroidota	c__Bacteroidia	o__Bacteroidales	f__Paludibacteraceae	g__UBA1181	s__UBA1181 sp002310215	2738.88	740.38	832.44	941.891	1110.31	853.073	747.347	629.179	664.632	911.361	699.509	925.899
RGMC.15891	d__Bacteria	p__Bacteroidota	c__Bacteroidia	o__Bacteroidales	f__Paludibacteraceae	g__UBA1181	s__UBA1181 sp002310215	2630.16	704.5	792.809	912.086	1086.78	820.565	704.347	607.411	629.445	881.564	680.395	903.024
RGMC.22984	d__Bacteria	p__Bacteroidota	c__Bacteroidia	o__Bacteroidales	f__Paludibacteraceae	g__UBA1181	s__UBA1181 sp002310215	2542.02	672.482	753.263	870.579	1030.49	804.442	697.087	597.207	611.291	833.644	632.007	833.327
RGMC.22982	d__Bacteria	p__Bacteroidota	c__Bacteroidia	o__Bacteroidales	f__Paludibacteraceae	g__UBA1181	s__UBA1181 sp002310215	2284.53	596.796	674.645	754.713	886.18	692.632	592.217	520.094	530.828	737.726	554.267	743.374
RGMC.39727	d__Bacteria	p__Bacteroidota	c__Bacteroidia	o__Bacteroidales	f__Paludibacteraceae	g__UBA1181	s__UBA1181 sp016285885	522.13	0	0	0	0	0	0	0	0	0	0	0
RGMC.65	d__Bacteria	p__Bacteroidota	c__Bacteroidia	o__Bacteroidales	f__Paludibacteraceae	g__UBA1181	s__UBA1181 sp016285885	458.053	0	0	0	0	0	0	0	0	0	0	0
RGMC.8968	d__Bacteria	p__Bacteroidota	c__Bacteroidia	o__Bacteroidales	f__Paludibacteraceae	g__UBA1181	s__UBA1181 sp016285885	444.137	0	0	0	0	0	0	0	0	0	0	0
RGMC.22851	d__Bacteria	p__Bacteroidota	c__Bacteroidia	o__Bacteroidales	f__Paludibacteraceae	g__UBA1181	s__UBA1181 sp017551675	1831.47	771.198	840.058	1254.85	1686.81	1152.69	1009.12	949.672	1116.3	1604.5	1450.08	1151.43
RGMC.16072	d__Bacteria	p__Bacteroidota	c__Bacteroidia	o__Bacteroidales	f__Paludibacteraceae	g__UBA1181	s__UBA1181 sp017551675	1189.91	507.71	552.521	800.638	1061	744.726	668.425	611.933	718.163	1023.73	901.553	760.467
RGMC.16314	d__Bacteria	p__Bacteroidota	c__Bacteroidia	o__Bacteroidales	f__Paludibacteraceae	g__UBA1181	s__UBA1181 sp017551675	996.503	424.229	466.324	680.192	922.538	629.191	553.125	508.763	603.894	868.193	784.391	648.086
RGMC.36830	d__Bacteria	p__Bacteroidota	c__Bacteroidia	o__Bacteroidales	f__Paludibacteraceae	g__UBA1723	s__	235.016	256.372	242.278	456.551	556.401	411.303	506.71	468.928	543.961	592.823	595.451	439.17
RGMC.30185	d__Bacteria	p__Bacteroidota	c__Bacteroidia	o__Bacteroidales	f__Paludibacteraceae	g__UBA1723	s__UBA1723 sp002371265	1343.49	1487.97	1396.38	2686.72	3421.75	2351.19	2901.93	2829.71	3216.37	3641.73	3798.19	2391.98
RGMC.31163	d__Bacteria	p__Bacteroidota	c__Bacteroidia	o__Bacteroidales	f__Paludibacteraceae	g__UBA1723	s__UBA1723 sp002371265	1271.73	1428.65	1330.59	2642.24	3336.36	2345.87	2790.8	2714.23	3117.09	3496.18	3610.7	2266.8
RGMC.34371	d__Bacteria	p__Bacteroidota	c__Bacteroidia	o__Bacteroidales	f__Paludibacteraceae	g__UBA1723	s__UBA1723 sp002371265	1175.71	1305.6	1225.92	2400.48	3036.63	2147.9	2577.34	2486.18	2895.18	3199.6	3274.46	2110.66
RGMC.6726	d__Bacteria	p__Bacteroidota	c__Bacteroidia	o__Bacteroidales	f__Paludibacteraceae	g__UBA1723	s__UBA1723 sp002371265	855.898	931.546	875.391	1702.7	2197.21	1494.86	1780.32	1779.29	2004.31	2256.05	2379	1470.89
RGMC.7560	d__Bacteria	p__Bacteroidota	c__Bacteroidia	o__Bacteroidales	f__Paludibacteraceae	g__UBA1723	s__UBA1723 sp002371265	690.652	742.513	689.846	1383.96	1764.46	1206.13	1413.83	1412.17	1621.25	1804.36	1880.96	1175.38
RGMC.7652	d__Bacteria	p__Bacteroidota	c__Bacteroidia	o__Bacteroidales	f__Paludibacteraceae	g__UBA1723	s__UBA1723 sp002371265	409.079	447.492	423.268	801.767	1012.72	728.764	897.757	854.189	987.77	1073.4	1099.22	744.308
RGMC.32481	d__Bacteria	p__Bacteroidota	c__Bacteroidia	o__Bacteroidales	f__Paludibacteraceae	g__UBA1723	s__UBA1723 sp002371265	381.31	412.351	381.496	744.293	930.916	656.24	807.345	769.556	886.655	991.911	1011.63	672.384
RGMC.11805	d__Bacteria	p__Bacteroidota	c__Bacteroidia	o__Bacteroidales	f__Paludibacteraceae	g__UBA1723	s__UBA1723 sp002371265	352.793	379.684	355.897	675.828	839.616	609.15	763.524	724.22	838.276	923.201	951.558	632.852
RGMC.2347	d__Bacteria	p__Bacteroidota	c__Bacteroidia	o__Bacteroidales	f__Paludibacteraceae	g__UBA1723	s__UBA1723 sp002371265	327.087	363.472	345.542	644.207	804.284	576.355	701.906	688.911	779.528	857.77	876.536	580.151
RGMC.29242	d__Bacteria	p__Bacteroidota	c__Bacteroidia	o__Bacteroidales	f__Paludibacteraceae	g__UBA1723	s__UBA1723 sp002371265	317.994	347.654	323.108	619.658	767.476	545.378	686.983	647.755	749.216	821.441	856.16	556.663
RGMC.5465	d__Bacteria	p__Bacteroidota	c__Bacteroidia	o__Bacteroidales	f__Paludibacteraceae	g__UBA1723	s__UBA1723 sp002371265	307.353	329.181	307.67	586.697	713.04	528.238	671.246	634.934	735.674	770.632	783.005	558.389
RGMC.12359	d__Bacteria	p__Bacteroidota	c__Bacteroidia	o__Bacteroidales	f__Paludibacteraceae	g__UBA1723	s__UBA1723 sp002371265	323.577	331.005	322.067	553.348	657.8	538.473	664.558	619.876	707.697	715.199	708.228	565.91
RGMC.7576	d__Bacteria	p__Bacteroidota	c__Bacteroidia	o__Bacteroidales	f__Paludibacteraceae	g__UBA1723	s__UBA1723 sp002371265	256.061	343.021	310.864	579.181	791.048	433.969	525.914	558.685	575.873	744.144	787.194	506.369
RGMC.24576	d__Bacteria	p__Bacteroidota	c__Bacteroidia	o__Bacteroidales	f__Paludibacteraceae	g__UBA1723	s__UBA1723 sp002371265	271.05	284.761	286.61	487.67	582.859	483.71	588.017	550.889	636.049	634.51	627.908	496.677
RGMC.17452	d__Bacteria	p__Bacteroidota	c__Bacteroidia	o__Bacteroidales	f__Paludibacteraceae	g__UBA1723	s__UBA1723 sp002371265	249.807	275.295	257.964	491.167	590.068	433.609	538.208	511.858	586.992	654.76	662.17	448.499
RGMC.24539	d__Bacteria	p__Bacteroidota	c__Bacteroidia	o__Bacteroidales	f__Paludibacteraceae	g__UBA1723	s__UBA1723 sp002371265	256.712	271.897	260.766	458.164	554.62	426.016	524.236	505.797	567.407	602.376	604.894	440.558
RGMC.13657	d__Bacteria	p__Bacteroidota	c__Bacteroidia	o__Bacteroidales	f__Paludibacteraceae	g__UBA1723	s__UBA1723 sp002371265	249.12	257.046	258.562	437.498	525.905	411.059	514.886	480.918	545.866	560.773	564.962	436.176
RGMC.15388	d__Bacteria	p__Bacteroidota	c__Bacteroidia	o__Bacteroidales	f__Paludibacteraceae	g__UBA1723	s__UBA1723 sp002371265	239.841	261.153	250.202	460.548	561.263	409.113	493.218	486.427	547.369	597.444	611.616	423.753
RGMC.591	d__Bacteria	p__Bacteroidota	c__Bacteroidia	o__Bacteroidales	f__Paludibacteraceae	g__UBA1723	s__UBA1723 sp002371265	235.005	243.503	235.814	438.269	525.582	395.493	505.992	475.207	548.717	581.259	603.848	425.891
RGMC.26354	d__Bacteria	p__Bacteroidota	c__Bacteroidia	o__Bacteroidales	f__Paludibacteraceae	g__UBA1723	s__UBA1723 sp002371265	220.56	241.868	226.972	430.746	529.735	378.847	469.959	452.969	512.081	559.562	555.072	384.796
RGMC.28685	d__Bacteria	p__Bacteroidota	c__Bacteroidia	o__Bacteroidales	f__Paludibacteraceae	g__UBA1723	s__UBA1723 sp002371265	0	240.192	229.014	426.058	531.357	374.873	466.246	456.067	513.09	560.184	573.392	389.37
RGMC.26479	d__Bacteria	p__Bacteroidota	c__Bacteroidia	o__Bacteroidales	f__Paludibacteraceae	g__UBA1723	s__UBA1723 sp002371265	204.292	231.869	215.006	412.502	516.172	362.565	452.367	433.832	493.017	539.431	567.314	371.699
RGMC.17378	d__Bacteria	p__Bacteroidota	c__Bacteroidia	o__Bacteroidales	f__Paludibacteraceae	g__UBA1723	s__UBA1723 sp002371265	0	209.037	0	370.932	462.409	329.328	399.097	399.426	440.848	491.478	499.617	334.133
RGMC.33117	d__Bacteria	p__Bacteroidota	c__Bacteroidia	o__Bacteroidales	f__Paludibacteraceae	g__UBA1723	s__UBA1723 sp002392915	0	0	0	367.675	429.187	325.879	419.397	0	468.842	486.222	488.58	350.505
RGMC.9750	d__Bacteria	p__Bacteroidota	c__Bacteroidia	o__Bacteroidales	f__Paludibacteraceae	g__UBA1723	s__UBA1723 sp002392915	0	0	0	322.179	400.181	289.692	357.545	352.069	389.981	427.986	431.486	299.872
RGMC.7911	d__Bacteria	p__Bacteroidota	c__Bacteroidia	o__Bacteroidales	f__Paludibacteraceae	g__UBA1723	s__UBA1723 sp002392915	0	0	0	313.556	380.473	273.196	350.243	332.789	377.901	415.059	423.644	296.157
RGMC.35929	d__Bacteria	p__Bacteroidota	c__Bacteroidia	o__Bacteroidales	f__Paludibacteraceae	g__UBA1723	s__UBA1723 sp002392915	0	0	0	298.831	368.132	266.134	334.449	320.213	359.655	397.669	397.273	286.905
RGMC.6271	d__Bacteria	p__Bacteroidota	c__Bacteroidia	o__Bacteroidales	f__Paludibacteraceae	g__UBA1723	s__UBA1723 sp002392915	0	0	0	306.87	374.89	272.214	322.702	322.376	355.873	395.493	400.118	277.924
RGMC.27852	d__Bacteria	p__Bacteroidota	c__Bacteroidia	o__Bacteroidales	f__Paludibacteraceae	g__UBA1723	s__UBA1723 sp002392915	0	0	0	0	0	0	0	0	0	0	0	0
RGMC.12755	d__Bacteria	p__Bacteroidota	c__Bacteroidia	o__Bacteroidales	f__Paludibacteraceae	g__UBA4363	s__UBA4363 sp017446585	0	0	0	0	0	0	0	0	0	0	0	0
RGMC.692	d__Bacteria	p__Bacteroidota	c__Bacteroidia	o__Bacteroidales	f__Paludibacteraceae	g__UBA4363	s__UBA4363 sp017446585	0	0	0	0	0	0	0	0	0	0	0	0
RGMC.29978	d__Bacteria	p__Bacteroidota	c__Bacteroidia	o__Bacteroidales	f__SZUA-534	g__RUG13583	s__	2374.61	1658.74	1765.85	2472.61	2780.18	2529.91	2722.78	2123.32	2886.62	3001.98	3367.17	2469.69
RGMC.15226	d__Bacteria	p__Bacteroidota	c__Bacteroidia	o__Bacteroidales	f__SZUA-534	g__RUG13583	s__RUG13583 sp017527435	0	0	0	0	0	0	134.993	0	156.195	169.389	198.566	125.579
RGMC.15267	d__Bacteria	p__Bacteroidota	c__Bacteroidia	o__Bacteroidales	f__SZUA-534	g__RUG13583	s__RUG13583 sp017527435	0	0	0	0	0	0	120.257	0	141.137	143.033	173.92	111.442
RGMC.2158	d__Bacteria	p__Bacteroidota	c__Bacteroidia	o__Bacteroidales	f__SZUA-534	g__RUG13583	s__RUG13583 sp017527435	0	0	0	0	0	0	0	0	0	0	166.672	0
RGMC.20567	d__Bacteria	p__Bacteroidota	c__Bacteroidia	o__Bacteroidales	f__SZUA-534	g__RUG13583	s__RUG13583 sp902790595	0	0	0	0	0	0	0	0	0	0	251.017	0
RGMC.19588	d__Bacteria	p__Bacteroidota	c__Bacteroidia	o__Bacteroidales	f__SZUA-534	g__RUG13583	s__RUG13583 sp946404125	0	0	0	0	0	0	0	0	0	0	299.723	0
RGMC.9372	d__Bacteria	p__Bacteroidota	c__Bacteroidia	o__Bacteroidales	f__SZUA-534	g__RUG13583	s__RUG13583 sp946404125	0	0	0	0	0	0	0	0	0	0	0	0
RGMC.15357	d__Bacteria	p__Bacteroidota	c__Bacteroidia	o__Bacteroidales	f__SZUA-534	g__RUG13583	s__RUG13583 sp946404125	0	0	0	0	0	0	0	0	0	0	0	0
RGMC.10786	d__Bacteria	p__Bacteroidota	c__Bacteroidia	o__Bacteroidales	f__UBA1402	g__UBA1757	s__UBA1757 sp017446025	0	0	0	0	0	0	0	0	0	0	0	0
RGMC.14966	d__Bacteria	p__Bacteroidota	c__Bacteroidia	o__Bacteroidales	f__UBA1715	g__UBA1715	s__UBA1715 sp017516865	0	0	0	103.358	0	101.662	124.651	0	127.65	139.363	141.017	96.3291
RGMC.29254	d__Bacteria	p__Bacteroidota	c__Bacteroidia	o__Bacteroidales	f__UBA1715	g__UBA1715	s__UBA1715 sp017516865	0	0	0	0	0	0	0	0	0	0	0	0
RGMC.15048	d__Bacteria	p__Bacteroidota	c__Bacteroidia	o__Bacteroidales	f__UBA3663	g__UBA3663	s__	0	0	0	0	0	0	0	0	274.077	238.555	245.703	0
RGMC.19235	d__Bacteria	p__Bacteroidota	c__Bacteroidia	o__Bacteroidales	f__UBA3663	g__UBA3663	s__UBA3663 sp902776605	454.899	368.677	445.231	744.216	740.236	618.49	1356.42	950.296	1741.46	1424.68	1653.95	1022.65
RGMC.248	d__Bacteria	p__Bacteroidota	c__Bacteroidia	o__Bacteroidales	f__UBA3663	g__UBA3663	s__UBA3663 sp902776605	354.792	292.806	343.93	584.222	571.352	492.621	1049.77	779.348	1367.92	1148.65	1270.97	805.901
RGMC.30650	d__Bacteria	p__Bacteroidota	c__Bacteroidia	o__Bacteroidales	f__UBA3663	g__UBA3663	s__UBA3663 sp902776605	358.193	294.382	348.451	565.999	538.058	483.849	1054.92	767.897	1371.67	1114.58	1215.81	779.128
RGMC.12830	d__Bacteria	p__Bacteroidota	c__Bacteroidia	o__Bacteroidales	f__UBA3663	g__UBA3663	s__UBA3663 sp902776605	254.5	219.246	250.367	420.263	401.04	348.074	766.418	550.443	981.065	808.682	875.8	550.519
RGMC.30381	d__Bacteria	p__Bacteroidota	c__Bacteroidia	o__Bacteroidales	f__UBA3824	g__UBA3824	s__	220.817	125.066	165.498	323.385	238.185	176.891	539.242	480.499	593.972	639.68	650.153	445.975
RGMC.16159	d__Bacteria	p__Bacteroidota	c__Bacteroidia	o__Bacteroidales	f__UBA3824	g__UBA3824	s__	158.328	0	119.799	221.362	160.516	121.683	363.131	329.705	401.481	425.438	425.643	330.044
RGMC.3866	d__Bacteria	p__Bacteroidota	c__Bacteroidia	o__Bacteroidales	f__UBA3824	g__UBA3824	s__	117.82	0	0	166.635	124.969	88.8898	285.751	258.314	313.919	343.195	342.581	231.056
RGMC.36740	d__Bacteria	p__Bacteroidota	c__Bacteroidia	o__Bacteroidales	f__UBA3824	g__UBA3824	s__UBA3824 sp017394445	575.44	251.001	0	492.321	452.613	340.122	588.391	616.636	672.383	795.693	805.108	561.905
RGMC.3885	d__Bacteria	p__Bacteroidota	c__Bacteroidia	o__Bacteroidales	f__UBA3824	g__UBA3824	s__UBA3824 sp017394445	441.445	199.801	198.463	399.958	338.929	274.026	490.482	521.997	565.899	647.521	658.547	469.884
RGMC.3927	d__Bacteria	p__Bacteroidota	c__Bacteroidia	o__Bacteroidales	f__UBA3824	g__UBA3824	s__UBA3824 sp017394445	391.735	175.783	174.701	352.102	300.688	242.258	430.996	450.748	501.125	573.427	587.141	421.613
RGMC.3898	d__Bacteria	p__Bacteroidota	c__Bacteroidia	o__Bacteroidales	f__UBA3824	g__UBA3824	s__UBA3824 sp017394445	391.179	176.398	169.607	350.914	291.496	235.136	436.339	450.59	491.054	565.153	567.231	408.55
RGMC.17494	d__Bacteria	p__Bacteroidota	c__Bacteroidia	o__Bacteroidales	f__UBA3824	g__UBA3824	s__UBA3824 sp017394445	226.657	0	0	206.184	181.551	137.834	257.101	265.832	289.745	329.572	336.239	239.672
RGMC.1546	d__Bacteria	p__Bacteroidota	c__Bacteroidia	o__Bacteroidales	f__UBA3824	g__UBA3824	s__UBA3824 sp017530465	0	0	0	0	0	0	0	0	138.258	0	142.157	0
RGMC.23777	d__Bacteria	p__Bacteroidota	c__Bacteroidia	o__Bacteroidales	f__UBA3824	g__UBA3824	s__UBA3824 sp017530465	0	0	0	0	0	0	0	0	126.771	0	0	0
RGMC.337	d__Bacteria	p__Bacteroidota	c__Bacteroidia	o__Bacteroidales	f__UBA4181	g__UBA4181	s__UBA4181 sp017523725	229.548	153.874	176.614	182.403	169.357	175.245	252.719	199.952	203.196	272.436	224.507	204.274
RGMC.708	d__Bacteria	p__Bacteroidota	c__Bacteroidia	o__Bacteroidales	f__UBA4181	g__UBA4181	s__UBA4181 sp017523725	208.401	158.464	0	187.389	0	168.876	232.773	186.939	184.47	274.226	237.989	204.601
RGMC.14850	d__Bacteria	p__Bacteroidota	c__Bacteroidia	o__Bacteroidales	f__UBA4181	g__UBA4181	s__UBA4181 sp017523725	208.22	141.26	0	159.203	157.618	157.368	219.22	174.259	177.831	239.838	199.793	182.851
RGMC.12345	d__Bacteria	p__Bacteroidota	c__Bacteroidia	o__Bacteroidales	f__UBA4181	g__UBA4181	s__UBA4181 sp017523725	0	0	0	0	0	0	0	0	0	0	0	0
RGMC.12835	d__Bacteria	p__Bacteroidota	c__Bacteroidia	o__Bacteroidales	f__UBA4181	g__UBA4181	s__UBA4181 sp017523725	0	0	0	0	0	0	0	0	0	0	0	0
RGMC.40583	d__Bacteria	p__Bacteroidota	c__Bacteroidia	o__Bacteroidales	f__UBA932	g__Bact-11	s__	10130.7	7402.37	7228.75	7906.68	8186.24	7204.63	9582.13	8653.82	9169.95	10574.8	9658.35	9677.11
RGMC.1675	d__Bacteria	p__Bacteroidota	c__Bacteroidia	o__Bacteroidales	f__UBA932	g__Bact-11	s__	518.175	488.161	447.408	576.846	638.533	520.773	501.848	479.555	492.345	611.265	550.337	435.97
RGMC.10913	d__Bacteria	p__Bacteroidota	c__Bacteroidia	o__Bacteroidales	f__UBA932	g__Bact-11	s__	328.47	265.792	264.8	274.16	283.964	235.988	233.895	208.584	214.756	250.029	232.532	234.805
RGMC.2618	d__Bacteria	p__Bacteroidota	c__Bacteroidia	o__Bacteroidales	f__UBA932	g__Bact-11	s__Bact-11 sp002361615	429.014	282.959	279.926	279.877	306.344	258.688	0	222.487	234.7	262.977	242.709	269.057
RGMC.133	d__Bacteria	p__Bacteroidota	c__Bacteroidia	o__Bacteroidales	f__UBA932	g__Bact-11	s__Bact-11 sp002361615	596.178	323.196	332.044	295.386	304.755	282.734	0	0	0	265.57	240.977	295.915
RGMC.28641	d__Bacteria	p__Bacteroidota	c__Bacteroidia	o__Bacteroidales	f__UBA932	g__Bact-11	s__Bact-11 sp002361615	422.717	264.01	262.122	241.626	255.542	230.34	231.574	0	234.897	230.173	212.97	255.184
RGMC.2404	d__Bacteria	p__Bacteroidota	c__Bacteroidia	o__Bacteroidales	f__UBA932	g__Bact-11	s__Bact-11 sp002361615	359.444	244.733	241.402	241.696	265.474	231.127	0	0	224.081	268.935	237.36	253.743
RGMC.37668	d__Bacteria	p__Bacteroidota	c__Bacteroidia	o__Bacteroidales	f__UBA932	g__Bact-11	s__Bact-11 sp002361615	432.794	270.062	269.627	262.915	280.916	241.575	0	0	0	232.767	200.464	230.013
RGMC.7288	d__Bacteria	p__Bacteroidota	c__Bacteroidia	o__Bacteroidales	f__UBA932	g__Bact-11	s__Bact-11 sp002361615	249.8	191.37	183.304	189.408	203.965	170.858	173	160.496	155.842	187.894	165.984	178.519
RGMC.21865	d__Bacteria	p__Bacteroidota	c__Bacteroidia	o__Bacteroidales	f__UBA932	g__Bact-11	s__Bact-11 sp002361615	413.284	268.616	0	263.536	286.163	237.021	0	0	0	248.1	218.923	251.74
RGMC.20564	d__Bacteria	p__Bacteroidota	c__Bacteroidia	o__Bacteroidales	f__UBA932	g__Bact-11	s__Bact-11 sp002361615	349.186	210.276	208.673	201.672	218.823	186.411	0	0	0	189.24	165.386	183.967
RGMC.15384	d__Bacteria	p__Bacteroidota	c__Bacteroidia	o__Bacteroidales	f__UBA932	g__Bact-11	s__Bact-11 sp002361615	353.216	220.261	0	202.352	208.949	197.692	0	0	0	0	179.376	239.132
RGMC.2482	d__Bacteria	p__Bacteroidota	c__Bacteroidia	o__Bacteroidales	f__UBA932	g__Bact-11	s__Bact-11 sp002361615	238.801	185.324	0	183.623	206.636	162.992	0	0	0	177.954	175.072	164.549
RGMC.12348	d__Bacteria	p__Bacteroidota	c__Bacteroidia	o__Bacteroidales	f__UBA932	g__Bact-11	s__Bact-11 sp002361615	279.974	189.75	0	188.229	198.738	172.729	0	0	0	0	0	182.819
RGMC.21374	d__Bacteria	p__Bacteroidota	c__Bacteroidia	o__Bacteroidales	f__UBA932	g__Bact-11	s__Bact-11 sp002361615	220.997	172.846	150.786	162.621	188.345	140.004	0	0	0	0	0	143.598
RGMC.9361	d__Bacteria	p__Bacteroidota	c__Bacteroidia	o__Bacteroidales	f__UBA932	g__Bact-11	s__Bact-11 sp002361615	185.395	145.703	0	139.451	163.102	124.724	0	0	0	147.55	0	126.912
RGMC.9010	d__Bacteria	p__Bacteroidota	c__Bacteroidia	o__Bacteroidales	f__UBA932	g__Bact-11	s__Bact-11 sp002361615	149.447	0	0	0	0	0	0	0	0	0	0	0
RGMC.2	d__Bacteria	p__Bacteroidota	c__Bacteroidia	o__Bacteroidales	f__UBA932	g__Bact-11	s__Bact-11 sp016284265	0	209.841	0	0	0	0	0	0	0	225.051	251.207	210.359
RGMC.3756	d__Bacteria	p__Bacteroidota	c__Bacteroidia	o__Bacteroidales	f__UBA932	g__Bact-11	s__Bact-11 sp016284265	0	0	0	0	0	0	0	0	0	0	0	0
RGMC.12266	d__Bacteria	p__Bacteroidota	c__Bacteroidia	o__Bacteroidales	f__UBA932	g__Bact-11	s__Bact-11 sp017428245	693.637	531.685	532.293	543.738	573.962	486.347	485.11	430.457	462.286	498.51	481.395	491.537
RGMC.39887	d__Bacteria	p__Bacteroidota	c__Bacteroidia	o__Bacteroidales	f__UBA932	g__Bact-11	s__Bact-11 sp017428245	585.836	465.804	460.012	492.6	525.97	416.991	403.781	386.165	397.984	463.683	439.916	428.889
RGMC.12163	d__Bacteria	p__Bacteroidota	c__Bacteroidia	o__Bacteroidales	f__UBA932	g__Bact-11	s__Bact-11 sp017430365	176.951	203.583	203.381	217.542	236.683	197.992	209.495	195.665	206.963	231.404	250.531	201.332
RGMC.12712	d__Bacteria	p__Bacteroidota	c__Bacteroidia	o__Bacteroidales	f__UBA932	g__Bact-11	s__Bact-11 sp017447265	4831.89	3919.11	3672.59	4367.97	4135.36	4072.91	7161.71	6002.42	7011.83	8084.89	6859.94	6211.18
RGMC.29999	d__Bacteria	p__Bacteroidota	c__Bacteroidia	o__Bacteroidales	f__UBA932	g__Bact-11	s__Bact-11 sp017447265	1969.52	1652.97	1539.65	1820.08	1686.6	1657.12	2955.04	2411.95	2789.1	3092.39	2702.61	2453.17
RGMC.10943	d__Bacteria	p__Bacteroidota	c__Bacteroidia	o__Bacteroidales	f__UBA932	g__Bact-11	s__Bact-11 sp017447265	1483.99	1309.58	1179.11	1445.66	1382.57	1286.05	2284.24	1933.24	2155.09	2521.36	2246.45	1884.56
RGMC.29958	d__Bacteria	p__Bacteroidota	c__Bacteroidia	o__Bacteroidales	f__UBA932	g__Bact-11	s__Bact-11 sp017447265	1153.02	1108.11	952.258	1311.18	1378.89	1043.56	1736.61	1611.52	1794.56	2116.03	2090.33	1570.45
RGMC.15304	d__Bacteria	p__Bacteroidota	c__Bacteroidia	o__Bacteroidales	f__UBA932	g__Cryptobacteroides	s__	1333.98	1191.73	1184.48	1185.93	1355.81	1002.67	1303.72	1319.09	1365.04	1249.15	1606.8	1283.86
RGMC.2577	d__Bacteria	p__Bacteroidota	c__Bacteroidia	o__Bacteroidales	f__UBA932	g__Cryptobacteroides	s__	1561.64	1302.4	1369.35	1125.48	1058.65	1111.32	1437.6	1304.02	1392.52	1044.24	1214.5	1278.64
RGMC.29759	d__Bacteria	p__Bacteroidota	c__Bacteroidia	o__Bacteroidales	f__UBA932	g__Cryptobacteroides	s__	1298.99	1111.38	1174.79	1029.8	1068.37	1011.13	1247.13	1091.4	1199.66	987.75	1164.62	1121.45
RGMC.14802	d__Bacteria	p__Bacteroidota	c__Bacteroidia	o__Bacteroidales	f__UBA932	g__Cryptobacteroides	s__	805.7	599.684	604.029	682.443	719.27	568.013	582.592	436.716	578.885	608.501	708.764	540.582
RGMC.29357	d__Bacteria	p__Bacteroidota	c__Bacteroidia	o__Bacteroidales	f__UBA932	g__Cryptobacteroides	s__	494.561	439.57	403.334	595.987	501.851	557.376	585.846	665.064	601.937	638.271	587.423	419.531
RGMC.39607	d__Bacteria	p__Bacteroidota	c__Bacteroidia	o__Bacteroidales	f__UBA932	g__Cryptobacteroides	s__	643.652	575.314	532.649	550.514	612.489	486.228	580.618	460.427	575.376	519.526	541.152	599.008
RGMC.39667	d__Bacteria	p__Bacteroidota	c__Bacteroidia	o__Bacteroidales	f__UBA932	g__Cryptobacteroides	s__	333.109	294.571	336.543	340.168	323.255	366.842	646.383	476.403	583.88	522.666	513.364	458.262
RGMC.39845	d__Bacteria	p__Bacteroidota	c__Bacteroidia	o__Bacteroidales	f__UBA932	g__Cryptobacteroides	s__	263.733	279.956	328.344	332.707	299.77	359.021	623.499	441.833	566.252	460.833	447.487	411.428
RGMC.1316	d__Bacteria	p__Bacteroidota	c__Bacteroidia	o__Bacteroidales	f__UBA932	g__Cryptobacteroides	s__	494.293	373.749	386.325	401.403	403.234	350.023	385.391	289.252	366.899	393.862	399.99	351.99
RGMC.37743	d__Bacteria	p__Bacteroidota	c__Bacteroidia	o__Bacteroidales	f__UBA932	g__Cryptobacteroides	s__	498.917	255.393	267.638	312.068	268.881	290.858	470.752	360.983	421.001	436.989	380.865	389.337
RGMC.29695	d__Bacteria	p__Bacteroidota	c__Bacteroidia	o__Bacteroidales	f__UBA932	g__Cryptobacteroides	s__	0	205.796	237.58	239.738	223.307	255.914	429.761	322.753	389.279	327.802	319.346	308.545
RGMC.23790	d__Bacteria	p__Bacteroidota	c__Bacteroidia	o__Bacteroidales	f__UBA932	g__Cryptobacteroides	s__	354.789	297.513	308.485	305.229	302.767	264.049	339.83	276.248	314.016	313.905	314.325	328.532
RGMC.23224	d__Bacteria	p__Bacteroidota	c__Bacteroidia	o__Bacteroidales	f__UBA932	g__Cryptobacteroides	s__	0	0	0	233.929	229.572	222.082	345.385	0	324.819	292.28	278.942	283.577
RGMC.23707	d__Bacteria	p__Bacteroidota	c__Bacteroidia	o__Bacteroidales	f__UBA932	g__Cryptobacteroides	s__	0	0	0	0	0	0	334.093	252.173	310.674	285.531	288.314	229.906
RGMC.40699	d__Bacteria	p__Bacteroidota	c__Bacteroidia	o__Bacteroidales	f__UBA932	g__Cryptobacteroides	s__	141.902	145.135	143.325	162.665	185.361	159.319	238.246	210.283	224.655	251.055	255.925	173.013
RGMC.23922	d__Bacteria	p__Bacteroidota	c__Bacteroidia	o__Bacteroidales	f__UBA932	g__Cryptobacteroides	s__	446.021	357.423	364.752	306.698	294.582	312.401	0	0	0	0	0	276.584
RGMC.40292	d__Bacteria	p__Bacteroidota	c__Bacteroidia	o__Bacteroidales	f__UBA932	g__Cryptobacteroides	s__	275.085	189.312	199.035	191.516	0	175.673	0	0	0	0	166.028	158.358
RGMC.25537	d__Bacteria	p__Bacteroidota	c__Bacteroidia	o__Bacteroidales	f__UBA932	g__Cryptobacteroides	s__	0	0	0	0	0	0	232.958	0	236.878	224.911	216.604	0
RGMC.25632	d__Bacteria	p__Bacteroidota	c__Bacteroidia	o__Bacteroidales	f__UBA932	g__Cryptobacteroides	s__	0	0	0	0	0	0	0	0	258.269	0	226.618	0
RGMC.27085	d__Bacteria	p__Bacteroidota	c__Bacteroidia	o__Bacteroidales	f__UBA932	g__Cryptobacteroides	s__	0	0	0	0	0	0	151.188	0	159.222	0	172.917	0
RGMC.39336	d__Bacteria	p__Bacteroidota	c__Bacteroidia	o__Bacteroidales	f__UBA932	g__Cryptobacteroides	s__	226.657	0	0	141.744	0	0	0	0	0	162.473	0	135.358
RGMC.23392	d__Bacteria	p__Bacteroidota	c__Bacteroidia	o__Bacteroidales	f__UBA932	g__Cryptobacteroides	s__	0	0	0	0	0	0	0	0	0	0	129.713	0
RGMC.28955	d__Bacteria	p__Bacteroidota	c__Bacteroidia	o__Bacteroidales	f__UBA932	g__Cryptobacteroides	s__	0	0	0	0	0	0	0	0	0	0	0	0
RGMC.38935	d__Bacteria	p__Bacteroidota	c__Bacteroidia	o__Bacteroidales	f__UBA932	g__Cryptobacteroides	s__	163.385	0	0	0	0	0	0	0	0	0	0	0
RGMC.39195	d__Bacteria	p__Bacteroidota	c__Bacteroidia	o__Bacteroidales	f__UBA932	g__Cryptobacteroides	s__Cryptobacteroides sp002309995	235.356	0	0	0	0	197.747	181.769	0	168.916	364.976	198.937	233.562
RGMC.29278	d__Bacteria	p__Bacteroidota	c__Bacteroidia	o__Bacteroidales	f__UBA932	g__Cryptobacteroides	s__Cryptobacteroides sp002309995	159.539	0	0	0	0	0	0	0	0	0	0	131.62
RGMC.148	d__Bacteria	p__Bacteroidota	c__Bacteroidia	o__Bacteroidales	f__UBA932	g__Cryptobacteroides	s__Cryptobacteroides sp016287875	0	0	0	0	0	0	0	0	0	0	0	0
RGMC.9349	d__Bacteria	p__Bacteroidota	c__Bacteroidia	o__Bacteroidales	f__UBA932	g__Cryptobacteroides	s__Cryptobacteroides sp016287875	0	0	0	0	0	0	0	0	0	0	0	0
RGMC.417	d__Bacteria	p__Bacteroidota	c__Bacteroidia	o__Bacteroidales	f__UBA932	g__Cryptobacteroides	s__Cryptobacteroides sp016287875	0	0	0	0	0	0	0	0	0	0	0	0
RGMC.16854	d__Bacteria	p__Bacteroidota	c__Bacteroidia	o__Bacteroidales	f__UBA932	g__Cryptobacteroides	s__Cryptobacteroides sp017400135	1018.64	574.366	648.237	558.737	543.489	567.94	703.023	0	646.275	615.279	526.83	769.53
RGMC.39640	d__Bacteria	p__Bacteroidota	c__Bacteroidia	o__Bacteroidales	f__UBA932	g__Cryptobacteroides	s__Cryptobacteroides sp017400135	0	0	0	0	0	0	0	0	0	0	0	760.367
RGMC.14067	d__Bacteria	p__Bacteroidota	c__Bacteroidia	o__Bacteroidales	f__UBA932	g__Cryptobacteroides	s__Cryptobacteroides sp017423025	240.887	237.816	212.243	240.426	212.652	222.005	472.837	436.757	444.007	493.499	323.83	387.869
RGMC.23875	d__Bacteria	p__Bacteroidota	c__Bacteroidia	o__Bacteroidales	f__UBA932	g__Cryptobacteroides	s__Cryptobacteroides sp017427385	492.271	501.581	476.598	609.511	687.956	570.269	817.647	698.565	800.691	844.483	829.284	655.295
RGMC.12303	d__Bacteria	p__Bacteroidota	c__Bacteroidia	o__Bacteroidales	f__UBA932	g__Cryptobacteroides	s__Cryptobacteroides sp017427385	405.586	410.499	397.342	518.743	578.561	483.978	747.692	589.21	726.889	780.439	748.712	571.399
RGMC.12242	d__Bacteria	p__Bacteroidota	c__Bacteroidia	o__Bacteroidales	f__UBA932	g__Cryptobacteroides	s__Cryptobacteroides sp017428725	0	177.655	187.848	179.395	184.318	170.171	186.4	181.122	155.516	195.898	155.661	182.718
RGMC.15256	d__Bacteria	p__Bacteroidota	c__Bacteroidia	o__Bacteroidales	f__UBA932	g__Cryptobacteroides	s__Cryptobacteroides sp017428725	0	0	0	0	0	114.439	0	0	0	0	0	0
RGMC.12232	d__Bacteria	p__Bacteroidota	c__Bacteroidia	o__Bacteroidales	f__UBA932	g__Cryptobacteroides	s__Cryptobacteroides sp017428945	264.583	286.868	286.852	371.774	350.169	352.207	541.143	415.524	504.806	498.121	468.611	391.849
RGMC.5756	d__Bacteria	p__Bacteroidota	c__Bacteroidia	o__Bacteroidales	f__UBA932	g__Cryptobacteroides	s__Cryptobacteroides sp017429205	365.539	278.361	271.995	246.89	286.322	227.71	0	0	0	0	168.684	188.85
RGMC.12195	d__Bacteria	p__Bacteroidota	c__Bacteroidia	o__Bacteroidales	f__UBA932	g__Cryptobacteroides	s__Cryptobacteroides sp017429765	0	0	0	0	0	0	0	0	0	0	116.005	0
RGMC.39036	d__Bacteria	p__Bacteroidota	c__Bacteroidia	o__Bacteroidales	f__UBA932	g__Cryptobacteroides	s__Cryptobacteroides sp017429885	0	0	0	0	0	0	0	0	137.445	0	135.554	116.073
RGMC.12187	d__Bacteria	p__Bacteroidota	c__Bacteroidia	o__Bacteroidales	f__UBA932	g__Cryptobacteroides	s__Cryptobacteroides sp017429885	0	0	0	0	0	0	0	0	116.439	0	121.667	0
RGMC.158	d__Bacteria	p__Bacteroidota	c__Bacteroidia	o__Bacteroidales	f__UBA932	g__Cryptobacteroides	s__Cryptobacteroides sp017437825	450.63	363.122	454.544	445.245	552.04	437.746	266.633	271.562	170.903	404.577	175.759	386.154
RGMC.12385	d__Bacteria	p__Bacteroidota	c__Bacteroidia	o__Bacteroidales	f__UBA932	g__Cryptobacteroides	s__Cryptobacteroides sp017437825	296.6	258.375	288.899	301.381	318.915	303.591	255.514	263.11	176.959	320.307	151.621	237.149
RGMC.12365	d__Bacteria	p__Bacteroidota	c__Bacteroidia	o__Bacteroidales	f__UBA932	g__Cryptobacteroides	s__Cryptobacteroides sp017438265	0	0	0	0	0	0	0	0	0	0	0	0
RGMC.37368	d__Bacteria	p__Bacteroidota	c__Bacteroidia	o__Bacteroidales	f__UBA932	g__Cryptobacteroides	s__Cryptobacteroides sp017438265	0	0	0	0	0	0	0	0	0	0	0	0
RGMC.37407	d__Bacteria	p__Bacteroidota	c__Bacteroidia	o__Bacteroidales	f__UBA932	g__Cryptobacteroides	s__Cryptobacteroides sp017438265	0	0	0	0	0	0	0	0	0	0	0	0
RGMC.183	d__Bacteria	p__Bacteroidota	c__Bacteroidia	o__Bacteroidales	f__UBA932	g__Cryptobacteroides	s__Cryptobacteroides sp017443465	0	0	0	0	0	0	0	0	0	0	0	0
RGMC.12397	d__Bacteria	p__Bacteroidota	c__Bacteroidia	o__Bacteroidales	f__UBA932	g__Cryptobacteroides	s__Cryptobacteroides sp017443465	0	0	0	0	0	0	0	0	0	0	0	0
RGMC.13064	d__Bacteria	p__Bacteroidota	c__Bacteroidia	o__Bacteroidales	f__UBA932	g__Cryptobacteroides	s__Cryptobacteroides sp017453565	0	0	0	0	0	0	158.441	0	182.413	121.012	169.226	0
RGMC.13002	d__Bacteria	p__Bacteroidota	c__Bacteroidia	o__Bacteroidales	f__UBA932	g__Cryptobacteroides	s__Cryptobacteroides sp017455065	0	0	0	0	0	0	0	0	0	0	0	0
RGMC.14772	d__Bacteria	p__Bacteroidota	c__Bacteroidia	o__Bacteroidales	f__UBA932	g__Cryptobacteroides	s__Cryptobacteroides sp017519865	253.409	188.395	200.056	169.583	0	174.958	254.811	198.782	236.201	210.995	209.232	221.418
RGMC.15225	d__Bacteria	p__Bacteroidota	c__Bacteroidia	o__Bacteroidales	f__UBA932	g__Cryptobacteroides	s__Cryptobacteroides sp017527415	1207.16	1374.09	1337.31	1803.42	1914.51	1687.65	2340.73	1773.39	2389.59	2261.96	2477.67	1971.06
RGMC.17673	d__Bacteria	p__Bacteroidota	c__Bacteroidia	o__Bacteroidales	f__UBA932	g__Cryptobacteroides	s__Cryptobacteroides sp900316245	0	0	0	0	0	0	0	0	0	0	0	0
RGMC.2432	d__Bacteria	p__Bacteroidota	c__Bacteroidia	o__Bacteroidales	f__UBA932	g__Cryptobacteroides	s__Cryptobacteroides sp900316245	0	0	0	0	0	0	0	0	0	0	0	0
RGMC.772	d__Bacteria	p__Bacteroidota	c__Bacteroidia	o__Bacteroidales	f__UBA932	g__Cryptobacteroides	s__Cryptobacteroides sp900316245	0	0	0	0	0	0	0	0	0	0	0	0
RGMC.1536	d__Bacteria	p__Bacteroidota	c__Bacteroidia	o__Bacteroidales	f__UBA932	g__Cryptobacteroides	s__Cryptobacteroides sp900316525	242.269	206.773	0	0	0	189.548	0	0	0	0	0	0
RGMC.10835	d__Bacteria	p__Bacteroidota	c__Bacteroidia	o__Bacteroidales	f__UBA932	g__Cryptobacteroides	s__Cryptobacteroides sp900316525	0	0	0	0	0	0	0	0	0	0	0	0
RGMC.906	d__Bacteria	p__Bacteroidota	c__Bacteroidia	o__Bacteroidales	f__UBA932	g__Cryptobacteroides	s__Cryptobacteroides sp900316955	387.102	346.109	366.647	334	336.413	321.537	341.733	288.191	299.917	294.222	292.103	321.62
RGMC.3666	d__Bacteria	p__Bacteroidota	c__Bacteroidia	o__Bacteroidales	f__UBA932	g__Cryptobacteroides	s__Cryptobacteroides sp900316955	284.422	276.531	276.46	259.223	267.177	256.918	275.281	240.05	236.345	250.481	232.156	234.983
RGMC.38191	d__Bacteria	p__Bacteroidota	c__Bacteroidia	o__Bacteroidales	f__UBA932	g__Cryptobacteroides	s__Cryptobacteroides sp900318015	600.533	659.781	682.278	703.765	793.315	498.506	435.207	368.597	349.778	601.752	563.94	689.268
RGMC.1030	d__Bacteria	p__Bacteroidota	c__Bacteroidia	o__Bacteroidales	f__UBA932	g__Cryptobacteroides	s__Cryptobacteroides sp900318015	624.171	493.126	503.305	452.327	456.689	451.929	330.539	340.29	301.46	314.536	301.056	357.921
RGMC.20222	d__Bacteria	p__Bacteroidota	c__Bacteroidia	o__Bacteroidales	f__UBA932	g__Cryptobacteroides	s__Cryptobacteroides sp900318015	595.838	466.312	488.357	433.213	409.287	424.103	318.103	327.341	276.093	292.109	249.11	328.619
RGMC.21656	d__Bacteria	p__Bacteroidota	c__Bacteroidia	o__Bacteroidales	f__UBA932	g__Cryptobacteroides	s__Cryptobacteroides sp900318015	369.143	299.421	287.985	286.13	292.562	268.675	203.015	213.291	187.351	202.366	184.106	207.709
RGMC.12370	d__Bacteria	p__Bacteroidota	c__Bacteroidia	o__Bacteroidales	f__UBA932	g__Cryptobacteroides	s__Cryptobacteroides sp900319375	0	0	0	0	0	0	0	0	106.611	0	101.034	0
RGMC.15236	d__Bacteria	p__Bacteroidota	c__Bacteroidia	o__Bacteroidales	f__UBA932	g__Cryptobacteroides	s__Cryptobacteroides sp900319375	0	0	0	0	0	0	0	0	106.478	0	0	0
RGMC.9446	d__Bacteria	p__Bacteroidota	c__Bacteroidia	o__Bacteroidales	f__UBA932	g__Cryptobacteroides	s__Cryptobacteroides sp900319375	0	0	0	0	0	0	0	0	0	0	0	0
RGMC.20515	d__Bacteria	p__Bacteroidota	c__Bacteroidia	o__Bacteroidales	f__UBA932	g__Cryptobacteroides	s__Cryptobacteroides sp900319375	0	0	0	0	0	0	0	0	0	0	0	0
RGMC.119	d__Bacteria	p__Bacteroidota	c__Bacteroidia	o__Bacteroidales	f__UBA932	g__Cryptobacteroides	s__Cryptobacteroides sp900320365	0	0	0	0	0	0	0	0	0	0	0	0
RGMC.20259	d__Bacteria	p__Bacteroidota	c__Bacteroidia	o__Bacteroidales	f__UBA932	g__Cryptobacteroides	s__Cryptobacteroides sp900320545	568.8	539.614	551.52	462.164	492.962	415.788	321.177	306.532	287.597	267.381	285.844	296.581
RGMC.41	d__Bacteria	p__Bacteroidota	c__Bacteroidia	o__Bacteroidales	f__UBA932	g__Cryptobacteroides	s__Cryptobacteroides sp900320545	527.58	478.844	504.095	429.033	453.274	389.823	296.255	288.578	250.596	263.546	259.386	279.94
RGMC.1515	d__Bacteria	p__Bacteroidota	c__Bacteroidia	o__Bacteroidales	f__UBA932	g__Cryptobacteroides	s__Cryptobacteroides sp900321245	0	0	0	0	0	0	0	0	0	0	0	0
RGMC.12264	d__Bacteria	p__Bacteroidota	c__Bacteroidia	o__Bacteroidales	f__UBA932	g__Cryptobacteroides	s__Cryptobacteroides sp900321245	0	0	0	0	0	0	0	0	0	0	0	0
RGMC.12428	d__Bacteria	p__Bacteroidota	c__Bacteroidia	o__Bacteroidales	f__UBA932	g__Cryptobacteroides	s__Cryptobacteroides sp902761655	1254.46	701.475	830.469	790.33	930.565	920.667	0	465.817	0	484.339	0	320.054
RGMC.14858	d__Bacteria	p__Bacteroidota	c__Bacteroidia	o__Bacteroidales	f__UBA932	g__Cryptobacteroides	s__Cryptobacteroides sp902761655	309.408	236.184	236.66	253.903	261.124	246.953	0	152.302	0	155.645	0	104.361
RGMC.15337	d__Bacteria	p__Bacteroidota	c__Bacteroidia	o__Bacteroidales	f__UBA932	g__Cryptobacteroides	s__Cryptobacteroides sp902761655	191.586	151.529	0	178.823	188.097	172.39	0	0	0	0	0	0
RGMC.20601	d__Bacteria	p__Bacteroidota	c__Bacteroidia	o__Bacteroidales	f__UBA932	g__Cryptobacteroides	s__Cryptobacteroides sp902761655	182.277	138.383	0	154.301	160.976	157.032	0	0	0	0	0	0
RGMC.29299	d__Bacteria	p__Bacteroidota	c__Bacteroidia	o__Bacteroidales	f__UBA932	g__Cryptobacteroides	s__Cryptobacteroides sp902761655	150.068	109.133	117.084	125.386	123.863	122.896	0	0	0	0	0	0
RGMC.22330	d__Bacteria	p__Bacteroidota	c__Bacteroidia	o__Bacteroidales	f__UBA932	g__Cryptobacteroides	s__Cryptobacteroides sp902761655	168.557	125.648	0	152.092	162.721	135.539	0	0	0	0	0	0
RGMC.15694	d__Bacteria	p__Bacteroidota	c__Bacteroidia	o__Bacteroidales	f__UBA932	g__Cryptobacteroides	s__Cryptobacteroides sp902761655	132.86	97.1147	107.712	112.337	118.322	111.641	0	0	0	0	0	0
RGMC.18672	d__Bacteria	p__Bacteroidota	c__Bacteroidia	o__Bacteroidales	f__UBA932	g__Cryptobacteroides	s__Cryptobacteroides sp902761655	156.182	129.542	0	155.931	0	133.181	0	0	0	0	0	0
RGMC.21496	d__Bacteria	p__Bacteroidota	c__Bacteroidia	o__Bacteroidales	f__UBA932	g__Cryptobacteroides	s__Cryptobacteroides sp902761655	151.086	119.026	0	132.519	0	127.654	0	0	0	0	0	0
RGMC.214	d__Bacteria	p__Bacteroidota	c__Bacteroidia	o__Bacteroidales	f__UBA932	g__Cryptobacteroides	s__Cryptobacteroides sp902761655	157.028	121.682	0	0	0	130.345	0	0	0	0	0	0
RGMC.19797	d__Bacteria	p__Bacteroidota	c__Bacteroidia	o__Bacteroidales	f__UBA932	g__Cryptobacteroides	s__Cryptobacteroides sp902761655	0	0	0	127.85	0	123.543	0	0	0	0	0	0
RGMC.722	d__Bacteria	p__Bacteroidota	c__Bacteroidia	o__Bacteroidales	f__UBA932	g__Cryptobacteroides	s__Cryptobacteroides sp902761655	0	0	0	0	0	211.904	0	0	0	0	0	0
RGMC.20249	d__Bacteria	p__Bacteroidota	c__Bacteroidia	o__Bacteroidales	f__UBA932	g__Cryptobacteroides	s__Cryptobacteroides sp902761655	0	0	0	0	0	114.001	0	0	0	0	0	0
RGMC.20662	d__Bacteria	p__Bacteroidota	c__Bacteroidia	o__Bacteroidales	f__UBA932	g__Cryptobacteroides	s__Cryptobacteroides sp902761655	0	0	0	0	0	111.158	0	0	0	0	0	0
RGMC.19572	d__Bacteria	p__Bacteroidota	c__Bacteroidia	o__Bacteroidales	f__UBA932	g__Cryptobacteroides	s__Cryptobacteroides sp902761655	0	0	0	0	0	95.0418	0	0	0	0	0	0
RGMC.29605	d__Bacteria	p__Bacteroidota	c__Bacteroidia	o__Bacteroidales	f__UBA932	g__Cryptobacteroides	s__Cryptobacteroides sp902774145	197.142	0	0	123.54	0	116.029	0	0	0	0	0	0
RGMC.19031	d__Bacteria	p__Bacteroidota	c__Bacteroidia	o__Bacteroidales	f__UBA932	g__Cryptobacteroides	s__Cryptobacteroides sp902782225	506.997	361.65	360.519	325.33	251.375	356.169	625.993	436.041	588.246	470.951	414.95	543.936
RGMC.19780	d__Bacteria	p__Bacteroidota	c__Bacteroidia	o__Bacteroidales	f__UBA932	g__Cryptobacteroides	s__Cryptobacteroides sp902782225	444.075	281.515	278.784	294.542	223.682	314.275	602.151	416.902	568.946	464.171	390.344	493.299
RGMC.70	d__Bacteria	p__Bacteroidota	c__Bacteroidia	o__Bacteroidales	f__UBA932	g__Cryptobacteroides	s__Cryptobacteroides sp902782225	356.416	245.807	241.552	256.006	199.046	274.089	534.202	360.874	481.591	400.787	345.98	412.81
RGMC.22341	d__Bacteria	p__Bacteroidota	c__Bacteroidia	o__Bacteroidales	f__UBA932	g__Cryptobacteroides	s__Cryptobacteroides sp902785575	0	0	0	0	0	0	0	0	0	0	0	0
RGMC.21286	d__Bacteria	p__Bacteroidota	c__Bacteroidia	o__Bacteroidales	f__UBA932	g__Cryptobacteroides	s__Cryptobacteroides sp902785575	0	0	0	0	0	0	0	0	0	0	0	0
RGMC.14727	d__Bacteria	p__Bacteroidota	c__Bacteroidia	o__Bacteroidales	f__UBA932	g__Cryptobacteroides	s__Cryptobacteroides sp902785575	0	0	0	0	0	0	0	0	0	0	0	0
RGMC.20427	d__Bacteria	p__Bacteroidota	c__Bacteroidia	o__Bacteroidales	f__UBA932	g__Cryptobacteroides	s__Cryptobacteroides sp902785575	0	0	0	0	0	0	0	0	0	0	0	0
RGMC.19495	d__Bacteria	p__Bacteroidota	c__Bacteroidia	o__Bacteroidales	f__UBA932	g__Cryptobacteroides	s__Cryptobacteroides sp902785575	0	0	0	0	0	0	0	0	0	0	0	0
RGMC.20101	d__Bacteria	p__Bacteroidota	c__Bacteroidia	o__Bacteroidales	f__UBA932	g__Cryptobacteroides	s__Cryptobacteroides sp902785575	0	0	0	0	0	0	0	0	0	0	0	0
RGMC.2122	d__Bacteria	p__Bacteroidota	c__Bacteroidia	o__Bacteroidales	f__UBA932	g__Cryptobacteroides	s__Cryptobacteroides sp902785575	0	0	0	0	0	0	0	0	0	0	0	0
RGMC.20248	d__Bacteria	p__Bacteroidota	c__Bacteroidia	o__Bacteroidales	f__UBA932	g__Cryptobacteroides	s__Cryptobacteroides sp902787255	1913.96	1060.33	1264.03	1198.75	1007.53	1077.17	0	0	0	0	0	0
RGMC.12756	d__Bacteria	p__Bacteroidota	c__Bacteroidia	o__Bacteroidales	f__UBA932	g__Cryptobacteroides	s__Cryptobacteroides sp902787255	182.206	237.506	264.136	446.909	438.381	399.169	93.1064	134.485	0	157.615	0	80.0623
RGMC.38765	d__Bacteria	p__Bacteroidota	c__Bacteroidia	o__Bacteroidales	f__UBA932	g__Cryptobacteroides	s__Cryptobacteroides sp902787255	179.651	199.901	234.449	377.324	334.444	354.418	0	123.519	0	145.586	0	0
RGMC.37713	d__Bacteria	p__Bacteroidota	c__Bacteroidia	o__Bacteroidales	f__UBA932	g__Cryptobacteroides	s__Cryptobacteroides sp902787255	0	166.694	210.78	328.075	269.108	337.189	0	0	0	0	0	0
RGMC.18605	d__Bacteria	p__Bacteroidota	c__Bacteroidia	o__Bacteroidales	f__UBA932	g__Cryptobacteroides	s__Cryptobacteroides sp905234795	0	0	0	0	0	0	0	0	0	0	0	0
RGMC.29326	d__Bacteria	p__Bacteroidota	c__Bacteroidia	o__Bacteroidales	f__UBA932	g__Cryptobacteroides	s__Cryptobacteroides sp946184255	246.255	190.09	188.898	198.013	189.328	172.424	192.627	0	177.047	189.266	180.01	174.99
RGMC.15507	d__Bacteria	p__Bacteroidota	c__Bacteroidia	o__Bacteroidales	f__UBA932	g__Cryptobacteroides	s__Cryptobacteroides sp946405645	641.418	480.769	505.596	478.487	488.591	488.17	571.669	485.148	591.635	570.666	616.358	526.626
RGMC.10877	d__Bacteria	p__Bacteroidota	c__Bacteroidia	o__Bacteroidales	f__UBA932	g__Cryptobacteroides	s__Cryptobacteroides sp946406095	0	186.83	0	246.221	233.461	236.871	368.885	265.814	390.262	335.966	366.937	314.637
RGMC.40267	d__Bacteria	p__Bacteroidota	c__Bacteroidia	o__Bacteroidales	f__UBA932	g__Cryptobacteroides	s__Cryptobacteroides sp946406355	358.416	360.625	349.194	402.497	392.183	394.475	1204.46	771.577	1319.58	898.268	1435.93	730.818
RGMC.2415	d__Bacteria	p__Bacteroidota	c__Bacteroidia	o__Bacteroidales	f__UBA932	g__Cryptobacteroides	s__Cryptobacteroides sp946406355	304.596	291.429	285.732	318.67	304.7	314.297	999.54	623.501	1064.22	713.96	1124.91	599.392
RGMC.1704	d__Bacteria	p__Bacteroidota	c__Bacteroidia	o__Bacteroidales	f__UBA932	g__RUG11257	s__RUG11257 sp016290415	0	105.392	0	129.258	0	114.139	154.214	164.278	147.267	160.732	149.029	150.978
RGMC.12840	d__Bacteria	p__Bacteroidota	c__Bacteroidia	o__Bacteroidales	f__UBA932	g__RUG11257	s__RUG11257 sp017445425	157.436	0	0	0	0	0	0	0	0	0	0	116.407
RGMC.12816	d__Bacteria	p__Bacteroidota	c__Bacteroidia	o__Bacteroidales	f__UBA932	g__RUG11257	s__RUG11257 sp017450655	0	0	0	0	0	0	0	0	0	0	0	0
RGMC.10690	d__Bacteria	p__Bacteroidota	c__Bacteroidia	o__Bacteroidales	f__UBA932	g__RUG11257	s__RUG11257 sp017527625	197.625	159.441	0	188.684	190.9	189.646	376.204	260.616	398.377	367.592	444.524	270.931
RGMC.29535	d__Bacteria	p__Bacteroidota	c__Bacteroidia	o__Bacteroidales	f__UBA932	g__RUG11257	s__RUG11257 sp017527625	142.15	120.704	0	148.021	161.064	148.795	323.207	212.501	351.655	333.819	396.548	242.341
RGMC.29618	d__Bacteria	p__Bacteroidota	c__Bacteroidia	o__Bacteroidales	f__UBA932	g__RUG11257	s__RUG11257 sp017527625	0	0	0	0	0	111.013	227.612	160.41	245.64	230.292	256.184	173.233
RGMC.15199	d__Bacteria	p__Bacteroidota	c__Bacteroidia	o__Bacteroidales	f__UBA932	g__RUG11257	s__RUG11257 sp017527625	0	0	0	0	0	0	149.027	0	160.852	0	172.579	114.244
RGMC.676	d__Bacteria	p__Bacteroidota	c__Bacteroidia	o__Bacteroidales	f__UBA932	g__RUG11257	s__RUG11257 sp017527625	0	0	0	0	0	0	0	0	0	0	0	0
RGMC.29229	d__Bacteria	p__Bacteroidota	c__Bacteroidia	o__Bacteroidales	f__VadinHA17	g__DUOU01	s__	154.845	0	0	129.181	156.163	118.332	0	0	0	141.011	0	0
RGMC.38426	d__Bacteria	p__Bacteroidota	c__Bacteroidia	o__Bacteroidales	f__WCHB1-69	g__F23-D06	s__	1162.37	1183.37	1307	1259.41	1237.3	1287.74	3125.48	1587.61	3865.1	1983.79	4244.86	2439.59
RGMC.16926	d__Bacteria	p__Bacteroidota	c__Bacteroidia	o__Bacteroidales	f__WCHB1-69	g__F23-D06	s__F23-D06 sp017395245	1317.84	1174.45	1200.73	1450.38	1248.87	1426.35	254.806	1229.25	0	651.125	0	332.766
RGMC.12272	d__Bacteria	p__Bacteroidota	c__Bacteroidia	o__Bacteroidales	f__WCHB1-69	g__F23-D06	s__F23-D06 sp017540505	1384.56	927.777	1040.04	1023.89	1062.61	1006.88	419.298	1048.99	206.665	860.363	154.342	586.173
RGMC.29724	d__Bacteria	p__Bacteroidota	c__Bacteroidia	o__Bacteroidales	f__WCHB1-69	g__F23-D06	s__F23-D06 sp017540505	839.921	590.07	650.12	649.522	663.554	636.407	273.226	657.794	134.17	541.13	97.3127	375.308
RGMC.39150	d__Bacteria	p__Bacteroidota	c__Bacteroidia	o__Bacteroidales	f__WCHB1-69	g__F23-D06	s__F23-D06 sp017540505	766.697	521.285	585.542	572.889	553.745	554.678	252.081	575.666	133.805	456.154	101.425	337.423
RGMC.9419	d__Bacteria	p__Bacteroidota	c__Bacteroidia	o__Bacteroidales	f__WCHB1-69	g__JAFTCA01	s__	363.355	241.729	270.707	264.681	275.266	271.576	153.133	162.262	112.179	186.88	0	166.43
RGMC.13006	d__Bacteria	p__Bacteroidota	c__Bacteroidia	o__Bacteroidales	f__WCHB1-69	g__JAFTCA01	s__JAFTCA01 sp017454945	0	0	0	0	0	166.303	0	0	0	0	0	0
RGMC.8709	d__Bacteria	p__Bacteroidota	c__Bacteroidia	o__Bacteroidales	f__WCHB1-69	g__RUG11690	s__RUG11690 sp902771655	1249.74	847.629	863.12	1464.09	1698.47	1167.5	3709.71	2123.44	4827.36	4058.13	6329.72	2872.3
RGMC.40695	d__Bacteria	p__Bacteroidota	c__Bacteroidia	o__Bacteroidales	f__WCHB1-69	g__RUG11690	s__RUG11690 sp902771655	1386.71	861.03	950.585	1297.21	1284.26	1198.87	3693.48	2016.25	4259.78	3107.61	4396.13	3258.52
RGMC.12775	d__Bacteria	p__Bacteroidota	c__Bacteroidia	o__Bacteroidales	f__WCHB1-69	g__RUG11690	s__RUG11690 sp902771655	1132.55	739.612	799.143	1189.29	1183.96	1051.12	3076.79	1709.68	3760.48	2660.22	3959.25	2459.75
RGMC.15350	d__Bacteria	p__Bacteroidota	c__Bacteroidia	o__Bacteroidales	f__WCHB1-69	g__RUG11690	s__RUG11690 sp902771655	886.18	566.816	595.479	896.186	909.164	804.497	2459.36	1371.08	2953.31	2152.83	3139.53	1968.49
RGMC.8848	d__Bacteria	p__Bacteroidota	c__Bacteroidia	o__Bacteroidales	f__WCHB1-69	g__RUG11690	s__RUG11690 sp902771655	659.164	428.273	451.138	649.712	654.845	586.438	1879.79	1008.41	2165.87	1527.47	2196.32	1481.21
RGMC.18778	d__Bacteria	p__Bacteroidota	c__Bacteroidia	o__Bacteroidales	f__WCHB1-69	g__RUG11690	s__RUG11690 sp902771655	632.443	439.044	450.928	719.673	853.8	532.317	1544.33	880.106	1822.31	1384.55	2174.39	1358.68
RGMC.18846	d__Bacteria	p__Bacteroidota	c__Bacteroidia	o__Bacteroidales	f__WCHB1-69	g__RUG11690	s__RUG11690 sp902771655	602.805	379.063	402.36	572.198	548.797	525.332	1595.52	863.412	1800.17	1295.68	1821.93	1297.07
RGMC.23804	d__Bacteria	p__Bacteroidota	c__Bacteroidia	o__Bacteroidales	f__WCHB1-69	g__UBA1195	s__	456.414	328.868	354.215	385.584	407.105	362.024	0	0	0	0	0	0
RGMC.27218	d__Bacteria	p__Bacteroidota	c__Bacteroidia	o__Bacteroidales	f__WCHB1-69	g__UBA1195	s__	400.523	295.346	319.477	330.405	343.175	324.918	0	0	0	0	0	0
RGMC.27613	d__Bacteria	p__Bacteroidota	c__Bacteroidia	o__Bacteroidales	f__WCHB1-69	g__UBA1195	s__	364.335	270.505	288.757	306.625	314.352	289.261	0	0	0	0	0	0
RGMC.27011	d__Bacteria	p__Bacteroidota	c__Bacteroidia	o__Bacteroidales	f__WCHB1-69	g__UBA1195	s__	322.992	229.929	244.837	249.791	269.099	244.703	0	0	0	0	0	0
RGMC.12412	d__Bacteria	p__Bacteroidota	c__Bacteroidia	o__Bacteroidales	f__WCHB1-69	g__UBA1195	s__UBA1195 sp902774175	203.178	164.44	171.818	189.701	202.135	166.68	0	0	0	0	0	0
RGMC.39440	d__Bacteria	p__Bacteroidota	c__Bacteroidia	o__Bacteroidales	f__WCHB1-69	g__UBA1756	s__	258.439	226.514	257.786	376.191	283.553	347.437	0	172.806	0	0	0	0
RGMC.40768	d__Bacteria	p__Bacteroidota	c__Bacteroidia	o__Bacteroidales	f__WCHB1-69	g__UBA1756	s__	213.662	216.928	239.4	280.48	287.841	262.981	0	284.461	0	0	0	0
RGMC.10685	d__Bacteria	p__Bacteroidota	c__Bacteroidia	o__Bacteroidales	f__WCHB1-69	g__UBA1756	s__	0	0	0	0	0	110.128	0	0	0	0	0	0
RGMC.34	d__Bacteria	p__Bacteroidota	c__Bacteroidia	o__Bacteroidales	f__WCHB1-69	g__UBA1756	s__UBA1756 sp016285085	0	163.484	0	271.596	214.494	250.389	0	0	0	0	0	0
RGMC.20741	d__Bacteria	p__Bacteroidota	c__Bacteroidia	o__Bacteroidales	f__WCHB1-69	g__UBA1756	s__UBA1756 sp900321845	417.362	374.429	380.328	430.861	478.596	395.988	238.984	566.814	0	669.067	0	392.31
RGMC.18901	d__Bacteria	p__Bacteroidota	c__Bacteroidia	o__Bacteroidales	f__WCHB1-69	g__UBA1756	s__UBA1756 sp900321845	388.621	351.424	364.672	388.124	400.415	375.952	242.222	540.986	0	590.941	0	388.2
RGMC.4244	d__Bacteria	p__Bacteroidota	c__Bacteroidia	o__Bacteroidales	f__WCHB1-69	g__UBA1756	s__UBA1756 sp900321845	381.451	326.205	359.609	353.729	360.36	362.606	233.766	507.188	0	506.49	0	379.7
RGMC.29257	d__Bacteria	p__Bacteroidota	c__Bacteroidia	o__Bacteroidales	f__WCHB1-69	g__UBA1756	s__UBA1756 sp900321845	372.224	311.157	359.399	339.643	335.865	362.042	217.825	493.316	0	483.92	0	366.94
RGMC.12629	d__Bacteria	p__Bacteroidota	c__Bacteroidia	o__Bacteroidales	f__WCHB1-69	g__UBA1756	s__UBA1756 sp900321845	323.681	290.314	314.586	314.673	316.212	315.303	172.563	391.903	0	361.038	0	294.907
RGMC.22134	d__Bacteria	p__Bacteroidota	c__Bacteroidia	o__Bacteroidales	f__WCHB1-69	g__UBA1756	s__UBA1756 sp900321845	256.356	230.872	242.27	253.103	251.587	245.548	161.148	359.258	0	359.72	0	261.039
RGMC.12249	d__Bacteria	p__Bacteroidota	c__Kapaibacteriia	o__Kapaibacteriales	f__UBA2268	g__JAAYTD01	s__JAAYTD01 sp017428585	322.273	250.283	308.2	442.735	576.078	377.005	1727.64	1065.75	2286.17	2669.62	2981.11	1530.66
RGMC.14734	d__Bacteria	p__Bacteroidota	c__Kapaibacteriia	o__Kapaibacteriales	f__UBA2268	g__JAAYTD01	s__JAAYTD01 sp017428585	0	104.421	114.312	188.544	255.608	146.599	656.079	430.996	893.679	1119.59	1220.5	568.595
RGMC.37639	d__Bacteria	p__Bacteroidota	c__Kapaibacteriia	o__Kapaibacteriales	f__UBA2268	g__JAAYTD01	s__JAAYTD01 sp017428585	0	0	0	119.999	168.287	105.893	488.491	303.596	655.122	771.526	865.9	430.092
RGMC.27398	d__Bacteria	p__Bacteroidota	c__Kapaibacteriia	o__Kapaibacteriales	f__UBA2268	g__JAAYTD01	s__JAAYTD01 sp017428585	0	0	0	0	0	0	366.78	231.733	507.921	562.715	642.334	324.015
RGMC.12048	d__Bacteria	p__Chloroflexota	c__Anaerolineae	o__Anaerolineales	f__Anaerolineaceae	g__Flexilinea	s__	916.56	875.22	918.578	656.008	686.852	698.154	457.337	527.851	456.234	399.355	382.597	463.887
RGMC.20164	d__Bacteria	p__Chloroflexota	c__Anaerolineae	o__Anaerolineales	f__Anaerolineaceae	g__Flexilinea	s__Flexilinea sp902786265	642.181	785.248	813.872	826.23	1185.3	600.857	376.399	443.476	414.302	433.866	556.018	389.8
RGMC.29304	d__Bacteria	p__Chloroflexota	c__Dehalococcoidia	o__Dehalococcoidales	f__UBA1222	g__UBA1222	s__UBA1222 sp002309415	0	0	0	262.194	299.869	204.899	160.383	187.103	130.831	341.886	162.238	179.864
RGMC.355	d__Bacteria	p__Chloroflexota	c__Dehalococcoidia	o__Dehalococcoidales	f__UBA1222	g__UBA1222	s__UBA1222 sp016284035	0	0	0	207.349	248.28	179.893	155.691	190.488	132.571	314.1	162.178	172.346
RGMC.15512	d__Bacteria	p__Chloroflexota	c__Dehalococcoidia	o__Dehalococcoidales	f__UBA1222	g__UBA1222	s__UBA1222 sp016284035	0	0	0	178.423	197.733	156.091	133.222	152.758	104.872	238.69	120.353	131.118
RGMC.87	d__Bacteria	p__Chloroflexota	c__Dehalococcoidia	o__Dehalococcoidales	f__UBA1222	g__UBA1222	s__UBA1222 sp016286345	384.889	260.996	268.13	340.47	408.415	299.076	190.27	240.364	151.134	395.171	204.755	218.113
RGMC.10975	d__Bacteria	p__Desulfobacterota	c__Desulfobulbia	o__Desulfobulbales	f__Desulfobulbaceae	g__Desulfobulbus	s__	0	0	0	0	0	0	0	0	0	0	0	0
RGMC.219	d__Bacteria	p__Desulfobacterota	c__Desulfovibrionia	o__Desulfovibrionales	f__Desulfovibrionaceae	g__Desulfovibrio	s__	366.151	196.843	0	178.857	221.034	164.311	559.765	306.313	607.784	445.451	676.248	273.31
RGMC.17787	d__Bacteria	p__Desulfobacterota	c__Desulfovibrionia	o__Desulfovibrionales	f__Desulfovibrionaceae	g__Desulfovibrio	s__Desulfovibrio desulfuricans_D	599.16	580.745	505.553	595.353	662.627	472.734	642.571	588.78	627.495	758.611	760.061	646.148
RGMC.10771	d__Bacteria	p__Desulfobacterota	c__Desulfovibrionia	o__Desulfovibrionales	f__Desulfovibrionaceae	g__Desulfovibrio	s__Desulfovibrio desulfuricans_D	0	680.472	0	612.144	544.462	576.887	811.312	696.897	727.405	772.988	674.125	648.767
RGMC.16477	d__Bacteria	p__Desulfobacterota	c__Desulfovibrionia	o__Desulfovibrionales	f__Desulfovibrionaceae	g__Desulfovibrio	s__Desulfovibrio desulfuricans_D	0	229.922	175.782	215.017	207.783	184.948	258.38	247.495	252.782	272.4	294.161	231.306
RGMC.10824	d__Bacteria	p__Desulfobacterota	c__Desulfovibrionia	o__Desulfovibrionales	f__Desulfovibrionaceae	g__Desulfovibrio	s__Desulfovibrio sp002369295	739.231	553.961	472.05	431.593	467.58	464.093	551.197	505.213	536.705	592.079	591.384	502.646
RGMC.27985	d__Bacteria	p__Desulfobacterota	c__Desulfovibrionia	o__Desulfovibrionales	f__Desulfovibrionaceae	g__Desulfovibrio	s__Desulfovibrio sp002369295	771.96	570.917	493.864	437.297	482.136	473.049	532.674	500.398	483.07	573.469	500.239	515.995
RGMC.37622	d__Bacteria	p__Desulfobacterota	c__Desulfovibrionia	o__Desulfovibrionales	f__Desulfovibrionaceae	g__Desulfovibrio	s__Desulfovibrio sp002369295	0	0	0	0	0	0	0	0	364.027	427.85	363.06	0
RGMC.37285	d__Bacteria	p__Desulfobacterota	c__Desulfovibrionia	o__Desulfovibrionales	f__Desulfovibrionaceae	g__Desulfovibrio	s__Desulfovibrio sp002369295	0	0	0	0	0	0	0	0	273.594	255.029	410.243	0
RGMC.37413	d__Bacteria	p__Desulfobacterota	c__Desulfovibrionia	o__Desulfovibrionales	f__Desulfovibrionaceae	g__Desulfovibrio	s__Desulfovibrio sp002369295	0	0	0	0	0	0	0	0	194.548	216.252	254.317	0
RGMC.15069	d__Bacteria	p__Desulfobacterota	c__Desulfovibrionia	o__Desulfovibrionales	f__Desulfovibrionaceae	g__Desulfovibrio	s__Desulfovibrio sp016284885	1794.08	1505.68	1585.82	1220.78	1315.31	1486.6	1001.64	1184.65	896.685	1136.96	924.133	1061.96
RGMC.26	d__Bacteria	p__Desulfobacterota	c__Desulfovibrionia	o__Desulfovibrionales	f__Desulfovibrionaceae	g__Desulfovibrio	s__Desulfovibrio sp016284885	869.831	1101.72	980.833	1005.99	1231.39	797.909	585.173	750.403	566.862	872.92	721.878	669.925
RGMC.129	d__Bacteria	p__Desulfobacterota	c__Desulfovibrionia	o__Desulfovibrionales	f__Desulfovibrionaceae	g__Desulfovibrio	s__Desulfovibrio sp016284885	800.715	936.488	805.92	861.014	1046.93	752.73	526.788	689.274	494.013	757.73	581.325	476.84
RGMC.629	d__Bacteria	p__Desulfobacterota	c__Desulfovibrionia	o__Desulfovibrionales	f__Desulfovibrionaceae	g__Desulfovibrio	s__Desulfovibrio sp016284885	656.025	737.997	625.454	666.8	803.278	588.92	406.167	536.022	369.407	583	424.192	366.356
RGMC.15205	d__Bacteria	p__Desulfobacterota	c__Desulfovibrionia	o__Desulfovibrionales	f__Desulfovibrionaceae	g__Desulfovibrio	s__Desulfovibrio sp017528345	1438.21	1085.19	1130.5	1086.07	1090.74	1152.09	2086.07	1352.54	1821.64	1933.58	1592.56	1581.53
RGMC.16038	d__Bacteria	p__Desulfobacterota	c__Desulfovibrionia	o__Desulfovibrionales	f__Desulfovibrionaceae	g__Mailhella	s__Mailhella sp902783285	0	144.54	0	0	0	0	0	0	0	0	0	0
RGMC.39944	d__Bacteria	p__Desulfobacterota	c__Desulfuromonadia	o__Desulfuromonadales	f__JAAYDE01	g__RGIG7977	s__	353.874	296.099	304.227	267.267	312.45	251.911	0	0	0	242.917	0	251.394
RGMC.40589	d__Bacteria	p__Desulfobacterota	c__Desulfuromonadia	o__Desulfuromonadales	f__JAAYDE01	g__RGIG7977	s__	0	0	0	0	0	0	0	0	0	0	0	355.577
RGMC.12414	d__Bacteria	p__Desulfobacterota	c__Desulfuromonadia	o__Desulfuromonadales	f__JAAYDE01	g__RGIG7977	s__RGIG7977 sp017417085	532.379	479.877	532.637	349.227	396.721	391.764	358.33	362.13	245.73	367.663	189.7	454.331
RGMC.600	d__Bacteria	p__Desulfobacterota	c__Desulfuromonadia	o__Desulfuromonadales	f__JAAYDE01	g__RGIG7977	s__RGIG7977 sp017417085	437.223	409.114	405.481	0	427.238	351.238	318.328	347.215	235.867	377.468	0	391.949
RGMC.12831	d__Bacteria	p__Desulfobacterota	c__Desulfuromonadia	o__Desulfuromonadales	f__JAAYDE01	g__RGIG7977	s__RGIG7977 sp017417085	368.189	288.037	327.706	213.421	253.685	211.833	226.909	218.654	160.118	248.208	143.28	306.834
RGMC.23225	d__Bacteria	p__Elusimicrobiota	c__Elusimicrobia	o__Elusimicrobiales	f__UBA9959	g__CACZRG01	s__CACZRG01 sp024681855	2766.43	601.667	709.506	1105.81	904.894	651.738	0	0	0	0	0	0
RGMC.732	d__Bacteria	p__Elusimicrobiota	c__Elusimicrobia	o__Elusimicrobiales	f__UBA9959	g__CACZRG01	s__CACZRG01 sp024681855	2014.77	301.678	349.822	692.724	505.351	413.267	0	0	0	0	0	0
RGMC.40138	d__Bacteria	p__Elusimicrobiota	c__Elusimicrobia	o__Elusimicrobiales	f__UBA9959	g__CACZRG01	s__CACZRG01 sp024681855	1814.17	268.757	326.341	622.088	457.457	379.529	0	0	0	0	0	0
RGMC.40710	d__Bacteria	p__Elusimicrobiota	c__Endomicrobiia	o__Endomicrobiales	f__Endomicrobiaceae	g__RUG658	s__	367.039	0	0	247.451	220.111	227.362	0	0	0	0	0	0
RGMC.25806	d__Bacteria	p__Eremiobacterota	c__CADAWZ01	o__CADAWZ01	f__CADAWZ01	g__JAKSUM01	s__	1607.53	1571.78	1522.22	1271.56	1482.38	1062.49	136.044	370.409	0	222.456	0	214.141
RGMC.39917	d__Bacteria	p__Eremiobacterota	c__CADAWZ01	o__CADAWZ01	f__CADAWZ01	g__JAKSUM01	s__	1353.2	1365.52	1286.97	1109.93	1336.02	902.741	0	304.275	0	182.091	0	175.769
RGMC.420	d__Bacteria	p__Eremiobacterota	c__Xenobia	o__Xenobiales	f__Xenobiaceae	g__	s__	513.881	953.447	1124.69	853.903	1036.88	869.69	0	228.025	0	0	0	0
RGMC.38089	d__Bacteria	p__Fibrobacterota	c__Fibrobacteria	o__Fibrobacterales	f__Fibrobacteraceae	g__Fibrobacter	s__	0	227.393	239.069	349.597	369.845	320.893	849.69	822.824	891.7	890.526	810.453	597.98
RGMC.38834	d__Bacteria	p__Fibrobacterota	c__Fibrobacteria	o__Fibrobacterales	f__Fibrobacteraceae	g__Fibrobacter	s__	0	232.621	238.146	368.78	383.495	329.924	815.372	856.789	863.421	918.372	792.891	592.877
RGMC.1456	d__Bacteria	p__Fibrobacterota	c__Fibrobacteria	o__Fibrobacterales	f__Fibrobacteraceae	g__Fibrobacter	s__	125.541	0	0	146.447	159.223	120.306	150.405	158.458	140.608	169.092	166.563	122.167
RGMC.40437	d__Bacteria	p__Fibrobacterota	c__Fibrobacteria	o__Fibrobacterales	f__Fibrobacteraceae	g__Fibrobacter	s__	0	0	0	156.031	160.372	137.642	171.256	170.375	0	181.647	166.027	0
RGMC.38941	d__Bacteria	p__Fibrobacterota	c__Fibrobacteria	o__Fibrobacterales	f__Fibrobacteraceae	g__Fibrobacter	s__	0	0	0	0	0	0	0	0	0	0	0	0
RGMC.38329	d__Bacteria	p__Fibrobacterota	c__Fibrobacteria	o__Fibrobacterales	f__Fibrobacteraceae	g__Fibrobacter	s__Fibrobacter sp001603905	0	0	0	0	177.49	0	0	0	0	0	0	0
RGMC.1464	d__Bacteria	p__Fibrobacterota	c__Fibrobacteria	o__Fibrobacterales	f__Fibrobacteraceae	g__Fibrobacter	s__Fibrobacter sp002210345	0	0	0	0	0	0	1978.62	1265.93	1921.93	1270.15	1563.59	1474.3
RGMC.25893	d__Bacteria	p__Fibrobacterota	c__Fibrobacteria	o__Fibrobacterales	f__Fibrobacteraceae	g__Fibrobacter	s__Fibrobacter sp002210345	0	128.284	0	181.968	188.112	161.508	615.808	570.894	844.453	695.601	851.735	347.25
RGMC.19657	d__Bacteria	p__Fibrobacterota	c__Fibrobacteria	o__Fibrobacterales	f__Fibrobacteraceae	g__Fibrobacter	s__Fibrobacter sp002210345	0	0	0	0	0	0	654.367	561.206	799.123	604.826	702.535	383.111
RGMC.20200	d__Bacteria	p__Fibrobacterota	c__Fibrobacteria	o__Fibrobacterales	f__Fibrobacteraceae	g__Fibrobacter	s__Fibrobacter sp002210345	0	0	0	0	0	0	537.41	470.447	672.766	528.248	616.948	310.586
RGMC.30313	d__Bacteria	p__Fibrobacterota	c__Fibrobacteria	o__Fibrobacterales	f__Fibrobacteraceae	g__Fibrobacter	s__Fibrobacter sp002210345	0	0	0	0	0	0	297.314	278.09	403.352	334.231	407.491	187.431
RGMC.21254	d__Bacteria	p__Fibrobacterota	c__Fibrobacteria	o__Fibrobacterales	f__Fibrobacteraceae	g__Fibrobacter	s__Fibrobacter sp002210345	0	0	0	0	0	0	288.684	272.932	387.688	322.083	396.826	172.106
RGMC.6174	d__Bacteria	p__Fibrobacterota	c__Fibrobacteria	o__Fibrobacterales	f__Fibrobacteraceae	g__Fibrobacter	s__Fibrobacter sp017520105	286.446	225.042	229.421	348.571	364.235	326.034	592.864	513.446	704.645	520.423	671.479	432.205
RGMC.2697	d__Bacteria	p__Fibrobacterota	c__Fibrobacteria	o__Fibrobacterales	f__Fibrobacteraceae	g__Fibrobacter	s__Fibrobacter sp017520105	298.974	230.889	234.539	378.515	407.953	335.25	534.654	477.894	633.789	504.462	666.744	403.739
RGMC.39721	d__Bacteria	p__Fibrobacterota	c__Fibrobacteria	o__Fibrobacterales	f__Fibrobacteraceae	g__Fibrobacter	s__Fibrobacter sp017530965	490.465	654.283	654.113	1024.54	1071.16	928.88	2249.39	2361.54	2368.75	2623.09	2244.16	1652.7
RGMC.15152	d__Bacteria	p__Fibrobacterota	c__Fibrobacteria	o__Fibrobacterales	f__Fibrobacteraceae	g__Fibrobacter	s__Fibrobacter sp017530965	427.274	559.143	564.134	922.352	929.145	825.608	2046.64	2084.62	2143.26	2281.05	1987.52	1449.83
RGMC.30299	d__Bacteria	p__Fibrobacterota	c__Fibrobacteria	o__Fibrobacterales	f__Fibrobacteraceae	g__Fibrobacter	s__Fibrobacter sp017530965	413.237	545.619	545.993	874.024	924.176	780.474	1935.85	2043.31	2038.67	2257.85	1927.06	1389.05
RGMC.11889	d__Bacteria	p__Fibrobacterota	c__Fibrobacteria	o__Fibrobacterales	f__Fibrobacteraceae	g__Fibrobacter	s__Fibrobacter sp017965445	0	0	0	326.082	321.942	308.668	623.66	514.867	745.778	489.05	677.66	0
RGMC.2846	d__Bacteria	p__Fibrobacterota	c__Fibrobacteria	o__Fibrobacterales	f__Fibrobacteraceae	g__Fibrobacter	s__Fibrobacter sp946186895	218.214	113.649	139.079	232.014	252.544	178.867	168.353	140.783	117.356	157.081	137.364	212.949
RGMC.9566	d__Bacteria	p__Fibrobacterota	c__Fibrobacteria	o__Fibrobacterales	f__Fibrobacteraceae	g__Fibrobacter	s__Fibrobacter sp946405515	532.898	294	336.58	455.919	466.987	349.076	292.299	353.796	267.241	497.2	345.961	414.017
RGMC.2337	d__Bacteria	p__Fibrobacterota	c__Fibrobacteria	o__Fibrobacterales	f__Fibrobacteraceae	g__Fibrobacter	s__Fibrobacter sp947166265	0	0	0	0	163.662	0	0	0	0	0	0	0
RGMC.19553	d__Bacteria	p__Fibrobacterota	c__Fibrobacteria	o__Fibrobacterales	f__Fibrobacteraceae	g__Fibrobacter	s__Fibrobacter succinogenes_F	230.49	212.165	0	248.827	252.56	231.731	429.15	474.457	486.414	539.345	532.526	311.071
RGMC.19251	d__Bacteria	p__Fibrobacterota	c__Fibrobacteria	o__Fibrobacterales	f__Fibrobacteraceae	g__Fibrobacter	s__Fibrobacter succinogenes_N	0	0	0	0	0	0	0	0	0	0	386.054	0
RGMC.20998	d__Bacteria	p__Fibrobacterota	c__Fibrobacteria	o__Fibrobacterales	f__Fibrobacteraceae	g__Fibrobacter	s__Fibrobacter succinogenes_P	1794.31	905.783	1050.27	1358.32	1540.18	1123.69	1086.38	1100.68	976.901	1377.24	1154.7	1222.34
RGMC.8014	d__Bacteria	p__Fibrobacterota	c__Fibrobacteria	o__Fibrobacterales	f__Fibrobacteraceae	g__Fibrobacter	s__Fibrobacter succinogenes_P	1278.57	693.717	785.95	1096.24	1413.99	824.875	790.679	827.015	738.157	1142.28	1071.41	952.149
RGMC.23524	d__Bacteria	p__Fibrobacterota	c__Fibrobacteria	o__Fibrobacterales	f__Fibrobacteraceae	g__Fibrobacter	s__Fibrobacter succinogenes_P	1313.54	652.106	766.043	948.893	1076.9	819.316	779.268	774.543	696.671	951.122	801.599	910.061
RGMC.15890	d__Bacteria	p__Fibrobacterota	c__Fibrobacteria	o__Fibrobacterales	f__Fibrobacteraceae	g__Fibrobacter	s__Fibrobacter succinogenes_P	1167.67	593.142	686.542	868.407	977.779	738.638	698.201	701.114	617.985	845.241	705.902	815.39
RGMC.40745	d__Bacteria	p__Myxococcota	c__Bradymonadia	o__UBA4248	f__UBA4248	g__	s__	181.296	798.037	905.026	1066.78	1160.33	1148.98	0	557.709	0	418.251	0	166.273
RGMC.1780	d__Bacteria	p__Myxococcota	c__Bradymonadia	o__UBA7976	f__UBA1532	g__UBA1238	s__UBA1238 sp002309015	898.248	689.44	792.534	999.523	1006.73	1018.79	763.822	1145.53	429.232	1051.08	304.259	787.577
RGMC.12042	d__Bacteria	p__Patescibacteria	c__Saccharimonadia	o__Saccharimonadales	f__Nanosyncoccaceae	g__Nanosyncoccus	s__	0	0	0	0	0	0	0	0	0	0	0	0
RGMC.39784	d__Bacteria	p__Planctomycetota	c__Planctomycetia	o__Pirellulales	f__Thermoguttaceae	g__RGIG3701	s__	1099.04	1532.08	1710.86	1629.34	1657.37	1640.68	0	899.947	0	553.23	0	181.307
RGMC.37288	d__Bacteria	p__Planctomycetota	c__Planctomycetia	o__Pirellulales	f__Thermoguttaceae	g__RGIG3701	s__	293.665	514.274	523.034	552.391	589.359	528.048	0	345.305	0	205.144	0	0
RGMC.12681	d__Bacteria	p__Planctomycetota	c__Planctomycetia	o__Pirellulales	f__Thermoguttaceae	g__RGIG3701	s__RGIG3701 sp017447865	1574.19	2287.92	2456.73	2467.12	2577.55	2426.36	0	1300.25	0	791.35	0	234.366
RGMC.12688	d__Bacteria	p__Planctomycetota	c__Planctomycetia	o__Pirellulales	f__Thermoguttaceae	g__RUG11551	s__RUG11551 sp017447745	0	0	0	0	0	0	388.467	0	175.323	390.114	0	349.895
RGMC.11452	d__Bacteria	p__Planctomycetota	c__Planctomycetia	o__Pirellulales	f__Thermoguttaceae	g__RUG369	s__	358.133	191.341	204.567	201.086	196.013	169.703	325.921	0	320.034	222.67	296.682	290.371
RGMC.2952	d__Bacteria	p__Planctomycetota	c__Planctomycetia	o__Pirellulales	f__Thermoguttaceae	g__RUG369	s__RUG369 sp900317365	0	0	0	0	0	0	0	0	0	0	0	0
RGMC.21493	d__Bacteria	p__Planctomycetota	c__Planctomycetia	o__Pirellulales	f__Thermoguttaceae	g__RUG369	s__RUG369 sp902786505	0	0	0	0	0	0	0	0	0	0	0	0
RGMC.14811	d__Bacteria	p__Planctomycetota	c__Planctomycetia	o__Pirellulales	f__Thermoguttaceae	g__RUG369	s__RUG369 sp902786505	0	0	0	0	0	0	0	0	0	0	0	0
RGMC.22369	d__Bacteria	p__Planctomycetota	c__Planctomycetia	o__Pirellulales	f__Thermoguttaceae	g__RUG369	s__RUG369 sp902786505	0	0	0	0	0	0	0	0	0	0	0	0
RGMC.14303	d__Bacteria	p__Planctomycetota	c__Planctomycetia	o__Pirellulales	f__Thermoguttaceae	g__RUG369	s__RUG369 sp902786505	0	0	0	0	0	0	0	0	0	0	0	0
RGMC.12989	d__Bacteria	p__Planctomycetota	c__Planctomycetia	o__Pirellulales	f__Thermoguttaceae	g__RUG369	s__RUG369 sp902803085	248.691	180.049	168.3	192.255	195.888	151.27	262.304	193.258	259.245	240.903	276.999	207.013
RGMC.40486	d__Bacteria	p__Planctomycetota	c__Planctomycetia	o__Pirellulales	f__Thermoguttaceae	g__RUG369	s__RUG369 sp902803085	212.168	156.441	145.044	169.887	180.74	132.649	233.582	168.107	230.001	217.313	248.672	178.409
RGMC.21667	d__Bacteria	p__Planctomycetota	c__Planctomycetia	o__Pirellulales	f__Thermoguttaceae	g__RUG369	s__RUG369 sp902803085	197.838	142.451	0	152.383	160.171	114.59	202.815	0	201.1	192.179	217.45	160.085
RGMC.28222	d__Bacteria	p__Planctomycetota	c__Planctomycetia	o__Pirellulales	f__Thermoguttaceae	g__RUG369	s__RUG369 sp946541595	0	0	0	0	0	0	0	0	125.466	0	154.162	0
RGMC.28340	d__Bacteria	p__Planctomycetota	c__Planctomycetia	o__Pirellulales	f__Thermoguttaceae	g__RUG369	s__RUG369 sp946541595	0	0	0	0	0	0	0	0	127.835	0	132.295	0
RGMC.16123	d__Bacteria	p__Planctomycetota	c__Planctomycetia	o__Pirellulales	f__Thermoguttaceae	g__RUG695	s__RUG695 sp902766935	417.57	233.532	226.346	238.089	249.142	200.02	0	177.464	0	180.641	0	0
RGMC.39172	d__Bacteria	p__Planctomycetota	c__Planctomycetia	o__Pirellulales	f__Thermoguttaceae	g__RUG695	s__RUG695 sp902766935	294.67	179.322	179.581	182.779	174.772	151.712	0	0	0	126.062	0	0
RGMC.27037	d__Bacteria	p__Planctomycetota	c__Planctomycetia	o__Pirellulales	f__Thermoguttaceae	g__RUG695	s__RUG695 sp902766935	377.297	201.672	0	199.124	183.309	172.271	0	0	0	0	0	0
RGMC.552	d__Bacteria	p__Planctomycetota	c__Planctomycetia	o__Pirellulales	f__Thermoguttaceae	g__RUG695	s__RUG695 sp902766935	192.876	123.703	115.741	126.151	124.11	103.018	0	110.14	0	104.31	0	0
RGMC.5010	d__Bacteria	p__Planctomycetota	c__Planctomycetia	o__Pirellulales	f__Thermoguttaceae	g__RUG695	s__RUG695 sp902766935	170.265	101.174	0	107.166	0	88.6101	0	0	0	0	0	0
RGMC.12992	d__Bacteria	p__Pseudomonadota	c__Alphaproteobacteria	o__Rhizobiales	f__Rhizobiaceae	g__Phyllobacterium	s__Phyllobacterium calauticae	0	60.802	0	86.4878	276.037	102.424	83.8816	103.385	86.8066	154.897	149.233	151.083
RGMC.40161	d__Bacteria	p__Pseudomonadota	c__Alphaproteobacteria	o__Rs-D84	f__Rs-D84	g__Enterousia	s__	0	0	0	0	0	92.0561	0	0	0	0	0	0
RGMC.3008	d__Bacteria	p__Pseudomonadota	c__Alphaproteobacteria	o__Rs-D84	f__Rs-D84	g__Enterousia	s__Enterousia sp002373935	0	0	0	0	0	0	159.177	0	362.889	0	282.275	0
RGMC.23587	d__Bacteria	p__Pseudomonadota	c__Alphaproteobacteria	o__UBA3830	f__UBA3830	g__CADBNZ01	s__	224.683	943.435	723.74	1044.64	642.979	995.399	1306.48	1160.49	1124.11	1193.72	633.129	1137.71
RGMC.21068	d__Bacteria	p__Pseudomonadota	c__Alphaproteobacteria	o__UBA3830	f__UBA3830	g__CADBNZ01	s__CADBNZ01 sp902796155	0	246.466	193.149	310.061	228.342	274.733	329.221	314.711	303.905	344.351	195.698	308.22
RGMC.11438	d__Bacteria	p__Pseudomonadota	c__Alphaproteobacteria	o__UBA3830	f__UBA3830	g__UBA3830	s__UBA3830 sp017416635	0	734.598	481.12	751.855	517.14	754.372	1422.73	1863.77	1554.51	1756.43	1117.84	996.72
RGMC.40041	d__Bacteria	p__Pseudomonadota	c__Gammaproteobacteria	o__Burkholderiales	f__Burkholderiaceae	g__Oxalobacter	s__Oxalobacter sp016291665	0	0	0	0	0	0	485.879	0	457.252	0	0	0
RGMC.3354	d__Bacteria	p__Pseudomonadota	c__Gammaproteobacteria	o__Enterobacterales	f__Enterobacteriaceae	g__Escherichia	s__Escherichia coli	254.389	181.128	198.24	207.082	959.064	285.741	258.02	272.973	569.476	422.325	466.509	274.199
RGMC.35753	d__Bacteria	p__Pseudomonadota	c__Gammaproteobacteria	o__Enterobacterales	f__Enterobacteriaceae	g__Escherichia	s__Escherichia coli	0	0	0	0	185.861	0	0	0	142.867	92.5347	93.6901	0
RGMC.7684	d__Bacteria	p__Pseudomonadota	c__Gammaproteobacteria	o__Enterobacterales	f__Enterobacteriaceae	g__Escherichia	s__Escherichia coli	0	0	0	0	503.508	0	0	0	0	0	0	0
RGMC.40792	d__Bacteria	p__Pseudomonadota	c__Gammaproteobacteria	o__Enterobacterales	f__Enterobacteriaceae	g__Escherichia	s__Escherichia coli	0	0	0	0	132.787	0	0	0	0	0	0	0
RGMC.36690	d__Bacteria	p__Pseudomonadota	c__Gammaproteobacteria	o__Enterobacterales	f__Enterobacteriaceae	g__Escherichia	s__Escherichia coli	0	0	0	0	78.7282	0	0	0	0	0	0	0
RGMC.19872	d__Bacteria	p__Pseudomonadota	c__Gammaproteobacteria	o__Enterobacterales	f__Succinivibrionaceae	g__Ruminobacter	s__Ruminobacter amylophilus	0	0	0	2203.58	2592.99	2410.71	1983.07	1798.51	1802.13	2097.22	1660.56	2426.45
RGMC.3818	d__Bacteria	p__Pseudomonadota	c__Gammaproteobacteria	o__Enterobacterales	f__Succinivibrionaceae	g__Ruminobacter	s__Ruminobacter amylophilus	0	0	0	0	0	0	177.041	160.64	129.875	203.561	164.084	0
RGMC.19882	d__Bacteria	p__Pseudomonadota	c__Gammaproteobacteria	o__Enterobacterales	f__Succinivibrionaceae	g__Ruminobacter	s__Ruminobacter amylophilus	0	0	0	0	0	0	0	0	0	0	0	0
RGMC.5830	d__Bacteria	p__Pseudomonadota	c__Gammaproteobacteria	o__Enterobacterales	f__Succinivibrionaceae	g__Ruminobacter	s__Ruminobacter amylophilus	0	0	0	0	0	0	0	0	0	0	0	0
RGMC.37691	d__Bacteria	p__Pseudomonadota	c__Gammaproteobacteria	o__Enterobacterales	f__Succinivibrionaceae	g__Ruminobacter	s__Ruminobacter amylophilus	0	0	0	0	0	0	0	0	0	0	0	0
RGMC.5433	d__Bacteria	p__Pseudomonadota	c__Gammaproteobacteria	o__Enterobacterales	f__Succinivibrionaceae	g__Ruminobacter	s__Ruminobacter sp002309455	0	0	0	0	0	0	544.053	415.824	425.772	583.804	377.945	0
RGMC.34401	d__Bacteria	p__Pseudomonadota	c__Gammaproteobacteria	o__Enterobacterales	f__Succinivibrionaceae	g__Ruminobacter	s__Ruminobacter sp002309455	0	0	0	0	0	0	316.367	0	0	0	0	0
RGMC.11082	d__Bacteria	p__Pseudomonadota	c__Gammaproteobacteria	o__Enterobacterales	f__Succinivibrionaceae	g__Ruminobacter	s__Ruminobacter sp002309455	0	0	0	0	0	0	277.46	0	0	0	0	0
RGMC.30236	d__Bacteria	p__Pseudomonadota	c__Gammaproteobacteria	o__Enterobacterales	f__Succinivibrionaceae	g__Ruminobacter	s__Ruminobacter sp002309455	0	0	0	0	0	0	0	0	0	0	0	0
RGMC.19397	d__Bacteria	p__Pseudomonadota	c__Gammaproteobacteria	o__Enterobacterales	f__Succinivibrionaceae	g__Ruminobacter	s__Ruminobacter sp002309455	0	0	0	0	0	0	0	0	0	0	0	0
RGMC.30310	d__Bacteria	p__Pseudomonadota	c__Gammaproteobacteria	o__Enterobacterales	f__Succinivibrionaceae	g__Ruminobacter	s__Ruminobacter sp002309455	0	0	0	0	0	0	0	0	0	0	0	0
RGMC.17160	d__Bacteria	p__Pseudomonadota	c__Gammaproteobacteria	o__Enterobacterales	f__Succinivibrionaceae	g__UBA2804	s__UBA2804 sp900319705	0	0	0	0	0	0	0	0	0	0	0	0
RGMC.2405	d__Bacteria	p__Pseudomonadota	c__Gammaproteobacteria	o__Pseudomonadales	f__Pseudomonadaceae	g__Pseudomonas_E	s__Pseudomonas_E fluorescens_BV	0	0	0	0	215.744	0	0	0	0	0	75.385	0
RGMC.37374	d__Bacteria	p__Pseudomonadota	c__Gammaproteobacteria	o__Xanthomonadales	f__Xanthomonadaceae	g__Xanthomonas_A	s__Xanthomonas_A translucens	1060.49	824.293	833.327	941.605	3549.35	1188.11	1023.04	926.261	903.167	1368.51	1752.7	1412.04
RGMC.23444	d__Bacteria	p__Spirochaetota	c__Spirochaetia	o__CADAEX01	f__CADAEX01	g__CADAEX01	s__	334.584	252.27	308.606	403.576	405.065	376.735	0	0	0	0	0	0
RGMC.15301	d__Bacteria	p__Spirochaetota	c__Spirochaetia	o__CADAEX01	f__CADAEX01	g__CADAEX01	s__CADAEX01 sp017535435	552.556	328.108	360.565	478.318	487.635	398.369	0	326.024	0	424.261	0	0
RGMC.40189	d__Bacteria	p__Spirochaetota	c__Spirochaetia	o__CADAEX01	f__CADAEX01	g__CADAEX01	s__CADAEX01 sp902787125	0	0	0	0	0	0	0	0	0	372.548	0	0
RGMC.12980	d__Bacteria	p__Spirochaetota	c__Spirochaetia	o__CADAEX01	f__CADAEX01	g__CADAEX01	s__CADAEX01 sp902787125	0	0	0	0	0	0	0	0	0	345.627	0	0
RGMC.38754	d__Bacteria	p__Spirochaetota	c__Spirochaetia	o__CADAEX01	f__CADAEX01	g__CADAEX01	s__CADAEX01 sp902787125	0	0	0	0	0	0	0	0	0	339.768	0	0
RGMC.39424	d__Bacteria	p__Spirochaetota	c__Spirochaetia	o__CADAEX01	f__CADAEX01	g__CADAEX01	s__CADAEX01 sp902787125	0	0	0	0	0	0	0	0	0	291.965	0	0
RGMC.15208	d__Bacteria	p__Spirochaetota	c__Spirochaetia	o__CADAEX01	f__CADAEX01	g__CADAEX01	s__CADAEX01 sp902787125	0	0	0	0	0	0	0	0	0	290.779	0	0
RGMC.40689	d__Bacteria	p__Spirochaetota	c__Spirochaetia	o__CADAEX01	f__CADAEX01	g__CADAEX01	s__CADAEX01 sp902787125	0	0	0	0	0	0	0	0	0	288.929	0	0
RGMC.39981	d__Bacteria	p__Spirochaetota	c__Spirochaetia	o__CADAEX01	f__CADAEX01	g__CADAEX01	s__CADAEX01 sp902787125	0	0	0	0	0	0	0	0	0	273.648	0	0
RGMC.27912	d__Bacteria	p__Spirochaetota	c__Spirochaetia	o__CADAEX01	f__CADAEX01	g__CADAEX01	s__CADAEX01 sp902787125	0	0	0	0	0	0	0	0	0	253.473	0	0
RGMC.27701	d__Bacteria	p__Spirochaetota	c__Spirochaetia	o__CADAEX01	f__CADAEX01	g__CADAEX01	s__CADAEX01 sp902787125	0	0	0	0	0	0	0	0	0	221.774	0	0
RGMC.20393	d__Bacteria	p__Spirochaetota	c__Spirochaetia	o__CADAEX01	f__CADAEX01	g__CADAEX01	s__CADAEX01 sp902787125	0	0	0	0	0	0	0	0	0	195.389	0	0
RGMC.18770	d__Bacteria	p__Spirochaetota	c__Spirochaetia	o__CADAEX01	f__CADAEX01	g__CADAEX01	s__CADAEX01 sp902787125	0	0	0	0	0	0	0	0	0	186.038	0	0
RGMC.38348	d__Bacteria	p__Spirochaetota	c__Spirochaetia	o__CADAEX01	f__CADAEX01	g__CADAEX01	s__CADAEX01 sp902787125	0	0	0	0	0	0	0	0	0	179.11	0	0
RGMC.20240	d__Bacteria	p__Spirochaetota	c__Spirochaetia	o__CADAEX01	f__CADAEX01	g__CADAEX01	s__CADAEX01 sp902787125	0	0	0	0	0	0	0	0	0	176.334	0	0
RGMC.38851	d__Bacteria	p__Spirochaetota	c__Spirochaetia	o__CADAEX01	f__CADAEX01	g__CADAEX01	s__CADAEX01 sp902787125	0	0	0	0	0	0	0	0	0	171.149	0	0
RGMC.20548	d__Bacteria	p__Spirochaetota	c__Spirochaetia	o__CADAEX01	f__CADAEX01	g__CADAEX01	s__CADAEX01 sp902787125	0	0	0	0	0	0	0	0	0	165.726	0	0
RGMC.38509	d__Bacteria	p__Spirochaetota	c__Spirochaetia	o__CADAEX01	f__CADAEX01	g__CADAEX01	s__CADAEX01 sp902787125	0	0	0	0	0	0	0	0	0	143.427	0	0
RGMC.38981	d__Bacteria	p__Spirochaetota	c__Spirochaetia	o__CADAEX01	f__CADAEX01	g__CADAEX01	s__CADAEX01 sp902787125	0	0	0	0	0	0	0	0	0	125.257	0	0
RGMC.30249	d__Bacteria	p__Spirochaetota	c__Spirochaetia	o__Sphaerochaetales	f__Sphaerochaetaceae	g__RUG14846	s__	0	0	0	0	0	0	118.786	0	0	216.553	133.811	0
RGMC.5594	d__Bacteria	p__Spirochaetota	c__Spirochaetia	o__Sphaerochaetales	f__Sphaerochaetaceae	g__RUG14846	s__	0	0	0	0	0	0	119.828	0	0	190.669	103.612	0
RGMC.6517	d__Bacteria	p__Spirochaetota	c__Spirochaetia	o__Sphaerochaetales	f__Sphaerochaetaceae	g__RUG14846	s__RUG14846 sp947306375	299.294	0	0	201.508	0	208.707	335.482	233.718	267.924	430.181	262.604	272.575
RGMC.23647	d__Bacteria	p__Spirochaetota	c__Spirochaetia	o__Sphaerochaetales	f__Sphaerochaetaceae	g__UBA9732	s__	0	0	0	155.727	171.317	146.63	198.554	179.132	151.697	290.14	212.564	150.476
RGMC.1888	d__Bacteria	p__Spirochaetota	c__Spirochaetia	o__Sphaerochaetales	f__Sphaerochaetaceae	g__UBA9732	s__	0	0	0	0	0	0	0	0	0	265.84	156.721	0
RGMC.23711	d__Bacteria	p__Spirochaetota	c__Spirochaetia	o__Sphaerochaetales	f__Sphaerochaetaceae	g__UBA9732	s__	0	0	0	0	0	0	0	0	0	160.262	129.528	0
RGMC.27390	d__Bacteria	p__Spirochaetota	c__Spirochaetia	o__Sphaerochaetales	f__Sphaerochaetaceae	g__UBA9732	s__	0	0	0	0	0	0	0	0	0	135.823	0	0
RGMC.16358	d__Bacteria	p__Spirochaetota	c__Spirochaetia	o__Sphaerochaetales	f__Sphaerochaetaceae	g__UBA9732	s__UBA9732 sp017614625	0	0	0	0	0	0	0	0	0	165.535	0	0
RGMC.17167	d__Bacteria	p__Spirochaetota	c__Spirochaetia	o__Sphaerochaetales	f__Sphaerochaetaceae	g__UBA9732	s__UBA9732 sp017632495	0	0	0	0	0	0	0	0	0	458.485	0	0
RGMC.37624	d__Bacteria	p__Spirochaetota	c__Spirochaetia	o__Sphaerochaetales	f__Sphaerochaetaceae	g__UBA9732	s__UBA9732 sp900321635	486.366	274.606	343.796	460.98	429.225	402.521	1403.23	766.024	1075.71	1765.49	1352.16	1144.93
RGMC.4226	d__Bacteria	p__Spirochaetota	c__Spirochaetia	o__Sphaerochaetales	f__Sphaerochaetaceae	g__UBA9732	s__UBA9732 sp900321635	477.245	239.31	312.707	402.197	357.366	357.633	1234	665.657	916.33	1497.65	1082.57	1007.39
RGMC.37712	d__Bacteria	p__Spirochaetota	c__Spirochaetia	o__Sphaerochaetales	f__Sphaerochaetaceae	g__UBA9732	s__UBA9732 sp900321635	449.72	236.035	299.331	389.09	348.147	339.327	1172.69	640.117	889.887	1461.58	1070.11	963.461
RGMC.37400	d__Bacteria	p__Spirochaetota	c__Spirochaetia	o__Sphaerochaetales	f__Sphaerochaetaceae	g__UBA9732	s__UBA9732 sp900321635	375.759	189.81	249.643	318.967	294.864	285.473	956.872	516.977	715.229	1194.99	880.423	772.789
RGMC.15465	d__Bacteria	p__Spirochaetota	c__Spirochaetia	o__Sphaerochaetales	f__Sphaerochaetaceae	g__UBA9732	s__UBA9732 sp902781545	142.202	93.6079	123.604	183.092	177.735	162.405	147.236	169.292	96.7534	259.618	119.032	126.495
RGMC.19715	d__Bacteria	p__Spirochaetota	c__Spirochaetia	o__Sphaerochaetales	f__Sphaerochaetaceae	g__UBA9732	s__UBA9732 sp902781545	0	0	0	231.986	233.964	184.09	177.063	204.654	0	303.057	0	199.769
RGMC.11943	d__Bacteria	p__Spirochaetota	c__Spirochaetia	o__Sphaerochaetales	f__Sphaerochaetaceae	g__UBA9732	s__UBA9732 sp902781545	0	0	0	223.349	0	218.397	0	0	0	289.916	0	0
RGMC.12974	d__Bacteria	p__Spirochaetota	c__Spirochaetia	o__Sphaerochaetales	f__Sphaerochaetaceae	g__UBA9732	s__UBA9732 sp902781545	0	0	0	103.058	97.5347	98.4628	0	97.8522	0	140.004	0	0
RGMC.17118	d__Bacteria	p__Spirochaetota	c__Spirochaetia	o__Sphaerochaetales	f__Sphaerochaetaceae	g__UBA9732	s__UBA9732 sp902781545	0	0	0	119.901	0	105.497	0	0	0	173.583	0	0
RGMC.17265	d__Bacteria	p__Spirochaetota	c__Spirochaetia	o__Sphaerochaetales	f__Sphaerochaetaceae	g__UBA9732	s__UBA9732 sp902781545	0	0	0	108.763	0	99.6363	0	0	0	165.258	0	0
RGMC.12296	d__Bacteria	p__Spirochaetota	c__Spirochaetia	o__Sphaerochaetales	f__Sphaerochaetaceae	g__UBA9732	s__UBA9732 sp902781545	0	0	0	99.5304	0	88.3449	0	92.2546	0	132.89	0	0
RGMC.37496	d__Bacteria	p__Spirochaetota	c__Spirochaetia	o__Sphaerochaetales	f__Sphaerochaetaceae	g__UBA9732	s__UBA9732 sp902796335	594.624	519.345	666.232	953.124	879.547	708.413	664.245	702.05	420.888	1306.52	570.701	970.09
RGMC.10826	d__Bacteria	p__Spirochaetota	c__Spirochaetia	o__Sphaerochaetales	f__Sphaerochaetaceae	g__UBA9732	s__UBA9732 sp902796335	769.712	519.431	563.55	949.863	839.672	831.055	789.86	783.687	522.03	1524.6	482.43	707.634
RGMC.38915	d__Bacteria	p__Spirochaetota	c__Spirochaetia	o__Sphaerochaetales	f__Sphaerochaetaceae	g__UBA9732	s__UBA9732 sp902796335	517.095	444.904	518.333	944.835	1128.03	608.344	548.303	682.772	376.906	1441.46	811.673	600.206
RGMC.38863	d__Bacteria	p__Spirochaetota	c__Spirochaetia	o__Sphaerochaetales	f__Sphaerochaetaceae	g__UBA9732	s__UBA9732 sp902796335	367.38	412.096	446.64	915.827	1089.41	492.249	403.284	540.029	309.176	1345.95	791.556	599.2
RGMC.1691	d__Bacteria	p__Spirochaetota	c__Spirochaetia	o__Sphaerochaetales	f__Sphaerochaetaceae	g__UBA9732	s__UBA9732 sp902796335	492.031	350.836	430.213	626.571	557.243	567.16	546.047	553.684	333.515	962.977	297.18	491.328
RGMC.21074	d__Bacteria	p__Spirochaetota	c__Spirochaetia	o__Sphaerochaetales	f__Sphaerochaetaceae	g__UBA9732	s__UBA9732 sp902796335	514.749	347.076	432.079	621.906	512.011	560.485	553.527	533.963	320.418	913.758	288.549	477.259
RGMC.37503	d__Bacteria	p__Spirochaetota	c__Spirochaetia	o__Sphaerochaetales	f__Sphaerochaetaceae	g__UBA9732	s__UBA9732 sp902796335	386.276	293.193	348.615	563.426	488.982	525.771	509.336	505.004	335.129	915.212	299.717	426.114
RGMC.1096	d__Bacteria	p__Spirochaetota	c__Spirochaetia	o__Sphaerochaetales	f__Sphaerochaetaceae	g__UBA9732	s__UBA9732 sp902796335	404.502	294.958	345.923	559.858	484.943	489.378	464.593	476.617	300.215	863.907	273.656	409.976
RGMC.38678	d__Bacteria	p__Spirochaetota	c__Spirochaetia	o__Sphaerochaetales	f__Sphaerochaetaceae	g__UBA9732	s__UBA9732 sp902796335	358.22	242.849	290.866	460.632	388.207	410.938	391.09	387.027	242.648	689.966	207.413	355.606
RGMC.38870	d__Bacteria	p__Spirochaetota	c__Spirochaetia	o__Sphaerochaetales	f__Sphaerochaetaceae	g__UBA9732	s__UBA9732 sp902796335	240.441	190.526	199.179	344.807	287.97	310.252	294.363	284.627	183.898	521.648	167.945	246.805
RGMC.23902	d__Bacteria	p__Spirochaetota	c__Spirochaetia	o__Treponematales	f__Treponemataceae	g__Treponema_D	s__	1194.66	1257.11	1681.16	2649.58	3092.06	2283.83	3906.55	3937.57	4333.97	6023.75	4563.67	3084.3
RGMC.2294	d__Bacteria	p__Spirochaetota	c__Spirochaetia	o__Treponematales	f__Treponemataceae	g__Treponema_D	s__	3178.95	1517.52	1667.07	2312.45	2582.93	2389.53	1320.98	1505.98	1134.64	1831.03	1126.67	1272.88
RGMC.38120	d__Bacteria	p__Spirochaetota	c__Spirochaetia	o__Treponematales	f__Treponemataceae	g__Treponema_D	s__	2719.01	1317.07	1460.66	2018.48	2247.64	2089.81	1140.62	1307.94	975.764	1550.3	970.205	1121.16
RGMC.2395	d__Bacteria	p__Spirochaetota	c__Spirochaetia	o__Treponematales	f__Treponemataceae	g__Treponema_D	s__	307.685	265.33	306.133	507.667	600.644	521.491	1043.77	894.903	1195.37	1093.35	1140.34	732.921
RGMC.9235	d__Bacteria	p__Spirochaetota	c__Spirochaetia	o__Treponematales	f__Treponemataceae	g__Treponema_D	s__	263.848	266.251	258.891	474.959	548.477	514.034	922.723	854.756	1138.58	943.543	1107.83	568.787
RGMC.38552	d__Bacteria	p__Spirochaetota	c__Spirochaetia	o__Treponematales	f__Treponemataceae	g__Treponema_D	s__	203.864	205.046	223.064	408.878	506.855	399.986	700.44	660.715	833.879	839.351	854.386	541.534
RGMC.38830	d__Bacteria	p__Spirochaetota	c__Spirochaetia	o__Treponematales	f__Treponemataceae	g__Treponema_D	s__	999.33	539.685	550.135	856.689	1036.75	828.077	424.482	527.748	399.585	675.03	462.836	418.746
RGMC.2438	d__Bacteria	p__Spirochaetota	c__Spirochaetia	o__Treponematales	f__Treponemataceae	g__Treponema_D	s__	191.646	179.483	194.622	355.533	433.692	347.127	639.794	600.382	773.866	762.983	789.117	449.49
RGMC.23215	d__Bacteria	p__Spirochaetota	c__Spirochaetia	o__Treponematales	f__Treponemataceae	g__Treponema_D	s__	0	174.652	0	331.733	397.723	325.92	550.318	535.178	640.405	648.124	642.123	400.387
RGMC.6261	d__Bacteria	p__Spirochaetota	c__Spirochaetia	o__Treponematales	f__Treponemataceae	g__Treponema_D	s__	390.796	414.381	456.768	786.11	735.054	685.115	284.049	300.18	286.389	377.743	401.873	467.153
RGMC.10977	d__Bacteria	p__Spirochaetota	c__Spirochaetia	o__Treponematales	f__Treponemataceae	g__Treponema_D	s__	0	0	0	0	0	0	495.538	488.457	601.489	608.588	582.99	343.414
RGMC.34023	d__Bacteria	p__Spirochaetota	c__Spirochaetia	o__Treponematales	f__Treponemataceae	g__Treponema_D	s__	311.322	316.682	353.189	617.093	565.377	536.102	219.278	249.22	230.327	291.415	315.249	375.951
RGMC.22822	d__Bacteria	p__Spirochaetota	c__Spirochaetia	o__Treponematales	f__Treponemataceae	g__Treponema_D	s__	264.937	273.005	307.916	529.356	494.631	462.145	190.293	214.514	194.605	260.321	277.772	322.329
RGMC.5844	d__Bacteria	p__Spirochaetota	c__Spirochaetia	o__Treponematales	f__Treponemataceae	g__Treponema_D	s__	0	181.986	0	0	0	0	0	0	0	0	0	0
RGMC.34617	d__Bacteria	p__Spirochaetota	c__Spirochaetia	o__Treponematales	f__Treponemataceae	g__Treponema_D	s__	0	156.284	0	0	0	0	0	0	0	0	0	0
RGMC.11325	d__Bacteria	p__Spirochaetota	c__Spirochaetia	o__Treponematales	f__Treponemataceae	g__Treponema_D	s__	0	143.29	0	0	0	0	0	0	0	0	0	0
RGMC.23017	d__Bacteria	p__Spirochaetota	c__Spirochaetia	o__Treponematales	f__Treponemataceae	g__Treponema_D	s__	0	131.805	0	0	0	0	0	0	0	0	0	0
RGMC.6921	d__Bacteria	p__Spirochaetota	c__Spirochaetia	o__Treponematales	f__Treponemataceae	g__Treponema_D	s__	0	129.199	0	0	0	0	0	0	0	0	0	0
RGMC.23679	d__Bacteria	p__Spirochaetota	c__Spirochaetia	o__Treponematales	f__Treponemataceae	g__Treponema_D	s__	0	105.377	0	0	0	0	0	0	0	0	0	0
RGMC.20859	d__Bacteria	p__Spirochaetota	c__Spirochaetia	o__Treponematales	f__Treponemataceae	g__Treponema_D	s__Treponema_D bryantii_A	532.736	557.681	503.729	806.121	817.405	764.187	1438.45	1302.8	1660.84	1623.68	1589.28	1025.06
RGMC.20843	d__Bacteria	p__Spirochaetota	c__Spirochaetia	o__Treponematales	f__Treponemataceae	g__Treponema_D	s__Treponema_D bryantii_B	0	169.08	191.028	332.942	398.385	325.025	596.159	563.595	708.943	717.011	705.636	422.808
RGMC.11054	d__Bacteria	p__Spirochaetota	c__Spirochaetia	o__Treponematales	f__Treponemataceae	g__Treponema_D	s__Treponema_D bryantii_B	0	159.298	182.076	327.179	415.724	312.827	552.968	536.099	672.231	712.725	718.605	390.086
RGMC.20851	d__Bacteria	p__Spirochaetota	c__Spirochaetia	o__Treponematales	f__Treponemataceae	g__Treponema_D	s__Treponema_D bryantii_C	0	0	0	451.588	530.645	462.136	853.36	796.048	981.375	936.37	937.505	587.504
RGMC.20891	d__Bacteria	p__Spirochaetota	c__Spirochaetia	o__Treponematales	f__Treponemataceae	g__Treponema_D	s__Treponema_D sp000260795	0	343	0	0	0	0	0	0	0	0	0	0
RGMC.23712	d__Bacteria	p__Spirochaetota	c__Spirochaetia	o__Treponematales	f__Treponemataceae	g__Treponema_D	s__Treponema_D sp000260795	0	196.426	0	0	0	0	0	0	0	0	0	0
RGMC.39274	d__Bacteria	p__Spirochaetota	c__Spirochaetia	o__Treponematales	f__Treponemataceae	g__Treponema_D	s__Treponema_D sp002309195	0	0	0	131.343	177.23	125.373	0	0	0	0	0	0
RGMC.1275	d__Bacteria	p__Spirochaetota	c__Spirochaetia	o__Treponematales	f__Treponemataceae	g__Treponema_D	s__Treponema_D sp002309195	0	0	0	0	113.172	92.6021	0	0	0	0	0	0
RGMC.107	d__Bacteria	p__Spirochaetota	c__Spirochaetia	o__Treponematales	f__Treponemataceae	g__Treponema_D	s__Treponema_D sp002309195	0	0	0	0	0	86.8936	0	0	0	0	0	0
RGMC.18452	d__Bacteria	p__Spirochaetota	c__Spirochaetia	o__Treponematales	f__Treponemataceae	g__Treponema_D	s__Treponema_D sp002309195	0	0	0	0	0	85.6313	0	0	0	0	0	0
RGMC.27804	d__Bacteria	p__Spirochaetota	c__Spirochaetia	o__Treponematales	f__Treponemataceae	g__Treponema_D	s__Treponema_D sp002392405	176.866	171.15	0	284.216	349.427	261.241	442.811	455.984	437.304	459.504	398.227	290.809
RGMC.339	d__Bacteria	p__Spirochaetota	c__Spirochaetia	o__Treponematales	f__Treponemataceae	g__Treponema_D	s__Treponema_D sp002392405	0	153.969	0	248.91	286.682	216.093	351.456	387.282	326.762	384.645	295.392	242.557
RGMC.11067	d__Bacteria	p__Spirochaetota	c__Spirochaetia	o__Treponematales	f__Treponemataceae	g__Treponema_D	s__Treponema_D sp004554075	495.56	499.805	460.646	967.854	1518.2	897.443	1914.71	1714.84	2318.44	2090.74	2573	1328.5
RGMC.35345	d__Bacteria	p__Spirochaetota	c__Spirochaetia	o__Treponematales	f__Treponemataceae	g__Treponema_D	s__Treponema_D sp004554075	524.381	520.159	485.802	921.636	1352.97	911.711	1918.73	1713.54	2247.56	1916.33	2281.6	1357.17
RGMC.27884	d__Bacteria	p__Spirochaetota	c__Spirochaetia	o__Treponematales	f__Treponemataceae	g__Treponema_D	s__Treponema_D sp004554075	436.689	405.201	386.442	750.868	1096.8	745.65	1634.52	1389.97	1937.08	1575.11	1915.19	1105.63
RGMC.290	d__Bacteria	p__Spirochaetota	c__Spirochaetia	o__Treponematales	f__Treponemataceae	g__Treponema_D	s__Treponema_D sp016281495	923.946	378.117	384.712	636.4	618.522	554.147	485.018	524.115	567.334	652.313	516.165	610.152
RGMC.39283	d__Bacteria	p__Spirochaetota	c__Spirochaetia	o__Treponematales	f__Treponemataceae	g__Treponema_D	s__Treponema_D sp017544745	449.844	183.786	208.369	308.504	314.658	290.045	0	216.687	0	271.221	0	174.338
RGMC.16360	d__Bacteria	p__Spirochaetota	c__Spirochaetia	o__Treponematales	f__Treponemataceae	g__Treponema_D	s__Treponema_D sp017614655	0	0	0	125.322	152.541	138.678	0	0	139.613	183.134	143.7	144.883
RGMC.17404	d__Bacteria	p__Spirochaetota	c__Spirochaetia	o__Treponematales	f__Treponemataceae	g__Treponema_D	s__Treponema_D sp017651065	248.963	0	0	0	0	161.479	0	0	0	0	0	0
RGMC.738	d__Bacteria	p__Spirochaetota	c__Spirochaetia	o__Treponematales	f__Treponemataceae	g__Treponema_D	s__Treponema_D sp024680155	0	350.709	428.978	468.301	1396.07	341.154	596.852	1096.71	569.049	818.941	476.452	484.214
RGMC.533	d__Bacteria	p__Spirochaetota	c__Spirochaetia	o__Treponematales	f__Treponemataceae	g__Treponema_D	s__Treponema_D sp024681195	545.343	206.819	217.635	391.148	428.269	383.676	185.56	247.225	168.639	316.372	0	204.594
RGMC.436	d__Bacteria	p__Spirochaetota	c__Spirochaetia	o__Treponematales	f__Treponemataceae	g__Treponema_D	s__Treponema_D sp024691105	0	146.484	0	234.588	256.243	274.981	749.805	773.658	741.435	802.986	618.117	555.472
RGMC.29102	d__Bacteria	p__Spirochaetota	c__Spirochaetia	o__Treponematales	f__Treponemataceae	g__Treponema_D	s__Treponema_D sp902789325	0	397.857	0	713.705	810.049	838.393	1543.5	1324.68	1703.54	1355.49	1519.48	1019.69
RGMC.20438	d__Bacteria	p__Spirochaetota	c__Spirochaetia	o__Treponematales	f__Treponemataceae	g__Treponema_D	s__Treponema_D sp902789325	0	314.89	0	524.957	566.636	630.693	1211.75	1061.22	1385.61	1014.19	1121.25	801.863
RGMC.7104	d__Bacteria	p__Spirochaetota	c__Spirochaetia	o__Treponematales	f__Treponemataceae	g__Treponema_D	s__Treponema_D sp902789325	0	242.717	0	418.244	499.286	491.834	921.83	879.083	1108.87	849.76	1020.21	559.191
RGMC.34971	d__Bacteria	p__Spirochaetota	c__Spirochaetia	o__Treponematales	f__Treponemataceae	g__Treponema_D	s__Treponema_D sp902797305	0	0	0	0	0	0	0	0	157.155	176.024	221.348	122.845
RGMC.35084	d__Bacteria	p__Spirochaetota	c__Spirochaetia	o__Treponematales	f__Treponemataceae	g__Treponema_D	s__Treponema_D sp902797305	0	0	0	0	0	0	0	0	0	0	126.5	0
RGMC.21174	d__Bacteria	p__Spirochaetota	c__Spirochaetia	o__Treponematales	f__Treponemataceae	g__Treponema_D	s__Treponema_D sp902797305	0	0	0	0	0	0	0	0	0	0	120.599	0
RGMC.9172	d__Bacteria	p__Spirochaetota	c__Spirochaetia	o__Treponematales	f__Treponemataceae	g__Treponema_D	s__Treponema_D sp902797305	0	0	0	0	0	0	0	0	0	0	0	0
RGMC.6824	d__Bacteria	p__Spirochaetota	c__Spirochaetia	o__Treponematales	f__Treponemataceae	g__Treponema_D	s__Treponema_D sp946540605	0	195.296	208.209	362.33	459.085	405.023	731.165	736.492	892.293	740.504	884.231	445.408
RGMC.33154	d__Bacteria	p__Spirochaetota	c__Spirochaetia	o__Treponematales	f__Treponemataceae	g__Treponema_D	s__Treponema_D sp946540605	0	0	0	203.287	253.232	228.795	409.777	418.567	500.249	395.174	497.685	238.878
RGMC.384	d__Bacteria	p__Spirochaetota	c__Spirochaetia	o__Treponematales	f__Treponemataceae	g__Treponema_D	s__Treponema_D sp947165795	0	142.473	0	264.054	316.782	289.389	1197.21	784.626	1718.92	1221.97	1941.6	718.591
RGMC.17610	d__Bacteria	p__Spirochaetota	c__Spirochaetia	o__Treponematales	f__Treponemataceae	g__UBA1240	s__UBA1240 sp001603145	164.044	0	0	146.662	171.052	126.951	0	0	150.775	160.405	128.246	125.996
RGMC.27881	d__Bacteria	p__Spirochaetota	c__Spirochaetia	o__Treponematales	f__Treponemataceae	g__UBA1240	s__UBA1240 sp001603145	202.627	0	0	149.251	172.931	132.85	0	0	157.004	158.106	0	0
RGMC.35141	d__Bacteria	p__Spirochaetota	c__Spirochaetia	o__Treponematales	f__Treponemataceae	g__UBA1240	s__UBA1240 sp001603145	150.414	0	0	125.553	140.946	111.214	0	0	134.195	0	0	0
RGMC.9521	d__Bacteria	p__Spirochaetota	c__Spirochaetia	o__Treponematales	f__Treponemataceae	g__UBA1240	s__UBA1240 sp001603145	230.752	0	0	0	0	182.04	0	0	205.301	0	0	0
RGMC.27737	d__Bacteria	p__Spirochaetota	c__Spirochaetia	o__Treponematales	f__Treponemataceae	g__UBA1240	s__UBA1240 sp001603145	199.484	0	0	0	0	161.892	0	0	191.516	0	0	0
RGMC.14964	d__Bacteria	p__Spirochaetota	c__Spirochaetia	o__Treponematales	f__Treponemataceae	g__UBA1240	s__UBA1240 sp001603145	144.406	0	0	0	0	107.465	0	0	131.062	0	0	0
RGMC.7773	d__Bacteria	p__Spirochaetota	c__Spirochaetia	o__Treponematales	f__Treponemataceae	g__UBA1240	s__UBA1240 sp001603145	0	0	0	0	0	0	0	0	128.9	0	0	0
RGMC.1848	d__Bacteria	p__Spirochaetota	c__Spirochaetia	o__Treponematales	f__Treponemataceae	g__UBA1240	s__UBA1240 sp001603145	0	0	0	0	0	0	0	0	0	0	0	0
RGMC.39653	d__Bacteria	p__Synergistota	c__Synergistia	o__Synergistales	f__Aminobacteriaceae	g__JAFUYV01	s__JAFUYV01 sp016280565	1183.3	781.509	767.188	773.057	851.051	674.993	782.234	719.337	795.479	856.039	884.499	994.274
RGMC.11094	d__Bacteria	p__Synergistota	c__Synergistia	o__Synergistales	f__Aminobacteriaceae	g__JAFUYV01	s__JAFUYV01 sp016280565	1126.54	735.88	734.188	723.264	769.815	648.143	782.562	706.187	774.041	849.915	859.998	903.935
RGMC.1027	d__Bacteria	p__Synergistota	c__Synergistia	o__Synergistales	f__Aminobacteriaceae	g__JAFUYV01	s__JAFUYV01 sp016280565	971.451	594.512	602.449	578.07	581.781	528.817	616.187	564.095	603.484	659.471	612.288	760.701
RGMC.1701	d__Bacteria	p__Synergistota	c__Synergistia	o__Synergistales	f__Aminobacteriaceae	g__JAFUYV01	s__JAFUYV01 sp016280565	810.194	498.759	510.209	483.334	479.89	453.482	542.281	483.176	535.221	554.452	540.39	640.285
RGMC.12788	d__Bacteria	p__Synergistota	c__Synergistia	o__Synergistales	f__Aminobacteriaceae	g__JAFUYV01	s__JAFUYV01 sp016280565	775.144	509.137	508.702	497.86	528.215	446.064	527.979	475.231	516.655	559.979	567.801	601.431
RGMC.326	d__Bacteria	p__Synergistota	c__Synergistia	o__Synergistales	f__Aminobacteriaceae	g__JAFUYV01	s__JAFUYV01 sp016280565	691.388	435.787	441.83	417.799	427.958	391.683	461.932	407.176	441.192	479.499	464.616	573.553
RGMC.39200	d__Bacteria	p__Synergistota	c__Synergistia	o__Synergistales	f__Aminobacteriaceae	g__JAFUYV01	s__JAFUYV01 sp016280565	516.537	373.522	367.575	363.748	417.18	328.874	380.34	330.636	374.544	408.118	434.412	409.22
RGMC.40246	d__Bacteria	p__Synergistota	c__Synergistia	o__Synergistales	f__Aminobacteriaceae	g__JAFUYV01	s__JAFUYV01 sp016280565	493.726	358.589	341.704	348.058	417.238	314.171	337.103	327.043	345.818	390.117	416.483	391.913
RGMC.27162	d__Bacteria	p__Synergistota	c__Synergistia	o__Synergistales	f__Synergistaceae	g__Synergistes	s__	6973.69	2996.28	3062.61	3333.05	3575.64	2559.79	0	795.432	0	227.224	0	90.2448
RGMC.10743	d__Bacteria	p__Synergistota	c__Synergistia	o__Synergistales	f__Synergistaceae	g__Synergistes	s__Synergistes sp016288355	405.729	194.466	0	219.726	0	156.417	0	0	0	0	0	0
RGMC.12399	d__Bacteria	p__Synergistota	c__Synergistia	o__Synergistales	f__Synergistaceae	g__Synergistes	s__Synergistes sp016288355	400.235	196.394	0	205.8	0	0	0	0	0	0	0	0
RGMC.548	d__Bacteria	p__Synergistota	c__Synergistia	o__Synergistales	f__Synergistaceae	g__Synergistes	s__Synergistes sp016288355	392.965	215.735	0	0	0	0	0	0	0	0	0	0
RGMC.23811	d__Bacteria	p__Synergistota	c__Synergistia	o__Synergistales	f__Synergistaceae	g__Synergistes	s__Synergistes sp016288355	313.844	154.693	0	0	0	0	0	0	0	0	0	0
RGMC.15591	d__Bacteria	p__Synergistota	c__Synergistia	o__Synergistales	f__Synergistaceae	g__Synergistes	s__Synergistes sp017537925	3058.23	1299.45	1309.48	1345.67	1519.74	1000.35	0	0	0	0	0	0
RGMC.10	d__Bacteria	p__UBA3054	c__UBA3054	o__UBA3054	f__UBA3054	g__UBA3054	s__UBA3054 sp002366995	1628.8	1336.59	1322.29	1720.73	2007.16	1474.39	924.446	1151.74	773.8	1583.11	1038.07	1052.35
RGMC.40680	d__Bacteria	p__UBA3054	c__UBA3054	o__UBA3054	f__UBA3054	g__UBA3054	s__UBA3054 sp002366995	1065.95	891.869	907.902	1152.83	1261.27	1101.68	731.248	823.567	592.608	1092.36	734.768	727.192
RGMC.37513	d__Bacteria	p__UBA3054	c__UBA3054	o__UBA3054	f__UBA3054	g__UBA3054	s__UBA3054 sp002366995	1067.23	863.197	852.091	1156.78	1338.88	954.78	623.413	779.96	518.683	1084.58	723.07	676.798
RGMC.29322	d__Bacteria	p__UBA3054	c__UBA3054	o__UBA3054	f__UBA3054	g__UBA3054	s__UBA3054 sp002366995	1095.64	868.028	862.003	1075.79	1164.38	930.619	581.444	719.479	475.05	944.402	618.394	653.785
RGMC.17450	d__Bacteria	p__UBA3054	c__UBA3054	o__UBA3054	f__UBA3054	g__UBA3054	s__UBA3054 sp002366995	893.935	735.823	729.465	860.629	884.856	822.132	539.973	631.748	404.886	751.821	484.914	580.569
RGMC.15547	d__Bacteria	p__UBA3054	c__UBA3054	o__UBA3054	f__UBA3054	g__UBA3054	s__UBA3054 sp017539325	567.593	440.487	436.822	539.827	566.49	481.706	0	0	0	454.696	0	0
RGMC.26963	d__Bacteria	p__UBP6	c__UBA1177	o__UBA1177	f__UBA1177	g__UBA1177	s__	662.288	0	0	576.581	595.272	388.817	0	0	0	0	0	0
RGMC.15475	d__Bacteria	p__UBP6	c__UBA1177	o__UBA1177	f__UBA1177	g__UBA1177	s__UBA1177 sp002309575	3657.33	1825.06	2144.54	3202.05	3528.96	2089.03	0	914.163	0	506.481	0	238.372
RGMC.174	d__Bacteria	p__UBP6	c__UBA1177	o__UBA1177	f__UBA1177	g__UBA1177	s__UBA1177 sp002309575	2553.66	1294.2	1519.41	2377.95	2737.69	1525.36	0	687.089	0	395.264	0	181.082
RGMC.29220	d__Bacteria	p__UBP6	c__UBA1177	o__UBA1177	f__UBA1177	g__UBA1177	s__UBA1177 sp002309575	2325.17	1159.11	1371.01	2099.8	2366	1385.54	0	582.794	0	345.949	0	154.398
RGMC.12096	d__Bacteria	p__UBP6	c__UBA1177	o__UBA1177	f__UBA1177	g__UBA1177	s__UBA1177 sp002309575	2311.47	1175.09	1385.23	2070.19	2304.85	1361.01	0	623.169	0	346.308	0	164.316
RGMC.27036	d__Bacteria	p__UBP6	c__UBA1177	o__UBA1177	f__UBA1177	g__UBA1177	s__UBA1177 sp002309575	599.731	0	0	551.6	606.158	348.979	0	0	0	0	0	0
RGMC.40717	d__Bacteria	p__Verrucomicrobiota	c__Kiritimatiellia	o__LD1-PB3_B	f__Lenti-01	g__CACXEY01	s__	0	0	0	0	0	0	145.315	0	0	131.959	112.791	0
RGMC.27267	d__Bacteria	p__Verrucomicrobiota	c__Kiritimatiellia	o__LD1-PB3_B	f__Lenti-01	g__CACXEY01	s__	0	0	0	0	0	0	0	0	0	0	0	0
RGMC.39474	d__Bacteria	p__Verrucomicrobiota	c__Kiritimatiellia	o__RFP12	f__JAAYLN01	g__RGIG5952	s__	0	0	0	151.379	0	126.643	194.975	194.889	165.426	256.535	177.991	195.564
RGMC.23772	d__Bacteria	p__Verrucomicrobiota	c__Kiritimatiellia	o__RFP12	f__UBA1067	g__RGIG6720	s__	288.317	235.943	279.373	399.693	469.036	216.592	210.512	213.914	148.086	410.186	250.546	341.847
RGMC.12177	d__Bacteria	p__Verrucomicrobiota	c__Kiritimatiellia	o__RFP12	f__UBA1067	g__RUG572	s__RUG572 sp017430155	701.369	336.27	375.526	436.982	482.651	332.098	259.127	309.958	177.853	384.007	210.085	269.326
RGMC.2798	d__Bacteria	p__Verrucomicrobiota	c__Kiritimatiellia	o__RFP12	f__UBA1067	g__RUG572	s__RUG572 sp900320225	714.31	402.006	459.73	539.702	559.915	419.738	393.329	431.502	275.637	528.713	314.962	387.226
RGMC.18829	d__Bacteria	p__Verrucomicrobiota	c__Kiritimatiellia	o__RFP12	f__UBA1067	g__RUG572	s__RUG572 sp900320225	359.893	280.986	318.063	422.945	480.478	311.946	336.374	348.674	238.634	458.089	309.054	294.488
RGMC.20545	d__Bacteria	p__Verrucomicrobiota	c__Kiritimatiellia	o__RFP12	f__UBA1067	g__RUG572	s__RUG572 sp902763655	1111.53	767.101	797.22	962.098	834.22	804.926	692.345	822.455	492.464	893.647	413.666	779.769
RGMC.8807	d__Bacteria	p__Verrucomicrobiota	c__Kiritimatiellia	o__RFP12	f__UBA1067	g__UBA1067	s__	0	0	0	0	0	0	0	0	0	0	0	0
RGMC.12	d__Bacteria	p__Verrucomicrobiota	c__Kiritimatiellia	o__RFP12	f__UBA1067	g__UBA1067	s__UBA1067 sp016284515	0	0	0	0	0	0	0	0	0	0	0	0
RGMC.38623	d__Bacteria	p__Verrucomicrobiota	c__Kiritimatiellia	o__RFP12	f__UBA3636	g__UBA3636	s__	0	0	0	0	0	0	0	0	0	0	175.896	0
RGMC.27535	d__Bacteria	p__Verrucomicrobiota	c__Kiritimatiellia	o__RFP12	f__UBA3636	g__UBA3636	s__	0	0	0	0	0	0	0	0	0	0	0	0
RGMC.26974	d__Bacteria	p__Verrucomicrobiota	c__Lentisphaeria	o__Oligosphaerales	f__Oligosphaeraceae	g__UBA1407	s__	254.897	0	0	266.94	167.051	167.931	0	0	0	0	0	0
RGMC.12826	d__Bacteria	p__Verrucomicrobiota	c__Lentisphaeria	o__Victivallales	f__UBA1829	g__UBA11452	s__	152.528	0	0	0	0	0	0	0	0	0	0	0
RGMC.17755	d__Bacteria	p__Verrucomicrobiota	c__Lentisphaeria	o__Victivallales	f__UBA1829	g__UBA11452	s__UBA11452 sp015061565	365.973	0	0	246.095	0	185.981	0	199.278	0	231.553	0	165.386
RGMC.8143	d__Bacteria	p__Verrucomicrobiota	c__Lentisphaeria	o__Victivallales	f__UBA1829	g__UBA1732	s__UBA1732 sp017524965	288.548	142.964	164.724	270.194	243.386	229.21	374.433	312.438	354.77	378.902	322.09	264.036
RGMC.15310	d__Bacteria	p__Verrucomicrobiota	c__Lentisphaeria	o__Victivallales	f__UBA1829	g__UBA1732	s__UBA1732 sp017524965	0	0	0	0	0	0	107.453	0	112.883	121.442	115.481	0
RGMC.40058	d__Bacteria	p__Verrucomicrobiota	c__Lentisphaeria	o__Victivallales	f__UBA1829	g__UBA1732	s__UBA1732 sp017524965	0	0	0	0	0	0	0	0	0	0	0	0
RGMC.27420	d__Bacteria	p__Verrucomicrobiota	c__Lentisphaeria	o__Victivallales	f__UBA1829	g__UBA1732	s__UBA1732 sp017540385	352.624	0	0	335.026	295.335	224.195	0	177.637	0	222.874	0	0
RGMC.9243	d__Bacteria	p__Verrucomicrobiota	c__Lentisphaeria	o__Victivallales	f__UBA1829	g__UBA1732	s__UBA1732 sp017540385	237.06	0	119.944	220.021	188.671	162.661	0	131.86	0	149.222	0	0
RGMC.15450	d__Bacteria	p__Verrucomicrobiota	c__Lentisphaeria	o__Victivallales	f__UBA1829	g__UBA1732	s__UBA1732 sp017540385	198.668	0	0	190.996	161.344	136.04	0	0	0	127.835	0	0
RGMC.37992	d__Bacteria	p__Verrucomicrobiota	c__Lentisphaeria	o__Victivallales	f__UBA1829	g__UBA1732	s__UBA1732 sp017540385	155.612	0	0	147.591	123.273	102.249	0	0	0	0	0	0
RGMC.9794	d__Bacteria	p__Verrucomicrobiota	c__Lentisphaeria	o__Victivallales	f__Victivallaceae	g__UBA1784	s__	263.715	0	0	157.768	119.011	108.964	0	0	0	0	0	0
RGMC.23495	d__Bacteria	p__Verrucomicrobiota	c__Lentisphaeria	o__Victivallales	f__Victivallaceae	g__UBA1784	s__	258.058	0	0	145.694	0	103.795	0	0	0	0	0	0
RGMC.13018	d__Bacteria	p__Verrucomicrobiota	c__Verrucomicrobiae	o__Limisphaerales	f__UBA1412	g__UBA1412	s__UBA1412 sp002308515	465.15	132.757	138.17	241.503	254.869	165.505	256.777	172.908	245.019	288.856	290.522	221.371
RGMC.29331	d__Bacteria	p__Verrucomicrobiota	c__Verrucomicrobiae	o__Limisphaerales	f__UBA1412	g__UBA1412	s__UBA1412 sp002308515	444.884	122.665	130.979	235.44	250.208	153.906	236.12	168.786	226.592	285.478	286.227	200.919
RGMC.37545	d__Bacteria	p__Verrucomicrobiota	c__Verrucomicrobiae	o__Limisphaerales	f__UBA1412	g__UBA1412	s__UBA1412 sp016283885	280.001	0	0	174.658	175.784	116.115	171.9	128.488	165.208	211.53	207.684	151.2
RGMC.350	d__Bacteria	p__Verrucomicrobiota	c__Verrucomicrobiae	o__Limisphaerales	f__UBA1412	g__UBA1412	s__UBA1412 sp016283885	242.676	98.1124	0	151.056	162.595	104.245	162.143	114.357	150.578	195.599	185.5	135.69
RGMC.37505	d__Bacteria	p__Verrucomicrobiota	c__Verrucomicrobiae	o__Limisphaerales	f__UBA1412	g__UBA1412	s__UBA1412 sp016283885	202.176	0	0	124.23	130.884	84.4226	127.877	0	125.127	163.409	164.332	111.337
RGMC.37393	d__Bacteria	p__Verrucomicrobiota	c__Verrucomicrobiae	o__Limisphaerales	f__UBA1412	g__UBA1412	s__UBA1412 sp016283885	202.645	0	0	133.928	138.679	0	128.958	0	127.832	164.504	164.052	120.851
RGMC.246	d__Archaea	p__Halobacteriota	c__Methanomicrobia	o__Methanomicrobiales	f__Methanomicrobiaceae	g__Methanomicrobium	s__Methanomicrobium mobile	7692.24	6226.04	7839.35	11315.5	13196.8	6466.71	4636.62	4786.39	3088.78	10571	16016.7	13176.1
RGMC.19064	d__Archaea	p__Halobacteriota	c__Methanomicrobia	o__Methanomicrobiales	f__Methanomicrobiaceae	g__Methanomicrobium	s__Methanomicrobium mobile	8613.17	6253.35	7829.09	11048.2	12428.7	6627.64	4797.03	5176.6	3339.38	10572.1	15938.3	12917.8
RGMC.40093	d__Archaea	p__Halobacteriota	c__Methanomicrobia	o__Methanomicrobiales	f__Methanomicrobiaceae	g__Methanomicrobium	s__Methanomicrobium mobile	2678.85	856.122	1093.49	1441.5	1268.8	1105.86	997.063	1315.49	821.719	1684.11	2432.09	1717.96
RGMC.29206	d__Archaea	p__Halobacteriota	c__Methanomicrobia	o__Methanomicrobiales	f__Methanomicrobiaceae	g__Methanomicrobium	s__Methanomicrobium mobile	2640.2	815.499	1043.34	1357.04	1195.39	1030.86	925.001	1214.95	758.444	1564.85	2214.83	1602.23
RGMC.13431	d__Archaea	p__Halobacteriota	c__Methanomicrobia	o__Methanomicrobiales	f__Methanomicrobiaceae	g__Methanomicrobium	s__Methanomicrobium mobile	2201.6	811.573	993.106	1309.11	1215.22	956.733	863.964	1098.87	713.806	1509.31	2137.87	1464.03
RGMC.29234	d__Archaea	p__Halobacteriota	c__Methanomicrobia	o__Methanomicrobiales	f__Methanomicrobiaceae	g__Methanomicrobium	s__Methanomicrobium mobile	2481.3	780.652	1002.91	1255.51	1104	979.98	864.634	1081.67	667.251	1377.12	1875.65	1527.31
RGMC.12023	d__Archaea	p__Halobacteriota	c__Methanomicrobia	o__Methanomicrobiales	f__Methanomicrobiaceae	g__Methanomicrobium	s__Methanomicrobium mobile	2523.73	789.505	1018.51	1270.4	1128.63	951.913	800.402	1049.38	633.584	1378.09	1884.34	1447.1
RGMC.16945	d__Archaea	p__Halobacteriota	c__Methanomicrobia	o__Methanomicrobiales	f__Methanomicrobiaceae	g__Methanomicrobium	s__Methanomicrobium sp017412625	1367.6	733.569	781.19	1258.11	1528.35	728.162	510.623	639.49	0	1047.68	1579.41	1471.54
RGMC.17192	d__Archaea	p__Halobacteriota	c__Methanomicrobia	o__Methanomicrobiales	f__Methanomicrobiaceae	g__Methanomicrobium	s__Methanomicrobium sp017412625	965.026	347.821	430.442	618.596	592.408	430.623	369.772	534.126	0	724.359	1060.43	665.35
RGMC.21041	d__Archaea	p__Methanobacteriota	c__Methanobacteria	o__Methanobacteriales	f__Methanobacteriaceae	g__CADBMS01	s__CADBMS01 sp902795935	0	0	898.005	0	0	648.606	0	0	0	0	0	0
RGMC.27452	d__Archaea	p__Methanobacteriota	c__Methanobacteria	o__Methanobacteriales	f__Methanobacteriaceae	g__Methanobrevibacter	s__	4245.79	4314.7	4432.22	3943.18	4671.36	4031.35	8677.24	6443.01	14791	6788.38	17055.4	6438.99
RGMC.29487	d__Archaea	p__Methanobacteriota	c__Methanobacteria	o__Methanobacteriales	f__Methanobacteriaceae	g__Methanobrevibacter	s__	1692.91	1574.82	1610.2	1510.17	1883.86	1546.32	3555.19	2554.26	6579.69	2831.8	8397.3	2634.19
RGMC.3987	d__Archaea	p__Methanobacteriota	c__Methanobacteria	o__Methanobacteriales	f__Methanobacteriaceae	g__Methanobrevibacter	s__	1374.47	1188.85	1133.85	1214.15	1522.16	1102.48	1325.88	1383.82	2188.1	1581	2680.2	998.91
RGMC.40359	d__Archaea	p__Methanobacteriota	c__Methanobacteria	o__Methanobacteriales	f__Methanobacteriaceae	g__Methanobrevibacter	s__	696.135	644.551	617.608	626.625	774.501	593.885	856.525	788.483	1469.37	887.921	1901.08	665.653
RGMC.39035	d__Archaea	p__Methanobacteriota	c__Methanobacteria	o__Methanobacteriales	f__Methanobacteriaceae	g__Methanobrevibacter	s__	591.088	582.603	572.671	463.971	559.412	484.975	647.759	583.469	962.921	535.348	1094.47	438.903
RGMC.2050	d__Archaea	p__Methanobacteriota	c__Methanobacteria	o__Methanobacteriales	f__Methanobacteriaceae	g__Methanobrevibacter	s__	497.011	454.358	452.899	427.366	517.241	429.396	616.042	524.689	964.095	578.105	1115.63	437.744
RGMC.38973	d__Archaea	p__Methanobacteriota	c__Methanobacteria	o__Methanobacteriales	f__Methanobacteriaceae	g__Methanobrevibacter	s__	0	0	0	0	0	410.474	584.432	0	915.346	0	1046.85	441.873
RGMC.36488	d__Archaea	p__Methanobacteriota	c__Methanobacteria	o__Methanobacteriales	f__Methanobacteriaceae	g__Methanobrevibacter	s__	0	0	0	0	0	0	143.335	225.482	181.717	173.81	172.947	114.376
RGMC.17834	d__Archaea	p__Methanobacteriota	c__Methanobacteria	o__Methanobacteriales	f__Methanobacteriaceae	g__Methanobrevibacter	s__Methanobrevibacter olleyae_A	0	0	0	0	0	0	0	0	0	0	1352.44	0
RGMC.34651	d__Archaea	p__Methanobacteriota	c__Methanobacteria	o__Methanobacteriales	f__Methanobacteriaceae	g__Methanobrevibacter	s__Methanobrevibacter ruminantium_A	286.491	254.89	268.981	0	269.442	258.784	356.14	305.322	585.507	278.528	648.132	242.226
RGMC.91	d__Archaea	p__Methanobacteriota	c__Methanobacteria	o__Methanobacteriales	f__Methanobacteriaceae	g__Methanobrevibacter	s__Methanobrevibacter sp016291275	3756.57	5244.34	6516.04	7366.81	6953.73	7743.52	8418.24	7652.12	8624.66	6932.84	7951.6	9815.89
RGMC.242	d__Archaea	p__Methanobacteriota	c__Methanobacteria	o__Methanobacteriales	f__Methanobacteriaceae	g__Methanobrevibacter	s__Methanobrevibacter sp016291275	859.402	752.651	744.14	679.533	822.88	716.052	864.691	803.553	1419.1	780.64	1616.44	602.455
RGMC.11994	d__Archaea	p__Methanobacteriota	c__Methanobacteria	o__Methanobacteriales	f__Methanobacteriaceae	g__Methanobrevibacter	s__Methanobrevibacter sp017404125	0	0	0	0	0	0	0	0	1143.84	0	1234.14	0
RGMC.12101	d__Archaea	p__Methanobacteriota	c__Methanobacteria	o__Methanobacteriales	f__Methanobacteriaceae	g__Methanobrevibacter	s__Methanobrevibacter sp017432245	0	0	0	0	0	0	0	0	795.99	0	1031.09	0
RGMC.17514	d__Archaea	p__Methanobacteriota	c__Methanobacteria	o__Methanobacteriales	f__Methanobacteriaceae	g__Methanobrevibacter	s__Methanobrevibacter sp017646885	0	0	0	0	0	0	0	0	706.315	0	887.557	0
RGMC.17147	d__Archaea	p__Methanobacteriota	c__Methanobacteria	o__Methanobacteriales	f__Methanobacteriaceae	g__Methanobrevibacter	s__Methanobrevibacter sp017646885	0	0	0	0	0	0	0	0	734.646	0	829.15	0
RGMC.17259	d__Archaea	p__Methanobacteriota	c__Methanobacteria	o__Methanobacteriales	f__Methanobacteriaceae	g__Methanobrevibacter	s__Methanobrevibacter sp017646885	0	0	0	0	0	0	0	0	0	0	845.285	0
RGMC.843	d__Archaea	p__Methanobacteriota	c__Methanobacteria	o__Methanobacteriales	f__Methanobacteriaceae	g__Methanobrevibacter	s__Methanobrevibacter sp902784195	491.727	728.381	677.552	872.903	1189.06	459.586	604.636	683.635	1077.07	1184.9	2122.03	922.333
RGMC.8668	d__Archaea	p__Methanobacteriota	c__Methanobacteria	o__Methanobacteriales	f__Methanobacteriaceae	g__Methanobrevibacter	s__Methanobrevibacter sp902784195	0	0	0	0	0	0	0	0	634.483	0	821.713	0
RGMC.38735	d__Archaea	p__Methanobacteriota	c__Methanobacteria	o__Methanobacteriales	f__Methanobacteriaceae	g__Methanobrevibacter	s__Methanobrevibacter sp902784195	0	0	0	0	0	0	0	0	532.652	0	704.537	0
RGMC.38790	d__Archaea	p__Methanobacteriota	c__Methanobacteria	o__Methanobacteriales	f__Methanobacteriaceae	g__Methanobrevibacter	s__Methanobrevibacter sp902784195	0	0	0	0	0	0	0	0	482.741	0	599.788	0
RGMC.19967	d__Archaea	p__Methanobacteriota	c__Methanobacteria	o__Methanobacteriales	f__Methanobacteriaceae	g__Methanobrevibacter	s__Methanobrevibacter sp902784195	0	0	0	0	0	0	0	0	332.689	0	450.297	0
RGMC.1904	d__Archaea	p__Methanobacteriota	c__Methanobacteria	o__Methanobacteriales	f__Methanobacteriaceae	g__Methanobrevibacter	s__Methanobrevibacter sp902784195	0	0	0	0	0	0	0	0	0	0	484.58	0
RGMC.19168	d__Archaea	p__Methanobacteriota	c__Methanobacteria	o__Methanobacteriales	f__Methanobacteriaceae	g__Methanobrevibacter	s__Methanobrevibacter sp902784195	0	0	0	0	0	0	0	0	0	0	466.307	0
RGMC.19597	d__Archaea	p__Methanobacteriota	c__Methanobacteria	o__Methanobacteriales	f__Methanobacteriaceae	g__Methanobrevibacter	s__Methanobrevibacter sp902784195	0	0	0	0	0	0	0	0	0	0	432.843	0
RGMC.29896	d__Archaea	p__Methanobacteriota	c__Methanobacteria	o__Methanobacteriales	f__Methanobacteriaceae	g__Methanobrevibacter	s__Methanobrevibacter sp937898925	601.095	513.337	546.391	461.798	540.443	502.222	850.617	679.601	1276.77	660.05	1379.15	565.762
RGMC.29638	d__Archaea	p__Methanobacteriota	c__Methanobacteria	o__Methanobacteriales	f__Methanobacteriaceae	g__Methanobrevibacter_A	s__	31064.8	35196.2	32057.1	38301	46854.3	35218.3	20010.3	34201.4	18743.4	28014.5	19364.6	30637.8
RGMC.26337	d__Archaea	p__Methanobacteriota	c__Methanobacteria	o__Methanobacteriales	f__Methanobacteriaceae	g__Methanobrevibacter_A	s__	5555.63	5730.23	5290.89	6242.74	7600.96	5632.81	1214.64	3554.49	0	2374.23	0	2298.56
RGMC.1305	d__Archaea	p__Methanobacteriota	c__Methanobacteria	o__Methanobacteriales	f__Methanobacteriaceae	g__Methanobrevibacter_A	s__	0	382.335	0	399.801	473.117	363.138	929.032	725.575	1141.44	744.938	1175.65	1053.04
RGMC.28957	d__Archaea	p__Methanobacteriota	c__Methanobacteria	o__Methanobacteriales	f__Methanobacteriaceae	g__Methanobrevibacter_A	s__	0	0	0	0	0	0	0	0	370.458	0	422.219	0
RGMC.29011	d__Archaea	p__Methanobacteriota	c__Methanobacteria	o__Methanobacteriales	f__Methanobacteriaceae	g__Methanobrevibacter_A	s__	0	0	0	0	0	0	0	0	184.04	0	245.122	0
RGMC.35755	d__Archaea	p__Methanobacteriota	c__Methanobacteria	o__Methanobacteriales	f__Methanobacteriaceae	g__Methanobrevibacter_A	s__	0	0	0	0	0	0	0	170.433	0	162.926	0	0
RGMC.32128	d__Archaea	p__Methanobacteriota	c__Methanobacteria	o__Methanobacteriales	f__Methanobacteriaceae	g__Methanobrevibacter_A	s__	0	0	0	0	0	0	0	0	127.61	0	0	0
RGMC.11887	d__Archaea	p__Methanobacteriota	c__Methanobacteria	o__Methanobacteriales	f__Methanobacteriaceae	g__Methanobrevibacter_A	s__Methanobrevibacter_A sp017407115	0	0	0	0	0	0	0	0	173.948	0	177.749	0
RGMC.11784	d__Archaea	p__Methanobacteriota	c__Methanobacteria	o__Methanobacteriales	f__Methanobacteriaceae	g__Methanobrevibacter_A	s__Methanobrevibacter_A sp017409525	0	0	0	0	0	0	275.84	0	298.129	0	363.012	363.339
RGMC.40709	d__Archaea	p__Methanobacteriota	c__Methanobacteria	o__Methanobacteriales	f__Methanobacteriaceae	g__Methanobrevibacter_A	s__Methanobrevibacter_A sp017409525	0	0	0	0	0	0	0	0	309.326	0	366.138	400.549
RGMC.39878	d__Archaea	p__Methanobacteriota	c__Methanobacteria	o__Methanobacteriales	f__Methanobacteriaceae	g__Methanobrevibacter_A	s__Methanobrevibacter_A sp017409525	0	0	0	0	0	0	0	0	264.429	0	310.44	0
RGMC.38039	d__Archaea	p__Methanobacteriota	c__Methanobacteria	o__Methanobacteriales	f__Methanobacteriaceae	g__Methanobrevibacter_A	s__Methanobrevibacter_A sp017434525	766.063	943.113	872.777	1042.64	1251.42	950.656	2514.34	1886.47	3200.1	2010.01	3436.38	2855.04
RGMC.22451	d__Archaea	p__Methanobacteriota	c__Methanobacteria	o__Methanobacteriales	f__Methanobacteriaceae	g__Methanobrevibacter_A	s__Methanobrevibacter_A sp017434525	891.616	1130.84	1007.04	1196.44	1482.66	1004.76	1823.34	1553.32	2118.3	1580.56	2312.77	2113.4
RGMC.396	d__Archaea	p__Methanobacteriota	c__Methanobacteria	o__Methanobacteriales	f__Methanobacteriaceae	g__Methanobrevibacter_A	s__Methanobrevibacter_A sp024689425	71688.2	67560.1	64819.7	68724	75532.6	61223.4	10844.2	31623.8	6678.73	18871.3	5790.88	19465.7
RGMC.18573	d__Archaea	p__Methanobacteriota	c__Methanobacteria	o__Methanobacteriales	f__Methanobacteriaceae	g__Methanobrevibacter_A	s__Methanobrevibacter_A sp900320515	0	0	0	0	0	0	225.477	0	260.947	178.409	265.821	250.946
RGMC.19864	d__Archaea	p__Methanobacteriota	c__Methanobacteria	o__Methanobacteriales	f__Methanobacteriaceae	g__Methanobrevibacter_A	s__Methanobrevibacter_A sp902783085	0	0	0	0	0	0	199.286	0	326.423	137.547	324.607	153.53
RGMC.40185	d__Archaea	p__Methanobacteriota	c__Methanobacteria	o__Methanobacteriales	f__Methanobacteriaceae	g__Methanobrevibacter_A	s__Methanobrevibacter_A sp902789505	0	0	0	0	953.272	548.782	409.179	682.544	418.112	709.136	513.269	535.915
RGMC.12070	d__Archaea	p__Methanobacteriota	c__Methanobacteria	o__Methanobacteriales	f__Methanobacteriaceae	g__Methanobrevibacter_A	s__Methanobrevibacter_A sp902789505	0	0	0	208.493	262.311	171.445	206.673	280.561	214.815	292.385	239.813	243.698
RGMC.33627	d__Archaea	p__Methanobacteriota	c__Methanobacteria	o__Methanobacteriales	f__Methanobacteriaceae	g__Methanosphaera	s__	585.075	635.296	903.612	956.36	767.435	808.325	0	457.677	0	0	0	0
RGMC.35026	d__Archaea	p__Methanobacteriota	c__Methanobacteria	o__Methanobacteriales	f__Methanobacteriaceae	g__Methanosphaera	s__	250.109	234.867	398.112	456.75	346.907	397.373	0	0	0	0	0	0
RGMC.17821	d__Archaea	p__Methanobacteriota	c__Methanobacteria	o__Methanobacteriales	f__Methanobacteriaceae	g__Methanosphaera	s__Methanosphaera stadtmanae_C	0	566.823	572.609	698.738	0	575.79	0	0	0	0	0	0
RGMC.10841	d__Archaea	p__Thermoplasmatota	c__Thermoplasmata	o__Methanomassiliicoccales	f__Methanomethylophilaceae	g__	s__	539.032	0	0	913.918	0	0	0	0	0	1442.62	1657.13	0
RGMC.22901	d__Archaea	p__Thermoplasmatota	c__Thermoplasmata	o__Methanomassiliicoccales	f__Methanomethylophilaceae	g__JAKSHX01	s__	5110.7	0	0	7259.23	0	0	0	0	0	9465.03	6168.23	0

## Sheet: archae significance
mag	3-nop	con	sem	p-value	difference
RGMC.10841	3.42348	2.98772	323.995	0.0039	**
RGMC.11784	2.33792	0.00432137	69.99	0.0222	**
RGMC.11887	1.77544	0.00432137	37.075	0.1396
RGMC.11994	2.59916	0.00432137	250.932	0.1396
RGMC.12023	3.07912	3.1077	445.674	0.8728
RGMC.12070	2.39328	2.03363	63.336	0.036	**
RGMC.12101	2.48504	0.00432137	194.968	0.1396
RGMC.1305	2.98346	2.43256	166.271	0.0039	**
RGMC.13431	3.1136	3.09653	416.375	0.8728
RGMC.16945	2.9424	3.02823	394.269	0.5218
RGMC.17147	2.41771	0.00432137	165.289	0.1396
RGMC.17192	2.7482	2.75217	236.677	0.7488
RGMC.17259	2.15195	0.00432137	140.881	0.3173
RGMC.17514	2.42595	0.00432137	169.63	0.1396
RGMC.17821	0.00432137	2.60567	128.807	0.0222	**
RGMC.17834	2.35491	0.00432137	225.406	0.3173
RGMC.18573	2.29654	0.00432137	41.514	0.0074	**
RGMC.1904	1.91261	0.00432137	80.763	0.3173
RGMC.19064	3.94405	3.94453	3088.55	0.7488
RGMC.19168	1.89613	0.00432137	77.718	0.3173
RGMC.19597	1.86422	0.00432137	72.141	0.3173
RGMC.19864	2.28158	0.00432137	50.661	0.0074	**
RGMC.19967	2.11895	0.00432137	83.919	0.1396
RGMC.2050	2.84946	2.66657	125.021	0.025	**
RGMC.21041	0.00432137	2.41293	166.176	0.1396
RGMC.22451	3.28284	3.04918	212.585	0.0039	**
RGMC.22901	3.41607	3.31443	3035.05	0.8489
RGMC.242	3.00668	2.88278	192.463	0.2002
RGMC.246	3.9402	3.94401	3316.14	0.631
RGMC.26337	3.19719	3.77887	925.286	0.0039	**
RGMC.27452	4.00145	3.63085	2024.5	0.0039	**
RGMC.28957	2.12425	0.00432137	83.822	0.1396
RGMC.29011	1.86056	0.00432137	45.92	0.1396
RGMC.29206	3.14021	3.12971	485.063	0.7488
RGMC.29234	3.09106	3.10326	433.479	0.8728
RGMC.29487	3.64605	3.21415	1062.7	0.0039	**
RGMC.29638	4.40076	4.56169	5046.67	0.0104	**
RGMC.29896	2.95569	2.72309	159.687	0.0065	**
RGMC.32128	1.34788	0.00432137	21.268	0.3173
RGMC.33627	1.88812	2.89044	135.773	0.0028	**
RGMC.34651	2.60601	2.35046	114.719	0.0547	**
RGMC.35026	0.00432137	2.54203	36.128	0.0021	**
RGMC.35755	1.75258	0.00432137	35.152	0.1396
RGMC.36488	2.22948	0.00432137	15.31	0.0021	**
RGMC.38039	2.71402	2.38591	488.533	0.7032
RGMC.38735	2.31641	0.00432137	132.286	0.1396
RGMC.38790	2.25871	0.00432137	115.105	0.1396
RGMC.38973	2.69818	1.8415	249.34	0.0495	**
RGMC.39035	2.85217	2.73517	127.869	0.2623
RGMC.396	4.19164	4.83416	6058.46	0.0039	**
RGMC.3987	3.22891	3.09934	320.315	0.1495
RGMC.39878	1.98597	0.00432137	60.887	0.1396
RGMC.40093	3.17486	3.14874	504.322	0.7488
RGMC.40185	2.73696	2.40028	218.84	0.1922
RGMC.40359	3.03975	2.81947	224.349	0.0104	**
RGMC.40709	2.25611	0.00432137	81.079	0.0585	**
RGMC.843	3.04144	2.86779	333.884	0.2002
RGMC.8668	2.38687	0.00432137	155.388	0.1396
RGMC.91	3.91559	3.79689	1012.96	0.025	**
