# Supplementary material for: Metatranscriptomic changes in the propionate pathway and carbohydrate enzyme revealed the rebalancing mechanism of rumen microbiota after CH4 inhibition by 3-NOP
Source: Research Square preprint supplement (doi:10.21203/rs.3.rs-7121971/v1), 2025-08-11
Supplement: Supplementary file 5 [file 66b8c3b9dd496b292d0d77d4.xlsx]

## Sheet: rawdata
family	treatment	Bacteria_norank	Bacteroidaceae	Bacteroidales_norank	Clostridiaceae	Fibrobacteraceae	Lachnospiraceae	Neocallimastigales	Others	Prevotellaceae	Ruminococcaceae	Spirochaetaceae
AA3	con	0	0	0	0	0	0	0	0.352585	0	0	0
CBM11	con	0	0	0	0	0.536413	0	0	0	0	0	0
CBM22	con	0	0	0	0	0	0	0	0	0	0.622356	0
CBM3	con	0	0	0	0	0	0.082224	0	0	0	0.56097	0
CBM30	con	0	0	0	0	11.3273	0	0	9.25972	0	0	1.32813
CBM32	con	0.538758	0	0.370052	0	0	0	0	0.289941	0	0	0.334941
CBM35	con	0	0	0	0	4.56923	0	0	0	0	0	0
CBM37	con	0	0	0	0	0	0	0	0	0	0.379937	0
CBM4	con	0	0	0	0.270139	1.63008	0	0	0	0	0.704971	0
CBM48	con	0	0	0	1.18274	0	0.280401	0	2.09159	0.220186	0.19816	0
CBM51	con	0	0	0	0	1.63354	0	0	0	0	0	0
CBM6	con	0.310478	0	0	0.309255	0.695022	0.486924	0	0	0.176418	0	0.442944
CBM62	con	0	0	0	0	0	0	0	0	0.308569	0	0
CBM67	con	0	0	0	0	0	0	0	0.0908962	0	0	0
CBM74	con	0	0	0	0	0	0	0	0	0	0.446446	0
CBM9	con	0.126425	0	0	0	0	0.188172	0	0	0	0	0
CBM91	con	0	0	0	0	0	0	0	0	0.0583343	0	0
CE1	con	13.5498	0	0.808755	0	0	0	19.0631	0	0.390387	1.36687	1.79387
CE11	con	2.1914	0.957186	1.24498	0	0	0.797053	0	7.95266	2.31075	0	0
CE12	con	0.041131	0	0	0	4.63296	0	0	0.241601	1.33957	0	0
CE15	con	0.0335843	1.3556	0	0.252799	7.05702	7.22188	0.996912	2.15872	1.55481	0.564613	0.258551
CE17	con	0	0	0	0	0	1.63911	0	0	0	0	0
CE19	con	0	0	0.583089	0	0	0	0	0	0	0	0
CE2	con	0.61219	0	0	1.16919	0.734891	0.283205	0.851034	0	0.637103	0	0
CE20	con	2.55802	0.174114	0.222727	0	0.447706	0	0	1.78488	0.736445	0.342158	28.2891
CE3	con	0	0	0	0	0	0.312615	0.665829	0	0	0.545757	0
CE4	con	0	0	0	0.458133	0	1.18463	0	0.875551	3.93355	6.46902	0
CE6	con	1.63882	0	1.04446	0.318518	1.9421	0	1.64363	3.53674	0.35299	0	0.480302
CE7	con	0	0.139043	0.459916	0	0	0	0	0.0892922	0.685155	0	0
CE8	con	0	0.419076	0	0	0.127176	0	0	0.81732	0.130043	0	0
CE9	con	3.66338	0	0	0	0	0.386208	0	1.91035	0.963965	0	0
GH1	con	0.33079	0	1.58063	65.2503	0.483391	0.500793	14.7726	25.06092033333333	50.6727	41.1744	0.313879
GH10	con	13.265	0.720968	0.6442	1.88342	27.5708	3.11055	1.05894	3.02637	4.78813	6.22373	2.75694
GH103	con	0	0	0	0	0	0	0	0.476721	0	0	0
GH104	con	0	0	0	0	0	0	0	4.28142	0	0	0
GH105	con	0.923889	0.177622	1.44826	2.80248	0	1.41061	0	3.46205	3.07541	0	0.188719
GH106	con	0.364596	0.400645	0	0.725359	0	0	0	3.08441	0.148894	0	1.97886
GH109	con	5.74002	0.459872	2.58469	0.747194	0	0	0.202899	2.99459	1.22054	0	5.56136
GH11	con	11.0143	0	0	0.519208	2.32065	0.887621	23.5112	2.72275	1.91286	1.68015	0
GH110	con	0	0	0	0	0	0	0	0.25323	0	0	0
GH112	con	0	0	0	0	0	0	0	0.684921	0	0	0
GH113	con	0	0	0	0	0	0.126621	0	0	0	0.101045	0
GH115	con	0	0.439652	1.04168	0	0	0.195079	0	0.17455	4.13499	0.516239	0.881357
GH116	con	0	0	0	0	2.00877	0	0	0.0614355	0	0	0
GH120	con	0.969845	0.779443	0	3.72453	0	3.99019	0.390825	0.154794	31.804	8.97944	1.76273
GH123	con	0	0	0	0	0	0	0	2.517	0	0	0
GH125	con	0	0.204144	0	1.60614	0	0	0	0.855587	2.79437	0	0
GH127	con	0	1.39382	0	0.67266	0	0.479153	0	16.622	4.02396	0.162952	0.423472
GH13	con	50.4745	7.58842	20.8286	81.3851	8.35807	40.0494	0.495063	60.2647	18.2328	28.2107	14.2147
GH130	con	2.57942	1.70641	0.139292	1.14553	0	0.470118	0	1.51494	1.49552	2.29485	3.273
GH133	con	2.03083	3.81724	1.66399	0	0.404597	0.178977	0	5.76742	4.20281	0	0
GH140	con	0	0.167296	0	0	0	0	0	0	0.692103	0	0
GH141	con	0	0.069461	0	0	0	0	0	0	0.335971	0.190961	0
GH144	con	0	0	0	0	0	0	0	0.687143	0.359403	0	0
GH146	con	0	0.436922	0	0	1.06553	0.192263	0	2.87643	0.831473	1.47809	0
GH148	con	0	0.677183	0	0	0	0	0	0	0	0	0
GH149	con	0	0	0.0405548	0	0	0	0	0	0	0	0
GH15	con	0	0	0	0	0	0	0	0.335732	0	0	0
GH154	con	0	0.246583	0	0.369033	0	0	0	0.171102	5.79509	19.3222	0
GH16	con	0	0	0	0	6.26449	0	1.38908	0.844592	0	0.816249	0
GH163	con	0	0.654065	0	0	0	0	0	0.211452	0	0	0
GH166	con	0	0	0	0	0	0.272581	0	0	0	0	0
GH171	con	1.85719	2.94308	1.70216	0	0.538979	0.368404	0	5.29641	0.723745	0	0
GH172	con	1.76546	0	0	0.0911848	0	0	0	0.848232	0	0.210653	0
GH173	con	0	0	0	0.630869	0	0	0	0.574192	0	0	0
GH18	con	0	0.659202	0	0.187976	4.14399	1.26841	0	2.27596	0	0	1.53407
GH2	con	14.7618	4.36423	9.10416	6.10803	1.40732	2.26967	0	8.1682	6.23326	2.51096	0.596839
GH20	con	1.66486	0.395598	0.253796	0.28971	0	0	0	14.426	2.72775	3.9595	0.402127
GH23	con	0.287959	3.50348	0.425152	0	0.855455	0	0	3.89666	1.24778	0.181679	0
GH25	con	0	0	0	0.0766192	0	0.630595	0	0	2.08882	0	0
GH26	con	0	0	3.14392	0	2.35234	2.114	0	0.682404	0.617144	0.473289	0.779286
GH27	con	1.0803	0.653622	0.145823	0.184708	0	0	0	6.02271	1.91871	2.1099	0.837278
GH28	con	1.07717	0.255968	1.75841	0.602484	0	0.91391	0	3.01279	13.1996	0	0.22159
GH29	con	15.5685	5.2853	1.58328	1.71603	0	3.3232	4.6382	3.90377	2.74807	0.286034	0.761391
GH3	con	32.3322	7.49225	15.2659	25.1916	3.05588	30.4456	5.15983	47.8983	11.5474	24.6443	3.74908
GH30	con	0	0.0800388	0	0	3.1726	0	0.207152	0.31708	1.28728	0.898034	0
GH31	con	4.86277	4.52679	15.14885433333334	3.91023	0	8.00583	0.498729	18.2768	4.56748	8.72399	11.0577
GH32	con	3.09915	0.169647	0	1.38943	0	4.30549	0	1.89939	2.12062	2.49765	0.284908
GH33	con	1.11042	0.154028	0.141957	0	0	0	0	0	0	0.642775	0
GH35	con	0	1.25145	0	0	2.33923	1.01482	0	1.00516	1.94558	0	1.04364
GH36	con	0.952113	2.91161	0	1.15793	0	2.21138	0	5.83311	5.80343	10.0264	4.96236
GH38	con	0.103961	12.3526	0	2.2298	0	0.966152	0	3.4047	0	1.50469	0
GH39	con	0	0.0601735	0	0	0	5.14519	0	8.11574	0	0	0.587206
GH4	con	10.0275	0	0.455128	3.30784	0	0.713127	0	1.7456	5.3937	1.14412	0.545384
GH42	con	0	0.41684	0	0	0	0	0	0.526798	0.184074	0	0.740129
GH43	con	7.25797	7.4021	21.8444	3.81291	3.24105	38.0119	3.17031	36.6158	41.2566	31.4626	3.46296
GH44	con	0	0	0	0	0.52564	0	0	1.45297	0	0.566752	2.85899
GH45	con	0	0	0	0	3.68394	0	0	0	0	0	0
GH48	con	1.25852	0	0	0	0	0	4.86777	0	0	19.4856	0
GH5	con	9.70128	0.324692	3.07689	40.3515	23.0568	4.34431	16.1158	13.0921	6.88191	6.80543	5.55286
GH50	con	0.104715	0	0	0	0	0	0	0	0	0	0
GH51	con	1.8507	2.74144	2.60371	3.62316	0.155814	5.33179	0	5.85974	4.32769	1.82703	3.64425
GH53	con	0	0.508548	0	8.0965	0.323153	0	0	1.02451	1.47195	0.187525	0
GH54	con	1.87655	0.221553	0.273177	0	0	0	0	1.32987	0	0	0
GH55	con	0	0	0	0	0	0.330832	0	0	0	0	0
GH57	con	51.5754	10.0122	14.2288	0	1.39075	0	0	10.5588	2.27127	1.95665	2.12191
GH6	con	0	0	0.84884	0	0.458916	0	6.88916	4.54012	0	0.0902995	0.958616
GH63	con	0	0	0	0.520355	0	0	0	0.487276	0	0	0
GH64	con	0	0	0	0	0	0	0.717495	0	0	0	0
GH65	con	0	1.48786	0	0	0	0.251046	0	1.68414	0	0	0
GH67	con	0.814758	0.546723	0.284822	0.493252	0	0.466479	0	0.431315	1.10602	0	0
GH73	con	0	0.491059	0	0.611638	0	1.72766	0	7.15521	0.116132	0	0
GH74	con	0.554505	0	0	0	0	0	0	0.331738	0	2.70046	0
GH76	con	0	0	0	0	0	0.437278	0	0.285775	0.55452	0	0
GH77	con	3.35664	1.51897	1.63042	8.77701	1.03733	15.5661	0	19.7547	4.51986	12.6568	1.71168
GH78	con	0.510142	0.29829	0	0.0728348	0.247592	1.0845	0	3.15656	13.8194	0.262492	0.129691
GH8	con	0	0.739732	1.97805	2.3799	2.32387	1.60707	0.943655	0	0	0.199611	1.30986
GH87	con	0	0	0	0	0	0	0	7.08076	0	0	0
GH88	con	0.519157	0.0814122	0	0	0	0	0	0.359228	0	0.0773045	0
GH89	con	1.37146	1.38002	0	0	0	0	0	0.671374	1.21124	0	0
GH9	con	2.1754	0.131994	0.688022	1.87762	10.6334	0.616765	0.751226	4.36069	0.782798	11.286	1.14399
GH92	con	5.44093	1.52137	0.938614	0	0	1.62756	0.477973	8.35235	0.856093	0.491667	0.219787
GH94	con	0.504634	0	0.61153	1.72811	1.59498	2.04212	0	2.03717	11.2825	4.4665	16.6368
GH95	con	0	1.29744	1.03764	0	0.703771	0.965004	0.180067	3.59776	1.39494	0.145916	0
GH97	con	5.3521	2.97841	3.3027	0.184549	0	0	0	2.80896	2.34329	0	0
GH98	con	0	0	0	0	0	0	0	0	0.645149	0	0
GT1	con	0	0	0	0	0	0.224367	0	0.577175	0	0.083259	0
GT105	con	0	0.467162	0	0	0	0	0	0	0	0	0
GT11	con	0	0	0	0	0	0	0	0	0	0	0.458603
GT111	con	0.503335	0	0.123351	0	0	0	0	0	1.45035	0.793086	0
GT112	con	0.558751	0	0	0	0	0	0	0.92699	0	0	0
GT113	con	0	0.216743	0	0	0	0	0	0	0	0	0
GT19	con	1.60058	0.356453	0	0	0.157693	0	0	2.03662	0.376376	0	0
GT2	con	31.2812	14.7319	7.10967	6.74589	7.79152	30.4104	6.31279	73.7202	23.3935	43.3139	11.8037
GT20	con	0	0	0	0	0	0	0	0.400206	0	0	0
GT26	con	0	0.444557	0.887516	0.236176	0.702083	0.343938	0	0.420939	0	0	0.0637872
GT28	con	0	4.29828	0	0.240294	1.1633	0.716165	0	2.88721	0.952284	1.95013	0
GT3	con	1.74147	0.248356	74.1665	0	0	0	0	12.9187	11.6092	0	0
GT30	con	0.122411	0.446499	0.263046	1.17746	0	0	0	3.45748	0.48581	0	0
GT32	con	0	0.19997	0	0	0	0.271147	0	0	0.0304908	0	0.671306
GT35	con	7.34841	1.10084	1.06667	5.21019	0.100977	14.3525	0.713939	12.3831	2.92222	3.60239	3.04529
GT39	con	0	0	0	0.401076	0	0	0	0	0	0	0
GT4	con	8.69698	11.4547	11.369	6.83724	8.32969	8.94884	0	25.7849	9.07231	4.98974	1.74982
GT41	con	0	0	0	0	0	0	0	0.437972	0	0	0
GT5	con	7.47826	17.8164	8.52353	26.229	0.858663	21.1426	0.472503	22.0454	24.3105	17.8791	9.64011
GT51	con	1.53184	3.09412	2.2343	5.91967	1.51402	3.91312	0.154987	12.4757	2.31679	38.5869	1.9599
GT66	con	0	0	0	0	0	0	0	0.114969	0	0.118775	0
GT8	con	0	0	0	0.653651	0	0.222319	0	1.62983	0.549347	0	1.8385
GT81	con	0	0	0	0	0	0	0	0	0	4.38556	0
GT83	con	0	0	0	0	0	0	0	1.73741	0	0	0
GT9	con	0	0.164327	0.635707	0.186569	0	0.650286	0	1.1014	2.16445	0	0
PL1	con	0	1.44301	2.64603	0.20967	2.73715	0.805407	0	1.06328	0.908426	0.987731	0.163475
PL10	con	0	0.485799	0	0	0	0	0	0	0	0	0
PL11	con	4.10417	0.102486	0.377382	0	0.269269	0	0	3.15671	56.1191	0.405458	0
PL12	con	0	0	0	0	0	0.518347	0	0	0	0	0
PL14	con	0	0	0	0	0.24475	0	0	0	0	0	0
PL33	con	0	0	0	0.141319	0	0	0	0	0.57717	0	0
PL35	con	0	0	0	0	0	0	0	0.16756	0	0	0
PL38	con	0	0.174563	0	0	0	0	0	0	0	0	0
PL4	con	0	0	0.123537	0	0	0	0.644004	0.668303	0	0	0
PL8	con	0	0	0	0	0	0	0	0.49731	0	0	0
PL9	con	0	0	0	0.371268	0.234252	0.142132	0	0	0	1.90487	0.472406
AA3	3-NOP	0	0	0	0	0	0	0	0.32115	0	0	0
CBM11	3-NOP	0	0	0	0	0.295421	0	0	0	0	0	0
CBM22	3-NOP	0	0	0	0	0	0	0	0	0	0.547463	0
CBM3	3-NOP	0	0	0	0	0	0.00489683	0	0	0	0.345313	0
CBM30	3-NOP	0	0	0	0	27.778	0	0	0.689249	0	0	1.0376
CBM32	3-NOP	0.510647	0	0.334242	0	0	0	0	0.336861	0	0	0.652658
CBM35	3-NOP	0	0	0	0	12.5764	0	0	0	0	0	0
CBM37	3-NOP	0	0	0	0	0	0	0	0	0	0.299124	0
CBM4	3-NOP	0	0	0	0.434957	5.66098	0	0	0	0	0.706545	0
CBM48	3-NOP	0	0	0	0.969429	0	0.273943	0	1.73656	0	0.125154	0
CBM51	3-NOP	0	0	0	0	3.89551	0	0	0	0	0	0
CBM6	3-NOP	0.478919	0	0	0.209296	0.946567	0.538628	0	0	0.284255	0	0.66037
CBM62	3-NOP	0	0	0	0	0	0	0	0	0.353534	0	0
CBM67	3-NOP	0	0	0	0	0	0	0	0.100593	0	0	0
CBM74	3-NOP	0	0	0	0	0	0	0	0	0	0.402016	0
CBM9	3-NOP	0.0572245	0	0	0	0	0.452919	0	0	0	0	0
CBM91	3-NOP	0	0	0	0	0	0	0	0	0.163744	0	0
CE1	3-NOP	10.5867	0	1.5944	0	0	0	8.18539	0	0.646247	0.42212	1.29003
CE11	3-NOP	3.67004	1.91237	2.80612	0	0	1.47705	0	8.47178	3.0867	0	0
CE12	3-NOP	0.0806927	0	0	0	5.89653	0	0	0.26454	0.751846	0	0
CE15	3-NOP	0.0701428	1.8472	0	0.326035	21.2127	2.13748	1.55055	3.62038	3.358	0.308269	0.247811
CE17	3-NOP	0	0	0	0	0	1.00444	0	0	0	0	0
CE19	3-NOP	0	0	0.55716	0	0	0	0	0	0	0	0
CE2	3-NOP	0.51635	0	0	1.44913	1.49929	0.273637	0.748197	0	0.888432	0	0
CE20	3-NOP	4.66242	0.60016	0.438426	0	0.986657	0	0	1.78292	1.05779	0.343044	24.6759
CE3	3-NOP	0	0	0	0	0	0.297637	0.645951	0	0	0.148153	0
CE4	3-NOP	0	0	0	0.484803	0	0.917944	14.0194	0.973991	3.52637	0	0
CE6	3-NOP	1.81577	0	1.383	0.309432	3.38066	0	2.13181	5.00585	0.415918	0	0.794457
CE7	3-NOP	0	0.517149	1.14222	0	0	0	0	0.009061	1.24618	0	0
CE8	3-NOP	0	1.44555	0	0	0.355303	0	0	1.42406	0.127958	0	0
CE9	3-NOP	2.31042	0	0	0	0	0.199736	0	1.71155	0.793139	0	0
GH1	3-NOP	0.280044	0	1.68665	51.6274	0.74407	0.345674	12.5361	23.0517	0	35.7723	0.690131
GH10	3-NOP	14.7081	1.48376	0.962608	1.53897	20.1203	2.47582	0.862789	4.82254	6.05749	5.0442	2.76953
GH103	3-NOP	0	0	0	0	0	0	0	0.425355	0	0	0
GH104	3-NOP	0	0	0	0	0	0	0	2.07732	0	0	0
GH105	3-NOP	0.787361	0.442341	3.10984	2.40295	0	1.78014	0	3.28463	4.86344	0	0.121952
GH106	3-NOP	0.145903	0.322652	0	2.06916	0	0	0	1.49871	0.0991588	0	2.64022
GH109	3-NOP	3.93474	0.56125	7.08183	0.613293	0	0	0.305525	3.74954	0.975659	0	4.85584
GH11	3-NOP	3.85815	0	0	0.503204	3.78273	0.635115	21.6073	1.51957	1.11179	0.29764	0
GH110	3-NOP	0	0	0	0	0	0	0	0.122023	0	0	0
GH112	3-NOP	0	0	0	0	0	0	0	0.660464	0	0	0
GH113	3-NOP	0	0	0	0	0	0.13282	0	0	0	0.112066	0
GH115	3-NOP	0	1.22226	1.17921	0	0	0.114016	0	0.289992	2.51415	0.420717	1.09012
GH116	3-NOP	0	0	0	0	0.717968	0	0	0.0516468	0	0	0
GH120	3-NOP	0.837279	0.578779	0	4.24429	0	4.43821	1.62163	10.5522	0	1.63069	2.49411
GH123	3-NOP	0	0	0	0	0	0	0	2.25376	0	0	0
GH125	3-NOP	0	0.278	0	2.07219	0	0	0	0.809242	3.25719	0	0
GH127	3-NOP	0	2.94344	0	0.958952	0	0.882979	0	4.98416	5.77999	0.155197	0.575415
GH13	3-NOP	33.8593	10.2959	29.5965	37.5979	14.0279	41.0179	0.810756	63.1863	19.634	24.734	12.4516
GH130	3-NOP	3.03988	2.22035	0.148413	2.1209	0	0.730792	0	1.50602	2.1503	2.35445	2.95669
GH133	3-NOP	1.7342	5.91814	4.08916	0	0.430989	0.613889	0	1.77716	4.49345	0	0
GH140	3-NOP	0	0.595577	0	0	0	0	0	0	0.562821	0	0
GH141	3-NOP	0	0.212313	0	0	0	0	0	0	0.971041	0.0546748	0
GH144	3-NOP	0	0	0	0	0	0	0	0.824412	1.04614	0	0
GH146	3-NOP	0	0.418933	0	0	2.33833	0.41652	0	2.99131	0.801475	0.50227	0
GH148	3-NOP	0	0.293606	0	0	0	0	0	0	0	0	0
GH149	3-NOP	0	0	0.0822492	0	0	0	0	0	0	0	0
GH15	3-NOP	0	0	0	0	0	0	0	0.287542	0	0	0
GH154	3-NOP	0	0.266298	0	0.457877	0	0	5.60722	0.061857	5.01788	0.279002	0
GH16	3-NOP	0	0	0	0	8.02487	0	2.42128	0.875808	0	0.297833	0
GH163	3-NOP	0	0.346206	0	0	0	0	0	0.0517905	0	0	0
GH166	3-NOP	0	0	0	0	0	0.108203	0	0	0	0	0
GH171	3-NOP	1.3124	2.142	1.45616	0	1.48361	0.35881	0	2.93392	0	0	0
GH172	3-NOP	1.20482	0	0	0.00476617	0	0	0	0.460226	0	0.172541	0
GH173	3-NOP	0	0	0	0.704149	0	0	0	0.630458	0	0	0
GH18	3-NOP	0	0.751293	0	0.0768488	7.92065	1.39276	0	1.65338	0	0	1.40888
GH2	3-NOP	5.71016	8.50002	4.5793	5.38582	5.15752	2.74869	0	8.06713	8.26798	2.80374	0.495792
GH20	3-NOP	1	0.797905	0.32422	0.641421	0	0	0	9.19303	1.12143	2.57343	0.455831
GH23	3-NOP	0.764322	4.29576	0.911651	0	1.78842	0	0	7.95635	1.8813	0.471177	0
GH25	3-NOP	0	0	0	0.215451	0	1.15641	0	0	3.20725	0	0
GH26	3-NOP	0	0	7.29273	0	2.59331	1.41457	0	1.177	0.96524	0.434536	0.762325
GH27	3-NOP	0.801071	0.785124	0.113212	0.172426	0	0	0	5.52066	1.54982	1.70493	2.79154
GH28	3-NOP	0.795372	0.573285	2.45323	1.52268	0	1.31904	0	4.46557	16.3082	0	0.506124
GH29	3-NOP	4.28765	1.63398	0.734558	0.834978	0	2.23237	1.39709	5.10642	1.67837	0.721463	0.790763
GH3	3-NOP	32.274	14.9244	18.2844	19.8257	4.37644	22.5565	4.44953	53.5823	14.8094	18.8923	3.73871
GH30	3-NOP	0	0.14255	0	0	4.10182	0	0.189766	0.229135	0.789401	1.02566	0
GH31	3-NOP	3.57574	2.46263	11.4161	3.61434	0	6.12636	5.70319	19.0988	5.96711	5.04561	7.35552
GH32	3-NOP	2.8223	0.564427	0	1.4424	0	5.15422	0	2.92812	0.484082	2.04833	0.747789
GH33	3-NOP	0.958243	0.283183	0.251437	0	0	0	0	0	0	0.750869	0
GH35	3-NOP	0	1.69724	0	0	4.96634	0.695967	0	1.28528	2.21282	0	0.595197
GH36	3-NOP	0.875491	2.94992	0	0.943802	0	2.06524	1.83559	5.77665	5.01202	6.21413	4.24323
GH38	3-NOP	0.113245	19.7825	0	1.55255	0	1.56317	0	1.99114	0	0.89564	0
GH39	3-NOP	0	0.00699067	0	0	0	11.4316	0	5.51124	0	0	0.749417
GH4	3-NOP	9.6329	0	0.73016	3.55745	0	0.726118	0	3.42153	8.10252	0.823382	0.550816
GH42	3-NOP	0	0.461778	0	0	0	0	0	0.735136	0	0	3.00733
GH43	3-NOP	6.36647	7.57113	15.2669	4.3663	5.08104	29.5187	4.27954	29.2892	25.4362	9.20063	3.41545
GH44	3-NOP	0	0	0	0	1.61929	0	0	1.75601	0	0.627089	2.72719
GH45	3-NOP	0	0	0	0	6.65308	0	0	0	0	0	0
GH48	3-NOP	1.12518	0	0	0	0	0	4.81542	0	0	16.6224	0
GH5	3-NOP	12.1256	1.17754	3.42354	51.0584	45.8757	6.71919	34.5258	11.6194	11.7952	4.77427	8.69074
GH50	3-NOP	0.373997	0	0	0	0	0	0	0	0	0	0
GH51	3-NOP	2.87486	3.23161	4.00743	3.29444	0.361612	5.37779	0	5.4858	5.41847	1.49494	2.97509
GH53	3-NOP	0	1.005	0	3.0613	0.826733	0	0	1.0345	1.49309	0.227638	0
GH54	3-NOP	1.761	0.449055	0.179574	0	0	0	0	0.805848	0	0	0
GH55	3-NOP	0	0	0	0	0	0.325228	0	0	0	0	0
GH57	3-NOP	51.3599	11.3632	7.64371	0	2.77167	0	3.75302	10.368	4.58183	0	3.15087
GH6	3-NOP	0	0	1.58128	0	0.532279	0	6.18189	1.8392	0	0	1.46703
GH63	3-NOP	0	0	0	0.266093	0	0	0	1.17057	0	0	0
GH64	3-NOP	0	0	0	0	0	0	0.442461	0	0	0	0
GH65	3-NOP	0	2.33745	0	0	0	0.342145	0	0.658587	0	0	0
GH67	3-NOP	1.72745	1.33781	0.426021	0.379219	0	0.251209	0	0.405438	1.91351	0	0
GH73	3-NOP	0	0.338847	0	0.293781	0	3.15842	0	8.32087	0.271936	0	0
GH74	3-NOP	0.562526	0	0	0	0	0	0	0.333865	0	5.26299	0
GH76	3-NOP	0	0	0	0	0	0.771114	0	0.297818	0.682187	0	0
GH77	3-NOP	4.29506	3.3208	2.99397	9.32353	1.41665	7.57705	7.45653	17.0613	7.26907	5.54482	2.64833
GH78	3-NOP	0.815253	0.336912	0	0.0844257	0.741413	1.20064	0	3.10757	8.00998	0.247525	0.184037
GH8	3-NOP	0	1.27647	3.1005	2.02537	4.15508	1.6207	0.887489	0	0	0.151364	1.85455
GH87	3-NOP	0	0	0	0	0	0	0	4.98304	0	0	0
GH88	3-NOP	0.352877	0.0651307	0	0	0	0	0	0.339848	0	0.151057	0
GH89	3-NOP	0.986519	1.96929	0	0	0	0	0	0.604547	1.70037	0	0
GH9	3-NOP	6.60448	0.160081	1.66415	1.57397	25.2795	0.804819	7.11401	4.94327	1.14074	2.78877	2.45518
GH92	3-NOP	2.78345	1.32459	1.17449	0	0	4.29002	0.834309	9.9067	1.12479	0.684615	0.233194
GH94	3-NOP	0.353192	0	1.52464	1.45815	3.50712	3.46574	0	2.34765	18.0198	3.30348	13.0849
GH95	3-NOP	0	1.12187	1.6596	0	0.828129	0.804888	0.203639	4.35745	1.18691	0.0134582	0
GH97	3-NOP	3.60377	2.46056	4.22496	0.168374	0	0	0	3.25485	2.5829	0	0
GH98	3-NOP	0	0	0	0	0	0	0	0	0.739475	0	0
GT1	3-NOP	0	0	0	0	0	0.166457	0.295533	0.287135	0	0	0
GT105	3-NOP	0	0.0349345	0	0	0	0	0	0	0	0	0
GT11	3-NOP	0	0	0	0	0	0	0	0	0	0	0.283139
GT111	3-NOP	0.561993	0	0.313646	0	0	0	0.641119	1.81282	0	0.412794	0
GT112	3-NOP	0.451288	0	0	0	0	0	0	0.560262	0	0	0
GT113	3-NOP	0	0.450888	0	0	0	0	0	0	0	0	0
GT19	3-NOP	0.926686	0.584432	0	0	0.438076	0	0	2.63557	0.692218	0	0
GT2	3-NOP	20.0033	26.4359	12.1868	8.5249	15.8623	23.2632	22.0861	120.248	27.4315	10.1836	11.1064
GT20	3-NOP	0	0	0	0	0	0	0	0.346695	0	0	0
GT26	3-NOP	0	0.323023	2.8292	0.129918	2.92107	0.343658	0	0.166253	0	0	0.290251
GT28	3-NOP	0	3.41651	0	0.44777	2.88887	0.805584	0	2.66292	1.02785	1.25995	0
GT3	3-NOP	1.50825	0.319613	35.6058	0	0	0	0	16.6618	4.50956	0	0
GT30	3-NOP	0.762057	1.25435	0.384591	0.695808	0	0	0	3.83717	0.672211	0	0
GT32	3-NOP	0	0.507092	0	0	0	0.49738	0	0.145869	0	0	0.425299
GT35	3-NOP	8.1701	1.68788	2.08441	4.84967	0.252987	20.9684	0.561114	11.9595	2.32762	3.83872	4.30008
GT39	3-NOP	0	0	0	0.405828	0	0	0	0	0	0	0
GT4	3-NOP	5.37731	17.4491	13.3903	7.99165	19.2804	9.86402	2.5634	24.7395	13.9326	3.49036	2.39084
GT41	3-NOP	0	0	0	0	0	0	0	0.446052	0	0	0
GT5	3-NOP	5.57401	15.2376	10.5185	23.0837	0.933976	21.1616	0.450676	42.7537	6.86764	52.1163	11.8302
GT51	3-NOP	0.892447	6.54407	3.97467	4.98991	1.27796	4.10165	40.1022	11.1188	2.61264	1.13211	2.33142
GT66	3-NOP	0	0	0	0	0	0	0.724794	0.240573	0	0	0
GT8	3-NOP	0	0	0	0.552495	0	0.288548	0	1.67204	0.588112	0	2.26607
GT81	3-NOP	0	0	0	0	0	0	1.37321	0	0	0	0
GT83	3-NOP	0	0	0	0	0	0	0	1.34263	0	0	0
GT9	3-NOP	0	0.748019	1.28879	0.525101	0	0.611355	0	1.19201	4.10465	0	0
PL1	3-NOP	0	1.83344	4.39532	0.698465	5.30479	2.3667	0	0.865247	1.53308	1.05826	0.188471
PL10	3-NOP	0	1.9675	0	0	0	0	0	0	0	0	0
PL11	3-NOP	1.15281	0.188112	0.794615	0	0.542243	0	0	5.92835	32.0257	0.0850587	0
PL12	3-NOP	0	0	0	0	0	0.391403	0	0	0	0	0
PL14	3-NOP	0	0	0	0	0.693584	0	0	0	0	0	0
PL33	3-NOP	0	0	0	0.223939	0	0	0	0	0.687559	0	0
PL35	3-NOP	0	0	0	0	0	0	0	0.292349	0	0	0
PL38	3-NOP	0	0.189519	0	0	0	0	0	0	0	0	0
PL4	3-NOP	0	0	0.219231	0	0	0	0.762348	0.953509	0	0	0
PL8	3-NOP	0	0	0	0	0	0	0	0.479616	0	0	0
PL9	3-NOP	0	0	0	0.385516	0.9145	0.401287	0	0	0	1.56591	0.627257

## Sheet: 3-nop-family
family	AA3	CBM11	CBM22	CBM3	CBM30	CBM32	CBM35	CBM37	CBM4	CBM48	CBM51	CBM6	CBM62	CBM67	CBM74	CBM9	CBM91	CE1	CE11	CE12	CE15	CE17	CE19	CE2	CE20	CE3	CE4	CE6	CE7	CE8	CE9	GH1	GH10	GH103	GH104	GH105	GH106	GH109	GH11	GH110	GH112	GH113	GH115	GH116	GH120	GH123	GH125	GH127	GH13
treatment	3-NOP	3-NOP	3-NOP	3-NOP	3-NOP	3-NOP	3-NOP	3-NOP	3-NOP	3-NOP	3-NOP	3-NOP	3-NOP	3-NOP	3-NOP	3-NOP	3-NOP	3-NOP	3-NOP	3-NOP	3-NOP	3-NOP	3-NOP	3-NOP	3-NOP	3-NOP	3-NOP	3-NOP	3-NOP	3-NOP	3-NOP	3-NOP	3-NOP	3-NOP	3-NOP	3-NOP	3-NOP	3-NOP	3-NOP	3-NOP	3-NOP	3-NOP	3-NOP	3-NOP	3-NOP	3-NOP	3-NOP	3-NOP	3-NOP
Bacteria_norank	0	0	0	0	0	0.510647	0	0	0	0	0	0.478919	0	0	0	0.0572245	0	10.5867	3.67004	0.0806927	0.0701428	0	0	0.51635	4.66242	0	0	1.81577	0	0	2.31042	0.280044	14.7081	0	0	0.787361	0.145903	3.93474	3.85815	0	0	0	0	0	0.837279	0	0	0	33.8593
Bacteroidaceae	0	0	0	0	0	0	0	0	0	0	0	0	0	0	0	0	0	0	1.91237	0	1.8472	0	0	0	0.60016	0	0	0	0.517149	1.44555	0	0	1.48376	0	0	0.442341	0.322652	0.56125	0	0	0	0	1.22226	0	0.578779	0	0.278	2.94344	10.2959
Bacteroidales_norank	0	0	0	0	0	0.334242	0	0	0	0	0	0	0	0	0	0	0	1.5944	2.80612	0	0	0	0.55716	0	0.438426	0	0	1.383	1.14222	0	0	1.68665	0.962608	0	0	3.10984	0	7.08183	0	0	0	0	1.17921	0	0	0	0	0	29.5965
Clostridiaceae	0	0	0	0	0	0	0	0	0.434957	0.969429	0	0.209296	0	0	0	0	0	0	0	0	0.326035	0	0	1.44913	0	0	0.484803	0.309432	0	0	0	51.6274	1.53897	0	0	2.40295	2.06916	0.613293	0.503204	0	0	0	0	0	4.24429	0	2.07219	0.958952	37.5979
Fibrobacteraceae	0	0.295421	0	0	27.778	0	12.5764	0	5.66098	0	3.89551	0.946567	0	0	0	0	0	0	0	5.89653	21.2127	0	0	1.49929	0.986657	0	0	3.38066	0	0.355303	0	0.74407	30.1203	0	0	0	0	0	3.78273	0	0	0	0	0.717968	0	0	0	0	14.0279
Lachnospiraceae	0	0	0	0.00489683	0	0	0	0	0	0.273943	0	0.538628	0	0	0	0.452919	0	0	1.47705	0	2.13748	1.00444	0	0.273637	0	0.297637	0.917944	0	0	0	0.199736	0.345674	2.47582	0	0	1.78014	0	0	0.635115	0	0	0.13282	0.114016	0	4.43821	0	0	0.882979	41.0179
Neocallimastigales	0	0	0	0	0	0	0	0	0	0	0	0	0	0	0	0	0	8.18539	0	0	1.55055	0	0	0.748197	0	0.645951	14.0194	2.13181	0	0	0	12.5361	0.862789	0	0	0	0	0.305525	21.6073	0	0	0	0	0	1.62163	0	0	0	0.810756
Prevotellaceae	0	0	0	0	0	0	0	0	0	0	0	0.284255	0.353534	0	0	0	0.163744	0.646247	3.0867	0.751846	3.358	0	0	0.888432	1.05779	0	3.52637	0.415918	1.24618	0.127958	0.793139	0	6.05749	0	0	4.86344	0.0991588	0.975659	1.11179	0	0	0	2.51415	0	0	0	3.25719	5.77999	19.634
Ruminococcaceae	0	0	0.547463	0.345313	0	0	0	0.299124	0.706545	0.125154	0	0	0	0	0.402016	0	0	0.42212	0	0	0.308269	0	0	0	0.343044	0.148153	0	0	0	0	0	35.7723	5.0442	0	0	0	0	0	0.29764	0	0	0.112066	0.420717	0	1.63069	0	0	0.155197	24.734
Spirochaetaceae	0	0	0	0	1.0376	0.652658	0	0	0	0	0	0.66037	0	0	0	0	0	1.29003	0	0	0.247811	0	0	0	24.6759	0	0	0.794457	0	0	0	0.690131	2.76953	0	0	0.121952	2.64022	4.85584	0	0	0	0	1.09012	0	2.49411	0	0	0.575415	12.4516
Others	0.32115	0	0	0	0.689249	0.336861	0	0	0	1.73656	0	0	0	0.100593	0	0	0	0	8.47178	0.26454	3.62038	0	0	0	1.78292	0	0.973991	5.00585	0.009061	1.42406	1.71155	23.0517	4.82254	0.425355	2.07732	3.28463	1.49871	3.74954	1.51957	0.122023	0.660464	0	0.289992	0.0516468	10.5522	2.25376	0.809242	4.98416	63.1863
			0.547463	0.345313	1.72685	0.989518	0	0.299124	0.706545	1.86172	0	0.66037	0	0.100593	0.402016	0	0	1.71215	8.47178	0.26454	4.17647	0	0	0	26.8019	0.148153	0.973991	5.80031	0.009061	1.42406	1.71155	59.5141	12.6363	0.425355	2.07732	3.40658	4.13892	8.60539	1.81721	0.122023	0.660464	0.112066	1.80083	0.0516468	14.677	2.25376	0.809242	5.71478	100.372
[truncated: 103 more columns]

## Sheet: con-family
family	AA3	CBM11	CBM22	CBM3	CBM30	CBM32	CBM35	CBM37	CBM4	CBM48	CBM51	CBM6	CBM62	CBM67	CBM74	CBM9	CBM91	CE1	CE11	CE12	CE15	CE17	CE19	CE2	CE20	CE3	CE4	CE6	CE7	CE8	CE9	GH1	GH10	GH103	GH104	GH105	GH106	GH109	GH11	GH110	GH112	GH113	GH115	GH116	GH120	GH123	GH125	GH127	GH13
treatment	con	con	con	con	con	con	con	con	con	con	con	con	con	con	con	con	con	con	con	con	con	con	con	con	con	con	con	con	con	con	con	con	con	con	con	con	con	con	con	con	con	con	con	con	con	con	con	con	con
Bacteria_norank	0	0	0	0	0	0.538758	0	0	0	0	0	0.310478	0	0	0	0.126425	0	13.5498	2.1914	0.041131	0.0335843	0	0	0.61219	2.55802	0	0	1.63882	0	0	3.66338	0.33079	13.265	0	0	0.923889	0.364596	5.74002	11.0143	0	0	0	0	0	0.969845	0	0	0	50.4745
Bacteroidaceae	0	0	0	0	0	0	0	0	0	0	0	0	0	0	0	0	0	0	0.957186	0	1.3556	0	0	0	0.174114	0	0	0	0.139043	0.419076	0	0	0.720968	0	0	0.177622	0.400645	0.459872	0	0	0	0	0.439652	0	0.779443	0	0.204144	1.39382	7.58842
Bacteroidales_norank	0	0	0	0	0	0.370052	0	0	0	0	0	0	0	0	0	0	0	0.808755	1.24498	0	0	0	0.583089	0	0.222727	0	0	1.04446	0.459916	0	0	1.58063	0.6442	0	0	1.44826	0	2.58469	0	0	0	0	1.04168	0	0	0	0	0	20.8286
Clostridiaceae	0	0	0	0	0	0	0	0	0.270139	1.18274	0	0.309255	0	0	0	0	0	0	0	0	0.252799	0	0	1.16919	0	0	0.458133	0.318518	0	0	0	65.2503	1.88342	0	0	2.80248	0.725359	0.747194	0.519208	0	0	0	0	0	3.72453	0	1.60614	0.67266	81.3851
Fibrobacteraceae	0	0.536413	0	0	11.3273	0	4.56923	0	1.63008	0	1.63354	0.695022	0	0	0	0	0	0	0	4.63296	7.05702	0	0	0.734891	0.447706	0	0	1.9421	0	0.127176	0	0.483391	27.5708	0	0	0	0	0	2.32065	0	0	0	0	2.00877	0	0	0	0	8.35807
Lachnospiraceae	0	0	0	0.082224	0	0	0	0	0	0.280401	0	0.486924	0	0	0	0.188172	0	0	0.797053	0	7.22188	1.63911	0	0.283205	0	0.312615	1.18463	0	0	0	0.386208	0.500793	3.11055	0	0	1.41061	0	0	0.887621	0	0	0.126621	0.195079	0	3.99019	0	0	0.479153	40.0494
Neocallimastigales	0	0	0	0	0	0	0	0	0	0	0	0	0	0	0	0	0	19.0631	0	0	0.996912	0	0	0.851034	0	0.665829	0	1.64363	0	0	0	14.7726	1.05894	0	0	0	0	0.202899	23.5112	0	0	0	0	0	0.390825	0	0	0	0.495063
Prevotellaceae	0	0	0	0	0	0	0	0	0	0.220186	0	0.176418	0.308569	0	0	0	0.0583343	0.390387	2.31075	1.33957	1.55481	0	0	0.637103	0.736445	0	3.93355	0.35299	0.685155	0.130043	0.963965	50.6727	4.78813	0	0	3.07541	0.148894	1.22054	1.91286	0	0	0	4.13499	0	31.804	0	2.79437	4.02396	18.2328
Ruminococcaceae	0	0	0.622356	0.56097	0	0	0	0.379937	0.704971	0.19816	0	0	0	0	0.446446	0	0	1.36687	0	0	0.564613	0	0	0	0.342158	0.545757	6.46902	0	0	0	0	41.1744	6.22373	0	0	0	0	0	1.68015	0	0	0.101045	0.516239	0	8.97944	0	0	0.162952	28.2107
Spirochaetaceae	0	0	0	0	1.32813	0.334941	0	0	0	0	0	0.442944	0	0	0	0	0	1.79387	0	0	0.258551	0	0	0	28.2891	0	0	0.480302	0	0	0	0.313879	2.75694	0	0	0.188719	1.97886	5.56136	0	0	0	0	0.881357	0	1.76273	0	0	0.423472	14.2147
Others	0.352585	0	0	0	9.25972	0.289941	0	0	0	2.09159	0	0	0	0.0908962	0	0	0	0	7.95266	0.241601	2.15872	0	0	0	1.78488	0	0.875551	3.53674	0.0892922	0.81732	1.91035	5.06092	3.02637	0.476721	4.28142	3.46205	3.08441	2.99459	2.72275	0.25323	0.684921	0	0.17455	0.0614355	0.154794	2.517	0.855587	16.622	60.2647
[truncated: 103 more columns]

## Sheet: endoglucanases
family	treatment	Bacteria_norank	Bacteroidaceae	Bacteroidales_norank	Clostridiaceae	Fibrobacteraceae	Lachnospiraceae	Neocallimastigales	Prevotellaceae	Ruminococcaceae	Spirochaetaceae	Others
GH5	con	9.70128	0.324692	3.07689	40.3515	23.0568	4.34431	16.1158	6.88191	6.80543	5.55286	13.0921
GH9	con	2.1754	0.131994	0.688022	1.87762	10.6334	0.616765	0.751226	0.782798	11.286	1.14399	4.36069
GH44	con	0	0	0	0	0.52564	0	0	0	0.566752	2.85899	1.45297
GH45	con	0	0	0	0	3.68394	0	0	0	0	0	0
GH51	con	1.8507	2.74144	2.60371	3.62316	0.155814	5.33179	0	4.32769	1.82703	3.64425	5.85974
GH8	con	0	0.739732	1.97805	2.3799	2.32387	1.60707	0.943655	0	0.199611	1.30986	0
GH74	con	0.554505	0	0	0	0	0	0	0	2.70046	0	0.331738
GH10	con	13.265	0.720968	0.6442	1.88342	27.5708	3.11055	1.05894	4.78813	6.22373	2.75694	3.02637
GH124	con	0	0	0	0	0	0	0	0	0	0	0
GH48	con	1.25852	0	0	0	0	0	4.86777	0	19.4856	0	0
GH148	con	0	0.677183	0	0	0	0	0	0	0	0	0
GH5	3-NOP	12.1256	1.17754	3.42354	51.0584	45.8757	6.71919	34.5258	11.7952	4.77427	8.69074	11.6194
GH9	3-NOP	6.60448	0.160081	1.66415	1.57397	25.2795	0.804819	7.11401	1.14074	2.78877	2.45518	4.94327
GH44	3-NOP	0	0	0	0	1.61929	0	0	0	0.627089	2.72719	1.75601
GH45	3-NOP	0	0	0	0	6.65308	0	0	0	0	0	0
GH51	3-NOP	2.87486	3.23161	4.00743	3.29444	0.361612	5.37779	0	5.41847	1.49494	2.97509	5.4858
GH8	3-NOP	0	1.27647	3.1005	2.02537	4.15508	1.6207	0.887489	0	0.151364	1.85455	0
GH74	3-NOP	0.562526	0	0	0	0	0	0	0	5.26299	0	0.333865
GH10	3-NOP	14.7081	1.48376	0.962608	1.53897	30.1203	2.47582	0.862789	6.05749	5.0442	2.76953	4.82254
GH124	3-NOP	0	0	0	0	0	0	0	0	0	0	0
GH48	3-NOP	1.12518	0	0	0	0	0	4.81542	0	16.6224	0	0
GH148	3-NOP	0	0.293606	0	0	0	0	0	0	0	0	0
treatment	Bacteria_norank	Bacteroidaceae	Clostridiaceae	Fibrobacteraceae	Lachnospiraceae	Neocallimastigales	Others	Prevotellaceae	Bacteroidales_norank	Ruminococcaceae	Spirochaetaceae
3-NOP	38.0007	7.62306	59.4911	114.064	16.9983	48.2055	28.9609	24.4119	13.1582	36.766	21.4723
con	28.8054	5.33601	50.1156	67.9503	15.0105	23.7374	28.1236	16.7805	8.99088	49.0946	17.2669
sum	66.8061	12.9591	109.607	182.015	32.0088	71.9429	57.0845	41.1924	22.1491	85.8606	38.7392

## Sheet: exoglucanases
family	treatment	treatment1	Bacteria_norank	Bacteroidaceae	Bacteroidales_norank	Clostridiaceae	Fibrobacteraceae	Lachnospiraceae	Neocallimastigales	Others	Prevotellaceae	Ruminococcaceae	Spirochaetaceae
GH48	GH48	con	1.25852	0	0	0	0	0	4.86777	0	0	19.4856	0
GH5	GH5	con	9.70128	0.324692	3.07689	40.3515	23.0568	4.34431	16.1158	13.0921	6.88191	6.80543	5.55286
GH51	GH51	con	1.8507	2.74144	2.60371	3.62316	0.155814	5.33179	0	5.85974	4.32769	1.82703	3.64425
GH9	GH9	con	2.1754	0.131994	0.688022	1.87762	10.6334	0.616765	0.751226	4.36069	0.782798	11.286	1.14399
GH48	GH48	3-NOP	1.12518	0	0	0	0	0	4.81542	0	0	16.6224	0
GH5	GH5	3-NOP	12.1256	1.17754	3.42354	51.0584	45.8757	6.71919	34.5258	11.6194	11.7952	4.77427	8.69074
GH51	GH51	3-NOP	2.87486	3.23161	4.00743	3.29444	0.361612	5.37779	0	5.4858	5.41847	1.49494	2.97509
GH9	GH9	3-NOP	6.60448	0.160081	1.66415	1.57397	25.2795	0.804819	7.11401	4.94327	1.14074	2.78877	2.45518
	treatment1	Bacteria_norank	Bacteroidaceae	Clostridiaceae	Fibrobacteraceae	Lachnospiraceae	Neocallimastigales	Prevotellaceae	Ruminococcaceae	Spirochaetaceae	Bacteroidales_norank	Others
	3-NOP	22.7301	4.56923	55.9268	71.5168	12.9018	46.4552	18.3544	25.6804	14.121	9.09512	22.0485
	con	14.9859	3.19813	45.8523	33.846	10.2929	21.7348	11.9924	39.404	10.3411	6.36862	23.3125

## Sheet: β-glucosidases
family	treatment	treatment1	Bacteria_norank	Bacteroidaceae	Bacteroidales_norank	Clostridiaceae	Fibrobacteraceae	Lachnospiraceae	Neocallimastigales	Prevotellaceae	Ruminococcaceae	Spirochaetaceae	Others
GH2	GH2	con	14.7618	4.36423	9.10416	6.10803	1.40732	2.26967	0	6.23326	2.51096	0.596839	8.1682
GH5	GH5	con	9.70128	0.324692	3.07689	40.3515	23.0568	4.34431	16.1158	6.88191	6.80543	5.55286	13.0921
GH116	GH116	con	0	0	0	0	2.00877	0	0	0	0	0	0.0614355
GH3	GH3	con	32.3322	7.49225	15.2659	25.1916	3.05588	30.4456	5.15983	11.5474	24.6443	3.74908	47.8983
GH1	GH1	con	0.33079	0	1.58063	65.2503	0.483391	0.500793	14.7726	50.6727	41.1744	0.313879	25.06092033333333
GH2	GH2	3-NOP	5.71016	8.50002	4.5793	5.38582	5.15752	2.74869	0	8.26798	2.80374	0.495792	8.06713
GH5	GH5	3-NOP	12.1256	1.17754	3.42354	51.0584	45.8757	6.71919	34.5258	11.7952	4.77427	8.69074	11.6194
GH116	GH116	3-NOP	0	0	0	0	0.717968	0	0	0	0	0	0.0516468
GH3	GH3	3-NOP	32.274	14.9244	18.2844	19.8257	4.37644	22.5565	4.44953	14.8094	18.8923	3.73871	53.5823
GH1	GH1	3-NOP	0.280044	0	1.68665	51.6274	0.74407	0.345674	12.5361	0	35.7723	0.690131	23.0517
treatment1	Bacteria_norank	Bacteroidaceae	Clostridiaceae	Fibrobacteraceae	Lachnospiraceae	Neocallimastigales	Others	Prevotellaceae	Bacteroidales_norank	Ruminococcaceae	Spirochaetaceae
3-NOP	50.3898	24.602	127.897	56.8717	32.3701	51.5114	96.3723	34.8725	27.9739	62.2426	13.6154
con	57.1261	12.1812	136.901	30.0121	37.5604	36.0482	69.22	75.3352	29.0275	75.1351	10.2127
总计	107.516	36.7832	264.799	86.8838	69.9305	87.5597	165.592	110.208	57.0014	137.378	23.828

## Sheet: Debranching enzymes
treatment	treatment1	Bacteria_norank	Bacteroidaceae	Bacteroidales_norank	Clostridiaceae	Fibrobacteraceae	Lachnospiraceae	Neocallimastigales	Others	Prevotellaceae	Ruminococcaceae	Spirochaetaceae
CE1	con	13.5498	0	0.808755	0	0	0	19.0631	0	0.390387	1.36687	1.79387
CE12	con	0.041131	0	0	0	4.63296	0	0	0.241601	1.33957	0	0
CE15	con	0.0335843	1.3556	0	0.252799	7.05702	7.22188	0.996912	2.15872	1.55481	0.564613	0.258551
CE2	con	0.61219	0	0	1.16919	0.734891	0.283205	0.851034	0	0.637103	0	0
CE3	con	0	0	0	0	0	0.312615	0.665829	0	0	0.545757	0
CE4	con	0	0	0	0.458133	0	1.18463	0	0.875551	3.93355	6.46902	0
CE5	con	0	0	0	0	0	0	0	0	0	0	0
CE6	con	1.63882	0	1.04446	0.318518	1.9421	0	1.64363	3.53674	0.35299	0	0.480302
CE7	con	0	0.139043	0.459916	0	0	0	0	0.0892922	0.685155	0	0
GH1	con	0.33079	0	1.58063	65.2503	0.483391	0.500793	14.7726	25.0609	50.6727	41.1744	0.313879
GH110	con	0	0	0	0	0	0	0	0.25323	0	0	0
GH113	con	0	0	0	0	0	0.126621	0	0	0	0.101045	0
GH159	con	0	0	0	0	0	0	0	0	0	0	0
GH2	con	14.7618	4.36423	9.10416	6.10803	1.40732	2.26967	0	8.1682	6.23326	2.51096	0.596839
GH27	con	1.0803	0.653622	0.145823	0.184708	0	0	0	6.02271	1.91871	2.1099	0.837278
GH31	con	4.86277	4.52679	15.1489	3.91023	0	8.00583	0.498729	18.2768	4.56748	8.72399	11.0577
GH36	con	0.952113	2.91161	0	1.15793	0	2.21138	0	5.83311	5.80343	10.0264	4.96236
GH4	con	10.0275	0	0.455128	3.30784	0	0.713127	0	1.7456	5.3937	1.14412	0.545384
GH5	con	9.70128	0.324692	3.07689	40.3515	23.0568	4.34431	16.1158	13.0921	6.88191	6.80543	5.55286
GH51	con	1.8507	2.74144	2.60371	3.62316	0.155814	5.33179	0	5.85974	4.32769	1.82703	3.64425
GH57	con	51.5754	10.0122	14.2288	0	1.39075	0	0	10.5588	2.27127	1.95665	2.12191
GH67	con	0.814758	0.546723	0.284822	0.493252	0	0.466479	0	0.431315	1.10602	0	0
GH97	con	5.3521	2.97841	3.3027	0.184549	0	0	0	2.80896	2.34329	0	0
CE1	3-NOP	10.5867	0	1.5944	0	0	0	8.18539	0	0.646247	0.42212	1.29003
CE12	3-NOP	0.0806927	0	0	0	5.89653	0	0	0.26454	0.751846	0	0
CE15	3-NOP	0.0701428	1.8472	0	0.326035	21.2127	2.13748	1.55055	3.62038	3.358	0.308269	0.247811
CE2	3-NOP	0.51635	0	0	1.44913	1.49929	0.273637	0.748197	0	0.888432	0	0
CE3	3-NOP	0	0	0	0	0	0.297637	0.645951	0	0	0.148153	0
CE4	3-NOP	0	0	0	0.484803	0	0.917944	14.0194	0.973991	3.52637	0	0
CE5	3-NOP	0	0	0	0	0	0	0	0	0	0	0
CE6	3-NOP	1.81577	0	1.383	0.309432	3.38066	0	2.13181	5.00585	0.415918	0	0.794457
CE7	3-NOP	0	0.517149	1.14222	0	0	0	0	0.009061	1.24618	0	0
GH1	3-NOP	0.280044	0	1.68665	51.6274	0.74407	0.345674	12.5361	23.0517	0	35.7723	0.690131
GH110	3-NOP	0	0	0	0	0	0	0	0.122023	0	0	0
GH113	3-NOP	0	0	0	0	0	0.13282	0	0	0	0.112066	0
GH159	3-NOP	0	0	0	0	0	0	0	0	0	0	0
GH2	3-NOP	5.71016	8.50002	4.5793	5.38582	5.15752	2.74869	0	8.06713	8.26798	2.80374	0.495792
GH27	3-NOP	0.801071	0.785124	0.113212	0.172426	0	0	0	5.52066	1.54982	1.70493	2.79154
GH31	3-NOP	3.57574	2.46263	11.4161	3.61434	0	6.12636	5.70319	19.0988	5.96711	5.04561	7.35552
GH36	3-NOP	0.875491	2.94992	0	0.943802	0	2.06524	1.83559	5.77665	5.01202	6.21413	4.24323
GH4	3-NOP	9.6329	0	0.73016	3.55745	0	0.726118	0	3.42153	8.10252	0.823382	0.550816
GH5	3-NOP	12.1256	1.17754	3.42354	51.0584	45.8757	6.71919	34.5258	11.6194	11.7952	4.77427	8.69074
GH51	3-NOP	2.87486	3.23161	4.00743	3.29444	0.361612	5.37779	0	5.4858	5.41847	1.49494	2.97509
GH57	3-NOP	51.3599	11.3632	7.64371	0	2.77167	0	3.75302	10.368	4.58183	0	3.15087
GH67	3-NOP	1.72745	1.33781	0.426021	0.379219	0	0.251209	0	0.405438	1.91351	0	0
GH97	3-NOP	3.60377	2.46056	4.22496	0.168374	0	0	0	3.25485	2.5829	0	0
treatment1	Bacteria_norank	Bacteroidaceae	Clostridiaceae	Fibrobacteraceae	Lachnospiraceae	Neocallimastigales	Others	Prevotellaceae	Ruminococcaceae	Bacteroidales_norank	Spirochaetaceae
3-NOP	105.637	36.6327	122.771	86.8997	28.1198	85.635	106.066	66.0243	59.6239	42.3707	33.276
con	117.185	30.5544	126.77	40.861	32.9723	54.6076	105.013	100.413	85.3262	52.2446	32.1651

## Sheet: Endoxyianases
treatment	treatment1	Bacteria_norank	Bacteroidaceae	Bacteroidales_norank	Clostridiaceae	Fibrobacteraceae	Lachnospiraceae	Neocallimastigales	Others	Prevotellaceae	Ruminococcaceae	Spirochaetaceae
GH43	con	7.25797	7.4021	21.8444	3.81291	3.24105	38.0119	3.17031	36.6158	41.2566	31.4626	3.46296
GH5	con	9.70128	0.324692	3.07689	40.3515	23.0568	4.34431	16.1158	13.0921	6.88191	6.80543	5.55286
GH51	con	1.8507	2.74144	2.60371	3.62316	0.155814	5.33179	0	5.85974	4.32769	1.82703	3.64425
GH10	con	13.265	0.720968	0.6442	1.88342	27.5708	3.11055	1.05894	3.02637	4.78813	6.22373	2.75694
GH30	con	0	0.0800388	0	0	3.1726	0	0.207152	0.31708	1.28728	0.898034	0
GH8	con	0	0.739732	1.97805	2.3799	2.32387	1.60707	0.943655	0	0	0.199611	1.30986
GH141	con	0	0.069461	0	0	0	0	0	0	0.335971	0.190961	0
GH11	con	11.0143	0	0	0.519208	2.32065	0.887621	23.5112	2.72275	1.91286	1.68015	0
GH98	con	0	0	0	0	0	0	0	0	0.645149	0	0
GH48	con	1.25852	0	0	0	0	0	4.86777	0	0	19.4856	0
GH43	3-NOP	6.36647	7.57113	15.2669	4.3663	5.08104	29.5187	4.27954	29.2892	25.4362	9.20063	3.41545
GH5	3-NOP	12.1256	1.17754	3.42354	51.0584	45.8757	6.71919	34.5258	11.6194	11.7952	4.77427	8.69074
GH51	3-NOP	2.87486	3.23161	4.00743	3.29444	0.361612	5.37779	0	5.4858	5.41847	1.49494	2.97509
GH10	3-NOP	14.7081	1.48376	0.962608	1.53897	20.1203	2.47582	0.862789	4.82254	6.05749	5.0442	2.76953
GH30	3-NOP	0	0.14255	0	0	4.10182	0	0.189766	0.229135	0.789401	1.02566	0
GH8	3-NOP	0	1.27647	3.1005	2.02537	4.15508	1.6207	0.887489	0	0	0.151364	1.85455
GH141	3-NOP	0	0.212313	0	0	0	0	0	0	0.971041	0.0546748	0
GH11	3-NOP	3.85815	0	0	0.503204	3.78273	0.635115	21.6073	1.51957	1.11179	0.29764	0
GH98	3-NOP	0	0	0	0	0	0	0	0	0.739475	0	0
GH48	3-NOP	1.12518	0	0	0	0	0	4.81542	0	0	16.6224	0
treatment1	Bacteria_norank	Bacteroidaceae	Clostridiaceae	Fibrobacteraceae	Lachnospiraceae	Neocallimastigales	Others	Prevotellaceae	Spirochaetaceae	Ruminococcaceae	Bacteroidales_norank
3-NOP	41.0583	15.0954	62.7867	83.4782	46.3473	67.168	52.9656	52.3191	19.7054	38.6658	26.761
con	44.3478	12.0784	52.5701	61.8416	53.2933	49.8748	61.6338	61.4356	16.7269	68.7732	30.1473
总计	85.4061	27.1738	115.357	145.32	99.6406	117.043	114.599	113.755	36.4322	107.439	56.9083

## Sheet: Exoxylanases
treatment	treatment1	Bacteria_norank	Bacteroidaceae	Bacteroidales_norank	Clostridiaceae	Fibrobacteraceae	Lachnospiraceae	Neocallimastigales	Others	Prevotellaceae	Ruminococcaceae	Spirochaetaceae
GH43	con	7.25797	7.4021	21.8444	3.81291	3.24105	38.0119	3.17031	36.6158	41.2566	31.4626	3.46296
GH3	con	32.3322	7.49225	15.2659	25.1916	3.05588	30.4456	5.15983	47.8983	11.5474	24.6443	3.74908
GH2	con	14.7618	4.36423	9.10416	6.10803	1.40732	2.26967	0	8.1682	6.23326	2.51096	0.596839
GH5	con	9.70128	0.324692	3.07689	40.3515	23.0568	4.34431	16.1158	13.0921	6.88191	6.80543	5.55286
GH51	con	1.8507	2.74144	2.60371	3.62316	0.155814	5.33179	0	5.85974	4.32769	1.82703	3.64425
GH30	con	0	0.0800388	0	0	3.1726	0	0.207152	0.31708	1.28728	0.898034	0
GH1	con	0.33079	0	1.58063	65.2503	0.483391	0.500793	14.7726	25.06092033333333	50.6727	41.1744	0.313879
GH39	con	0	0.0601735	0	0	0	5.14519	0	8.11574	0	0	0.587206
GH120	con	0.969845	0.779443	0	3.72453	0	3.99019	0.390825	0.154794	31.804	8.97944	1.76273
GH54	con	1.87655	0.221553	0.273177	0	0	0	0	1.32987	0	0	0
GH116	con	0	0	0	0	2.00877	0	0	0.0614355	0	0	0
GH43	3-NOP	6.36647	7.57113	15.2669	4.3663	5.08104	29.5187	4.27954	29.2892	25.4362	9.20063	3.41545
GH3	3-NOP	32.274	14.9244	18.2844	19.8257	4.37644	22.5565	4.44953	53.5823	14.8094	18.8923	3.73871
GH2	3-NOP	5.71016	8.50002	4.5793	5.38582	5.15752	2.74869	0	8.06713	8.26798	2.80374	0.495792
GH5	3-NOP	12.1256	1.17754	3.42354	51.0584	45.8757	6.71919	34.5258	11.6194	11.7952	4.77427	8.69074
GH51	3-NOP	2.87486	3.23161	4.00743	3.29444	0.361612	5.37779	0	5.4858	5.41847	1.49494	2.97509
GH30	3-NOP	0	0.14255	0	0	4.10182	0	0.189766	0.229135	0.789401	1.02566	0
GH1	3-NOP	0.280044	0	1.68665	51.6274	0.74407	0.345674	12.5361	23.0517	0	35.7723	0.690131
GH39	3-NOP	0	0.00699067	0	0	0	11.4316	0	5.51124	0	0	0.749417
GH120	3-NOP	0.837279	0.578779	0	4.24429	0	4.43821	1.62163	10.5522	0	1.63069	2.49411
GH54	3-NOP	1.761	0.449055	0.179574	0	0	0	0	0.805848	0	0	0
GH116	3-NOP	0	0	0	0	0.717968	0	0	0.0516468	0	0	0
treatment1	Bacteria_norank	Bacteroidaceae	Clostridiaceae	Fibrobacteraceae	Lachnospiraceae	Neocallimastigales	Others	Prevotellaceae	Ruminococcaceae	Spirochaetaceae	Bacteroidales_norank
3-NOP	62.2294	36.5821	139.802	66.4161	83.1363	57.6024	148.246	66.5166	75.5945	23.2494	47.4278
con	69.0812	23.4659	148.062	36.5816	90.0395	39.8165	121.613	154.011	118.302	19.6698	53.7489
总计	131.311	60.048	287.864	102.998	173.176	97.4189	269.859	220.527	193.897	42.9192	101.177

## Sheet: CBM
family	treatment	Bacteria_norank	Bacteroidaceae	Bacteroidales_norank	Clostridiaceae	Fibrobacteraceae	Lachnospiraceae	Neocallimastigales	Prevotellaceae	Ruminococcaceae	Spirochaetaceae	Others
CBM11	3-NOP	0	0	0	0	0.295421	0	0	0	0	0	0
CBM11	con	0	0	0	0	0.536413	0	0	0	0	0	0
CBM22	3-NOP	0	0	0	0	0	0	0	0	0.547463	0	0
CBM22	con	0	0	0	0	0	0	0	0	0.622356	0	0
CBM3	3-NOP	0	0	0	0	0	0.00489683	0	0	0.345313	0	0
CBM3	con	0	0	0	0	0	0.082224	0	0	0.56097	0	0
CBM30	3-NOP	0	0	0	0	27.778	0	0	0	0	1.0376	0.689249
CBM30	con	0	0	0	0	11.3273	0	0	0	0	1.32813	9.25972
CBM32	3-NOP	0.510647	0	0.334242	0	0	0	0	0	0	0.652658	0.336861
CBM32	con	0.538758	0	0.370052	0	0	0	0	0	0	0.334941	0.289941
CBM35	3-NOP	0	0	0	0	12.5764	0	0	0	0	0	0
CBM35	con	0	0	0	0	4.56923	0	0	0	0	0	0
CBM37	3-NOP	0	0	0	0	0	0	0	0	0.299124	0	0
CBM37	con	0	0	0	0	0	0	0	0	0.379937	0	0
CBM4	3-NOP	0	0	0	0.434957	5.66098	0	0	0	0.706545	0	0
CBM4	con	0	0	0	0.270139	1.63008	0	0	0	0.704971	0	0
CBM48	3-NOP	0	0	0	0.969429	0	0.273943	0	0	0.125154	0	1.73656
CBM48	con	0	0	0	1.18274	0	0.280401	0	0.220186	0.19816	0	2.09159
CBM51	3-NOP	0	0	0	0	3.89551	0	0	0	0	0	0
CBM51	con	0	0	0	0	1.63354	0	0	0	0	0	0
CBM6	3-NOP	0.478919	0	0	0.209296	0.946567	0.538628	0	0.284255	0	0.66037	0
CBM6	con	0.310478	0	0	0.309255	0.695022	0.486924	0	0.176418	0	0.442944	0
CBM62	3-NOP	0	0	0	0	0	0	0	0.353534	0	0	0
CBM62	con	0	0	0	0	0	0	0	0.308569	0	0	0
CBM67	3-NOP	0	0	0	0	0	0	0	0	0	0	0.100593
CBM67	con	0	0	0	0	0	0	0	0	0	0	0.0908962
CBM74	3-NOP	0	0	0	0	0	0	0	0	0.402016	0	0
CBM74	con	0	0	0	0	0	0	0	0	0.446446	0	0
CBM9	3-NOP	0.0572245	0	0	0	0	0.452919	0	0	0	0	0
CBM9	con	0.126425	0	0	0	0	0.188172	0	0	0	0	0
CBM91	3-NOP	0	0	0	0	0	0	0	0.163744	0	0	0
CBM91	con	0	0	0	0	0	0	0	0.0583343	0	0	0

[truncated: 1 more sheets: GT]
