# Supplementary material for: Metatranscriptomic changes in the propionate pathway and carbohydrate enzyme revealed the rebalancing mechanism of rumen microbiota after CH4 inhibition by 3-NOP
Source: Research Square preprint supplement (doi:10.21203/rs.3.rs-7121971/v1), 2025-08-11
Supplement: Supplementary file 6 [file 832fd56c4a5fba6e5ed0a534.xlsx]

## Sheet: Sheet1
Pathways	EC	Name	ID	con	con	con	con	con	con	3nop	3nop	3nop	3nop	3nop	3nop	gene	3nop	con	sem	p-value
CH4	EC:2.8.4.1	mcrA	K00399	1650.38	1755.63	1488.48	1857.6	2150.17	1631.76	764.65	1275.25	878.1	1197.98	1106.4	356.4	mcrA; methyl-coenzyme M reductase alpha subunit [EC:2.8.4.1]	929.797	1755.67	232.967	0.0039
CH4	EC:1.2.7.12	fwdB, fmdB	K00201	204.66	230.35	180.35	276.45	344.64	230.5	132.35	222.43	160.7	223.19	236.16	96.1	fwdB, fmdB; formylmethanofuran dehydrogenase subunit B [EC:1.2.7.12]	178.488	244.492	47.3515	0.1093
CH4	EC:1.5.98.1	mtd	K00319	1098.08	1145.78	990.7	1170.71	1305.61	1163.53	595.64	841.68	664.86	665.63	664.17	338.02	mtd; methylenetetrahydromethanopterin dehydrogenase [EC:1.5.98.1]	628.333	1145.73	109.007	0.0039
CH4	EC:1.5.98.2	mer	K00320	1467.29	1689.03	1503.84	1617.14	1674.16	1703.24	1316.16	1522.25	1545.26	1228.55	1403.07	783.35	mer; 5,10-methylenetetrahydromethanopterin reductase [EC:1.5.98.2]	1299.77	1609.12	155.502	0.025
CH4	[EC:1.17.98.3 1.8.98.6]	fdhA	K22516	168.18	243.77	197.52	273.95	332.74	233.41	203.17	262.73	315.51	282.02	369.31	60.1	fdhA; formate dehydrogenase (coenzyme F420) alpha subunit [EC:1.17.98.3 1.8.98.6]	248.807	241.595	67.5896	0.5218
Pyruvate->Malate	EC:1.1.1.37	mdh	K00024	35.87	25.98	22.8	34.35	34.61	30.81	95.3	55.43	132.55	82.83	173.26	183.25	mdh; malate dehydrogenase [EC:1.1.1.37]	120.437	30.7367	23.1005	0.0039
Fumarate->Propionate	EC:1.3.5.1 1.3.5.4	sdhA, frdA	K00239	46.67	35.1	29.24	49.13	57.48	38.35	47.62	51.41	55.96	69.51	72.05	64.63	sdhA, frdA; succinate dehydrogenase / fumarate reductase, flavoprotein subunit [EC:1.3.5.1 1.3.5.4]	60.1967	42.6617	8.3	0.025
Pyruvate->Lactate	EC:1.1.1.27	LDH, ldh	K00016	34.46	27.95	23.68	25.74	26.56	25.04	29.53	33.16	36.58	36.61	40.59	34.93	LDH, ldh; L-lactate dehydrogenase [EC:1.1.1.27]	35.2333	27.2383	3.0785	0.0104
Pyruvate->Lactate	Dld	dld	K03778	5.39	8.57	9.9	10.3	10.9	10.97	13.6	10.58	21.1	10.82	25.47	19.74	ldhA; D-lactate dehydrogenase [EC:1.1.1.28]	16.885	9.3383	3.3627	0.025
Lactate->Propionate	EC:1.3.8.1	ACADS, bcd	K00248	192.11	217.82	189.94	235.85	262.71	196.37	150.77	176.9	194.53	212.86	280.74	115.79	ACADS, bcd; butyryl-CoA dehydrogenase [EC:1.3.8.1]	188.598	215.8	34.9336	0.2623
Lactate->Propionate	EC:1.3.1.-	acuI	K19745	1.05	0.74	0.92	0.97	3.58	1.03	1	1.08	1.26	1.02	2.06	1.92	acuI; acrylyl-CoA reductase (NADPH) [EC:1.3.1.-]	1.39	1.3817	0.6362	0.2002
AcetylCoA->Butyrate	EC:1.1.1.36	phbB	K00023	1.06	1.28	1.04	1.07	3.68	1.77	1.52	1.82	1.75	1.65	1.76	2.79	phbB; acetoacetyl-CoA reductase [EC:1.1.1.36]	1.8817	1.65	0.6081	0.2002
AcetylCoA->Butyrate	EC:1.1.1.157	paaH, hbd, fadB, mmgB	K00074	262.01	252.25	230.07	263.95	284.92	235.94	209.31	205.15	276.9	241.19	370.29	171.39	paaH, hbd, fadB, mmgB; 3-hydroxybutyryl-CoA dehydrogenase [EC:1.1.1.157]	245.705	254.857	37.0705	0.4233
AcetylCoA->Butyrate	EC:1.3.1.9 1.3.1.44	fabV, ter	K00209	3.04	3.54	2.95	3.94	7.12	4.56	6.46	6.38	7.93	8.31	8.95	7.82	fabV, ter; enoyl-[acyl-carrier protein] reductase / trans-2-enoyl-CoA reductase (NAD+) [EC:1.3.1.9 1.3.1.44]	7.6417	4.1917	1.053	0.0104
Wood-Ljungdahl	EC:1.2.7.4	cooS, acsA	K00198	4.93	6.33	5.89	6.36	5.7	5.16	8.48	8.63	9.46	7.83	16.45	4.42	cooS, acsA; anaerobic carbon-monoxide dehydrogenase catalytic subunit [EC:1.2.7.4]	5.7283	9.2117	1.8559	0.0547
Wood-Ljungdahl	EC:1.2.7.4	codH, cdhA	K00192	8.26	9.49	9.85	11.12	9.76	8.42	13.55	12.55	18.97	12.58	31.76	8.89	codH, cdhA	9.4833	16.3833	3.7778	0.025
Wood-Ljungdahl	EC:1.2.7.4	cdhB	K00195	0.69	0.59	0.31	0.75	0.51	0.39	0.03	0	0	0.03	0	0.03	cdhB; anaerobic carbon-monoxide dehydrogenase, CODH/ACS complex subunit epsilon	0.54	0.015	0.0763	0.0035
Wood-Ljungdahl	EC:1.17.1.10	fdhA	K05299	2.87	3.67	3.06	3.54	4.37	2.85	3.94	3.27	6.62	4.58	8.9	1.55	fdhA; formate dehydrogenase (NADP+) alpha subunit [EC:1.17.1.10]	3.3933	4.81	1.3019	0.2002
Wood-Ljungdahl	EC:1.5.1.5 3.5.4.9	folD	K01491	39.77	31.05	31.82	43.5	45.66	40.6	37.96	43.72	37.41	53.09	46.93	53.95	folD; methylenetetrahydrofolate dehydrogenase (NADP+) / methenyltetrahydrofolate cyclohydrolase [EC:1.5.1.5 3.5.4.9]	38.7333	45.51	5.3878	0.1495
Wood-Ljungdahl	EC:1.5.1.54	metF, MTHFR	K00297	23.01	19.46	18.98	23.04	21.4	20.2	30.75	27.39	36.64	28.91	40.43	29.73	metF, MTHFR; methylenetetrahydrofolate reductase (NADPH) [EC:1.5.1.20]	21.015	32.3083	2.7957	0.0039
Wood-Ljungdahl	EC:2.3.1.169	acsB	K14138	3.94	4.86	4.55	5.6	5.55	5.19	9.44	7.46	12.98	8.31	22.97	5.09	acsB; acetyl-CoA synthase [EC:2.3.1.169]	4.9483	11.0417	2.8697	0.0163
NO3-	EC:1.7.5.1 1.7.99.-	narG, narZ, nxrA	K00370	0.5	0.28	0.15	0.2	1.37	0.32	0.38	0.29	0.32	0.54	0.63	0.66	narG, narZ, nxrA; nitrate reductase / nitrite oxidoreductase, alpha subunit [EC:1.7.5.1 1.7.99.-]	4.81	3.3933	1.3019	0.2002
NO3-	EC:1.9.6.1	napA	K02567	0.44	0.22	0.23	0.33	0.91	0.31	0.22	0.17	0.25	0.25	0.32	0.11	napA; nitrate reductase (cytochrome) [EC:1.9.6.1]	45.51	38.7333	5.3878	0.1495
NO3-	EC:1.7.2.2	nrfA	K03385	115.28	173.04	154.85	160.74	173.86	157.17	151.9	154.02	172.01	151.46	198.52	97.97	nrfA; nitrite reductase (cytochrome c-552) [EC:1.7.2.2]	32.3083	21.015	2.7957	0.0039
NO3-	EC:1.18.6.1	nifH	K02588	1.15	0.93	0.92	0.61	0.61	0.81	0.96	1.04	1.15	0.87	1.6	1.42	nifH; nitrogenase iron protein NifH	11.0417	4.9483	2.8697	0.0163
MCP	EC:1.4.1.2	gudB, rocG	K00260	0	0	0	0	0	0	0.15	0	0.15	0	0.37	0.05	gudB, rocG; glutamate dehydrogenase [EC:1.4.1.2]	0.47	0.47	0.2523	0.229
MCP	EC:1.4.1.4	E1.4.1.4, gdhA	K00262	2059.29	1879.97	1801.62	2008.52	2222.42	1825.14	1115.9	1185.76	1379.56	1357.06	1719.24	877.92	E1.4.1.4, gdhA; glutamate dehydrogenase (NADP+) [EC:1.4.1.4]	1272.57	1966.16	182.284	0.0039
MCP	EC:1.4.1.13	gltB	K00265	0.88	0.82	0.67	0.73	1.92	0.78	0.76	1.1	0.8	1.21	1.24	1.13	gltB; glutamate synthase (NADPH) large chain [EC:1.4.1.13]	154.313	155.823	22.2274	0.4233
MCP	EC:1.4.1.13	gltD	K00266	78.56	66.22	60.56	77.53	82.23	63.25	55.54	61.67	62.86	76.32	80.46	60.36	gltD; glutamate synthase (NADPH) small chain [EC:1.4.1.13]	1.1733	0.8383	0.2004	0.0446
SO4 2-	EC:1.8.99.2	aprA	K00394	44.39	91.62	68.5	78.42	93.13	66.62	43.36	62.08	50.02	72.94	70.11	24.49	aprA; adenylylsulfate reductase, subunit A [EC:1.8.99.2]	53.8333	73.78	14.9228	0.1093
SO4 2-	EC:1.8.99.5	dsrA	K11180	10.51	21.11	14.29	19.58	28.55	16.49	15.15	18.75	19.03	24.06	30.48	10.43	dsrA; dissimilatory sulfite reductase alpha subunit [EC:1.8.99.5]	19.65	18.4217	5.3937	0.8728
SO4 2-	EC:1.8.99.5	dsrB	K11181	11.5	22.92	16.02	24.5	27.25	18.21	19.05	20.55	21.02	26.38	29.87	12.21	dsrB; dissimilatory sulfite reductase beta subunit [EC:1.8.99.5]	21.5133	20.0667	4.8974	0.631
SO4 2-	EC:1.8.1.2	cysJ	K00380	0.08	0.03	0.16	0.05	0.41	0.09	0.12	0.03	0.08	0.07	0.15	0.1	cysJ; sulfite reductase (NADPH) flavoprotein alpha-component [EC:1.8.1.2]	0.0917	0.1367	0.0746	0.8723
SO4 2-	Asr	asrA	K16950	3.48	5.7	4.94	6.01	6.49	5.25	3.5	5.02	5.06	4.11	6.9	1.29	asrA; anaerobic sulfite reductase subunit A	4.3133	5.3117	1.1949	0.3367
SO4 2-	EC:1.8.5.3	dmsA	K07306	24.52	34.92	30.22	28.62	32.01	24.06	12.19	20.2	15.32	17.01	17.46	3.95	dmsA; anaerobic dimethyl sulfoxide reductase subunit A [EC:1.8.5.3]	14.355	29.0583	4.0772	0.0039
