# Supplementary material for: Metatranscriptomic changes in the propionate pathway and carbohydrate enzyme revealed the rebalancing mechanism of rumen microbiota after CH4 inhibition by 3-NOP
Source: Research Square preprint supplement (doi:10.21203/rs.3.rs-7121971/v1), 2025-08-11
Supplement: Supplementary file 8 [file d6024f0ca0f3a4519d748a21.xlsx]

## Sheet: 古菌pcoa
gene_id	CON1	CON2	CON3	CON4	CON5	CON6	3-NOP1	3-NOP2	3-NOP3	3-NOP4	3-NOP5	3-NOP6
g__Methanobrevibacter	1107742	1699712	1356611	1809534	1416700	1355639	713397	864727	890962	944361	1228204	764773
g__Methanosphaera	43348	81228	62625	101118	52492	53047	13714	25217	16932	31987	44660	19966
g__Methanobacterium	3640	6006	4551	8370	4620	4984	3226	3321	3835	4620	7358	3122
g__Methanothermobacter	705	1144	1077	1038	1038	954	375	610	341	475	455	488
g__Methanothermus	109	149	143	161	161	227	162	171	294	156	438	156
g__Methanococcus	2400	2789	2387	3275	3670	2016	1359	1868	1525	1874	1775	1513
g__Methanothermococcus	98	84	81	76	125	70	70	74	60	92	75	57
g__Methanocaldococcus	470	583	505	658	684	617	474	537	564	562	747	437
g__Methanotorris	33	61	46	63	86	76	76	74	58	83	93	78
g__Methanoplanus	43967	35344	33596	55022	42000	51465	22897	23974	18177	51346	86926	72210
g__Methanolacinia	31447	33595	34704	46329	44249	83155	29929	23870	21109	42838	70434	129653
g__Methanoculleus	19402	26527	21132	49490	27146	43303	16573	16003	11927	39706	78133	51764
g__Methanofollis	505	367	352	491	416	643	274	285	266	468	691	940
g__Methanoregula	3882	2314	2233	3692	2810	2995	1938	1840	1687	3472	4871	4419
g__Methanosphaerula	579	396	364	579	455	624	346	463	357	728	1272	895
g__Methanolinea	225	197	204	245	294	607	230	188	221	219	338	1493
g__Methanospirillum	778	404	453	682	539	759	418	527	456	811	1586	908
g__Methanocorpusculum	713	376	378	588	531	715	372	440	337	630	952	1152
g__Methanosarcina	6904	9567	9040	10997	10062	12116	7658	5599	5101	10456	7415	17527
g__Methanomethylovorans	2408	3768	3244	9285	3328	5698	1724	2240	1799	9799	20002	8130
g__Methanococcoides	631	877	740	1637	632	507	289	329	342	1491	1561	941
g__Methanohalobium	119	142	131	196	153	69	65	77	72	166	200	108
g__Methanohalophilus	90	99	126	107	110	148	77	53	82	109	135	229
g__Methanolobus	59	37	29	75	56	64	52	44	57	67	129	91
g__Methanosalsum	34	11	16	34	22	20	15	18	29	34	31	30
g__Methanothrix	892	1377	824	1683	740	551	474	371	463	1042	1048	832
g__Methanocella	550	357	341	468	420	610	295	260	311	521	800	835
g__Halorubrum	253	180	258	237	268	436	453	324	395	434	314	563
g__Salinigranum	73	71	41	56	51	81	49	48	64	62	74	50
g__Halohasta	46	56	28	46	43	35	33	35	38	21	49	13
g__Halopenitus	34	39	27	38	31	27	31	32	35	34	39	13
g__Haloferax	130	171	128	156	164	135	138	118	133	154	152	100
g__Haloplanus	50	40	33	40	30	34	32	30	40	39	32	32
g__Haloquadratum	42	26	36	48	44	43	41	40	22	41	21	28
g__Halogeometricum	29	20	28	31	37	19	22	25	34	23	35	15
g__Natronolimnobius	86	172	111	260	114	105	102	123	111	250	516	69
g__Haloterrigena	83	82	61	93	102	117	171	96	150	135	157	129
g__Natrinema	70	132	82	271	114	153	98	142	152	506	857	279
g__Natrialba	51	55	36	38	46	48	31	30	36	32	35	24
g__Natronococcus	50	75	64	68	64	50	27	32	47	48	45	50
g__Halopiger	46	52	46	40	43	34	23	23	28	30	27	27
g__Salinarchaeum	40	44	62	54	50	50	37	39	30	37	31	24
g__Natronobacterium	21	28	24	15	27	28	31	22	40	18	43	24
g__Halobiforma	20	27	22	30	27	26	17	22	24	18	30	14
g__Halostagnicola	20	33	24	32	23	29	23	18	22	25	15	17
g__Haloarcula	109	152	136	140	147	117	108	106	115	108	148	77
g__Halorhabdus	77	82	59	61	78	61	53	67	71	64	77	50
g__Halorientalis	65	89	75	95	102	95	72	75	91	96	119	73
g__Natronomonas	57	50	65	61	67	34	32	32	34	40	67	39
g__Halomicrobium	42	55	28	50	30	25	26	31	40	34	26	19
s__Haloarculaceae archaeon HArcel1	19	22	21	23	31	21	20	10	24	26	21	22
g__Halobacterium	102	113	84	91	88	77	75	68	121	109	113	61
g__Halalkalicoccus	67	57	37	62	62	148	162	64	189	124	223	262
g__Halodesulfurarchaeum	20	28	18	22	14	31	29	18	21	29	40	28
g__Halanaeroarchaeum	18	23	12	20	15	24	11	13	14	20	20	26
g__Candidatus Methanoplasma	36434	73329	67540	80409	87758	146715	100431	59800	70018	105819	73255	214642
g__Candidatus Methanomethylophilus	14920	35228	37549	36221	48527	73254	54271	33100	33584	58752	32624	119086
g__Methanomassiliicoccus	184	256	277	353	328	543	403	218	276	461	449	884
g__Ferroplasma	728	1770	1118	5312	1028	801	386	1209	722	4605	9288	1851
g__Thermoplasma	427	608	712	584	612	1889	581	297	320	434	482	2698
g__Cuniculiplasma	29	53	63	64	75	238	170	50	178	116	277	514
g__Picrophilus	7	7	3	17	10	13	6	8	16	15	19	11
g__Thermococcus	970	1213	1086	1305	1465	1216	1094	1060	1146	1245	1468	824
g__Pyrococcus	488	727	670	626	652	498	398	487	416	470	514	258
g__Palaeococcus	34	23	10	21	20	17	21	31	29	17	23	22
g__Geoglobus	64	55	52	76	54	51	38	33	25	35	57	48
g__Archaeoglobus	49	56	42	55	68	66	50	43	41	52	68	53
g__Ferroglobus	33	45	37	58	30	34	31	32	36	35	45	27
g__Methanopyrus	7	15	4	13	7	10	5	7	9	15	12	6
g__Desulfurococcus	183	172	143	88	182	158	146	127	171	60	71	56
g__Thermogladius	111	176	117	138	113	112	63	55	81	71	76	60
g__Ignicoccus	46	34	30	27	21	30	25	22	25	17	24	20
g__Staphylothermus	29	21	17	29	24	22	19	9	11	19	15	21
g__Thermosphaera	6	4	7	10	9	8	1	5	3	4	8	5
g__Pyrodictium	179	216	159	144	232	137	141	220	132	234	150	119
g__Hyperthermus	6	9	4	8	11	4	4	5	4	8	5	4
g__Pyrolobus	6	7	2	5	9	4	8	7	4	5	6	0
g__Sulfurisphaera	114	147	170	143	173	118	65	108	98	76	86	43
g__Acidianus	110	63	61	83	77	95	65	69	91	86	94	70
g__Sulfolobus	41	37	35	66	56	62	42	46	39	42	55	75
g__Metallosphaera	32	42	43	56	46	37	29	33	64	61	62	34
g__Thermoproteus	107	93	83	114	118	96	80	75	104	128	158	96
g__Vulcanisaeta	17	20	22	25	23	32	16	10	26	14	29	39
g__Pyrobaculum	4	4	7	7	10	4	3	5	1	6	6	2
g__Caldivirga	1	3	0	3	3	2	4	1	2	1	7	2
g__Thermofilum	29	28	34	39	63	30	51	28	44	33	50	32
g__Caldisphaera	14	18	10	19	20	22	34	36	38	43	38	37
g__Acidilobus	5	13	15	12	12	17	6	13	16	4	18	9
g__Nitrososphaera	36	46	38	45	34	35	17	18	29	26	46	30
g__Candidatus Nitrosocaldus	4	17	9	11	17	15	3	12	8	13	8	6
s__Candidatus Nitrosopumilus sediminis	13	17	20	14	28	12	6	9	12	13	30	14
s__Candidatus Nitrosopumilus adriaticus	5	18	14	19	16	16	12	13	11	11	17	10
s__Candidatus Nitrosomarinus catalina	12	25	14	14	11	13	16	10	19	11	17	13
g__Erysipelatoclostridium	0	0	0	1	0	7	1	0	0	0	0	1
s__Enterobacteriaceae bacterium ENNIH2	0	0	0	0	4	0	0	0	0	0	0	0
s__Nostoc sp. PCC 7120	0	0	0	0	0	0	0	0	0	0	0	0

## Sheet: 细菌pcoa
tax	CON1	CON2	CON3	CON4	CON5	CON6	3-NOP1	3-NOP2	3-NOP3	3-NOP4	3-NOP5	3-NOP6	domin	phyum	class	order	family	genus
d__Bacteria|p__Firmicutes|c__Clostridia|o__Clostridiales|f__Lachnospiraceae|g__Butyrivibrio	249670	559421	384718	421381	491061	699018	1116166	833767	724986	900699	785792	840552	d__Bacteria	p__Firmicutes	c__Clostridia	o__Clostridiales	f__Lachnospiraceae	g__Butyrivibrio
d__Bacteria|p__Firmicutes|c__Clostridia|o__Clostridiales|f__Lachnospiraceae|g__Lachnoclostridium	122925	143003	144322	93911	138868	119004	115219	106893	92936	108040	63732	73669	d__Bacteria	p__Firmicutes	c__Clostridia	o__Clostridiales	f__Lachnospiraceae	g__Lachnoclostridium
d__Bacteria|p__Firmicutes|c__Clostridia|o__Clostridiales|f__Lachnospiraceae|s__Lachnospiraceae bacterium GAM79	16934	19609	17080	14436	17772	24553	34703	26779	22939	31347	23482	32842	d__Bacteria	p__Firmicutes	c__Clostridia	o__Clostridiales	f__Lachnospiraceae	s__Lachnospiraceae bacterium GAM79
d__Bacteria|p__Firmicutes|c__Clostridia|o__Clostridiales|f__Lachnospiraceae|s__[Eubacterium] rectale	10374	19801	15689	13669	13740	25082	24519	20408	15592	20638	17358	17682	d__Bacteria	p__Firmicutes	c__Clostridia	o__Clostridiales	f__Lachnospiraceae	s__[Eubacterium] rectale
d__Bacteria|p__Firmicutes|c__Clostridia|o__Clostridiales|f__Lachnospiraceae|s__Lachnospiraceae bacterium Choco86	10205	10423	10470	7236	9864	13758	11626	12184	8908	12384	7345	8218	d__Bacteria	p__Firmicutes	c__Clostridia	o__Clostridiales	f__Lachnospiraceae	s__Lachnospiraceae bacterium Choco86
d__Bacteria|p__Firmicutes|c__Clostridia|o__Clostridiales|f__Lachnospiraceae|s__Lachnospiraceae bacterium oral taxon 500	4978	5998	5381	4403	5050	3933	5968	4322	3925	3928	2721	3277	d__Bacteria	p__Firmicutes	c__Clostridia	o__Clostridiales	f__Lachnospiraceae	s__Lachnospiraceae bacterium oral taxon 500
d__Bacteria|p__Firmicutes|c__Clostridia|o__Clostridiales|f__Lachnospiraceae|g__Blautia	30337	32352	32188	20064	26696	35425	40069	32494	27743	33889	19192	22586	d__Bacteria	p__Firmicutes	c__Clostridia	o__Clostridiales	f__Lachnospiraceae	g__Blautia
d__Bacteria|p__Firmicutes|c__Clostridia|o__Clostridiales|f__Lachnospiraceae|g__Lachnoanaerobaculum	11598	17990	20253	11720	20201	23831	20358	18257	11859	18510	10095	11375	d__Bacteria	p__Firmicutes	c__Clostridia	o__Clostridiales	f__Lachnospiraceae	g__Lachnoanaerobaculum
d__Bacteria|p__Firmicutes|c__Clostridia|o__Clostridiales|f__Lachnospiraceae|g__Anaerotignum	7948	8337	7197	5649	7481	7033	57217	14335	6207	23937	5344	21850	d__Bacteria	p__Firmicutes	c__Clostridia	o__Clostridiales	f__Lachnospiraceae	g__Anaerotignum
d__Bacteria|p__Firmicutes|c__Clostridia|o__Clostridiales|f__Lachnospiraceae|g__Roseburia	7068	8577	8029	7113	8613	10688	18017	12172	10021	14438	9283	12321	d__Bacteria	p__Firmicutes	c__Clostridia	o__Clostridiales	f__Lachnospiraceae	g__Roseburia
d__Bacteria|p__Firmicutes|c__Clostridia|o__Clostridiales|f__Lachnospiraceae|g__Anaerostipes	2924	3867	3922	3645	3473	3659	3631	2703	2744	3233	3275	4276	d__Bacteria	p__Firmicutes	c__Clostridia	o__Clostridiales	f__Lachnospiraceae	g__Anaerostipes
d__Bacteria|p__Firmicutes|c__Clostridia|o__Clostridiales|f__Lachnospiraceae|g__Herbinix	2071	3180	2535	2311	2132	2792	2792	2277	1958	2383	1826	2670	d__Bacteria	p__Firmicutes	c__Clostridia	o__Clostridiales	f__Lachnospiraceae	g__Herbinix
d__Bacteria|p__Firmicutes|c__Clostridia|o__Clostridiales|f__Lachnospiraceae|g__Cellulosilyticum	727	839	811	832	857	874	1126	769	798	957	878	945	d__Bacteria	p__Firmicutes	c__Clostridia	o__Clostridiales	f__Lachnospiraceae	g__Cellulosilyticum
d__Bacteria|p__Firmicutes|c__Clostridia|o__Clostridiales|g__Intestinimonas|s__Intestinimonas butyriciproducens	176024	191240	171781	115621	146698	126690	104972	133001	115255	98114	85692	84001	d__Bacteria	p__Firmicutes	c__Clostridia	o__Clostridiales	g__Intestinimonas	s__Intestinimonas butyriciproducens
d__Bacteria|p__Firmicutes|c__Clostridia|o__Clostridiales|g__Monoglobus|s__Monoglobus pectinilyticus	1526	1679	1825	1317	1484	2789	1319	1026	946	1157	989	1201	d__Bacteria	p__Firmicutes	c__Clostridia	o__Clostridiales	g__Monoglobus	s__Monoglobus pectinilyticus
d__Bacteria|p__Firmicutes|c__Clostridia|o__Clostridiales|f__Ruminococcaceae|g__Ruminococcus	53153	94076	89539	76754	76178	68275	92230	58884	65148	59433	51914	69296	d__Bacteria	p__Firmicutes	c__Clostridia	o__Clostridiales	f__Ruminococcaceae	g__Ruminococcus
d__Bacteria|p__Firmicutes|c__Clostridia|o__Clostridiales|f__Ruminococcaceae|g__Flavonifractor	40847	43129	41552	25493	36620	43422	30957	32484	25587	30810	20750	21631	d__Bacteria	p__Firmicutes	c__Clostridia	o__Clostridiales	f__Ruminococcaceae	g__Flavonifractor
d__Bacteria|p__Firmicutes|c__Clostridia|o__Clostridiales|f__Ruminococcaceae|s__Ruminococcaceae bacterium CPB6	19897	17780	18899	12432	19773	22062	22522	18355	13577	20445	8908	12050	d__Bacteria	p__Firmicutes	c__Clostridia	o__Clostridiales	f__Ruminococcaceae	s__Ruminococcaceae bacterium CPB6
d__Bacteria|p__Firmicutes|c__Clostridia|o__Clostridiales|f__Ruminococcaceae|s__[Clostridium] cellulosi	5300	20494	19328	28486	11501	11904	6294	3619	4627	5117	7603	10140	d__Bacteria	p__Firmicutes	c__Clostridia	o__Clostridiales	f__Ruminococcaceae	s__[Clostridium] cellulosi
d__Bacteria|p__Firmicutes|c__Clostridia|o__Clostridiales|f__Ruminococcaceae|g__Ethanoligenens	11525	17650	17800	11232	15161	8325	8903	6722	5602	6560	3804	4957	d__Bacteria	p__Firmicutes	c__Clostridia	o__Clostridiales	f__Ruminococcaceae	g__Ethanoligenens
d__Bacteria|p__Firmicutes|c__Clostridia|o__Clostridiales|f__Ruminococcaceae|g__Faecalibacterium	10677	15057	13784	12165	13179	13226	12494	11474	11799	12374	11164	13294	d__Bacteria	p__Firmicutes	c__Clostridia	o__Clostridiales	f__Ruminococcaceae	g__Faecalibacterium
d__Bacteria|p__Firmicutes|c__Clostridia|o__Clostridiales|f__Clostridiaceae|g__Clostridium	47732	59170	52593	54496	58532	46655	57647	51299	42574	55387	50170	67119	d__Bacteria	p__Firmicutes	c__Clostridia	o__Clostridiales	f__Clostridiaceae	g__Clostridium
d__Bacteria|p__Firmicutes|c__Clostridia|o__Clostridiales|f__Clostridiaceae|g__Mordavella	28628	22447	22758	15358	21280	23184	18520	16627	13781	18104	10280	12521	d__Bacteria	p__Firmicutes	c__Clostridia	o__Clostridiales	f__Clostridiaceae	g__Mordavella
d__Bacteria|p__Firmicutes|c__Clostridia|o__Clostridiales|f__Clostridiaceae|g__Geosporobacter	3115	3549	3430	1990	3213	4030	4457	3614	1964	3522	1241	1754	d__Bacteria	p__Firmicutes	c__Clostridia	o__Clostridiales	f__Clostridiaceae	g__Geosporobacter
d__Bacteria|p__Firmicutes|c__Clostridia|o__Clostridiales|f__Clostridiaceae|g__Candidatus Arthromitus	950	1454	1290	1185	1318	1021	789	860	839	809	701	747	d__Bacteria	p__Firmicutes	c__Clostridia	o__Clostridiales	f__Clostridiaceae	g__Candidatus Arthromitus
d__Bacteria|p__Firmicutes|c__Clostridia|o__Clostridiales|f__Clostridiaceae|g__Alkaliphilus	786	913	879	829	831	1166	711	690	781	846	1117	1010	d__Bacteria	p__Firmicutes	c__Clostridia	o__Clostridiales	f__Clostridiaceae	g__Alkaliphilus
d__Bacteria|p__Firmicutes|c__Clostridia|o__Clostridiales|f__Clostridiaceae|s__Clostridiaceae bacterium 14S0207	164	120	117	140	152	118	152	113	122	129	111	191	d__Bacteria	p__Firmicutes	c__Clostridia	o__Clostridiales	f__Clostridiaceae	s__Clostridiaceae bacterium 14S0207
d__Bacteria|p__Firmicutes|c__Clostridia|o__Clostridiales|f__Hungateiclostridiaceae|g__Hungateiclostridium	4280	4116	4504	2762	3713	4083	2842	2674	2442	2650	2358	2243	d__Bacteria	p__Firmicutes	c__Clostridia	o__Clostridiales	f__Hungateiclostridiaceae	g__Hungateiclostridium
d__Bacteria|p__Firmicutes|c__Clostridia|o__Clostridiales|f__Hungateiclostridiaceae|g__Thermoclostridium	3980	3582	3385	3037	4142	3801	4879	3740	3159	3666	2038	2381	d__Bacteria	p__Firmicutes	c__Clostridia	o__Clostridiales	f__Hungateiclostridiaceae	g__Thermoclostridium
d__Bacteria|p__Firmicutes|c__Clostridia|o__Clostridiales|f__Hungateiclostridiaceae|g__Mageeibacillus	1599	2994	2262	1708	1672	2339	2740	1722	1793	2317	1505	1945	d__Bacteria	p__Firmicutes	c__Clostridia	o__Clostridiales	f__Hungateiclostridiaceae	g__Mageeibacillus
d__Bacteria|p__Firmicutes|c__Clostridia|o__Clostridiales|f__Hungateiclostridiaceae|g__Pseudoclostridium	832	1003	848	924	964	1133	829	830	821	990	1054	1156	d__Bacteria	p__Firmicutes	c__Clostridia	o__Clostridiales	f__Hungateiclostridiaceae	g__Pseudoclostridium
d__Bacteria|p__Firmicutes|c__Clostridia|o__Clostridiales|f__Hungateiclostridiaceae|g__Fastidiosipila	222	451	306	329	364	501	449	454	427	483	399	496	d__Bacteria	p__Firmicutes	c__Clostridia	o__Clostridiales	f__Hungateiclostridiaceae	g__Fastidiosipila
d__Bacteria|p__Firmicutes|c__Clostridia|o__Clostridiales|f__Hungateiclostridiaceae|g__Ruminiclostridium	213	264	234	305	343	321	376	369	353	420	355	435	d__Bacteria	p__Firmicutes	c__Clostridia	o__Clostridiales	f__Hungateiclostridiaceae	g__Ruminiclostridium
d__Bacteria|p__Firmicutes|c__Clostridia|o__Clostridiales|f__Clostridiales Family XIII. Incertae Sedis|s__[Eubacterium] sulci	34222	26697	28215	17649	28055	30457	19336	23155	18194	22091	10764	9890	d__Bacteria	p__Firmicutes	c__Clostridia	o__Clostridiales	f__Clostridiales Family XIII. Incertae Sedis	s__[Eubacterium] sulci
d__Bacteria|p__Firmicutes|c__Clostridia|o__Clostridiales|f__Clostridiales Family XIII. Incertae Sedis|g__Mogibacterium	15777	18841	17932	15053	18119	20092	17582	15044	11872	17220	9735	12634	d__Bacteria	p__Firmicutes	c__Clostridia	o__Clostridiales	f__Clostridiales Family XIII. Incertae Sedis	g__Mogibacterium
d__Bacteria|p__Firmicutes|c__Clostridia|o__Clostridiales|f__Clostridiales Family XIII. Incertae Sedis|s__[Eubacterium] minutum	8083	8875	8345	7856	8008	9698	8306	7124	5250	7906	3982	5394	d__Bacteria	p__Firmicutes	c__Clostridia	o__Clostridiales	f__Clostridiales Family XIII. Incertae Sedis	s__[Eubacterium] minutum
d__Bacteria|p__Firmicutes|c__Clostridia|o__Clostridiales|f__Clostridiales Family XVII. Incertae Sedis|g__Thermaerobacter	1330	1765	1545	1432	1337	1243	1060	940	955	1014	871	1283	d__Bacteria	p__Firmicutes	c__Clostridia	o__Clostridiales	f__Clostridiales Family XVII. Incertae Sedis	g__Thermaerobacter
d__Bacteria|p__Firmicutes|c__Clostridia|o__Clostridiales|f__Clostridiales Family XVI. Incertae Sedis|g__Carboxydocella	220	307	275	252	307	310	346	221	215	287	223	295	d__Bacteria	p__Firmicutes	c__Clostridia	o__Clostridiales	f__Clostridiales Family XVI. Incertae Sedis	g__Carboxydocella
d__Bacteria|p__Firmicutes|c__Clostridia|o__Clostridiales|f__Oscillospiraceae|g__Oscillibacter	54580	69901	65275	49734	59703	66502	80619	63522	48025	63037	43649	57235	d__Bacteria	p__Firmicutes	c__Clostridia	o__Clostridiales	f__Oscillospiraceae	g__Oscillibacter
d__Bacteria|p__Firmicutes|c__Clostridia|o__Clostridiales|f__Eubacteriaceae|g__Eubacterium	27683	37630	34250	30274	35624	63767	400135	89477	36848	147306	40900	194275	d__Bacteria	p__Firmicutes	c__Clostridia	o__Clostridiales	f__Eubacteriaceae	g__Eubacterium
d__Bacteria|p__Firmicutes|c__Clostridia|o__Clostridiales|f__Eubacteriaceae|g__Acetobacterium	1531	2166	1601	2014	1947	2220	2441	1990	1653	2272	1756	2136	d__Bacteria	p__Firmicutes	c__Clostridia	o__Clostridiales	f__Eubacteriaceae	g__Acetobacterium
d__Bacteria|p__Firmicutes|c__Clostridia|o__Clostridiales|f__Peptococcaceae|g__Desulfosporosinus	4167	3098	3598	1953	2986	2151	1566	1571	1634	1634	1292	1208	d__Bacteria	p__Firmicutes	c__Clostridia	o__Clostridiales	f__Peptococcaceae	g__Desulfosporosinus
d__Bacteria|p__Firmicutes|c__Clostridia|o__Clostridiales|f__Peptococcaceae|g__Desulfotomaculum	2745	1958	1762	1796	1896	1143	948	872	944	991	1026	1074	d__Bacteria	p__Firmicutes	c__Clostridia	o__Clostridiales	f__Peptococcaceae	g__Desulfotomaculum
d__Bacteria|p__Firmicutes|c__Clostridia|o__Clostridiales|f__Peptococcaceae|g__Desulfitobacterium	1201	1357	1157	1497	1312	1157	1425	1106	1092	1243	1235	1451	d__Bacteria	p__Firmicutes	c__Clostridia	o__Clostridiales	f__Peptococcaceae	g__Desulfitobacterium
d__Bacteria|p__Firmicutes|c__Clostridia|o__Clostridiales|f__Peptococcaceae|g__Dehalobacterium	881	1294	958	933	933	996	1021	718	691	859	589	868	d__Bacteria	p__Firmicutes	c__Clostridia	o__Clostridiales	f__Peptococcaceae	g__Dehalobacterium
d__Bacteria|p__Firmicutes|c__Clostridia|o__Clostridiales|f__Peptococcaceae|g__Desulfallas	643	907	734	795	606	815	609	472	493	534	512	606	d__Bacteria	p__Firmicutes	c__Clostridia	o__Clostridiales	f__Peptococcaceae	g__Desulfallas
d__Bacteria|p__Firmicutes|c__Clostridia|o__Clostridiales|f__Peptococcaceae|g__Dehalobacter	560	710	634	637	708	632	589	590	556	571	551	652	d__Bacteria	p__Firmicutes	c__Clostridia	o__Clostridiales	f__Peptococcaceae	g__Dehalobacter
d__Bacteria|p__Firmicutes|c__Clostridia|o__Clostridiales|f__Peptococcaceae|g__Syntrophobotulus	491	690	628	567	668	688	885	596	493	574	484	571	d__Bacteria	p__Firmicutes	c__Clostridia	o__Clostridiales	f__Peptococcaceae	g__Syntrophobotulus
d__Bacteria|p__Firmicutes|c__Clostridia|o__Clostridiales|f__Peptococcaceae|g__Desulfofarcimen	290	396	329	464	325	452	271	265	291	358	381	383	d__Bacteria	p__Firmicutes	c__Clostridia	o__Clostridiales	f__Peptococcaceae	g__Desulfofarcimen
d__Bacteria|p__Firmicutes|c__Clostridia|o__Clostridiales|f__Peptococcaceae|g__Candidatus Desulforudis	231	278	231	234	234	186	193	194	163	210	196	182	d__Bacteria	p__Firmicutes	c__Clostridia	o__Clostridiales	f__Peptococcaceae	g__Candidatus Desulforudis
d__Bacteria|p__Firmicutes|c__Clostridia|o__Clostridiales|f__Peptococcaceae|g__Thermincola	229	194	151	199	199	157	95	127	151	120	168	167	d__Bacteria	p__Firmicutes	c__Clostridia	o__Clostridiales	f__Peptococcaceae	g__Thermincola
d__Bacteria|p__Firmicutes|c__Clostridia|o__Clostridiales|f__Peptostreptococcaceae|g__Clostridioides	6951	8777	9380	6626	7082	10278	4774	3968	3376	3580	3339	3518	d__Bacteria	p__Firmicutes	c__Clostridia	o__Clostridiales	f__Peptostreptococcaceae	g__Clostridioides
d__Bacteria|p__Firmicutes|c__Clostridia|o__Clostridiales|f__Peptostreptococcaceae|g__Peptoclostridium	1352	1781	1671	1319	1374	1672	1686	1364	1337	1589	1353	1710	d__Bacteria	p__Firmicutes	c__Clostridia	o__Clostridiales	f__Peptostreptococcaceae	g__Peptoclostridium
d__Bacteria|p__Firmicutes|c__Clostridia|o__Clostridiales|f__Peptostreptococcaceae|g__Acetoanaerobium	529	690	625	747	701	695	528	406	440	546	457	683	d__Bacteria	p__Firmicutes	c__Clostridia	o__Clostridiales	f__Peptostreptococcaceae	g__Acetoanaerobium
d__Bacteria|p__Firmicutes|c__Clostridia|o__Clostridiales|f__Peptostreptococcaceae|s__Peptostreptococcaceae bacterium oral taxon 929	495	1284	1186	2077	779	767	483	335	487	484	802	1129	d__Bacteria	p__Firmicutes	c__Clostridia	o__Clostridiales	f__Peptostreptococcaceae	s__Peptostreptococcaceae bacterium oral taxon 929
d__Bacteria|p__Firmicutes|c__Clostridia|o__Clostridiales|f__Peptostreptococcaceae|g__Filifactor	170	177	176	203	204	238	171	174	155	191	201	225	d__Bacteria	p__Firmicutes	c__Clostridia	o__Clostridiales	f__Peptostreptococcaceae	g__Filifactor
d__Bacteria|p__Firmicutes|c__Clostridia|o__Clostridiales|f__Peptostreptococcaceae|g__Paeniclostridium	158	166	168	151	182	302	3094	408	175	762	193	632	d__Bacteria	p__Firmicutes	c__Clostridia	o__Clostridiales	f__Peptostreptococcaceae	g__Paeniclostridium
d__Bacteria|p__Firmicutes|c__Clostridia|o__Clostridiales|f__Christensenellaceae|g__Christensenella	1387	1867	1674	1461	1566	2010	1402	1341	1229	1437	1220	1529	d__Bacteria	p__Firmicutes	c__Clostridia	o__Clostridiales	f__Christensenellaceae	g__Christensenella
d__Bacteria|p__Firmicutes|c__Clostridia|o__Clostridiales|f__Symbiobacteriaceae|g__Symbiobacterium	1092	1214	979	963	1004	834	886	809	827	825	801	872	d__Bacteria	p__Firmicutes	c__Clostridia	o__Clostridiales	f__Symbiobacteriaceae	g__Symbiobacterium
d__Bacteria|p__Firmicutes|c__Clostridia|o__Clostridiales|f__Heliobacteriaceae|g__Heliobacterium	797	951	895	824	831	924	1091	890	756	871	713	836	d__Bacteria	p__Firmicutes	c__Clostridia	o__Clostridiales	f__Heliobacteriaceae	g__Heliobacterium
d__Bacteria|p__Firmicutes|c__Clostridia|o__Clostridiales|f__Syntrophomonadaceae|g__Syntrophomonas	306	736	486	1469	377	424	286	158	260	232	859	1492	d__Bacteria	p__Firmicutes	c__Clostridia	o__Clostridiales	f__Syntrophomonadaceae	g__Syntrophomonas
d__Bacteria|p__Firmicutes|c__Clostridia|o__Clostridiales|f__Syntrophomonadaceae|g__Syntrophothermus	260	344	344	352	405	242	155	152	184	180	161	180	d__Bacteria	p__Firmicutes	c__Clostridia	o__Clostridiales	f__Syntrophomonadaceae	g__Syntrophothermus
d__Bacteria|p__Firmicutes|c__Clostridia|o__Thermoanaerobacterales|f__Thermoanaerobacteraceae|g__Carboxydothermus	5545	8718	8914	6692	10177	13023	15797	14010	10101	14550	6003	8456	d__Bacteria	p__Firmicutes	c__Clostridia	o__Thermoanaerobacterales	f__Thermoanaerobacteraceae	g__Carboxydothermus
d__Bacteria|p__Firmicutes|c__Clostridia|o__Thermoanaerobacterales|f__Thermoanaerobacteraceae|g__Caldanaerobacter	812	2576	3007	3542	1382	2746	790	478	567	543	1542	2121	d__Bacteria	p__Firmicutes	c__Clostridia	o__Thermoanaerobacterales	f__Thermoanaerobacteraceae	g__Caldanaerobacter
d__Bacteria|p__Firmicutes|c__Clostridia|o__Thermoanaerobacterales|f__Thermoanaerobacteraceae|g__Moorella	471	609	492	573	576	471	399	412	415	422	455	505	d__Bacteria	p__Firmicutes	c__Clostridia	o__Thermoanaerobacterales	f__Thermoanaerobacteraceae	g__Moorella
d__Bacteria|p__Firmicutes|c__Clostridia|o__Thermoanaerobacterales|f__Thermoanaerobacteraceae|g__Ammonifex	129	145	120	122	158	128	144	138	116	146	128	183	d__Bacteria	p__Firmicutes	c__Clostridia	o__Thermoanaerobacterales	f__Thermoanaerobacteraceae	g__Ammonifex
d__Bacteria|p__Firmicutes|c__Clostridia|o__Thermoanaerobacterales|f__Thermoanaerobacteraceae|g__Thermacetogenium	420	565	439	548	395	504	398	309	396	559	405	713	d__Bacteria	p__Firmicutes	c__Clostridia	o__Thermoanaerobacterales	f__Thermoanaerobacteraceae	g__Thermacetogenium
d__Bacteria|p__Firmicutes|c__Clostridia|o__Thermoanaerobacterales|f__Thermoanaerobacteraceae|g__Thermoanaerobacter	387	493	553	523	458	511	526	325	340	419	380	510	d__Bacteria	p__Firmicutes	c__Clostridia	o__Thermoanaerobacterales	f__Thermoanaerobacteraceae	g__Thermoanaerobacter
d__Bacteria|p__Firmicutes|c__Clostridia|o__Thermoanaerobacterales|f__Thermoanaerobacteraceae|g__Tepidanaerobacter	169	189	178	261	189	177	158	127	133	156	163	270	d__Bacteria	p__Firmicutes	c__Clostridia	o__Thermoanaerobacterales	f__Thermoanaerobacteraceae	g__Tepidanaerobacter
d__Bacteria|p__Firmicutes|c__Clostridia|o__Thermoanaerobacterales|f__Thermoanaerobacteraceae|g__Thermanaeromonas	119	228	156	198	160	194	159	140	116	152	159	181	d__Bacteria	p__Firmicutes	c__Clostridia	o__Thermoanaerobacterales	f__Thermoanaerobacteraceae	g__Thermanaeromonas
d__Bacteria|p__Firmicutes|c__Clostridia|o__Thermoanaerobacterales|f__Thermoanaerobacterales Family III. Incertae Sedis|g__Thermoanaerobacterium	2553	3541	2707	2869	2956	3325	3085	2489	2457	3008	2354	2552	d__Bacteria	p__Firmicutes	c__Clostridia	o__Thermoanaerobacterales	f__Thermoanaerobacterales Family III. Incertae Sedis	g__Thermoanaerobacterium
d__Bacteria|p__Firmicutes|c__Clostridia|o__Thermoanaerobacterales|f__Thermoanaerobacterales Family III. Incertae Sedis|g__Caldicellulosiruptor	1588	1699	1283	1716	1465	2663	1372	1223	1606	1414	2319	2020	d__Bacteria	p__Firmicutes	c__Clostridia	o__Thermoanaerobacterales	f__Thermoanaerobacterales Family III. Incertae Sedis	g__Caldicellulosiruptor
d__Bacteria|p__Firmicutes|c__Clostridia|o__Thermoanaerobacterales|f__Thermoanaerobacterales Family III. Incertae Sedis|g__Thermosediminibacter	711	612	569	530	591	432	469	428	391	432	350	414	d__Bacteria	p__Firmicutes	c__Clostridia	o__Thermoanaerobacterales	f__Thermoanaerobacterales Family III. Incertae Sedis	g__Thermosediminibacter
d__Bacteria|p__Firmicutes|c__Clostridia|o__Thermoanaerobacterales|f__Thermoanaerobacterales Family IV. Incertae Sedis|g__Mahella	450	615	499	513	465	530	543	426	376	653	437	659	d__Bacteria	p__Firmicutes	c__Clostridia	o__Thermoanaerobacterales	f__Thermoanaerobacterales Family IV. Incertae Sedis	g__Mahella
d__Bacteria|p__Firmicutes|c__Clostridia|o__Thermoanaerobacterales|f__Thermodesulfobiaceae|g__Thermodesulfobium	374	346	229	554	483	193	559	518	363	575	566	771	d__Bacteria	p__Firmicutes	c__Clostridia	o__Thermoanaerobacterales	f__Thermodesulfobiaceae	g__Thermodesulfobium
d__Bacteria|p__Firmicutes|c__Clostridia|o__Halanaerobiales|f__Halanaerobiaceae|g__Halothermothrix	680	1030	928	874	1053	2614	2216	1834	1158	1975	1260	1616	d__Bacteria	p__Firmicutes	c__Clostridia	o__Halanaerobiales	f__Halanaerobiaceae	g__Halothermothrix
d__Bacteria|p__Firmicutes|c__Clostridia|o__Halanaerobiales|f__Halanaerobiaceae|g__Halanaerobium	232	240	247	200	274	229	230	211	238	224	250	216	d__Bacteria	p__Firmicutes	c__Clostridia	o__Halanaerobiales	f__Halanaerobiaceae	g__Halanaerobium
d__Bacteria|p__Firmicutes|c__Clostridia|o__Halanaerobiales|f__Halobacteroidaceae|g__Acetohalobium	328	207	240	234	294	319	246	392	243	245	242	289	d__Bacteria	p__Firmicutes	c__Clostridia	o__Halanaerobiales	f__Halobacteroidaceae	g__Acetohalobium
d__Bacteria|p__Firmicutes|c__Clostridia|o__Halanaerobiales|f__Halobacteroidaceae|g__Halobacteroides	40	58	49	56	49	61	108	80	49	83	60	106	d__Bacteria	p__Firmicutes	c__Clostridia	o__Halanaerobiales	f__Halobacteroidaceae	g__Halobacteroides
d__Bacteria|p__Firmicutes|c__Clostridia|o__Natranaerobiales|f__Natranaerobiaceae|g__Natranaerobius	217	228	172	287	347	127	321	259	182	359	290	441	d__Bacteria	p__Firmicutes	c__Clostridia	o__Natranaerobiales	f__Natranaerobiaceae	g__Natranaerobius
d__Bacteria|p__Firmicutes|c__Bacilli|o__Lactobacillales|f__Streptococcaceae|g__Streptococcus	47018	9540	5542	7139	8630	19904	19129	37568	32399	42761	18183	20212	d__Bacteria	p__Firmicutes	c__Bacilli	o__Lactobacillales	f__Streptococcaceae	g__Streptococcus
d__Bacteria|p__Firmicutes|c__Bacilli|o__Lactobacillales|f__Streptococcaceae|g__Lactococcus	453	362	306	369	430	458	470	388	354	500	466	554	d__Bacteria	p__Firmicutes	c__Bacilli	o__Lactobacillales	f__Streptococcaceae	g__Lactococcus
d__Bacteria|p__Firmicutes|c__Bacilli|o__Lactobacillales|f__Lactobacillaceae|g__Lactobacillus	15321	17297	13471	19080	23295	17872	26511	20466	15250	25235	23470	35400	d__Bacteria	p__Firmicutes	c__Bacilli	o__Lactobacillales	f__Lactobacillaceae	g__Lactobacillus
d__Bacteria|p__Firmicutes|c__Bacilli|o__Lactobacillales|f__Lactobacillaceae|g__Pediococcus	332	324	282	381	368	497	431	319	344	454	446	481	d__Bacteria	p__Firmicutes	c__Bacilli	o__Lactobacillales	f__Lactobacillaceae	g__Pediococcus
d__Bacteria|p__Firmicutes|c__Bacilli|o__Lactobacillales|f__Enterococcaceae|g__Enterococcus	1417	1455	1328	1458	1974	1752	1849	1675	1569	1879	1702	1915	d__Bacteria	p__Firmicutes	c__Bacilli	o__Lactobacillales	f__Enterococcaceae	g__Enterococcus
d__Bacteria|p__Firmicutes|c__Bacilli|o__Lactobacillales|f__Enterococcaceae|g__Vagococcus	252	310	197	244	292	216	211	240	256	213	229	292	d__Bacteria	p__Firmicutes	c__Bacilli	o__Lactobacillales	f__Enterococcaceae	g__Vagococcus
d__Bacteria|p__Firmicutes|c__Bacilli|o__Lactobacillales|f__Enterococcaceae|g__Tetragenococcus	189	206	169	223	178	256	251	123	149	181	160	220	d__Bacteria	p__Firmicutes	c__Bacilli	o__Lactobacillales	f__Enterococcaceae	g__Tetragenococcus
d__Bacteria|p__Firmicutes|c__Bacilli|o__Lactobacillales|f__Enterococcaceae|g__Melissococcus	139	109	129	142	152	131	139	131	102	126	139	148	d__Bacteria	p__Firmicutes	c__Bacilli	o__Lactobacillales	f__Enterococcaceae	g__Melissococcus
d__Bacteria|p__Firmicutes|c__Bacilli|o__Lactobacillales|f__Leuconostocaceae|g__Weissella	1308	724	646	780	856	711	888	635	593	593	657	708	d__Bacteria	p__Firmicutes	c__Bacilli	o__Lactobacillales	f__Leuconostocaceae	g__Weissella
d__Bacteria|p__Firmicutes|c__Bacilli|o__Lactobacillales|f__Leuconostocaceae|g__Leuconostoc	247	237	215	270	323	291	1041	303	263	291	334	293	d__Bacteria	p__Firmicutes	c__Bacilli	o__Lactobacillales	f__Leuconostocaceae	g__Leuconostoc
d__Bacteria|p__Firmicutes|c__Bacilli|o__Lactobacillales|f__Leuconostocaceae|g__Oenococcus	70	98	98	96	99	109	102	98	88	109	91	139	d__Bacteria	p__Firmicutes	c__Bacilli	o__Lactobacillales	f__Leuconostocaceae	g__Oenococcus
d__Bacteria|p__Firmicutes|c__Bacilli|o__Lactobacillales|f__Aerococcaceae|g__Aerococcus	375	458	392	462	514	520	598	520	484	693	584	752	d__Bacteria	p__Firmicutes	c__Bacilli	o__Lactobacillales	f__Aerococcaceae	g__Aerococcus
d__Bacteria|p__Firmicutes|c__Bacilli|o__Lactobacillales|f__Aerococcaceae|s__Aerococcaceae bacterium ZY16052	147	196	127	136	160	232	270	146	173	148	239	226	d__Bacteria	p__Firmicutes	c__Bacilli	o__Lactobacillales	f__Aerococcaceae	s__Aerococcaceae bacterium ZY16052
d__Bacteria|p__Firmicutes|c__Bacilli|o__Lactobacillales|f__Carnobacteriaceae|g__Carnobacterium	327	423	320	462	460	358	565	392	378	489	436	618	d__Bacteria	p__Firmicutes	c__Bacilli	o__Lactobacillales	f__Carnobacteriaceae	g__Carnobacterium
d__Bacteria|p__Firmicutes|c__Bacilli|o__Lactobacillales|f__Carnobacteriaceae|g__Jeotgalibaca	142	169	118	142	160	196	257	193	136	205	180	181	d__Bacteria	p__Firmicutes	c__Bacilli	o__Lactobacillales	f__Carnobacteriaceae	g__Jeotgalibaca
d__Bacteria|p__Firmicutes|c__Bacilli|o__Lactobacillales|f__Carnobacteriaceae|g__Marinilactibacillus	30	44	57	38	60	74	110	73	84	91	94	105	d__Bacteria	p__Firmicutes	c__Bacilli	o__Lactobacillales	f__Carnobacteriaceae	g__Marinilactibacillus
d__Bacteria|p__Firmicutes|c__Bacilli|o__Bacillales|f__Bacillaceae|g__Bacillus	13932	16048	13646	15695	21792	18013	17742	16534	15385	20468	19117	22672	d__Bacteria	p__Firmicutes	c__Bacilli	o__Bacillales	f__Bacillaceae	g__Bacillus
d__Bacteria|p__Firmicutes|c__Bacilli|o__Bacillales|f__Bacillaceae|g__Lysinibacillus	1869	2446	2586	2775	3715	3341	1964	3005	2935	2069	2630	1585	d__Bacteria	p__Firmicutes	c__Bacilli	o__Bacillales	f__Bacillaceae	g__Lysinibacillus
d__Bacteria|p__Firmicutes|c__Bacilli|o__Bacillales|f__Bacillaceae|g__Virgibacillus	1016	1398	990	1558	1721	1816	1510	2121	1477	1472	1787	1596	d__Bacteria	p__Firmicutes	c__Bacilli	o__Bacillales	f__Bacillaceae	g__Virgibacillus
d__Bacteria|p__Firmicutes|c__Bacilli|o__Bacillales|f__Bacillaceae|g__Geobacillus	649	655	594	666	707	764	743	658	628	776	730	851	d__Bacteria	p__Firmicutes	c__Bacilli	o__Bacillales	f__Bacillaceae	g__Geobacillus
d__Bacteria|p__Firmicutes|c__Bacilli|o__Bacillales|f__Bacillaceae|g__Anoxybacillus	304	330	251	309	375	323	316	310	295	336	345	386	d__Bacteria	p__Firmicutes	c__Bacilli	o__Bacillales	f__Bacillaceae	g__Anoxybacillus
d__Bacteria|p__Firmicutes|c__Bacilli|o__Bacillales|f__Bacillaceae|g__Oceanobacillus	238	278	252	275	338	350	424	320	329	378	329	364	d__Bacteria	p__Firmicutes	c__Bacilli	o__Bacillales	f__Bacillaceae	g__Oceanobacillus
d__Bacteria|p__Firmicutes|c__Bacilli|o__Bacillales|f__Bacillaceae|g__Halobacillus	205	305	177	303	250	254	242	188	219	281	244	335	d__Bacteria	p__Firmicutes	c__Bacilli	o__Bacillales	f__Bacillaceae	g__Halobacillus
d__Bacteria|p__Firmicutes|c__Bacilli|o__Bacillales|f__Bacillaceae|g__Fictibacillus	200	241	209	251	254	293	192	257	235	232	241	312	d__Bacteria	p__Firmicutes	c__Bacilli	o__Bacillales	f__Bacillaceae	g__Fictibacillus
d__Bacteria|p__Firmicutes|c__Bacilli|o__Bacillales|f__Bacillaceae|g__Parageobacillus	196	200	202	232	277	136	162	126	124	140	134	151	d__Bacteria	p__Firmicutes	c__Bacilli	o__Bacillales	f__Bacillaceae	g__Parageobacillus
d__Bacteria|p__Firmicutes|c__Bacilli|o__Bacillales|f__Bacillaceae|g__Salimicrobium	127	111	126	134	151	160	124	106	90	153	115	185	d__Bacteria	p__Firmicutes	c__Bacilli	o__Bacillales	f__Bacillaceae	g__Salimicrobium
d__Bacteria|p__Firmicutes|c__Bacilli|o__Bacillales|f__Bacillaceae|g__Aeribacillus	105	104	82	94	84	160	134	112	87	109	72	99	d__Bacteria	p__Firmicutes	c__Bacilli	o__Bacillales	f__Bacillaceae	g__Aeribacillus
d__Bacteria|p__Firmicutes|c__Bacilli|o__Bacillales|f__Bacillaceae|g__Amphibacillus	93	96	87	99	106	110	94	108	74	131	146	142	d__Bacteria	p__Firmicutes	c__Bacilli	o__Bacillales	f__Bacillaceae	g__Amphibacillus
d__Bacteria|p__Firmicutes|c__Bacilli|o__Bacillales|f__Bacillaceae|g__Lentibacillus	89	88	76	71	96	92	64	60	51	78	63	78	d__Bacteria	p__Firmicutes	c__Bacilli	o__Bacillales	f__Bacillaceae	g__Lentibacillus
d__Bacteria|p__Firmicutes|c__Bacilli|o__Bacillales|f__Bacillaceae|g__Terribacillus	74	107	88	100	115	123	132	127	93	145	102	120	d__Bacteria	p__Firmicutes	c__Bacilli	o__Bacillales	f__Bacillaceae	g__Terribacillus
d__Bacteria|p__Firmicutes|c__Bacilli|o__Bacillales|f__Bacillaceae|g__Paraliobacillus	70	101	77	102	113	96	197	126	103	140	123	144	d__Bacteria	p__Firmicutes	c__Bacilli	o__Bacillales	f__Bacillaceae	g__Paraliobacillus
d__Bacteria|p__Firmicutes|c__Bacilli|o__Bacillales|f__Paenibacillaceae|g__Paenibacillus	15489	19799	17359	17322	19241	20175	26286	19486	16699	23234	20120	28499	d__Bacteria	p__Firmicutes	c__Bacilli	o__Bacillales	f__Paenibacillaceae	g__Paenibacillus
d__Bacteria|p__Firmicutes|c__Bacilli|o__Bacillales|f__Paenibacillaceae|g__Thermobacillus	1318	1196	962	1388	1112	897	706	560	660	683	720	930	d__Bacteria	p__Firmicutes	c__Bacilli	o__Bacillales	f__Paenibacillaceae	g__Thermobacillus
d__Bacteria|p__Firmicutes|c__Bacilli|o__Bacillales|f__Paenibacillaceae|g__Brevibacillus	638	763	614	806	849	790	786	608	641	657	793	885	d__Bacteria	p__Firmicutes	c__Bacilli	o__Bacillales	f__Paenibacillaceae	g__Brevibacillus
d__Bacteria|p__Firmicutes|c__Bacilli|o__Bacillales|f__Paenibacillaceae|g__Aneurinibacillus	305	290	317	277	289	226	322	212	208	235	193	348	d__Bacteria	p__Firmicutes	c__Bacilli	o__Bacillales	f__Paenibacillaceae	g__Aneurinibacillus
d__Bacteria|p__Firmicutes|c__Bacilli|o__Bacillales|f__Paenibacillaceae|s__Paenibacillaceae bacterium GAS479	161	247	165	186	190	174	154	130	135	163	154	176	d__Bacteria	p__Firmicutes	c__Bacilli	o__Bacillales	f__Paenibacillaceae	s__Paenibacillaceae bacterium GAS479
d__Bacteria|p__Firmicutes|c__Bacilli|o__Bacillales|f__Alicyclobacillaceae|g__Kyrpidia	5689	7934	6465	6114	8123	2952	1404	3100	5080	2732	3860	2376	d__Bacteria	p__Firmicutes	c__Bacilli	o__Bacillales	f__Alicyclobacillaceae	g__Kyrpidia
d__Bacteria|p__Firmicutes|c__Bacilli|o__Bacillales|f__Alicyclobacillaceae|g__Tumebacillus	1938	2013	2061	1625	1970	1780	1649	1633	1372	1379	1056	975	d__Bacteria	p__Firmicutes	c__Bacilli	o__Bacillales	f__Alicyclobacillaceae	g__Tumebacillus
d__Bacteria|p__Firmicutes|c__Bacilli|o__Bacillales|f__Alicyclobacillaceae|g__Alicyclobacillus	519	570	474	517	519	511	459	359	392	437	422	582	d__Bacteria	p__Firmicutes	c__Bacilli	o__Bacillales	f__Alicyclobacillaceae	g__Alicyclobacillus
d__Bacteria|p__Firmicutes|c__Bacilli|o__Bacillales|f__Staphylococcaceae|g__Staphylococcus	2373	2540	2108	2551	2724	2901	3297	3950	5731	3667	3189	3516	d__Bacteria	p__Firmicutes	c__Bacilli	o__Bacillales	f__Staphylococcaceae	g__Staphylococcus
d__Bacteria|p__Firmicutes|c__Bacilli|o__Bacillales|f__Staphylococcaceae|g__Salinicoccus	191	220	159	181	202	171	212	142	137	197	137	241	d__Bacteria	p__Firmicutes	c__Bacilli	o__Bacillales	f__Staphylococcaceae	g__Salinicoccus
d__Bacteria|p__Firmicutes|c__Bacilli|o__Bacillales|f__Staphylococcaceae|g__Macrococcus	176	176	165	220	216	220	217	198	217	265	305	276	d__Bacteria	p__Firmicutes	c__Bacilli	o__Bacillales	f__Staphylococcaceae	g__Macrococcus
d__Bacteria|p__Firmicutes|c__Bacilli|o__Bacillales|f__Staphylococcaceae|g__Auricoccus	133	328	343	259	407	606	1216	798	505	767	386	529	d__Bacteria	p__Firmicutes	c__Bacilli	o__Bacillales	f__Staphylococcaceae	g__Auricoccus
d__Bacteria|p__Firmicutes|c__Bacilli|o__Bacillales|f__Staphylococcaceae|g__Jeotgalicoccus	59	99	86	109	90	81	90	67	70	65	95	100	d__Bacteria	p__Firmicutes	c__Bacilli	o__Bacillales	f__Staphylococcaceae	g__Jeotgalicoccus
d__Bacteria|p__Firmicutes|c__Bacilli|o__Bacillales|f__Planococcaceae|g__Planococcus	790	905	784	883	948	893	950	708	753	935	745	1032	d__Bacteria	p__Firmicutes	c__Bacilli	o__Bacillales	f__Planococcaceae	g__Planococcus
d__Bacteria|p__Firmicutes|c__Bacilli|o__Bacillales|f__Planococcaceae|g__Sporosarcina	496	611	498	733	640	715	756	598	724	685	887	1056	d__Bacteria	p__Firmicutes	c__Bacilli	o__Bacillales	f__Planococcaceae	g__Sporosarcina
d__Bacteria|p__Firmicutes|c__Bacilli|o__Bacillales|f__Planococcaceae|g__Jeotgalibacillus	128	202	143	138	158	179	204	184	168	203	166	195	d__Bacteria	p__Firmicutes	c__Bacilli	o__Bacillales	f__Planococcaceae	g__Jeotgalibacillus
d__Bacteria|p__Firmicutes|c__Bacilli|o__Bacillales|f__Planococcaceae|g__Kurthia	95	110	107	122	132	97	86	57	59	57	110	75	d__Bacteria	p__Firmicutes	c__Bacilli	o__Bacillales	f__Planococcaceae	g__Kurthia
d__Bacteria|p__Firmicutes|c__Bacilli|o__Bacillales|f__Planococcaceae|g__Rummeliibacillus	94	143	102	143	119	120	125	135	92	184	164	253	d__Bacteria	p__Firmicutes	c__Bacilli	o__Bacillales	f__Planococcaceae	g__Rummeliibacillus
d__Bacteria|p__Firmicutes|c__Bacilli|o__Bacillales|f__Planococcaceae|g__Solibacillus	84	112	101	129	134	143	119	96	121	141	165	133	d__Bacteria	p__Firmicutes	c__Bacilli	o__Bacillales	f__Planococcaceae	g__Solibacillus
d__Bacteria|p__Firmicutes|c__Bacilli|o__Bacillales|f__Planococcaceae|g__Paenisporosarcina	39	59	51	88	96	199	99	406	129	260	207	260	d__Bacteria	p__Firmicutes	c__Bacilli	o__Bacillales	f__Planococcaceae	g__Paenisporosarcina
d__Bacteria|p__Firmicutes|c__Bacilli|o__Bacillales|f__Listeriaceae|g__Listeria	868	1242	853	878	959	1337	1059	950	840	1155	1111	1136	d__Bacteria	p__Firmicutes	c__Bacilli	o__Bacillales	f__Listeriaceae	g__Listeria
d__Bacteria|p__Firmicutes|c__Bacilli|o__Bacillales|f__Listeriaceae|g__Brochothrix	675	620	642	433	654	553	669	545	351	535	288	406	d__Bacteria	p__Firmicutes	c__Bacilli	o__Bacillales	f__Listeriaceae	g__Brochothrix
d__Bacteria|p__Firmicutes|c__Bacilli|o__Bacillales|g__Gemella|s__Gemella morbillorum	426	448	408	681	714	259	167	233	384	329	480	463	d__Bacteria	p__Firmicutes	c__Bacilli	o__Bacillales	g__Gemella	s__Gemella morbillorum
d__Bacteria|p__Firmicutes|c__Bacilli|o__Bacillales|g__Gemella|s__Gemella sp. oral taxon 928	1	0	0	1	0	2	1	0	1	0	3	0	d__Bacteria	p__Firmicutes	c__Bacilli	o__Bacillales	g__Gemella	s__Gemella sp. oral taxon 928
d__Bacteria|p__Firmicutes|c__Bacilli|o__Bacillales|g__Gemella|s__Gemella sp. ND 6198	1	9	4	1	7	10	6	8	7	14	13	9	d__Bacteria	p__Firmicutes	c__Bacilli	o__Bacillales	g__Gemella	s__Gemella sp. ND 6198
d__Bacteria|p__Firmicutes|c__Bacilli|o__Bacillales|g__Exiguobacterium|s__Exiguobacterium sibiricum	161	185	132	194	194	165	112	93	142	106	216	173	d__Bacteria	p__Firmicutes	c__Bacilli	o__Bacillales	g__Exiguobacterium	s__Exiguobacterium sibiricum
d__Bacteria|p__Firmicutes|c__Bacilli|o__Bacillales|g__Exiguobacterium|s__Exiguobacterium sp. AT1b	85	97	100	108	104	101	94	75	82	84	113	129	d__Bacteria	p__Firmicutes	c__Bacilli	o__Bacillales	g__Exiguobacterium	s__Exiguobacterium sp. AT1b
d__Bacteria|p__Firmicutes|c__Bacilli|o__Bacillales|g__Exiguobacterium|s__Exiguobacterium oxidotolerans	69	90	89	108	153	140	181	123	124	160	161	192	d__Bacteria	p__Firmicutes	c__Bacilli	o__Bacillales	g__Exiguobacterium	s__Exiguobacterium oxidotolerans
d__Bacteria|p__Firmicutes|c__Bacilli|o__Bacillales|g__Exiguobacterium|s__Exiguobacterium antarcticum	28	38	28	43	44	43	47	27	33	57	55	74	d__Bacteria	p__Firmicutes	c__Bacilli	o__Bacillales	g__Exiguobacterium	s__Exiguobacterium antarcticum
d__Bacteria|p__Firmicutes|c__Bacilli|o__Bacillales|g__Exiguobacterium|s__Exiguobacterium sp. MH3	28	38	39	28	33	31	39	29	30	34	34	40	d__Bacteria	p__Firmicutes	c__Bacilli	o__Bacillales	g__Exiguobacterium	s__Exiguobacterium sp. MH3
d__Bacteria|p__Firmicutes|c__Bacilli|o__Bacillales|g__Exiguobacterium|s__Exiguobacterium sp. ZWU0009	7	7	7	6	2	13	4	7	5	6	6	11	d__Bacteria	p__Firmicutes	c__Bacilli	o__Bacillales	g__Exiguobacterium	s__Exiguobacterium sp. ZWU0009
d__Bacteria|p__Firmicutes|c__Bacilli|o__Bacillales|g__Exiguobacterium|s__Exiguobacterium sp. U13-1	2	7	1	3	7	4	5	6	4	4	6	4	d__Bacteria	p__Firmicutes	c__Bacilli	o__Bacillales	g__Exiguobacterium	s__Exiguobacterium sp. U13-1
d__Bacteria|p__Firmicutes|c__Bacilli|o__Bacillales|f__Thermoactinomycetaceae|g__Laceyella	201	278	241	217	254	207	182	197	195	190	215	290	d__Bacteria	p__Firmicutes	c__Bacilli	o__Bacillales	f__Thermoactinomycetaceae	g__Laceyella
d__Bacteria|p__Firmicutes|c__Bacilli|o__Bacillales|f__Thermoactinomycetaceae|g__Novibacillus	186	214	234	166	230	377	166	175	121	151	153	130	d__Bacteria	p__Firmicutes	c__Bacilli	o__Bacillales	f__Thermoactinomycetaceae	g__Novibacillus
d__Bacteria|p__Firmicutes|c__Bacilli|o__Bacillales|f__Sporolactobacillaceae|s__[Bacillus] selenitireducens	174	159	136	196	181	133	158	125	132	164	158	211	d__Bacteria	p__Firmicutes	c__Bacilli	o__Bacillales	f__Sporolactobacillaceae	s__[Bacillus] selenitireducens
d__Bacteria|p__Firmicutes|c__Negativicutes|o__Selenomonadales|f__Selenomonadaceae|g__Selenomonas	22808	199958	152803	178284	248641	494781	384509	581507	557881	538263	560406	454742	d__Bacteria	p__Firmicutes	c__Negativicutes	o__Selenomonadales	f__Selenomonadaceae	g__Selenomonas
d__Bacteria|p__Firmicutes|c__Negativicutes|o__Selenomonadales|f__Selenomonadaceae|g__Megamonas	3370	1851	2205	2595	2502	2547	2760	2048	1524	2667	1350	1825	d__Bacteria	p__Firmicutes	c__Negativicutes	o__Selenomonadales	f__Selenomonadaceae	g__Megamonas
d__Bacteria|p__Firmicutes|c__Negativicutes|o__Selenomonadales|f__Sporomusaceae|g__Pelosinus	771	1069	946	816	1251	3880	9974	4620	1602	5550	1439	2884	d__Bacteria	p__Firmicutes	c__Negativicutes	o__Selenomonadales	f__Sporomusaceae	g__Pelosinus
d__Bacteria|p__Firmicutes|c__Negativicutes|o__Veillonellales|f__Veillonellaceae|g__Dialister	5228	5242	5044	3853	4920	5654	6444	4975	4288	4836	3690	4236	d__Bacteria	p__Firmicutes	c__Negativicutes	o__Veillonellales	f__Veillonellaceae	g__Dialister
d__Bacteria|p__Firmicutes|c__Negativicutes|o__Veillonellales|f__Veillonellaceae|g__Megasphaera	2671	3354	3006	3053	3155	3144	3169	2599	2396	2854	2597	3293	d__Bacteria	p__Firmicutes	c__Negativicutes	o__Veillonellales	f__Veillonellaceae	g__Megasphaera
d__Bacteria|p__Firmicutes|c__Negativicutes|o__Veillonellales|f__Veillonellaceae|g__Veillonella	739	856	709	712	766	766	792	699	644	708	622	745	d__Bacteria	p__Firmicutes	c__Negativicutes	o__Veillonellales	f__Veillonellaceae	g__Veillonella
d__Bacteria|p__Firmicutes|c__Negativicutes|o__Veillonellales|f__Veillonellaceae|g__Negativicoccus	290	359	287	457	352	323	437	391	435	466	567	734	d__Bacteria	p__Firmicutes	c__Negativicutes	o__Veillonellales	f__Veillonellaceae	g__Negativicoccus
d__Bacteria|p__Firmicutes|c__Negativicutes|o__Acidaminococcales|f__Acidaminococcaceae|g__Acidaminococcus	3995	4811	5091	3843	4197	5789	3978	3193	3120	3813	2898	3727	d__Bacteria	p__Firmicutes	c__Negativicutes	o__Acidaminococcales	f__Acidaminococcaceae	g__Acidaminococcus
d__Bacteria|p__Firmicutes|c__Erysipelotrichia|o__Erysipelotrichales|f__Erysipelotrichaceae|g__Faecalibaculum	2152	3089	2408	2373	2590	2437	2546	1984	1951	2372	1856	2435	d__Bacteria	p__Firmicutes	c__Erysipelotrichia	o__Erysipelotrichales	f__Erysipelotrichaceae	g__Faecalibaculum
d__Bacteria|p__Firmicutes|c__Erysipelotrichia|o__Erysipelotrichales|f__Erysipelotrichaceae|g__Faecalitalea	1111	692	789	883	1260	1940	1498	2090	1244	1772	1236	1158	d__Bacteria	p__Firmicutes	c__Erysipelotrichia	o__Erysipelotrichales	f__Erysipelotrichaceae	g__Faecalitalea
d__Bacteria|p__Firmicutes|c__Erysipelotrichia|o__Erysipelotrichales|f__Erysipelotrichaceae|g__Erysipelothrix	1019	1135	1214	716	1135	1088	980	877	694	907	574	633	d__Bacteria	p__Firmicutes	c__Erysipelotrichia	o__Erysipelotrichales	f__Erysipelotrichaceae	g__Erysipelothrix
d__Bacteria|p__Firmicutes|c__Erysipelotrichia|o__Erysipelotrichales|f__Erysipelotrichaceae|g__Turicibacter	184	224	199	243	241	279	232	230	199	247	296	337	d__Bacteria	p__Firmicutes	c__Erysipelotrichia	o__Erysipelotrichales	f__Erysipelotrichaceae	g__Turicibacter
d__Bacteria|p__Firmicutes|c__Erysipelotrichia|o__Erysipelotrichales|f__Erysipelotrichaceae|s__Erysipelotrichaceae bacterium GAM147	49	50	57	55	64	91	71	51	62	69	91	89	d__Bacteria	p__Firmicutes	c__Erysipelotrichia	o__Erysipelotrichales	f__Erysipelotrichaceae	s__Erysipelotrichaceae bacterium GAM147
d__Bacteria|p__Firmicutes|c__Erysipelotrichia|o__Erysipelotrichales|f__Erysipelotrichaceae|s__Erysipelotrichaceae bacterium I46	2	4	4	3	1	4	6	3	3	6	2	7	d__Bacteria	p__Firmicutes	c__Erysipelotrichia	o__Erysipelotrichales	f__Erysipelotrichaceae	s__Erysipelotrichaceae bacterium I46
d__Bacteria|p__Firmicutes|c__Tissierellia|o__Tissierellales|f__Peptoniphilaceae|g__Peptoniphilus	1743	1111	1198	833	1172	577	289	357	479	260	329	255	d__Bacteria	p__Firmicutes	c__Tissierellia	o__Tissierellales	f__Peptoniphilaceae	g__Peptoniphilus
d__Bacteria|p__Firmicutes|c__Tissierellia|o__Tissierellales|f__Peptoniphilaceae|g__Murdochiella	288	419	346	350	357	385	316	307	298	341	320	388	d__Bacteria	p__Firmicutes	c__Tissierellia	o__Tissierellales	f__Peptoniphilaceae	g__Murdochiella
d__Bacteria|p__Firmicutes|c__Tissierellia|o__Tissierellales|f__Peptoniphilaceae|g__Anaerococcus	232	271	243	235	263	295	324	319	261	375	323	314	d__Bacteria	p__Firmicutes	c__Tissierellia	o__Tissierellales	f__Peptoniphilaceae	g__Anaerococcus
d__Bacteria|p__Firmicutes|c__Tissierellia|o__Tissierellales|f__Peptoniphilaceae|g__Finegoldia	149	177	182	173	194	279	306	227	258	326	313	357	d__Bacteria	p__Firmicutes	c__Tissierellia	o__Tissierellales	f__Peptoniphilaceae	g__Finegoldia
d__Bacteria|p__Firmicutes|c__Tissierellia|o__Tissierellales|f__Peptoniphilaceae|g__Parvimonas	118	135	149	149	126	184	167	138	134	171	176	236	d__Bacteria	p__Firmicutes	c__Tissierellia	o__Tissierellales	f__Peptoniphilaceae	g__Parvimonas
d__Bacteria|p__Firmicutes|c__Tissierellia|o__Tissierellales|f__Tissierellaceae|s__[Clostridium] ultunense	476	827	734	1077	524	656	361	253	286	292	445	627	d__Bacteria	p__Firmicutes	c__Tissierellia	o__Tissierellales	f__Tissierellaceae	s__[Clostridium] ultunense
d__Bacteria|p__Firmicutes|c__Tissierellia|o__Tissierellales|f__Gottschalkiaceae|g__Gottschalkia	188	373	346	475	317	432	230	219	214	242	387	490	d__Bacteria	p__Firmicutes	c__Tissierellia	o__Tissierellales	f__Gottschalkiaceae	g__Gottschalkia
d__Bacteria|p__Firmicutes|c__Limnochordia|o__Limnochordales|f__Limnochordaceae|g__Limnochorda	664	762	613	676	606	538	468	425	430	487	514	734	d__Bacteria	p__Firmicutes	c__Limnochordia	o__Limnochordales	f__Limnochordaceae	g__Limnochorda
d__Bacteria|p__Actinobacteria|c__Coriobacteriia|o__Coriobacteriales|f__Atopobiaceae|g__Olsenella	25713	24157	20205	19250	20569	20103	14498	16164	15248	15862	14232	16229	d__Bacteria	p__Actinobacteria	c__Coriobacteriia	o__Coriobacteriales	f__Atopobiaceae	g__Olsenella
d__Bacteria|p__Actinobacteria|c__Coriobacteriia|o__Coriobacteriales|f__Atopobiaceae|g__Libanicoccus	2747	5202	3948	4927	3424	4348	2851	2398	2579	2992	3574	4866	d__Bacteria	p__Actinobacteria	c__Coriobacteriia	o__Coriobacteriales	f__Atopobiaceae	g__Libanicoccus
d__Bacteria|p__Actinobacteria|c__Coriobacteriia|o__Coriobacteriales|f__Atopobiaceae|g__Atopobium	2234	2310	1923	1778	2098	1828	1567	1647	1336	1611	1203	1462	d__Bacteria	p__Actinobacteria	c__Coriobacteriia	o__Coriobacteriales	f__Atopobiaceae	g__Atopobium
d__Bacteria|p__Actinobacteria|c__Coriobacteriia|o__Coriobacteriales|f__Coriobacteriaceae|s__Coriobacteriaceae bacterium 68-1-3	6594	10044	8591	10725	6328	9907	4091	3267	3433	4107	5931	10626	d__Bacteria	p__Actinobacteria	c__Coriobacteriia	o__Coriobacteriales	f__Coriobacteriaceae	s__Coriobacteriaceae bacterium 68-1-3
d__Bacteria|p__Actinobacteria|c__Coriobacteriia|o__Coriobacteriales|f__Coriobacteriaceae|g__Collinsella	3302	5418	4488	4915	5336	4523	4223	4026	3949	4213	3945	6020	d__Bacteria	p__Actinobacteria	c__Coriobacteriia	o__Coriobacteriales	f__Coriobacteriaceae	g__Collinsella
d__Bacteria|p__Actinobacteria|c__Coriobacteriia|o__Coriobacteriales|f__Coriobacteriaceae|g__Coriobacterium	1849	2158	1752	1437	1780	1917	2063	1760	1486	2053	1264	1728	d__Bacteria	p__Actinobacteria	c__Coriobacteriia	o__Coriobacteriales	f__Coriobacteriaceae	g__Coriobacterium
d__Bacteria|p__Actinobacteria|c__Coriobacteriia|o__Eggerthellales|f__Eggerthellaceae|g__Slackia	7109	7958	6754	6041	6530	5785	4325	3947	3739	4539	3932	5449	d__Bacteria	p__Actinobacteria	c__Coriobacteriia	o__Eggerthellales	f__Eggerthellaceae	g__Slackia
d__Bacteria|p__Actinobacteria|c__Coriobacteriia|o__Eggerthellales|f__Eggerthellaceae|g__Gordonibacter	6847	8923	6721	6680	7541	6228	7172	5680	5121	7253	5538	9388	d__Bacteria	p__Actinobacteria	c__Coriobacteriia	o__Eggerthellales	f__Eggerthellaceae	g__Gordonibacter
d__Bacteria|p__Actinobacteria|c__Coriobacteriia|o__Eggerthellales|f__Eggerthellaceae|g__Cryptobacterium	5782	5000	5644	4475	4865	5768	4163	3625	2729	4119	2831	3652	d__Bacteria	p__Actinobacteria	c__Coriobacteriia	o__Eggerthellales	f__Eggerthellaceae	g__Cryptobacterium
d__Bacteria|p__Actinobacteria|c__Coriobacteriia|o__Eggerthellales|f__Eggerthellaceae|g__Eggerthella	2111	2718	2438	2332	2327	2405	2253	1882	1844	2306	1945	2596	d__Bacteria	p__Actinobacteria	c__Coriobacteriia	o__Eggerthellales	f__Eggerthellaceae	g__Eggerthella
d__Bacteria|p__Actinobacteria|c__Coriobacteriia|o__Eggerthellales|f__Eggerthellaceae|g__Denitrobacterium	1883	2343	1885	1864	2035	2009	2100	1713	1497	2207	1592	2717	d__Bacteria	p__Actinobacteria	c__Coriobacteriia	o__Eggerthellales	f__Eggerthellaceae	g__Denitrobacterium
d__Bacteria|p__Actinobacteria|c__Coriobacteriia|o__Eggerthellales|f__Eggerthellaceae|g__Adlercreutzia	1683	2562	1955	2482	1775	2264	1632	1313	1306	1650	2182	3451	d__Bacteria	p__Actinobacteria	c__Coriobacteriia	o__Eggerthellales	f__Eggerthellaceae	g__Adlercreutzia
d__Bacteria|p__Actinobacteria|c__Coriobacteriia|o__Eggerthellales|f__Eggerthellaceae|g__Phoenicibacter	299	416	385	341	317	401	281	229	215	273	246	351	d__Bacteria	p__Actinobacteria	c__Coriobacteriia	o__Eggerthellales	f__Eggerthellaceae	g__Phoenicibacter
d__Bacteria|p__Actinobacteria|c__Actinobacteria|o__Micrococcales|f__Microbacteriaceae|g__Leifsonia	5948	4785	4940	3146	5363	5491	4182	4292	2304	3271	2274	1995	d__Bacteria	p__Actinobacteria	c__Actinobacteria	o__Micrococcales	f__Microbacteriaceae	g__Leifsonia
d__Bacteria|p__Actinobacteria|c__Actinobacteria|o__Micrococcales|f__Microbacteriaceae|g__Microbacterium	1720	1738	1571	1651	1799	1603	1438	1346	1294	1414	1486	1537	d__Bacteria	p__Actinobacteria	c__Actinobacteria	o__Micrococcales	f__Microbacteriaceae	g__Microbacterium
d__Bacteria|p__Actinobacteria|c__Actinobacteria|o__Micrococcales|f__Microbacteriaceae|g__Agromyces	693	518	506	592	613	509	354	326	335	303	455	373	d__Bacteria	p__Actinobacteria	c__Actinobacteria	o__Micrococcales	f__Microbacteriaceae	g__Agromyces
d__Bacteria|p__Actinobacteria|c__Actinobacteria|o__Micrococcales|f__Microbacteriaceae|g__Rhodoluna	534	575	511	628	631	575	332	460	460	313	340	267	d__Bacteria	p__Actinobacteria	c__Actinobacteria	o__Micrococcales	f__Microbacteriaceae	g__Rhodoluna
d__Bacteria|p__Actinobacteria|c__Actinobacteria|o__Micrococcales|f__Microbacteriaceae|g__Candidatus Aquiluna	74	53	59	50	46	46	39	36	49	34	44	49	d__Bacteria	p__Actinobacteria	c__Actinobacteria	o__Micrococcales	f__Microbacteriaceae	g__Candidatus Aquiluna
d__Bacteria|p__Actinobacteria|c__Actinobacteria|o__Micrococcales|f__Microbacteriaceae|g__Aurantimicrobium	390	406	328	460	433	380	446	343	377	430	461	495	d__Bacteria	p__Actinobacteria	c__Actinobacteria	o__Micrococcales	f__Microbacteriaceae	g__Aurantimicrobium
d__Bacteria|p__Actinobacteria|c__Actinobacteria|o__Micrococcales|f__Microbacteriaceae|g__Clavibacter	253	291	242	261	270	219	250	217	209	229	234	317	d__Bacteria	p__Actinobacteria	c__Actinobacteria	o__Micrococcales	f__Microbacteriaceae	g__Clavibacter
d__Bacteria|p__Actinobacteria|c__Actinobacteria|o__Micrococcales|f__Microbacteriaceae|g__Curtobacterium	238	305	225	239	259	252	213	212	193	207	235	288	d__Bacteria	p__Actinobacteria	c__Actinobacteria	o__Micrococcales	f__Microbacteriaceae	g__Curtobacterium
d__Bacteria|p__Actinobacteria|c__Actinobacteria|o__Micrococcales|f__Microbacteriaceae|g__Rathayibacter	236	219	195	236	240	335	200	352	315	277	419	346	d__Bacteria	p__Actinobacteria	c__Actinobacteria	o__Micrococcales	f__Microbacteriaceae	g__Rathayibacter
d__Bacteria|p__Actinobacteria|c__Actinobacteria|o__Micrococcales|f__Microbacteriaceae|g__Cryobacterium	195	212	180	218	208	193	253	200	179	217	215	307	d__Bacteria	p__Actinobacteria	c__Actinobacteria	o__Micrococcales	f__Microbacteriaceae	g__Cryobacterium
d__Bacteria|p__Actinobacteria|c__Actinobacteria|o__Micrococcales|f__Microbacteriaceae|g__Agrococcus	187	217	231	241	272	219	256	213	195	213	183	220	d__Bacteria	p__Actinobacteria	c__Actinobacteria	o__Micrococcales	f__Microbacteriaceae	g__Agrococcus
d__Bacteria|p__Actinobacteria|c__Actinobacteria|o__Micrococcales|f__Microbacteriaceae|g__Microterricola	158	193	155	163	185	184	159	150	148	164	167	174	d__Bacteria	p__Actinobacteria	c__Actinobacteria	o__Micrococcales	f__Microbacteriaceae	g__Microterricola
d__Bacteria|p__Actinobacteria|c__Actinobacteria|o__Micrococcales|f__Microbacteriaceae|g__Frondihabitans	142	209	153	156	163	188	359	200	151	202	173	213	d__Bacteria	p__Actinobacteria	c__Actinobacteria	o__Micrococcales	f__Microbacteriaceae	g__Frondihabitans
d__Bacteria|p__Actinobacteria|c__Actinobacteria|o__Micrococcales|f__Microbacteriaceae|g__Plantibacter	135	131	123	140	157	151	114	117	121	137	144	215	d__Bacteria	p__Actinobacteria	c__Actinobacteria	o__Micrococcales	f__Microbacteriaceae	g__Plantibacter
d__Bacteria|p__Actinobacteria|c__Actinobacteria|o__Micrococcales|f__Microbacteriaceae|g__Mycetocola	92	109	74	85	98	92	61	57	50	61	49	98	d__Bacteria	p__Actinobacteria	c__Actinobacteria	o__Micrococcales	f__Microbacteriaceae	g__Mycetocola
d__Bacteria|p__Actinobacteria|c__Actinobacteria|o__Micrococcales|f__Microbacteriaceae|g__Microcella	86	48	39	62	51	56	38	33	34	23	44	53	d__Bacteria	p__Actinobacteria	c__Actinobacteria	o__Micrococcales	f__Microbacteriaceae	g__Microcella
d__Bacteria|p__Actinobacteria|c__Actinobacteria|o__Micrococcales|f__Microbacteriaceae|g__Salinibacterium	83	103	84	75	81	104	115	90	79	93	91	94	d__Bacteria	p__Actinobacteria	c__Actinobacteria	o__Micrococcales	f__Microbacteriaceae	g__Salinibacterium
d__Bacteria|p__Actinobacteria|c__Actinobacteria|o__Micrococcales|f__Microbacteriaceae|g__Cnuibacter	25	33	29	31	34	29	28	21	34	30	32	36	d__Bacteria	p__Actinobacteria	c__Actinobacteria	o__Micrococcales	f__Microbacteriaceae	g__Cnuibacter
d__Bacteria|p__Actinobacteria|c__Actinobacteria|o__Micrococcales|f__Microbacteriaceae|g__Pontimonas	20	31	19	23	26	17	24	18	27	29	33	27	d__Bacteria	p__Actinobacteria	c__Actinobacteria	o__Micrococcales	f__Microbacteriaceae	g__Pontimonas
d__Bacteria|p__Actinobacteria|c__Actinobacteria|o__Micrococcales|f__Microbacteriaceae|g__Humibacter	14	16	8	13	15	10	8	12	6	7	20	16	d__Bacteria	p__Actinobacteria	c__Actinobacteria	o__Micrococcales	f__Microbacteriaceae	g__Humibacter
d__Bacteria|p__Actinobacteria|c__Actinobacteria|o__Micrococcales|f__Micrococcaceae|g__Renibacterium	2411	2194	2370	1981	3063	1237	2418	1778	1662	1588	1186	1148	d__Bacteria	p__Actinobacteria	c__Actinobacteria	o__Micrococcales	f__Micrococcaceae	g__Renibacterium
d__Bacteria|p__Actinobacteria|c__Actinobacteria|o__Micrococcales|f__Micrococcaceae|g__Arthrobacter	1787	1879	1540	1751	1787	1843	1742	1787	1477	1629	1654	1777	d__Bacteria	p__Actinobacteria	c__Actinobacteria	o__Micrococcales	f__Micrococcaceae	g__Arthrobacter
d__Bacteria|p__Actinobacteria|c__Actinobacteria|o__Micrococcales|f__Micrococcaceae|g__Kocuria	521	644	569	709	617	623	720	669	551	705	720	820	d__Bacteria	p__Actinobacteria	c__Actinobacteria	o__Micrococcales	f__Micrococcaceae	g__Kocuria
d__Bacteria|p__Actinobacteria|c__Actinobacteria|o__Micrococcales|f__Micrococcaceae|g__Glutamicibacter	394	258	180	209	233	210	305	276	211	239	213	334	d__Bacteria	p__Actinobacteria	c__Actinobacteria	o__Micrococcales	f__Micrococcaceae	g__Glutamicibacter
d__Bacteria|p__Actinobacteria|c__Actinobacteria|o__Micrococcales|f__Micrococcaceae|g__Pseudarthrobacter	349	350	298	317	330	335	327	272	249	291	282	306	d__Bacteria	p__Actinobacteria	c__Actinobacteria	o__Micrococcales	f__Micrococcaceae	g__Pseudarthrobacter
d__Bacteria|p__Actinobacteria|c__Actinobacteria|o__Micrococcales|f__Micrococcaceae|g__Rothia	336	322	262	305	372	322	422	350	311	404	412	400	d__Bacteria	p__Actinobacteria	c__Actinobacteria	o__Micrococcales	f__Micrococcaceae	g__Rothia
d__Bacteria|p__Actinobacteria|c__Actinobacteria|o__Micrococcales|f__Micrococcaceae|g__Micrococcus	197	197	138	360	153	151	176	143	126	158	136	166	d__Bacteria	p__Actinobacteria	c__Actinobacteria	o__Micrococcales	f__Micrococcaceae	g__Micrococcus
d__Bacteria|p__Actinobacteria|c__Actinobacteria|o__Micrococcales|f__Micrococcaceae|g__Zhihengliuella	140	80	59	99	84	53	36	32	53	34	85	40	d__Bacteria	p__Actinobacteria	c__Actinobacteria	o__Micrococcales	f__Micrococcaceae	g__Zhihengliuella
d__Bacteria|p__Actinobacteria|c__Actinobacteria|o__Micrococcales|f__Micrococcaceae|g__Neomicrococcus	124	136	102	121	122	99	92	105	124	119	122	150	d__Bacteria	p__Actinobacteria	c__Actinobacteria	o__Micrococcales	f__Micrococcaceae	g__Neomicrococcus
d__Bacteria|p__Actinobacteria|c__Actinobacteria|o__Micrococcales|f__Micrococcaceae|g__Auritidibacter	111	160	120	137	175	158	210	171	171	141	139	157	d__Bacteria	p__Actinobacteria	c__Actinobacteria	o__Micrococcales	f__Micrococcaceae	g__Auritidibacter
d__Bacteria|p__Actinobacteria|c__Actinobacteria|o__Micrococcales|f__Micrococcaceae|g__Sinomonas	67	82	72	67	77	83	72	68	90	47	67	67	d__Bacteria	p__Actinobacteria	c__Actinobacteria	o__Micrococcales	f__Micrococcaceae	g__Sinomonas
d__Bacteria|p__Actinobacteria|c__Actinobacteria|o__Micrococcales|f__Micrococcaceae|g__Psychromicrobium	45	54	52	76	70	41	61	32	43	39	50	79	d__Bacteria	p__Actinobacteria	c__Actinobacteria	o__Micrococcales	f__Micrococcaceae	g__Psychromicrobium
d__Bacteria|p__Actinobacteria|c__Actinobacteria|o__Micrococcales|f__Micrococcaceae|g__Paenarthrobacter	19	14	15	12	11	10	11	12	9	16	13	9	d__Bacteria	p__Actinobacteria	c__Actinobacteria	o__Micrococcales	f__Micrococcaceae	g__Paenarthrobacter
d__Bacteria|p__Actinobacteria|c__Actinobacteria|o__Micrococcales|f__Cellulomonadaceae|g__Cellulomonas	2511	3255	2736	2304	2660	2052	1534	2086	2585	2208	2359	2314	d__Bacteria	p__Actinobacteria	c__Actinobacteria	o__Micrococcales	f__Cellulomonadaceae	g__Cellulomonas
d__Bacteria|p__Actinobacteria|c__Actinobacteria|o__Micrococcales|f__Cellulomonadaceae|g__Paraoerskovia	36	61	45	55	51	47	39	46	47	45	43	59	d__Bacteria	p__Actinobacteria	c__Actinobacteria	o__Micrococcales	f__Cellulomonadaceae	g__Paraoerskovia
d__Bacteria|p__Actinobacteria|c__Actinobacteria|o__Micrococcales|f__Dermabacteraceae|g__Brachybacterium	734	919	771	766	864	740	782	638	668	715	708	818	d__Bacteria	p__Actinobacteria	c__Actinobacteria	o__Micrococcales	f__Dermabacteraceae	g__Brachybacterium
d__Bacteria|p__Actinobacteria|c__Actinobacteria|o__Micrococcales|f__Dermabacteraceae|g__Devriesea	175	139	135	131	144	107	69	75	91	70	116	69	d__Bacteria	p__Actinobacteria	c__Actinobacteria	o__Micrococcales	f__Dermabacteraceae	g__Devriesea
d__Bacteria|p__Actinobacteria|c__Actinobacteria|o__Micrococcales|f__Dermabacteraceae|g__Dermabacter	131	119	92	99	118	117	140	107	120	142	122	137	d__Bacteria	p__Actinobacteria	c__Actinobacteria	o__Micrococcales	f__Dermabacteraceae	g__Dermabacter
d__Bacteria|p__Actinobacteria|c__Actinobacteria|o__Micrococcales|f__Intrasporangiaceae|g__Phycicoccus	214	200	177	249	235	107	75	91	165	92	159	89	d__Bacteria	p__Actinobacteria	c__Actinobacteria	o__Micrococcales	f__Intrasporangiaceae	g__Phycicoccus
d__Bacteria|p__Actinobacteria|c__Actinobacteria|o__Micrococcales|f__Intrasporangiaceae|g__Ornithinimicrobium	208	180	170	162	149	167	117	145	138	173	158	158	d__Bacteria	p__Actinobacteria	c__Actinobacteria	o__Micrococcales	f__Intrasporangiaceae	g__Ornithinimicrobium
d__Bacteria|p__Actinobacteria|c__Actinobacteria|o__Micrococcales|f__Intrasporangiaceae|g__Arsenicicoccus	80	78	79	70	91	119	103	76	89	102	88	105	d__Bacteria	p__Actinobacteria	c__Actinobacteria	o__Micrococcales	f__Intrasporangiaceae	g__Arsenicicoccus
d__Bacteria|p__Actinobacteria|c__Actinobacteria|o__Micrococcales|f__Intrasporangiaceae|g__Intrasporangium	75	109	73	99	88	89	95	86	80	98	82	106	d__Bacteria	p__Actinobacteria	c__Actinobacteria	o__Micrococcales	f__Intrasporangiaceae	g__Intrasporangium
d__Bacteria|p__Actinobacteria|c__Actinobacteria|o__Micrococcales|f__Intrasporangiaceae|g__Janibacter	69	121	79	116	73	80	99	65	95	91	89	116	d__Bacteria	p__Actinobacteria	c__Actinobacteria	o__Micrococcales	f__Intrasporangiaceae	g__Janibacter
d__Bacteria|p__Actinobacteria|c__Actinobacteria|o__Micrococcales|f__Intrasporangiaceae|g__Serinicoccus	46	61	48	44	49	45	59	43	44	47	59	61	d__Bacteria	p__Actinobacteria	c__Actinobacteria	o__Micrococcales	f__Intrasporangiaceae	g__Serinicoccus
d__Bacteria|p__Actinobacteria|c__Actinobacteria|o__Micrococcales|f__Promicromonosporaceae|g__Isoptericola	184	218	181	167	202	162	167	174	135	181	175	208	d__Bacteria	p__Actinobacteria	c__Actinobacteria	o__Micrococcales	f__Promicromonosporaceae	g__Isoptericola
d__Bacteria|p__Actinobacteria|c__Actinobacteria|o__Micrococcales|f__Promicromonosporaceae|g__Cellulosimicrobium	134	160	148	159	166	144	148	134	119	130	124	204	d__Bacteria	p__Actinobacteria	c__Actinobacteria	o__Micrococcales	f__Promicromonosporaceae	g__Cellulosimicrobium
d__Bacteria|p__Actinobacteria|c__Actinobacteria|o__Micrococcales|f__Promicromonosporaceae|g__Xylanimonas	131	165	164	154	130	263	163	163	120	163	171	207	d__Bacteria	p__Actinobacteria	c__Actinobacteria	o__Micrococcales	f__Promicromonosporaceae	g__Xylanimonas
d__Bacteria|p__Actinobacteria|c__Actinobacteria|o__Micrococcales|f__Brevibacteriaceae|g__Brevibacterium	427	482	384	442	441	399	371	360	367	443	415	503	d__Bacteria	p__Actinobacteria	c__Actinobacteria	o__Micrococcales	f__Brevibacteriaceae	g__Brevibacterium
d__Bacteria|p__Actinobacteria|c__Actinobacteria|o__Micrococcales|f__Beutenbergiaceae|g__Miniimonas	194	156	163	199	199	170	134	192	145	147	224	179	d__Bacteria	p__Actinobacteria	c__Actinobacteria	o__Micrococcales	f__Beutenbergiaceae	g__Miniimonas
d__Bacteria|p__Actinobacteria|c__Actinobacteria|o__Micrococcales|f__Beutenbergiaceae|g__Beutenbergia	90	118	76	104	88	101	76	89	102	87	84	91	d__Bacteria	p__Actinobacteria	c__Actinobacteria	o__Micrococcales	f__Beutenbergiaceae	g__Beutenbergia
d__Bacteria|p__Actinobacteria|c__Actinobacteria|o__Micrococcales|f__Dermacoccaceae|g__Luteipulveratus	104	124	91	104	109	94	115	81	102	103	93	123	d__Bacteria	p__Actinobacteria	c__Actinobacteria	o__Micrococcales	f__Dermacoccaceae	g__Luteipulveratus
d__Bacteria|p__Actinobacteria|c__Actinobacteria|o__Micrococcales|f__Dermacoccaceae|g__Dermacoccus	88	111	117	110	107	69	106	71	66	102	83	123	d__Bacteria	p__Actinobacteria	c__Actinobacteria	o__Micrococcales	f__Dermacoccaceae	g__Dermacoccus
d__Bacteria|p__Actinobacteria|c__Actinobacteria|o__Micrococcales|f__Dermacoccaceae|g__Kytococcus	87	105	89	90	95	83	88	86	94	94	70	118	d__Bacteria	p__Actinobacteria	c__Actinobacteria	o__Micrococcales	f__Dermacoccaceae	g__Kytococcus
d__Bacteria|p__Actinobacteria|c__Actinobacteria|o__Micrococcales|f__Dermatophilaceae|g__Dermatophilus	203	300	220	264	238	427	330	315	281	304	297	363	d__Bacteria	p__Actinobacteria	c__Actinobacteria	o__Micrococcales	f__Dermatophilaceae	g__Dermatophilus
d__Bacteria|p__Actinobacteria|c__Actinobacteria|o__Micrococcales|f__Dermatophilaceae|g__Austwickia	71	76	78	77	59	75	51	59	73	71	59	80	d__Bacteria	p__Actinobacteria	c__Actinobacteria	o__Micrococcales	f__Dermatophilaceae	g__Austwickia
d__Bacteria|p__Actinobacteria|c__Actinobacteria|o__Micrococcales|f__Sanguibacteraceae|g__Sanguibacter	89	93	66	84	103	88	83	56	61	59	81	76	d__Bacteria	p__Actinobacteria	c__Actinobacteria	o__Micrococcales	f__Sanguibacteraceae	g__Sanguibacter
d__Bacteria|p__Actinobacteria|c__Actinobacteria|o__Micrococcales|f__Jonesiaceae|g__Jonesia	76	92	78	89	87	74	61	55	63	58	94	88	d__Bacteria	p__Actinobacteria	c__Actinobacteria	o__Micrococcales	f__Jonesiaceae	g__Jonesia
d__Bacteria|p__Actinobacteria|c__Actinobacteria|o__Micrococcales|g__Tropheryma|s__Tropheryma whipplei	67	50	40	68	80	21	19	19	44	20	40	24	d__Bacteria	p__Actinobacteria	c__Actinobacteria	o__Micrococcales	g__Tropheryma	s__Tropheryma whipplei
d__Bacteria|p__Actinobacteria|c__Actinobacteria|o__Corynebacteriales|f__Corynebacteriaceae|g__Corynebacterium	9868	11709	9870	10922	11616	10560	10270	8435	8167	10351	9167	12418	d__Bacteria	p__Actinobacteria	c__Actinobacteria	o__Corynebacteriales	f__Corynebacteriaceae	g__Corynebacterium
d__Bacteria|p__Actinobacteria|c__Actinobacteria|o__Corynebacteriales|f__Mycobacteriaceae|g__Mycobacterium	2425	2788	2284	2636	2540	2700	2568	2030	2046	2151	2445	2695	d__Bacteria	p__Actinobacteria	c__Actinobacteria	o__Corynebacteriales	f__Mycobacteriaceae	g__Mycobacterium
d__Bacteria|p__Actinobacteria|c__Actinobacteria|o__Corynebacteriales|f__Mycobacteriaceae|g__Mycolicibacterium	1364	1646	1259	1408	1563	1380	1316	1269	1328	1418	1392	1577	d__Bacteria	p__Actinobacteria	c__Actinobacteria	o__Corynebacteriales	f__Mycobacteriaceae	g__Mycolicibacterium
d__Bacteria|p__Actinobacteria|c__Actinobacteria|o__Corynebacteriales|f__Mycobacteriaceae|g__Mycobacteroides	365	573	396	470	405	342	320	295	334	329	368	400	d__Bacteria	p__Actinobacteria	c__Actinobacteria	o__Corynebacteriales	f__Mycobacteriaceae	g__Mycobacteroides
d__Bacteria|p__Actinobacteria|c__Actinobacteria|o__Corynebacteriales|f__Mycobacteriaceae|g__Mycolicibacter	116	133	102	130	144	135	112	92	101	101	112	121	d__Bacteria	p__Actinobacteria	c__Actinobacteria	o__Corynebacteriales	f__Mycobacteriaceae	g__Mycolicibacter
d__Bacteria|p__Actinobacteria|c__Actinobacteria|o__Corynebacteriales|f__Mycobacteriaceae|g__Hoyosella	114	72	81	66	79	90	76	94	92	78	73	79	d__Bacteria	p__Actinobacteria	c__Actinobacteria	o__Corynebacteriales	f__Mycobacteriaceae	g__Hoyosella
d__Bacteria|p__Actinobacteria|c__Actinobacteria|o__Corynebacteriales|f__Nocardiaceae|g__Rhodococcus	1575	1803	1540	1797	1757	1667	1666	1425	1435	1533	1514	1869	d__Bacteria	p__Actinobacteria	c__Actinobacteria	o__Corynebacteriales	f__Nocardiaceae	g__Rhodococcus
d__Bacteria|p__Actinobacteria|c__Actinobacteria|o__Corynebacteriales|f__Nocardiaceae|g__Nocardia	964	1015	908	1012	1023	857	977	781	820	863	781	954	d__Bacteria	p__Actinobacteria	c__Actinobacteria	o__Corynebacteriales	f__Nocardiaceae	g__Nocardia
d__Bacteria|p__Actinobacteria|c__Actinobacteria|o__Corynebacteriales|g__Lawsonella|s__Lawsonella clevelandensis	1293	1375	1249	1264	1404	1305	810	730	695	1081	787	1567	d__Bacteria	p__Actinobacteria	c__Actinobacteria	o__Corynebacteriales	g__Lawsonella	s__Lawsonella clevelandensis
d__Bacteria|p__Actinobacteria|c__Actinobacteria|o__Corynebacteriales|f__Gordoniaceae|g__Gordonia	697	870	688	746	793	811	962	861	691	953	691	1040	d__Bacteria	p__Actinobacteria	c__Actinobacteria	o__Corynebacteriales	f__Gordoniaceae	g__Gordonia
d__Bacteria|p__Actinobacteria|c__Actinobacteria|o__Corynebacteriales|f__Dietziaceae|g__Dietzia	445	573	426	481	439	426	486	376	410	415	392	444	d__Bacteria	p__Actinobacteria	c__Actinobacteria	o__Corynebacteriales	f__Dietziaceae	g__Dietzia
d__Bacteria|p__Actinobacteria|c__Actinobacteria|o__Corynebacteriales|f__Tsukamurellaceae|g__Tsukamurella	282	299	189	256	246	248	271	216	204	250	217	316	d__Bacteria	p__Actinobacteria	c__Actinobacteria	o__Corynebacteriales	f__Tsukamurellaceae	g__Tsukamurella
d__Bacteria|p__Actinobacteria|c__Actinobacteria|o__Corynebacteriales|f__Segniliparaceae|g__Segniliparus	83	118	93	158	111	103	111	77	84	95	103	114	d__Bacteria	p__Actinobacteria	c__Actinobacteria	o__Corynebacteriales	f__Segniliparaceae	g__Segniliparus
d__Bacteria|p__Actinobacteria|c__Actinobacteria|o__Streptomycetales|f__Streptomycetaceae|g__Streptomyces	13403	15335	12620	14427	14543	13794	13852	12348	11544	12997	12746	15029	d__Bacteria	p__Actinobacteria	c__Actinobacteria	o__Streptomycetales	f__Streptomycetaceae	g__Streptomyces
d__Bacteria|p__Actinobacteria|c__Actinobacteria|o__Streptomycetales|f__Streptomycetaceae|g__Kitasatospora	547	563	497	566	567	417	426	356	424	416	466	468	d__Bacteria	p__Actinobacteria	c__Actinobacteria	o__Streptomycetales	f__Streptomycetaceae	g__Kitasatospora
d__Bacteria|p__Actinobacteria|c__Actinobacteria|o__Streptomycetales|f__Streptomycetaceae|g__Streptacidiphilus	89	98	77	91	111	89	151	105	80	130	116	166	d__Bacteria	p__Actinobacteria	c__Actinobacteria	o__Streptomycetales	f__Streptomycetaceae	g__Streptacidiphilus
d__Bacteria|p__Actinobacteria|c__Actinobacteria|o__Propionibacteriales|f__Propionibacteriaceae|g__Cutibacterium	1831	2404	1743	1835	1781	1727	2506	1675	1465	1909	1818	2663	d__Bacteria	p__Actinobacteria	c__Actinobacteria	o__Propionibacteriales	f__Propionibacteriaceae	g__Cutibacterium
d__Bacteria|p__Actinobacteria|c__Actinobacteria|o__Propionibacteriales|f__Propionibacteriaceae|g__Tessaracoccus	1327	1650	1246	1507	1484	1172	1244	1083	1172	1345	1253	1605	d__Bacteria	p__Actinobacteria	c__Actinobacteria	o__Propionibacteriales	f__Propionibacteriaceae	g__Tessaracoccus
d__Bacteria|p__Actinobacteria|c__Actinobacteria|o__Propionibacteriales|f__Propionibacteriaceae|g__Acidipropionibacterium	459	497	393	447	455	374	333	313	330	335	324	437	d__Bacteria	p__Actinobacteria	c__Actinobacteria	o__Propionibacteriales	f__Propionibacteriaceae	g__Acidipropionibacterium
d__Bacteria|p__Actinobacteria|c__Actinobacteria|o__Propionibacteriales|f__Propionibacteriaceae|g__Propionimicrobium	324	293	286	218	327	326	288	277	286	254	300	230	d__Bacteria	p__Actinobacteria	c__Actinobacteria	o__Propionibacteriales	f__Propionibacteriaceae	g__Propionimicrobium
d__Bacteria|p__Actinobacteria|c__Actinobacteria|o__Propionibacteriales|f__Propionibacteriaceae|g__Auraticoccus	273	262	212	225	254	176	125	162	158	113	153	158	d__Bacteria	p__Actinobacteria	c__Actinobacteria	o__Propionibacteriales	f__Propionibacteriaceae	g__Auraticoccus
d__Bacteria|p__Actinobacteria|c__Actinobacteria|o__Propionibacteriales|f__Propionibacteriaceae|g__Propionibacterium	242	317	259	269	309	236	318	235	273	310	286	333	d__Bacteria	p__Actinobacteria	c__Actinobacteria	o__Propionibacteriales	f__Propionibacteriaceae	g__Propionibacterium
d__Bacteria|p__Actinobacteria|c__Actinobacteria|o__Propionibacteriales|f__Propionibacteriaceae|g__Microlunatus	226	299	193	232	247	173	215	214	184	207	198	240	d__Bacteria	p__Actinobacteria	c__Actinobacteria	o__Propionibacteriales	f__Propionibacteriaceae	g__Microlunatus
d__Bacteria|p__Actinobacteria|c__Actinobacteria|o__Propionibacteriales|f__Propionibacteriaceae|g__Pseudopropionibacterium	129	162	121	127	114	148	226	138	135	160	112	198	d__Bacteria	p__Actinobacteria	c__Actinobacteria	o__Propionibacteriales	f__Propionibacteriaceae	g__Pseudopropionibacterium
d__Bacteria|p__Actinobacteria|c__Actinobacteria|o__Propionibacteriales|f__Nocardioidaceae|g__Nocardioides	1777	3431	2701	2684	2925	5488	7035	6474	3852	7434	7509	8704	d__Bacteria	p__Actinobacteria	c__Actinobacteria	o__Propionibacteriales	f__Nocardioidaceae	g__Nocardioides
d__Bacteria|p__Actinobacteria|c__Actinobacteria|o__Propionibacteriales|f__Nocardioidaceae|g__Pimelobacter	667	475	488	405	521	555	358	392	305	367	352	322	d__Bacteria	p__Actinobacteria	c__Actinobacteria	o__Propionibacteriales	f__Nocardioidaceae	g__Pimelobacter
d__Bacteria|p__Actinobacteria|c__Actinobacteria|o__Propionibacteriales|f__Nocardioidaceae|g__Aeromicrobium	457	479	394	457	461	498	518	471	392	508	454	548	d__Bacteria	p__Actinobacteria	c__Actinobacteria	o__Propionibacteriales	f__Nocardioidaceae	g__Aeromicrobium
d__Bacteria|p__Actinobacteria|c__Actinobacteria|o__Propionibacteriales|f__Nocardioidaceae|g__Friedmanniella	290	303	257	329	320	261	286	223	288	298	324	354	d__Bacteria	p__Actinobacteria	c__Actinobacteria	o__Propionibacteriales	f__Nocardioidaceae	g__Friedmanniella
d__Bacteria|p__Actinobacteria|c__Actinobacteria|o__Propionibacteriales|f__Nocardioidaceae|g__Marmoricola	195	177	127	134	158	133	97	89	118	130	121	117	d__Bacteria	p__Actinobacteria	c__Actinobacteria	o__Propionibacteriales	f__Nocardioidaceae	g__Marmoricola
d__Bacteria|p__Actinobacteria|c__Actinobacteria|o__Propionibacteriales|f__Nocardioidaceae|g__Micropruina	171	232	185	249	194	180	148	144	124	162	180	182	d__Bacteria	p__Actinobacteria	c__Actinobacteria	o__Propionibacteriales	f__Nocardioidaceae	g__Micropruina
d__Bacteria|p__Actinobacteria|c__Actinobacteria|o__Propionibacteriales|f__Nocardioidaceae|g__Actinopolymorpha	123	114	103	117	123	134	137	125	84	115	102	120	d__Bacteria	p__Actinobacteria	c__Actinobacteria	o__Propionibacteriales	f__Nocardioidaceae	g__Actinopolymorpha
d__Bacteria|p__Actinobacteria|c__Actinobacteria|o__Propionibacteriales|f__Nocardioidaceae|g__Kribbella	82	72	94	84	86	72	90	75	63	69	88	93	d__Bacteria	p__Actinobacteria	c__Actinobacteria	o__Propionibacteriales	f__Nocardioidaceae	g__Kribbella
d__Bacteria|p__Actinobacteria|c__Actinobacteria|o__Bifidobacteriales|f__Bifidobacteriaceae|g__Bifidobacterium	5879	6861	6201	6947	7305	5916	6631	5754	4997	5995	5816	6900	d__Bacteria	p__Actinobacteria	c__Actinobacteria	o__Bifidobacteriales	f__Bifidobacteriaceae	g__Bifidobacterium
d__Bacteria|p__Actinobacteria|c__Actinobacteria|o__Bifidobacteriales|f__Bifidobacteriaceae|g__Parascardovia	194	220	168	187	215	194	163	190	176	219	208	184	d__Bacteria	p__Actinobacteria	c__Actinobacteria	o__Bifidobacteriales	f__Bifidobacteriaceae	g__Parascardovia
d__Bacteria|p__Actinobacteria|c__Actinobacteria|o__Bifidobacteriales|f__Bifidobacteriaceae|g__Gardnerella	166	127	111	144	125	176	268	273	144	191	186	211	d__Bacteria	p__Actinobacteria	c__Actinobacteria	o__Bifidobacteriales	f__Bifidobacteriaceae	g__Gardnerella
d__Bacteria|p__Actinobacteria|c__Actinobacteria|o__Bifidobacteriales|f__Bifidobacteriaceae|g__Scardovia	62	76	63	58	77	101	112	105	68	104	90	80	d__Bacteria	p__Actinobacteria	c__Actinobacteria	o__Bifidobacteriales	f__Bifidobacteriaceae	g__Scardovia
d__Bacteria|p__Actinobacteria|c__Actinobacteria|o__Actinomycetales|f__Actinomycetaceae|g__Actinomyces	4351	4310	5098	3767	6971	4110	2600	2419	2640	2528	2737	2975	d__Bacteria	p__Actinobacteria	c__Actinobacteria	o__Actinomycetales	f__Actinomycetaceae	g__Actinomyces
d__Bacteria|p__Actinobacteria|c__Actinobacteria|o__Actinomycetales|f__Actinomycetaceae|g__Actinotignum	442	439	345	400	426	709	1006	714	368	730	424	524	d__Bacteria	p__Actinobacteria	c__Actinobacteria	o__Actinomycetales	f__Actinomycetaceae	g__Actinotignum
d__Bacteria|p__Actinobacteria|c__Actinobacteria|o__Actinomycetales|f__Actinomycetaceae|g__Trueperella	178	150	135	157	174	153	202	149	146	175	145	190	d__Bacteria	p__Actinobacteria	c__Actinobacteria	o__Actinomycetales	f__Actinomycetaceae	g__Trueperella
d__Bacteria|p__Actinobacteria|c__Actinobacteria|o__Actinomycetales|f__Actinomycetaceae|g__Mobiluncus	167	138	99	139	152	128	158	133	103	122	122	112	d__Bacteria	p__Actinobacteria	c__Actinobacteria	o__Actinomycetales	f__Actinomycetaceae	g__Mobiluncus
d__Bacteria|p__Actinobacteria|c__Actinobacteria|o__Actinomycetales|f__Actinomycetaceae|g__Arcanobacterium	119	151	110	139	176	198	221	193	150	225	167	210	d__Bacteria	p__Actinobacteria	c__Actinobacteria	o__Actinomycetales	f__Actinomycetaceae	g__Arcanobacterium
d__Bacteria|p__Actinobacteria|c__Actinobacteria|o__Micromonosporales|f__Micromonosporaceae|g__Micromonospora	1951	2368	1927	2081	2127	1877	2040	1854	1786	1837	1875	2074	d__Bacteria	p__Actinobacteria	c__Actinobacteria	o__Micromonosporales	f__Micromonosporaceae	g__Micromonospora
d__Bacteria|p__Actinobacteria|c__Actinobacteria|o__Micromonosporales|f__Micromonosporaceae|g__Actinoplanes	1393	1367	1202	1211	1303	1086	1052	907	874	1006	1030	1073	d__Bacteria	p__Actinobacteria	c__Actinobacteria	o__Micromonosporales	f__Micromonosporaceae	g__Actinoplanes
d__Bacteria|p__Actinobacteria|c__Actinobacteria|o__Micromonosporales|f__Micromonosporaceae|g__Plantactinospora	572	544	443	652	548	484	484	448	391	456	810	914	d__Bacteria	p__Actinobacteria	c__Actinobacteria	o__Micromonosporales	f__Micromonosporaceae	g__Plantactinospora
d__Bacteria|p__Actinobacteria|c__Actinobacteria|o__Micromonosporales|f__Micromonosporaceae|g__Verrucosispora	181	240	176	230	180	158	131	150	148	147	132	223	d__Bacteria	p__Actinobacteria	c__Actinobacteria	o__Micromonosporales	f__Micromonosporaceae	g__Verrucosispora
d__Bacteria|p__Actinobacteria|c__Actinobacteria|o__Micromonosporales|f__Micromonosporaceae|g__Salinispora	74	91	74	96	88	83	105	80	88	105	83	103	d__Bacteria	p__Actinobacteria	c__Actinobacteria	o__Micromonosporales	f__Micromonosporaceae	g__Salinispora
d__Bacteria|p__Actinobacteria|c__Actinobacteria|o__Pseudonocardiales|f__Pseudonocardiaceae|g__Amycolatopsis	817	977	771	860	937	873	846	792	776	848	849	948	d__Bacteria	p__Actinobacteria	c__Actinobacteria	o__Pseudonocardiales	f__Pseudonocardiaceae	g__Amycolatopsis
d__Bacteria|p__Actinobacteria|c__Actinobacteria|o__Pseudonocardiales|f__Pseudonocardiaceae|g__Pseudonocardia	541	755	600	723	649	655	570	646	654	661	698	675	d__Bacteria	p__Actinobacteria	c__Actinobacteria	o__Pseudonocardiales	f__Pseudonocardiaceae	g__Pseudonocardia
d__Bacteria|p__Actinobacteria|c__Actinobacteria|o__Pseudonocardiales|f__Pseudonocardiaceae|g__Saccharopolyspora	475	407	383	341	455	419	378	297	242	333	238	346	d__Bacteria	p__Actinobacteria	c__Actinobacteria	o__Pseudonocardiales	f__Pseudonocardiaceae	g__Saccharopolyspora
d__Bacteria|p__Actinobacteria|c__Actinobacteria|o__Pseudonocardiales|f__Pseudonocardiaceae|g__Actinoalloteichus	435	532	440	522	426	442	522	445	391	586	518	707	d__Bacteria	p__Actinobacteria	c__Actinobacteria	o__Pseudonocardiales	f__Pseudonocardiaceae	g__Actinoalloteichus
d__Bacteria|p__Actinobacteria|c__Actinobacteria|o__Pseudonocardiales|f__Pseudonocardiaceae|g__Prauserella	363	348	326	262	366	291	208	207	191	270	189	225	d__Bacteria	p__Actinobacteria	c__Actinobacteria	o__Pseudonocardiales	f__Pseudonocardiaceae	g__Prauserella
d__Bacteria|p__Actinobacteria|c__Actinobacteria|o__Pseudonocardiales|f__Pseudonocardiaceae|g__Saccharomonospora	319	359	295	305	321	339	316	302	296	310	287	370	d__Bacteria	p__Actinobacteria	c__Actinobacteria	o__Pseudonocardiales	f__Pseudonocardiaceae	g__Saccharomonospora
d__Bacteria|p__Actinobacteria|c__Actinobacteria|o__Pseudonocardiales|f__Pseudonocardiaceae|g__Kibdelosporangium	244	251	181	247	234	223	235	207	251	225	240	292	d__Bacteria	p__Actinobacteria	c__Actinobacteria	o__Pseudonocardiales	f__Pseudonocardiaceae	g__Kibdelosporangium
d__Bacteria|p__Actinobacteria|c__Actinobacteria|o__Pseudonocardiales|f__Pseudonocardiaceae|g__Kutzneria	173	146	126	128	119	166	140	119	123	114	121	134	d__Bacteria	p__Actinobacteria	c__Actinobacteria	o__Pseudonocardiales	f__Pseudonocardiaceae	g__Kutzneria
d__Bacteria|p__Actinobacteria|c__Actinobacteria|o__Pseudonocardiales|f__Pseudonocardiaceae|g__Lentzea	166	177	136	157	132	140	85	125	118	99	114	114	d__Bacteria	p__Actinobacteria	c__Actinobacteria	o__Pseudonocardiales	f__Pseudonocardiaceae	g__Lentzea
d__Bacteria|p__Actinobacteria|c__Actinobacteria|o__Pseudonocardiales|f__Pseudonocardiaceae|g__Actinosynnema	165	188	150	149	173	173	177	172	123	182	153	208	d__Bacteria	p__Actinobacteria	c__Actinobacteria	o__Pseudonocardiales	f__Pseudonocardiaceae	g__Actinosynnema
d__Bacteria|p__Actinobacteria|c__Actinobacteria|o__Pseudonocardiales|f__Pseudonocardiaceae|g__Saccharothrix	136	128	127	132	137	164	149	145	108	147	149	171	d__Bacteria	p__Actinobacteria	c__Actinobacteria	o__Pseudonocardiales	f__Pseudonocardiaceae	g__Saccharothrix
d__Bacteria|p__Actinobacteria|c__Actinobacteria|o__Pseudonocardiales|f__Pseudonocardiaceae|g__Allokutzneria	108	106	112	113	125	109	123	116	124	120	108	133	d__Bacteria	p__Actinobacteria	c__Actinobacteria	o__Pseudonocardiales	f__Pseudonocardiaceae	g__Allokutzneria
d__Bacteria|p__Actinobacteria|c__Actinobacteria|o__Pseudonocardiales|f__Pseudonocardiaceae|g__Alloactinosynnema	83	103	69	76	91	76	85	54	69	72	79	86	d__Bacteria	p__Actinobacteria	c__Actinobacteria	o__Pseudonocardiales	f__Pseudonocardiaceae	g__Alloactinosynnema
d__Bacteria|p__Actinobacteria|c__Actinobacteria|o__Streptosporangiales|f__Nocardiopsaceae|g__Nocardiopsis	522	493	457	552	575	597	587	550	531	515	514	546	d__Bacteria	p__Actinobacteria	c__Actinobacteria	o__Streptosporangiales	f__Nocardiopsaceae	g__Nocardiopsis
d__Bacteria|p__Actinobacteria|c__Actinobacteria|o__Streptosporangiales|f__Nocardiopsaceae|g__Thermobifida	274	344	260	324	317	320	275	251	233	272	277	297	d__Bacteria	p__Actinobacteria	c__Actinobacteria	o__Streptosporangiales	f__Nocardiopsaceae	g__Thermobifida
d__Bacteria|p__Actinobacteria|c__Actinobacteria|o__Streptosporangiales|f__Streptosporangiaceae|g__Streptosporangium	417	412	354	389	401	290	299	244	286	288	314	349	d__Bacteria	p__Actinobacteria	c__Actinobacteria	o__Streptosporangiales	f__Streptosporangiaceae	g__Streptosporangium
d__Bacteria|p__Actinobacteria|c__Actinobacteria|o__Streptosporangiales|f__Streptosporangiaceae|g__Nonomuraea	302	310	282	292	267	328	268	282	234	295	219	291	d__Bacteria	p__Actinobacteria	c__Actinobacteria	o__Streptosporangiales	f__Streptosporangiaceae	g__Nonomuraea
d__Bacteria|p__Actinobacteria|c__Actinobacteria|o__Streptosporangiales|f__Thermomonosporaceae|g__Thermomonospora	317	287	285	412	423	330	407	281	292	385	359	554	d__Bacteria	p__Actinobacteria	c__Actinobacteria	o__Streptosporangiales	f__Thermomonosporaceae	g__Thermomonospora
d__Bacteria|p__Actinobacteria|c__Actinobacteria|o__Streptosporangiales|f__Thermomonosporaceae|g__Actinomadura	222	257	179	209	241	251	144	224	213	188	257	185	d__Bacteria	p__Actinobacteria	c__Actinobacteria	o__Streptosporangiales	f__Thermomonosporaceae	g__Actinomadura
d__Bacteria|p__Actinobacteria|c__Actinobacteria|o__Nakamurellales|f__Nakamurellaceae|g__Nakamurella	1994	1894	1867	1135	1482	1374	994	933	796	765	695	594	d__Bacteria	p__Actinobacteria	c__Actinobacteria	o__Nakamurellales	f__Nakamurellaceae	g__Nakamurella
d__Bacteria|p__Actinobacteria|c__Actinobacteria|o__Frankiales|f__Frankiaceae|g__Frankia	763	810	718	857	859	733	821	693	916	822	914	1065	d__Bacteria	p__Actinobacteria	c__Actinobacteria	o__Frankiales	f__Frankiaceae	g__Frankia
d__Bacteria|p__Actinobacteria|c__Actinobacteria|o__Frankiales|f__Frankiaceae|g__Jatrophihabitans	62	57	46	53	69	71	72	55	47	66	57	90	d__Bacteria	p__Actinobacteria	c__Actinobacteria	o__Frankiales	f__Frankiaceae	g__Jatrophihabitans
d__Bacteria|p__Actinobacteria|c__Actinobacteria|o__Kineosporiales|f__Kineosporiaceae|g__Kineococcus	519	624	506	461	542	653	815	586	509	677	447	767	d__Bacteria	p__Actinobacteria	c__Actinobacteria	o__Kineosporiales	f__Kineosporiaceae	g__Kineococcus
d__Bacteria|p__Actinobacteria|c__Actinobacteria|o__Candidatus Nanopelagicales|f__Candidatus Nanopelagicaceae|g__Candidatus Planktophila	288	320	259	411	412	369	444	415	384	544	571	660	d__Bacteria	p__Actinobacteria	c__Actinobacteria	o__Candidatus Nanopelagicales	f__Candidatus Nanopelagicaceae	g__Candidatus Planktophila
d__Bacteria|p__Actinobacteria|c__Actinobacteria|o__Candidatus Nanopelagicales|f__Candidatus Nanopelagicaceae|g__Candidatus Nanopelagicus	119	140	142	171	216	224	193	160	164	192	204	219	d__Bacteria	p__Actinobacteria	c__Actinobacteria	o__Candidatus Nanopelagicales	f__Candidatus Nanopelagicaceae	g__Candidatus Nanopelagicus
d__Bacteria|p__Actinobacteria|c__Actinobacteria|o__Geodermatophilales|f__Geodermatophilaceae|g__Geodermatophilus	150	187	142	164	149	88	96	85	114	114	119	92	d__Bacteria	p__Actinobacteria	c__Actinobacteria	o__Geodermatophilales	f__Geodermatophilaceae	g__Geodermatophilus
d__Bacteria|p__Actinobacteria|c__Actinobacteria|o__Geodermatophilales|f__Geodermatophilaceae|g__Blastococcus	138	171	173	216	226	173	151	152	155	183	129	196	d__Bacteria	p__Actinobacteria	c__Actinobacteria	o__Geodermatophilales	f__Geodermatophilaceae	g__Blastococcus
d__Bacteria|p__Actinobacteria|c__Actinobacteria|o__Geodermatophilales|f__Geodermatophilaceae|g__Modestobacter	108	142	108	108	127	124	117	120	136	116	114	136	d__Bacteria	p__Actinobacteria	c__Actinobacteria	o__Geodermatophilales	f__Geodermatophilaceae	g__Modestobacter
d__Bacteria|p__Actinobacteria|c__Actinobacteria|o__Jiangellales|f__Jiangellaceae|g__Jiangella	295	429	365	443	445	561	460	471	508	514	567	536	d__Bacteria	p__Actinobacteria	c__Actinobacteria	o__Jiangellales	f__Jiangellaceae	g__Jiangella
d__Bacteria|p__Actinobacteria|c__Actinobacteria|o__Catenulisporales|f__Catenulisporaceae|g__Catenulispora	204	236	171	220	209	167	163	143	147	165	166	198	d__Bacteria	p__Actinobacteria	c__Actinobacteria	o__Catenulisporales	f__Catenulisporaceae	g__Catenulispora
d__Bacteria|p__Actinobacteria|c__Actinobacteria|o__Glycomycetales|f__Glycomycetaceae|g__Stackebrandtia	163	229	180	181	249	193	208	203	171	214	157	236	d__Bacteria	p__Actinobacteria	c__Actinobacteria	o__Glycomycetales	f__Glycomycetaceae	g__Stackebrandtia
d__Bacteria|p__Actinobacteria|c__Actinobacteria|o__Acidothermales|f__Acidothermaceae|g__Acidothermus	150	257	189	183	189	232	239	201	164	201	189	256	d__Bacteria	p__Actinobacteria	c__Actinobacteria	o__Acidothermales	f__Acidothermaceae	g__Acidothermus
d__Bacteria|p__Actinobacteria|c__Actinobacteria|o__Actinopolysporales|f__Actinopolysporaceae|g__Actinopolyspora	139	157	133	155	129	123	74	85	91	85	72	88	d__Bacteria	p__Actinobacteria	c__Actinobacteria	o__Actinopolysporales	f__Actinopolysporaceae	g__Actinopolyspora
d__Bacteria|p__Actinobacteria|c__Nitriliruptoria|o__Euzebyales|f__Euzebyaceae|g__Euzebya	10726	23535	28502	32778	10113	19317	7269	2848	3783	3064	14598	17217	d__Bacteria	p__Actinobacteria	c__Nitriliruptoria	o__Euzebyales	f__Euzebyaceae	g__Euzebya
d__Bacteria|p__Actinobacteria|c__Rubrobacteria|o__Rubrobacterales|f__Rubrobacteraceae|g__Rubrobacter	473	491	420	492	548	426	401	402	364	436	425	502	d__Bacteria	p__Actinobacteria	c__Rubrobacteria	o__Rubrobacterales	f__Rubrobacteraceae	g__Rubrobacter
d__Bacteria|p__Actinobacteria|c__Acidimicrobiia|o__Acidimicrobiales|f__Acidimicrobiaceae|g__Acidimicrobium	351	736	640	869	455	524	135	147	228	143	376	336	d__Bacteria	p__Actinobacteria	c__Acidimicrobiia	o__Acidimicrobiales	f__Acidimicrobiaceae	g__Acidimicrobium
d__Bacteria|p__Actinobacteria|c__Thermoleophilia|o__Solirubrobacterales|f__Conexibacteraceae|g__Conexibacter	307	396	329	374	350	378	401	367	363	412	382	545	d__Bacteria	p__Actinobacteria	c__Thermoleophilia	o__Solirubrobacterales	f__Conexibacteraceae	g__Conexibacter
d__Bacteria|p__Chloroflexi|c__Anaerolineae|o__Anaerolineales|f__Anaerolineaceae|s__Anaerolineaceae bacterium oral taxon 439	25153	32858	31680	21229	28118	15493	14414	14844	17155	14797	9976	11146	d__Bacteria	p__Chloroflexi	c__Anaerolineae	o__Anaerolineales	f__Anaerolineaceae	s__Anaerolineaceae bacterium oral taxon 439
d__Bacteria|p__Chloroflexi|c__Anaerolineae|o__Anaerolineales|f__Anaerolineaceae|g__Anaerolinea	5793	7629	7189	4156	5516	3662	4183	3750	3736	4412	2527	2873	d__Bacteria	p__Chloroflexi	c__Anaerolineae	o__Anaerolineales	f__Anaerolineaceae	g__Anaerolinea
d__Bacteria|p__Chloroflexi|c__Anaerolineae|o__Anaerolineales|f__Anaerolineaceae|g__Brevefilum	127	167	146	123	203	171	122	157	128	161	202	175	d__Bacteria	p__Chloroflexi	c__Anaerolineae	o__Anaerolineales	f__Anaerolineaceae	g__Brevefilum
d__Bacteria|p__Chloroflexi|c__Dehalococcoidia|o__Dehalococcoidales|f__Dehalococcoidaceae|g__Dehalococcoides	268	332	351	293	326	454	372	321	291	315	300	381	d__Bacteria	p__Chloroflexi	c__Dehalococcoidia	o__Dehalococcoidales	f__Dehalococcoidaceae	g__Dehalococcoides
d__Bacteria|p__Chloroflexi|c__Chloroflexia|o__Chloroflexales|f__Roseiflexaceae|g__Roseiflexus	295	344	267	277	350	299	363	291	261	327	338	417	d__Bacteria	p__Chloroflexi	c__Chloroflexia	o__Chloroflexales	f__Roseiflexaceae	g__Roseiflexus
d__Bacteria|p__Chloroflexi|c__Chloroflexia|o__Chloroflexales|f__Chloroflexaceae|g__Chloroflexus	249	483	303	421	400	230	321	250	309	259	234	294	d__Bacteria	p__Chloroflexi	c__Chloroflexia	o__Chloroflexales	f__Chloroflexaceae	g__Chloroflexus
d__Bacteria|p__Chloroflexi|c__Thermomicrobia|o__Sphaerobacterales|f__Sphaerobacteraceae|g__Sphaerobacter	295	356	304	291	352	357	441	368	362	420	307	422	d__Bacteria	p__Chloroflexi	c__Thermomicrobia	o__Sphaerobacterales	f__Sphaerobacteraceae	g__Sphaerobacter
d__Bacteria|p__Chloroflexi|c__Thermomicrobia|o__Thermomicrobiales|f__Thermomicrobiaceae|g__Thermomicrobium	138	210	159	243	134	235	108	147	135	168	256	299	d__Bacteria	p__Chloroflexi	c__Thermomicrobia	o__Thermomicrobiales	f__Thermomicrobiaceae	g__Thermomicrobium
d__Bacteria|p__Chloroflexi|c__Ardenticatenia|o__Ardenticatenales|f__Ardenticatenaceae|g__Candidatus Promineofilum	406	520	441	454	485	423	328	330	349	353	365	371	d__Bacteria	p__Chloroflexi	c__Ardenticatenia	o__Ardenticatenales	f__Ardenticatenaceae	g__Candidatus Promineofilum
d__Bacteria|p__Chloroflexi|c__Caldilineae|o__Caldilineales|f__Caldilineaceae|g__Caldilinea	405	452	385	380	373	290	265	242	229	279	245	362	d__Bacteria	p__Chloroflexi	c__Caldilineae	o__Caldilineales	f__Caldilineaceae	g__Caldilinea
d__Bacteria|p__Cyanobacteria|o__Synechococcales|f__Synechococcaceae|g__Synechococcus|s__Synechococcus sp. JA-3-3Ab	443	530	354	807	658	171	530	489	336	597	539	827	d__Bacteria	p__Cyanobacteria	o__Synechococcales	f__Synechococcaceae	g__Synechococcus	s__Synechococcus sp. JA-3-3Ab
d__Bacteria|p__Cyanobacteria|o__Synechococcales|f__Synechococcaceae|g__Synechococcus|s__Synechococcus sp. PCC 7336	406	422	310	521	490	804	677	608	390	746	537	780	d__Bacteria	p__Cyanobacteria	o__Synechococcales	f__Synechococcaceae	g__Synechococcus	s__Synechococcus sp. PCC 7336
d__Bacteria|p__Cyanobacteria|o__Synechococcales|f__Synechococcaceae|g__Synechococcus|s__Synechococcus sp. WH 8109	193	175	132	170	196	166	325	181	157	188	139	180	d__Bacteria	p__Cyanobacteria	o__Synechococcales	f__Synechococcaceae	g__Synechococcus	s__Synechococcus sp. WH 8109
d__Bacteria|p__Cyanobacteria|o__Synechococcales|f__Synechococcaceae|g__Synechococcus|s__Synechococcus sp. JA-2-3B'a(2-13)	116	140	120	130	145	120	137	93	105	119	122	134	d__Bacteria	p__Cyanobacteria	o__Synechococcales	f__Synechococcaceae	g__Synechococcus	s__Synechococcus sp. JA-2-3B'a(2-13)
d__Bacteria|p__Cyanobacteria|o__Synechococcales|f__Synechococcaceae|g__Synechococcus|s__Synechococcus sp. KORDI-100	112	138	93	98	110	116	154	120	101	113	126	158	d__Bacteria	p__Cyanobacteria	o__Synechococcales	f__Synechococcaceae	g__Synechococcus	s__Synechococcus sp. KORDI-100
d__Bacteria|p__Cyanobacteria|o__Synechococcales|f__Synechococcaceae|g__Synechococcus|s__Synechococcus sp. CC9902	103	70	64	69	63	37	33	27	29	23	20	34	d__Bacteria	p__Cyanobacteria	o__Synechococcales	f__Synechococcaceae	g__Synechococcus	s__Synechococcus sp. CC9902
d__Bacteria|p__Cyanobacteria|o__Synechococcales|f__Synechococcaceae|g__Synechococcus|s__Synechococcus sp. SynAce01	95	116	82	101	80	82	80	95	79	91	71	88	d__Bacteria	p__Cyanobacteria	o__Synechococcales	f__Synechococcaceae	g__Synechococcus	s__Synechococcus sp. SynAce01
d__Bacteria|p__Cyanobacteria|o__Synechococcales|f__Synechococcaceae|g__Synechococcus|s__Synechococcus sp. RCC307	93	133	75	154	145	165	222	193	165	191	182	186	d__Bacteria	p__Cyanobacteria	o__Synechococcales	f__Synechococcaceae	g__Synechococcus	s__Synechococcus sp. RCC307
d__Bacteria|p__Cyanobacteria|o__Synechococcales|f__Synechococcaceae|g__Synechococcus|s__Synechococcus sp. CC9605	91	114	95	103	128	112	221	140	89	130	99	139	d__Bacteria	p__Cyanobacteria	o__Synechococcales	f__Synechococcaceae	g__Synechococcus	s__Synechococcus sp. CC9605
d__Bacteria|p__Cyanobacteria|o__Synechococcales|f__Synechococcaceae|g__Synechococcus|s__Synechococcus sp. WH 7803	63	56	38	75	43	47	65	61	37	62	47	65	d__Bacteria	p__Cyanobacteria	o__Synechococcales	f__Synechococcaceae	g__Synechococcus	s__Synechococcus sp. WH 7803
d__Bacteria|p__Cyanobacteria|o__Synechococcales|f__Synechococcaceae|g__Synechococcus|s__Synechococcus sp. KORDI-52	53	55	35	35	28	21	43	21	41	27	28	22	d__Bacteria	p__Cyanobacteria	o__Synechococcales	f__Synechococcaceae	g__Synechococcus	s__Synechococcus sp. KORDI-52
d__Bacteria|p__Cyanobacteria|o__Synechococcales|f__Synechococcaceae|g__Synechococcus|s__Synechococcus sp. KORDI-49	50	49	37	40	56	44	64	44	48	39	31	47	d__Bacteria	p__Cyanobacteria	o__Synechococcales	f__Synechococcaceae	g__Synechococcus	s__Synechococcus sp. KORDI-49
d__Bacteria|p__Cyanobacteria|o__Synechococcales|f__Synechococcaceae|g__Synechococcus|s__Synechococcus sp. NIES-970	45	40	28	32	35	23	35	18	15	23	32	43	d__Bacteria	p__Cyanobacteria	o__Synechococcales	f__Synechococcaceae	g__Synechococcus	s__Synechococcus sp. NIES-970
d__Bacteria|p__Cyanobacteria|o__Synechococcales|f__Synechococcaceae|g__Synechococcus|s__Synechococcus sp. PCC 7117	43	38	22	41	31	33	47	26	29	35	27	43	d__Bacteria	p__Cyanobacteria	o__Synechococcales	f__Synechococcaceae	g__Synechococcus	s__Synechococcus sp. PCC 7117
d__Bacteria|p__Cyanobacteria|o__Synechococcales|f__Synechococcaceae|g__Synechococcus|s__Synechococcus sp. PCC 7502	38	35	33	37	23	17	21	29	33	32	98	28	d__Bacteria	p__Cyanobacteria	o__Synechococcales	f__Synechococcaceae	g__Synechococcus	s__Synechococcus sp. PCC 7502
d__Bacteria|p__Cyanobacteria|o__Synechococcales|f__Synechococcaceae|g__Synechococcus|s__Synechococcus sp. CC9311	34	72	41	61	63	50	43	48	36	56	64	82	d__Bacteria	p__Cyanobacteria	o__Synechococcales	f__Synechococcaceae	g__Synechococcus	s__Synechococcus sp. CC9311
d__Bacteria|p__Cyanobacteria|o__Synechococcales|f__Synechococcaceae|g__Synechococcus|s__Synechococcus sp. PCC 7003	32	26	26	50	35	22	29	23	16	30	18	15	d__Bacteria	p__Cyanobacteria	o__Synechococcales	f__Synechococcaceae	g__Synechococcus	s__Synechococcus sp. PCC 7003
d__Bacteria|p__Cyanobacteria|o__Synechococcales|f__Synechococcaceae|g__Synechococcus|s__Synechococcus sp. PCC 73109	31	56	52	65	70	26	10	34	43	17	23	18	d__Bacteria	p__Cyanobacteria	o__Synechococcales	f__Synechococcaceae	g__Synechococcus	s__Synechococcus sp. PCC 73109
d__Bacteria|p__Cyanobacteria|o__Synechococcales|f__Synechococcaceae|g__Synechococcus|s__Synechococcus sp. WH 8102	30	21	20	28	28	22	19	22	18	14	16	19	d__Bacteria	p__Cyanobacteria	o__Synechococcales	f__Synechococcaceae	g__Synechococcus	s__Synechococcus sp. WH 8102
d__Bacteria|p__Cyanobacteria|o__Synechococcales|f__Synechococcaceae|g__Synechococcus|s__Synechococcus lividus	21	32	31	28	30	23	19	22	24	33	22	24	d__Bacteria	p__Cyanobacteria	o__Synechococcales	f__Synechococcaceae	g__Synechococcus	s__Synechococcus lividus
d__Bacteria|p__Cyanobacteria|o__Synechococcales|f__Synechococcaceae|g__Synechococcus|s__Synechococcus sp. PCC 6312	19	15	11	19	18	32	49	30	19	42	20	32	d__Bacteria	p__Cyanobacteria	o__Synechococcales	f__Synechococcaceae	g__Synechococcus	s__Synechococcus sp. PCC 6312
d__Bacteria|p__Cyanobacteria|o__Synechococcales|f__Synechococcaceae|g__Synechococcus|s__Synechococcus sp. WH 8020	11	12	10	7	13	9	16	5	9	3	8	8	d__Bacteria	p__Cyanobacteria	o__Synechococcales	f__Synechococcaceae	g__Synechococcus	s__Synechococcus sp. WH 8020
d__Bacteria|p__Cyanobacteria|o__Synechococcales|f__Synechococcaceae|g__Synechococcus|s__Synechococcus sp. PCC 8807	9	8	2	11	3	7	2	5	3	8	4	9	d__Bacteria	p__Cyanobacteria	o__Synechococcales	f__Synechococcaceae	g__Synechococcus	s__Synechococcus sp. PCC 8807
d__Bacteria|p__Cyanobacteria|o__Synechococcales|f__Synechococcaceae|g__Synechococcus|s__Synechococcus sp. PCC 7002	5	2	2	2	7	2	1	3	4	2	1	2	d__Bacteria	p__Cyanobacteria	o__Synechococcales	f__Synechococcaceae	g__Synechococcus	s__Synechococcus sp. PCC 7002
d__Bacteria|p__Cyanobacteria|o__Synechococcales|f__Synechococcaceae|g__Synechococcus|s__Synechococcus sp. WH 8103	4	11	3	7	7	11	5	8	3	10	2	3	d__Bacteria	p__Cyanobacteria	o__Synechococcales	f__Synechococcaceae	g__Synechococcus	s__Synechococcus sp. WH 8103
d__Bacteria|p__Cyanobacteria|o__Synechococcales|f__Synechococcaceae|g__Synechococcus|s__Synechococcus sp. UTEX 2973	1	0	0	0	1	0	1	0	0	1	0	3	d__Bacteria	p__Cyanobacteria	o__Synechococcales	f__Synechococcaceae	g__Synechococcus	s__Synechococcus sp. UTEX 2973
d__Bacteria|p__Cyanobacteria|o__Synechococcales|f__Synechococcaceae|g__Cyanobium|s__Cyanobium sp. NIES-981	1121	1652	1055	1199	1133	999	1346	895	1039	1016	950	1325	d__Bacteria	p__Cyanobacteria	o__Synechococcales	f__Synechococcaceae	g__Cyanobium	s__Cyanobium sp. NIES-981
d__Bacteria|p__Cyanobacteria|o__Synechococcales|f__Synechococcaceae|g__Cyanobium|s__Cyanobium gracile	164	169	141	123	147	145	146	120	119	109	108	127	d__Bacteria	p__Cyanobacteria	o__Synechococcales	f__Synechococcaceae	g__Cyanobium	s__Cyanobium gracile
d__Bacteria|p__Cyanobacteria|o__Synechococcales|f__Synechococcaceae|g__Thermosynechococcus|s__Thermosynechococcus sp. NK55a	25	22	12	10	20	20	12	14	15	11	15	17	d__Bacteria	p__Cyanobacteria	o__Synechococcales	f__Synechococcaceae	g__Thermosynechococcus	s__Thermosynechococcus sp. NK55a
d__Bacteria|p__Cyanobacteria|o__Synechococcales|f__Synechococcaceae|g__Thermosynechococcus|s__Thermosynechococcus elongatus	22	28	21	34	31	24	17	13	18	19	22	25	d__Bacteria	p__Cyanobacteria	o__Synechococcales	f__Synechococcaceae	g__Thermosynechococcus	s__Thermosynechococcus elongatus
d__Bacteria|p__Cyanobacteria|o__Synechococcales|f__Synechococcaceae|g__Dactylococcopsis|s__Dactylococcopsis salina	51	66	59	87	66	167	152	94	107	86	139	129	d__Bacteria	p__Cyanobacteria	o__Synechococcales	f__Synechococcaceae	g__Dactylococcopsis	s__Dactylococcopsis salina
d__Bacteria|p__Cyanobacteria|o__Synechococcales|f__Leptolyngbyaceae|g__Leptolyngbya|s__Leptolyngbya sp. PCC 7376	163	155	119	146	135	140	130	112	95	135	122	143	d__Bacteria	p__Cyanobacteria	o__Synechococcales	f__Leptolyngbyaceae	g__Leptolyngbya	s__Leptolyngbya sp. PCC 7376
d__Bacteria|p__Cyanobacteria|o__Synechococcales|f__Leptolyngbyaceae|g__Leptolyngbya|s__Leptolyngbya sp. O-77	158	256	225	218	233	548	408	250	200	308	308	279	d__Bacteria	p__Cyanobacteria	o__Synechococcales	f__Leptolyngbyaceae	g__Leptolyngbya	s__Leptolyngbya sp. O-77
d__Bacteria|p__Cyanobacteria|o__Synechococcales|f__Leptolyngbyaceae|g__Leptolyngbya|s__Leptolyngbya sp. NIES-3755	63	54	57	91	66	65	64	60	69	126	69	54	d__Bacteria	p__Cyanobacteria	o__Synechococcales	f__Leptolyngbyaceae	g__Leptolyngbya	s__Leptolyngbya sp. NIES-3755
d__Bacteria|p__Cyanobacteria|o__Synechococcales|f__Leptolyngbyaceae|g__Leptolyngbya|s__Leptolyngbya boryana	55	45	46	47	43	57	42	40	34	67	61	49	d__Bacteria	p__Cyanobacteria	o__Synechococcales	f__Leptolyngbyaceae	g__Leptolyngbya	s__Leptolyngbya boryana
d__Bacteria|p__Cyanobacteria|o__Synechococcales|f__Prochloraceae|g__Prochlorococcus|s__Prochlorococcus marinus	275	367	297	360	409	479	590	422	373	392	421	446	d__Bacteria	p__Cyanobacteria	o__Synechococcales	f__Prochloraceae	g__Prochlorococcus	s__Prochlorococcus marinus
d__Bacteria|p__Cyanobacteria|o__Synechococcales|f__Prochloraceae|g__Prochlorococcus|s__Prochlorococcus sp. MIT 0801	14	20	7	9	17	14	21	14	15	14	11	8	d__Bacteria	p__Cyanobacteria	o__Synechococcales	f__Prochloraceae	g__Prochlorococcus	s__Prochlorococcus sp. MIT 0801
d__Bacteria|p__Cyanobacteria|o__Synechococcales|f__Prochloraceae|g__Prochlorococcus|s__Prochlorococcus sp. MIT 0604	10	8	7	12	11	33	36	39	21	36	30	35	d__Bacteria	p__Cyanobacteria	o__Synechococcales	f__Prochloraceae	g__Prochlorococcus	s__Prochlorococcus sp. MIT 0604
d__Bacteria|p__Cyanobacteria|o__Synechococcales|f__Prochlorotrichaceae|g__Halomicronema|s__Halomicronema hongdechloris	364	556	573	339	669	410	569	441	388	422	250	350	d__Bacteria	p__Cyanobacteria	o__Synechococcales	f__Prochlorotrichaceae	g__Halomicronema	s__Halomicronema hongdechloris
d__Bacteria|p__Cyanobacteria|o__Synechococcales|f__Merismopediaceae|g__Synechocystis|s__Synechocystis sp. PCC 6714	70	57	52	55	57	46	30	46	48	47	38	56	d__Bacteria	p__Cyanobacteria	o__Synechococcales	f__Merismopediaceae	g__Synechocystis	s__Synechocystis sp. PCC 6714
d__Bacteria|p__Cyanobacteria|o__Synechococcales|f__Acaryochloridaceae|g__Acaryochloris|s__Acaryochloris marina	64	61	67	61	81	50	77	53	61	63	57	62	d__Bacteria	p__Cyanobacteria	o__Synechococcales	f__Acaryochloridaceae	g__Acaryochloris	s__Acaryochloris marina
d__Bacteria|p__Cyanobacteria|o__Synechococcales|f__Chamaesiphonaceae|g__Chamaesiphon|s__Chamaesiphon minutus	43	50	50	71	83	90	123	110	75	140	110	134	d__Bacteria	p__Cyanobacteria	o__Synechococcales	f__Chamaesiphonaceae	g__Chamaesiphon	s__Chamaesiphon minutus
d__Bacteria|p__Cyanobacteria|o__Synechococcales|f__Pseudanabaenaceae|g__Pseudanabaena|s__Pseudanabaena sp. PCC 7367	22	33	14	24	21	51	40	45	24	59	24	48	d__Bacteria	p__Cyanobacteria	o__Synechococcales	f__Pseudanabaenaceae	g__Pseudanabaena	s__Pseudanabaena sp. PCC 7367
d__Bacteria|p__Cyanobacteria|o__Oscillatoriales|f__Oscillatoriaceae|g__Oscillatoria|s__Oscillatoria acuminata	522	605	389	737	812	185	731	757	518	877	482	577	d__Bacteria	p__Cyanobacteria	o__Oscillatoriales	f__Oscillatoriaceae	g__Oscillatoria	s__Oscillatoria acuminata
d__Bacteria|p__Cyanobacteria|o__Oscillatoriales|f__Oscillatoriaceae|g__Oscillatoria|s__Oscillatoria nigro-viridis	426	326	316	355	477	436	574	470	368	410	436	281	d__Bacteria	p__Cyanobacteria	o__Oscillatoriales	f__Oscillatoriaceae	g__Oscillatoria	s__Oscillatoria nigro-viridis
d__Bacteria|p__Cyanobacteria|o__Oscillatoriales|f__Oscillatoriaceae|g__Moorea|s__Moorea producens	156	203	165	163	202	274	330	291	191	238	230	243	d__Bacteria	p__Cyanobacteria	o__Oscillatoriales	f__Oscillatoriaceae	g__Moorea	s__Moorea producens
d__Bacteria|p__Cyanobacteria|o__Oscillatoriales|f__Microcoleaceae|g__Arthrospira|s__Arthrospira platensis	242	213	259	325	375	215	266	274	145	272	388	397	d__Bacteria	p__Cyanobacteria	o__Oscillatoriales	f__Microcoleaceae	g__Arthrospira	s__Arthrospira platensis
d__Bacteria|p__Cyanobacteria|o__Oscillatoriales|f__Microcoleaceae|g__Arthrospira|s__Arthrospira sp. PCC 8005	4	5	2	5	6	1	2	1	4	2	2	4	d__Bacteria	p__Cyanobacteria	o__Oscillatoriales	f__Microcoleaceae	g__Arthrospira	s__Arthrospira sp. PCC 8005
d__Bacteria|p__Cyanobacteria|o__Oscillatoriales|f__Microcoleaceae|g__Arthrospira|s__Arthrospira sp. TJSD092	1	3	0	0	1	1	0	1	1	0	1	0	d__Bacteria	p__Cyanobacteria	o__Oscillatoriales	f__Microcoleaceae	g__Arthrospira	s__Arthrospira sp. TJSD092
d__Bacteria|p__Cyanobacteria|o__Oscillatoriales|f__Microcoleaceae|g__Trichodesmium|s__Trichodesmium erythraeum	93	65	59	73	88	96	154	73	81	114	88	144	d__Bacteria	p__Cyanobacteria	o__Oscillatoriales	f__Microcoleaceae	g__Trichodesmium	s__Trichodesmium erythraeum
d__Bacteria|p__Cyanobacteria|o__Oscillatoriales|f__Microcoleaceae|g__Planktothrix|s__Planktothrix agardhii	48	49	38	33	54	73	76	62	56	62	54	105	d__Bacteria	p__Cyanobacteria	o__Oscillatoriales	f__Microcoleaceae	g__Planktothrix	s__Planktothrix agardhii
d__Bacteria|p__Cyanobacteria|o__Oscillatoriales|f__Microcoleaceae|g__Microcoleus|s__Microcoleus sp. PCC 7113	36	53	43	79	89	75	46	42	49	48	119	93	d__Bacteria	p__Cyanobacteria	o__Oscillatoriales	f__Microcoleaceae	g__Microcoleus	s__Microcoleus sp. PCC 7113
d__Bacteria|p__Cyanobacteria|o__Oscillatoriales|f__Cyanothecaceae|g__Cyanothece|s__Cyanothece sp. PCC 7424	168	155	140	146	178	164	151	171	130	166	140	159	d__Bacteria	p__Cyanobacteria	o__Oscillatoriales	f__Cyanothecaceae	g__Cyanothece	s__Cyanothece sp. PCC 7424
d__Bacteria|p__Cyanobacteria|o__Oscillatoriales|f__Cyanothecaceae|g__Cyanothece|s__Cyanothece sp. PCC 7425	82	96	144	75	73	170	107	51	75	104	83	121	d__Bacteria	p__Cyanobacteria	o__Oscillatoriales	f__Cyanothecaceae	g__Cyanothece	s__Cyanothece sp. PCC 7425
d__Bacteria|p__Cyanobacteria|o__Oscillatoriales|f__Cyanothecaceae|g__Cyanothece|s__Cyanothece sp. PCC 7822	36	32	25	48	39	23	47	38	31	45	44	24	d__Bacteria	p__Cyanobacteria	o__Oscillatoriales	f__Cyanothecaceae	g__Cyanothece	s__Cyanothece sp. PCC 7822
d__Bacteria|p__Cyanobacteria|o__Oscillatoriales|f__Cyanothecaceae|g__Cyanothece|s__Cyanothece sp. ATCC 51142	33	25	37	35	37	44	39	31	37	38	51	31	d__Bacteria	p__Cyanobacteria	o__Oscillatoriales	f__Cyanothecaceae	g__Cyanothece	s__Cyanothece sp. ATCC 51142
d__Bacteria|p__Cyanobacteria|o__Oscillatoriales|f__Cyanothecaceae|g__Cyanothece|s__Cyanothece sp. PCC 8802	17	8	13	17	14	6	24	12	14	18	11	33	d__Bacteria	p__Cyanobacteria	o__Oscillatoriales	f__Cyanothecaceae	g__Cyanothece	s__Cyanothece sp. PCC 8802
d__Bacteria|p__Cyanobacteria|o__Oscillatoriales|f__Cyanothecaceae|g__Cyanothece|s__Cyanothece sp. PCC 8801	4	5	2	5	8	2	8	4	2	6	6	7	d__Bacteria	p__Cyanobacteria	o__Oscillatoriales	f__Cyanothecaceae	g__Cyanothece	s__Cyanothece sp. PCC 8801
d__Bacteria|p__Cyanobacteria|o__Oscillatoriales|f__Gomontiellaceae|g__Crinalium|s__Crinalium epipsammum	197	170	159	155	174	172	71	138	194	151	232	103	d__Bacteria	p__Cyanobacteria	o__Oscillatoriales	f__Gomontiellaceae	g__Crinalium	s__Crinalium epipsammum
d__Bacteria|p__Cyanobacteria|o__Oscillatoriales|f__Coleofasciculaceae|g__Geitlerinema|s__Geitlerinema sp. PCC 7407	130	152	138	133	140	149	163	128	115	129	131	188	d__Bacteria	p__Cyanobacteria	o__Oscillatoriales	f__Coleofasciculaceae	g__Geitlerinema	s__Geitlerinema sp. PCC 7407
d__Bacteria|p__Cyanobacteria|o__Chroococcales|f__Aphanothecaceae|g__Halothece|s__Halothece sp. PCC 7418	1149	1295	818	1847	1606	315	1454	1663	1290	1752	1287	1386	d__Bacteria	p__Cyanobacteria	o__Chroococcales	f__Aphanothecaceae	g__Halothece	s__Halothece sp. PCC 7418
d__Bacteria|p__Cyanobacteria|o__Chroococcales|f__Aphanothecaceae|g__Candidatus Atelocyanobacterium|s__Candidatus Atelocyanobacterium thalassa	22	27	22	24	26	45	49	29	30	36	31	49	d__Bacteria	p__Cyanobacteria	o__Chroococcales	f__Aphanothecaceae	g__Candidatus Atelocyanobacterium	s__Candidatus Atelocyanobacterium thalassa
d__Bacteria|p__Cyanobacteria|o__Chroococcales|f__Chroococcaceae|g__Geminocystis|s__Geminocystis herdmanii	115	143	117	114	176	181	215	167	198	228	208	201	d__Bacteria	p__Cyanobacteria	o__Chroococcales	f__Chroococcaceae	g__Geminocystis	s__Geminocystis herdmanii
d__Bacteria|p__Cyanobacteria|o__Chroococcales|f__Chroococcaceae|g__Geminocystis|s__Geminocystis sp. NIES-3709	74	101	97	92	119	121	147	96	89	98	95	79	d__Bacteria	p__Cyanobacteria	o__Chroococcales	f__Chroococcaceae	g__Geminocystis	s__Geminocystis sp. NIES-3709
d__Bacteria|p__Cyanobacteria|o__Chroococcales|f__Chroococcaceae|g__Geminocystis|s__Geminocystis sp. NIES-3708	53	61	62	74	77	62	76	66	55	62	59	65	d__Bacteria	p__Cyanobacteria	o__Chroococcales	f__Chroococcaceae	g__Geminocystis	s__Geminocystis sp. NIES-3708
d__Bacteria|p__Cyanobacteria|o__Chroococcales|f__Chroococcaceae|g__Gloeocapsa|s__Gloeocapsa sp. PCC 7428	64	76	64	82	42	32	54	63	57	81	213	64	d__Bacteria	p__Cyanobacteria	o__Chroococcales	f__Chroococcaceae	g__Gloeocapsa	s__Gloeocapsa sp. PCC 7428
d__Bacteria|p__Cyanobacteria|o__Chroococcales|f__Chroococcaceae|g__Chondrocystis|s__Chondrocystis sp. NIES-4102	43	56	42	54	68	53	49	41	41	84	60	70	d__Bacteria	p__Cyanobacteria	o__Chroococcales	f__Chroococcaceae	g__Chondrocystis	s__Chondrocystis sp. NIES-4102
d__Bacteria|p__Cyanobacteria|o__Chroococcales|f__Microcystaceae|g__Microcystis|s__Microcystis aeruginosa	48	60	62	59	77	64	67	61	64	49	48	53	d__Bacteria	p__Cyanobacteria	o__Chroococcales	f__Microcystaceae	g__Microcystis	s__Microcystis aeruginosa
d__Bacteria|p__Cyanobacteria|o__Chroococcales|f__Microcystaceae|g__Microcystis|s__Microcystis sp. MC19	18	25	26	44	27	25	27	23	27	28	31	22	d__Bacteria	p__Cyanobacteria	o__Chroococcales	f__Microcystaceae	g__Microcystis	s__Microcystis sp. MC19
d__Bacteria|p__Cyanobacteria|o__Chroococcales|f__Cyanobacteriaceae|g__Cyanobacterium|s__Cyanobacterium aponinum	47	61	45	58	76	74	133	89	77	124	101	106	d__Bacteria	p__Cyanobacteria	o__Chroococcales	f__Cyanobacteriaceae	g__Cyanobacterium	s__Cyanobacterium aponinum
d__Bacteria|p__Cyanobacteria|o__Nostocales|f__Nostocaceae|g__Nostoc|s__Nostoc sp. 'Peltigera membranacea cyanobiont' N6	166	261	258	345	327	380	462	444	302	494	317	459	d__Bacteria	p__Cyanobacteria	o__Nostocales	f__Nostocaceae	g__Nostoc	s__Nostoc sp. 'Peltigera membranacea cyanobiont' N6
d__Bacteria|p__Cyanobacteria|o__Nostocales|f__Nostocaceae|g__Nostoc|s__Nostoc linckia	132	60	69	55	88	91	99	78	69	114	82	103	d__Bacteria	p__Cyanobacteria	o__Nostocales	f__Nostocaceae	g__Nostoc	s__Nostoc linckia
d__Bacteria|p__Cyanobacteria|o__Nostocales|f__Nostocaceae|g__Nostoc|s__Nostoc sp. PCC 7524	84	48	37	56	72	40	44	31	37	37	33	44	d__Bacteria	p__Cyanobacteria	o__Nostocales	f__Nostocaceae	g__Nostoc	s__Nostoc sp. PCC 7524
d__Bacteria|p__Cyanobacteria|o__Nostocales|f__Nostocaceae|g__Nostoc|s__Nostoc punctiforme	73	74	58	73	105	45	43	46	51	48	65	62	d__Bacteria	p__Cyanobacteria	o__Nostocales	f__Nostocaceae	g__Nostoc	s__Nostoc punctiforme
d__Bacteria|p__Cyanobacteria|o__Nostocales|f__Nostocaceae|g__Nostoc|s__Nostoc sp. NIES-4103	68	85	88	94	109	72	107	83	93	87	98	149	d__Bacteria	p__Cyanobacteria	o__Nostocales	f__Nostocaceae	g__Nostoc	s__Nostoc sp. NIES-4103
d__Bacteria|p__Cyanobacteria|o__Nostocales|f__Nostocaceae|g__Nostoc|s__Nostoc piscinale	61	44	48	43	78	75	65	64	56	90	50	93	d__Bacteria	p__Cyanobacteria	o__Nostocales	f__Nostocaceae	g__Nostoc	s__Nostoc piscinale
d__Bacteria|p__Cyanobacteria|o__Nostocales|f__Nostocaceae|g__Nostoc|s__Nostoc sp. CENA543	38	57	43	49	52	84	72	54	71	70	79	77	d__Bacteria	p__Cyanobacteria	o__Nostocales	f__Nostocaceae	g__Nostoc	s__Nostoc sp. CENA543
d__Bacteria|p__Cyanobacteria|o__Nostocales|f__Nostocaceae|g__Nostoc|s__Nostoc carneum	37	41	63	58	73	133	198	167	98	192	161	114	d__Bacteria	p__Cyanobacteria	o__Nostocales	f__Nostocaceae	g__Nostoc	s__Nostoc carneum
d__Bacteria|p__Cyanobacteria|o__Nostocales|f__Nostocaceae|g__Nostoc|s__Nostoc sphaeroides	37	61	28	46	27	35	37	29	37	40	46	48	d__Bacteria	p__Cyanobacteria	o__Nostocales	f__Nostocaceae	g__Nostoc	s__Nostoc sphaeroides
d__Bacteria|p__Cyanobacteria|o__Nostocales|f__Nostocaceae|g__Nostoc|s__Nostoc sp. 'Lobaria pulmonaria (5183) cyanobiont'	35	56	60	53	66	64	43	47	49	42	47	40	d__Bacteria	p__Cyanobacteria	o__Nostocales	f__Nostocaceae	g__Nostoc	s__Nostoc sp. 'Lobaria pulmonaria (5183) cyanobiont'
d__Bacteria|p__Cyanobacteria|o__Nostocales|f__Nostocaceae|g__Nostoc|s__Nostoc sp. PCC 7107	25	22	33	32	28	35	64	33	28	60	40	60	d__Bacteria	p__Cyanobacteria	o__Nostocales	f__Nostocaceae	g__Nostoc	s__Nostoc sp. PCC 7107
d__Bacteria|p__Cyanobacteria|o__Nostocales|f__Nostocaceae|g__Nostoc|s__Nostoc sp. NIES-2111	24	16	16	22	17	43	65	53	34	64	43	69	d__Bacteria	p__Cyanobacteria	o__Nostocales	f__Nostocaceae	g__Nostoc	s__Nostoc sp. NIES-2111
d__Bacteria|p__Cyanobacteria|o__Nostocales|f__Nostocaceae|g__Nostoc|s__Nostoc flagelliforme	20	22	27	42	37	26	52	40	23	43	29	24	d__Bacteria	p__Cyanobacteria	o__Nostocales	f__Nostocaceae	g__Nostoc	s__Nostoc flagelliforme
d__Bacteria|p__Cyanobacteria|o__Nostocales|f__Nostocaceae|g__Nostoc|s__Nostoc sp. NIES-3756	9	11	6	5	8	10	13	8	8	9	4	14	d__Bacteria	p__Cyanobacteria	o__Nostocales	f__Nostocaceae	g__Nostoc	s__Nostoc sp. NIES-3756
d__Bacteria|p__Cyanobacteria|o__Nostocales|f__Nostocaceae|g__Anabaena|s__Anabaena cylindrica	66	90	64	80	92	73	131	76	93	92	114	111	d__Bacteria	p__Cyanobacteria	o__Nostocales	f__Nostocaceae	g__Anabaena	s__Anabaena cylindrica
d__Bacteria|p__Cyanobacteria|o__Nostocales|f__Nostocaceae|g__Anabaena|s__Anabaena sp. 90	40	23	43	47	52	46	63	54	46	83	62	69	d__Bacteria	p__Cyanobacteria	o__Nostocales	f__Nostocaceae	g__Anabaena	s__Anabaena sp. 90
d__Bacteria|p__Cyanobacteria|o__Nostocales|f__Nostocaceae|g__Anabaena|s__Anabaena sp. WA102	38	53	36	49	55	61	47	48	41	36	41	29	d__Bacteria	p__Cyanobacteria	o__Nostocales	f__Nostocaceae	g__Anabaena	s__Anabaena sp. WA102
d__Bacteria|p__Cyanobacteria|o__Nostocales|f__Nostocaceae|g__Trichormus|s__Trichormus azollae	63	64	62	70	97	63	76	96	78	95	96	99	d__Bacteria	p__Cyanobacteria	o__Nostocales	f__Nostocaceae	g__Trichormus	s__Trichormus azollae
d__Bacteria|p__Cyanobacteria|o__Nostocales|f__Nostocaceae|g__Trichormus|s__Trichormus variabilis	31	51	33	33	81	45	77	57	55	73	56	51	d__Bacteria	p__Cyanobacteria	o__Nostocales	f__Nostocaceae	g__Trichormus	s__Trichormus variabilis
d__Bacteria|p__Cyanobacteria|o__Nostocales|f__Nostocaceae|g__Cylindrospermum|s__Cylindrospermum stagnale	44	48	46	93	59	70	92	75	80	77	89	92	d__Bacteria	p__Cyanobacteria	o__Nostocales	f__Nostocaceae	g__Cylindrospermum	s__Cylindrospermum stagnale
d__Bacteria|p__Cyanobacteria|o__Nostocales|f__Rivulariaceae|g__Calothrix|s__Calothrix sp. 336/3	396	574	460	892	1021	819	1304	1161	1126	1349	1250	1082	d__Bacteria	p__Cyanobacteria	o__Nostocales	f__Rivulariaceae	g__Calothrix	s__Calothrix sp. 336/3
d__Bacteria|p__Cyanobacteria|o__Nostocales|f__Rivulariaceae|g__Calothrix|s__Calothrix parasitica	132	140	142	158	154	150	180	110	150	115	130	134	d__Bacteria	p__Cyanobacteria	o__Nostocales	f__Rivulariaceae	g__Calothrix	s__Calothrix parasitica
d__Bacteria|p__Cyanobacteria|o__Nostocales|f__Rivulariaceae|g__Calothrix|s__Calothrix brevissima	88	96	90	97	110	93	92	77	81	101	83	106	d__Bacteria	p__Cyanobacteria	o__Nostocales	f__Rivulariaceae	g__Calothrix	s__Calothrix brevissima
d__Bacteria|p__Cyanobacteria|o__Nostocales|f__Rivulariaceae|g__Calothrix|s__Calothrix sp. NIES-2100	77	59	48	69	58	57	52	54	52	52	73	42	d__Bacteria	p__Cyanobacteria	o__Nostocales	f__Rivulariaceae	g__Calothrix	s__Calothrix sp. NIES-2100
d__Bacteria|p__Cyanobacteria|o__Nostocales|f__Rivulariaceae|g__Calothrix|s__Calothrix sp. NIES-4101	72	95	69	91	82	151	241	187	108	201	136	160	d__Bacteria	p__Cyanobacteria	o__Nostocales	f__Rivulariaceae	g__Calothrix	s__Calothrix sp. NIES-4101
d__Bacteria|p__Cyanobacteria|o__Nostocales|f__Rivulariaceae|g__Calothrix|s__Calothrix sp. NIES-2098	65	70	63	80	86	65	51	48	58	79	60	63	d__Bacteria	p__Cyanobacteria	o__Nostocales	f__Rivulariaceae	g__Calothrix	s__Calothrix sp. NIES-2098
d__Bacteria|p__Cyanobacteria|o__Nostocales|f__Rivulariaceae|g__Calothrix|s__Calothrix parietina	55	74	51	68	78	60	62	64	66	83	73	101	d__Bacteria	p__Cyanobacteria	o__Nostocales	f__Rivulariaceae	g__Calothrix	s__Calothrix parietina
d__Bacteria|p__Cyanobacteria|o__Nostocales|f__Rivulariaceae|g__Calothrix|s__Calothrix sp. PCC 7507	51	54	54	72	75	83	82	75	65	84	106	83	d__Bacteria	p__Cyanobacteria	o__Nostocales	f__Rivulariaceae	g__Calothrix	s__Calothrix sp. PCC 7507
d__Bacteria|p__Cyanobacteria|o__Nostocales|f__Rivulariaceae|g__Calothrix|s__Calothrix sp. NIES-3974	40	25	36	43	36	41	50	49	44	51	51	31	d__Bacteria	p__Cyanobacteria	o__Nostocales	f__Rivulariaceae	g__Calothrix	s__Calothrix sp. NIES-3974
d__Bacteria|p__Cyanobacteria|o__Nostocales|f__Rivulariaceae|g__Rivularia|s__Rivularia sp. PCC 7116	142	162	148	192	240	140	447	207	169	283	136	161	d__Bacteria	p__Cyanobacteria	o__Nostocales	f__Rivulariaceae	g__Rivularia	s__Rivularia sp. PCC 7116
d__Bacteria|p__Cyanobacteria|o__Nostocales|f__Rivulariaceae|g__Microchaete|s__Microchaete diplosiphon	36	29	20	32	34	21	25	25	33	35	41	39	d__Bacteria	p__Cyanobacteria	o__Nostocales	f__Rivulariaceae	g__Microchaete	s__Microchaete diplosiphon
d__Bacteria|p__Cyanobacteria|o__Nostocales|f__Aphanizomenonaceae|g__Dolichospermum|s__Dolichospermum compactum	142	146	107	180	197	111	67	87	223	80	316	59	d__Bacteria	p__Cyanobacteria	o__Nostocales	f__Aphanizomenonaceae	g__Dolichospermum	s__Dolichospermum compactum
d__Bacteria|p__Cyanobacteria|o__Nostocales|f__Aphanizomenonaceae|g__Sphaerospermopsis|s__Sphaerospermopsis kisseleviana	103	95	104	123	140	151	159	162	123	153	133	133	d__Bacteria	p__Cyanobacteria	o__Nostocales	f__Aphanizomenonaceae	g__Sphaerospermopsis	s__Sphaerospermopsis kisseleviana
d__Bacteria|p__Cyanobacteria|o__Nostocales|f__Aphanizomenonaceae|g__Nodularia|s__Nodularia spumigena	59	81	69	87	81	65	72	61	67	45	80	68	d__Bacteria	p__Cyanobacteria	o__Nostocales	f__Aphanizomenonaceae	g__Nodularia	s__Nodularia spumigena
d__Bacteria|p__Cyanobacteria|o__Nostocales|f__Aphanizomenonaceae|g__Anabaenopsis|s__Anabaenopsis circularis	22	25	15	32	29	39	53	38	25	47	39	36	d__Bacteria	p__Cyanobacteria	o__Nostocales	f__Aphanizomenonaceae	g__Anabaenopsis	s__Anabaenopsis circularis
d__Bacteria|p__Cyanobacteria|o__Nostocales|f__Aphanizomenonaceae|g__Raphidiopsis|s__Raphidiopsis curvata	13	26	13	27	24	29	13	22	17	20	32	26	d__Bacteria	p__Cyanobacteria	o__Nostocales	f__Aphanizomenonaceae	g__Raphidiopsis	s__Raphidiopsis curvata
d__Bacteria|p__Cyanobacteria|o__Nostocales|f__Hapalosiphonaceae|g__Fischerella|s__Fischerella sp. NIES-4106	86	62	64	84	71	87	76	65	56	69	50	65	d__Bacteria	p__Cyanobacteria	o__Nostocales	f__Hapalosiphonaceae	g__Fischerella	s__Fischerella sp. NIES-4106
d__Bacteria|p__Cyanobacteria|o__Nostocales|f__Hapalosiphonaceae|g__Fischerella|s__Fischerella sp. NIES-3754	67	94	96	113	108	178	126	101	75	102	93	78	d__Bacteria	p__Cyanobacteria	o__Nostocales	f__Hapalosiphonaceae	g__Fischerella	s__Fischerella sp. NIES-3754
d__Bacteria|p__Cyanobacteria|o__Nostocales|f__Scytonemataceae|g__Scytonema|s__Scytonema sp. HK-05	41	44	40	45	62	28	26	28	41	21	46	38	d__Bacteria	p__Cyanobacteria	o__Nostocales	f__Scytonemataceae	g__Scytonema	s__Scytonema sp. HK-05
d__Bacteria|p__Cyanobacteria|o__Nostocales|f__Scytonemataceae|g__Scytonema|s__Scytonema sp. NIES-4073	26	29	26	27	45	39	34	34	30	34	40	44	d__Bacteria	p__Cyanobacteria	o__Nostocales	f__Scytonemataceae	g__Scytonema	s__Scytonema sp. NIES-4073
d__Bacteria|p__Cyanobacteria|c__Gloeobacteria|o__Gloeobacterales|f__Gloeobacteraceae|g__Gloeobacter	557	599	448	457	514	385	382	359	389	410	329	417	d__Bacteria	p__Cyanobacteria	c__Gloeobacteria	o__Gloeobacterales	f__Gloeobacteraceae	g__Gloeobacter
d__Bacteria|p__Cyanobacteria|o__Pleurocapsales|f__Dermocarpellaceae|g__Stanieria|s__Stanieria cyanosphaera	61	114	122	105	110	288	126	89	72	120	78	125	d__Bacteria	p__Cyanobacteria	o__Pleurocapsales	f__Dermocarpellaceae	g__Stanieria	s__Stanieria cyanosphaera
d__Bacteria|p__Cyanobacteria|o__Pleurocapsales|f__Dermocarpellaceae|g__Stanieria|s__Stanieria sp. NIES-3757	20	21	25	24	21	27	35	36	24	30	33	49	d__Bacteria	p__Cyanobacteria	o__Pleurocapsales	f__Dermocarpellaceae	g__Stanieria	s__Stanieria sp. NIES-3757
d__Bacteria|p__Cyanobacteria|o__Pleurocapsales|f__Hyellaceae|g__Pleurocapsa|s__Pleurocapsa minor	88	69	63	62	70	79	83	75	83	72	71	61	d__Bacteria	p__Cyanobacteria	o__Pleurocapsales	f__Hyellaceae	g__Pleurocapsa	s__Pleurocapsa minor
d__Bacteria|p__Cyanobacteria|o__Chroococcidiopsidales|f__Chroococcidiopsidaceae|g__Chroococcidiopsis|s__Chroococcidiopsis thermalis	148	113	133	106	153	158	112	99	88	141	115	197	d__Bacteria	p__Cyanobacteria	o__Chroococcidiopsidales	f__Chroococcidiopsidaceae	g__Chroococcidiopsis	s__Chroococcidiopsis thermalis
d__Bacteria|p__Cyanobacteria|o__Gloeoemargaritales|f__Gloeomargaritaceae|g__Gloeomargarita|s__Gloeomargarita lithophora	105	293	270	327	278	658	635	309	227	282	392	452	d__Bacteria	p__Cyanobacteria	o__Gloeoemargaritales	f__Gloeomargaritaceae	g__Gloeomargarita	s__Gloeomargarita lithophora
d__Bacteria|p__Deinococcus-Thermus|c__Deinococci|o__Deinococcales|f__Deinococcaceae|g__Deinococcus	3928	5097	4225	4220	3959	5038	3856	3100	3238	3355	3883	4249	d__Bacteria	p__Deinococcus-Thermus	c__Deinococci	o__Deinococcales	f__Deinococcaceae	g__Deinococcus
d__Bacteria|p__Deinococcus-Thermus|c__Deinococci|o__Deinococcales|f__Trueperaceae|g__Truepera	141	182	148	178	145	172	170	197	130	176	147	177	d__Bacteria	p__Deinococcus-Thermus	c__Deinococci	o__Deinococcales	f__Trueperaceae	g__Truepera
d__Bacteria|p__Deinococcus-Thermus|c__Deinococci|o__Thermales|f__Thermaceae|g__Thermus	1179	1406	1027	1277	1217	1019	960	975	1056	1064	1110	1324	d__Bacteria	p__Deinococcus-Thermus	c__Deinococci	o__Thermales	f__Thermaceae	g__Thermus
d__Bacteria|p__Deinococcus-Thermus|c__Deinococci|o__Thermales|f__Thermaceae|g__Meiothermus	258	318	239	278	321	260	273	220	233	276	218	296	d__Bacteria	p__Deinococcus-Thermus	c__Deinococci	o__Thermales	f__Thermaceae	g__Meiothermus
d__Bacteria|p__Deinococcus-Thermus|c__Deinococci|o__Thermales|f__Thermaceae|g__Oceanithermus	238	290	210	254	276	222	259	224	234	296	203	274	d__Bacteria	p__Deinococcus-Thermus	c__Deinococci	o__Thermales	f__Thermaceae	g__Oceanithermus
d__Bacteria|p__Deinococcus-Thermus|c__Deinococci|o__Thermales|f__Thermaceae|g__Marinithermus	159	200	173	188	208	240	239	182	127	197	140	201	d__Bacteria	p__Deinococcus-Thermus	c__Deinococci	o__Thermales	f__Thermaceae	g__Marinithermus
d__Bacteria|p__Armatimonadetes|c__Fimbriimonadia|o__Fimbriimonadales|f__Fimbriimonadaceae|g__Fimbriimonas	5776	2324	2209	2994	2359	4121	3091	3597	3073	3343	3528	2726	d__Bacteria	p__Armatimonadetes	c__Fimbriimonadia	o__Fimbriimonadales	f__Fimbriimonadaceae	g__Fimbriimonas
d__Bacteria|p__Armatimonadetes|c__Chthonomonadetes|o__Chthonomonadales|f__Chthonomonadaceae|g__Chthonomonas	88	105	130	114	74	245	141	76	66	91	86	118	d__Bacteria	p__Armatimonadetes	c__Chthonomonadetes	o__Chthonomonadales	f__Chthonomonadaceae	g__Chthonomonas
d__Bacteria|p__Tenericutes|c__Mollicutes|o__Mycoplasmatales|f__Mycoplasmataceae|g__Mycoplasma	2743	3204	3611	3453	3750	5393	3830	3109	2835	3273	3489	3516	d__Bacteria	p__Tenericutes	c__Mollicutes	o__Mycoplasmatales	f__Mycoplasmataceae	g__Mycoplasma
d__Bacteria|p__Tenericutes|c__Mollicutes|o__Mycoplasmatales|f__Mycoplasmataceae|g__Ureaplasma	23	35	24	24	38	31	43	39	24	36	41	55	d__Bacteria	p__Tenericutes	c__Mollicutes	o__Mycoplasmatales	f__Mycoplasmataceae	g__Ureaplasma
d__Bacteria|p__Tenericutes|c__Mollicutes|o__Entomoplasmatales|f__Spiroplasmataceae|g__Spiroplasma	694	757	644	938	961	797	939	681	759	775	977	977	d__Bacteria	p__Tenericutes	c__Mollicutes	o__Entomoplasmatales	f__Spiroplasmataceae	g__Spiroplasma
d__Bacteria|p__Tenericutes|c__Mollicutes|o__Entomoplasmatales|f__Entomoplasmataceae|g__Entomoplasma	324	287	264	532	510	605	712	749	663	1052	1066	1169	d__Bacteria	p__Tenericutes	c__Mollicutes	o__Entomoplasmatales	f__Entomoplasmataceae	g__Entomoplasma
d__Bacteria|p__Tenericutes|c__Mollicutes|o__Entomoplasmatales|f__Entomoplasmataceae|g__Mesoplasma	293	467	403	313	465	423	455	364	302	393	332	383	d__Bacteria	p__Tenericutes	c__Mollicutes	o__Entomoplasmatales	f__Entomoplasmataceae	g__Mesoplasma
d__Bacteria|p__Tenericutes|c__Mollicutes|o__Acholeplasmatales|f__Acholeplasmataceae|g__Acholeplasma	827	818	738	747	823	843	790	747	669	862	708	761	d__Bacteria	p__Tenericutes	c__Mollicutes	o__Acholeplasmatales	f__Acholeplasmataceae	g__Acholeplasma
d__Bacteria|p__Tenericutes|c__Mollicutes|o__Acholeplasmatales|f__Acholeplasmataceae|g__Candidatus Phytoplasma	86	102	97	128	149	128	166	129	119	164	151	207	d__Bacteria	p__Tenericutes	c__Mollicutes	o__Acholeplasmatales	f__Acholeplasmataceae	g__Candidatus Phytoplasma
d__Bacteria|p__Coprothermobacterota|c__Coprothermobacteria|o__Coprothermobacterales|f__Coprothermobacteraceae|g__Coprothermobacter	317	632	860	492	389	1256	469	344	309	382	394	426	d__Bacteria	p__Coprothermobacterota	c__Coprothermobacteria	o__Coprothermobacterales	f__Coprothermobacteraceae	g__Coprothermobacter
d__Bacteria|p__Proteobacteria|c__Gammaproteobacteria|o__Xanthomonadales|f__Xanthomonadaceae|g__Stenotrophomonas	208245	188283	162376	197150	291574	372550	200847	221062	179963	207730	276266	400142	d__Bacteria	p__Proteobacteria	c__Gammaproteobacteria	o__Xanthomonadales	f__Xanthomonadaceae	g__Stenotrophomonas
d__Bacteria|p__Proteobacteria|c__Gammaproteobacteria|o__Xanthomonadales|f__Xanthomonadaceae|g__Xanthomonas	1963	2071	1678	2032	2332	2563	2045	1994	1769	1973	2369	2806	d__Bacteria	p__Proteobacteria	c__Gammaproteobacteria	o__Xanthomonadales	f__Xanthomonadaceae	g__Xanthomonas
d__Bacteria|p__Proteobacteria|c__Gammaproteobacteria|o__Xanthomonadales|f__Xanthomonadaceae|g__Lysobacter	966	988	847	921	1116	1308	949	889	867	989	1076	1347	d__Bacteria	p__Proteobacteria	c__Gammaproteobacteria	o__Xanthomonadales	f__Xanthomonadaceae	g__Lysobacter
d__Bacteria|p__Proteobacteria|c__Gammaproteobacteria|o__Xanthomonadales|f__Xanthomonadaceae|g__Pseudoxanthomonas	713	705	597	820	897	780	651	608	663	597	771	786	d__Bacteria	p__Proteobacteria	c__Gammaproteobacteria	o__Xanthomonadales	f__Xanthomonadaceae	g__Pseudoxanthomonas
d__Bacteria|p__Proteobacteria|c__Gammaproteobacteria|o__Xanthomonadales|f__Xanthomonadaceae|g__Luteimonas	459	545	436	599	585	777	463	476	553	470	662	811	d__Bacteria	p__Proteobacteria	c__Gammaproteobacteria	o__Xanthomonadales	f__Xanthomonadaceae	g__Luteimonas
d__Bacteria|p__Proteobacteria|c__Gammaproteobacteria|o__Xanthomonadales|f__Xanthomonadaceae|g__Xylella	249	240	216	215	286	357	228	199	197	208	313	383	d__Bacteria	p__Proteobacteria	c__Gammaproteobacteria	o__Xanthomonadales	f__Xanthomonadaceae	g__Xylella
d__Bacteria|p__Proteobacteria|c__Gammaproteobacteria|o__Xanthomonadales|f__Rhodanobacteraceae|g__Luteibacter	903	532	616	727	812	744	464	606	460	426	613	403	d__Bacteria	p__Proteobacteria	c__Gammaproteobacteria	o__Xanthomonadales	f__Rhodanobacteraceae	g__Luteibacter
d__Bacteria|p__Proteobacteria|c__Gammaproteobacteria|o__Xanthomonadales|f__Rhodanobacteraceae|g__Rhodanobacter	383	265	259	239	258	220	192	201	236	200	169	180	d__Bacteria	p__Proteobacteria	c__Gammaproteobacteria	o__Xanthomonadales	f__Rhodanobacteraceae	g__Rhodanobacter
d__Bacteria|p__Proteobacteria|c__Gammaproteobacteria|o__Xanthomonadales|f__Rhodanobacteraceae|g__Dyella	323	328	250	291	325	271	240	220	249	255	258	304	d__Bacteria	p__Proteobacteria	c__Gammaproteobacteria	o__Xanthomonadales	f__Rhodanobacteraceae	g__Dyella
d__Bacteria|p__Proteobacteria|c__Gammaproteobacteria|o__Xanthomonadales|f__Rhodanobacteraceae|g__Dokdonella	171	206	198	171	190	187	152	176	160	178	164	204	d__Bacteria	p__Proteobacteria	c__Gammaproteobacteria	o__Xanthomonadales	f__Rhodanobacteraceae	g__Dokdonella
d__Bacteria|p__Proteobacteria|c__Gammaproteobacteria|o__Xanthomonadales|f__Rhodanobacteraceae|g__Frateuria	137	228	185	184	264	249	225	219	203	217	204	246	d__Bacteria	p__Proteobacteria	c__Gammaproteobacteria	o__Xanthomonadales	f__Rhodanobacteraceae	g__Frateuria
d__Bacteria|p__Proteobacteria|c__Gammaproteobacteria|o__Xanthomonadales|f__Rhodanobacteraceae|g__Ahniella	103	102	83	98	145	132	89	91	101	111	113	109	d__Bacteria	p__Proteobacteria	c__Gammaproteobacteria	o__Xanthomonadales	f__Rhodanobacteraceae	g__Ahniella
d__Bacteria|p__Proteobacteria|c__Gammaproteobacteria|o__Enterobacterales|f__Enterobacteriaceae|g__Candidatus Ishikawaella	3463	2700	2194	1228	1450	3533	6307	4060	2131	3707	1250	1646	d__Bacteria	p__Proteobacteria	c__Gammaproteobacteria	o__Enterobacterales	f__Enterobacteriaceae	g__Candidatus Ishikawaella
d__Bacteria|p__Proteobacteria|c__Gammaproteobacteria|o__Enterobacterales|f__Enterobacteriaceae|g__Escherichia	1969	1927	1616	2025	2526	2445	3167	2064	1773	3083	2992	3798	d__Bacteria	p__Proteobacteria	c__Gammaproteobacteria	o__Enterobacterales	f__Enterobacteriaceae	g__Escherichia
d__Bacteria|p__Proteobacteria|c__Gammaproteobacteria|o__Enterobacterales|f__Enterobacteriaceae|g__Klebsiella	1840	1969	1799	2146	2275	1890	1656	1642	1535	1925	1821	2245	d__Bacteria	p__Proteobacteria	c__Gammaproteobacteria	o__Enterobacterales	f__Enterobacteriaceae	g__Klebsiella
d__Bacteria|p__Proteobacteria|c__Gammaproteobacteria|o__Enterobacterales|f__Enterobacteriaceae|g__Cronobacter	1770	1587	1654	1576	2748	1545	1755	1901	1384	2716	1465	2202	d__Bacteria	p__Proteobacteria	c__Gammaproteobacteria	o__Enterobacterales	f__Enterobacteriaceae	g__Cronobacter
d__Bacteria|p__Proteobacteria|c__Gammaproteobacteria|o__Enterobacterales|f__Enterobacteriaceae|g__Enterobacter	1283	1423	1166	1474	1865	1363	1564	1270	1197	1769	1413	1643	d__Bacteria	p__Proteobacteria	c__Gammaproteobacteria	o__Enterobacterales	f__Enterobacteriaceae	g__Enterobacter
d__Bacteria|p__Proteobacteria|c__Gammaproteobacteria|o__Enterobacterales|f__Enterobacteriaceae|s__secondary endosymbiont of Trabutina mannipara	358	1064	1364	731	663	3493	1059	385	204	409	830	867	d__Bacteria	p__Proteobacteria	c__Gammaproteobacteria	o__Enterobacterales	f__Enterobacteriaceae	s__secondary endosymbiont of Trabutina mannipara
d__Bacteria|p__Proteobacteria|c__Gammaproteobacteria|o__Enterobacterales|f__Enterobacteriaceae|g__Candidatus Purcelliella	95	68	113	74	87	82	87	79	80	63	78	76	d__Bacteria	p__Proteobacteria	c__Gammaproteobacteria	o__Enterobacterales	f__Enterobacteriaceae	g__Candidatus Purcelliella
d__Bacteria|p__Proteobacteria|c__Gammaproteobacteria|o__Enterobacterales|f__Enterobacteriaceae|g__Candidatus Blochmannia	81	85	70	91	99	138	150	99	105	92	118	140	d__Bacteria	p__Proteobacteria	c__Gammaproteobacteria	o__Enterobacterales	f__Enterobacteriaceae	g__Candidatus Blochmannia
d__Bacteria|p__Proteobacteria|c__Gammaproteobacteria|o__Enterobacterales|f__Enterobacteriaceae|g__Candidatus Doolittlea	66	761	663	487	981	1900	1981	1831	1048	1875	985	829	d__Bacteria	p__Proteobacteria	c__Gammaproteobacteria	o__Enterobacterales	f__Enterobacteriaceae	g__Candidatus Doolittlea
d__Bacteria|p__Proteobacteria|c__Gammaproteobacteria|o__Enterobacterales|f__Enterobacteriaceae|g__Candidatus Hamiltonella	35	37	33	30	45	48	66	52	61	43	48	45	d__Bacteria	p__Proteobacteria	c__Gammaproteobacteria	o__Enterobacterales	f__Enterobacteriaceae	g__Candidatus Hamiltonella
d__Bacteria|p__Proteobacteria|c__Gammaproteobacteria|o__Enterobacterales|f__Enterobacteriaceae|s__secondary endosymbiont of Ctenarytaina eucalypti	16	12	8	8	19	13	13	15	6	12	9	15	d__Bacteria	p__Proteobacteria	c__Gammaproteobacteria	o__Enterobacterales	f__Enterobacteriaceae	s__secondary endosymbiont of Ctenarytaina eucalypti
d__Bacteria|p__Proteobacteria|c__Gammaproteobacteria|o__Enterobacterales|f__Enterobacteriaceae|s__secondary endosymbiont of Heteropsylla cubana	8	19	10	12	28	16	9	14	16	19	24	25	d__Bacteria	p__Proteobacteria	c__Gammaproteobacteria	o__Enterobacterales	f__Enterobacteriaceae	s__secondary endosymbiont of Heteropsylla cubana
d__Bacteria|p__Proteobacteria|c__Gammaproteobacteria|o__Enterobacterales|f__Enterobacteriaceae|g__Candidatus Hoaglandella	25	28	22	26	34	27	22	34	17	41	35	36	d__Bacteria	p__Proteobacteria	c__Gammaproteobacteria	o__Enterobacterales	f__Enterobacteriaceae	g__Candidatus Hoaglandella
d__Bacteria|p__Proteobacteria|c__Gammaproteobacteria|o__Enterobacterales|f__Enterobacteriaceae|g__Candidatus Gullanella	20	16	18	27	28	31	29	29	18	27	29	39	d__Bacteria	p__Proteobacteria	c__Gammaproteobacteria	o__Enterobacterales	f__Enterobacteriaceae	g__Candidatus Gullanella
d__Bacteria|p__Proteobacteria|c__Gammaproteobacteria|o__Enterobacterales|f__Enterobacteriaceae|g__Candidatus Mikella	18	6	7	11	13	12	29	6	9	15	14	38	d__Bacteria	p__Proteobacteria	c__Gammaproteobacteria	o__Enterobacterales	f__Enterobacteriaceae	g__Candidatus Mikella
d__Bacteria|p__Proteobacteria|c__Gammaproteobacteria|o__Enterobacterales|f__Enterobacteriaceae|g__Candidatus Tachikawaea	7	12	15	18	29	24	30	20	18	29	24	25	d__Bacteria	p__Proteobacteria	c__Gammaproteobacteria	o__Enterobacterales	f__Enterobacteriaceae	g__Candidatus Tachikawaea
d__Bacteria|p__Proteobacteria|c__Gammaproteobacteria|o__Enterobacterales|f__Enterobacteriaceae|s__Plautia stali symbiont	174	258	92	101	148	244	260	212	190	256	348	318	d__Bacteria	p__Proteobacteria	c__Gammaproteobacteria	o__Enterobacterales	f__Enterobacteriaceae	s__Plautia stali symbiont
d__Bacteria|p__Proteobacteria|c__Gammaproteobacteria|o__Enterobacterales|f__Enterobacteriaceae|s__Enterobacteriaceae bacterium w17	59	58	45	44	48	51	57	55	43	44	45	38	d__Bacteria	p__Proteobacteria	c__Gammaproteobacteria	o__Enterobacterales	f__Enterobacteriaceae	s__Enterobacteriaceae bacterium w17
d__Bacteria|p__Proteobacteria|c__Gammaproteobacteria|o__Enterobacterales|f__Enterobacteriaceae|s__Enterobacteriaceae bacterium strain FGI 57	46	41	36	41	45	49	55	45	36	52	56	72	d__Bacteria	p__Proteobacteria	c__Gammaproteobacteria	o__Enterobacterales	f__Enterobacteriaceae	s__Enterobacteriaceae bacterium strain FGI 57
d__Bacteria|p__Proteobacteria|c__Gammaproteobacteria|o__Enterobacterales|f__Enterobacteriaceae|s__Enterobacteriaceae bacterium ENNIH1	28	34	24	25	26	47	40	37	34	50	35	38	d__Bacteria	p__Proteobacteria	c__Gammaproteobacteria	o__Enterobacterales	f__Enterobacteriaceae	s__Enterobacteriaceae bacterium ENNIH1
d__Bacteria|p__Proteobacteria|c__Gammaproteobacteria|o__Enterobacterales|f__Enterobacteriaceae|s__Enterobacteriaceae bacterium w6	9	14	13	12	10	10	7	12	6	14	15	11	d__Bacteria	p__Proteobacteria	c__Gammaproteobacteria	o__Enterobacterales	f__Enterobacteriaceae	s__Enterobacteriaceae bacterium w6
d__Bacteria|p__Proteobacteria|c__Gammaproteobacteria|o__Enterobacterales|f__Enterobacteriaceae|s__Enterobacteriaceae bacterium ENNIH3	1	1	0	1	2	0	1	2	0	0	4	3	d__Bacteria	p__Proteobacteria	c__Gammaproteobacteria	o__Enterobacterales	f__Enterobacteriaceae	s__Enterobacteriaceae bacterium ENNIH3
d__Bacteria|p__Proteobacteria|c__Gammaproteobacteria|o__Enterobacterales|f__Enterobacteriaceae|s__Enterobacteriaceae bacterium S05	1	1	0	0	0	1	1	2	0	1	5	0	d__Bacteria	p__Proteobacteria	c__Gammaproteobacteria	o__Enterobacterales	f__Enterobacteriaceae	s__Enterobacteriaceae bacterium S05
d__Bacteria|p__Proteobacteria|c__Gammaproteobacteria|o__Enterobacterales|f__Enterobacteriaceae|g__Salmonella	1072	1302	1074	2234	1141	922	1638	1009	1183	2967	3970	5222	d__Bacteria	p__Proteobacteria	c__Gammaproteobacteria	o__Enterobacterales	f__Enterobacteriaceae	g__Salmonella
d__Bacteria|p__Proteobacteria|c__Gammaproteobacteria|o__Enterobacterales|f__Enterobacteriaceae|g__Citrobacter	910	1125	935	1045	1148	1121	1210	1028	960	1294	1127	1420	d__Bacteria	p__Proteobacteria	c__Gammaproteobacteria	o__Enterobacterales	f__Enterobacteriaceae	g__Citrobacter
d__Bacteria|p__Proteobacteria|c__Gammaproteobacteria|o__Enterobacterales|f__Enterobacteriaceae|g__Kosakonia	400	515	397	473	501	380	420	341	317	316	367	427	d__Bacteria	p__Proteobacteria	c__Gammaproteobacteria	o__Enterobacterales	f__Enterobacteriaceae	g__Kosakonia
d__Bacteria|p__Proteobacteria|c__Gammaproteobacteria|o__Enterobacterales|f__Enterobacteriaceae|g__Lelliottia	317	299	282	313	398	316	379	298	329	326	411	376	d__Bacteria	p__Proteobacteria	c__Gammaproteobacteria	o__Enterobacterales	f__Enterobacteriaceae	g__Lelliottia
d__Bacteria|p__Proteobacteria|c__Gammaproteobacteria|o__Enterobacterales|f__Enterobacteriaceae|g__Pluralibacter	234	332	277	301	319	276	274	248	226	238	228	309	d__Bacteria	p__Proteobacteria	c__Gammaproteobacteria	o__Enterobacterales	f__Enterobacteriaceae	g__Pluralibacter
d__Bacteria|p__Proteobacteria|c__Gammaproteobacteria|o__Enterobacterales|f__Enterobacteriaceae|g__Raoultella	204	213	173	213	265	168	231	169	165	225	227	270	d__Bacteria	p__Proteobacteria	c__Gammaproteobacteria	o__Enterobacterales	f__Enterobacteriaceae	g__Raoultella
d__Bacteria|p__Proteobacteria|c__Gammaproteobacteria|o__Enterobacterales|f__Enterobacteriaceae|g__Cedecea	144	163	139	160	179	175	171	153	153	153	161	178	d__Bacteria	p__Proteobacteria	c__Gammaproteobacteria	o__Enterobacterales	f__Enterobacteriaceae	g__Cedecea
d__Bacteria|p__Proteobacteria|c__Gammaproteobacteria|o__Enterobacterales|f__Enterobacteriaceae|g__Limnobaculum	125	75	124	115	105	114	176	97	76	177	114	112	d__Bacteria	p__Proteobacteria	c__Gammaproteobacteria	o__Enterobacterales	f__Enterobacteriaceae	g__Limnobaculum
d__Bacteria|p__Proteobacteria|c__Gammaproteobacteria|o__Enterobacterales|f__Enterobacteriaceae|g__Gibbsiella	122	114	77	93	120	115	149	97	89	121	100	105	d__Bacteria	p__Proteobacteria	c__Gammaproteobacteria	o__Enterobacterales	f__Enterobacteriaceae	g__Gibbsiella
d__Bacteria|p__Proteobacteria|c__Gammaproteobacteria|o__Enterobacterales|f__Enterobacteriaceae|g__Leclercia	88	111	82	98	104	100	104	78	77	123	107	112	d__Bacteria	p__Proteobacteria	c__Gammaproteobacteria	o__Enterobacterales	f__Enterobacteriaceae	g__Leclercia
d__Bacteria|p__Proteobacteria|c__Gammaproteobacteria|o__Enterobacterales|f__Enterobacteriaceae|g__Kluyvera	55	50	42	57	57	41	47	34	48	49	46	46	d__Bacteria	p__Proteobacteria	c__Gammaproteobacteria	o__Enterobacterales	f__Enterobacteriaceae	g__Kluyvera
d__Bacteria|p__Proteobacteria|c__Gammaproteobacteria|o__Enterobacterales|f__Enterobacteriaceae|g__Shimwellia	55	39	48	55	44	48	66	35	30	47	35	77	d__Bacteria	p__Proteobacteria	c__Gammaproteobacteria	o__Enterobacterales	f__Enterobacteriaceae	g__Shimwellia
d__Bacteria|p__Proteobacteria|c__Gammaproteobacteria|o__Enterobacterales|f__Enterobacteriaceae|g__Candidatus Riesia	38	138	179	125	173	370	380	354	261	566	283	264	d__Bacteria	p__Proteobacteria	c__Gammaproteobacteria	o__Enterobacterales	f__Enterobacteriaceae	g__Candidatus Riesia
d__Bacteria|p__Proteobacteria|c__Gammaproteobacteria|o__Enterobacterales|f__Enterobacteriaceae|g__Shigella	24	26	23	25	26	42	45	30	25	66	34	37	d__Bacteria	p__Proteobacteria	c__Gammaproteobacteria	o__Enterobacterales	f__Enterobacteriaceae	g__Shigella
d__Bacteria|p__Proteobacteria|c__Gammaproteobacteria|o__Enterobacterales|f__Enterobacteriaceae|g__Candidatus Moranella	22	28	26	30	32	38	64	32	36	44	35	55	d__Bacteria	p__Proteobacteria	c__Gammaproteobacteria	o__Enterobacterales	f__Enterobacteriaceae	g__Candidatus Moranella
d__Bacteria|p__Proteobacteria|c__Gammaproteobacteria|o__Enterobacterales|f__Morganellaceae|g__Morganella	16333	19515	19875	20884	32175	23712	23406	16242	12301	15882	12065	7245	d__Bacteria	p__Proteobacteria	c__Gammaproteobacteria	o__Enterobacterales	f__Morganellaceae	g__Morganella
d__Bacteria|p__Proteobacteria|c__Gammaproteobacteria|o__Enterobacterales|f__Morganellaceae|g__Providencia	401	457	372	474	518	417	339	297	404	352	502	422	d__Bacteria	p__Proteobacteria	c__Gammaproteobacteria	o__Enterobacterales	f__Morganellaceae	g__Providencia
d__Bacteria|p__Proteobacteria|c__Gammaproteobacteria|o__Enterobacterales|f__Morganellaceae|g__Xenorhabdus	220	194	200	178	251	169	193	194	164	215	206	283	d__Bacteria	p__Proteobacteria	c__Gammaproteobacteria	o__Enterobacterales	f__Morganellaceae	g__Xenorhabdus
d__Bacteria|p__Proteobacteria|c__Gammaproteobacteria|o__Enterobacterales|f__Morganellaceae|g__Photorhabdus	145	153	105	133	132	141	169	128	113	122	152	156	d__Bacteria	p__Proteobacteria	c__Gammaproteobacteria	o__Enterobacterales	f__Morganellaceae	g__Photorhabdus
d__Bacteria|p__Proteobacteria|c__Gammaproteobacteria|o__Enterobacterales|f__Morganellaceae|g__Proteus	119	106	107	140	180	135	132	125	128	158	153	172	d__Bacteria	p__Proteobacteria	c__Gammaproteobacteria	o__Enterobacterales	f__Morganellaceae	g__Proteus
d__Bacteria|p__Proteobacteria|c__Gammaproteobacteria|o__Enterobacterales|f__Morganellaceae|g__Arsenophonus	64	71	56	68	90	70	79	66	55	74	101	65	d__Bacteria	p__Proteobacteria	c__Gammaproteobacteria	o__Enterobacterales	f__Morganellaceae	g__Arsenophonus
d__Bacteria|p__Proteobacteria|c__Gammaproteobacteria|o__Enterobacterales|f__Erwiniaceae|g__Wigglesworthia	6372	5172	6152	4556	7095	6065	7639	5551	5438	6562	2646	3493	d__Bacteria	p__Proteobacteria	c__Gammaproteobacteria	o__Enterobacterales	f__Erwiniaceae	g__Wigglesworthia
d__Bacteria|p__Proteobacteria|c__Gammaproteobacteria|o__Enterobacterales|f__Erwiniaceae|g__Pantoea	1840	3965	2934	2903	3960	7201	7358	6102	4338	6283	4283	3948	d__Bacteria	p__Proteobacteria	c__Gammaproteobacteria	o__Enterobacterales	f__Erwiniaceae	g__Pantoea
d__Bacteria|p__Proteobacteria|c__Gammaproteobacteria|o__Enterobacterales|f__Erwiniaceae|g__Erwinia	833	765	688	715	830	780	672	599	565	638	693	758	d__Bacteria	p__Proteobacteria	c__Gammaproteobacteria	o__Enterobacterales	f__Erwiniaceae	g__Erwinia
d__Bacteria|p__Proteobacteria|c__Gammaproteobacteria|o__Enterobacterales|f__Erwiniaceae|g__Buchnera	781	963	893	888	1237	1271	1679	1392	920	1188	1101	1087	d__Bacteria	p__Proteobacteria	c__Gammaproteobacteria	o__Enterobacterales	f__Erwiniaceae	g__Buchnera
d__Bacteria|p__Proteobacteria|c__Gammaproteobacteria|o__Enterobacterales|f__Erwiniaceae|g__Tatumella	70	92	89	95	88	90	93	79	81	93	110	105	d__Bacteria	p__Proteobacteria	c__Gammaproteobacteria	o__Enterobacterales	f__Erwiniaceae	g__Tatumella
d__Bacteria|p__Proteobacteria|c__Gammaproteobacteria|o__Enterobacterales|f__Yersiniaceae|g__Serratia	1865	2270	1822	2174	2331	1845	1882	1730	1741	1849	1852	2124	d__Bacteria	p__Proteobacteria	c__Gammaproteobacteria	o__Enterobacterales	f__Yersiniaceae	g__Serratia
d__Bacteria|p__Proteobacteria|c__Gammaproteobacteria|o__Enterobacterales|f__Yersiniaceae|g__Yersinia	812	921	871	929	1105	988	1041	951	793	1044	973	1227	d__Bacteria	p__Proteobacteria	c__Gammaproteobacteria	o__Enterobacterales	f__Yersiniaceae	g__Yersinia
d__Bacteria|p__Proteobacteria|c__Gammaproteobacteria|o__Enterobacterales|f__Yersiniaceae|g__Rahnella	468	503	420	423	455	402	319	314	312	306	301	337	d__Bacteria	p__Proteobacteria	c__Gammaproteobacteria	o__Enterobacterales	f__Yersiniaceae	g__Rahnella
d__Bacteria|p__Proteobacteria|c__Gammaproteobacteria|o__Enterobacterales|f__Yersiniaceae|g__Candidatus Fukatsuia	190	1550	1229	1386	2148	3742	3918	3816	2410	4192	2796	2127	d__Bacteria	p__Proteobacteria	c__Gammaproteobacteria	o__Enterobacterales	f__Yersiniaceae	g__Candidatus Fukatsuia
d__Bacteria|p__Proteobacteria|c__Gammaproteobacteria|o__Enterobacterales|f__Yersiniaceae|g__Chania	35	66	30	62	48	52	78	54	45	53	42	67	d__Bacteria	p__Proteobacteria	c__Gammaproteobacteria	o__Enterobacterales	f__Yersiniaceae	g__Chania
d__Bacteria|p__Proteobacteria|c__Gammaproteobacteria|o__Enterobacterales|f__Pectobacteriaceae|g__Dickeya	782	803	690	709	792	742	759	668	676	710	771	858	d__Bacteria	p__Proteobacteria	c__Gammaproteobacteria	o__Enterobacterales	f__Pectobacteriaceae	g__Dickeya
d__Bacteria|p__Proteobacteria|c__Gammaproteobacteria|o__Enterobacterales|f__Pectobacteriaceae|g__Pectobacterium	721	964	773	954	920	868	1118	848	772	1016	906	1315	d__Bacteria	p__Proteobacteria	c__Gammaproteobacteria	o__Enterobacterales	f__Pectobacteriaceae	g__Pectobacterium
d__Bacteria|p__Proteobacteria|c__Gammaproteobacteria|o__Enterobacterales|f__Pectobacteriaceae|g__Brenneria	227	243	186	218	236	250	201	191	215	223	203	232	d__Bacteria	p__Proteobacteria	c__Gammaproteobacteria	o__Enterobacterales	f__Pectobacteriaceae	g__Brenneria
d__Bacteria|p__Proteobacteria|c__Gammaproteobacteria|o__Enterobacterales|f__Pectobacteriaceae|g__Sodalis	223	221	214	228	250	244	230	191	160	229	221	266	d__Bacteria	p__Proteobacteria	c__Gammaproteobacteria	o__Enterobacterales	f__Pectobacteriaceae	g__Sodalis
d__Bacteria|p__Proteobacteria|c__Gammaproteobacteria|o__Enterobacterales|f__Pectobacteriaceae|g__Lonsdalea	46	64	45	68	55	56	34	52	53	39	53	52	d__Bacteria	p__Proteobacteria	c__Gammaproteobacteria	o__Enterobacterales	f__Pectobacteriaceae	g__Lonsdalea
d__Bacteria|p__Proteobacteria|c__Gammaproteobacteria|o__Enterobacterales|f__Hafniaceae|g__Edwardsiella	710	622	657	561	667	753	880	679	574	856	642	713	d__Bacteria	p__Proteobacteria	c__Gammaproteobacteria	o__Enterobacterales	f__Hafniaceae	g__Edwardsiella
d__Bacteria|p__Proteobacteria|c__Gammaproteobacteria|o__Enterobacterales|f__Hafniaceae|g__Hafnia	100	110	78	102	108	83	74	72	72	99	77	112	d__Bacteria	p__Proteobacteria	c__Gammaproteobacteria	o__Enterobacterales	f__Hafniaceae	g__Hafnia
d__Bacteria|p__Proteobacteria|c__Gammaproteobacteria|o__Enterobacterales|f__Hafniaceae|g__Obesumbacterium	45	84	95	102	80	185	84	57	56	85	70	95	d__Bacteria	p__Proteobacteria	c__Gammaproteobacteria	o__Enterobacterales	f__Hafniaceae	g__Obesumbacterium
d__Bacteria|p__Proteobacteria|c__Gammaproteobacteria|o__Enterobacterales|f__Budviciaceae|g__Pragia	516	483	428	448	642	158	126	123	189	135	173	145	d__Bacteria	p__Proteobacteria	c__Gammaproteobacteria	o__Enterobacterales	f__Budviciaceae	g__Pragia
d__Bacteria|p__Proteobacteria|c__Gammaproteobacteria|o__Enterobacterales|f__Budviciaceae|g__Leminorella	97	113	109	128	119	96	100	71	73	103	77	91	d__Bacteria	p__Proteobacteria	c__Gammaproteobacteria	o__Enterobacterales	f__Budviciaceae	g__Leminorella
d__Bacteria|p__Proteobacteria|c__Gammaproteobacteria|o__Enterobacterales|g__Plesiomonas|s__Plesiomonas shigelloides	55	37	32	43	65	55	64	54	42	66	57	63	d__Bacteria	p__Proteobacteria	c__Gammaproteobacteria	o__Enterobacterales	g__Plesiomonas	s__Plesiomonas shigelloides
d__Bacteria|p__Proteobacteria|c__Gammaproteobacteria|o__Enterobacterales|g__Phytobacter|s__Phytobacter sp. SCO41	9	20	9	22	13	15	18	15	15	8	7	7	d__Bacteria	p__Proteobacteria	c__Gammaproteobacteria	o__Enterobacterales	g__Phytobacter	s__Phytobacter sp. SCO41
d__Bacteria|p__Proteobacteria|c__Gammaproteobacteria|o__Pseudomonadales|f__Pseudomonadaceae|g__Pseudomonas	57933	60811	53878	55491	78597	56343	58850	57745	50079	61777	65406	89979	d__Bacteria	p__Proteobacteria	c__Gammaproteobacteria	o__Pseudomonadales	f__Pseudomonadaceae	g__Pseudomonas
d__Bacteria|p__Proteobacteria|c__Gammaproteobacteria|o__Pseudomonadales|f__Pseudomonadaceae|g__Azotobacter	281	349	296	282	274	260	263	231	228	271	192	288	d__Bacteria	p__Proteobacteria	c__Gammaproteobacteria	o__Pseudomonadales	f__Pseudomonadaceae	g__Azotobacter
d__Bacteria|p__Proteobacteria|c__Gammaproteobacteria|o__Pseudomonadales|f__Pseudomonadaceae|g__Oblitimonas	27	32	17	27	47	38	44	33	35	33	25	37	d__Bacteria	p__Proteobacteria	c__Gammaproteobacteria	o__Pseudomonadales	f__Pseudomonadaceae	g__Oblitimonas
d__Bacteria|p__Proteobacteria|c__Gammaproteobacteria|o__Pseudomonadales|f__Moraxellaceae|g__Acinetobacter	2636	2908	2585	2919	3222	3345	5148	4228	3085	5064	3905	4891	d__Bacteria	p__Proteobacteria	c__Gammaproteobacteria	o__Pseudomonadales	f__Moraxellaceae	g__Acinetobacter
d__Bacteria|p__Proteobacteria|c__Gammaproteobacteria|o__Pseudomonadales|f__Moraxellaceae|g__Moraxella	636	4997	5311	4451	6286	11545	12823	10593	5881	7696	5748	4329	d__Bacteria	p__Proteobacteria	c__Gammaproteobacteria	o__Pseudomonadales	f__Moraxellaceae	g__Moraxella
d__Bacteria|p__Proteobacteria|c__Gammaproteobacteria|o__Pseudomonadales|f__Moraxellaceae|g__Psychrobacter	269	348	326	345	392	344	298	316	287	296	370	356	d__Bacteria	p__Proteobacteria	c__Gammaproteobacteria	o__Pseudomonadales	f__Moraxellaceae	g__Psychrobacter
d__Bacteria|p__Proteobacteria|c__Gammaproteobacteria|o__Pseudomonadales|f__Moraxellaceae|s__Moraxellaceae bacterium HYN0046	144	293	266	261	313	441	549	496	397	473	396	406	d__Bacteria	p__Proteobacteria	c__Gammaproteobacteria	o__Pseudomonadales	f__Moraxellaceae	s__Moraxellaceae bacterium HYN0046
d__Bacteria|p__Proteobacteria|c__Gammaproteobacteria|o__Oceanospirillales|f__Halomonadaceae|g__Halomonas	7285	7180	6097	8537	8576	5226	9076	8229	5671	9905	8992	9760	d__Bacteria	p__Proteobacteria	c__Gammaproteobacteria	o__Oceanospirillales	f__Halomonadaceae	g__Halomonas
d__Bacteria|p__Proteobacteria|c__Gammaproteobacteria|o__Oceanospirillales|f__Halomonadaceae|g__Halotalea	205	200	188	176	190	97	78	73	95	89	80	66	d__Bacteria	p__Proteobacteria	c__Gammaproteobacteria	o__Oceanospirillales	f__Halomonadaceae	g__Halotalea
d__Bacteria|p__Proteobacteria|c__Gammaproteobacteria|o__Oceanospirillales|f__Halomonadaceae|g__Zymobacter	71	100	80	128	137	114	115	113	129	157	174	212	d__Bacteria	p__Proteobacteria	c__Gammaproteobacteria	o__Oceanospirillales	f__Halomonadaceae	g__Zymobacter
d__Bacteria|p__Proteobacteria|c__Gammaproteobacteria|o__Oceanospirillales|f__Halomonadaceae|g__Candidatus Carsonella	58	47	38	29	50	50	68	46	46	39	55	37	d__Bacteria	p__Proteobacteria	c__Gammaproteobacteria	o__Oceanospirillales	f__Halomonadaceae	g__Candidatus Carsonella
d__Bacteria|p__Proteobacteria|c__Gammaproteobacteria|o__Oceanospirillales|f__Halomonadaceae|g__Candidatus Portiera	24	50	47	53	53	60	55	39	39	48	46	49	d__Bacteria	p__Proteobacteria	c__Gammaproteobacteria	o__Oceanospirillales	f__Halomonadaceae	g__Candidatus Portiera
d__Bacteria|p__Proteobacteria|c__Gammaproteobacteria|o__Oceanospirillales|f__Halomonadaceae|g__Candidatus Evansia	4	13	6	11	12	17	18	14	14	18	12	12	d__Bacteria	p__Proteobacteria	c__Gammaproteobacteria	o__Oceanospirillales	f__Halomonadaceae	g__Candidatus Evansia
d__Bacteria|p__Proteobacteria|c__Gammaproteobacteria|o__Oceanospirillales|f__Halomonadaceae|g__Kushneria	145	204	138	140	166	215	191	237	197	227	177	215	d__Bacteria	p__Proteobacteria	c__Gammaproteobacteria	o__Oceanospirillales	f__Halomonadaceae	g__Kushneria
d__Bacteria|p__Proteobacteria|c__Gammaproteobacteria|o__Oceanospirillales|f__Halomonadaceae|g__Cobetia	81	86	58	123	79	82	58	58	56	81	116	117	d__Bacteria	p__Proteobacteria	c__Gammaproteobacteria	o__Oceanospirillales	f__Halomonadaceae	g__Cobetia
d__Bacteria|p__Proteobacteria|c__Gammaproteobacteria|o__Oceanospirillales|f__Halomonadaceae|g__Salinicola	67	77	67	62	72	79	66	70	56	62	58	77	d__Bacteria	p__Proteobacteria	c__Gammaproteobacteria	o__Oceanospirillales	f__Halomonadaceae	g__Salinicola
d__Bacteria|p__Proteobacteria|c__Gammaproteobacteria|o__Oceanospirillales|f__Halomonadaceae|g__Chromohalobacter	61	65	54	69	52	74	75	73	54	59	45	66	d__Bacteria	p__Proteobacteria	c__Gammaproteobacteria	o__Oceanospirillales	f__Halomonadaceae	g__Chromohalobacter
d__Bacteria|p__Proteobacteria|c__Gammaproteobacteria|o__Oceanospirillales|f__Alcanivoracaceae|g__Alcanivorax	3719	3061	3055	2218	3129	3075	1163	1731	1995	1539	1589	1138	d__Bacteria	p__Proteobacteria	c__Gammaproteobacteria	o__Oceanospirillales	f__Alcanivoracaceae	g__Alcanivorax
d__Bacteria|p__Proteobacteria|c__Gammaproteobacteria|o__Oceanospirillales|f__Alcanivoracaceae|g__Ketobacter	165	152	154	123	147	169	189	165	128	178	137	164	d__Bacteria	p__Proteobacteria	c__Gammaproteobacteria	o__Oceanospirillales	f__Alcanivoracaceae	g__Ketobacter
d__Bacteria|p__Proteobacteria|c__Gammaproteobacteria|o__Oceanospirillales|f__Saccharospirillaceae|g__Gynuella	471	693	522	782	632	526	420	398	417	602	559	966	d__Bacteria	p__Proteobacteria	c__Gammaproteobacteria	o__Oceanospirillales	f__Saccharospirillaceae	g__Gynuella
d__Bacteria|p__Proteobacteria|c__Gammaproteobacteria|o__Oceanospirillales|f__Saccharospirillaceae|g__Saccharospirillum	118	130	70	94	113	128	120	96	108	134	101	144	d__Bacteria	p__Proteobacteria	c__Gammaproteobacteria	o__Oceanospirillales	f__Saccharospirillaceae	g__Saccharospirillum
d__Bacteria|p__Proteobacteria|c__Gammaproteobacteria|o__Oceanospirillales|f__Saccharospirillaceae|g__Reinekea	38	38	38	40	38	55	40	31	40	46	54	52	d__Bacteria	p__Proteobacteria	c__Gammaproteobacteria	o__Oceanospirillales	f__Saccharospirillaceae	g__Reinekea
d__Bacteria|p__Proteobacteria|c__Gammaproteobacteria|o__Oceanospirillales|f__Oceanospirillaceae|g__Marinomonas	114	144	110	141	149	127	132	148	131	144	155	179	d__Bacteria	p__Proteobacteria	c__Gammaproteobacteria	o__Oceanospirillales	f__Oceanospirillaceae	g__Marinomonas
d__Bacteria|p__Proteobacteria|c__Gammaproteobacteria|o__Oceanospirillales|f__Oceanospirillaceae|g__Thalassolituus	77	98	70	126	97	125	118	102	81	115	120	133	d__Bacteria	p__Proteobacteria	c__Gammaproteobacteria	o__Oceanospirillales	f__Oceanospirillaceae	g__Thalassolituus
d__Bacteria|p__Proteobacteria|c__Gammaproteobacteria|o__Oceanospirillales|f__Oceanospirillaceae|g__Marinobacterium	72	87	76	79	93	101	128	112	103	120	107	103	d__Bacteria	p__Proteobacteria	c__Gammaproteobacteria	o__Oceanospirillales	f__Oceanospirillaceae	g__Marinobacterium
d__Bacteria|p__Proteobacteria|c__Gammaproteobacteria|o__Oceanospirillales|f__Oceanospirillaceae|g__Bacterioplanes	58	95	91	94	91	131	112	92	49	100	103	111	d__Bacteria	p__Proteobacteria	c__Gammaproteobacteria	o__Oceanospirillales	f__Oceanospirillaceae	g__Bacterioplanes
d__Bacteria|p__Proteobacteria|c__Gammaproteobacteria|o__Oceanospirillales|f__Oceanospirillaceae|g__Oleispira	30	25	25	41	38	48	49	45	39	57	45	37	d__Bacteria	p__Proteobacteria	c__Gammaproteobacteria	o__Oceanospirillales	f__Oceanospirillaceae	g__Oleispira
d__Bacteria|p__Proteobacteria|c__Gammaproteobacteria|o__Oceanospirillales|f__Kangiellaceae|g__Kangiella	293	255	224	260	290	222	278	219	195	244	246	231	d__Bacteria	p__Proteobacteria	c__Gammaproteobacteria	o__Oceanospirillales	f__Kangiellaceae	g__Kangiella
d__Bacteria|p__Proteobacteria|c__Gammaproteobacteria|o__Oceanospirillales|f__Endozoicomonadaceae|g__Endozoicomonas	104	82	67	86	102	106	97	109	91	98	131	126	d__Bacteria	p__Proteobacteria	c__Gammaproteobacteria	o__Oceanospirillales	f__Endozoicomonadaceae	g__Endozoicomonas
d__Bacteria|p__Proteobacteria|c__Gammaproteobacteria|o__Oceanospirillales|f__Oleiphilaceae|g__Oleiphilus	60	58	54	47	56	86	113	73	55	100	59	123	d__Bacteria	p__Proteobacteria	c__Gammaproteobacteria	o__Oceanospirillales	f__Oleiphilaceae	g__Oleiphilus
d__Bacteria|p__Proteobacteria|c__Gammaproteobacteria|o__Oceanospirillales|f__Hahellaceae|g__Hahella	58	66	61	67	68	60	68	68	56	78	62	70	d__Bacteria	p__Proteobacteria	c__Gammaproteobacteria	o__Oceanospirillales	f__Hahellaceae	g__Hahella
d__Bacteria|p__Proteobacteria|c__Gammaproteobacteria|o__Alteromonadales|f__Alteromonadaceae|g__Marinobacter	1720	1862	1505	1731	1970	1675	1669	1445	1483	1664	1855	1795	d__Bacteria	p__Proteobacteria	c__Gammaproteobacteria	o__Alteromonadales	f__Alteromonadaceae	g__Marinobacter
d__Bacteria|p__Proteobacteria|c__Gammaproteobacteria|o__Alteromonadales|f__Alteromonadaceae|g__Alteromonas	1040	959	1034	1021	1078	811	1073	747	718	883	851	868	d__Bacteria	p__Proteobacteria	c__Gammaproteobacteria	o__Alteromonadales	f__Alteromonadaceae	g__Alteromonas
d__Bacteria|p__Proteobacteria|c__Gammaproteobacteria|o__Alteromonadales|f__Alteromonadaceae|g__Paraglaciecola	125	186	117	189	219	137	216	179	133	168	175	144	d__Bacteria	p__Proteobacteria	c__Gammaproteobacteria	o__Alteromonadales	f__Alteromonadaceae	g__Paraglaciecola
d__Bacteria|p__Proteobacteria|c__Gammaproteobacteria|o__Alteromonadales|f__Alteromonadaceae|g__Glaciecola	102	93	76	75	85	100	105	103	63	114	87	121	d__Bacteria	p__Proteobacteria	c__Gammaproteobacteria	o__Alteromonadales	f__Alteromonadaceae	g__Glaciecola
d__Bacteria|p__Proteobacteria|c__Gammaproteobacteria|o__Alteromonadales|f__Alteromonadaceae|g__Lacimicrobium	81	87	81	90	103	121	119	92	94	122	94	100	d__Bacteria	p__Proteobacteria	c__Gammaproteobacteria	o__Alteromonadales	f__Alteromonadaceae	g__Lacimicrobium
d__Bacteria|p__Proteobacteria|c__Gammaproteobacteria|o__Alteromonadales|f__Alteromonadaceae|g__Agarivorans	67	107	75	98	145	74	50	72	71	58	81	52	d__Bacteria	p__Proteobacteria	c__Gammaproteobacteria	o__Alteromonadales	f__Alteromonadaceae	g__Agarivorans
d__Bacteria|p__Proteobacteria|c__Gammaproteobacteria|o__Alteromonadales|f__Alteromonadaceae|g__Catenovulum	56	80	60	90	92	72	109	88	85	88	117	80	d__Bacteria	p__Proteobacteria	c__Gammaproteobacteria	o__Alteromonadales	f__Alteromonadaceae	g__Catenovulum
d__Bacteria|p__Proteobacteria|c__Gammaproteobacteria|o__Alteromonadales|f__Alteromonadaceae|g__Salinimonas	45	44	44	57	61	44	53	58	52	69	64	61	d__Bacteria	p__Proteobacteria	c__Gammaproteobacteria	o__Alteromonadales	f__Alteromonadaceae	g__Salinimonas
d__Bacteria|p__Proteobacteria|c__Gammaproteobacteria|o__Alteromonadales|f__Shewanellaceae|g__Shewanella	1233	1160	983	1252	1377	1188	1532	1183	1112	1299	1358	1482	d__Bacteria	p__Proteobacteria	c__Gammaproteobacteria	o__Alteromonadales	f__Shewanellaceae	g__Shewanella
d__Bacteria|p__Proteobacteria|c__Gammaproteobacteria|o__Alteromonadales|f__Pseudoalteromonadaceae|g__Pseudoalteromonas	1059	2117	1881	1868	2745	3861	4030	4221	2838	5127	3226	2882	d__Bacteria	p__Proteobacteria	c__Gammaproteobacteria	o__Alteromonadales	f__Pseudoalteromonadaceae	g__Pseudoalteromonas
d__Bacteria|p__Proteobacteria|c__Gammaproteobacteria|o__Alteromonadales|f__Psychromonadaceae|g__Psychromonas	511	558	450	411	510	995	652	698	483	602	649	870	d__Bacteria	p__Proteobacteria	c__Gammaproteobacteria	o__Alteromonadales	f__Psychromonadaceae	g__Psychromonas
d__Bacteria|p__Proteobacteria|c__Gammaproteobacteria|o__Alteromonadales|f__Colwelliaceae|g__Colwellia	323	297	230	422	360	308	304	300	235	317	397	442	d__Bacteria	p__Proteobacteria	c__Gammaproteobacteria	o__Alteromonadales	f__Colwelliaceae	g__Colwellia
d__Bacteria|p__Proteobacteria|c__Gammaproteobacteria|o__Alteromonadales|f__Colwelliaceae|g__Thalassotalea	32	28	27	39	49	51	42	54	41	51	67	52	d__Bacteria	p__Proteobacteria	c__Gammaproteobacteria	o__Alteromonadales	f__Colwelliaceae	g__Thalassotalea
d__Bacteria|p__Proteobacteria|c__Gammaproteobacteria|o__Alteromonadales|f__Moritellaceae|g__Moritella	292	372	449	384	628	460	298	431	456	364	391	284	d__Bacteria	p__Proteobacteria	c__Gammaproteobacteria	o__Alteromonadales	f__Moritellaceae	g__Moritella
d__Bacteria|p__Proteobacteria|c__Gammaproteobacteria|o__Alteromonadales|f__Idiomarinaceae|g__Idiomarina	186	235	212	250	234	217	152	153	194	185	212	217	d__Bacteria	p__Proteobacteria	c__Gammaproteobacteria	o__Alteromonadales	f__Idiomarinaceae	g__Idiomarina
d__Bacteria|p__Proteobacteria|c__Gammaproteobacteria|o__Alteromonadales|f__Idiomarinaceae|s__Idiomarinaceae bacterium HL-53	14	17	20	38	36	41	50	45	57	49	44	32	d__Bacteria	p__Proteobacteria	c__Gammaproteobacteria	o__Alteromonadales	f__Idiomarinaceae	s__Idiomarinaceae bacterium HL-53
d__Bacteria|p__Proteobacteria|c__Gammaproteobacteria|o__Alteromonadales|f__Ferrimonadaceae|g__Ferrimonas	106	119	109	133	140	129	150	136	109	134	137	154	d__Bacteria	p__Proteobacteria	c__Gammaproteobacteria	o__Alteromonadales	f__Ferrimonadaceae	g__Ferrimonas
d__Bacteria|p__Proteobacteria|c__Gammaproteobacteria|o__Pasteurellales|f__Pasteurellaceae|g__Pasteurella	3434	3287	2092	4851	4900	1682	5653	4776	3132	5665	3913	5673	d__Bacteria	p__Proteobacteria	c__Gammaproteobacteria	o__Pasteurellales	f__Pasteurellaceae	g__Pasteurella
d__Bacteria|p__Proteobacteria|c__Gammaproteobacteria|o__Pasteurellales|f__Pasteurellaceae|g__Haemophilus	457	2036	1922	2382	2249	4381	4769	3721	2747	4141	4091	3304	d__Bacteria	p__Proteobacteria	c__Gammaproteobacteria	o__Pasteurellales	f__Pasteurellaceae	g__Haemophilus
d__Bacteria|p__Proteobacteria|c__Gammaproteobacteria|o__Pasteurellales|f__Pasteurellaceae|g__Actinobacillus	269	352	299	382	513	371	533	414	466	532	525	664	d__Bacteria	p__Proteobacteria	c__Gammaproteobacteria	o__Pasteurellales	f__Pasteurellaceae	g__Actinobacillus
d__Bacteria|p__Proteobacteria|c__Gammaproteobacteria|o__Pasteurellales|f__Pasteurellaceae|g__Mannheimia	144	147	119	188	179	137	164	133	105	145	164	209	d__Bacteria	p__Proteobacteria	c__Gammaproteobacteria	o__Pasteurellales	f__Pasteurellaceae	g__Mannheimia
d__Bacteria|p__Proteobacteria|c__Gammaproteobacteria|o__Pasteurellales|f__Pasteurellaceae|g__Aggregatibacter	132	137	109	126	127	117	140	143	123	150	122	168	d__Bacteria	p__Proteobacteria	c__Gammaproteobacteria	o__Pasteurellales	f__Pasteurellaceae	g__Aggregatibacter
d__Bacteria|p__Proteobacteria|c__Gammaproteobacteria|o__Pasteurellales|f__Pasteurellaceae|g__Glaesserella	131	129	109	129	167	120	130	113	107	127	112	117	d__Bacteria	p__Proteobacteria	c__Gammaproteobacteria	o__Pasteurellales	f__Pasteurellaceae	g__Glaesserella
d__Bacteria|p__Proteobacteria|c__Gammaproteobacteria|o__Pasteurellales|f__Pasteurellaceae|g__Bibersteinia	102	82	49	44	78	67	39	49	35	53	54	44	d__Bacteria	p__Proteobacteria	c__Gammaproteobacteria	o__Pasteurellales	f__Pasteurellaceae	g__Bibersteinia
d__Bacteria|p__Proteobacteria|c__Gammaproteobacteria|o__Pasteurellales|f__Pasteurellaceae|g__Basfia	77	131	101	178	238	159	352	215	116	339	155	173	d__Bacteria	p__Proteobacteria	c__Gammaproteobacteria	o__Pasteurellales	f__Pasteurellaceae	g__Basfia
d__Bacteria|p__Proteobacteria|c__Gammaproteobacteria|o__Pasteurellales|f__Pasteurellaceae|g__Gallibacterium	38	63	63	67	108	126	110	118	74	154	118	106	d__Bacteria	p__Proteobacteria	c__Gammaproteobacteria	o__Pasteurellales	f__Pasteurellaceae	g__Gallibacterium
d__Bacteria|p__Proteobacteria|c__Gammaproteobacteria|o__Pasteurellales|f__Pasteurellaceae|g__Histophilus	30	84	93	80	73	83	93	102	62	101	79	90	d__Bacteria	p__Proteobacteria	c__Gammaproteobacteria	o__Pasteurellales	f__Pasteurellaceae	g__Histophilus
d__Bacteria|p__Proteobacteria|c__Gammaproteobacteria|o__Pasteurellales|f__Pasteurellaceae|s__Pasteurellaceae bacterium NI1060	23	17	12	13	22	18	23	21	9	18	20	19	d__Bacteria	p__Proteobacteria	c__Gammaproteobacteria	o__Pasteurellales	f__Pasteurellaceae	s__Pasteurellaceae bacterium NI1060
d__Bacteria|p__Proteobacteria|c__Gammaproteobacteria|o__Chromatiales|f__Ectothiorhodospiraceae|g__Thioalkalivibrio	523	596	523	577	625	552	561	539	483	518	601	594	d__Bacteria	p__Proteobacteria	c__Gammaproteobacteria	o__Chromatiales	f__Ectothiorhodospiraceae	g__Thioalkalivibrio
d__Bacteria|p__Proteobacteria|c__Gammaproteobacteria|o__Chromatiales|f__Ectothiorhodospiraceae|g__Acidihalobacter	463	362	339	380	431	319	452	350	273	395	313	352	d__Bacteria	p__Proteobacteria	c__Gammaproteobacteria	o__Chromatiales	f__Ectothiorhodospiraceae	g__Acidihalobacter
d__Bacteria|p__Proteobacteria|c__Gammaproteobacteria|o__Chromatiales|f__Ectothiorhodospiraceae|g__Halorhodospira	350	361	335	467	328	278	247	206	322	206	317	227	d__Bacteria	p__Proteobacteria	c__Gammaproteobacteria	o__Chromatiales	f__Ectothiorhodospiraceae	g__Halorhodospira
d__Bacteria|p__Proteobacteria|c__Gammaproteobacteria|o__Chromatiales|f__Ectothiorhodospiraceae|g__Spiribacter	127	117	127	125	127	92	87	93	115	81	111	119	d__Bacteria	p__Proteobacteria	c__Gammaproteobacteria	o__Chromatiales	f__Ectothiorhodospiraceae	g__Spiribacter
d__Bacteria|p__Proteobacteria|c__Gammaproteobacteria|o__Chromatiales|f__Ectothiorhodospiraceae|g__Alkalilimnicola	123	131	85	102	116	120	161	116	95	134	100	116	d__Bacteria	p__Proteobacteria	c__Gammaproteobacteria	o__Chromatiales	f__Ectothiorhodospiraceae	g__Alkalilimnicola
d__Bacteria|p__Proteobacteria|c__Gammaproteobacteria|o__Chromatiales|f__Ectothiorhodospiraceae|g__Ectothiorhodospira	94	107	80	123	111	98	110	95	70	106	94	113	d__Bacteria	p__Proteobacteria	c__Gammaproteobacteria	o__Chromatiales	f__Ectothiorhodospiraceae	g__Ectothiorhodospira
d__Bacteria|p__Proteobacteria|c__Gammaproteobacteria|o__Chromatiales|f__Chromatiaceae|s__Chromatiaceae bacterium 2141T.STBD.0c.01a	406	419	384	428	464	248	220	228	233	250	274	231	d__Bacteria	p__Proteobacteria	c__Gammaproteobacteria	o__Chromatiales	f__Chromatiaceae	s__Chromatiaceae bacterium 2141T.STBD.0c.01a
d__Bacteria|p__Proteobacteria|c__Gammaproteobacteria|o__Chromatiales|f__Chromatiaceae|g__Marichromatium	258	344	274	299	272	323	347	238	287	269	239	328	d__Bacteria	p__Proteobacteria	c__Gammaproteobacteria	o__Chromatiales	f__Chromatiaceae	g__Marichromatium
d__Bacteria|p__Proteobacteria|c__Gammaproteobacteria|o__Chromatiales|f__Chromatiaceae|g__Thioflavicoccus	206	263	243	222	221	201	218	175	175	158	176	176	d__Bacteria	p__Proteobacteria	c__Gammaproteobacteria	o__Chromatiales	f__Chromatiaceae	g__Thioflavicoccus
d__Bacteria|p__Proteobacteria|c__Gammaproteobacteria|o__Chromatiales|f__Chromatiaceae|g__Allochromatium	185	206	174	207	203	193	147	150	175	164	160	180	d__Bacteria	p__Proteobacteria	c__Gammaproteobacteria	o__Chromatiales	f__Chromatiaceae	g__Allochromatium
d__Bacteria|p__Proteobacteria|c__Gammaproteobacteria|o__Chromatiales|f__Chromatiaceae|g__Thiocystis	180	215	170	217	188	194	95	139	178	138	191	142	d__Bacteria	p__Proteobacteria	c__Gammaproteobacteria	o__Chromatiales	f__Chromatiaceae	g__Thiocystis
d__Bacteria|p__Proteobacteria|c__Gammaproteobacteria|o__Chromatiales|f__Chromatiaceae|g__Thiodictyon	178	266	217	248	261	255	235	216	227	232	225	264	d__Bacteria	p__Proteobacteria	c__Gammaproteobacteria	o__Chromatiales	f__Chromatiaceae	g__Thiodictyon
d__Bacteria|p__Proteobacteria|c__Gammaproteobacteria|o__Chromatiales|f__Chromatiaceae|g__Nitrosococcus	160	231	191	216	225	185	267	192	188	185	173	201	d__Bacteria	p__Proteobacteria	c__Gammaproteobacteria	o__Chromatiales	f__Chromatiaceae	g__Nitrosococcus
d__Bacteria|p__Proteobacteria|c__Gammaproteobacteria|o__Chromatiales|f__Chromatiaceae|g__Candidatus Nitrosoglobus	44	83	91	144	43	107	30	39	35	46	75	127	d__Bacteria	p__Proteobacteria	c__Gammaproteobacteria	o__Chromatiales	f__Chromatiaceae	g__Candidatus Nitrosoglobus
d__Bacteria|p__Proteobacteria|c__Gammaproteobacteria|o__Chromatiales|f__Halothiobacillaceae|g__Halothiobacillus	204	215	151	179	212	261	258	207	195	244	242	232	d__Bacteria	p__Proteobacteria	c__Gammaproteobacteria	o__Chromatiales	f__Halothiobacillaceae	g__Halothiobacillus
d__Bacteria|p__Proteobacteria|c__Gammaproteobacteria|o__Chromatiales|f__Granulosicoccaceae|g__Granulosicoccus	120	124	112	89	115	256	128	123	101	101	97	105	d__Bacteria	p__Proteobacteria	c__Gammaproteobacteria	o__Chromatiales	f__Granulosicoccaceae	g__Granulosicoccus
d__Bacteria|p__Proteobacteria|c__Gammaproteobacteria|o__Chromatiales|f__Wenzhouxiangellaceae|g__Wenzhouxiangella	113	128	104	93	102	124	115	119	95	119	122	128	d__Bacteria	p__Proteobacteria	c__Gammaproteobacteria	o__Chromatiales	f__Wenzhouxiangellaceae	g__Wenzhouxiangella
d__Bacteria|p__Proteobacteria|c__Gammaproteobacteria|o__Chromatiales|f__Woeseiaceae|g__Woeseia	113	109	97	130	125	139	110	94	99	100	124	60	d__Bacteria	p__Proteobacteria	c__Gammaproteobacteria	o__Chromatiales	f__Woeseiaceae	g__Woeseia
d__Bacteria|p__Proteobacteria|c__Gammaproteobacteria|o__Vibrionales|f__Vibrionaceae|g__Vibrio	2960	3176	2751	3075	3706	3523	3762	3381	2880	3857	3567	4521	d__Bacteria	p__Proteobacteria	c__Gammaproteobacteria	o__Vibrionales	f__Vibrionaceae	g__Vibrio
d__Bacteria|p__Proteobacteria|c__Gammaproteobacteria|o__Vibrionales|f__Vibrionaceae|g__Photobacterium	400	430	427	572	622	563	555	458	452	548	521	600	d__Bacteria	p__Proteobacteria	c__Gammaproteobacteria	o__Vibrionales	f__Vibrionaceae	g__Photobacterium
d__Bacteria|p__Proteobacteria|c__Gammaproteobacteria|o__Vibrionales|f__Vibrionaceae|g__Aliivibrio	188	215	232	282	273	358	258	247	238	303	391	444	d__Bacteria	p__Proteobacteria	c__Gammaproteobacteria	o__Vibrionales	f__Vibrionaceae	g__Aliivibrio
d__Bacteria|p__Proteobacteria|c__Gammaproteobacteria|o__Vibrionales|f__Vibrionaceae|g__Paraphotobacterium	81	78	68	88	115	42	48	40	46	52	67	54	d__Bacteria	p__Proteobacteria	c__Gammaproteobacteria	o__Vibrionales	f__Vibrionaceae	g__Paraphotobacterium
d__Bacteria|p__Proteobacteria|c__Gammaproteobacteria|o__Vibrionales|f__Vibrionaceae|g__Grimontia	52	90	72	99	77	80	84	88	63	91	99	96	d__Bacteria	p__Proteobacteria	c__Gammaproteobacteria	o__Vibrionales	f__Vibrionaceae	g__Grimontia
d__Bacteria|p__Proteobacteria|c__Gammaproteobacteria|o__Vibrionales|f__Vibrionaceae|g__Enterovibrio	29	40	29	54	60	24	21	30	26	20	25	24	d__Bacteria	p__Proteobacteria	c__Gammaproteobacteria	o__Vibrionales	f__Vibrionaceae	g__Enterovibrio
d__Bacteria|p__Proteobacteria|c__Gammaproteobacteria|o__Aeromonadales|f__Aeromonadaceae|g__Aeromonas	2484	3185	2649	3148	3476	3849	4034	3759	3300	4583	3720	3857	d__Bacteria	p__Proteobacteria	c__Gammaproteobacteria	o__Aeromonadales	f__Aeromonadaceae	g__Aeromonas
d__Bacteria|p__Proteobacteria|c__Gammaproteobacteria|o__Aeromonadales|f__Aeromonadaceae|g__Zobellella	202	282	204	223	237	225	265	193	177	213	224	253	d__Bacteria	p__Proteobacteria	c__Gammaproteobacteria	o__Aeromonadales	f__Aeromonadaceae	g__Zobellella
d__Bacteria|p__Proteobacteria|c__Gammaproteobacteria|o__Aeromonadales|f__Aeromonadaceae|g__Oceanimonas	143	169	139	157	167	159	139	129	120	142	114	138	d__Bacteria	p__Proteobacteria	c__Gammaproteobacteria	o__Aeromonadales	f__Aeromonadaceae	g__Oceanimonas
d__Bacteria|p__Proteobacteria|c__Gammaproteobacteria|o__Aeromonadales|f__Aeromonadaceae|g__Tolumonas	141	233	203	265	250	267	219	220	193	266	239	284	d__Bacteria	p__Proteobacteria	c__Gammaproteobacteria	o__Aeromonadales	f__Aeromonadaceae	g__Tolumonas
d__Bacteria|p__Proteobacteria|c__Gammaproteobacteria|o__Aeromonadales|f__Aeromonadaceae|g__Oceanisphaera	61	59	42	53	66	72	112	90	79	84	69	72	d__Bacteria	p__Proteobacteria	c__Gammaproteobacteria	o__Aeromonadales	f__Aeromonadaceae	g__Oceanisphaera
d__Bacteria|p__Proteobacteria|c__Gammaproteobacteria|o__Cellvibrionales|f__Halieaceae|g__Halioglobus	1312	1055	1032	944	1127	1073	1036	1009	976	1164	966	1023	d__Bacteria	p__Proteobacteria	c__Gammaproteobacteria	o__Cellvibrionales	f__Halieaceae	g__Halioglobus
d__Bacteria|p__Proteobacteria|c__Gammaproteobacteria|o__Cellvibrionales|f__Halieaceae|g__Congregibacter	55	50	37	48	50	69	50	54	48	72	80	83	d__Bacteria	p__Proteobacteria	c__Gammaproteobacteria	o__Cellvibrionales	f__Halieaceae	g__Congregibacter
d__Bacteria|p__Proteobacteria|c__Gammaproteobacteria|o__Cellvibrionales|f__Cellvibrionaceae|g__Cellvibrio	276	316	244	378	345	403	454	356	364	445	463	567	d__Bacteria	p__Proteobacteria	c__Gammaproteobacteria	o__Cellvibrionales	f__Cellvibrionaceae	g__Cellvibrio
d__Bacteria|p__Proteobacteria|c__Gammaproteobacteria|o__Cellvibrionales|f__Cellvibrionaceae|g__Saccharophagus	79	136	82	92	101	222	310	266	284	218	169	173	d__Bacteria	p__Proteobacteria	c__Gammaproteobacteria	o__Cellvibrionales	f__Cellvibrionaceae	g__Saccharophagus
d__Bacteria|p__Proteobacteria|c__Gammaproteobacteria|o__Cellvibrionales|f__Cellvibrionaceae|g__Agarilytica	62	45	61	67	80	95	101	74	59	98	94	86	d__Bacteria	p__Proteobacteria	c__Gammaproteobacteria	o__Cellvibrionales	f__Cellvibrionaceae	g__Agarilytica
d__Bacteria|p__Proteobacteria|c__Gammaproteobacteria|o__Cellvibrionales|f__Cellvibrionaceae|g__Teredinibacter	57	54	40	62	47	44	72	59	59	63	50	72	d__Bacteria	p__Proteobacteria	c__Gammaproteobacteria	o__Cellvibrionales	f__Cellvibrionaceae	g__Teredinibacter
d__Bacteria|p__Proteobacteria|c__Gammaproteobacteria|o__Cellvibrionales|f__Cellvibrionaceae|g__Simiduia	56	61	66	67	86	54	59	59	58	76	79	93	d__Bacteria	p__Proteobacteria	c__Gammaproteobacteria	o__Cellvibrionales	f__Cellvibrionaceae	g__Simiduia
d__Bacteria|p__Proteobacteria|c__Gammaproteobacteria|o__Cellvibrionales|f__Microbulbiferaceae|g__Microbulbifer	461	619	547	539	620	551	640	499	478	547	543	559	d__Bacteria	p__Proteobacteria	c__Gammaproteobacteria	o__Cellvibrionales	f__Microbulbiferaceae	g__Microbulbifer
d__Bacteria|p__Proteobacteria|c__Gammaproteobacteria|o__Cellvibrionales|f__Spongiibacteraceae|g__Oceanicoccus	170	202	135	142	206	175	213	263	167	194	191	169	d__Bacteria	p__Proteobacteria	c__Gammaproteobacteria	o__Cellvibrionales	f__Spongiibacteraceae	g__Oceanicoccus
d__Bacteria|p__Proteobacteria|c__Gammaproteobacteria|o__Cellvibrionales|f__Spongiibacteraceae|g__Zhongshania	70	96	80	93	83	79	96	55	74	67	62	93	d__Bacteria	p__Proteobacteria	c__Gammaproteobacteria	o__Cellvibrionales	f__Spongiibacteraceae	g__Zhongshania
d__Bacteria|p__Proteobacteria|c__Gammaproteobacteria|o__Cellvibrionales|f__Spongiibacteraceae|g__Spongiibacter	37	42	37	45	47	54	73	51	42	44	52	57	d__Bacteria	p__Proteobacteria	c__Gammaproteobacteria	o__Cellvibrionales	f__Spongiibacteraceae	g__Spongiibacter
d__Bacteria|p__Proteobacteria|c__Gammaproteobacteria|o__Thiotrichales|f__Francisellaceae|g__Francisella	1446	1542	1340	1525	1857	1906	2256	1741	1358	1994	1735	2067	d__Bacteria	p__Proteobacteria	c__Gammaproteobacteria	o__Thiotrichales	f__Francisellaceae	g__Francisella
d__Bacteria|p__Proteobacteria|c__Gammaproteobacteria|o__Thiotrichales|f__Francisellaceae|g__Allofrancisella	197	273	214	454	450	375	366	422	417	504	533	661	d__Bacteria	p__Proteobacteria	c__Gammaproteobacteria	o__Thiotrichales	f__Francisellaceae	g__Allofrancisella
d__Bacteria|p__Proteobacteria|c__Gammaproteobacteria|o__Thiotrichales|f__Piscirickettsiaceae|g__Methylophaga	145	147	135	135	142	177	196	173	115	148	130	172	d__Bacteria	p__Proteobacteria	c__Gammaproteobacteria	o__Thiotrichales	f__Piscirickettsiaceae	g__Methylophaga
d__Bacteria|p__Proteobacteria|c__Gammaproteobacteria|o__Thiotrichales|f__Piscirickettsiaceae|g__Thiomicrospira	137	134	115	127	120	90	103	97	74	91	109	116	d__Bacteria	p__Proteobacteria	c__Gammaproteobacteria	o__Thiotrichales	f__Piscirickettsiaceae	g__Thiomicrospira
d__Bacteria|p__Proteobacteria|c__Gammaproteobacteria|o__Thiotrichales|f__Piscirickettsiaceae|g__Cycloclasticus	55	31	44	49	60	40	88	56	40	60	47	77	d__Bacteria	p__Proteobacteria	c__Gammaproteobacteria	o__Thiotrichales	f__Piscirickettsiaceae	g__Cycloclasticus
d__Bacteria|p__Proteobacteria|c__Gammaproteobacteria|o__Thiotrichales|f__Piscirickettsiaceae|g__Piscirickettsia	54	80	61	46	62	89	144	109	69	93	76	90	d__Bacteria	p__Proteobacteria	c__Gammaproteobacteria	o__Thiotrichales	f__Piscirickettsiaceae	g__Piscirickettsia
d__Bacteria|p__Proteobacteria|c__Gammaproteobacteria|o__Thiotrichales|f__Piscirickettsiaceae|g__Hydrogenovibrio	15	23	17	27	33	32	33	18	25	24	28	28	d__Bacteria	p__Proteobacteria	c__Gammaproteobacteria	o__Thiotrichales	f__Piscirickettsiaceae	g__Hydrogenovibrio
d__Bacteria|p__Proteobacteria|c__Gammaproteobacteria|o__Thiotrichales|f__Thiotrichaceae|g__Thioploca	51	79	101	90	104	165	323	239	125	197	126	135	d__Bacteria	p__Proteobacteria	c__Gammaproteobacteria	o__Thiotrichales	f__Thiotrichaceae	g__Thioploca
d__Bacteria|p__Proteobacteria|c__Gammaproteobacteria|o__Thiotrichales|f__Thiotrichaceae|g__Beggiatoa	40	60	52	73	70	61	50	40	43	60	72	87	d__Bacteria	p__Proteobacteria	c__Gammaproteobacteria	o__Thiotrichales	f__Thiotrichaceae	g__Beggiatoa
d__Bacteria|p__Proteobacteria|c__Gammaproteobacteria|o__Methylococcales|f__Methylococcaceae|g__Methylomonas	374	427	358	375	431	397	454	385	378	424	418	530	d__Bacteria	p__Proteobacteria	c__Gammaproteobacteria	o__Methylococcales	f__Methylococcaceae	g__Methylomonas
d__Bacteria|p__Proteobacteria|c__Gammaproteobacteria|o__Methylococcales|f__Methylococcaceae|g__Methylomicrobium	319	387	330	429	427	349	296	306	294	258	412	380	d__Bacteria	p__Proteobacteria	c__Gammaproteobacteria	o__Methylococcales	f__Methylococcaceae	g__Methylomicrobium
d__Bacteria|p__Proteobacteria|c__Gammaproteobacteria|o__Methylococcales|f__Methylococcaceae|g__Methylococcus	170	193	142	166	200	143	154	131	128	128	129	175	d__Bacteria	p__Proteobacteria	c__Gammaproteobacteria	o__Methylococcales	f__Methylococcaceae	g__Methylococcus
d__Bacteria|p__Proteobacteria|c__Gammaproteobacteria|o__Methylococcales|f__Methylococcaceae|g__Methylocaldum	136	129	126	145	134	141	135	127	109	139	107	179	d__Bacteria	p__Proteobacteria	c__Gammaproteobacteria	o__Methylococcales	f__Methylococcaceae	g__Methylocaldum
d__Bacteria|p__Proteobacteria|c__Gammaproteobacteria|o__Methylococcales|f__Methylococcaceae|g__Methylovulum	51	76	71	70	87	81	126	110	85	135	108	97	d__Bacteria	p__Proteobacteria	c__Gammaproteobacteria	o__Methylococcales	f__Methylococcaceae	g__Methylovulum
d__Bacteria|p__Proteobacteria|c__Gammaproteobacteria|o__Legionellales|f__Legionellaceae|g__Legionella	553	777	743	818	819	934	923	736	662	794	876	911	d__Bacteria	p__Proteobacteria	c__Gammaproteobacteria	o__Legionellales	f__Legionellaceae	g__Legionella
d__Bacteria|p__Proteobacteria|c__Gammaproteobacteria|o__Legionellales|f__Legionellaceae|g__Tatlockia	41	38	33	66	58	53	42	56	52	52	76	71	d__Bacteria	p__Proteobacteria	c__Gammaproteobacteria	o__Legionellales	f__Legionellaceae	g__Tatlockia
d__Bacteria|p__Proteobacteria|c__Gammaproteobacteria|o__Legionellales|f__Legionellaceae|g__Fluoribacter	28	27	25	32	39	23	20	19	26	25	34	24	d__Bacteria	p__Proteobacteria	c__Gammaproteobacteria	o__Legionellales	f__Legionellaceae	g__Fluoribacter
d__Bacteria|p__Proteobacteria|c__Gammaproteobacteria|o__Legionellales|f__Coxiellaceae|g__Coxiella	25	30	26	37	46	40	36	31	35	33	51	56	d__Bacteria	p__Proteobacteria	c__Gammaproteobacteria	o__Legionellales	f__Coxiellaceae	g__Coxiella
d__Bacteria|p__Proteobacteria|c__Gammaproteobacteria|o__Legionellales|f__Coxiellaceae|s__Coxiella-like endosymbiont	5	8	5	7	1	9	4	7	5	3	7	5	d__Bacteria	p__Proteobacteria	c__Gammaproteobacteria	o__Legionellales	f__Coxiellaceae	s__Coxiella-like endosymbiont
d__Bacteria|p__Proteobacteria|c__Gammaproteobacteria|o__Acidiferrobacterales|f__Acidiferrobacteraceae|g__Sulfurifustis	147	166	114	130	174	156	171	170	135	161	132	213	d__Bacteria	p__Proteobacteria	c__Gammaproteobacteria	o__Acidiferrobacterales	f__Acidiferrobacteraceae	g__Sulfurifustis
d__Bacteria|p__Proteobacteria|c__Gammaproteobacteria|o__Acidiferrobacterales|f__Acidiferrobacteraceae|g__Sulfuricaulis	132	124	111	121	118	130	124	126	120	118	126	139	d__Bacteria	p__Proteobacteria	c__Gammaproteobacteria	o__Acidiferrobacterales	f__Acidiferrobacteraceae	g__Sulfuricaulis
d__Bacteria|p__Proteobacteria|c__Gammaproteobacteria|o__Acidiferrobacterales|f__Acidiferrobacteraceae|g__Acidiferrobacter	49	45	50	58	49	42	47	52	33	42	52	58	d__Bacteria	p__Proteobacteria	c__Gammaproteobacteria	o__Acidiferrobacterales	f__Acidiferrobacteraceae	g__Acidiferrobacter
d__Bacteria|p__Proteobacteria|c__Gammaproteobacteria|o__Nevskiales|f__Sinobacteraceae|g__Solimonas	193	244	190	242	225	230	178	192	202	205	269	317	d__Bacteria	p__Proteobacteria	c__Gammaproteobacteria	o__Nevskiales	f__Sinobacteraceae	g__Solimonas
d__Bacteria|p__Proteobacteria|c__Gammaproteobacteria|o__Nevskiales|f__Sinobacteraceae|g__Steroidobacter	66	83	84	89	75	176	99	60	46	67	86	109	d__Bacteria	p__Proteobacteria	c__Gammaproteobacteria	o__Nevskiales	f__Sinobacteraceae	g__Steroidobacter
d__Bacteria|p__Proteobacteria|c__Gammaproteobacteria|o__Immundisolibacterales|f__Immundisolibacteraceae|g__Immundisolibacter	198	268	230	254	257	267	298	306	202	292	231	338	d__Bacteria	p__Proteobacteria	c__Gammaproteobacteria	o__Immundisolibacterales	f__Immundisolibacteraceae	g__Immundisolibacter
d__Bacteria|p__Proteobacteria|c__Gammaproteobacteria|o__Cardiobacteriales|f__Cardiobacteriaceae|g__Dichelobacter	84	99	80	83	98	132	78	68	75	73	84	80	d__Bacteria	p__Proteobacteria	c__Gammaproteobacteria	o__Cardiobacteriales	f__Cardiobacteriaceae	g__Dichelobacter
d__Bacteria|p__Proteobacteria|c__Gammaproteobacteria|o__Orbales|f__Orbaceae|g__Gilliamella	56	96	92	112	104	120	138	106	107	118	117	148	d__Bacteria	p__Proteobacteria	c__Gammaproteobacteria	o__Orbales	f__Orbaceae	g__Gilliamella
d__Bacteria|p__Proteobacteria|c__Gammaproteobacteria|o__Orbales|f__Orbaceae|g__Frischella	20	24	18	31	24	34	35	28	31	35	38	33	d__Bacteria	p__Proteobacteria	c__Gammaproteobacteria	o__Orbales	f__Orbaceae	g__Frischella
d__Bacteria|p__Proteobacteria|c__Gammaproteobacteria|o__Salinisphaerales|f__Salinisphaeraceae|g__Salinisphaera	68	126	128	105	109	117	160	114	102	129	83	110	d__Bacteria	p__Proteobacteria	c__Gammaproteobacteria	o__Salinisphaerales	f__Salinisphaeraceae	g__Salinisphaera
d__Bacteria|p__Proteobacteria|c__Deltaproteobacteria|o__Desulfovibrionales|f__Desulfovibrionaceae|g__Desulfovibrio	41789	49814	40981	43213	43661	42249	34830	37726	34377	39957	43002	43874	d__Bacteria	p__Proteobacteria	c__Deltaproteobacteria	o__Desulfovibrionales	f__Desulfovibrionaceae	g__Desulfovibrio
d__Bacteria|p__Proteobacteria|c__Deltaproteobacteria|o__Desulfovibrionales|f__Desulfovibrionaceae|g__Pseudodesulfovibrio	3333	4552	3548	3751	3924	3339	3081	2851	3159	3152	3164	3617	d__Bacteria	p__Proteobacteria	c__Deltaproteobacteria	o__Desulfovibrionales	f__Desulfovibrionaceae	g__Pseudodesulfovibrio
d__Bacteria|p__Proteobacteria|c__Deltaproteobacteria|o__Desulfovibrionales|f__Desulfovibrionaceae|g__Lawsonia	200	212	175	143	183	143	233	148	118	189	119	208	d__Bacteria	p__Proteobacteria	c__Deltaproteobacteria	o__Desulfovibrionales	f__Desulfovibrionaceae	g__Lawsonia
d__Bacteria|p__Proteobacteria|c__Deltaproteobacteria|o__Desulfovibrionales|f__Desulfomicrobiaceae|g__Desulfomicrobium	10704	5689	5360	8068	6008	3603	1720	2427	4477	2362	5194	2525	d__Bacteria	p__Proteobacteria	c__Deltaproteobacteria	o__Desulfovibrionales	f__Desulfomicrobiaceae	g__Desulfomicrobium
d__Bacteria|p__Proteobacteria|c__Deltaproteobacteria|o__Desulfovibrionales|f__Desulfohalobiaceae|g__Desulfohalobium	399	486	471	417	495	394	421	373	378	416	397	557	d__Bacteria	p__Proteobacteria	c__Deltaproteobacteria	o__Desulfovibrionales	f__Desulfohalobiaceae	g__Desulfohalobium
d__Bacteria|p__Proteobacteria|c__Deltaproteobacteria|o__Myxococcales|f__Anaeromyxobacteraceae|g__Anaeromyxobacter	4133	4703	4552	3645	4491	3630	3119	3184	2840	3280	2458	2779	d__Bacteria	p__Proteobacteria	c__Deltaproteobacteria	o__Myxococcales	f__Anaeromyxobacteraceae	g__Anaeromyxobacter
d__Bacteria|p__Proteobacteria|c__Deltaproteobacteria|o__Myxococcales|f__Myxococcaceae|g__Myxococcus	1765	2131	1745	2094	1938	1600	1177	1261	1467	1318	1694	1637	d__Bacteria	p__Proteobacteria	c__Deltaproteobacteria	o__Myxococcales	f__Myxococcaceae	g__Myxococcus
d__Bacteria|p__Proteobacteria|c__Deltaproteobacteria|o__Myxococcales|f__Myxococcaceae|g__Corallococcus	365	395	281	259	304	344	442	299	258	291	291	290	d__Bacteria	p__Proteobacteria	c__Deltaproteobacteria	o__Myxococcales	f__Myxococcaceae	g__Corallococcus
d__Bacteria|p__Proteobacteria|c__Deltaproteobacteria|o__Myxococcales|f__Archangiaceae|g__Melittangium	498	449	373	430	497	414	541	411	381	467	479	528	d__Bacteria	p__Proteobacteria	c__Deltaproteobacteria	o__Myxococcales	f__Archangiaceae	g__Melittangium
d__Bacteria|p__Proteobacteria|c__Deltaproteobacteria|o__Myxococcales|f__Archangiaceae|g__Cystobacter	332	340	310	322	357	395	354	412	295	407	360	481	d__Bacteria	p__Proteobacteria	c__Deltaproteobacteria	o__Myxococcales	f__Archangiaceae	g__Cystobacter
d__Bacteria|p__Proteobacteria|c__Deltaproteobacteria|o__Myxococcales|f__Archangiaceae|g__Archangium	244	257	228	249	246	225	213	198	196	199	181	267	d__Bacteria	p__Proteobacteria	c__Deltaproteobacteria	o__Myxococcales	f__Archangiaceae	g__Archangium
d__Bacteria|p__Proteobacteria|c__Deltaproteobacteria|o__Myxococcales|f__Archangiaceae|g__Stigmatella	236	246	218	202	209	213	186	199	177	227	145	183	d__Bacteria	p__Proteobacteria	c__Deltaproteobacteria	o__Myxococcales	f__Archangiaceae	g__Stigmatella
d__Bacteria|p__Proteobacteria|c__Deltaproteobacteria|o__Myxococcales|f__Vulgatibacteraceae|g__Vulgatibacter	455	529	452	353	497	547	462	443	434	445	354	372	d__Bacteria	p__Proteobacteria	c__Deltaproteobacteria	o__Myxococcales	f__Vulgatibacteraceae	g__Vulgatibacter
d__Bacteria|p__Proteobacteria|c__Deltaproteobacteria|o__Myxococcales|f__Sandaracinaceae|g__Sandaracinus	4725	3097	3303	2293	3026	916	271	829	866	573	714	433	d__Bacteria	p__Proteobacteria	c__Deltaproteobacteria	o__Myxococcales	f__Sandaracinaceae	g__Sandaracinus
d__Bacteria|p__Proteobacteria|c__Deltaproteobacteria|o__Myxococcales|f__Polyangiaceae|g__Sorangium	1512	1436	1247	1280	1312	1103	989	962	921	1010	1076	1107	d__Bacteria	p__Proteobacteria	c__Deltaproteobacteria	o__Myxococcales	f__Polyangiaceae	g__Sorangium
d__Bacteria|p__Proteobacteria|c__Deltaproteobacteria|o__Myxococcales|f__Polyangiaceae|g__Chondromyces	365	352	355	389	405	448	390	372	302	356	293	344	d__Bacteria	p__Proteobacteria	c__Deltaproteobacteria	o__Myxococcales	f__Polyangiaceae	g__Chondromyces
d__Bacteria|p__Proteobacteria|c__Deltaproteobacteria|o__Myxococcales|f__Polyangiaceae|g__Pajaroellobacter	22	22	18	22	20	21	22	26	16	24	30	36	d__Bacteria	p__Proteobacteria	c__Deltaproteobacteria	o__Myxococcales	f__Polyangiaceae	g__Pajaroellobacter
d__Bacteria|p__Proteobacteria|c__Deltaproteobacteria|o__Myxococcales|f__Kofleriaceae|g__Haliangium	583	621	499	641	650	500	388	454	508	474	528	518	d__Bacteria	p__Proteobacteria	c__Deltaproteobacteria	o__Myxococcales	f__Kofleriaceae	g__Haliangium
d__Bacteria|p__Proteobacteria|c__Deltaproteobacteria|o__Desulfobacterales|f__Desulfobulbaceae|g__Desulfocapsa	4411	5217	5034	4818	6408	7349	17116	9602	5641	9132	5091	6116	d__Bacteria	p__Proteobacteria	c__Deltaproteobacteria	o__Desulfobacterales	f__Desulfobulbaceae	g__Desulfocapsa
d__Bacteria|p__Proteobacteria|c__Deltaproteobacteria|o__Desulfobacterales|f__Desulfobulbaceae|g__Desulfobulbus	958	901	901	857	978	1082	898	777	672	835	716	889	d__Bacteria	p__Proteobacteria	c__Deltaproteobacteria	o__Desulfobacterales	f__Desulfobulbaceae	g__Desulfobulbus
d__Bacteria|p__Proteobacteria|c__Deltaproteobacteria|o__Desulfobacterales|f__Desulfobulbaceae|g__Desulfotalea	677	3808	1766	1946	2595	3572	13691	6698	3526	5689	4192	3641	d__Bacteria	p__Proteobacteria	c__Deltaproteobacteria	o__Desulfobacterales	f__Desulfobulbaceae	g__Desulfotalea
d__Bacteria|p__Proteobacteria|c__Deltaproteobacteria|o__Desulfobacterales|f__Desulfobulbaceae|g__Desulfurivibrio	419	567	566	692	670	993	338	523	657	443	741	500	d__Bacteria	p__Proteobacteria	c__Deltaproteobacteria	o__Desulfobacterales	f__Desulfobulbaceae	g__Desulfurivibrio
d__Bacteria|p__Proteobacteria|c__Deltaproteobacteria|o__Desulfobacterales|f__Desulfobacteraceae|g__Desulfatibacillum	1326	1935	2043	1881	2146	824	775	710	889	752	715	809	d__Bacteria	p__Proteobacteria	c__Deltaproteobacteria	o__Desulfobacterales	f__Desulfobacteraceae	g__Desulfatibacillum
d__Bacteria|p__Proteobacteria|c__Deltaproteobacteria|o__Desulfobacterales|f__Desulfobacteraceae|g__Desulfococcus	706	851	715	781	860	814	921	733	615	881	769	934	d__Bacteria	p__Proteobacteria	c__Deltaproteobacteria	o__Desulfobacterales	f__Desulfobacteraceae	g__Desulfococcus
d__Bacteria|p__Proteobacteria|c__Deltaproteobacteria|o__Desulfobacterales|f__Desulfobacteraceae|g__Desulfobacter	226	584	552	597	429	666	466	319	276	359	388	400	d__Bacteria	p__Proteobacteria	c__Deltaproteobacteria	o__Desulfobacterales	f__Desulfobacteraceae	g__Desulfobacter
d__Bacteria|p__Proteobacteria|c__Deltaproteobacteria|o__Desulfobacterales|f__Desulfobacteraceae|g__Desulfobacterium	166	217	168	191	180	171	177	152	167	189	221	236	d__Bacteria	p__Proteobacteria	c__Deltaproteobacteria	o__Desulfobacterales	f__Desulfobacteraceae	g__Desulfobacterium
d__Bacteria|p__Proteobacteria|c__Deltaproteobacteria|o__Desulfobacterales|f__Desulfobacteraceae|g__Desulfobacula	124	170	144	131	164	130	106	75	87	76	104	114	d__Bacteria	p__Proteobacteria	c__Deltaproteobacteria	o__Desulfobacterales	f__Desulfobacteraceae	g__Desulfobacula
d__Bacteria|p__Proteobacteria|c__Deltaproteobacteria|o__Desulfuromonadales|f__Geobacteraceae|g__Geobacter	3721	4647	3709	4274	4282	4096	4233	3673	3974	3827	3935	4632	d__Bacteria	p__Proteobacteria	c__Deltaproteobacteria	o__Desulfuromonadales	f__Geobacteraceae	g__Geobacter
d__Bacteria|p__Proteobacteria|c__Deltaproteobacteria|o__Desulfuromonadales|f__Geobacteraceae|g__Geoalkalibacter	274	735	839	1161	607	327	379	278	223	304	301	346	d__Bacteria	p__Proteobacteria	c__Deltaproteobacteria	o__Desulfuromonadales	f__Geobacteraceae	g__Geoalkalibacter
d__Bacteria|p__Proteobacteria|c__Deltaproteobacteria|o__Desulfuromonadales|f__Desulfuromonadaceae|g__Pelobacter	2650	3503	3571	3192	2953	3969	2777	2394	2535	2711	2331	2979	d__Bacteria	p__Proteobacteria	c__Deltaproteobacteria	o__Desulfuromonadales	f__Desulfuromonadaceae	g__Pelobacter
d__Bacteria|p__Proteobacteria|c__Deltaproteobacteria|o__Desulfuromonadales|f__Desulfuromonadaceae|g__Desulfuromonas	920	980	787	852	847	745	753	711	754	757	729	860	d__Bacteria	p__Proteobacteria	c__Deltaproteobacteria	o__Desulfuromonadales	f__Desulfuromonadaceae	g__Desulfuromonas
d__Bacteria|p__Proteobacteria|c__Deltaproteobacteria|o__Syntrophobacterales|f__Syntrophaceae|g__Desulfomonile	536	922	804	1136	752	1309	994	590	596	750	1052	1621	d__Bacteria	p__Proteobacteria	c__Deltaproteobacteria	o__Syntrophobacterales	f__Syntrophaceae	g__Desulfomonile
d__Bacteria|p__Proteobacteria|c__Deltaproteobacteria|o__Syntrophobacterales|f__Syntrophaceae|g__Syntrophus	239	215	185	201	201	188	161	156	139	170	163	184	d__Bacteria	p__Proteobacteria	c__Deltaproteobacteria	o__Syntrophobacterales	f__Syntrophaceae	g__Syntrophus
d__Bacteria|p__Proteobacteria|c__Deltaproteobacteria|o__Syntrophobacterales|f__Syntrophaceae|g__Desulfobacca	82	116	88	119	114	123	148	80	85	107	85	135	d__Bacteria	p__Proteobacteria	c__Deltaproteobacteria	o__Syntrophobacterales	f__Syntrophaceae	g__Desulfobacca
d__Bacteria|p__Proteobacteria|c__Deltaproteobacteria|o__Syntrophobacterales|f__Syntrophobacteraceae|g__Syntrophobacter	271	277	250	284	266	260	240	198	216	218	267	298	d__Bacteria	p__Proteobacteria	c__Deltaproteobacteria	o__Syntrophobacterales	f__Syntrophobacteraceae	g__Syntrophobacter
d__Bacteria|p__Proteobacteria|c__Deltaproteobacteria|o__Desulfarculales|f__Desulfarculaceae|g__Desulfarculus	743	744	745	559	739	775	757	689	627	728	493	625	d__Bacteria	p__Proteobacteria	c__Deltaproteobacteria	o__Desulfarculales	f__Desulfarculaceae	g__Desulfarculus
d__Bacteria|p__Proteobacteria|c__Deltaproteobacteria|o__Bradymonadales|f__Bradymonadaceae|g__Bradymonas	387	374	348	298	349	233	241	214	169	218	199	200	d__Bacteria	p__Proteobacteria	c__Deltaproteobacteria	o__Bradymonadales	f__Bradymonadaceae	g__Bradymonas
d__Bacteria|p__Proteobacteria|c__Deltaproteobacteria|o__Desulfurellales|f__Desulfurellaceae|g__Desulfurella	109	110	78	128	110	93	80	47	67	68	77	79	d__Bacteria	p__Proteobacteria	c__Deltaproteobacteria	o__Desulfurellales	f__Desulfurellaceae	g__Desulfurella
d__Bacteria|p__Proteobacteria|c__Deltaproteobacteria|o__Desulfurellales|f__Desulfurellaceae|g__Hippea	74	69	88	58	70	59	56	38	54	34	76	61	d__Bacteria	p__Proteobacteria	c__Deltaproteobacteria	o__Desulfurellales	f__Desulfurellaceae	g__Hippea
d__Bacteria|p__Proteobacteria|c__Deltaproteobacteria|f__Candidatus Desulfofervidaceae|g__Candidatus Desulfofervidus|s__Candidatus Desulfofervidus auxilii	82	70	57	96	125	38	58	68	44	59	60	67	d__Bacteria	p__Proteobacteria	c__Deltaproteobacteria	f__Candidatus Desulfofervidaceae	g__Candidatus Desulfofervidus	s__Candidatus Desulfofervidus auxilii
d__Bacteria|p__Proteobacteria|c__Epsilonproteobacteria|o__Campylobacterales|f__Campylobacteraceae|g__Campylobacter	1767	1806	1631	2109	2323	2036	2607	2135	1870	2456	2400	2827	d__Bacteria	p__Proteobacteria	c__Epsilonproteobacteria	o__Campylobacterales	f__Campylobacteraceae	g__Campylobacter
d__Bacteria|p__Proteobacteria|c__Epsilonproteobacteria|o__Campylobacterales|f__Campylobacteraceae|g__Malacobacter	278	260	254	337	310	255	283	239	262	268	338	286	d__Bacteria	p__Proteobacteria	c__Epsilonproteobacteria	o__Campylobacterales	f__Campylobacteraceae	g__Malacobacter
d__Bacteria|p__Proteobacteria|c__Epsilonproteobacteria|o__Campylobacterales|f__Campylobacteraceae|s__Arcobacter sp. LPB0137	89	49	49	53	86	63	66	59	54	62	70	68	d__Bacteria	p__Proteobacteria	c__Epsilonproteobacteria	o__Campylobacterales	f__Campylobacteraceae	s__Arcobacter sp. LPB0137
d__Bacteria|p__Proteobacteria|c__Epsilonproteobacteria|o__Campylobacterales|f__Campylobacteraceae|s__Arcobacter sp. L	56	70	47	58	90	30	58	34	32	42	33	48	d__Bacteria	p__Proteobacteria	c__Epsilonproteobacteria	o__Campylobacterales	f__Campylobacteraceae	s__Arcobacter sp. L
d__Bacteria|p__Proteobacteria|c__Epsilonproteobacteria|o__Campylobacterales|f__Campylobacteraceae|g__Pseudoarcobacter	108	98	84	125	116	78	111	72	89	85	93	94	d__Bacteria	p__Proteobacteria	c__Epsilonproteobacteria	o__Campylobacterales	f__Campylobacteraceae	g__Pseudoarcobacter
d__Bacteria|p__Proteobacteria|c__Epsilonproteobacteria|o__Campylobacterales|f__Campylobacteraceae|g__Arcobacter	83	68	94	81	100	51	38	38	56	49	51	77	d__Bacteria	p__Proteobacteria	c__Epsilonproteobacteria	o__Campylobacterales	f__Campylobacteraceae	g__Arcobacter
d__Bacteria|p__Proteobacteria|c__Epsilonproteobacteria|o__Campylobacterales|f__Campylobacteraceae|g__Aliiarcobacter	72	97	86	108	101	111	124	99	94	113	119	109	d__Bacteria	p__Proteobacteria	c__Epsilonproteobacteria	o__Campylobacterales	f__Campylobacteraceae	g__Aliiarcobacter
d__Bacteria|p__Proteobacteria|c__Epsilonproteobacteria|o__Campylobacterales|f__Campylobacteraceae|g__Haloarcobacter	54	80	57	102	117	98	104	115	119	132	102	163	d__Bacteria	p__Proteobacteria	c__Epsilonproteobacteria	o__Campylobacterales	f__Campylobacteraceae	g__Haloarcobacter
d__Bacteria|p__Proteobacteria|c__Epsilonproteobacteria|o__Campylobacterales|f__Campylobacteraceae|g__Sulfurospirillum	500	552	519	550	651	575	785	576	569	624	560	641	d__Bacteria	p__Proteobacteria	c__Epsilonproteobacteria	o__Campylobacterales	f__Campylobacteraceae	g__Sulfurospirillum
d__Bacteria|p__Proteobacteria|c__Epsilonproteobacteria|o__Campylobacterales|f__Helicobacteraceae|g__Helicobacter	1947	1455	1408	1632	1925	1608	1672	1491	1375	1604	1503	1457	d__Bacteria	p__Proteobacteria	c__Epsilonproteobacteria	o__Campylobacterales	f__Helicobacteraceae	g__Helicobacter
d__Bacteria|p__Proteobacteria|c__Epsilonproteobacteria|o__Campylobacterales|f__Helicobacteraceae|g__Sulfurimonas	119	159	103	198	168	171	297	222	246	275	294	303	d__Bacteria	p__Proteobacteria	c__Epsilonproteobacteria	o__Campylobacterales	f__Helicobacteraceae	g__Sulfurimonas
d__Bacteria|p__Proteobacteria|c__Epsilonproteobacteria|o__Campylobacterales|f__Helicobacteraceae|g__Sulfuricurvum	85	97	86	135	156	153	100	109	104	120	106	106	d__Bacteria	p__Proteobacteria	c__Epsilonproteobacteria	o__Campylobacterales	f__Helicobacteraceae	g__Sulfuricurvum
d__Bacteria|p__Proteobacteria|c__Epsilonproteobacteria|o__Campylobacterales|f__Helicobacteraceae|g__Wolinella	58	73	53	44	59	71	81	55	54	40	34	55	d__Bacteria	p__Proteobacteria	c__Epsilonproteobacteria	o__Campylobacterales	f__Helicobacteraceae	g__Wolinella
d__Bacteria|p__Proteobacteria|c__Epsilonproteobacteria|o__Campylobacterales|g__Nitratifractor|s__Nitratifractor salsuginis	72	92	94	96	91	78	79	88	88	83	76	87	d__Bacteria	p__Proteobacteria	c__Epsilonproteobacteria	o__Campylobacterales	g__Nitratifractor	s__Nitratifractor salsuginis
d__Bacteria|p__Proteobacteria|c__Epsilonproteobacteria|o__Nautiliales|f__Nautiliaceae|g__Nautilia	60	70	50	77	101	83	94	49	69	77	84	82	d__Bacteria	p__Proteobacteria	c__Epsilonproteobacteria	o__Nautiliales	f__Nautiliaceae	g__Nautilia
d__Bacteria|p__Proteobacteria|c__Alphaproteobacteria|o__Rhizobiales|f__Rhizobiaceae|g__Rhizobium	3435	3760	2959	3162	3446	3259	3603	2884	2732	3143	2981	3570	d__Bacteria	p__Proteobacteria	c__Alphaproteobacteria	o__Rhizobiales	f__Rhizobiaceae	g__Rhizobium
d__Bacteria|p__Proteobacteria|c__Alphaproteobacteria|o__Rhizobiales|f__Rhizobiaceae|g__Agrobacterium	1687	1750	1398	1625	1753	1648	1686	1435	1357	1492	1502	1873	d__Bacteria	p__Proteobacteria	c__Alphaproteobacteria	o__Rhizobiales	f__Rhizobiaceae	g__Agrobacterium
d__Bacteria|p__Proteobacteria|c__Alphaproteobacteria|o__Rhizobiales|f__Rhizobiaceae|g__Neorhizobium	405	614	470	510	550	499	603	452	427	597	506	686	d__Bacteria	p__Proteobacteria	c__Alphaproteobacteria	o__Rhizobiales	f__Rhizobiaceae	g__Neorhizobium
d__Bacteria|p__Proteobacteria|c__Alphaproteobacteria|o__Rhizobiales|f__Rhizobiaceae|g__Ensifer	1725	2628	2185	4502	3226	4720	4006	2769	2528	2796	6789	6383	d__Bacteria	p__Proteobacteria	c__Alphaproteobacteria	o__Rhizobiales	f__Rhizobiaceae	g__Ensifer
d__Bacteria|p__Proteobacteria|c__Alphaproteobacteria|o__Rhizobiales|f__Rhizobiaceae|g__Sinorhizobium	1094	1401	1211	1352	1453	1319	1416	1122	1154	1401	1240	1718	d__Bacteria	p__Proteobacteria	c__Alphaproteobacteria	o__Rhizobiales	f__Rhizobiaceae	g__Sinorhizobium
d__Bacteria|p__Proteobacteria|c__Alphaproteobacteria|o__Rhizobiales|f__Rhizobiaceae|g__Liberibacter	318	339	384	309	339	578	644	351	278	364	303	366	d__Bacteria	p__Proteobacteria	c__Alphaproteobacteria	o__Rhizobiales	f__Rhizobiaceae	g__Liberibacter
d__Bacteria|p__Proteobacteria|c__Alphaproteobacteria|o__Rhizobiales|f__Rhizobiaceae|g__Shinella	196	246	214	177	236	296	292	303	244	237	220	226	d__Bacteria	p__Proteobacteria	c__Alphaproteobacteria	o__Rhizobiales	f__Rhizobiaceae	g__Shinella
d__Bacteria|p__Proteobacteria|c__Alphaproteobacteria|o__Rhizobiales|f__Bradyrhizobiaceae|g__Bradyrhizobium	4794	5927	4844	4825	5141	6764	5350	4915	4331	4867	4489	8777	d__Bacteria	p__Proteobacteria	c__Alphaproteobacteria	o__Rhizobiales	f__Bradyrhizobiaceae	g__Bradyrhizobium
d__Bacteria|p__Proteobacteria|c__Alphaproteobacteria|o__Rhizobiales|f__Bradyrhizobiaceae|g__Rhodopseudomonas	1027	1279	980	1059	999	1157	1168	937	996	1097	1051	1804	d__Bacteria	p__Proteobacteria	c__Alphaproteobacteria	o__Rhizobiales	f__Bradyrhizobiaceae	g__Rhodopseudomonas
d__Bacteria|p__Proteobacteria|c__Alphaproteobacteria|o__Rhizobiales|f__Bradyrhizobiaceae|g__Bosea	460	530	436	456	522	530	520	468	457	550	505	686	d__Bacteria	p__Proteobacteria	c__Alphaproteobacteria	o__Rhizobiales	f__Bradyrhizobiaceae	g__Bosea
d__Bacteria|p__Proteobacteria|c__Alphaproteobacteria|o__Rhizobiales|f__Bradyrhizobiaceae|g__Nitrobacter	140	157	133	147	173	152	169	145	120	136	176	248	d__Bacteria	p__Proteobacteria	c__Alphaproteobacteria	o__Rhizobiales	f__Bradyrhizobiaceae	g__Nitrobacter
d__Bacteria|p__Proteobacteria|c__Alphaproteobacteria|o__Rhizobiales|f__Bradyrhizobiaceae|g__Variibacter	89	142	96	149	151	128	89	110	119	132	137	145	d__Bacteria	p__Proteobacteria	c__Alphaproteobacteria	o__Rhizobiales	f__Bradyrhizobiaceae	g__Variibacter
d__Bacteria|p__Proteobacteria|c__Alphaproteobacteria|o__Rhizobiales|f__Bradyrhizobiaceae|s__Bradyrhizobiaceae bacterium SG-6C	88	86	79	94	121	117	132	89	101	88	68	126	d__Bacteria	p__Proteobacteria	c__Alphaproteobacteria	o__Rhizobiales	f__Bradyrhizobiaceae	s__Bradyrhizobiaceae bacterium SG-6C
d__Bacteria|p__Proteobacteria|c__Alphaproteobacteria|o__Rhizobiales|f__Bradyrhizobiaceae|g__Afipia	73	73	78	80	78	105	107	74	83	82	75	147	d__Bacteria	p__Proteobacteria	c__Alphaproteobacteria	o__Rhizobiales	f__Bradyrhizobiaceae	g__Afipia
d__Bacteria|p__Proteobacteria|c__Alphaproteobacteria|o__Rhizobiales|f__Bradyrhizobiaceae|g__Oligotropha	71	97	71	65	61	67	59	50	59	56	64	89	d__Bacteria	p__Proteobacteria	c__Alphaproteobacteria	o__Rhizobiales	f__Bradyrhizobiaceae	g__Oligotropha
d__Bacteria|p__Proteobacteria|c__Alphaproteobacteria|o__Rhizobiales|f__Hyphomicrobiaceae|g__Maritalea	3742	1953	2253	1133	1920	1602	1178	1047	730	931	536	628	d__Bacteria	p__Proteobacteria	c__Alphaproteobacteria	o__Rhizobiales	f__Hyphomicrobiaceae	g__Maritalea
d__Bacteria|p__Proteobacteria|c__Alphaproteobacteria|o__Rhizobiales|f__Hyphomicrobiaceae|g__Filomicrobium	1565	2412	2979	2492	3336	442	174	312	1012	195	372	157	d__Bacteria	p__Proteobacteria	c__Alphaproteobacteria	o__Rhizobiales	f__Hyphomicrobiaceae	g__Filomicrobium
d__Bacteria|p__Proteobacteria|c__Alphaproteobacteria|o__Rhizobiales|f__Hyphomicrobiaceae|g__Rhodoplanes	599	447	350	377	401	325	129	232	282	192	265	198	d__Bacteria	p__Proteobacteria	c__Alphaproteobacteria	o__Rhizobiales	f__Hyphomicrobiaceae	g__Rhodoplanes
d__Bacteria|p__Proteobacteria|c__Alphaproteobacteria|o__Rhizobiales|f__Hyphomicrobiaceae|g__Devosia	433	487	407	427	426	438	523	403	375	455	463	586	d__Bacteria	p__Proteobacteria	c__Alphaproteobacteria	o__Rhizobiales	f__Hyphomicrobiaceae	g__Devosia
d__Bacteria|p__Proteobacteria|c__Alphaproteobacteria|o__Rhizobiales|f__Hyphomicrobiaceae|g__Hyphomicrobium	319	287	252	270	310	303	316	284	269	329	277	287	d__Bacteria	p__Proteobacteria	c__Alphaproteobacteria	o__Rhizobiales	f__Hyphomicrobiaceae	g__Hyphomicrobium
d__Bacteria|p__Proteobacteria|c__Alphaproteobacteria|o__Rhizobiales|f__Hyphomicrobiaceae|g__Blastochloris	189	292	223	230	218	218	168	204	184	190	180	274	d__Bacteria	p__Proteobacteria	c__Alphaproteobacteria	o__Rhizobiales	f__Hyphomicrobiaceae	g__Blastochloris
d__Bacteria|p__Proteobacteria|c__Alphaproteobacteria|o__Rhizobiales|f__Hyphomicrobiaceae|g__Pelagibacterium	121	129	119	125	125	140	106	108	113	128	117	149	d__Bacteria	p__Proteobacteria	c__Alphaproteobacteria	o__Rhizobiales	f__Hyphomicrobiaceae	g__Pelagibacterium
d__Bacteria|p__Proteobacteria|c__Alphaproteobacteria|o__Rhizobiales|f__Hyphomicrobiaceae|g__Rhodomicrobium	76	82	50	83	69	83	86	68	70	97	75	91	d__Bacteria	p__Proteobacteria	c__Alphaproteobacteria	o__Rhizobiales	f__Hyphomicrobiaceae	g__Rhodomicrobium
d__Bacteria|p__Proteobacteria|c__Alphaproteobacteria|o__Rhizobiales|f__Phyllobacteriaceae|g__Phyllobacterium	1716	2149	1655	2221	2878	5086	3532	2804	3033	3149	4038	4764	d__Bacteria	p__Proteobacteria	c__Alphaproteobacteria	o__Rhizobiales	f__Phyllobacteriaceae	g__Phyllobacterium
d__Bacteria|p__Proteobacteria|c__Alphaproteobacteria|o__Rhizobiales|f__Phyllobacteriaceae|g__Mesorhizobium	1107	1308	1032	1238	1359	1329	1279	1125	1053	1177	1255	1500	d__Bacteria	p__Proteobacteria	c__Alphaproteobacteria	o__Rhizobiales	f__Phyllobacteriaceae	g__Mesorhizobium
d__Bacteria|p__Proteobacteria|c__Alphaproteobacteria|o__Rhizobiales|f__Phyllobacteriaceae|g__Nitratireductor	222	246	226	253	237	252	255	222	205	273	237	314	d__Bacteria	p__Proteobacteria	c__Alphaproteobacteria	o__Rhizobiales	f__Phyllobacteriaceae	g__Nitratireductor
d__Bacteria|p__Proteobacteria|c__Alphaproteobacteria|o__Rhizobiales|f__Phyllobacteriaceae|g__Hoeflea	214	269	225	202	266	209	160	162	196	197	214	205	d__Bacteria	p__Proteobacteria	c__Alphaproteobacteria	o__Rhizobiales	f__Phyllobacteriaceae	g__Hoeflea
d__Bacteria|p__Proteobacteria|c__Alphaproteobacteria|o__Rhizobiales|f__Phyllobacteriaceae|g__Aminobacter	205	223	229	213	226	223	267	197	216	243	240	282	d__Bacteria	p__Proteobacteria	c__Alphaproteobacteria	o__Rhizobiales	f__Phyllobacteriaceae	g__Aminobacter
d__Bacteria|p__Proteobacteria|c__Alphaproteobacteria|o__Rhizobiales|f__Phyllobacteriaceae|g__Chelativorans	170	182	157	190	176	137	147	120	136	128	143	202	d__Bacteria	p__Proteobacteria	c__Alphaproteobacteria	o__Rhizobiales	f__Phyllobacteriaceae	g__Chelativorans
d__Bacteria|p__Proteobacteria|c__Alphaproteobacteria|o__Rhizobiales|f__Methylobacteriaceae|g__Methylobacterium	1860	2191	1686	1852	1951	1922	2498	2105	1736	2062	2115	2357	d__Bacteria	p__Proteobacteria	c__Alphaproteobacteria	o__Rhizobiales	f__Methylobacteriaceae	g__Methylobacterium
d__Bacteria|p__Proteobacteria|c__Alphaproteobacteria|o__Rhizobiales|f__Methylobacteriaceae|g__Microvirga	1546	1781	1269	1334	1293	1198	1286	905	1128	1028	803	1052	d__Bacteria	p__Proteobacteria	c__Alphaproteobacteria	o__Rhizobiales	f__Methylobacteriaceae	g__Microvirga
d__Bacteria|p__Proteobacteria|c__Alphaproteobacteria|o__Rhizobiales|f__Methylobacteriaceae|g__Methylorubrum	257	333	260	326	331	314	311	321	276	292	272	325	d__Bacteria	p__Proteobacteria	c__Alphaproteobacteria	o__Rhizobiales	f__Methylobacteriaceae	g__Methylorubrum
d__Bacteria|p__Proteobacteria|c__Alphaproteobacteria|o__Rhizobiales|f__Brucellaceae|g__Ochrobactrum	877	986	821	1048	1122	1100	1391	1196	897	1219	1183	1518	d__Bacteria	p__Proteobacteria	c__Alphaproteobacteria	o__Rhizobiales	f__Brucellaceae	g__Ochrobactrum
d__Bacteria|p__Proteobacteria|c__Alphaproteobacteria|o__Rhizobiales|f__Brucellaceae|g__Brucella	667	1012	745	918	1091	1648	1600	1143	1115	1236	1375	1605	d__Bacteria	p__Proteobacteria	c__Alphaproteobacteria	o__Rhizobiales	f__Brucellaceae	g__Brucella
d__Bacteria|p__Proteobacteria|c__Alphaproteobacteria|o__Rhizobiales|f__Bartonellaceae|g__Bartonella	882	955	935	1180	1230	1299	1682	1447	1193	1692	1634	2534	d__Bacteria	p__Proteobacteria	c__Alphaproteobacteria	o__Rhizobiales	f__Bartonellaceae	g__Bartonella
d__Bacteria|p__Proteobacteria|c__Alphaproteobacteria|o__Rhizobiales|f__Aurantimonadaceae|g__Martelella	482	420	366	422	433	373	400	346	348	401	375	505	d__Bacteria	p__Proteobacteria	c__Alphaproteobacteria	o__Rhizobiales	f__Aurantimonadaceae	g__Martelella
d__Bacteria|p__Proteobacteria|c__Alphaproteobacteria|o__Rhizobiales|f__Aurantimonadaceae|g__Aureimonas	322	263	237	218	236	216	105	144	185	130	224	148	d__Bacteria	p__Proteobacteria	c__Alphaproteobacteria	o__Rhizobiales	f__Aurantimonadaceae	g__Aureimonas
d__Bacteria|p__Proteobacteria|c__Alphaproteobacteria|o__Rhizobiales|f__Methylocystaceae|g__Methylosinus	413	368	326	321	400	329	160	360	337	205	304	178	d__Bacteria	p__Proteobacteria	c__Alphaproteobacteria	o__Rhizobiales	f__Methylocystaceae	g__Methylosinus
d__Bacteria|p__Proteobacteria|c__Alphaproteobacteria|o__Rhizobiales|f__Methylocystaceae|g__Methylocystis	137	161	124	135	150	128	143	122	117	129	137	162	d__Bacteria	p__Proteobacteria	c__Alphaproteobacteria	o__Rhizobiales	f__Methylocystaceae	g__Methylocystis
d__Bacteria|p__Proteobacteria|c__Alphaproteobacteria|o__Rhizobiales|f__Xanthobacteraceae|g__Xanthobacter	179	215	185	219	216	221	200	205	226	216	194	230	d__Bacteria	p__Proteobacteria	c__Alphaproteobacteria	o__Rhizobiales	f__Xanthobacteraceae	g__Xanthobacter
d__Bacteria|p__Proteobacteria|c__Alphaproteobacteria|o__Rhizobiales|f__Xanthobacteraceae|g__Starkeya	126	148	127	122	126	118	160	125	123	131	98	191	d__Bacteria	p__Proteobacteria	c__Alphaproteobacteria	o__Rhizobiales	f__Xanthobacteraceae	g__Starkeya
d__Bacteria|p__Proteobacteria|c__Alphaproteobacteria|o__Rhizobiales|f__Xanthobacteraceae|g__Azorhizobium	95	151	130	128	151	136	170	154	128	138	136	174	d__Bacteria	p__Proteobacteria	c__Alphaproteobacteria	o__Rhizobiales	f__Xanthobacteraceae	g__Azorhizobium
d__Bacteria|p__Proteobacteria|c__Alphaproteobacteria|o__Rhizobiales|f__Xanthobacteraceae|g__Pseudolabrys	88	108	73	98	88	81	104	93	101	84	92	116	d__Bacteria	p__Proteobacteria	c__Alphaproteobacteria	o__Rhizobiales	f__Xanthobacteraceae	g__Pseudolabrys
d__Bacteria|p__Proteobacteria|c__Alphaproteobacteria|o__Rhizobiales|g__Hartmannibacter|s__Hartmannibacter diazotrophicus	220	305	246	268	263	201	177	140	167	157	200	239	d__Bacteria	p__Proteobacteria	c__Alphaproteobacteria	o__Rhizobiales	g__Hartmannibacter	s__Hartmannibacter diazotrophicus
d__Bacteria|p__Proteobacteria|c__Alphaproteobacteria|o__Rhizobiales|g__Methyloceanibacter|s__Methyloceanibacter caenitepidi	68	117	56	77	66	58	62	65	48	62	60	77	d__Bacteria	p__Proteobacteria	c__Alphaproteobacteria	o__Rhizobiales	g__Methyloceanibacter	s__Methyloceanibacter caenitepidi
d__Bacteria|p__Proteobacteria|c__Alphaproteobacteria|o__Rhizobiales|g__Methyloceanibacter|s__Methyloceanibacter sp. wino2	48	50	42	50	45	67	50	42	49	45	44	52	d__Bacteria	p__Proteobacteria	c__Alphaproteobacteria	o__Rhizobiales	g__Methyloceanibacter	s__Methyloceanibacter sp. wino2
d__Bacteria|p__Proteobacteria|c__Alphaproteobacteria|o__Rhizobiales|g__Pseudorhodoplanes|s__Pseudorhodoplanes sinuspersici	85	100	85	86	101	81	96	64	78	110	64	88	d__Bacteria	p__Proteobacteria	c__Alphaproteobacteria	o__Rhizobiales	g__Pseudorhodoplanes	s__Pseudorhodoplanes sinuspersici
d__Bacteria|p__Proteobacteria|c__Alphaproteobacteria|o__Rhizobiales|f__Cohaesibacteraceae|g__Cohaesibacter	238	489	438	548	579	271	165	205	318	220	267	198	d__Bacteria	p__Proteobacteria	c__Alphaproteobacteria	o__Rhizobiales	f__Cohaesibacteraceae	g__Cohaesibacter
d__Bacteria|p__Proteobacteria|c__Alphaproteobacteria|o__Rhizobiales|f__Cohaesibacteraceae|g__Breoghania	139	115	97	106	125	92	85	71	82	88	91	99	d__Bacteria	p__Proteobacteria	c__Alphaproteobacteria	o__Rhizobiales	f__Cohaesibacteraceae	g__Breoghania
d__Bacteria|p__Proteobacteria|c__Alphaproteobacteria|o__Rhizobiales|f__Rhodobiaceae|g__Parvibaculum	120	145	101	113	116	97	100	84	102	103	97	105	d__Bacteria	p__Proteobacteria	c__Alphaproteobacteria	o__Rhizobiales	f__Rhodobiaceae	g__Parvibaculum
d__Bacteria|p__Proteobacteria|c__Alphaproteobacteria|o__Rhizobiales|f__Rhodobiaceae|g__Anderseniella	87	96	74	104	123	163	108	144	111	137	229	230	d__Bacteria	p__Proteobacteria	c__Alphaproteobacteria	o__Rhizobiales	f__Rhodobiaceae	g__Anderseniella
d__Bacteria|p__Proteobacteria|c__Alphaproteobacteria|o__Rhizobiales|f__Rhodobiaceae|g__Candidatus Phaeomarinobacter	81	79	81	79	108	91	89	68	60	83	89	97	d__Bacteria	p__Proteobacteria	c__Alphaproteobacteria	o__Rhizobiales	f__Rhodobiaceae	g__Candidatus Phaeomarinobacter
d__Bacteria|p__Proteobacteria|c__Alphaproteobacteria|o__Rhizobiales|f__Rhodobiaceae|s__Rhodobiaceae bacterium	62	136	114	107	99	140	103	91	89	98	85	94	d__Bacteria	p__Proteobacteria	c__Alphaproteobacteria	o__Rhizobiales	f__Rhodobiaceae	s__Rhodobiaceae bacterium
d__Bacteria|p__Proteobacteria|c__Alphaproteobacteria|o__Rhizobiales|f__Chelatococcaceae|g__Chelatococcus	257	277	251	233	234	232	220	189	172	217	213	276	d__Bacteria	p__Proteobacteria	c__Alphaproteobacteria	o__Rhizobiales	f__Chelatococcaceae	g__Chelatococcus
d__Bacteria|p__Proteobacteria|c__Alphaproteobacteria|o__Rhizobiales|f__Beijerinckiaceae|g__Beijerinckia	101	135	106	108	136	133	150	118	93	143	100	137	d__Bacteria	p__Proteobacteria	c__Alphaproteobacteria	o__Rhizobiales	f__Beijerinckiaceae	g__Beijerinckia
d__Bacteria|p__Proteobacteria|c__Alphaproteobacteria|o__Rhizobiales|f__Beijerinckiaceae|g__Methylocella	63	93	103	58	60	211	153	80	62	95	71	121	d__Bacteria	p__Proteobacteria	c__Alphaproteobacteria	o__Rhizobiales	f__Beijerinckiaceae	g__Methylocella
d__Bacteria|p__Proteobacteria|c__Alphaproteobacteria|o__Rhodobacterales|f__Rhodobacteraceae|g__Paracoccus	1187	1407	1146	1132	1294	1278	1318	1152	1012	1350	1207	1611	d__Bacteria	p__Proteobacteria	c__Alphaproteobacteria	o__Rhodobacterales	f__Rhodobacteraceae	g__Paracoccus
d__Bacteria|p__Proteobacteria|c__Alphaproteobacteria|o__Rhodobacterales|f__Rhodobacteraceae|g__Rhodobacter	756	937	768	828	928	869	1015	788	755	783	726	849	d__Bacteria	p__Proteobacteria	c__Alphaproteobacteria	o__Rhodobacterales	f__Rhodobacteraceae	g__Rhodobacter
d__Bacteria|p__Proteobacteria|c__Alphaproteobacteria|o__Rhodobacterales|f__Rhodobacteraceae|g__Ruegeria	714	1864	1936	2616	1190	1238	581	567	550	622	957	1570	d__Bacteria	p__Proteobacteria	c__Alphaproteobacteria	o__Rhodobacterales	f__Rhodobacteraceae	g__Ruegeria
d__Bacteria|p__Proteobacteria|c__Alphaproteobacteria|o__Rhodobacterales|f__Rhodobacteraceae|g__Sulfitobacter	636	756	557	695	659	618	587	471	516	565	588	684	d__Bacteria	p__Proteobacteria	c__Alphaproteobacteria	o__Rhodobacterales	f__Rhodobacteraceae	g__Sulfitobacter
d__Bacteria|p__Proteobacteria|c__Alphaproteobacteria|o__Rhodobacterales|f__Rhodobacteraceae|g__Yoonia	607	448	370	472	418	53	60	62	112	49	92	56	d__Bacteria	p__Proteobacteria	c__Alphaproteobacteria	o__Rhodobacterales	f__Rhodobacteraceae	g__Yoonia
d__Bacteria|p__Proteobacteria|c__Alphaproteobacteria|o__Rhodobacterales|f__Rhodobacteraceae|g__Labrenzia	494	550	407	506	512	478	678	499	441	598	512	672	d__Bacteria	p__Proteobacteria	c__Alphaproteobacteria	o__Rhodobacterales	f__Rhodobacteraceae	g__Labrenzia
d__Bacteria|p__Proteobacteria|c__Alphaproteobacteria|o__Rhodobacterales|f__Rhodobacteraceae|g__Phaeobacter	411	495	398	469	431	471	547	398	412	486	488	596	d__Bacteria	p__Proteobacteria	c__Alphaproteobacteria	o__Rhodobacterales	f__Rhodobacteraceae	g__Phaeobacter
d__Bacteria|p__Proteobacteria|c__Alphaproteobacteria|o__Rhodobacterales|f__Rhodobacteraceae|g__Octadecabacter	405	381	304	322	403	261	266	253	272	299	292	329	d__Bacteria	p__Proteobacteria	c__Alphaproteobacteria	o__Rhodobacterales	f__Rhodobacteraceae	g__Octadecabacter
d__Bacteria|p__Proteobacteria|c__Alphaproteobacteria|o__Rhodobacterales|f__Rhodobacteraceae|g__Celeribacter	308	389	331	370	401	412	380	315	323	397	405	429	d__Bacteria	p__Proteobacteria	c__Alphaproteobacteria	o__Rhodobacterales	f__Rhodobacteraceae	g__Celeribacter
d__Bacteria|p__Proteobacteria|c__Alphaproteobacteria|o__Rhodobacterales|f__Rhodobacteraceae|s__Rhodobacteraceae bacterium QY30	194	192	168	272	225	266	273	242	206	317	334	586	d__Bacteria	p__Proteobacteria	c__Alphaproteobacteria	o__Rhodobacterales	f__Rhodobacteraceae	s__Rhodobacteraceae bacterium QY30
d__Bacteria|p__Proteobacteria|c__Alphaproteobacteria|o__Rhodobacterales|f__Rhodobacteraceae|s__Rhodobacteraceae bacterium BAR1	65	75	64	64	77	55	71	71	55	59	50	67	d__Bacteria	p__Proteobacteria	c__Alphaproteobacteria	o__Rhodobacterales	f__Rhodobacteraceae	s__Rhodobacteraceae bacterium BAR1
d__Bacteria|p__Proteobacteria|c__Alphaproteobacteria|o__Rhodobacterales|f__Rhodobacteraceae|s__Rhodobacteraceae bacterium	35	35	33	45	43	60	55	43	44	58	87	96	d__Bacteria	p__Proteobacteria	c__Alphaproteobacteria	o__Rhodobacterales	f__Rhodobacteraceae	s__Rhodobacteraceae bacterium
d__Bacteria|p__Proteobacteria|c__Alphaproteobacteria|o__Rhodobacterales|f__Rhodobacteraceae|g__Rhodovulum	284	331	275	315	359	215	249	236	203	202	233	295	d__Bacteria	p__Proteobacteria	c__Alphaproteobacteria	o__Rhodobacterales	f__Rhodobacteraceae	g__Rhodovulum
d__Bacteria|p__Proteobacteria|c__Alphaproteobacteria|o__Rhodobacterales|f__Rhodobacteraceae|g__Yangia	216	270	240	260	272	244	292	235	215	277	238	374	d__Bacteria	p__Proteobacteria	c__Alphaproteobacteria	o__Rhodobacterales	f__Rhodobacteraceae	g__Yangia
d__Bacteria|p__Proteobacteria|c__Alphaproteobacteria|o__Rhodobacterales|f__Rhodobacteraceae|g__Pelagibaca	215	200	176	193	201	174	186	153	182	171	158	218	d__Bacteria	p__Proteobacteria	c__Alphaproteobacteria	o__Rhodobacterales	f__Rhodobacteraceae	g__Pelagibaca
d__Bacteria|p__Proteobacteria|c__Alphaproteobacteria|o__Rhodobacterales|f__Rhodobacteraceae|g__Antarctobacter	210	171	137	160	178	116	129	102	122	97	127	128	d__Bacteria	p__Proteobacteria	c__Alphaproteobacteria	o__Rhodobacterales	f__Rhodobacteraceae	g__Antarctobacter
d__Bacteria|p__Proteobacteria|c__Alphaproteobacteria|o__Rhodobacterales|f__Rhodobacteraceae|g__Defluviimonas	199	159	130	163	172	95	86	78	92	84	94	78	d__Bacteria	p__Proteobacteria	c__Alphaproteobacteria	o__Rhodobacterales	f__Rhodobacteraceae	g__Defluviimonas
d__Bacteria|p__Proteobacteria|c__Alphaproteobacteria|o__Rhodobacterales|f__Rhodobacteraceae|g__Pannonibacter	194	230	171	200	176	188	167	177	153	182	165	193	d__Bacteria	p__Proteobacteria	c__Alphaproteobacteria	o__Rhodobacterales	f__Rhodobacteraceae	g__Pannonibacter
d__Bacteria|p__Proteobacteria|c__Alphaproteobacteria|o__Rhodobacterales|f__Rhodobacteraceae|g__Tateyamaria	190	100	102	107	119	100	54	48	109	50	143	47	d__Bacteria	p__Proteobacteria	c__Alphaproteobacteria	o__Rhodobacterales	f__Rhodobacteraceae	g__Tateyamaria
d__Bacteria|p__Proteobacteria|c__Alphaproteobacteria|o__Rhodobacterales|f__Rhodobacteraceae|g__Pseudovibrio	184	207	172	246	211	210	275	199	142	218	173	235	d__Bacteria	p__Proteobacteria	c__Alphaproteobacteria	o__Rhodobacterales	f__Rhodobacteraceae	g__Pseudovibrio
d__Bacteria|p__Proteobacteria|c__Alphaproteobacteria|o__Rhodobacterales|f__Rhodobacteraceae|g__Leisingera	166	131	132	148	151	140	63	116	135	62	125	53	d__Bacteria	p__Proteobacteria	c__Alphaproteobacteria	o__Rhodobacterales	f__Rhodobacteraceae	g__Leisingera
d__Bacteria|p__Proteobacteria|c__Alphaproteobacteria|o__Rhodobacterales|f__Rhodobacteraceae|g__Marinovum	145	178	127	131	147	145	138	128	110	125	137	125	d__Bacteria	p__Proteobacteria	c__Alphaproteobacteria	o__Rhodobacterales	f__Rhodobacteraceae	g__Marinovum
d__Bacteria|p__Proteobacteria|c__Alphaproteobacteria|o__Rhodobacterales|f__Rhodobacteraceae|g__Rhodobaca	142	102	93	132	117	53	46	60	58	63	74	100	d__Bacteria	p__Proteobacteria	c__Alphaproteobacteria	o__Rhodobacterales	f__Rhodobacteraceae	g__Rhodobaca
d__Bacteria|p__Proteobacteria|c__Alphaproteobacteria|o__Rhodobacterales|f__Rhodobacteraceae|g__Sagittula	140	198	117	157	192	148	128	112	137	148	170	174	d__Bacteria	p__Proteobacteria	c__Alphaproteobacteria	o__Rhodobacterales	f__Rhodobacteraceae	g__Sagittula
d__Bacteria|p__Proteobacteria|c__Alphaproteobacteria|o__Rhodobacterales|f__Rhodobacteraceae|g__Ketogulonicigenium	128	140	105	149	134	117	102	103	97	133	120	157	d__Bacteria	p__Proteobacteria	c__Alphaproteobacteria	o__Rhodobacterales	f__Rhodobacteraceae	g__Ketogulonicigenium
d__Bacteria|p__Proteobacteria|c__Alphaproteobacteria|o__Rhodobacterales|f__Rhodobacteraceae|g__Salipiger	126	152	111	115	140	126	142	107	129	129	126	143	d__Bacteria	p__Proteobacteria	c__Alphaproteobacteria	o__Rhodobacterales	f__Rhodobacteraceae	g__Salipiger
d__Bacteria|p__Proteobacteria|c__Alphaproteobacteria|o__Rhodobacterales|f__Rhodobacteraceae|g__Brevirhabdus	116	153	92	111	122	111	113	127	123	137	134	127	d__Bacteria	p__Proteobacteria	c__Alphaproteobacteria	o__Rhodobacterales	f__Rhodobacteraceae	g__Brevirhabdus
d__Bacteria|p__Proteobacteria|c__Alphaproteobacteria|o__Rhodobacterales|f__Rhodobacteraceae|g__Roseobacter	108	145	136	195	163	347	178	288	271	221	303	290	d__Bacteria	p__Proteobacteria	c__Alphaproteobacteria	o__Rhodobacterales	f__Rhodobacteraceae	g__Roseobacter
d__Bacteria|p__Proteobacteria|c__Alphaproteobacteria|o__Rhodobacterales|f__Rhodobacteraceae|g__Gemmobacter	104	124	96	94	109	85	95	80	67	76	73	115	d__Bacteria	p__Proteobacteria	c__Alphaproteobacteria	o__Rhodobacterales	f__Rhodobacteraceae	g__Gemmobacter
d__Bacteria|p__Proteobacteria|c__Alphaproteobacteria|o__Rhodobacterales|f__Rhodobacteraceae|g__Thalassococcus	99	119	82	105	114	80	94	90	83	82	77	78	d__Bacteria	p__Proteobacteria	c__Alphaproteobacteria	o__Rhodobacterales	f__Rhodobacteraceae	g__Thalassococcus
d__Bacteria|p__Proteobacteria|c__Alphaproteobacteria|o__Rhodobacterales|f__Rhodobacteraceae|g__Marivivens	92	136	106	148	134	105	176	95	99	151	138	288	d__Bacteria	p__Proteobacteria	c__Alphaproteobacteria	o__Rhodobacterales	f__Rhodobacteraceae	g__Marivivens
d__Bacteria|p__Proteobacteria|c__Alphaproteobacteria|o__Rhodobacterales|f__Rhodobacteraceae|g__Stappia	90	113	84	93	117	100	112	79	97	91	118	110	d__Bacteria	p__Proteobacteria	c__Alphaproteobacteria	o__Rhodobacterales	f__Rhodobacteraceae	g__Stappia
d__Bacteria|p__Proteobacteria|c__Alphaproteobacteria|o__Rhodobacterales|f__Rhodobacteraceae|g__Epibacterium	70	59	72	92	74	75	90	57	62	89	58	70	d__Bacteria	p__Proteobacteria	c__Alphaproteobacteria	o__Rhodobacterales	f__Rhodobacteraceae	g__Epibacterium
d__Bacteria|p__Proteobacteria|c__Alphaproteobacteria|o__Rhodobacterales|f__Rhodobacteraceae|g__Confluentimicrobium	65	90	83	79	101	75	78	78	63	72	71	84	d__Bacteria	p__Proteobacteria	c__Alphaproteobacteria	o__Rhodobacterales	f__Rhodobacteraceae	g__Confluentimicrobium
d__Bacteria|p__Proteobacteria|c__Alphaproteobacteria|o__Rhodobacterales|f__Rhodobacteraceae|g__Roseovarius	60	66	55	86	69	83	103	89	86	127	99	118	d__Bacteria	p__Proteobacteria	c__Alphaproteobacteria	o__Rhodobacterales	f__Rhodobacteraceae	g__Roseovarius
d__Bacteria|p__Proteobacteria|c__Alphaproteobacteria|o__Rhodobacterales|f__Rhodobacteraceae|g__Thioclava	57	75	52	65	57	46	52	49	65	45	65	100	d__Bacteria	p__Proteobacteria	c__Alphaproteobacteria	o__Rhodobacterales	f__Rhodobacteraceae	g__Thioclava
d__Bacteria|p__Proteobacteria|c__Alphaproteobacteria|o__Rhodobacterales|f__Rhodobacteraceae|g__Dinoroseobacter	52	48	34	50	51	46	60	41	48	73	45	83	d__Bacteria	p__Proteobacteria	c__Alphaproteobacteria	o__Rhodobacterales	f__Rhodobacteraceae	g__Dinoroseobacter
d__Bacteria|p__Proteobacteria|c__Alphaproteobacteria|o__Rhodobacterales|f__Rhodobacteraceae|g__Jannaschia	52	52	39	40	63	54	53	46	39	50	49	58	d__Bacteria	p__Proteobacteria	c__Alphaproteobacteria	o__Rhodobacterales	f__Rhodobacteraceae	g__Jannaschia
d__Bacteria|p__Proteobacteria|c__Alphaproteobacteria|o__Rhodobacterales|f__Rhodobacteraceae|g__Roseibacterium	44	60	55	57	60	59	72	57	57	54	62	58	d__Bacteria	p__Proteobacteria	c__Alphaproteobacteria	o__Rhodobacterales	f__Rhodobacteraceae	g__Roseibacterium
d__Bacteria|p__Proteobacteria|c__Alphaproteobacteria|o__Rhodobacterales|f__Rhodobacteraceae|g__Halocynthiibacter	16	30	22	44	36	37	50	37	30	58	42	38	d__Bacteria	p__Proteobacteria	c__Alphaproteobacteria	o__Rhodobacterales	f__Rhodobacteraceae	g__Halocynthiibacter
d__Bacteria|p__Proteobacteria|c__Alphaproteobacteria|o__Rhodobacterales|f__Hyphomonadaceae|g__Hirschia	1804	1687	1416	1372	1594	1874	2608	1661	1165	1667	951	1297	d__Bacteria	p__Proteobacteria	c__Alphaproteobacteria	o__Rhodobacterales	f__Hyphomonadaceae	g__Hirschia
d__Bacteria|p__Proteobacteria|c__Alphaproteobacteria|o__Rhodobacterales|f__Hyphomonadaceae|g__Hyphomonas	258	266	250	288	230	264	249	205	191	263	214	349	d__Bacteria	p__Proteobacteria	c__Alphaproteobacteria	o__Rhodobacterales	f__Hyphomonadaceae	g__Hyphomonas
d__Bacteria|p__Proteobacteria|c__Alphaproteobacteria|o__Rhodobacterales|f__Hyphomonadaceae|g__Maricaulis	60	80	76	108	65	92	71	57	42	67	83	117	d__Bacteria	p__Proteobacteria	c__Alphaproteobacteria	o__Rhodobacterales	f__Hyphomonadaceae	g__Maricaulis
d__Bacteria|p__Proteobacteria|c__Alphaproteobacteria|o__Sphingomonadales|f__Sphingomonadaceae|g__Sphingomonas	2529	2853	2314	2603	2610	2313	2390	2086	2045	2301	2214	2596	d__Bacteria	p__Proteobacteria	c__Alphaproteobacteria	o__Sphingomonadales	f__Sphingomonadaceae	g__Sphingomonas
d__Bacteria|p__Proteobacteria|c__Alphaproteobacteria|o__Sphingomonadales|f__Sphingomonadaceae|g__Blastomonas	2037	1361	1419	1536	1981	2575	2152	1568	1029	976	1244	571	d__Bacteria	p__Proteobacteria	c__Alphaproteobacteria	o__Sphingomonadales	f__Sphingomonadaceae	g__Blastomonas
d__Bacteria|p__Proteobacteria|c__Alphaproteobacteria|o__Sphingomonadales|f__Sphingomonadaceae|g__Sphingobium	2019	2145	1691	2203	2116	1702	1513	1411	1656	1534	1924	1955	d__Bacteria	p__Proteobacteria	c__Alphaproteobacteria	o__Sphingomonadales	f__Sphingomonadaceae	g__Sphingobium
d__Bacteria|p__Proteobacteria|c__Alphaproteobacteria|o__Sphingomonadales|f__Sphingomonadaceae|g__Sphingopyxis	762	811	730	873	906	781	774	698	766	795	723	906	d__Bacteria	p__Proteobacteria	c__Alphaproteobacteria	o__Sphingomonadales	f__Sphingomonadaceae	g__Sphingopyxis
d__Bacteria|p__Proteobacteria|c__Alphaproteobacteria|o__Sphingomonadales|f__Sphingomonadaceae|g__Novosphingobium	512	536	456	532	571	509	540	444	460	539	631	656	d__Bacteria	p__Proteobacteria	c__Alphaproteobacteria	o__Sphingomonadales	f__Sphingomonadaceae	g__Novosphingobium
d__Bacteria|p__Proteobacteria|c__Alphaproteobacteria|o__Sphingomonadales|f__Sphingomonadaceae|g__Sphingorhabdus	246	257	215	277	285	237	230	211	263	202	279	250	d__Bacteria	p__Proteobacteria	c__Alphaproteobacteria	o__Sphingomonadales	f__Sphingomonadaceae	g__Sphingorhabdus
d__Bacteria|p__Proteobacteria|c__Alphaproteobacteria|o__Sphingomonadales|f__Sphingomonadaceae|g__Zymomonas	121	134	116	172	167	167	228	172	152	197	193	199	d__Bacteria	p__Proteobacteria	c__Alphaproteobacteria	o__Sphingomonadales	f__Sphingomonadaceae	g__Zymomonas
d__Bacteria|p__Proteobacteria|c__Alphaproteobacteria|o__Sphingomonadales|f__Sphingomonadaceae|g__Rhizorhabdus	81	86	62	87	80	79	82	60	66	58	84	76	d__Bacteria	p__Proteobacteria	c__Alphaproteobacteria	o__Sphingomonadales	f__Sphingomonadaceae	g__Rhizorhabdus
d__Bacteria|p__Proteobacteria|c__Alphaproteobacteria|o__Sphingomonadales|f__Sphingomonadaceae|g__Citromicrobium	71	128	100	109	106	111	170	108	96	150	126	164	d__Bacteria	p__Proteobacteria	c__Alphaproteobacteria	o__Sphingomonadales	f__Sphingomonadaceae	g__Citromicrobium
d__Bacteria|p__Proteobacteria|c__Alphaproteobacteria|o__Sphingomonadales|f__Erythrobacteraceae|g__Erythrobacter	1169	903	810	914	916	814	866	729	737	748	678	943	d__Bacteria	p__Proteobacteria	c__Alphaproteobacteria	o__Sphingomonadales	f__Erythrobacteraceae	g__Erythrobacter
d__Bacteria|p__Proteobacteria|c__Alphaproteobacteria|o__Sphingomonadales|f__Erythrobacteraceae|g__Altererythrobacter	751	781	654	648	685	659	574	530	548	578	571	636	d__Bacteria	p__Proteobacteria	c__Alphaproteobacteria	o__Sphingomonadales	f__Erythrobacteraceae	g__Altererythrobacter
d__Bacteria|p__Proteobacteria|c__Alphaproteobacteria|o__Sphingomonadales|f__Erythrobacteraceae|g__Porphyrobacter	165	168	168	171	188	169	155	145	149	151	180	201	d__Bacteria	p__Proteobacteria	c__Alphaproteobacteria	o__Sphingomonadales	f__Erythrobacteraceae	g__Porphyrobacter
d__Bacteria|p__Proteobacteria|c__Alphaproteobacteria|o__Sphingomonadales|f__Erythrobacteraceae|g__Croceicoccus	115	128	102	116	135	122	96	133	92	113	117	125	d__Bacteria	p__Proteobacteria	c__Alphaproteobacteria	o__Sphingomonadales	f__Erythrobacteraceae	g__Croceicoccus
d__Bacteria|p__Proteobacteria|c__Alphaproteobacteria|o__Rhodospirillales|f__Rhodospirillaceae|g__Azospirillum	2090	2663	2001	2137	2383	2116	2516	1912	2012	2356	1953	2638	d__Bacteria	p__Proteobacteria	c__Alphaproteobacteria	o__Rhodospirillales	f__Rhodospirillaceae	g__Azospirillum
d__Bacteria|p__Proteobacteria|c__Alphaproteobacteria|o__Rhodospirillales|f__Rhodospirillaceae|g__Magnetospirillum	754	794	660	773	746	732	720	703	588	688	668	766	d__Bacteria	p__Proteobacteria	c__Alphaproteobacteria	o__Rhodospirillales	f__Rhodospirillaceae	g__Magnetospirillum
d__Bacteria|p__Proteobacteria|c__Alphaproteobacteria|o__Rhodospirillales|f__Rhodospirillaceae|g__Magnetospira	371	342	252	273	300	292	338	289	234	335	240	368	d__Bacteria	p__Proteobacteria	c__Alphaproteobacteria	o__Rhodospirillales	f__Rhodospirillaceae	g__Magnetospira
d__Bacteria|p__Proteobacteria|c__Alphaproteobacteria|o__Rhodospirillales|f__Rhodospirillaceae|g__Pararhodospirillum	363	413	320	370	326	318	231	203	238	245	284	253	d__Bacteria	p__Proteobacteria	c__Alphaproteobacteria	o__Rhodospirillales	f__Rhodospirillaceae	g__Pararhodospirillum
d__Bacteria|p__Proteobacteria|c__Alphaproteobacteria|o__Rhodospirillales|f__Rhodospirillaceae|g__Thalassospira	361	465	385	418	432	391	444	425	400	421	424	630	d__Bacteria	p__Proteobacteria	c__Alphaproteobacteria	o__Rhodospirillales	f__Rhodospirillaceae	g__Thalassospira
d__Bacteria|p__Proteobacteria|c__Alphaproteobacteria|o__Rhodospirillales|f__Rhodospirillaceae|g__Rhodospirillum	341	426	346	395	396	402	282	313	280	274	307	290	d__Bacteria	p__Proteobacteria	c__Alphaproteobacteria	o__Rhodospirillales	f__Rhodospirillaceae	g__Rhodospirillum
d__Bacteria|p__Proteobacteria|c__Alphaproteobacteria|o__Rhodospirillales|f__Rhodospirillaceae|g__Nitrospirillum	227	232	219	191	241	286	240	293	228	245	242	300	d__Bacteria	p__Proteobacteria	c__Alphaproteobacteria	o__Rhodospirillales	f__Rhodospirillaceae	g__Nitrospirillum
d__Bacteria|p__Proteobacteria|c__Alphaproteobacteria|o__Rhodospirillales|f__Rhodospirillaceae|g__Haematospirillum	186	204	149	169	197	178	153	162	150	207	149	190	d__Bacteria	p__Proteobacteria	c__Alphaproteobacteria	o__Rhodospirillales	f__Rhodospirillaceae	g__Haematospirillum
d__Bacteria|p__Proteobacteria|c__Alphaproteobacteria|o__Rhodospirillales|f__Rhodospirillaceae|s__Rhodospirillaceae bacterium SCSIO 08040	143	165	120	139	162	112	107	87	121	122	110	115	d__Bacteria	p__Proteobacteria	c__Alphaproteobacteria	o__Rhodospirillales	f__Rhodospirillaceae	s__Rhodospirillaceae bacterium SCSIO 08040
d__Bacteria|p__Proteobacteria|c__Alphaproteobacteria|o__Rhodospirillales|f__Rhodospirillaceae|g__Tistrella	129	154	136	144	148	175	170	168	130	165	129	185	d__Bacteria	p__Proteobacteria	c__Alphaproteobacteria	o__Rhodospirillales	f__Rhodospirillaceae	g__Tistrella
d__Bacteria|p__Proteobacteria|c__Alphaproteobacteria|o__Rhodospirillales|f__Rhodospirillaceae|g__Niveispirillum	122	125	103	104	93	109	107	86	111	99	117	113	d__Bacteria	p__Proteobacteria	c__Alphaproteobacteria	o__Rhodospirillales	f__Rhodospirillaceae	g__Niveispirillum
d__Bacteria|p__Proteobacteria|c__Alphaproteobacteria|o__Rhodospirillales|f__Rhodospirillaceae|g__Candidatus Endolissoclinum	37	41	33	31	52	67	45	34	30	54	44	68	d__Bacteria	p__Proteobacteria	c__Alphaproteobacteria	o__Rhodospirillales	f__Rhodospirillaceae	g__Candidatus Endolissoclinum
d__Bacteria|p__Proteobacteria|c__Alphaproteobacteria|o__Rhodospirillales|f__Acetobacteraceae|g__Acetobacter	627	664	532	722	730	608	729	609	567	734	633	791	d__Bacteria	p__Proteobacteria	c__Alphaproteobacteria	o__Rhodospirillales	f__Acetobacteraceae	g__Acetobacter
d__Bacteria|p__Proteobacteria|c__Alphaproteobacteria|o__Rhodospirillales|f__Acetobacteraceae|g__Roseomonas	579	462	364	456	443	258	195	233	216	236	289	231	d__Bacteria	p__Proteobacteria	c__Alphaproteobacteria	o__Rhodospirillales	f__Acetobacteraceae	g__Roseomonas
d__Bacteria|p__Proteobacteria|c__Alphaproteobacteria|o__Rhodospirillales|f__Acetobacteraceae|g__Komagataeibacter	550	762	521	1084	773	697	730	722	735	725	1390	972	d__Bacteria	p__Proteobacteria	c__Alphaproteobacteria	o__Rhodospirillales	f__Acetobacteraceae	g__Komagataeibacter
d__Bacteria|p__Proteobacteria|c__Alphaproteobacteria|o__Rhodospirillales|f__Acetobacteraceae|g__Parasaccharibacter	289	241	234	246	338	384	351	331	310	291	282	264	d__Bacteria	p__Proteobacteria	c__Alphaproteobacteria	o__Rhodospirillales	f__Acetobacteraceae	g__Parasaccharibacter
d__Bacteria|p__Proteobacteria|c__Alphaproteobacteria|o__Rhodospirillales|f__Acetobacteraceae|g__Gluconobacter	223	248	157	253	239	230	281	254	247	277	253	369	d__Bacteria	p__Proteobacteria	c__Alphaproteobacteria	o__Rhodospirillales	f__Acetobacteraceae	g__Gluconobacter
d__Bacteria|p__Proteobacteria|c__Alphaproteobacteria|o__Rhodospirillales|f__Acetobacteraceae|g__Kozakia	203	263	201	223	221	95	44	83	89	58	70	59	d__Bacteria	p__Proteobacteria	c__Alphaproteobacteria	o__Rhodospirillales	f__Acetobacteraceae	g__Kozakia
d__Bacteria|p__Proteobacteria|c__Alphaproteobacteria|o__Rhodospirillales|f__Acetobacteraceae|g__Granulibacter	171	184	138	184	186	220	176	142	130	170	172	192	d__Bacteria	p__Proteobacteria	c__Alphaproteobacteria	o__Rhodospirillales	f__Acetobacteraceae	g__Granulibacter
d__Bacteria|p__Proteobacteria|c__Alphaproteobacteria|o__Rhodospirillales|f__Acetobacteraceae|g__Acidiphilium	151	196	163	139	190	183	164	152	126	160	138	180	d__Bacteria	p__Proteobacteria	c__Alphaproteobacteria	o__Rhodospirillales	f__Acetobacteraceae	g__Acidiphilium
d__Bacteria|p__Proteobacteria|c__Alphaproteobacteria|o__Rhodospirillales|f__Acetobacteraceae|g__Gluconacetobacter	138	213	158	212	189	139	151	153	112	122	135	128	d__Bacteria	p__Proteobacteria	c__Alphaproteobacteria	o__Rhodospirillales	f__Acetobacteraceae	g__Gluconacetobacter
d__Bacteria|p__Proteobacteria|c__Alphaproteobacteria|o__Rhodospirillales|f__Acetobacteraceae|g__Neoasaia	86	122	86	85	115	72	82	63	90	78	112	93	d__Bacteria	p__Proteobacteria	c__Alphaproteobacteria	o__Rhodospirillales	f__Acetobacteraceae	g__Neoasaia
d__Bacteria|p__Proteobacteria|c__Alphaproteobacteria|o__Rhodospirillales|f__Acetobacteraceae|g__Asaia	63	79	47	92	83	63	106	62	72	91	74	108	d__Bacteria	p__Proteobacteria	c__Alphaproteobacteria	o__Rhodospirillales	f__Acetobacteraceae	g__Asaia
d__Bacteria|p__Proteobacteria|c__Alphaproteobacteria|o__Rhodospirillales|f__Acetobacteraceae|g__Acidisphaera	50	58	42	59	36	100	185	80	51	88	68	119	d__Bacteria	p__Proteobacteria	c__Alphaproteobacteria	o__Rhodospirillales	f__Acetobacteraceae	g__Acidisphaera
d__Bacteria|p__Proteobacteria|c__Alphaproteobacteria|o__Caulobacterales|f__Caulobacteraceae|g__Brevundimonas	1357	2624	1818	1904	1911	1793	2428	1639	1873	2051	1897	2303	d__Bacteria	p__Proteobacteria	c__Alphaproteobacteria	o__Caulobacterales	f__Caulobacteraceae	g__Brevundimonas
d__Bacteria|p__Proteobacteria|c__Alphaproteobacteria|o__Caulobacterales|f__Caulobacteraceae|g__Caulobacter	1215	1268	947	1102	1219	932	1053	902	866	993	1056	1199	d__Bacteria	p__Proteobacteria	c__Alphaproteobacteria	o__Caulobacterales	f__Caulobacteraceae	g__Caulobacter
d__Bacteria|p__Proteobacteria|c__Alphaproteobacteria|o__Caulobacterales|f__Caulobacteraceae|g__Phenylobacterium	366	408	322	331	338	362	326	293	266	304	317	394	d__Bacteria	p__Proteobacteria	c__Alphaproteobacteria	o__Caulobacterales	f__Caulobacteraceae	g__Phenylobacterium
d__Bacteria|p__Proteobacteria|c__Alphaproteobacteria|o__Caulobacterales|f__Caulobacteraceae|s__Caulobacteraceae bacterium OTSz_A_272	117	150	88	121	124	117	136	88	73	126	94	101	d__Bacteria	p__Proteobacteria	c__Alphaproteobacteria	o__Caulobacterales	f__Caulobacteraceae	s__Caulobacteraceae bacterium OTSz_A_272
d__Bacteria|p__Proteobacteria|c__Alphaproteobacteria|o__Caulobacterales|f__Caulobacteraceae|g__Asticcacaulis	79	95	84	101	82	110	116	98	101	105	132	176	d__Bacteria	p__Proteobacteria	c__Alphaproteobacteria	o__Caulobacterales	f__Caulobacteraceae	g__Asticcacaulis
d__Bacteria|p__Proteobacteria|c__Alphaproteobacteria|o__Rickettsiales|f__Rickettsiaceae|g__Rickettsia	319	318	307	318	376	254	251	220	232	242	289	295	d__Bacteria	p__Proteobacteria	c__Alphaproteobacteria	o__Rickettsiales	f__Rickettsiaceae	g__Rickettsia
d__Bacteria|p__Proteobacteria|c__Alphaproteobacteria|o__Rickettsiales|f__Rickettsiaceae|g__Orientia	42	26	30	25	45	35	38	28	43	34	32	41	d__Bacteria	p__Proteobacteria	c__Alphaproteobacteria	o__Rickettsiales	f__Rickettsiaceae	g__Orientia
d__Bacteria|p__Proteobacteria|c__Alphaproteobacteria|o__Rickettsiales|f__Rickettsiaceae|g__Candidatus Phycorickettsia	158	185	161	248	284	323	296	455	303	560	485	580	d__Bacteria	p__Proteobacteria	c__Alphaproteobacteria	o__Rickettsiales	f__Rickettsiaceae	g__Candidatus Phycorickettsia
d__Bacteria|p__Proteobacteria|c__Alphaproteobacteria|o__Rickettsiales|f__Anaplasmataceae|g__Wolbachia	191	165	156	260	237	246	206	123	193	155	191	179	d__Bacteria	p__Proteobacteria	c__Alphaproteobacteria	o__Rickettsiales	f__Anaplasmataceae	g__Wolbachia
d__Bacteria|p__Proteobacteria|c__Alphaproteobacteria|o__Rickettsiales|f__Anaplasmataceae|g__Ehrlichia	125	129	137	111	137	177	178	153	136	171	162	206	d__Bacteria	p__Proteobacteria	c__Alphaproteobacteria	o__Rickettsiales	f__Anaplasmataceae	g__Ehrlichia
d__Bacteria|p__Proteobacteria|c__Alphaproteobacteria|o__Rickettsiales|f__Anaplasmataceae|g__Neorickettsia	90	107	96	143	85	131	121	72	67	106	109	121	d__Bacteria	p__Proteobacteria	c__Alphaproteobacteria	o__Rickettsiales	f__Anaplasmataceae	g__Neorickettsia
d__Bacteria|p__Proteobacteria|c__Alphaproteobacteria|o__Rickettsiales|f__Anaplasmataceae|g__Anaplasma	73	112	120	80	117	80	55	60	64	41	71	51	d__Bacteria	p__Proteobacteria	c__Alphaproteobacteria	o__Rickettsiales	f__Anaplasmataceae	g__Anaplasma
d__Bacteria|p__Proteobacteria|c__Alphaproteobacteria|o__Rickettsiales|f__Candidatus Midichloriaceae|g__Candidatus Fokinia	24	27	24	25	31	25	31	19	20	25	16	25	d__Bacteria	p__Proteobacteria	c__Alphaproteobacteria	o__Rickettsiales	f__Candidatus Midichloriaceae	g__Candidatus Fokinia
d__Bacteria|p__Proteobacteria|c__Alphaproteobacteria|o__Rickettsiales|f__Candidatus Midichloriaceae|g__Candidatus Midichloria	13	26	25	34	17	30	22	22	13	10	19	15	d__Bacteria	p__Proteobacteria	c__Alphaproteobacteria	o__Rickettsiales	f__Candidatus Midichloriaceae	g__Candidatus Midichloria
d__Bacteria|p__Proteobacteria|c__Alphaproteobacteria|o__Pelagibacterales|f__Pelagibacteraceae|g__Candidatus Pelagibacter	187	244	293	185	277	245	204	211	177	217	190	262	d__Bacteria	p__Proteobacteria	c__Alphaproteobacteria	o__Pelagibacterales	f__Pelagibacteraceae	g__Candidatus Pelagibacter
d__Bacteria|p__Proteobacteria|c__Alphaproteobacteria|o__Pelagibacterales|f__Pelagibacteraceae|s__alpha proteobacterium HIMB5	47	75	77	67	102	75	46	59	79	63	87	52	d__Bacteria	p__Proteobacteria	c__Alphaproteobacteria	o__Pelagibacterales	f__Pelagibacteraceae	s__alpha proteobacterium HIMB5
d__Bacteria|p__Proteobacteria|c__Alphaproteobacteria|o__Pelagibacterales|f__Pelagibacteraceae|s__alpha proteobacterium HIMB59	46	40	31	41	40	43	49	54	39	55	52	52	d__Bacteria	p__Proteobacteria	c__Alphaproteobacteria	o__Pelagibacterales	f__Pelagibacteraceae	s__alpha proteobacterium HIMB59
d__Bacteria|p__Proteobacteria|c__Alphaproteobacteria|o__Pelagibacterales|g__Candidatus Fonsibacter|s__Candidatus Fonsibacter ubiquis	35	37	24	39	26	30	45	54	42	44	64	74	d__Bacteria	p__Proteobacteria	c__Alphaproteobacteria	o__Pelagibacterales	g__Candidatus Fonsibacter	s__Candidatus Fonsibacter ubiquis
d__Bacteria|p__Proteobacteria|c__Alphaproteobacteria|o__Holosporales|f__Candidatus Paracaedibacteraceae|g__Candidatus Paracaedibacter	88	100	64	112	89	104	91	69	54	73	93	86	d__Bacteria	p__Proteobacteria	c__Alphaproteobacteria	o__Holosporales	f__Candidatus Paracaedibacteraceae	g__Candidatus Paracaedibacter
d__Bacteria|p__Proteobacteria|c__Alphaproteobacteria|o__Holosporales|f__Holosporaceae|s__endosymbiont of Acanthamoeba sp. UWC8	45	78	50	72	71	46	42	48	50	46	52	49	d__Bacteria	p__Proteobacteria	c__Alphaproteobacteria	o__Holosporales	f__Holosporaceae	s__endosymbiont of Acanthamoeba sp. UWC8
d__Bacteria|p__Proteobacteria|c__Alphaproteobacteria|o__Holosporales|f__Caedimonadaceae|g__Candidatus Nucleicultrix	36	51	57	43	42	51	37	43	53	51	43	43	d__Bacteria	p__Proteobacteria	c__Alphaproteobacteria	o__Holosporales	f__Caedimonadaceae	g__Candidatus Nucleicultrix
d__Bacteria|p__Proteobacteria|c__Alphaproteobacteria|o__Magnetococcales|f__Magnetococcaceae|g__Magnetococcus	158	154	121	143	140	161	149	174	123	163	169	170	d__Bacteria	p__Proteobacteria	c__Alphaproteobacteria	o__Magnetococcales	f__Magnetococcaceae	g__Magnetococcus
d__Bacteria|p__Proteobacteria|c__Alphaproteobacteria|o__Parvularculales|f__Parvularculaceae|g__Parvularcula	139	147	124	137	114	176	118	103	106	122	138	165	d__Bacteria	p__Proteobacteria	c__Alphaproteobacteria	o__Parvularculales	f__Parvularculaceae	g__Parvularcula
d__Bacteria|p__Proteobacteria|c__Betaproteobacteria|o__Burkholderiales|f__Burkholderiaceae|g__Burkholderia	6161	7832	6422	6840	7122	8503	7507	6797	6827	6882	6897	12416	d__Bacteria	p__Proteobacteria	c__Betaproteobacteria	o__Burkholderiales	f__Burkholderiaceae	g__Burkholderia
d__Bacteria|p__Proteobacteria|c__Betaproteobacteria|o__Burkholderiales|f__Burkholderiaceae|g__Paraburkholderia	3921	4083	3436	4142	5409	7023	4554	4450	4036	4674	5648	8283	d__Bacteria	p__Proteobacteria	c__Betaproteobacteria	o__Burkholderiales	f__Burkholderiaceae	g__Paraburkholderia
d__Bacteria|p__Proteobacteria|c__Betaproteobacteria|o__Burkholderiales|f__Burkholderiaceae|g__Cupriavidus	2311	2495	2129	2316	2533	1829	1668	1527	1669	1607	1725	1906	d__Bacteria	p__Proteobacteria	c__Betaproteobacteria	o__Burkholderiales	f__Burkholderiaceae	g__Cupriavidus
d__Bacteria|p__Proteobacteria|c__Betaproteobacteria|o__Burkholderiales|f__Burkholderiaceae|g__Ralstonia	1017	1078	907	946	1136	922	1042	875	883	913	991	1162	d__Bacteria	p__Proteobacteria	c__Betaproteobacteria	o__Burkholderiales	f__Burkholderiaceae	g__Ralstonia
d__Bacteria|p__Proteobacteria|c__Betaproteobacteria|o__Burkholderiales|f__Burkholderiaceae|g__Pandoraea	774	777	702	746	759	798	751	686	596	798	738	936	d__Bacteria	p__Proteobacteria	c__Betaproteobacteria	o__Burkholderiales	f__Burkholderiaceae	g__Pandoraea
d__Bacteria|p__Proteobacteria|c__Betaproteobacteria|o__Burkholderiales|f__Burkholderiaceae|g__Polynucleobacter	463	507	419	556	563	698	803	720	513	775	800	1053	d__Bacteria	p__Proteobacteria	c__Betaproteobacteria	o__Burkholderiales	f__Burkholderiaceae	g__Polynucleobacter
d__Bacteria|p__Proteobacteria|c__Betaproteobacteria|o__Burkholderiales|f__Burkholderiaceae|g__Paucimonas	65	89	63	100	108	72	83	81	80	92	96	134	d__Bacteria	p__Proteobacteria	c__Betaproteobacteria	o__Burkholderiales	f__Burkholderiaceae	g__Paucimonas
d__Bacteria|p__Proteobacteria|c__Betaproteobacteria|o__Burkholderiales|f__Burkholderiaceae|g__Hydromonas	59	44	34	49	54	83	53	55	51	65	79	76	d__Bacteria	p__Proteobacteria	c__Betaproteobacteria	o__Burkholderiales	f__Burkholderiaceae	g__Hydromonas
d__Bacteria|p__Proteobacteria|c__Betaproteobacteria|o__Burkholderiales|f__Alcaligenaceae|g__Achromobacter	3041	3823	2796	3418	4146	16553	3738	3881	3414	4191	5723	8993	d__Bacteria	p__Proteobacteria	c__Betaproteobacteria	o__Burkholderiales	f__Alcaligenaceae	g__Achromobacter
d__Bacteria|p__Proteobacteria|c__Betaproteobacteria|o__Burkholderiales|f__Alcaligenaceae|g__Bordetella	2204	2912	2458	2731	2992	2400	2109	1936	2035	2091	2228	2532	d__Bacteria	p__Proteobacteria	c__Betaproteobacteria	o__Burkholderiales	f__Alcaligenaceae	g__Bordetella
d__Bacteria|p__Proteobacteria|c__Betaproteobacteria|o__Burkholderiales|f__Alcaligenaceae|g__Taylorella	500	333	318	360	363	257	173	196	284	163	289	146	d__Bacteria	p__Proteobacteria	c__Betaproteobacteria	o__Burkholderiales	f__Alcaligenaceae	g__Taylorella
d__Bacteria|p__Proteobacteria|c__Betaproteobacteria|o__Burkholderiales|f__Alcaligenaceae|g__Alcaligenes	366	433	374	368	393	282	368	289	264	332	340	420	d__Bacteria	p__Proteobacteria	c__Betaproteobacteria	o__Burkholderiales	f__Alcaligenaceae	g__Alcaligenes
d__Bacteria|p__Proteobacteria|c__Betaproteobacteria|o__Burkholderiales|f__Alcaligenaceae|g__Castellaniella	238	286	218	233	317	190	239	203	203	207	218	184	d__Bacteria	p__Proteobacteria	c__Betaproteobacteria	o__Burkholderiales	f__Alcaligenaceae	g__Castellaniella
d__Bacteria|p__Proteobacteria|c__Betaproteobacteria|o__Burkholderiales|f__Alcaligenaceae|g__Advenella	142	173	134	157	211	183	168	175	118	174	174	188	d__Bacteria	p__Proteobacteria	c__Betaproteobacteria	o__Burkholderiales	f__Alcaligenaceae	g__Advenella
d__Bacteria|p__Proteobacteria|c__Betaproteobacteria|o__Burkholderiales|f__Alcaligenaceae|g__Orrella	62	99	63	78	76	74	72	70	76	87	54	70	d__Bacteria	p__Proteobacteria	c__Betaproteobacteria	o__Burkholderiales	f__Alcaligenaceae	g__Orrella
d__Bacteria|p__Proteobacteria|c__Betaproteobacteria|o__Burkholderiales|f__Alcaligenaceae|g__Pusillimonas	55	49	53	52	66	66	65	51	55	42	62	64	d__Bacteria	p__Proteobacteria	c__Betaproteobacteria	o__Burkholderiales	f__Alcaligenaceae	g__Pusillimonas
d__Bacteria|p__Proteobacteria|c__Betaproteobacteria|o__Burkholderiales|f__Alcaligenaceae|g__Oligella	22	21	32	20	33	28	34	16	14	35	28	33	d__Bacteria	p__Proteobacteria	c__Betaproteobacteria	o__Burkholderiales	f__Alcaligenaceae	g__Oligella
d__Bacteria|p__Proteobacteria|c__Betaproteobacteria|o__Burkholderiales|f__Alcaligenaceae|g__Basilea	16	35	17	33	30	62	22	24	19	27	32	38	d__Bacteria	p__Proteobacteria	c__Betaproteobacteria	o__Burkholderiales	f__Alcaligenaceae	g__Basilea
d__Bacteria|p__Proteobacteria|c__Betaproteobacteria|o__Burkholderiales|f__Alcaligenaceae|g__Paenalcaligenes	9	14	9	13	16	29	16	9	11	18	14	26	d__Bacteria	p__Proteobacteria	c__Betaproteobacteria	o__Burkholderiales	f__Alcaligenaceae	g__Paenalcaligenes
d__Bacteria|p__Proteobacteria|c__Betaproteobacteria|o__Burkholderiales|f__Comamonadaceae|g__Variovorax	1213	1190	957	1150	1233	1188	1062	1031	1007	1135	1189	1339	d__Bacteria	p__Proteobacteria	c__Betaproteobacteria	o__Burkholderiales	f__Comamonadaceae	g__Variovorax
d__Bacteria|p__Proteobacteria|c__Betaproteobacteria|o__Burkholderiales|f__Comamonadaceae|g__Polaromonas	898	1007	901	966	1179	867	1388	1265	818	1178	935	1033	d__Bacteria	p__Proteobacteria	c__Betaproteobacteria	o__Burkholderiales	f__Comamonadaceae	g__Polaromonas
d__Bacteria|p__Proteobacteria|c__Betaproteobacteria|o__Burkholderiales|f__Comamonadaceae|g__Acidovorax	872	973	768	834	964	774	926	675	763	739	778	866	d__Bacteria	p__Proteobacteria	c__Betaproteobacteria	o__Burkholderiales	f__Comamonadaceae	g__Acidovorax
d__Bacteria|p__Proteobacteria|c__Betaproteobacteria|o__Burkholderiales|f__Comamonadaceae|g__Comamonas	618	668	552	625	682	567	617	523	569	614	601	580	d__Bacteria	p__Proteobacteria	c__Betaproteobacteria	o__Burkholderiales	f__Comamonadaceae	g__Comamonas
d__Bacteria|p__Proteobacteria|c__Betaproteobacteria|o__Burkholderiales|f__Comamonadaceae|g__Rhodoferax	576	745	557	676	753	648	727	620	635	720	769	870	d__Bacteria	p__Proteobacteria	c__Betaproteobacteria	o__Burkholderiales	f__Comamonadaceae	g__Rhodoferax
d__Bacteria|p__Proteobacteria|c__Betaproteobacteria|o__Burkholderiales|f__Comamonadaceae|g__Delftia	346	443	360	417	407	343	338	374	341	363	389	381	d__Bacteria	p__Proteobacteria	c__Betaproteobacteria	o__Burkholderiales	f__Comamonadaceae	g__Delftia
d__Bacteria|p__Proteobacteria|c__Betaproteobacteria|o__Burkholderiales|f__Comamonadaceae|g__Alicycliphilus	327	381	315	291	261	267	175	173	162	164	252	209	d__Bacteria	p__Proteobacteria	c__Betaproteobacteria	o__Burkholderiales	f__Comamonadaceae	g__Alicycliphilus
d__Bacteria|p__Proteobacteria|c__Betaproteobacteria|o__Burkholderiales|f__Comamonadaceae|g__Hydrogenophaga	266	335	286	302	327	246	239	250	238	269	278	257	d__Bacteria	p__Proteobacteria	c__Betaproteobacteria	o__Burkholderiales	f__Comamonadaceae	g__Hydrogenophaga
d__Bacteria|p__Proteobacteria|c__Betaproteobacteria|o__Burkholderiales|f__Comamonadaceae|g__Ramlibacter	218	312	266	363	275	336	232	183	232	231	294	416	d__Bacteria	p__Proteobacteria	c__Betaproteobacteria	o__Burkholderiales	f__Comamonadaceae	g__Ramlibacter
d__Bacteria|p__Proteobacteria|c__Betaproteobacteria|o__Burkholderiales|f__Comamonadaceae|g__Melaminivora	199	249	188	183	191	180	213	195	167	185	172	201	d__Bacteria	p__Proteobacteria	c__Betaproteobacteria	o__Burkholderiales	f__Comamonadaceae	g__Melaminivora
d__Bacteria|p__Proteobacteria|c__Betaproteobacteria|o__Burkholderiales|f__Comamonadaceae|s__Comamonadaceae bacterium B1	120	187	146	133	132	117	142	101	118	123	104	149	d__Bacteria	p__Proteobacteria	c__Betaproteobacteria	o__Burkholderiales	f__Comamonadaceae	s__Comamonadaceae bacterium B1
d__Bacteria|p__Proteobacteria|c__Betaproteobacteria|o__Burkholderiales|f__Comamonadaceae|s__Comamonadaceae bacterium A1	41	67	48	41	58	93	78	80	60	77	67	107	d__Bacteria	p__Proteobacteria	c__Betaproteobacteria	o__Burkholderiales	f__Comamonadaceae	s__Comamonadaceae bacterium A1
d__Bacteria|p__Proteobacteria|c__Betaproteobacteria|o__Burkholderiales|f__Comamonadaceae|g__Ottowia	172	168	151	163	178	185	172	193	159	188	166	215	d__Bacteria	p__Proteobacteria	c__Betaproteobacteria	o__Burkholderiales	f__Comamonadaceae	g__Ottowia
d__Bacteria|p__Proteobacteria|c__Betaproteobacteria|o__Burkholderiales|f__Comamonadaceae|g__Diaphorobacter	126	93	82	131	147	218	245	188	149	237	123	135	d__Bacteria	p__Proteobacteria	c__Betaproteobacteria	o__Burkholderiales	f__Comamonadaceae	g__Diaphorobacter
d__Bacteria|p__Proteobacteria|c__Betaproteobacteria|o__Burkholderiales|f__Comamonadaceae|g__Curvibacter	117	180	107	177	191	164	230	176	164	209	196	278	d__Bacteria	p__Proteobacteria	c__Betaproteobacteria	o__Burkholderiales	f__Comamonadaceae	g__Curvibacter
d__Bacteria|p__Proteobacteria|c__Betaproteobacteria|o__Burkholderiales|f__Comamonadaceae|g__Limnohabitans	93	105	95	140	115	138	162	128	84	138	127	119	d__Bacteria	p__Proteobacteria	c__Betaproteobacteria	o__Burkholderiales	f__Comamonadaceae	g__Limnohabitans
d__Bacteria|p__Proteobacteria|c__Betaproteobacteria|o__Burkholderiales|f__Comamonadaceae|g__Simplicispira	87	102	92	72	71	79	83	70	62	86	81	87	d__Bacteria	p__Proteobacteria	c__Betaproteobacteria	o__Burkholderiales	f__Comamonadaceae	g__Simplicispira
d__Bacteria|p__Proteobacteria|c__Betaproteobacteria|o__Burkholderiales|f__Comamonadaceae|g__Candidatus Symbiobacter	71	59	55	64	62	83	73	60	58	73	60	95	d__Bacteria	p__Proteobacteria	c__Betaproteobacteria	o__Burkholderiales	f__Comamonadaceae	g__Candidatus Symbiobacter
d__Bacteria|p__Proteobacteria|c__Betaproteobacteria|o__Burkholderiales|f__Comamonadaceae|g__Verminephrobacter	62	99	75	71	90	84	63	54	53	61	100	81	d__Bacteria	p__Proteobacteria	c__Betaproteobacteria	o__Burkholderiales	f__Comamonadaceae	g__Verminephrobacter
d__Bacteria|p__Proteobacteria|c__Betaproteobacteria|o__Burkholderiales|f__Oxalobacteraceae|g__Massilia	1144	1162	1031	1094	1155	1000	970	909	928	1034	936	1130	d__Bacteria	p__Proteobacteria	c__Betaproteobacteria	o__Burkholderiales	f__Oxalobacteraceae	g__Massilia
d__Bacteria|p__Proteobacteria|c__Betaproteobacteria|o__Burkholderiales|f__Oxalobacteraceae|g__Herminiimonas	759	754	626	848	814	934	1510	637	550	668	595	522	d__Bacteria	p__Proteobacteria	c__Betaproteobacteria	o__Burkholderiales	f__Oxalobacteraceae	g__Herminiimonas
d__Bacteria|p__Proteobacteria|c__Betaproteobacteria|o__Burkholderiales|f__Oxalobacteraceae|g__Herbaspirillum	660	779	613	658	703	762	826	661	563	790	650	803	d__Bacteria	p__Proteobacteria	c__Betaproteobacteria	o__Burkholderiales	f__Oxalobacteraceae	g__Herbaspirillum
d__Bacteria|p__Proteobacteria|c__Betaproteobacteria|o__Burkholderiales|f__Oxalobacteraceae|g__Collimonas	658	1069	871	952	1106	811	837	753	828	934	947	1185	d__Bacteria	p__Proteobacteria	c__Betaproteobacteria	o__Burkholderiales	f__Oxalobacteraceae	g__Collimonas
d__Bacteria|p__Proteobacteria|c__Betaproteobacteria|o__Burkholderiales|f__Oxalobacteraceae|g__Janthinobacterium	413	431	366	461	456	441	441	365	389	437	426	537	d__Bacteria	p__Proteobacteria	c__Betaproteobacteria	o__Burkholderiales	f__Oxalobacteraceae	g__Janthinobacterium
d__Bacteria|p__Proteobacteria|c__Betaproteobacteria|o__Burkholderiales|f__Oxalobacteraceae|g__Oxalobacter	60	111	90	113	90	331	42	369	215	278	277	142	d__Bacteria	p__Proteobacteria	c__Betaproteobacteria	o__Burkholderiales	f__Oxalobacteraceae	g__Oxalobacter
d__Bacteria|p__Proteobacteria|c__Betaproteobacteria|o__Burkholderiales|g__Thiomonas|s__Thiomonas sp. X19	105	101	81	114	102	98	78	77	103	96	99	96	d__Bacteria	p__Proteobacteria	c__Betaproteobacteria	o__Burkholderiales	g__Thiomonas	s__Thiomonas sp. X19
d__Bacteria|p__Proteobacteria|c__Betaproteobacteria|o__Burkholderiales|g__Thiomonas|s__Thiomonas intermedia	72	167	113	200	128	96	94	109	100	83	121	101	d__Bacteria	p__Proteobacteria	c__Betaproteobacteria	o__Burkholderiales	g__Thiomonas	s__Thiomonas intermedia
d__Bacteria|p__Proteobacteria|c__Betaproteobacteria|o__Burkholderiales|g__Thiomonas|s__Thiomonas arsenitoxydans	68	114	68	85	106	66	39	57	42	58	42	35	d__Bacteria	p__Proteobacteria	c__Betaproteobacteria	o__Burkholderiales	g__Thiomonas	s__Thiomonas arsenitoxydans
d__Bacteria|p__Proteobacteria|c__Betaproteobacteria|o__Burkholderiales|g__Rhizobacter|s__Rhizobacter gummiphilus	151	227	164	196	180	150	150	156	140	130	132	200	d__Bacteria	p__Proteobacteria	c__Betaproteobacteria	o__Burkholderiales	g__Rhizobacter	s__Rhizobacter gummiphilus
d__Bacteria|p__Proteobacteria|c__Betaproteobacteria|o__Burkholderiales|g__Rubrivivax|s__Rubrivivax gelatinosus	144	160	144	185	182	155	181	157	141	190	173	202	d__Bacteria	p__Proteobacteria	c__Betaproteobacteria	o__Burkholderiales	g__Rubrivivax	s__Rubrivivax gelatinosus
d__Bacteria|p__Proteobacteria|c__Betaproteobacteria|o__Burkholderiales|g__Roseateles|s__Roseateles depolymerans	137	116	99	103	109	108	86	81	92	76	60	65	d__Bacteria	p__Proteobacteria	c__Betaproteobacteria	o__Burkholderiales	g__Roseateles	s__Roseateles depolymerans
d__Bacteria|p__Proteobacteria|c__Betaproteobacteria|o__Burkholderiales|g__Mitsuaria|s__Mitsuaria sp. 7	126	140	132	119	155	133	134	119	115	136	128	172	d__Bacteria	p__Proteobacteria	c__Betaproteobacteria	o__Burkholderiales	g__Mitsuaria	s__Mitsuaria sp. 7
d__Bacteria|p__Proteobacteria|c__Betaproteobacteria|o__Burkholderiales|g__Methylibium|s__Methylibium petroleiphilum	118	128	111	119	101	128	162	171	132	188	110	189	d__Bacteria	p__Proteobacteria	c__Betaproteobacteria	o__Burkholderiales	g__Methylibium	s__Methylibium petroleiphilum
d__Bacteria|p__Proteobacteria|c__Betaproteobacteria|o__Burkholderiales|g__Aquabacterium|s__Aquabacterium olei	116	212	113	156	168	139	149	112	126	126	136	157	d__Bacteria	p__Proteobacteria	c__Betaproteobacteria	o__Burkholderiales	g__Aquabacterium	s__Aquabacterium olei
d__Bacteria|p__Proteobacteria|c__Betaproteobacteria|o__Burkholderiales|g__Leptothrix|s__Leptothrix cholodnii	113	116	92	104	100	110	118	94	108	117	107	146	d__Bacteria	p__Proteobacteria	c__Betaproteobacteria	o__Burkholderiales	g__Leptothrix	s__Leptothrix cholodnii
d__Bacteria|p__Proteobacteria|c__Betaproteobacteria|o__Burkholderiales|g__Paucibacter|s__Paucibacter sp. KCTC 42545	102	88	83	112	109	103	145	92	80	117	104	135	d__Bacteria	p__Proteobacteria	c__Betaproteobacteria	o__Burkholderiales	g__Paucibacter	s__Paucibacter sp. KCTC 42545
d__Bacteria|p__Proteobacteria|c__Betaproteobacteria|o__Burkholderiales|f__Sutterellaceae|g__Sutterella	481	511	386	385	501	636	794	636	489	600	526	631	d__Bacteria	p__Proteobacteria	c__Betaproteobacteria	o__Burkholderiales	f__Sutterellaceae	g__Sutterella
d__Bacteria|p__Proteobacteria|c__Betaproteobacteria|o__Nitrosomonadales|f__Gallionellaceae|g__Sideroxydans	1777	2090	1969	1225	1943	1423	1113	1483	1479	1069	1323	862	d__Bacteria	p__Proteobacteria	c__Betaproteobacteria	o__Nitrosomonadales	f__Gallionellaceae	g__Sideroxydans
d__Bacteria|p__Proteobacteria|c__Betaproteobacteria|o__Nitrosomonadales|f__Gallionellaceae|g__Sulfuricella	1049	1798	2034	1590	1718	143	114	115	304	93	272	120	d__Bacteria	p__Proteobacteria	c__Betaproteobacteria	o__Nitrosomonadales	f__Gallionellaceae	g__Sulfuricella
d__Bacteria|p__Proteobacteria|c__Betaproteobacteria|o__Nitrosomonadales|f__Gallionellaceae|g__Gallionella	187	286	202	258	275	190	103	194	196	134	225	112	d__Bacteria	p__Proteobacteria	c__Betaproteobacteria	o__Nitrosomonadales	f__Gallionellaceae	g__Gallionella
d__Bacteria|p__Proteobacteria|c__Betaproteobacteria|o__Nitrosomonadales|f__Gallionellaceae|g__Ferriphaselus	116	149	126	173	167	166	221	168	159	252	233	248	d__Bacteria	p__Proteobacteria	c__Betaproteobacteria	o__Nitrosomonadales	f__Gallionellaceae	g__Ferriphaselus
d__Bacteria|p__Proteobacteria|c__Betaproteobacteria|o__Nitrosomonadales|f__Gallionellaceae|g__Sulfuriferula	73	109	124	72	80	84	69	65	70	69	66	74	d__Bacteria	p__Proteobacteria	c__Betaproteobacteria	o__Nitrosomonadales	f__Gallionellaceae	g__Sulfuriferula
d__Bacteria|p__Proteobacteria|c__Betaproteobacteria|o__Nitrosomonadales|f__Methylophilaceae|g__Methylovorus	2001	1047	1285	698	918	1018	799	902	646	776	421	419	d__Bacteria	p__Proteobacteria	c__Betaproteobacteria	o__Nitrosomonadales	f__Methylophilaceae	g__Methylovorus
d__Bacteria|p__Proteobacteria|c__Betaproteobacteria|o__Nitrosomonadales|f__Methylophilaceae|g__Methylotenera	228	262	234	301	407	103	93	107	198	83	213	64	d__Bacteria	p__Proteobacteria	c__Betaproteobacteria	o__Nitrosomonadales	f__Methylophilaceae	g__Methylotenera
d__Bacteria|p__Proteobacteria|c__Betaproteobacteria|o__Nitrosomonadales|f__Methylophilaceae|g__Methylobacillus	103	129	119	96	112	122	73	79	92	84	92	74	d__Bacteria	p__Proteobacteria	c__Betaproteobacteria	o__Nitrosomonadales	f__Methylophilaceae	g__Methylobacillus
d__Bacteria|p__Proteobacteria|c__Betaproteobacteria|o__Nitrosomonadales|f__Methylophilaceae|g__Candidatus Methylopumilus	60	56	49	68	69	97	71	75	80	104	137	111	d__Bacteria	p__Proteobacteria	c__Betaproteobacteria	o__Nitrosomonadales	f__Methylophilaceae	g__Candidatus Methylopumilus
d__Bacteria|p__Proteobacteria|c__Betaproteobacteria|o__Nitrosomonadales|f__Methylophilaceae|g__Methylophilus	19	22	14	25	15	26	25	22	19	26	30	40	d__Bacteria	p__Proteobacteria	c__Betaproteobacteria	o__Nitrosomonadales	f__Methylophilaceae	g__Methylophilus
d__Bacteria|p__Proteobacteria|c__Betaproteobacteria|o__Nitrosomonadales|f__Sterolibacteriaceae|g__Methyloversatilis	541	493	484	650	766	353	163	320	312	216	336	183	d__Bacteria	p__Proteobacteria	c__Betaproteobacteria	o__Nitrosomonadales	f__Sterolibacteriaceae	g__Methyloversatilis
d__Bacteria|p__Proteobacteria|c__Betaproteobacteria|o__Nitrosomonadales|f__Sterolibacteriaceae|g__Sulfuritalea	195	191	176	195	229	120	90	99	121	98	112	93	d__Bacteria	p__Proteobacteria	c__Betaproteobacteria	o__Nitrosomonadales	f__Sterolibacteriaceae	g__Sulfuritalea
d__Bacteria|p__Proteobacteria|c__Betaproteobacteria|o__Nitrosomonadales|f__Nitrosomonadaceae|g__Nitrosomonas	298	347	311	320	366	338	305	295	290	298	300	303	d__Bacteria	p__Proteobacteria	c__Betaproteobacteria	o__Nitrosomonadales	f__Nitrosomonadaceae	g__Nitrosomonas
d__Bacteria|p__Proteobacteria|c__Betaproteobacteria|o__Nitrosomonadales|f__Nitrosomonadaceae|g__Nitrosospira	187	203	189	191	185	205	215	184	157	214	190	192	d__Bacteria	p__Proteobacteria	c__Betaproteobacteria	o__Nitrosomonadales	f__Nitrosomonadaceae	g__Nitrosospira
d__Bacteria|p__Proteobacteria|c__Betaproteobacteria|o__Nitrosomonadales|f__Thiobacillaceae|g__Thiobacillus	106	146	135	158	181	134	131	135	104	119	148	147	d__Bacteria	p__Proteobacteria	c__Betaproteobacteria	o__Nitrosomonadales	f__Thiobacillaceae	g__Thiobacillus
d__Bacteria|p__Proteobacteria|c__Betaproteobacteria|o__Neisseriales|f__Chromobacteriaceae|g__Chromobacterium	1753	1869	1992	1327	1741	1737	1865	1722	1422	1852	1174	1232	d__Bacteria	p__Proteobacteria	c__Betaproteobacteria	o__Neisseriales	f__Chromobacteriaceae	g__Chromobacterium
d__Bacteria|p__Proteobacteria|c__Betaproteobacteria|o__Neisseriales|f__Chromobacteriaceae|g__Aquitalea	258	320	278	215	248	216	112	187	195	144	160	120	d__Bacteria	p__Proteobacteria	c__Betaproteobacteria	o__Neisseriales	f__Chromobacteriaceae	g__Aquitalea
d__Bacteria|p__Proteobacteria|c__Betaproteobacteria|o__Neisseriales|f__Chromobacteriaceae|g__Laribacter	145	124	106	124	160	133	121	111	105	100	116	135	d__Bacteria	p__Proteobacteria	c__Betaproteobacteria	o__Neisseriales	f__Chromobacteriaceae	g__Laribacter
d__Bacteria|p__Proteobacteria|c__Betaproteobacteria|o__Neisseriales|f__Chromobacteriaceae|g__Jeongeupia	139	148	128	119	158	126	104	131	133	120	109	130	d__Bacteria	p__Proteobacteria	c__Betaproteobacteria	o__Neisseriales	f__Chromobacteriaceae	g__Jeongeupia
d__Bacteria|p__Proteobacteria|c__Betaproteobacteria|o__Neisseriales|f__Chromobacteriaceae|g__Vogesella	131	118	103	130	135	139	147	112	120	127	154	137	d__Bacteria	p__Proteobacteria	c__Betaproteobacteria	o__Neisseriales	f__Chromobacteriaceae	g__Vogesella
d__Bacteria|p__Proteobacteria|c__Betaproteobacteria|o__Neisseriales|f__Chromobacteriaceae|g__Microvirgula	99	120	74	118	99	113	83	87	87	87	86	107	d__Bacteria	p__Proteobacteria	c__Betaproteobacteria	o__Neisseriales	f__Chromobacteriaceae	g__Microvirgula
d__Bacteria|p__Proteobacteria|c__Betaproteobacteria|o__Neisseriales|f__Chromobacteriaceae|g__Aquaspirillum	81	68	57	60	80	64	43	57	51	60	44	62	d__Bacteria	p__Proteobacteria	c__Betaproteobacteria	o__Neisseriales	f__Chromobacteriaceae	g__Aquaspirillum
d__Bacteria|p__Proteobacteria|c__Betaproteobacteria|o__Neisseriales|f__Chromobacteriaceae|g__Pseudogulbenkiania	70	112	87	98	88	87	81	82	75	91	77	87	d__Bacteria	p__Proteobacteria	c__Betaproteobacteria	o__Neisseriales	f__Chromobacteriaceae	g__Pseudogulbenkiania
d__Bacteria|p__Proteobacteria|c__Betaproteobacteria|o__Neisseriales|f__Neisseriaceae|g__Neisseria	2172	4560	3176	4175	3648	3322	4230	3464	3870	4101	4709	6677	d__Bacteria	p__Proteobacteria	c__Betaproteobacteria	o__Neisseriales	f__Neisseriaceae	g__Neisseria
d__Bacteria|p__Proteobacteria|c__Betaproteobacteria|o__Neisseriales|f__Neisseriaceae|g__Crenobacter	124	167	124	124	121	114	129	112	89	128	98	147	d__Bacteria	p__Proteobacteria	c__Betaproteobacteria	o__Neisseriales	f__Neisseriaceae	g__Crenobacter
d__Bacteria|p__Proteobacteria|c__Betaproteobacteria|o__Neisseriales|f__Neisseriaceae|g__Eikenella	105	117	85	100	117	59	68	56	52	70	70	84	d__Bacteria	p__Proteobacteria	c__Betaproteobacteria	o__Neisseriales	f__Neisseriaceae	g__Eikenella
d__Bacteria|p__Proteobacteria|c__Betaproteobacteria|o__Neisseriales|f__Neisseriaceae|g__Vitreoscilla	96	107	82	94	103	97	101	68	95	84	122	120	d__Bacteria	p__Proteobacteria	c__Betaproteobacteria	o__Neisseriales	f__Neisseriaceae	g__Vitreoscilla
d__Bacteria|p__Proteobacteria|c__Betaproteobacteria|o__Neisseriales|f__Neisseriaceae|g__Simonsiella	42	61	40	54	58	100	203	115	67	112	108	131	d__Bacteria	p__Proteobacteria	c__Betaproteobacteria	o__Neisseriales	f__Neisseriaceae	g__Simonsiella
d__Bacteria|p__Proteobacteria|c__Betaproteobacteria|o__Neisseriales|f__Neisseriaceae|g__Snodgrassella	39	37	42	41	46	49	30	47	37	38	32	47	d__Bacteria	p__Proteobacteria	c__Betaproteobacteria	o__Neisseriales	f__Neisseriaceae	g__Snodgrassella
d__Bacteria|p__Proteobacteria|c__Betaproteobacteria|o__Neisseriales|f__Neisseriaceae|g__Kingella	33	40	34	35	29	52	35	43	29	49	43	34	d__Bacteria	p__Proteobacteria	c__Betaproteobacteria	o__Neisseriales	f__Neisseriaceae	g__Kingella
d__Bacteria|p__Proteobacteria|c__Betaproteobacteria|o__Neisseriales|f__Neisseriaceae|s__Neisseriaceae bacterium DSM 100970	31	34	25	42	29	40	42	27	29	39	42	52	d__Bacteria	p__Proteobacteria	c__Betaproteobacteria	o__Neisseriales	f__Neisseriaceae	s__Neisseriaceae bacterium DSM 100970
d__Bacteria|p__Proteobacteria|c__Betaproteobacteria|o__Rhodocyclales|f__Zoogloeaceae|g__Azoarcus	958	1094	787	975	960	901	961	1017	923	1005	993	1191	d__Bacteria	p__Proteobacteria	c__Betaproteobacteria	o__Rhodocyclales	f__Zoogloeaceae	g__Azoarcus
d__Bacteria|p__Proteobacteria|c__Betaproteobacteria|o__Rhodocyclales|f__Zoogloeaceae|g__Thauera	639	795	687	687	661	685	657	627	566	693	694	833	d__Bacteria	p__Proteobacteria	c__Betaproteobacteria	o__Rhodocyclales	f__Zoogloeaceae	g__Thauera
d__Bacteria|p__Proteobacteria|c__Betaproteobacteria|o__Rhodocyclales|f__Zoogloeaceae|s__Zoogloeaceae bacteirum Par-f-2	2	5	5	5	5	8	6	6	7	8	4	9	d__Bacteria	p__Proteobacteria	c__Betaproteobacteria	o__Rhodocyclales	f__Zoogloeaceae	s__Zoogloeaceae bacteirum Par-f-2
d__Bacteria|p__Proteobacteria|c__Betaproteobacteria|o__Rhodocyclales|f__Rhodocyclaceae|g__Azospira	223	244	208	227	209	202	199	167	163	181	150	184	d__Bacteria	p__Proteobacteria	c__Betaproteobacteria	o__Rhodocyclales	f__Rhodocyclaceae	g__Azospira
d__Bacteria|p__Proteobacteria|c__Betaproteobacteria|o__Rhodocyclales|f__Rhodocyclaceae|g__Aromatoleum	196	229	206	201	215	230	254	197	199	239	226	271	d__Bacteria	p__Proteobacteria	c__Betaproteobacteria	o__Rhodocyclales	f__Rhodocyclaceae	g__Aromatoleum
d__Bacteria|p__Proteobacteria|c__Betaproteobacteria|o__Rhodocyclales|f__Rhodocyclaceae|s__Rhodocyclaceae bacterium	29	20	24	28	32	16	7	13	25	7	22	11	d__Bacteria	p__Proteobacteria	c__Betaproteobacteria	o__Rhodocyclales	f__Rhodocyclaceae	s__Rhodocyclaceae bacterium
d__Bacteria|p__Proteobacteria|c__Betaproteobacteria|o__Rhodocyclales|f__Azonexaceae|g__Dechloromonas	185	228	169	215	230	238	306	210	209	263	228	292	d__Bacteria	p__Proteobacteria	c__Betaproteobacteria	o__Rhodocyclales	f__Azonexaceae	g__Dechloromonas
d__Bacteria|p__Proteobacteria|c__Zetaproteobacteria|o__Mariprofundales|f__Mariprofundaceae|g__Mariprofundus	704	695	648	980	799	720	856	762	557	801	916	1023	d__Bacteria	p__Proteobacteria	c__Zetaproteobacteria	o__Mariprofundales	f__Mariprofundaceae	g__Mariprofundus
d__Bacteria|p__Proteobacteria|c__Oligoflexia|o__Bdellovibrionales|f__Bdellovibrionaceae|g__Bdellovibrio	373	369	305	458	447	398	414	354	352	451	448	507	d__Bacteria	p__Proteobacteria	c__Oligoflexia	o__Bdellovibrionales	f__Bdellovibrionaceae	g__Bdellovibrio
d__Bacteria|p__Proteobacteria|c__Oligoflexia|o__Bacteriovoracales|f__Halobacteriovoraceae|g__Halobacteriovorax	68	70	63	98	99	98	122	111	79	114	127	133	d__Bacteria	p__Proteobacteria	c__Oligoflexia	o__Bacteriovoracales	f__Halobacteriovoraceae	g__Halobacteriovorax
d__Bacteria|p__Proteobacteria|c__Oligoflexia|o__Bacteriovoracales|f__Bacteriovoracaceae|g__Bacteriovorax	48	47	36	60	72	58	77	59	41	86	66	79	d__Bacteria	p__Proteobacteria	c__Oligoflexia	o__Bacteriovoracales	f__Bacteriovoracaceae	g__Bacteriovorax
d__Bacteria|p__Proteobacteria|c__Acidithiobacillia|o__Acidithiobacillales|f__Acidithiobacillaceae|g__Acidithiobacillus	459	441	307	396	393	344	481	360	328	455	362	510	d__Bacteria	p__Proteobacteria	c__Acidithiobacillia	o__Acidithiobacillales	f__Acidithiobacillaceae	g__Acidithiobacillus
d__Bacteria|p__Proteobacteria|c__Hydrogenophilalia|o__Hydrogenophilales|f__Hydrogenophilaceae|g__Hydrogenophilus	40	47	39	31	47	55	52	43	49	66	45	53	d__Bacteria	p__Proteobacteria	c__Hydrogenophilalia	o__Hydrogenophilales	f__Hydrogenophilaceae	g__Hydrogenophilus
d__Bacteria|p__Bacteroidetes|c__Bacteroidia|o__Bacteroidales|f__Prevotellaceae|g__Prevotella	172080	203155	210292	245488	264384	321201	390126	306244	236279	322508	310208	369790	d__Bacteria	p__Bacteroidetes	c__Bacteroidia	o__Bacteroidales	f__Prevotellaceae	g__Prevotella
d__Bacteria|p__Bacteroidetes|c__Bacteroidia|o__Bacteroidales|f__Bacteroidaceae|g__Bacteroides	40330	45331	53388	56233	55120	65065	79091	59268	46491	65338	71059	74171	d__Bacteria	p__Bacteroidetes	c__Bacteroidia	o__Bacteroidales	f__Bacteroidaceae	g__Bacteroides
d__Bacteria|p__Bacteroidetes|c__Bacteroidia|o__Bacteroidales|f__Tannerellaceae|g__Parabacteroides	9268	9785	9228	11369	10511	16080	15683	12493	9962	13040	12251	12593	d__Bacteria	p__Bacteroidetes	c__Bacteroidia	o__Bacteroidales	f__Tannerellaceae	g__Parabacteroides
d__Bacteria|p__Bacteroidetes|c__Bacteroidia|o__Bacteroidales|f__Tannerellaceae|g__Tannerella	8753	6488	6847	10222	8815	13811	8430	16151	10119	13713	16563	17252	d__Bacteria	p__Bacteroidetes	c__Bacteroidia	o__Bacteroidales	f__Tannerellaceae	g__Tannerella
d__Bacteria|p__Bacteroidetes|c__Bacteroidia|o__Bacteroidales|f__Rikenellaceae|g__Alistipes	11881	11293	10182	11153	12511	12641	14703	12115	9841	12291	10795	10659	d__Bacteria	p__Bacteroidetes	c__Bacteroidia	o__Bacteroidales	f__Rikenellaceae	g__Alistipes
d__Bacteria|p__Bacteroidetes|c__Bacteroidia|o__Bacteroidales|f__Rikenellaceae|g__Mucinivorans	463	402	370	512	510	843	647	579	421	590	687	788	d__Bacteria	p__Bacteroidetes	c__Bacteroidia	o__Bacteroidales	f__Rikenellaceae	g__Mucinivorans
d__Bacteria|p__Bacteroidetes|c__Bacteroidia|o__Bacteroidales|f__Muribaculaceae|g__Muribaculum	9801	10005	8763	11235	9340	13767	14653	9280	8237	10274	13266	15650	d__Bacteria	p__Bacteroidetes	c__Bacteroidia	o__Bacteroidales	f__Muribaculaceae	g__Muribaculum
d__Bacteria|p__Bacteroidetes|c__Bacteroidia|o__Bacteroidales|g__Candidatus Azobacteroides|s__Candidatus Azobacteroides pseudotrichonymphae	1600	2578	2600	4035	2892	4406	6827	3381	2622	4153	5396	7114	d__Bacteria	p__Bacteroidetes	c__Bacteroidia	o__Bacteroidales	g__Candidatus Azobacteroides	s__Candidatus Azobacteroides pseudotrichonymphae
d__Bacteria|p__Bacteroidetes|c__Bacteroidia|o__Bacteroidales|f__Porphyromonadaceae|g__Porphyromonas	4404	6332	5248	10436	6972	7716	8052	6430	6553	7925	12374	16738	d__Bacteria	p__Bacteroidetes	c__Bacteroidia	o__Bacteroidales	f__Porphyromonadaceae	g__Porphyromonas
d__Bacteria|p__Bacteroidetes|c__Bacteroidia|o__Bacteroidales|f__Porphyromonadaceae|g__Petrimonas	1233	1635	1344	2057	1671	2307	2225	1906	1683	2740	3582	2953	d__Bacteria	p__Bacteroidetes	c__Bacteroidia	o__Bacteroidales	f__Porphyromonadaceae	g__Petrimonas
d__Bacteria|p__Bacteroidetes|c__Bacteroidia|o__Bacteroidales|f__Porphyromonadaceae|g__Fermentimonas	199	234	204	311	333	237	276	226	240	271	346	352	d__Bacteria	p__Bacteroidetes	c__Bacteroidia	o__Bacteroidales	f__Porphyromonadaceae	g__Fermentimonas
d__Bacteria|p__Bacteroidetes|c__Bacteroidia|o__Bacteroidales|f__Barnesiellaceae|g__Barnesiella	3300	2970	2668	3494	3412	4392	4431	3338	2921	3667	3931	4158	d__Bacteria	p__Bacteroidetes	c__Bacteroidia	o__Bacteroidales	f__Barnesiellaceae	g__Barnesiella
d__Bacteria|p__Bacteroidetes|c__Bacteroidia|o__Bacteroidales|f__Paludibacteraceae|g__Paludibacter	1289	1376	1338	1895	1879	3073	2241	1682	1698	2131	2613	2779	d__Bacteria	p__Bacteroidetes	c__Bacteroidia	o__Bacteroidales	f__Paludibacteraceae	g__Paludibacter
d__Bacteria|p__Bacteroidetes|c__Bacteroidia|o__Bacteroidales|f__Odoribacteraceae|g__Odoribacter	762	737	764	848	1030	1199	1615	1273	829	1409	1127	1303	d__Bacteria	p__Bacteroidetes	c__Bacteroidia	o__Bacteroidales	f__Odoribacteraceae	g__Odoribacter
d__Bacteria|p__Bacteroidetes|c__Bacteroidia|o__Bacteroidales|f__Dysgonamonadaceae|g__Proteiniphilum	718	815	744	967	926	1131	1666	1261	918	1326	1185	1309	d__Bacteria	p__Bacteroidetes	c__Bacteroidia	o__Bacteroidales	f__Dysgonamonadaceae	g__Proteiniphilum
d__Bacteria|p__Bacteroidetes|c__Bacteroidia|o__Marinilabiliales|f__Prolixibacteraceae|g__Draconibacterium	1820	1578	1444	1722	1942	2993	3444	2607	1901	3363	2923	3047	d__Bacteria	p__Bacteroidetes	c__Bacteroidia	o__Marinilabiliales	f__Prolixibacteraceae	g__Draconibacterium
d__Bacteria|p__Bacteroidetes|c__Bacteroidia|o__Marinilabiliales|f__Marinilabiliaceae|g__Alkalitalea	1765	1883	1908	2304	2325	2843	2699	1755	1681	2086	2168	2013	d__Bacteria	p__Bacteroidetes	c__Bacteroidia	o__Marinilabiliales	f__Marinilabiliaceae	g__Alkalitalea
d__Bacteria|p__Bacteroidetes|c__Bacteroidia|o__Marinilabiliales|f__Salinivirgaceae|g__Salinivirga	504	506	455	607	652	671	740	651	584	671	812	863	d__Bacteria	p__Bacteroidetes	c__Bacteroidia	o__Marinilabiliales	f__Salinivirgaceae	g__Salinivirga
d__Bacteria|p__Bacteroidetes|c__Bacteroidia|o__Marinilabiliales|f__Marinifilaceae|s__Marinifilaceae bacterium SPP2	461	373	329	480	465	493	590	434	380	498	604	593	d__Bacteria	p__Bacteroidetes	c__Bacteroidia	o__Marinilabiliales	f__Marinifilaceae	s__Marinifilaceae bacterium SPP2
d__Bacteria|p__Bacteroidetes|c__Sphingobacteriia|o__Sphingobacteriales|f__Sphingobacteriaceae|g__Sphingobacterium	24713	10862	10656	9754	11905	11272	3733	6795	6713	4214	7098	4286	d__Bacteria	p__Bacteroidetes	c__Sphingobacteriia	o__Sphingobacteriales	f__Sphingobacteriaceae	g__Sphingobacterium
d__Bacteria|p__Bacteroidetes|c__Sphingobacteriia|o__Sphingobacteriales|f__Sphingobacteriaceae|g__Mucilaginibacter	2655	2656	2810	3153	3832	5131	4170	3321	2729	3795	3812	4763	d__Bacteria	p__Bacteroidetes	c__Sphingobacteriia	o__Sphingobacteriales	f__Sphingobacteriaceae	g__Mucilaginibacter
d__Bacteria|p__Bacteroidetes|c__Sphingobacteriia|o__Sphingobacteriales|f__Sphingobacteriaceae|g__Pedobacter	883	1083	1109	1259	1239	2313	1113	736	822	747	966	880	d__Bacteria	p__Bacteroidetes	c__Sphingobacteriia	o__Sphingobacteriales	f__Sphingobacteriaceae	g__Pedobacter
d__Bacteria|p__Bacteroidetes|c__Sphingobacteriia|o__Sphingobacteriales|f__Sphingobacteriaceae|s__Sphingobacteriaceae bacterium GW460-11-11-14-LB5	465	469	492	570	625	890	867	538	367	624	466	414	d__Bacteria	p__Bacteroidetes	c__Sphingobacteriia	o__Sphingobacteriales	f__Sphingobacteriaceae	s__Sphingobacteriaceae bacterium GW460-11-11-14-LB5
d__Bacteria|p__Bacteroidetes|c__Sphingobacteriia|o__Sphingobacteriales|f__Sphingobacteriaceae|g__Pseudopedobacter	272	406	430	543	467	1490	1847	1355	623	1432	1178	1730	d__Bacteria	p__Bacteroidetes	c__Sphingobacteriia	o__Sphingobacteriales	f__Sphingobacteriaceae	g__Pseudopedobacter
d__Bacteria|p__Bacteroidetes|c__Sphingobacteriia|o__Sphingobacteriales|f__Sphingobacteriaceae|g__Solitalea	136	180	153	202	195	260	262	218	173	298	246	318	d__Bacteria	p__Bacteroidetes	c__Sphingobacteriia	o__Sphingobacteriales	f__Sphingobacteriaceae	g__Solitalea
d__Bacteria|p__Bacteroidetes|c__Flavobacteriia|o__Flavobacteriales|f__Flavobacteriaceae|g__Capnocytophaga	2994	2892	2383	3739	3684	3684	3958	3506	3157	4098	4308	4829	d__Bacteria	p__Bacteroidetes	c__Flavobacteriia	o__Flavobacteriales	f__Flavobacteriaceae	g__Capnocytophaga
d__Bacteria|p__Bacteroidetes|c__Flavobacteriia|o__Flavobacteriales|f__Flavobacteriaceae|g__Flavobacterium	2329	2523	2228	3283	3359	3597	4038	3365	3054	3972	4248	4660	d__Bacteria	p__Bacteroidetes	c__Flavobacteriia	o__Flavobacteriales	f__Flavobacteriaceae	g__Flavobacterium
d__Bacteria|p__Bacteroidetes|c__Flavobacteriia|o__Flavobacteriales|f__Flavobacteriaceae|g__Chryseobacterium	1921	1913	1756	2386	2741	2685	2758	2559	2357	2993	3082	3170	d__Bacteria	p__Bacteroidetes	c__Flavobacteriia	o__Flavobacteriales	f__Flavobacteriaceae	g__Chryseobacterium
d__Bacteria|p__Bacteroidetes|c__Flavobacteriia|o__Flavobacteriales|f__Flavobacteriaceae|g__Muricauda	1700	2729	2577	3449	2311	2299	2037	1582	1257	1571	1805	1963	d__Bacteria	p__Bacteroidetes	c__Flavobacteriia	o__Flavobacteriales	f__Flavobacteriaceae	g__Muricauda
d__Bacteria|p__Bacteroidetes|c__Flavobacteriia|o__Flavobacteriales|f__Flavobacteriaceae|g__Nonlabens	969	992	812	1288	1282	925	941	970	1091	1074	1392	1185	d__Bacteria	p__Bacteroidetes	c__Flavobacteriia	o__Flavobacteriales	f__Flavobacteriaceae	g__Nonlabens
d__Bacteria|p__Bacteroidetes|c__Flavobacteriia|o__Flavobacteriales|f__Flavobacteriaceae|g__Winogradskyella	928	1058	1209	1240	1612	1499	2394	1675	844	1584	1023	1061	d__Bacteria	p__Bacteroidetes	c__Flavobacteriia	o__Flavobacteriales	f__Flavobacteriaceae	g__Winogradskyella
d__Bacteria|p__Bacteroidetes|c__Flavobacteriia|o__Flavobacteriales|f__Flavobacteriaceae|g__Elizabethkingia	712	725	610	920	991	923	1136	849	787	1184	1214	1681	d__Bacteria	p__Bacteroidetes	c__Flavobacteriia	o__Flavobacteriales	f__Flavobacteriaceae	g__Elizabethkingia
d__Bacteria|p__Bacteroidetes|c__Flavobacteriia|o__Flavobacteriales|f__Flavobacteriaceae|s__Flavobacteriaceae bacterium UJ101	333	269	250	411	328	346	256	306	322	353	423	288	d__Bacteria	p__Bacteroidetes	c__Flavobacteriia	o__Flavobacteriales	f__Flavobacteriaceae	s__Flavobacteriaceae bacterium UJ101
d__Bacteria|p__Bacteroidetes|c__Flavobacteriia|o__Flavobacteriales|f__Flavobacteriaceae|s__Flavobacteriaceae bacterium 3519-10	237	189	221	287	298	258	313	266	260	232	285	229	d__Bacteria	p__Bacteroidetes	c__Flavobacteriia	o__Flavobacteriales	f__Flavobacteriaceae	s__Flavobacteriaceae bacterium 3519-10
d__Bacteria|p__Bacteroidetes|c__Flavobacteriia|o__Flavobacteriales|f__Flavobacteriaceae|s__Flavobacteriaceae bacterium MAR_2010_188	76	127	96	124	121	132	158	119	117	197	208	204	d__Bacteria	p__Bacteroidetes	c__Flavobacteriia	o__Flavobacteriales	f__Flavobacteriaceae	s__Flavobacteriaceae bacterium MAR_2010_188
d__Bacteria|p__Bacteroidetes|c__Flavobacteriia|o__Flavobacteriales|f__Flavobacteriaceae|s__Flavobacteriaceae bacterium	59	59	49	69	61	84	74	57	59	73	85	70	d__Bacteria	p__Bacteroidetes	c__Flavobacteriia	o__Flavobacteriales	f__Flavobacteriaceae	s__Flavobacteriaceae bacterium
d__Bacteria|p__Bacteroidetes|c__Flavobacteriia|o__Flavobacteriales|f__Flavobacteriaceae|g__Polaribacter	609	683	615	891	996	780	905	667	771	830	963	1014	d__Bacteria	p__Bacteroidetes	c__Flavobacteriia	o__Flavobacteriales	f__Flavobacteriaceae	g__Polaribacter
d__Bacteria|p__Bacteroidetes|c__Flavobacteriia|o__Flavobacteriales|f__Flavobacteriaceae|g__Myroides	565	524	421	565	577	560	511	452	458	541	652	673	d__Bacteria	p__Bacteroidetes	c__Flavobacteriia	o__Flavobacteriales	f__Flavobacteriaceae	g__Myroides
d__Bacteria|p__Bacteroidetes|c__Flavobacteriia|o__Flavobacteriales|f__Flavobacteriaceae|g__Maribacter	517	545	507	688	714	598	1042	581	480	736	745	984	d__Bacteria	p__Bacteroidetes	c__Flavobacteriia	o__Flavobacteriales	f__Flavobacteriaceae	g__Maribacter
d__Bacteria|p__Bacteroidetes|c__Flavobacteriia|o__Flavobacteriales|f__Flavobacteriaceae|g__Robiginitalea	511	560	464	614	604	784	1620	904	599	1001	752	893	d__Bacteria	p__Bacteroidetes	c__Flavobacteriia	o__Flavobacteriales	f__Flavobacteriaceae	g__Robiginitalea
d__Bacteria|p__Bacteroidetes|c__Flavobacteriia|o__Flavobacteriales|f__Flavobacteriaceae|g__Gramella	499	619	554	770	729	815	696	572	568	664	676	868	d__Bacteria	p__Bacteroidetes	c__Flavobacteriia	o__Flavobacteriales	f__Flavobacteriaceae	g__Gramella
d__Bacteria|p__Bacteroidetes|c__Flavobacteriia|o__Flavobacteriales|f__Flavobacteriaceae|g__Formosa	497	568	482	797	831	330	344	299	420	341	544	453	d__Bacteria	p__Bacteroidetes	c__Flavobacteriia	o__Flavobacteriales	f__Flavobacteriaceae	g__Formosa
d__Bacteria|p__Bacteroidetes|c__Flavobacteriia|o__Flavobacteriales|f__Flavobacteriaceae|g__Gilvibacter	395	231	211	292	326	215	131	186	207	202	290	178	d__Bacteria	p__Bacteroidetes	c__Flavobacteriia	o__Flavobacteriales	f__Flavobacteriaceae	g__Gilvibacter
d__Bacteria|p__Bacteroidetes|c__Flavobacteriia|o__Flavobacteriales|f__Flavobacteriaceae|g__Olleya	353	226	195	243	275	316	393	294	194	283	266	334	d__Bacteria	p__Bacteroidetes	c__Flavobacteriia	o__Flavobacteriales	f__Flavobacteriaceae	g__Olleya
d__Bacteria|p__Bacteroidetes|c__Flavobacteriia|o__Flavobacteriales|f__Flavobacteriaceae|g__Tenacibaculum	318	295	232	352	348	479	544	382	321	430	379	464	d__Bacteria	p__Bacteroidetes	c__Flavobacteriia	o__Flavobacteriales	f__Flavobacteriaceae	g__Tenacibaculum
d__Bacteria|p__Bacteroidetes|c__Flavobacteriia|o__Flavobacteriales|f__Flavobacteriaceae|g__Cellulophaga	301	270	263	359	347	357	370	268	293	342	409	455	d__Bacteria	p__Bacteroidetes	c__Flavobacteriia	o__Flavobacteriales	f__Flavobacteriaceae	g__Cellulophaga
d__Bacteria|p__Bacteroidetes|c__Flavobacteriia|o__Flavobacteriales|f__Flavobacteriaceae|g__Dokdonia	298	365	289	460	462	399	364	352	383	378	521	479	d__Bacteria	p__Bacteroidetes	c__Flavobacteriia	o__Flavobacteriales	f__Flavobacteriaceae	g__Dokdonia
d__Bacteria|p__Bacteroidetes|c__Flavobacteriia|o__Flavobacteriales|f__Flavobacteriaceae|g__Zobellia	293	283	264	300	322	307	1228	492	261	606	450	837	d__Bacteria	p__Bacteroidetes	c__Flavobacteriia	o__Flavobacteriales	f__Flavobacteriaceae	g__Zobellia
d__Bacteria|p__Bacteroidetes|c__Flavobacteriia|o__Flavobacteriales|f__Flavobacteriaceae|g__Salegentibacter	291	150	135	184	213	211	204	173	151	178	222	150	d__Bacteria	p__Bacteroidetes	c__Flavobacteriia	o__Flavobacteriales	f__Flavobacteriaceae	g__Salegentibacter
d__Bacteria|p__Bacteroidetes|c__Flavobacteriia|o__Flavobacteriales|f__Flavobacteriaceae|g__Algibacter	257	139	176	332	269	226	346	205	299	222	327	318	d__Bacteria	p__Bacteroidetes	c__Flavobacteriia	o__Flavobacteriales	f__Flavobacteriaceae	g__Algibacter
d__Bacteria|p__Bacteroidetes|c__Flavobacteriia|o__Flavobacteriales|f__Flavobacteriaceae|g__Ornithobacterium	230	230	184	309	316	374	466	288	235	389	425	428	d__Bacteria	p__Bacteroidetes	c__Flavobacteriia	o__Flavobacteriales	f__Flavobacteriaceae	g__Ornithobacterium
d__Bacteria|p__Bacteroidetes|c__Flavobacteriia|o__Flavobacteriales|f__Flavobacteriaceae|g__Riemerella	220	258	216	292	289	351	228	191	218	275	378	397	d__Bacteria	p__Bacteroidetes	c__Flavobacteriia	o__Flavobacteriales	f__Flavobacteriaceae	g__Riemerella
d__Bacteria|p__Bacteroidetes|c__Flavobacteriia|o__Flavobacteriales|f__Flavobacteriaceae|g__Aquimarina	219	269	264	358	395	362	424	388	385	460	469	588	d__Bacteria	p__Bacteroidetes	c__Flavobacteriia	o__Flavobacteriales	f__Flavobacteriaceae	g__Aquimarina
d__Bacteria|p__Bacteroidetes|c__Flavobacteriia|o__Flavobacteriales|f__Flavobacteriaceae|g__Weeksella	209	254	204	305	336	85	57	64	94	54	91	99	d__Bacteria	p__Bacteroidetes	c__Flavobacteriia	o__Flavobacteriales	f__Flavobacteriaceae	g__Weeksella
d__Bacteria|p__Bacteroidetes|c__Flavobacteriia|o__Flavobacteriales|f__Flavobacteriaceae|g__Aequorivita	207	181	168	243	324	211	309	208	192	240	244	242	d__Bacteria	p__Bacteroidetes	c__Flavobacteriia	o__Flavobacteriales	f__Flavobacteriaceae	g__Aequorivita
d__Bacteria|p__Bacteroidetes|c__Flavobacteriia|o__Flavobacteriales|f__Flavobacteriaceae|g__Wenyingzhuangia	200	226	182	259	303	162	185	147	193	178	202	175	d__Bacteria	p__Bacteroidetes	c__Flavobacteriia	o__Flavobacteriales	f__Flavobacteriaceae	g__Wenyingzhuangia
d__Bacteria|p__Bacteroidetes|c__Flavobacteriia|o__Flavobacteriales|f__Flavobacteriaceae|g__Lacinutrix	189	185	171	234	276	245	259	208	199	248	227	247	d__Bacteria	p__Bacteroidetes	c__Flavobacteriia	o__Flavobacteriales	f__Flavobacteriaceae	g__Lacinutrix
d__Bacteria|p__Bacteroidetes|c__Flavobacteriia|o__Flavobacteriales|f__Flavobacteriaceae|g__Gillisia	158	190	171	272	217	202	174	152	121	175	234	273	d__Bacteria	p__Bacteroidetes	c__Flavobacteriia	o__Flavobacteriales	f__Flavobacteriaceae	g__Gillisia
d__Bacteria|p__Bacteroidetes|c__Flavobacteriia|o__Flavobacteriales|f__Flavobacteriaceae|g__Croceibacter	155	144	129	211	162	335	196	267	173	298	206	309	d__Bacteria	p__Bacteroidetes	c__Flavobacteriia	o__Flavobacteriales	f__Flavobacteriaceae	g__Croceibacter
d__Bacteria|p__Bacteroidetes|c__Flavobacteriia|o__Flavobacteriales|f__Flavobacteriaceae|g__Flavivirga	149	177	106	124	151	97	83	100	133	122	154	137	d__Bacteria	p__Bacteroidetes	c__Flavobacteriia	o__Flavobacteriales	f__Flavobacteriaceae	g__Flavivirga
d__Bacteria|p__Bacteroidetes|c__Flavobacteriia|o__Flavobacteriales|f__Flavobacteriaceae|g__Zunongwangia	140	142	104	197	190	119	157	139	111	159	172	177	d__Bacteria	p__Bacteroidetes	c__Flavobacteriia	o__Flavobacteriales	f__Flavobacteriaceae	g__Zunongwangia
d__Bacteria|p__Bacteroidetes|c__Flavobacteriia|o__Flavobacteriales|f__Flavobacteriaceae|g__Kordia	139	152	106	133	185	57	48	57	88	41	63	59	d__Bacteria	p__Bacteroidetes	c__Flavobacteriia	o__Flavobacteriales	f__Flavobacteriaceae	g__Kordia
d__Bacteria|p__Bacteroidetes|c__Flavobacteriia|o__Flavobacteriales|f__Flavobacteriaceae|g__Lutibacter	129	127	108	149	157	166	137	138	150	185	178	194	d__Bacteria	p__Bacteroidetes	c__Flavobacteriia	o__Flavobacteriales	f__Flavobacteriaceae	g__Lutibacter
d__Bacteria|p__Bacteroidetes|c__Flavobacteriia|o__Flavobacteriales|f__Flavobacteriaceae|g__Tamlana	107	106	85	131	154	144	226	147	115	155	214	243	d__Bacteria	p__Bacteroidetes	c__Flavobacteriia	o__Flavobacteriales	f__Flavobacteriaceae	g__Tamlana
d__Bacteria|p__Bacteroidetes|c__Flavobacteriia|o__Flavobacteriales|f__Flavobacteriaceae|g__Aureitalea	102	95	79	129	101	140	119	80	92	125	132	126	d__Bacteria	p__Bacteroidetes	c__Flavobacteriia	o__Flavobacteriales	f__Flavobacteriaceae	g__Aureitalea
d__Bacteria|p__Bacteroidetes|c__Flavobacteriia|o__Flavobacteriales|f__Flavobacteriaceae|g__Seonamhaeicola	79	85	80	75	116	86	143	74	111	74	119	103	d__Bacteria	p__Bacteroidetes	c__Flavobacteriia	o__Flavobacteriales	f__Flavobacteriaceae	g__Seonamhaeicola
d__Bacteria|p__Bacteroidetes|c__Flavobacteriia|o__Flavobacteriales|f__Flavobacteriaceae|g__Psychroflexus	75	71	55	59	69	72	71	60	59	87	69	65	d__Bacteria	p__Bacteroidetes	c__Flavobacteriia	o__Flavobacteriales	f__Flavobacteriaceae	g__Psychroflexus
d__Bacteria|p__Bacteroidetes|c__Flavobacteriia|o__Flavobacteriales|f__Flavobacteriaceae|g__Arenibacter	72	99	99	124	160	512	247	207	187	326	320	446	d__Bacteria	p__Bacteroidetes	c__Flavobacteriia	o__Flavobacteriales	f__Flavobacteriaceae	g__Arenibacter
d__Bacteria|p__Bacteroidetes|c__Flavobacteriia|o__Flavobacteriales|f__Flavobacteriaceae|g__Mariniflexile	59	45	37	67	84	69	110	82	52	95	105	119	d__Bacteria	p__Bacteroidetes	c__Flavobacteriia	o__Flavobacteriales	f__Flavobacteriaceae	g__Mariniflexile
d__Bacteria|p__Bacteroidetes|c__Flavobacteriia|o__Flavobacteriales|f__Flavobacteriaceae|g__Sediminicola	42	49	46	66	49	103	103	95	71	120	69	108	d__Bacteria	p__Bacteroidetes	c__Flavobacteriia	o__Flavobacteriales	f__Flavobacteriaceae	g__Sediminicola
d__Bacteria|p__Bacteroidetes|c__Flavobacteriia|o__Flavobacteriales|f__Flavobacteriaceae|g__Flagellimonas	42	46	39	61	46	68	71	46	34	62	87	79	d__Bacteria	p__Bacteroidetes	c__Flavobacteriia	o__Flavobacteriales	f__Flavobacteriaceae	g__Flagellimonas
d__Bacteria|p__Bacteroidetes|c__Flavobacteriia|o__Flavobacteriales|f__Flavobacteriaceae|g__Siansivirga	38	25	36	54	44	37	42	46	40	78	42	38	d__Bacteria	p__Bacteroidetes	c__Flavobacteriia	o__Flavobacteriales	f__Flavobacteriaceae	g__Siansivirga
d__Bacteria|p__Bacteroidetes|c__Flavobacteriia|o__Flavobacteriales|f__Crocinitomicaceae|g__Fluviicola	255	386	432	494	343	548	494	344	265	482	424	603	d__Bacteria	p__Bacteroidetes	c__Flavobacteriia	o__Flavobacteriales	f__Crocinitomicaceae	g__Fluviicola
d__Bacteria|p__Bacteroidetes|c__Flavobacteriia|o__Flavobacteriales|g__Candidatus Sulcia|s__Candidatus Sulcia muelleri	194	177	153	170	261	228	243	223	214	231	215	225	d__Bacteria	p__Bacteroidetes	c__Flavobacteriia	o__Flavobacteriales	g__Candidatus Sulcia	s__Candidatus Sulcia muelleri
d__Bacteria|p__Bacteroidetes|c__Flavobacteriia|o__Flavobacteriales|g__Candidatus Walczuchella|s__Candidatus Walczuchella monophlebidarum	41	45	31	50	58	66	75	55	34	61	49	49	d__Bacteria	p__Bacteroidetes	c__Flavobacteriia	o__Flavobacteriales	g__Candidatus Walczuchella	s__Candidatus Walczuchella monophlebidarum
d__Bacteria|p__Bacteroidetes|c__Flavobacteriia|o__Flavobacteriales|f__Blattabacteriaceae|g__Blattabacterium	226	271	214	344	302	345	323	268	272	309	348	386	d__Bacteria	p__Bacteroidetes	c__Flavobacteriia	o__Flavobacteriales	f__Blattabacteriaceae	g__Blattabacterium
d__Bacteria|p__Bacteroidetes|c__Flavobacteriia|o__Flavobacteriales|f__Ichthyobacteriaceae|g__Ichthyobacterium	120	132	102	134	161	151	122	188	164	180	149	113	d__Bacteria	p__Bacteroidetes	c__Flavobacteriia	o__Flavobacteriales	f__Ichthyobacteriaceae	g__Ichthyobacterium
d__Bacteria|p__Bacteroidetes|c__Flavobacteriia|o__Flavobacteriales|f__Cryomorphaceae|g__Owenweeksia	116	127	100	158	155	130	157	120	109	136	137	158	d__Bacteria	p__Bacteroidetes	c__Flavobacteriia	o__Flavobacteriales	f__Cryomorphaceae	g__Owenweeksia
d__Bacteria|p__Bacteroidetes|c__Cytophagia|o__Cytophagales|f__Hymenobacteraceae|g__Hymenobacter	7189	7956	6676	8254	8782	7111	8119	6788	6789	6859	7499	7023	d__Bacteria	p__Bacteroidetes	c__Cytophagia	o__Cytophagales	f__Hymenobacteraceae	g__Hymenobacter
d__Bacteria|p__Bacteroidetes|c__Cytophagia|o__Cytophagales|f__Hymenobacteraceae|g__Pontibacter	2530	4118	3107	6189	3128	2196	1603	1603	2351	1826	4262	4024	d__Bacteria	p__Bacteroidetes	c__Cytophagia	o__Cytophagales	f__Hymenobacteraceae	g__Pontibacter
d__Bacteria|p__Bacteroidetes|c__Cytophagia|o__Cytophagales|f__Hymenobacteraceae|g__Rufibacter	1321	1610	1772	2036	1496	2148	1419	1212	1150	1306	1544	1641	d__Bacteria	p__Bacteroidetes	c__Cytophagia	o__Cytophagales	f__Hymenobacteraceae	g__Rufibacter
d__Bacteria|p__Bacteroidetes|c__Cytophagia|o__Cytophagales|f__Cytophagaceae|g__Spirosoma	2851	2731	2180	2507	2990	4316	3962	2904	2568	3572	3338	3296	d__Bacteria	p__Bacteroidetes	c__Cytophagia	o__Cytophagales	f__Cytophagaceae	g__Spirosoma
d__Bacteria|p__Bacteroidetes|c__Cytophagia|o__Cytophagales|f__Cytophagaceae|g__Runella	872	1108	971	1610	1153	3158	2462	1121	1009	1394	2012	2304	d__Bacteria	p__Bacteroidetes	c__Cytophagia	o__Cytophagales	f__Cytophagaceae	g__Runella
d__Bacteria|p__Bacteroidetes|c__Cytophagia|o__Cytophagales|f__Cytophagaceae|g__Fibrella	719	1048	773	1685	880	935	1014	791	861	964	1449	1928	d__Bacteria	p__Bacteroidetes	c__Cytophagia	o__Cytophagales	f__Cytophagaceae	g__Fibrella
d__Bacteria|p__Bacteroidetes|c__Cytophagia|o__Cytophagales|f__Cytophagaceae|g__Dyadobacter	358	423	365	528	427	438	376	323	297	364	435	549	d__Bacteria	p__Bacteroidetes	c__Cytophagia	o__Cytophagales	f__Cytophagaceae	g__Dyadobacter
d__Bacteria|p__Bacteroidetes|c__Cytophagia|o__Cytophagales|f__Cytophagaceae|g__Leadbetterella	191	175	166	184	212	257	371	206	195	263	300	281	d__Bacteria	p__Bacteroidetes	c__Cytophagia	o__Cytophagales	f__Cytophagaceae	g__Leadbetterella
d__Bacteria|p__Bacteroidetes|c__Cytophagia|o__Cytophagales|f__Cytophagaceae|g__Pseudarcicella	72	87	102	129	136	138	107	123	122	139	154	126	d__Bacteria	p__Bacteroidetes	c__Cytophagia	o__Cytophagales	f__Cytophagaceae	g__Pseudarcicella
d__Bacteria|p__Bacteroidetes|c__Cytophagia|o__Cytophagales|f__Cytophagaceae|g__Cytophaga	63	61	81	91	92	116	133	104	110	155	138	176	d__Bacteria	p__Bacteroidetes	c__Cytophagia	o__Cytophagales	f__Cytophagaceae	g__Cytophaga
d__Bacteria|p__Bacteroidetes|c__Cytophagia|o__Cytophagales|f__Cytophagaceae|g__Arcticibacterium	50	55	58	86	78	146	160	82	60	104	91	119	d__Bacteria	p__Bacteroidetes	c__Cytophagia	o__Cytophagales	f__Cytophagaceae	g__Arcticibacterium
d__Bacteria|p__Bacteroidetes|c__Cytophagia|o__Cytophagales|f__Cyclobacteriaceae|g__Echinicola	1086	778	790	1056	844	755	637	637	508	599	622	952	d__Bacteria	p__Bacteroidetes	c__Cytophagia	o__Cytophagales	f__Cyclobacteriaceae	g__Echinicola
d__Bacteria|p__Bacteroidetes|c__Cytophagia|o__Cytophagales|f__Cyclobacteriaceae|g__Aquiflexum	988	2190	1915	4243	1479	2069	231	297	622	261	1827	811	d__Bacteria	p__Bacteroidetes	c__Cytophagia	o__Cytophagales	f__Cyclobacteriaceae	g__Aquiflexum
d__Bacteria|p__Bacteroidetes|c__Cytophagia|o__Cytophagales|f__Cyclobacteriaceae|g__Algoriphagus	897	1435	1524	1727	990	2896	1142	660	522	657	1010	1176	d__Bacteria	p__Bacteroidetes	c__Cytophagia	o__Cytophagales	f__Cyclobacteriaceae	g__Algoriphagus
d__Bacteria|p__Bacteroidetes|c__Cytophagia|o__Cytophagales|f__Cyclobacteriaceae|g__Cyclobacterium	294	532	438	711	514	602	567	545	431	675	711	920	d__Bacteria	p__Bacteroidetes	c__Cytophagia	o__Cytophagales	f__Cyclobacteriaceae	g__Cyclobacterium
d__Bacteria|p__Bacteroidetes|c__Cytophagia|o__Cytophagales|f__Cyclobacteriaceae|g__Belliella	185	289	270	289	252	557	337	272	268	390	414	447	d__Bacteria	p__Bacteroidetes	c__Cytophagia	o__Cytophagales	f__Cyclobacteriaceae	g__Belliella
d__Bacteria|p__Bacteroidetes|c__Cytophagia|o__Cytophagales|f__Persicobacteraceae|g__Persicobacter	1327	839	929	1138	1294	1023	717	589	714	524	953	915	d__Bacteria	p__Bacteroidetes	c__Cytophagia	o__Cytophagales	f__Persicobacteraceae	g__Persicobacter
d__Bacteria|p__Bacteroidetes|c__Cytophagia|o__Cytophagales|g__Chryseolinea|s__Chryseolinea sp. KIS68-18	877	778	694	831	898	963	1249	1037	924	1082	985	984	d__Bacteria	p__Bacteroidetes	c__Cytophagia	o__Cytophagales	g__Chryseolinea	s__Chryseolinea sp. KIS68-18
d__Bacteria|p__Bacteroidetes|c__Cytophagia|o__Cytophagales|f__Amoebophilaceae|g__Candidatus Cardinium	434	634	516	625	869	636	1037	682	535	551	636	579	d__Bacteria	p__Bacteroidetes	c__Cytophagia	o__Cytophagales	f__Amoebophilaceae	g__Candidatus Cardinium
d__Bacteria|p__Bacteroidetes|c__Cytophagia|o__Cytophagales|f__Amoebophilaceae|g__Candidatus Amoebophilus	420	678	728	628	553	1061	576	351	267	477	446	681	d__Bacteria	p__Bacteroidetes	c__Cytophagia	o__Cytophagales	f__Amoebophilaceae	g__Candidatus Amoebophilus
d__Bacteria|p__Bacteroidetes|c__Cytophagia|o__Cytophagales|f__Flammeovirgaceae|g__Flammeovirga	393	465	400	487	462	367	270	350	373	327	459	382	d__Bacteria	p__Bacteroidetes	c__Cytophagia	o__Cytophagales	f__Flammeovirgaceae	g__Flammeovirga
d__Bacteria|p__Bacteroidetes|c__Cytophagia|o__Cytophagales|f__Flammeovirgaceae|s__Flammeovirgaceae bacterium 311	221	265	232	296	342	317	377	391	300	480	427	486	d__Bacteria	p__Bacteroidetes	c__Cytophagia	o__Cytophagales	f__Flammeovirgaceae	s__Flammeovirgaceae bacterium 311
d__Bacteria|p__Bacteroidetes|c__Cytophagia|o__Cytophagales|f__Flammeovirgaceae|g__Marivirga	76	94	87	124	109	147	173	143	97	161	132	131	d__Bacteria	p__Bacteroidetes	c__Cytophagia	o__Cytophagales	f__Flammeovirgaceae	g__Marivirga
d__Bacteria|p__Bacteroidetes|c__Cytophagia|o__Cytophagales|f__Bernardetiaceae|g__Bernardetia	78	96	109	98	145	179	248	192	136	259	148	236	d__Bacteria	p__Bacteroidetes	c__Cytophagia	o__Cytophagales	f__Bernardetiaceae	g__Bernardetia
d__Bacteria|p__Bacteroidetes|c__Chitinophagia|o__Chitinophagales|f__Chitinophagaceae|g__Chitinophaga	1630	1694	1426	2353	2373	2071	2598	2017	1900	2407	2489	2690	d__Bacteria	p__Bacteroidetes	c__Chitinophagia	o__Chitinophagales	f__Chitinophagaceae	g__Chitinophaga
d__Bacteria|p__Bacteroidetes|c__Chitinophagia|o__Chitinophagales|f__Chitinophagaceae|g__Filimonas	908	804	847	785	1192	1607	1690	1508	807	1267	1103	916	d__Bacteria	p__Bacteroidetes	c__Chitinophagia	o__Chitinophagales	f__Chitinophagaceae	g__Filimonas
d__Bacteria|p__Bacteroidetes|c__Chitinophagia|o__Chitinophagales|f__Chitinophagaceae|g__Niabella	653	787	663	1696	645	965	397	440	611	614	2312	2416	d__Bacteria	p__Bacteroidetes	c__Chitinophagia	o__Chitinophagales	f__Chitinophagaceae	g__Niabella
d__Bacteria|p__Bacteroidetes|c__Chitinophagia|o__Chitinophagales|f__Chitinophagaceae|g__Flavisolibacter	409	361	354	435	469	416	451	352	363	436	367	364	d__Bacteria	p__Bacteroidetes	c__Chitinophagia	o__Chitinophagales	f__Chitinophagaceae	g__Flavisolibacter
d__Bacteria|p__Bacteroidetes|c__Chitinophagia|o__Chitinophagales|f__Chitinophagaceae|g__Pseudoflavitalea	277	295	267	369	461	416	567	496	393	601	572	682	d__Bacteria	p__Bacteroidetes	c__Chitinophagia	o__Chitinophagales	f__Chitinophagaceae	g__Pseudoflavitalea
d__Bacteria|p__Bacteroidetes|c__Chitinophagia|o__Chitinophagales|f__Chitinophagaceae|g__Niastella	231	202	169	266	278	326	388	307	230	368	353	488	d__Bacteria	p__Bacteroidetes	c__Chitinophagia	o__Chitinophagales	f__Chitinophagaceae	g__Niastella
d__Bacteria|p__Bacteroidetes|c__Chitinophagia|o__Chitinophagales|f__Chitinophagaceae|g__Arachidicoccus	175	217	187	227	257	293	347	262	214	281	285	380	d__Bacteria	p__Bacteroidetes	c__Chitinophagia	o__Chitinophagales	f__Chitinophagaceae	g__Arachidicoccus
d__Bacteria|p__Bacteroidetes|o__Bacteroidetes Order II. Incertae sedis|f__Rhodothermaceae|g__Rhodothermus|s__Rhodothermus marinus	619	663	573	673	640	592	563	613	495	587	689	712	d__Bacteria	p__Bacteroidetes	o__Bacteroidetes Order II. Incertae sedis	f__Rhodothermaceae	g__Rhodothermus	s__Rhodothermus marinus
d__Bacteria|p__Bacteroidetes|o__Bacteroidetes Order II. Incertae sedis|f__Rhodothermaceae|g__Salinibacter|s__Salinibacter ruber	458	447	349	485	447	379	422	436	381	454	412	519	d__Bacteria	p__Bacteroidetes	o__Bacteroidetes Order II. Incertae sedis	f__Rhodothermaceae	g__Salinibacter	s__Salinibacter ruber
d__Bacteria|p__Bacteroidetes|c__Saprospiria|o__Saprospirales|f__Saprospiraceae|g__Saprospira	330	578	588	859	402	1039	460	324	312	347	512	516	d__Bacteria	p__Bacteroidetes	c__Saprospiria	o__Saprospirales	f__Saprospiraceae	g__Saprospira
d__Bacteria|p__Bacteroidetes|c__Saprospiria|o__Saprospirales|f__Haliscomenobacteraceae|g__Haliscomenobacter	232	191	178	205	214	292	276	245	198	267	294	290	d__Bacteria	p__Bacteroidetes	c__Saprospiria	o__Saprospirales	f__Haliscomenobacteraceae	g__Haliscomenobacter
d__Bacteria|p__Chlorobi|c__Chlorobia|o__Chlorobiales|f__Chlorobiaceae|g__Prosthecochloris	1674	1960	1538	1495	1877	1281	1857	1290	1136	1406	970	1239	d__Bacteria	p__Chlorobi	c__Chlorobia	o__Chlorobiales	f__Chlorobiaceae	g__Prosthecochloris
d__Bacteria|p__Chlorobi|c__Chlorobia|o__Chlorobiales|f__Chlorobiaceae|g__Chlorobaculum	1376	2172	1517	1762	1875	1403	1461	1394	1626	1536	1551	1862	d__Bacteria	p__Chlorobi	c__Chlorobia	o__Chlorobiales	f__Chlorobiaceae	g__Chlorobaculum
d__Bacteria|p__Chlorobi|c__Chlorobia|o__Chlorobiales|f__Chlorobiaceae|g__Pelodictyon	599	753	647	787	797	736	958	804	681	912	847	1102	d__Bacteria	p__Chlorobi	c__Chlorobia	o__Chlorobiales	f__Chlorobiaceae	g__Pelodictyon
d__Bacteria|p__Chlorobi|c__Chlorobia|o__Chlorobiales|f__Chlorobiaceae|g__Chlorobium	463	499	424	477	579	495	628	561	431	578	534	524	d__Bacteria	p__Chlorobi	c__Chlorobia	o__Chlorobiales	f__Chlorobiaceae	g__Chlorobium
d__Bacteria|p__Chlorobi|c__Chlorobia|o__Chlorobiales|f__Chlorobiaceae|g__Chloroherpeton	91	106	73	113	114	114	180	136	112	152	91	111	d__Bacteria	p__Chlorobi	c__Chlorobia	o__Chlorobiales	f__Chlorobiaceae	g__Chloroherpeton
d__Bacteria|p__Ignavibacteriae|c__Ignavibacteria|o__Ignavibacteriales|f__Melioribacteraceae|g__Melioribacter	187	187	179	196	213	211	151	147	149	176	140	184	d__Bacteria	p__Ignavibacteriae	c__Ignavibacteria	o__Ignavibacteriales	f__Melioribacteraceae	g__Melioribacter
d__Bacteria|p__Ignavibacteriae|c__Ignavibacteria|o__Ignavibacteriales|f__Ignavibacteriaceae|g__Ignavibacterium	171	261	225	394	333	649	835	505	292	741	503	977	d__Bacteria	p__Ignavibacteriae	c__Ignavibacteria	o__Ignavibacteriales	f__Ignavibacteriaceae	g__Ignavibacterium
d__Bacteria|p__Fibrobacteres|c__Fibrobacteria|o__Fibrobacterales|f__Fibrobacteraceae|g__Fibrobacter	128747	135713	121653	184688	198454	325749	539317	373115	274950	432589	337252	474018	d__Bacteria	p__Fibrobacteres	c__Fibrobacteria	o__Fibrobacterales	f__Fibrobacteraceae	g__Fibrobacter
d__Bacteria|p__Gemmatimonadetes|c__Gemmatimonadetes|o__Gemmatimonadales|f__Gemmatimonadaceae|g__Gemmatimonas	320	413	354	362	357	347	315	288	331	301	316	303	d__Bacteria	p__Gemmatimonadetes	c__Gemmatimonadetes	o__Gemmatimonadales	f__Gemmatimonadaceae	g__Gemmatimonas
d__Bacteria|p__Gemmatimonadetes|c__Gemmatimonadetes|o__Gemmatimonadales|f__Gemmatimonadaceae|g__Gemmatirosa	265	318	247	279	271	225	292	228	253	292	266	313	d__Bacteria	p__Gemmatimonadetes	c__Gemmatimonadetes	o__Gemmatimonadales	f__Gemmatimonadaceae	g__Gemmatirosa
d__Bacteria|p__Spirochaetes|c__Spirochaetia|o__Spirochaetales|f__Spirochaetaceae|g__Sphaerochaeta	18680	15422	15520	10300	12885	14629	9963	11522	10167	9516	10255	9241	d__Bacteria	p__Spirochaetes	c__Spirochaetia	o__Spirochaetales	f__Spirochaetaceae	g__Sphaerochaeta
d__Bacteria|p__Spirochaetes|c__Spirochaetia|o__Spirochaetales|f__Spirochaetaceae|g__Treponema	18259	23235	19531	28775	27087	35170	30018	25702	24052	31829	39101	44489	d__Bacteria	p__Spirochaetes	c__Spirochaetia	o__Spirochaetales	f__Spirochaetaceae	g__Treponema
d__Bacteria|p__Spirochaetes|c__Spirochaetia|o__Spirochaetales|f__Spirochaetaceae|g__Spirochaeta	1260	1803	1394	1286	1513	2058	1645	1422	1203	1484	1183	1216	d__Bacteria	p__Spirochaetes	c__Spirochaetia	o__Spirochaetales	f__Spirochaetaceae	g__Spirochaeta
d__Bacteria|p__Spirochaetes|c__Spirochaetia|o__Spirochaetales|f__Spirochaetaceae|g__Salinispira	331	276	242	376	338	346	292	260	268	302	429	439	d__Bacteria	p__Spirochaetes	c__Spirochaetia	o__Spirochaetales	f__Spirochaetaceae	g__Salinispira
d__Bacteria|p__Spirochaetes|c__Spirochaetia|o__Spirochaetales|f__Spirochaetaceae|g__Sediminispirochaeta	219	246	227	294	328	281	218	259	226	262	344	329	d__Bacteria	p__Spirochaetes	c__Spirochaetia	o__Spirochaetales	f__Spirochaetaceae	g__Sediminispirochaeta
d__Bacteria|p__Spirochaetes|c__Spirochaetia|o__Spirochaetales|f__Borreliaceae|g__Borreliella	348	352	333	483	482	319	334	252	266	276	337	315	d__Bacteria	p__Spirochaetes	c__Spirochaetia	o__Spirochaetales	f__Borreliaceae	g__Borreliella
d__Bacteria|p__Spirochaetes|c__Spirochaetia|o__Spirochaetales|f__Borreliaceae|g__Borrelia	281	292	247	385	379	315	318	291	283	322	341	353	d__Bacteria	p__Spirochaetes	c__Spirochaetia	o__Spirochaetales	f__Borreliaceae	g__Borrelia
d__Bacteria|p__Spirochaetes|c__Spirochaetia|f__Leptospiraceae|g__Leptospira|s__Leptospira interrogans	393	1458	907	1177	1630	2496	2697	3310	2307	3143	1855	1524	d__Bacteria	p__Spirochaetes	c__Spirochaetia	f__Leptospiraceae	g__Leptospira	s__Leptospira interrogans
d__Bacteria|p__Spirochaetes|c__Spirochaetia|f__Leptospiraceae|g__Leptospira|s__Leptospira alstonii	383	476	435	268	375	475	741	582	540	443	338	328	d__Bacteria	p__Spirochaetes	c__Spirochaetia	f__Leptospiraceae	g__Leptospira	s__Leptospira alstonii
d__Bacteria|p__Spirochaetes|c__Spirochaetia|f__Leptospiraceae|g__Leptospira|s__Leptospira mayottensis	61	94	91	125	123	86	83	81	83	110	92	119	d__Bacteria	p__Spirochaetes	c__Spirochaetia	f__Leptospiraceae	g__Leptospira	s__Leptospira mayottensis
d__Bacteria|p__Spirochaetes|c__Spirochaetia|f__Leptospiraceae|g__Leptospira|s__Leptospira santarosai	51	55	45	39	64	34	38	27	34	30	36	31	d__Bacteria	p__Spirochaetes	c__Spirochaetia	f__Leptospiraceae	g__Leptospira	s__Leptospira santarosai
d__Bacteria|p__Spirochaetes|c__Spirochaetia|f__Leptospiraceae|g__Leptospira|s__Leptospira biflexa	49	100	101	96	65	147	82	68	68	80	94	102	d__Bacteria	p__Spirochaetes	c__Spirochaetia	f__Leptospiraceae	g__Leptospira	s__Leptospira biflexa
d__Bacteria|p__Spirochaetes|c__Spirochaetia|f__Leptospiraceae|g__Leptospira|s__Leptospira borgpetersenii	42	41	34	52	52	54	69	64	45	62	45	47	d__Bacteria	p__Spirochaetes	c__Spirochaetia	f__Leptospiraceae	g__Leptospira	s__Leptospira borgpetersenii
d__Bacteria|p__Spirochaetes|c__Spirochaetia|f__Leptospiraceae|g__Turneriella|s__Turneriella parva	406	377	322	446	450	465	203	258	412	251	438	232	d__Bacteria	p__Spirochaetes	c__Spirochaetia	f__Leptospiraceae	g__Turneriella	s__Turneriella parva
d__Bacteria|p__Spirochaetes|c__Spirochaetia|o__Brachyspirales|f__Brachyspiraceae|g__Brachyspira	959	1154	920	1318	1503	1472	1546	1235	1038	1408	1489	1685	d__Bacteria	p__Spirochaetes	c__Spirochaetia	o__Brachyspirales	f__Brachyspiraceae	g__Brachyspira
d__Bacteria|p__Synergistetes|c__Synergistia|o__Synergistales|f__Synergistaceae|g__Cloacibacillus	18656	10590	9619	9960	9059	1243	1279	1034	2670	1102	1304	1026	d__Bacteria	p__Synergistetes	c__Synergistia	o__Synergistales	f__Synergistaceae	g__Cloacibacillus
d__Bacteria|p__Synergistetes|c__Synergistia|o__Synergistales|f__Synergistaceae|g__Aminobacterium	4499	6537	9988	7704	3198	6788	2289	1093	1241	1237	3521	3614	d__Bacteria	p__Synergistetes	c__Synergistia	o__Synergistales	f__Synergistaceae	g__Aminobacterium
d__Bacteria|p__Synergistetes|c__Synergistia|o__Synergistales|f__Synergistaceae|g__Aminomonas	2154	1711	1557	1836	1370	649	405	378	567	346	531	562	d__Bacteria	p__Synergistetes	c__Synergistia	o__Synergistales	f__Synergistaceae	g__Aminomonas
d__Bacteria|p__Synergistetes|c__Synergistia|o__Synergistales|f__Synergistaceae|g__Thermovirga	1824	1180	1042	1358	1178	928	179	327	565	259	855	323	d__Bacteria	p__Synergistetes	c__Synergistia	o__Synergistales	f__Synergistaceae	g__Thermovirga
d__Bacteria|p__Synergistetes|c__Synergistia|o__Synergistales|f__Synergistaceae|g__Jonquetella	684	648	597	645	560	576	463	389	392	467	488	504	d__Bacteria	p__Synergistetes	c__Synergistia	o__Synergistales	f__Synergistaceae	g__Jonquetella
d__Bacteria|p__Synergistetes|c__Synergistia|o__Synergistales|f__Synergistaceae|g__Thermanaerovibrio	680	624	544	665	705	457	378	317	413	353	414	450	d__Bacteria	p__Synergistetes	c__Synergistia	o__Synergistales	f__Synergistaceae	g__Thermanaerovibrio
d__Bacteria|p__Synergistetes|c__Synergistia|o__Synergistales|f__Synergistaceae|g__Acetomicrobium	145	107	102	129	115	141	87	93	86	91	95	142	d__Bacteria	p__Synergistetes	c__Synergistia	o__Synergistales	f__Synergistaceae	g__Acetomicrobium
d__Bacteria|p__Verrucomicrobia|c__Verrucomicrobiae|o__Verrucomicrobiales|f__Akkermansiaceae|g__Akkermansia	1364	1458	1185	1324	1313	1192	1231	1094	1162	1241	1240	1335	d__Bacteria	p__Verrucomicrobia	c__Verrucomicrobiae	o__Verrucomicrobiales	f__Akkermansiaceae	g__Akkermansia
d__Bacteria|p__Verrucomicrobia|c__Verrucomicrobiae|o__Verrucomicrobiales|f__Verrucomicrobiaceae|g__Verrucomicrobium	1245	1329	1118	1247	1326	1428	1153	987	875	1088	989	1054	d__Bacteria	p__Verrucomicrobia	c__Verrucomicrobiae	o__Verrucomicrobiales	f__Verrucomicrobiaceae	g__Verrucomicrobium
d__Bacteria|p__Verrucomicrobia|c__Opitutae|o__Opitutales|f__Opitutaceae|g__Opitutus	823	893	726	853	891	708	820	856	750	755	847	897	d__Bacteria	p__Verrucomicrobia	c__Opitutae	o__Opitutales	f__Opitutaceae	g__Opitutus
d__Bacteria|p__Verrucomicrobia|c__Opitutae|o__Opitutales|f__Opitutaceae|s__Opitutaceae bacterium TAV5	514	601	711	636	558	779	366	357	378	389	419	481	d__Bacteria	p__Verrucomicrobia	c__Opitutae	o__Opitutales	f__Opitutaceae	s__Opitutaceae bacterium TAV5
d__Bacteria|p__Verrucomicrobia|c__Opitutae|o__Opitutales|f__Opitutaceae|g__Ereboglobus	319	330	253	331	340	297	283	228	238	234	287	274	d__Bacteria	p__Verrucomicrobia	c__Opitutae	o__Opitutales	f__Opitutaceae	g__Ereboglobus
d__Bacteria|p__Verrucomicrobia|c__Opitutae|o__Opitutales|f__Opitutaceae|g__Lacunisphaera	229	270	220	280	266	272	249	241	238	229	268	274	d__Bacteria	p__Verrucomicrobia	c__Opitutae	o__Opitutales	f__Opitutaceae	g__Lacunisphaera
d__Bacteria|p__Verrucomicrobia|c__Opitutae|o__Puniceicoccales|f__Puniceicoccaceae|g__Coraliomargarita	253	329	326	320	362	397	417	310	278	339	273	303	d__Bacteria	p__Verrucomicrobia	c__Opitutae	o__Puniceicoccales	f__Puniceicoccaceae	g__Coraliomargarita
d__Bacteria|p__Verrucomicrobia|c__Methylacidiphilae|o__Methylacidiphilales|f__Methylacidiphilaceae|g__Methylacidiphilum	148	156	138	184	199	215	222	233	206	196	203	217	d__Bacteria	p__Verrucomicrobia	c__Methylacidiphilae	o__Methylacidiphilales	f__Methylacidiphilaceae	g__Methylacidiphilum
d__Bacteria|p__Planctomycetes|c__Planctomycetia|o__Planctomycetales|f__Planctomycetaceae|g__Planctomyces	814	1162	867	1046	1153	1255	1976	1378	1052	1361	1045	1511	d__Bacteria	p__Planctomycetes	c__Planctomycetia	o__Planctomycetales	f__Planctomycetaceae	g__Planctomyces
d__Bacteria|p__Planctomycetes|c__Planctomycetia|o__Planctomycetales|f__Planctomycetaceae|g__Rhodopirellula	469	958	1510	777	496	1587	528	257	208	175	265	206	d__Bacteria	p__Planctomycetes	c__Planctomycetia	o__Planctomycetales	f__Planctomycetaceae	g__Rhodopirellula
d__Bacteria|p__Planctomycetes|c__Planctomycetia|o__Planctomycetales|f__Planctomycetaceae|g__Rubinisphaera	360	491	423	549	403	453	176	212	276	206	409	305	d__Bacteria	p__Planctomycetes	c__Planctomycetia	o__Planctomycetales	f__Planctomycetaceae	g__Rubinisphaera
d__Bacteria|p__Planctomycetes|c__Planctomycetia|o__Planctomycetales|f__Planctomycetaceae|g__Thermogutta	274	489	713	384	364	2323	542	229	205	242	485	482	d__Bacteria	p__Planctomycetes	c__Planctomycetia	o__Planctomycetales	f__Planctomycetaceae	g__Thermogutta
d__Bacteria|p__Planctomycetes|c__Planctomycetia|o__Planctomycetales|f__Planctomycetaceae|g__Pirellula	171	235	200	263	209	180	179	172	173	180	177	200	d__Bacteria	p__Planctomycetes	c__Planctomycetia	o__Planctomycetales	f__Planctomycetaceae	g__Pirellula
d__Bacteria|p__Planctomycetes|c__Planctomycetia|o__Planctomycetales|f__Planctomycetaceae|g__Planctopirus	164	162	166	178	167	199	164	132	131	119	127	135	d__Bacteria	p__Planctomycetes	c__Planctomycetia	o__Planctomycetales	f__Planctomycetaceae	g__Planctopirus
d__Bacteria|p__Planctomycetes|c__Planctomycetia|o__Planctomycetales|f__Planctomycetaceae|g__Fuerstia	118	173	160	195	192	358	197	190	171	187	283	273	d__Bacteria	p__Planctomycetes	c__Planctomycetia	o__Planctomycetales	f__Planctomycetaceae	g__Fuerstia
d__Bacteria|p__Planctomycetes|c__Planctomycetia|o__Planctomycetales|f__Isosphaeraceae|g__Paludisphaera	452	650	794	658	603	1184	398	392	287	310	414	354	d__Bacteria	p__Planctomycetes	c__Planctomycetia	o__Planctomycetales	f__Isosphaeraceae	g__Paludisphaera
d__Bacteria|p__Planctomycetes|c__Planctomycetia|o__Planctomycetales|f__Isosphaeraceae|g__Singulisphaera	275	264	250	281	272	265	249	211	249	230	216	260	d__Bacteria	p__Planctomycetes	c__Planctomycetia	o__Planctomycetales	f__Isosphaeraceae	g__Singulisphaera
d__Bacteria|p__Planctomycetes|c__Planctomycetia|o__Planctomycetales|f__Isosphaeraceae|g__Isosphaera	208	228	202	253	229	198	230	169	177	201	170	182	d__Bacteria	p__Planctomycetes	c__Planctomycetia	o__Planctomycetales	f__Isosphaeraceae	g__Isosphaera
d__Bacteria|p__Planctomycetes|c__Planctomycetia|o__Planctomycetales|f__Gemmataceae|g__Gemmata	642	908	649	812	763	705	732	612	653	641	620	692	d__Bacteria	p__Planctomycetes	c__Planctomycetia	o__Planctomycetales	f__Gemmataceae	g__Gemmata
d__Bacteria|p__Planctomycetes|c__Planctomycetia|o__Candidatus Brocadiales|f__Candidatus Brocadiaceae|g__Candidatus Kuenenia	133	125	72	142	179	228	201	244	195	242	164	151	d__Bacteria	p__Planctomycetes	c__Planctomycetia	o__Candidatus Brocadiales	f__Candidatus Brocadiaceae	g__Candidatus Kuenenia
d__Bacteria|p__Planctomycetes|c__Phycisphaerae|o__Phycisphaerales|f__Phycisphaeraceae|g__Phycisphaera	420	637	539	1295	498	459	448	450	395	546	2066	2237	d__Bacteria	p__Planctomycetes	c__Phycisphaerae	o__Phycisphaerales	f__Phycisphaeraceae	g__Phycisphaera
d__Bacteria|p__Kiritimatiellaeota|c__Kiritimatiellae|o__Kiritimatiellales|f__Kiritimatiellaceae|g__Kiritimatiella	675	2071	1658	2233	1764	1066	731	679	778	764	1421	1340	d__Bacteria	p__Kiritimatiellaeota	c__Kiritimatiellae	o__Kiritimatiellales	f__Kiritimatiellaceae	g__Kiritimatiella
d__Bacteria|p__Chlamydiae|c__Chlamydiia|o__Parachlamydiales|f__Waddliaceae|g__Waddlia	155	406	484	753	336	1999	508	337	252	305	1509	1484	d__Bacteria	p__Chlamydiae	c__Chlamydiia	o__Parachlamydiales	f__Waddliaceae	g__Waddlia
d__Bacteria|p__Chlamydiae|c__Chlamydiia|o__Parachlamydiales|f__Parachlamydiaceae|g__Candidatus Protochlamydia	73	74	52	119	96	84	107	96	84	86	105	113	d__Bacteria	p__Chlamydiae	c__Chlamydiia	o__Parachlamydiales	f__Parachlamydiaceae	g__Candidatus Protochlamydia
d__Bacteria|p__Chlamydiae|c__Chlamydiia|o__Parachlamydiales|f__Parachlamydiaceae|g__Parachlamydia	35	36	28	42	27	29	27	25	25	32	48	22	d__Bacteria	p__Chlamydiae	c__Chlamydiia	o__Parachlamydiales	f__Parachlamydiaceae	g__Parachlamydia
d__Bacteria|p__Chlamydiae|c__Chlamydiia|o__Parachlamydiales|f__Simkaniaceae|g__Simkania	43	38	35	33	37	31	41	38	43	36	48	42	d__Bacteria	p__Chlamydiae	c__Chlamydiia	o__Parachlamydiales	f__Simkaniaceae	g__Simkania
d__Bacteria|p__Chlamydiae|c__Chlamydiia|o__Chlamydiales|f__Chlamydiaceae|g__Chlamydia	294	570	406	311	370	898	589	488	383	411	465	539	d__Bacteria	p__Chlamydiae	c__Chlamydiia	o__Chlamydiales	f__Chlamydiaceae	g__Chlamydia
d__Bacteria|p__Fusobacteria|c__Fusobacteriia|o__Fusobacteriales|f__Leptotrichiaceae|g__Leptotrichia	9577	6443	6514	6767	6298	4925	3077	2950	4276	4437	3945	5131	d__Bacteria	p__Fusobacteria	c__Fusobacteriia	o__Fusobacteriales	f__Leptotrichiaceae	g__Leptotrichia
d__Bacteria|p__Fusobacteria|c__Fusobacteriia|o__Fusobacteriales|f__Leptotrichiaceae|g__Sebaldella	743	672	555	660	704	579	553	406	415	557	499	780	d__Bacteria	p__Fusobacteria	c__Fusobacteriia	o__Fusobacteriales	f__Leptotrichiaceae	g__Sebaldella
d__Bacteria|p__Fusobacteria|c__Fusobacteriia|o__Fusobacteriales|f__Leptotrichiaceae|g__Sneathia	56	68	64	113	104	92	103	134	118	123	166	260	d__Bacteria	p__Fusobacteria	c__Fusobacteriia	o__Fusobacteriales	f__Leptotrichiaceae	g__Sneathia
d__Bacteria|p__Fusobacteria|c__Fusobacteriia|o__Fusobacteriales|f__Leptotrichiaceae|g__Streptobacillus	24	42	35	36	41	41	449	53	32	138	49	281	d__Bacteria	p__Fusobacteria	c__Fusobacteriia	o__Fusobacteriales	f__Leptotrichiaceae	g__Streptobacillus
d__Bacteria|p__Fusobacteria|c__Fusobacteriia|o__Fusobacteriales|f__Fusobacteriaceae|g__Fusobacterium	1604	1651	1282	1963	1723	1843	2603	1861	1806	1972	2498	2223	d__Bacteria	p__Fusobacteria	c__Fusobacteriia	o__Fusobacteriales	f__Fusobacteriaceae	g__Fusobacterium
d__Bacteria|p__Fusobacteria|c__Fusobacteriia|o__Fusobacteriales|f__Fusobacteriaceae|g__Ilyobacter	281	325	249	418	422	654	918	684	474	766	746	963	d__Bacteria	p__Fusobacteria	c__Fusobacteriia	o__Fusobacteriales	f__Fusobacteriaceae	g__Ilyobacter
d__Bacteria|p__Thermotogae|c__Thermotogae|o__Thermotogales|f__Thermotogaceae|g__Thermotoga	878	2077	2478	2893	1981	5591	4132	1727	1392	1426	3035	3123	d__Bacteria	p__Thermotogae	c__Thermotogae	o__Thermotogales	f__Thermotogaceae	g__Thermotoga
d__Bacteria|p__Thermotogae|c__Thermotogae|o__Thermotogales|f__Thermotogaceae|g__Pseudothermotoga	492	1166	671	964	736	810	953	924	1250	1166	1687	2175	d__Bacteria	p__Thermotogae	c__Thermotogae	o__Thermotogales	f__Thermotogaceae	g__Pseudothermotoga
d__Bacteria|p__Thermotogae|c__Thermotogae|o__Thermotogales|f__Fervidobacteriaceae|g__Fervidobacterium	889	2154	1724	2639	1665	2397	2486	1907	1895	2176	3047	3907	d__Bacteria	p__Thermotogae	c__Thermotogae	o__Thermotogales	f__Fervidobacteriaceae	g__Fervidobacterium
d__Bacteria|p__Thermotogae|c__Thermotogae|o__Thermotogales|f__Fervidobacteriaceae|g__Thermosipho	277	173	156	290	256	311	310	220	225	337	298	310	d__Bacteria	p__Thermotogae	c__Thermotogae	o__Thermotogales	f__Fervidobacteriaceae	g__Thermosipho
d__Bacteria|p__Thermotogae|c__Thermotogae|o__Kosmotogales|f__Kosmotogaceae|g__Kosmotoga	423	528	492	522	546	424	268	301	333	334	309	312	d__Bacteria	p__Thermotogae	c__Thermotogae	o__Kosmotogales	f__Kosmotogaceae	g__Kosmotoga
d__Bacteria|p__Thermotogae|c__Thermotogae|o__Kosmotogales|f__Kosmotogaceae|g__Mesotoga	41	62	58	43	80	55	54	52	76	56	81	56	d__Bacteria	p__Thermotogae	c__Thermotogae	o__Kosmotogales	f__Kosmotogaceae	g__Mesotoga
d__Bacteria|p__Thermotogae|c__Thermotogae|o__Petrotogales|g__Marinitoga|s__Marinitoga piezophila	9	4	4	5	6	2	8	4	5	5	7	12	d__Bacteria	p__Thermotogae	c__Thermotogae	o__Petrotogales	g__Marinitoga	s__Marinitoga piezophila
d__Bacteria|p__Thermotogae|c__Thermotogae|o__Petrotogales|g__Marinitoga|s__Marinitoga sp. 1137	3	2	2	6	8	2	3	6	3	3	2	5	d__Bacteria	p__Thermotogae	c__Thermotogae	o__Petrotogales	g__Marinitoga	s__Marinitoga sp. 1137
d__Bacteria|p__Thermotogae|c__Thermotogae|o__Petrotogales|g__Petrotoga|s__Petrotoga mobilis	62	70	55	78	81	89	144	84	72	124	94	122	d__Bacteria	p__Thermotogae	c__Thermotogae	o__Petrotogales	g__Petrotoga	s__Petrotoga mobilis
d__Bacteria|p__Thermotogae|c__Thermotogae|o__Petrotogales|g__Defluviitoga|s__Defluviitoga tunisiensis	25	26	22	34	26	38	65	47	47	59	50	75	d__Bacteria	p__Thermotogae	c__Thermotogae	o__Petrotogales	g__Defluviitoga	s__Defluviitoga tunisiensis
d__Bacteria|p__Acidobacteria|c__Acidobacteriia|o__Acidobacteriales|f__Acidobacteriaceae|g__Granulicella	425	487	407	491	524	744	412	504	520	351	419	331	d__Bacteria	p__Acidobacteria	c__Acidobacteriia	o__Acidobacteriales	f__Acidobacteriaceae	g__Granulicella
d__Bacteria|p__Acidobacteria|c__Acidobacteriia|o__Acidobacteriales|f__Acidobacteriaceae|g__Terriglobus	418	438	350	484	413	418	409	374	324	404	438	469	d__Bacteria	p__Acidobacteria	c__Acidobacteriia	o__Acidobacteriales	f__Acidobacteriaceae	g__Terriglobus
d__Bacteria|p__Acidobacteria|c__Acidobacteriia|o__Acidobacteriales|f__Acidobacteriaceae|g__Acidobacterium	328	462	351	491	399	275	244	234	291	255	283	265	d__Bacteria	p__Acidobacteria	c__Acidobacteriia	o__Acidobacteriales	f__Acidobacteriaceae	g__Acidobacterium
d__Bacteria|p__Acidobacteria|c__Acidobacteriia|o__Acidobacteriales|f__Acidobacteriaceae|g__Candidatus Koribacter	171	171	127	156	158	179	188	171	141	170	198	206	d__Bacteria	p__Acidobacteria	c__Acidobacteriia	o__Acidobacteriales	f__Acidobacteriaceae	g__Candidatus Koribacter
d__Bacteria|p__Acidobacteria|c__Acidobacteriia|o__Acidobacteriales|f__Acidobacteriaceae|s__Acidobacteriaceae bacterium SBC82	144	133	130	118	124	121	90	108	128	91	109	123	d__Bacteria	p__Acidobacteria	c__Acidobacteriia	o__Acidobacteriales	f__Acidobacteriaceae	s__Acidobacteriaceae bacterium SBC82
d__Bacteria|p__Acidobacteria|c__Solibacteres|o__Solibacterales|f__Solibacteraceae|g__Candidatus Solibacter	904	889	1227	841	970	4009	1076	721	522	744	1087	1046	d__Bacteria	p__Acidobacteria	c__Solibacteres	o__Solibacterales	f__Solibacteraceae	g__Candidatus Solibacter
d__Bacteria|p__Acidobacteria|c__Acidobacteria subdivision 6|f__Vicinamibacteraceae|g__Luteitalea|s__Luteitalea pratensis	678	1017	1222	790	835	1256	370	480	414	377	497	379	d__Bacteria	p__Acidobacteria	c__Acidobacteria subdivision 6	f__Vicinamibacteraceae	g__Luteitalea	s__Luteitalea pratensis
d__Bacteria|p__Aquificae|c__Aquificae|o__Aquificales|f__Hydrogenothermaceae|g__Persephonella	917	502	534	572	576	336	244	343	447	247	441	191	d__Bacteria	p__Aquificae	c__Aquificae	o__Aquificales	f__Hydrogenothermaceae	g__Persephonella
d__Bacteria|p__Aquificae|c__Aquificae|o__Aquificales|f__Hydrogenothermaceae|g__Sulfurihydrogenibium	273	1063	1053	1132	528	982	392	252	284	271	669	717	d__Bacteria	p__Aquificae	c__Aquificae	o__Aquificales	f__Hydrogenothermaceae	g__Sulfurihydrogenibium
d__Bacteria|p__Aquificae|c__Aquificae|o__Aquificales|f__Aquificaceae|g__Aquifex	123	68	42	93	83	87	39	45	47	39	65	71	d__Bacteria	p__Aquificae	c__Aquificae	o__Aquificales	f__Aquificaceae	g__Aquifex
d__Bacteria|p__Aquificae|c__Aquificae|o__Aquificales|f__Aquificaceae|g__Thermocrinis	69	73	51	73	75	71	70	55	62	78	75	68	d__Bacteria	p__Aquificae	c__Aquificae	o__Aquificales	f__Aquificaceae	g__Thermocrinis
d__Bacteria|p__Aquificae|c__Aquificae|o__Aquificales|f__Aquificaceae|g__Hydrogenobaculum	28	32	30	26	39	49	47	35	31	45	56	47	d__Bacteria	p__Aquificae	c__Aquificae	o__Aquificales	f__Aquificaceae	g__Hydrogenobaculum
d__Bacteria|p__Aquificae|c__Aquificae|o__Aquificales|f__Aquificaceae|g__Hydrogenobacter	19	416	109	269	189	426	501	477	179	309	432	665	d__Bacteria	p__Aquificae	c__Aquificae	o__Aquificales	f__Aquificaceae	g__Hydrogenobacter
d__Bacteria|p__Aquificae|c__Aquificae|o__Aquificales|g__Thermosulfidibacter|s__Thermosulfidibacter takaii	163	201	156	291	225	139	65	110	121	87	140	116	d__Bacteria	p__Aquificae	c__Aquificae	o__Aquificales	g__Thermosulfidibacter	s__Thermosulfidibacter takaii
d__Bacteria|p__Aquificae|c__Aquificae|o__Desulfurobacteriales|f__Desulfurobacteriaceae|g__Thermovibrio	52	101	93	94	94	108	185	121	101	168	103	139	d__Bacteria	p__Aquificae	c__Aquificae	o__Desulfurobacteriales	f__Desulfurobacteriaceae	g__Thermovibrio
d__Bacteria|p__Aquificae|c__Aquificae|o__Desulfurobacteriales|f__Desulfurobacteriaceae|g__Desulfurobacterium	45	35	45	44	37	69	66	34	45	36	57	43	d__Bacteria	p__Aquificae	c__Aquificae	o__Desulfurobacteriales	f__Desulfurobacteriaceae	g__Desulfurobacterium
d__Bacteria|p__Nitrospirae|c__Nitrospira|o__Nitrospirales|f__Nitrospiraceae|g__Nitrospira	565	599	528	616	627	542	595	522	457	603	495	641	d__Bacteria	p__Nitrospirae	c__Nitrospira	o__Nitrospirales	f__Nitrospiraceae	g__Nitrospira
d__Bacteria|p__Nitrospirae|c__Nitrospira|o__Nitrospirales|f__Nitrospiraceae|g__Thermodesulfovibrio	348	500	499	519	360	1699	625	367	371	421	1198	1140	d__Bacteria	p__Nitrospirae	c__Nitrospira	o__Nitrospirales	f__Nitrospiraceae	g__Thermodesulfovibrio
d__Bacteria|p__Nitrospirae|c__Nitrospira|o__Nitrospirales|f__Nitrospiraceae|g__Leptospirillum	176	218	225	221	267	370	408	425	228	337	260	254	d__Bacteria	p__Nitrospirae	c__Nitrospira	o__Nitrospirales	f__Nitrospiraceae	g__Leptospirillum
d__Bacteria|p__Elusimicrobia|c__Elusimicrobia|o__Elusimicrobiales|f__Elusimicrobiaceae|g__Elusimicrobium	400	398	474	398	379	172	74	87	117	77	126	88	d__Bacteria	p__Elusimicrobia	c__Elusimicrobia	o__Elusimicrobiales	f__Elusimicrobiaceae	g__Elusimicrobium
d__Bacteria|p__Elusimicrobia|c__Endomicrobia|o__Endomicrobiales|f__Endomicrobiaceae|g__Endomicrobium	162	254	227	315	227	202	193	147	162	166	214	225	d__Bacteria	p__Elusimicrobia	c__Endomicrobia	o__Endomicrobiales	f__Endomicrobiaceae	g__Endomicrobium
d__Bacteria|p__Deferribacteres|c__Deferribacteres|o__Deferribacterales|f__Deferribacteraceae|g__Denitrovibrio	225	246	260	272	253	406	234	185	167	186	184	187	d__Bacteria	p__Deferribacteres	c__Deferribacteres	o__Deferribacterales	f__Deferribacteraceae	g__Denitrovibrio
d__Bacteria|p__Deferribacteres|c__Deferribacteres|o__Deferribacterales|f__Deferribacteraceae|g__Flexistipes	223	242	244	198	211	171	138	111	126	131	100	148	d__Bacteria	p__Deferribacteres	c__Deferribacteres	o__Deferribacterales	f__Deferribacteraceae	g__Flexistipes
d__Bacteria|p__Deferribacteres|c__Deferribacteres|o__Deferribacterales|f__Deferribacteraceae|g__Deferribacter	93	101	61	58	73	84	136	71	85	81	103	101	d__Bacteria	p__Deferribacteres	c__Deferribacteres	o__Deferribacterales	f__Deferribacteraceae	g__Deferribacter
d__Bacteria|p__Deferribacteres|c__Deferribacteres|o__Deferribacterales|f__Deferribacteraceae|g__Calditerrivibrio	71	82	91	89	104	98	64	43	59	49	82	68	d__Bacteria	p__Deferribacteres	c__Deferribacteres	o__Deferribacterales	f__Deferribacteraceae	g__Calditerrivibrio
d__Bacteria|p__Calditrichaeota|c__Calditrichae|o__Calditrichales|f__Calditrichaceae|g__Caldithrix	394	657	529	723	569	958	468	469	485	582	689	777	d__Bacteria	p__Calditrichaeota	c__Calditrichae	o__Calditrichales	f__Calditrichaceae	g__Caldithrix
d__Bacteria|p__Dictyoglomi|c__Dictyoglomia|o__Dictyoglomales|f__Dictyoglomaceae|g__Dictyoglomus	359	521	508	425	499	470	565	665	430	517	384	415	d__Bacteria	p__Dictyoglomi	c__Dictyoglomia	o__Dictyoglomales	f__Dictyoglomaceae	g__Dictyoglomus
d__Bacteria|p__Thermodesulfobacteria|c__Thermodesulfobacteria|o__Thermodesulfobacteriales|f__Thermodesulfobacteriaceae|g__Thermodesulfobacterium	118	104	104	119	131	137	123	146	103	141	144	125	d__Bacteria	p__Thermodesulfobacteria	c__Thermodesulfobacteria	o__Thermodesulfobacteriales	f__Thermodesulfobacteriaceae	g__Thermodesulfobacterium
d__Bacteria|p__Thermodesulfobacteria|c__Thermodesulfobacteria|o__Thermodesulfobacteriales|f__Thermodesulfobacteriaceae|g__Thermodesulfatator	88	98	66	89	95	95	175	114	94	136	75	97	d__Bacteria	p__Thermodesulfobacteria	c__Thermodesulfobacteria	o__Thermodesulfobacteriales	f__Thermodesulfobacteriaceae	g__Thermodesulfatator
d__Bacteria|p__Thermodesulfobacteria|c__Thermodesulfobacteria|o__Thermodesulfobacteriales|f__Thermodesulfobacteriaceae|g__Caldimicrobium	13	22	16	15	20	14	27	32	14	24	17	39	d__Bacteria	p__Thermodesulfobacteria	c__Thermodesulfobacteria	o__Thermodesulfobacteriales	f__Thermodesulfobacteriaceae	g__Caldimicrobium
d__Bacteria|p__Chrysiogenetes|c__Chrysiogenetes|o__Chrysiogenales|f__Chrysiogenaceae|g__Desulfurispirillum	196	239	213	263	234	241	267	220	228	244	216	242	d__Bacteria	p__Chrysiogenetes	c__Chrysiogenetes	o__Chrysiogenales	f__Chrysiogenaceae	g__Desulfurispirillum
d__Bacteria|p__Caldiserica|c__Caldisericia|o__Caldisericales|f__Caldisericaceae|g__Caldisericum	34	79	59	69	59	74	141	72	89	91	103	207	d__Bacteria	p__Caldiserica	c__Caldisericia	o__Caldisericales	f__Caldisericaceae	g__Caldisericum
