# Supplementary material for: Metatranscriptomic changes in the propionate pathway and carbohydrate enzyme revealed the rebalancing mechanism of rumen microbiota after CH4 inhibition by 3-NOP
Source: Research Square preprint supplement (doi:10.21203/rs.3.rs-7121971/v1), 2025-08-11
Supplement: Supplementary file 9 [file e7718ecfec716ffccb6c8cd4.xlsx]

## Sheet: origanic acid
Pathway	ID	CON	CON	CON	CON	CON	CON	3-NOP	3-NOP	3-NOP	3-NOP	3-NOP	3-NOP
Acetate->Butyrate	K01895	0.57	0.4	0.23	0.28	1.27	0.48	0.35	0.48	0.4	0.41	0.54	0.69	ACSS1_2, acs; acetyl-CoA synthetase [EC:6.2.1.1]
Acetate->Butyrate	K01782	0.6	0.38	0.61	0.45	1.54	0.72	0.52	0.39	0.42	0.72	0.95	1.04	fadJ; 3-hydroxyacyl-CoA dehydrogenase / enoyl-CoA hydratase / 3-hydroxybutyryl-CoA epimerase [EC:1.1.1.35 4.2.1.17 5.1.2.3]
Acetate->Butyrate	K00023	1.06	1.28	1.04	1.07	3.68	1.77	1.52	1.82	1.75	1.65	1.76	2.79	phbB; acetoacetyl-CoA reductase [EC:1.1.1.36]
Acetate->Butyrate	K07516	2	1.56	1.36	1.6	2.82	1.61	1.39	1.36	1.14	1.55	2.04	1.24	fadN; 3-hydroxyacyl-CoA dehydrogenase [EC:1.1.1.35]
Acetate->Butyrate	K00209	3.04	3.54	2.95	3.94	7.12	4.56	6.46	6.38	7.93	8.31	8.95	7.82	fabV, ter; enoyl-[acyl-carrier protein] reductase / trans-2-enoyl-CoA reductase (NAD+) [EC:1.3.1.9 1.3.1.44]
Acetate->Butyrate	K17865	8.76	11.6	9.64	12.21	14.16	10.07	10.05	12.87	15.37	13.49	19.34	5.02	croR; 3-hydroxybutyryl-CoA dehydratase [EC:4.2.1.55]
Acetate->Butyrate	K01715	98.35	109.91	105.25	127.94	134.97	112.18	97.57	102.74	110.27	125.28	158.37	71.34	crt; enoyl-CoA hydratase [EC:4.2.1.17]
Acetate->Butyrate	K00074	262.01	252.25	230.07	263.95	284.92	235.94	209.31	205.15	276.9	241.19	370.29	171.39	paaH, hbd, fadB, mmgB; 3-hydroxybutyryl-CoA dehydrogenase [EC:1.1.1.157]
Acetate->Butyrate	K00626	476.22	489.75	426.09	459.25	548.62	415.52	455.18	442.54	517.13	497.28	679.86	181.49	E2.3.1.9, atoB; acetyl-CoA C-acetyltransferase [EC:2.3.1.9]
Starch->Glucose	K00702	43.64	38.23	33.25	46.26	54.27	43.29	50.75	57.81	58.26	68.54	69.46	68.83	E2.4.1.20; cellobiose phosphorylase [EC:2.4.1.20]
Pyruvate->Acetate	K18118	41.1	47.84	41.82	45.99	52.05	39.45	58.58	68.69	68.46	71.92	97.84	57.53	aarC, cat1; succinyl-CoA:acetate CoA-transferase [EC:2.8.3.18]
Pyruvate->Acetate	K00625	46.53	40.31	33.69	40.02	42.56	38.65	27.58	31.16	32.01	31.09	36.06	24.97	E2.3.1.8, pta; phosphate acetyltransferase [EC:2.3.1.8]
Pyruvate->Acetate	K01035	69.33	58.93	53.46	64.71	67.77	57.37	35.27	44.97	36.46	50.51	41.77	36.46	atoA; acetate CoA/acetoacetate CoA-transferase beta subunit [EC:2.8.3.8 2.8.3.9]
Pyruvate->Acetate	K01034	112.7	97.3	88.8	101.82	109.11	99.7	98.54	121.12	88.57	121.79	119.6	59.18	atoD; acetate CoA/acetoacetate CoA-transferase alpha subunit [EC:2.8.3.8 2.8.3.9]
Pyruvate->Acetate	K00175	236.86	195.44	174.48	246.11	278.11	200.77	123.29	153.2	147.05	196.16	192.49	154.97	korB, oorB, oforB; 2-oxoglutarate/2-oxoacid ferredoxin oxidoreductase subunit beta [EC:1.2.7.3 1.2.7.11]
Pyruvate->Acetate	K00174	254.76	223.31	190.5	283.84	311.24	217.58	138.86	188.57	172.24	225.99	232.38	165.77	korA, oorA, oforA; 2-oxoglutarate/2-oxoacid ferredoxin oxidoreductase subunit alpha [EC:1.2.7.3 1.2.7.11]
Pyruvate->Acetate	K00925	311.91	297.71	256.14	300.69	316.67	274.11	243.27	274.96	286.8	300.18	327.56	228.28	ackA; acetate kinase [EC:2.7.2.1]
Pyruvate->Butyrate	K00023	1.06	1.28	1.04	1.07	3.68	1.77	1.52	1.82	1.75	1.65	1.76	2.79	phbB; acetoacetyl-CoA reductase [EC:1.1.1.36]
Pyruvate->Butyrate	K17865	8.76	11.6	9.64	12.21	14.16	10.07	10.05	12.87	15.37	13.49	19.34	5.02	croR; 3-hydroxybutyryl-CoA dehydratase [EC:4.2.1.55]
Pyruvate->Butyrate	K01692	9.73	8.61	6.2	11.03	11.59	7.15	6.4	5.7	8.15	8.96	14.79	5.25	paaF, echA; enoyl-CoA hydratase [EC:4.2.1.17]
Pyruvate->Butyrate	K00634	14.58	8.32	8.23	11.31	12.27	7.47	3.74	4.46	4.46	5.85	6.21	6.17	ptb; phosphate butyryltransferase [EC:2.3.1.19]
Pyruvate->Butyrate	K00171	65.98	67.44	59.08	73.09	84.44	63.11	32.85	45.89	33.48	45.04	41.65	11.19	porD; pyruvate ferredoxin oxidoreductase delta subunit [EC:1.2.7.1]
Pyruvate->Butyrate	K01035	69.33	58.93	53.46	64.71	67.77	57.37	35.27	44.97	36.46	50.51	41.77	36.46	atoA; acetate CoA/acetoacetate CoA-transferase beta subunit [EC:2.8.3.8 2.8.3.9]
Pyruvate->Butyrate	K00929	71.75	61.06	60.07	75.04	77.51	65.83	44.22	53.21	46.56	54.81	58.08	38.38	buk; butyrate kinase [EC:2.7.2.7]
Pyruvate->Butyrate	K00172	98.01	97.99	92.58	111.4	85.85	103.78	39.77	62.43	45.16	44.43	49.44	20.4	porG; pyruvate ferredoxin oxidoreductase gamma subunit [EC:1.2.7.1]
Pyruvate->Butyrate	K01715	98.35	109.91	105.25	127.94	134.97	112.18	97.57	102.74	110.27	125.28	158.37	71.34	crt; enoyl-CoA hydratase [EC:4.2.1.17]
Pyruvate->Butyrate	K01034	112.7	97.3	88.8	101.82	109.11	99.7	98.54	121.12	88.57	121.79	119.6	59.18	atoD; acetate CoA/acetoacetate CoA-transferase alpha subunit [EC:2.8.3.8 2.8.3.9]
Pyruvate->Butyrate	K00169	115.81	121.68	104.38	132.88	141.78	107.66	56.22	81.92	61.13	83.48	80.4	19.62	porA; pyruvate ferredoxin oxidoreductase alpha subunit [EC:1.2.7.1]
Pyruvate->Butyrate	K00170	162.14	166.87	151.96	180.03	186.45	153.75	69.51	101.97	72.63	103.71	79.95	24.25	porB; pyruvate ferredoxin oxidoreductase beta subunit [EC:1.2.7.1]
Pyruvate->Butyrate	K00175	236.86	195.44	174.48	246.11	278.11	200.77	123.29	153.2	147.05	196.16	192.49	154.97	korB, oorB, oforB; 2-oxoglutarate/2-oxoacid ferredoxin oxidoreductase subunit beta [EC:1.2.7.3 1.2.7.11]
Pyruvate->Butyrate	K00174	254.76	223.31	190.5	283.84	311.24	217.58	138.86	188.57	172.24	225.99	232.38	165.77	korA, oorA, oforA; 2-oxoglutarate/2-oxoacid ferredoxin oxidoreductase subunit alpha [EC:1.2.7.3 1.2.7.11]
Pyruvate->Butyrate	K00074	262.01	252.25	230.07	263.95	284.92	235.94	209.31	205.15	276.9	241.19	370.29	171.39	paaH, hbd, fadB, mmgB; 3-hydroxybutyryl-CoA dehydrogenase [EC:1.1.1.157]
Pyruvate->Butyrate	K00626	476.22	489.75	426.09	459.25	548.62	415.52	455.18	442.54	517.13	497.28	679.86	181.49	E2.3.1.9, atoB; acetyl-CoA C-acetyltransferase [EC:2.3.1.9]
Pyuvate->Lacate->Propionate	K20626	0	0	0	0	0	0	2.66	0	10.16	0.26	18.46	7.65	lcdA; lactoyl-CoA dehydratase subunit alpha [EC:4.2.1.54]
Pyuvate->Lacate->Propionate	K20627	0	0	0	0	0	0	4.07	0.05	17.27	0.36	25.14	15.66	lcdB; lactoyl-CoA dehydratase subunit beta [EC:4.2.1.54]
Pyuvate->Lacate->Propionate	K00249	16.61	23.53	20.69	26.31	29.08	19.81	18.27	17.46	22.37	18.64	33.81	10	ACADM, acd; acyl-CoA dehydrogenase [EC:1.3.8.7]
Pyuvate->Lacate->Propionate	K00016	34.46	27.95	23.68	25.74	26.56	25.04	29.53	33.16	36.58	36.61	40.59	34.93	LDH, ldh; L-lactate dehydrogenase [EC:1.1.1.27]
Pyuvate->Lacate->Propionate	K01026	45.16	45.42	38.3	42.79	49.94	39.54	29.87	32.87	41.73	35.35	53.85	18.18	pct; propionate CoA-transferase [EC:2.8.3.1]
Pyuvate->Lacate->Propionate	K00248	192.11	217.82	189.94	235.85	262.71	196.37	150.77	176.9	194.53	212.86	280.74	115.79	ACADS, bcd; butyryl-CoA dehydrogenase [EC:1.3.8.1]
Pyuvate->Succinate->Propionate	K00026	2.08	3.11	2.17	1.56	1.47	2.59	2.07	3.97	2.09	2.98	2.54	3.13	MDH2; malate dehydrogenase [EC:1.1.1.37]
Pyuvate->Succinate->Propionate	K01899	2.62	4.48	3.48	2.2	2.44	4.21	3.36	6.64	2.88	4.88	2.67	3.79	LSC1; succinyl-CoA synthetase alpha subunit [EC:6.2.1.4 6.2.1.5]
Pyuvate->Succinate->Propionate	K01679	6.89	7.13	7.53	11.26	14.28	10.07	13.34	14.34	15.8	18.67	18.72	19.43	E4.2.1.2B, fumC, FH; fumarate hydratase, class II [EC:4.2.1.2]
Pyuvate->Succinate->Propionate	K01958	7.47	7.86	7.56	8.81	9.06	7.53	7.28	8.05	10.21	10.98	13.34	3.02	PC, pyc; pyruvate carboxylase [EC:6.4.1.1]
Pyuvate->Succinate->Propionate	K01903	8.32	8.57	7.24	10.63	11.95	7.23	7.7	8.13	8.63	9.29	13.55	6.78	sucC; succinyl-CoA synthetase beta subunit [EC:6.2.1.5]
Pyuvate->Succinate->Propionate	K01678	12.55	9.8	9.98	9.75	11.11	11.55	9.07	9.46	9.95	7.95	10.67	4.54	E4.2.1.2AB, fumB; fumarate hydratase subunit beta [EC:4.2.1.2]
Pyuvate->Succinate->Propionate	K01677	14.74	13.85	12.21	13.22	12.71	12.85	10.62	13.41	12.72	11.49	14.83	6.59	E4.2.1.2AA, fumA; fumarate hydratase subunit alpha [EC:4.2.1.2]
Pyuvate->Succinate->Propionate	K01902	29.3	31	27.61	34.25	38.26	30.9	25.41	30.48	26.41	32.13	32.87	16.81	sucD; succinyl-CoA synthetase alpha subunit [EC:6.2.1.5]
Pyuvate->Succinate->Propionate	K01676	31.91	24.96	21.8	33.34	36.68	28.98	37.6	38.96	41.36	48.39	49.74	58.05	E4.2.1.2A, fumA, fumB; fumarate hydratase, class I [EC:4.2.1.2]
Pyuvate->Succinate->Propionate	K01966	34.67	33.55	29.7	43.52	46.82	35.68	28.55	37.53	32.56	46.03	40.19	37.11	PCCB, pccB; propionyl-CoA carboxylase beta chain [EC:6.4.1.3 2.1.3.15]
Pyuvate->Succinate->Propionate	K00024	35.87	25.98	22.8	34.35	34.61	30.81	95.3	55.43	132.55	82.83	173.26	183.25	mdh; malate dehydrogenase [EC:1.1.1.37]
Pyuvate->Succinate->Propionate	K01960	43.12	26.57	25.09	32.78	27.72	28.68	11.51	19.71	14.45	13.18	15.74	3.66	pycB; pyruvate carboxylase subunit B [EC:6.4.1.1]
Pyuvate->Succinate->Propionate	K00239	46.67	35.1	29.24	49.13	57.48	38.35	47.62	51.41	55.96	69.51	72.05	64.63	sdhA, frdA; succinate dehydrogenase / fumarate reductase, flavoprotein subunit [EC:1.3.5.1 1.3.5.4]
Pyuvate->Succinate->Propionate	K01847	62.43	53.51	48.14	65.91	65.61	56.7	54.05	58.96	60.1	70.45	71.72	76.13	MUT; methylmalonyl-CoA mutase [EC:5.4.99.2]
Pyuvate->Succinate->Propionate	K00240	114.35	107.47	109.02	138.54	137.48	125.8	183.43	171.98	204.29	208.22	218.33	264.74	sdhB, frdB; succinate dehydrogenase / fumarate reductase, iron-sulfur subunit [EC:1.3.5.1 1.3.5.4]
Pyuvate->Succinate->Propionate	K05606	126.41	94.59	87.47	107.28	99.28	106.96	93.65	102.96	93.12	108.98	87.44	123.6	MCEE, epi; methylmalonyl-CoA/ethylmalonyl-CoA epimerase [EC:5.1.99.1]
Starch->Glucose	K05343	0.37	0.34	0.41	0.19	0.19	0.27	0.14	0.09	0.35	0.15	0.23	0.19	treS; maltose alpha-D-glucosyltransferase / alpha-amylase [EC:5.4.99.16 3.2.1.1]
Starch->Glucose	K00701	0.38	0.17	0.22	0.13	0.8	0.4	0.43	0.36	0.39	0.34	0.54	0.56	cgt; cyclomaltodextrin glucanotransferase [EC:2.4.1.19]
Starch->Glucose	K05342	0.46	0.64	0.51	0.43	0.61	0.36	0.59	0.54	0.69	0.49	0.65	0.16	E2.4.1.64; alpha,alpha-trehalose phosphorylase [EC:2.4.1.64]
Starch->Glucose	K01214	0.49	0.37	0.66	0.55	0.45	0.61	0.67	0.86	0.68	0.58	0.72	0.79	ISA, treX; isoamylase [EC:3.2.1.68]
Starch->Glucose	K01208	2.75	4.17	4.61	5.07	4.86	4.4	2.93	4.17	3	4.66	3.53	2.65	cd, ma, nplT; cyclomaltodextrinase / maltogenic alpha-amylase / neopullulanase [EC:3.2.1.54 3.2.1.133 3.2.1.135]
Starch->Glucose	K01176	21.27	16.9	15.22	23.6	19.25	19.75	18.97	20.7	20.44	23.09	24	24.16	AMY, amyA, malS; alpha-amylase [EC:3.2.1.1]
Starch->Glucose	K00705	123.54	122.31	105.24	112.79	116.64	105.89	112.03	110.92	126.43	129.91	141.62	125.6	malQ; 4-alpha-glucanotransferase [EC:2.4.1.25]
Starch->Glucose	K01179	235.91	158.36	148.81	185.02	205.55	178.27	200.77	210.32	220.18	241.82	241.27	281.31	E3.2.1.4; endoglucanase [EC:3.2.1.4]
	ID	K01895	K01782	K00023	K07516	K00209	K17865	K01715	K00074	K00626	K00702	K00127	K08264	K13942	K05299	K22481	K22482	K11261	K14080	K22480	K00124	K00123	K01499	K04480	K14081	K11260	K00582	K00672	K00203	K22516	K00583	K00200	K00202	K00201	K00580	K00205	K00579	K00578	K00125	K00204	K03390	K00581	K03389	K00442	K00577	K00443	K00584	K00440	K03421
	con	0.57	0.6	1.06	2	3.04	8.76	98.35	262.01	476.22	43.64	0.21	0.53	1.31	2.87	2.87	4.38	5.31	5.97	6.29	11.7	23.49	55.09	82.12	83.71	87.97	111.99	137.68	145.03	168.18	178.09	187.89	202.56	204.66	241.16	243.49	259.02	261.79	284.28	324.75	324.89	351.73	359.6	359.87	424.06	429.91	451.93	519.78	522.9
	con	0.4	0.38	1.28	1.56	3.54	11.6	109.91	252.25	489.75	38.23	0.25	0.77	2.27	3.67	4.4	6.32	4.61	5.48	8.57	23.05	9.96	56.49	124.43	130.74	77.96	171.15	139.76	157.96	243.77	249.59	212.89	232.25	230.35	350.67	317.05	380.87	364.17	349.9	330.66	340.99	473.55	384.54	421.94	565.16	472.09	573.49	565.26	723.22
	con	0.23	0.61	1.04	1.36	2.95	9.64	105.25	230.07	426.09	33.25	0.32	0.87	1.96	3.06	4.21	5.25	4.21	6.64	6.8	18.29	11.07	53.36	126.72	128.54	65.75	119.19	132.33	136.72	197.52	195.59	177.78	216.33	180.35	265.28	257.33	275.14	277.06	309.97	312.01	286.43	375.55	337.68	341.96	426.99	401.87	451.68	469.7	558.43
	con	0.28	0.45	1.07	1.6	3.94	12.21	127.94	263.95	459.25	46.26	0.09	0.84	2.96	3.54	4.58	5.47	4.93	8.64	9.46	22.1	15.57	60.88	185.72	188.53	107.79	217.18	153.67	185.89	273.95	319.91	253.31	240.92	276.45	437.39	359.34	476.38	492.6	381.49	355.67	398.67	566.98	422.64	533.81	690.26	586.4	687.49	655.72	869.9
	con	1.27	1.54	3.68	2.82	7.12	14.16	134.97	284.92	548.62	54.27	0.9	1.15	2.62	4.37	3.77	6.66	3.38	7.67	11.83	29.39	14.08	67.73	153.11	165.46	128.54	342.96	165.74	215.01	332.74	381.75	284.78	296.9	344.64	589.23	462.18	648.15	641.6	477.38	406.82	492.09	695.71	520.17	781.66	1037.52	757.77	944.11	808.1	1274.18
	con	0.48	0.72	1.77	1.61	4.56	10.07	112.18	235.94	415.52	43.29	0.66	0.65	2.19	2.85	4.72	5.3	5.44	6.75	8.77	18.3	12.19	61.34	147.88	146.18	88.17	152.12	155.63	166.29	233.41	240.1	212.06	255.51	230.5	306.19	311.24	336.59	356.82	368.13	348.81	331.93	426.8	413.91	436.7	502.45	502.15	549.69	567.87	666.74
	3nop	0.35	0.52	1.52	1.39	6.46	10.05	97.57	209.31	455.18	50.75	0.34	1.54	5.05	3.94	1.13	1.39	3.17	3.05	2.52	13.76	13.51	32.06	69.93	64.2	67.17	63.95	80.22	105.98	203.17	102.39	130.35	141.73	132.35	158.26	158.73	168.23	149.05	336.84	190.33	187.35	203.93	246.15	222.21	246.73	249.02	259.01	297.25	434.27
	3nop	0.48	0.39	1.82	1.36	6.38	12.87	102.74	205.15	442.54	57.81	0.32	1.65	3.7	3.27	3.36	3.97	3.59	5.1	5.89	17.71	15.97	41.9	109.43	105.31	96.72	115.79	112.92	153.5	262.73	181.28	211.58	194.62	222.43	240.62	269.05	282.72	255.52	373.75	293.85	259.67	345.43	312.74	338.23	400.04	385.03	414.07	435.37	697.42
	3nop	0.4	0.42	1.75	1.14	7.93	15.37	110.27	276.9	517.13	58.26	0.21	1.91	8.63	6.62	1.26	1.92	3.24	2.51	2.01	18.11	13.72	37.14	80.28	79.06	84.48	87.13	99.75	126.38	315.51	135.11	158.98	147.4	160.7	197.39	187.08	224.58	176.88	465.98	227.09	253.6	270.41	303.18	266.11	312.66	278.8	303.25	332.96	558
	3nop	0.41	0.72	1.65	1.55	8.31	13.49	125.28	241.19	497.28	68.54	0.5	2.07	4.17	4.58	1.93	2.47	3.03	4.11	4.66	25.56	20.73	34.74	99.91	93.85	130.42	136.78	87.5	163.2	282.02	179.76	207.56	175.23	223.19	269.56	245.6	327.24	289.35	394.07	228.94	277.89	354.79	302.52	372.2	491.64	414.32	438.89	437.14	735.01
	3nop	0.54	0.95	1.76	2.04	8.95	19.34	158.37	370.29	679.86	69.46	0.62	3.23	10.55	8.9	0.87	1.85	3.63	3.66	2.66	26.41	40.53	38.9	110.2	108.5	162.15	160.93	106.61	192.73	369.31	164.16	213.27	174.77	236.16	285.34	252.17	362.03	293.55	538.65	235.29	381.33	392.47	346.82	417.55	596.57	434.4	469.03	481.84	795.13
	3nop	0.69	1.04	2.79	1.24	7.82	5.02	71.34	171.39	181.49	68.83	0.53	2.2	3.14	1.55	0.4	0.41	2.06	4.46	0.68	8.46	71.38	27.73	62.26	64.7	81.11	48.23	53.97	101.28	60.1	25.94	108.82	71.9	96.1	75.72	100.2	88.59	69.71	160.1	47.83	138.72	109.1	141.88	194.9	161.36	236.1	148.34	274.91	177.22
[truncated: 61 more columns]

## Sheet: Methanogenesis
id	ko00	1	2	3	4	5	6	13	14	15	16	17	18	A
Methanogenesis	K22516	168.18	243.77	197.52	273.95	332.74	233.41	203.17	262.73	315.51	282.02	369.31	60.1	fdhA; formate dehydrogenase (coenzyme F420) alpha subunit [EC:1.17.98.3 1.8.98.6]
Methanogenesis	K05299	2.87	3.67	3.06	3.54	4.37	2.85	3.94	3.27	6.62	4.58	8.9	1.55	fdhA; formate dehydrogenase (NADP+) alpha subunit [EC:1.17.1.10]
Methanogenesis	K00125	284.28	349.9	309.97	381.49	477.38	368.13	336.84	373.75	465.98	394.07	538.65	160.1	fdhB; formate dehydrogenase (coenzyme F420) beta subunit [EC:1.17.98.3 1.8.98.6]
Methanogenesis	K00123	23.49	9.96	11.07	15.57	14.08	12.19	13.51	15.97	13.72	20.73	40.53	71.38	fdoG, fdhF, fdwA; formate dehydrogenase major subunit [EC:1.17.1.9]
Methanogenesis	K00124	11.7	23.05	18.29	22.1	29.39	18.3	13.76	17.71	18.11	25.56	26.41	8.46	fdoH, fdsB; formate dehydrogenase iron-sulfur subunit
Methanogenesis	K00127	0.21	0.25	0.32	0.09	0.9	0.66	0.34	0.32	0.21	0.5	0.62	0.53	fdoI, fdsG; formate dehydrogenase subunit gamma
Methanogenesis	K00440	519.78	565.26	469.7	655.72	808.1	567.87	297.25	435.37	332.96	437.14	481.84	274.91	frhA; coenzyme F420 hydrogenase subunit alpha [EC:1.12.98.1]
Methanogenesis	K00441	682.51	709.06	615.88	833.34	1079.84	715.68	392.82	590.71	427.5	586.1	620.43	346.27	frhB; coenzyme F420 hydrogenase subunit beta [EC:1.12.98.1]
Methanogenesis	K00442	359.87	421.94	341.96	533.81	781.66	436.7	222.21	338.23	266.11	372.2	417.55	194.9	frhD; coenzyme F420 hydrogenase subunit delta
Methanogenesis	K00443	429.91	472.09	401.87	586.4	757.77	502.15	249.02	385.03	278.8	414.32	434.4	236.1	frhG; coenzyme F420 hydrogenase subunit gamma [EC:1.12.98.1]
Methanogenesis	K00672	137.68	139.76	132.33	153.67	165.74	155.63	80.22	112.92	99.75	87.5	106.61	53.97	ftr; formylmethanofuran--tetrahydromethanopterin N-formyltransferase [EC:2.3.1.101]
Methanogenesis	K00200	187.89	212.89	177.78	253.31	284.78	212.06	130.35	211.58	158.98	207.56	213.27	108.82	fwdA, fmdA; formylmethanofuran dehydrogenase subunit A [EC:1.2.7.12]
Methanogenesis	K00201	204.66	230.35	180.35	276.45	344.64	230.5	132.35	222.43	160.7	223.19	236.16	96.1	fwdB, fmdB; formylmethanofuran dehydrogenase subunit B [EC:1.2.7.12]
Methanogenesis	K00202	202.56	232.25	216.33	240.92	296.9	255.51	141.73	194.62	147.4	175.23	174.77	71.9	fwdC, fmdC; formylmethanofuran dehydrogenase subunit C [EC:1.2.7.12]
Methanogenesis	K00203	145.03	157.96	136.72	185.89	215.01	166.29	105.98	153.5	126.38	163.2	192.73	101.28	fwdD, fmdD; formylmethanofuran dehydrogenase subunit D [EC:1.2.7.12]
Methanogenesis	K11261	5.31	4.61	4.21	4.93	3.38	5.44	3.17	3.59	3.24	3.03	3.63	2.06	fwdE, fmdE; formylmethanofuran dehydrogenase subunit E [EC:1.2.7.12]
Methanogenesis	K00205	243.49	317.05	257.33	359.34	462.18	311.24	158.73	269.05	187.08	245.6	252.17	100.2	fwdF, fmdF; 4Fe-4S ferredoxin
Methanogenesis	K11260	87.97	77.96	65.75	107.79	128.54	88.17	67.17	96.72	84.48	130.42	162.15	81.11	fwdG; 4Fe-4S ferredoxin
Methanogenesis	K00204	324.75	330.66	312.01	355.67	406.82	348.81	190.33	293.85	227.09	228.94	235.29	47.83	fwdH; 4Fe-4S ferredoxin
Methanogenesis	K22480	6.29	8.57	6.8	9.46	11.83	8.77	2.52	5.89	2.01	4.66	2.66	0.68	hdrA1; heterodisulfide reductase subunit A1 [EC:1.8.7.3]
Methanogenesis	K03388	610.45	737.2	598.96	808.51	992.54	718.55	435.7	674.08	530.91	618.47	633.15	206.66	hdrA2; heterodisulfide reductase subunit A2 [EC:1.8.7.3 1.8.98.4 1.8.98.5 1.8.98.6]
Methanogenesis	K22481	2.87	4.4	4.21	4.58	3.77	4.72	1.13	3.36	1.26	1.93	0.87	0.4	hdrB1; heterodisulfide reductase subunit B1 [EC:1.8.7.3]
Methanogenesis	K03389	359.6	384.54	337.68	422.64	520.17	413.91	246.15	312.74	303.18	302.52	346.82	141.88	hdrB2; heterodisulfide reductase subunit B2 [EC:1.8.7.3 1.8.98.4 1.8.98.5 1.8.98.6]
Methanogenesis	K22482	4.38	6.32	5.25	5.47	6.66	5.3	1.39	3.97	1.92	2.47	1.85	0.41	hdrC1; heterodisulfide reductase subunit C1 [EC:1.8.7.3]
Methanogenesis	K03390	324.89	340.99	286.43	398.67	492.09	331.93	187.35	259.67	253.6	277.89	381.33	138.72	hdrC2; heterodisulfide reductase subunit C2 [EC:1.8.7.3 1.8.98.4 1.8.98.5 1.8.98.6]
Methanogenesis	K08264	0.53	0.77	0.87	0.84	1.15	0.65	1.54	1.65	1.91	2.07	3.23	2.2	hdrD; heterodisulfide reductase subunit D [EC:1.8.98.1]
Methanogenesis	K13942	1.31	2.27	1.96	2.96	2.62	2.19	5.05	3.7	8.63	4.17	10.55	3.14	hmd; 5,10-methenyltetrahydromethanopterin hydrogenase [EC:1.12.98.2]
Methanogenesis	K01499	55.09	56.49	53.36	60.88	67.73	61.34	32.06	41.9	37.14	34.74	38.9	27.73	mch; methenyltetrahydromethanopterin cyclohydrolase [EC:3.5.4.27]
Methanogenesis	K00399	1650.38	1755.63	1488.48	1857.6	2150.17	1631.76	764.65	1275.25	878.1	1197.98	1106.4	356.4	mcrA; methyl-coenzyme M reductase alpha subunit [EC:2.8.4.1]
Methanogenesis	K00401	1014.65	1185.39	980.05	1367.61	1666.76	1150.05	711.07	1075.21	851.44	1069.89	1037.86	347.11	mcrB; methyl-coenzyme M reductase beta subunit [EC:2.8.4.1]
Methanogenesis	K03421	522.9	723.22	558.43	869.9	1274.18	666.74	434.27	697.42	558	735.01	795.13	177.22	mcrC; methyl-coenzyme M reductase subunit C
Methanogenesis	K03422	768.58	906.35	760.99	1099.23	1471.72	888.67	513.79	821.59	621.32	885.88	1028.56	221.32	mcrD; methyl-coenzyme M reductase subunit D
Methanogenesis	K00402	864.77	1084.74	867.08	1223.68	1330.65	977.83	665.12	1037.23	789.33	1038.42	989.47	278.47	mcrG; methyl-coenzyme M reductase gamma subunit [EC:2.8.4.1]
Methanogenesis	K00320	1467.29	1689.03	1503.84	1617.14	1674.16	1703.24	1316.16	1522.25	1545.26	1228.55	1403.07	783.35	mer; 5,10-methylenetetrahydromethanopterin reductase [EC:1.5.98.2]
Methanogenesis	K14080	5.97	5.48	6.64	8.64	7.67	6.75	3.05	5.1	2.51	4.11	3.66	4.46	mtaA; [methyl-Co(III) methanol-specific corrinoid protein]:coenzyme M methyltransferase [EC:2.1.1.246]
Methanogenesis	K14082	12.2553	13.2788	14.4803	22.9264	27.2696	21.3244	23.852	28.2308	26.7534	27.3586	22.6861	24.91	mtbA;[methyl-Co(III) methylamine-specific corrinoid protein]:coenzyme M methyltransferase [EC:2.1.1.247]
Methanogenesis	K04480	82.12	124.43	126.72	185.72	153.11	147.88	69.93	109.43	80.28	99.91	110.2	62.26	mtaB; methanol---5-hydroxybenzimidazolylcobamide Co-methyltransferase [EC:2.1.1.90]
Methanogenesis	K14081	83.71	130.74	128.54	188.53	165.46	146.18	64.2	105.31	79.06	93.85	108.5	64.7	mtaC; methanol corrinoid protein
Methanogenesis	K00319	1098.08	1145.78	990.7	1170.71	1305.61	1163.53	595.64	841.68	664.86	665.63	664.17	338.02	mtd; methylenetetrahydromethanopterin dehydrogenase [EC:1.5.98.1]
Methanogenesis	K00577	424.06	565.16	426.99	690.26	1037.52	502.45	246.73	400.04	312.66	491.64	596.57	161.36	mtrA; tetrahydromethanopterin S-methyltransferase subunit A [EC:2.1.1.86]
Methanogenesis	K00578	261.79	364.17	277.06	492.6	641.6	356.82	149.05	255.52	176.88	289.35	293.55	69.71	mtrB; tetrahydromethanopterin S-methyltransferase subunit B [EC:2.1.1.86]
Methanogenesis	K00579	259.02	380.87	275.14	476.38	648.15	336.59	168.23	282.72	224.58	327.24	362.03	88.59	mtrC; tetrahydromethanopterin S-methyltransferase subunit C [EC:2.1.1.86]
Methanogenesis	K00580	241.16	350.67	265.28	437.39	589.23	306.19	158.26	240.62	197.39	269.56	285.34	75.72	mtrD; tetrahydromethanopterin S-methyltransferase subunit D [EC:2.1.1.86]
Methanogenesis	K00581	351.73	473.55	375.55	566.98	695.71	426.8	203.93	345.43	270.41	354.79	392.47	109.1	mtrE; tetrahydromethanopterin S-methyltransferase subunit E [EC:2.1.1.86]
Methanogenesis	K00582	111.99	171.15	119.19	217.18	342.96	152.12	63.95	115.79	87.13	136.78	160.93	48.23	mtrF; tetrahydromethanopterin S-methyltransferase subunit F [EC:2.1.1.86]
Methanogenesis	K00583	178.09	249.59	195.59	319.91	381.75	240.1	102.39	181.28	135.11	179.76	164.16	25.94	mtrG; tetrahydromethanopterin S-methyltransferase subunit G [EC:2.1.1.86]
Methanogenesis	K00584	451.93	573.49	451.68	687.49	944.11	549.69	259.01	414.07	303.25	438.89	469.03	148.34	mtrH; tetrahydromethanopterin S-methyltransferase subunit H [EC:2.1.1.86]

## Sheet: Acetogenic（WL）
ID	con	con	con	con	con	con	3-nop	3-nop	3-nop	3-nop	3-nop	3-nop
K05299	2.87	3.67	3.06	3.54	4.37	2.85	3.94	3.27	6.62	4.58	8.9	1.55	fdhA; formate dehydrogenase (NADP+) alpha subunit [EC:1.17.1.10]
K01938	20.3	21.63	20.16	21.17	24.65	19.94	18.63	19.75	21.43	21.5	30.23	12.75	fhs; formate--tetrahydrofolate ligase [EC:6.3.4.3]
K01491	39.77	31.05	31.82	43.5	45.66	40.6	37.96	43.72	37.41	53.09	46.93	53.95	folD; methylenetetrahydrofolate dehydrogenase (NADP+) / methenyltetrahydrofolate cyclohydrolase [EC:1.5.1.5 3.5.4.9]
K00297	23.01	19.46	18.98	23.04	21.4	20.2	30.75	27.39	36.64	28.91	40.43	29.73	metF, MTHFR; methylenetetrahydrofolate reductase (NADPH) [EC:1.5.1.20]
K15023	34.27	36.67	30.92	33.27	38.91	35.33	40.42	38.09	53.02	36.43	69.19	24.29	acsE; 5-methyltetrahydrofolate corrinoid/iron sulfur protein methyltransferase [EC:2.1.1.258]
K00198	4.93	6.33	5.89	6.36	5.7	5.16	8.48	8.63	9.46	7.83	16.45	4.42	cooS, acsA; anaerobic carbon-monoxide dehydrogenase catalytic subunit [EC:1.2.7.4]
K00194	5.16	6.16	6.01	6.66	6.49	5.32	8.72	8	11.62	7.64	17.76	5.15	cdhD, acsD; acetyl-CoA decarbonylase/synthase, CODH/ACS complex subunit delta [EC:2.1.1.245]
K00197	3.1	3.33	3.84	4.46	3.27	3.1	4.83	4.55	7.35	4.94	14	3.74	cdhE, acsC; acetyl-CoA decarbonylase/synthase, CODH/ACS complex subunit gamma [EC:2.1.1.245]
K00195	0.69	0.59	0.31	0.75	0.51	0.39	0.03	0	0	0.03	0	0.03	cdhB; anaerobic carbon-monoxide dehydrogenase, CODH/ACS complex subunit epsilon

## Sheet: significance
Pathway	ID	gene	3-NOP	CON	SEM	p-value
Acetate->Butyrate	K00074	paaH, hbd, fadB, mmgB; 3-hydroxybutyryl-CoA dehydrogenase [EC:1.1.1.157]	245.705	254.857	37.0705	0.4233
Acetate->Butyrate	K00626	E2.3.1.9, atoB; acetyl-CoA C-acetyltransferase [EC:2.3.1.9]	462.247	469.242	85.7241	0.7488
Acetate->Butyrate	K01715	crt; enoyl-CoA hydratase [EC:4.2.1.17]	110.928	114.767	17.6224	0.5218
Acetate->Butyrate	K01782	fadJ; 3-hydroxyacyl-CoA dehydrogenase / enoyl-CoA hydratase / 3-hydroxybutyryl-CoA epimerase [EC:1.1.1.35 4.2.1.17 5.1.2.3]	0.673333	0.716667	0.2847	0.9361
Acetate->Butyrate	K01895	ACSS1_2, acs; acetyl-CoA synthetase [EC:6.2.1.1]	0.478333	0.538333	0.20529	0.7479
Acetate->Butyrate	K00023	phbB; acetoacetyl-CoA reductase [EC:1.1.1.36]	1.88167	1.65	0.60814	0.2002
Acetate->Butyrate	K17865	croR; 3-hydroxybutyryl-CoA dehydratase [EC:4.2.1.55]	12.69	11.0733	2.78864	0.3367
Acetate->Butyrate	K07516	fadN; 3-hydroxyacyl-CoA dehydrogenase [EC:1.1.1.35]	1.45333	1.825	0.3467	0.0921
Acetate->Butyrate	K00209	fabV, ter; enoyl-[acyl-carrier protein] reductase / trans-2-enoyl-CoA reductase (NAD+) [EC:1.3.1.9 1.3.1.44]	7.64167	4.19167	1.053	0.0104
Methanogenesis	K00124	fdoH, fdsB; formate dehydrogenase iron-sulfur subunit	18.335	20.4717	5.22348	0.4233
Methanogenesis	K00200	fwdA, fmdA; formylmethanofuran dehydrogenase subunit A [EC:1.2.7.12]	171.76	221.452	35.1992	0.1093
Methanogenesis	K00201	fwdB, fmdB; formylmethanofuran dehydrogenase subunit B [EC:1.2.7.12]	178.488	244.492	47.3514	0.1093
Methanogenesis	K00203	fwdD, fmdD; formylmethanofuran dehydrogenase subunit D [EC:1.2.7.12]	140.512	167.817	26.2857	0.2002
Methanogenesis	K00402	mcrG; methyl-coenzyme M reductase gamma subunit [EC:2.8.4.1]	799.673	1058.12	199.055	0.1495
Methanogenesis	K03421	mcrC; methyl-coenzyme M reductase subunit C	566.175	769.228	207.289	0.3367
Methanogenesis	K03422	mcrD; methyl-coenzyme M reductase subunit D	682.077	982.59	228.982	0.1093
Methanogenesis	K00123	fdoG, fdhF, fdwA; formate dehydrogenase major subunit [EC:1.17.1.9]	29.3067	14.3933	11.3791	0.1093
Methanogenesis	K00125	fdhB; formate dehydrogenase (coenzyme F420) beta subunit [EC:1.17.98.3 1.8.98.6]	378.232	361.858	80.0603	0.5218
Methanogenesis	K00127	fdoI, fdsG; formate dehydrogenase subunit gamma	0.42	0.405	0.18928	0.6298
Methanogenesis	K05299	fdhA; formate dehydrogenase (NADP+) alpha subunit [EC:1.17.1.10]	4.81	3.39333	1.30194	0.2002
Methanogenesis	K11260	fwdG; 4Fe-4S ferredoxin	103.675	92.6967	23.7245	0.631
Methanogenesis	K22516	fdhA; formate dehydrogenase (coenzyme F420) alpha subunit [EC:1.17.98.3 1.8.98.6]	248.807	241.595	67.5896	0.5218
Methanogenesis	K00202	fwdC, fmdC; formylmethanofuran dehydrogenase subunit C [EC:1.2.7.12]	150.942	240.745	31.2484	0.0039
Methanogenesis	K00204	fwdH; 4Fe-4S ferredoxin	203.888	346.453	47.7636	0.0039
Methanogenesis	K00205	fwdF, fmdF; 4Fe-4S ferredoxin	202.138	325.105	59.0806	0.025
Methanogenesis	K00319	mtd; methylenetetrahydromethanopterin dehydrogenase [EC:1.5.98.1]	628.333	1145.73	109.007	0.0039
Methanogenesis	K00320	mer; 5,10-methylenetetrahydromethanopterin reductase [EC:1.5.98.2]	1299.77	1609.12	155.502	0.025
Methanogenesis	K00399	mcrA; methyl-coenzyme M reductase alpha subunit [EC:2.8.4.1]	929.797	1755.67	232.967	0.0039
Methanogenesis	K00401	mcrB; methyl-coenzyme M reductase beta subunit [EC:2.8.4.1]	848.763	1227.42	220.798	0.0547
Methanogenesis	K00440	frhA; coenzyme F420 hydrogenase subunit alpha [EC:1.12.98.1]	376.578	597.738	83.9942	0.0065
Methanogenesis	K00441	frhB; coenzyme F420 hydrogenase subunit beta [EC:1.12.98.1]	493.972	772.718	116.242	0.0065
Methanogenesis	K00442	frhD; coenzyme F420 hydrogenase subunit delta	301.867	479.323	102.414	0.025
Methanogenesis	K00443	frhG; coenzyme F420 hydrogenase subunit gamma [EC:1.12.98.1]	332.945	525.032	89.4252	0.0163
Methanogenesis	K00577	mtrA; tetrahydromethanopterin S-methyltransferase subunit A [EC:2.1.1.86]	368.167	607.74	160.595	0.0547
Methanogenesis	K00578	mtrB; tetrahydromethanopterin S-methyltransferase subunit B [EC:2.1.1.86]	205.677	399.007	95.3558	0.025
Methanogenesis	K00579	mtrC; tetrahydromethanopterin S-methyltransferase subunit C [EC:2.1.1.86]	242.232	396.025	101.646	0.0782
Methanogenesis	K00580	mtrD; tetrahydromethanopterin S-methyltransferase subunit D [EC:2.1.1.86]	204.482	364.987	85.1262	0.025
Methanogenesis	K00581	mtrE; tetrahydromethanopterin S-methyltransferase subunit E [EC:2.1.1.86]	279.355	481.72	96.8341	0.0163
Methanogenesis	K00582	mtrF; tetrahydromethanopterin S-methyltransferase subunit F [EC:2.1.1.86]	102.135	185.765	52.8117	0.0547
Methanogenesis	K00583	mtrG; tetrahydromethanopterin S-methyltransferase subunit G [EC:2.1.1.86]	131.44	260.838	55.9126	0.0104
Methanogenesis	K00584	mtrH; tetrahydromethanopterin S-methyltransferase subunit H [EC:2.1.1.86]	338.765	609.732	126.376	0.0104
Methanogenesis	K00672	ftr; formylmethanofuran--tetrahydromethanopterin N-formyltransferase [EC:2.3.1.101]	90.1617	147.468	13.9874	0.0039
Methanogenesis	K01499	mch; methenyltetrahydromethanopterin cyclohydrolase [EC:3.5.4.27]	35.4117	59.1483	4.21372	0.0039
Methanogenesis	K03388	hdrA2; heterodisulfide reductase subunit A2 [EC:1.8.7.3 1.8.98.4 1.8.98.5 1.8.98.6]	516.495	744.368	130.382	0.0547
Methanogenesis	K03389	hdrB2; heterodisulfide reductase subunit B2 [EC:1.8.7.3 1.8.98.4 1.8.98.5 1.8.98.6]	275.548	406.423	56.0635	0.0065
Methanogenesis	K03390	hdrC2; heterodisulfide reductase subunit C2 [EC:1.8.7.3 1.8.98.4 1.8.98.5 1.8.98.6]	249.76	362.5	63.715	0.025
Methanogenesis	K04480	mtaB; methanol---5-hydroxybenzimidazolylcobamide Co-methyltransferase [EC:2.1.1.90]	88.6683	136.663	22.6189	0.0163
Methanogenesis	K11261	fwdE, fmdE; formylmethanofuran dehydrogenase subunit E [EC:1.2.7.12]	3.12	4.64667	0.54644	0.0104
Methanogenesis	K14080	mtaA; [methyl-Co(III) methanol-specific corrinoid protein]:coenzyme M methyltransferase [EC:2.1.1.246]	3.815	6.85833	0.85424	0.0039
Methanogenesis	K14081	mtaC; methanol corrinoid protein	85.9367	140.527	22.6305	0.0163
Methanogenesis	K22480	hdrA1; heterodisulfide reductase subunit A1 [EC:1.8.7.3]	3.07	8.62	1.58191	0.0039
Methanogenesis	K22481	hdrB1; heterodisulfide reductase subunit B1 [EC:1.8.7.3]	1.49167	4.09167	0.70523	0.0065
Methanogenesis	K22482	hdrC1; heterodisulfide reductase subunit C1 [EC:1.8.7.3]	2.00167	5.56333	0.81836	0.0039
Methanogenesis	K08264	hdrD; heterodisulfide reductase subunit D [EC:1.8.98.1]	2.1	0.801667	0.33431	0.0039
Methanogenesis	K13942	hmd; 5,10-methenyltetrahydromethanopterin hydrogenase [EC:1.12.98.2]	5.87333	2.21833	1.45948	0.0039
Pyruvate->Acetate	K00925	ackA; acetate kinase [EC:2.7.2.1]	276.842	292.872	24.4623	0.4233
Pyruvate->Acetate	K01034	atoD; acetate CoA/acetoacetate CoA-transferase alpha subunit [EC:2.8.3.8 2.8.3.9]	101.467	101.572	13.6417	0.7488
Pyruvate->Acetate	K00174	korA, oorA, oforA; 2-oxoglutarate/2-oxoacid ferredoxin oxidoreductase subunit alpha [EC:1.2.7.3 1.2.7.11]	187.302	246.872	33.2015	0.0547
Pyruvate->Acetate	K00175	korB, oorB, oforB; 2-oxoglutarate/2-oxoacid ferredoxin oxidoreductase subunit beta [EC:1.2.7.3 1.2.7.11]	161.193	221.962	27.1304	0.0163
Pyruvate->Acetate	K00625	E2.3.1.8, pta; phosphate acetyltransferase [EC:2.3.1.8]	30.4783	40.2933	3.29681	0.0065
Pyruvate->Acetate	K01035	atoA; acetate CoA/acetoacetate CoA-transferase beta subunit [EC:2.8.3.8 2.8.3.9]	40.9067	61.9283	5.02479	0.0039
Pyruvate->Butyrate	K00074	paaH, hbd, fadB, mmgB; 3-hydroxybutyryl-CoA dehydrogenase [EC:1.1.1.157]	245.705	254.857	37.0705	0.4233
Pyruvate->Butyrate	K00626	E2.3.1.9, atoB; acetyl-CoA C-acetyltransferase [EC:2.3.1.9]	462.247	469.242	85.7241	0.7488
Pyruvate->Butyrate	K01034	atoD; acetate CoA/acetoacetate CoA-transferase alpha subunit [EC:2.8.3.8 2.8.3.9]	101.467	101.572	13.6417	0.7488
Pyruvate->Butyrate	K01692	paaF, echA; enoyl-CoA hydratase [EC:4.2.1.17]	8.20833	9.05167	2.31093	0.3367
Pyruvate->Butyrate	K01715	crt; enoyl-CoA hydratase [EC:4.2.1.17]	110.928	114.767	17.6224	0.5218
Pyruvate->Butyrate	K00023	phbB; acetoacetyl-CoA reductase [EC:1.1.1.36]	1.88167	1.65	0.60814	0.2002
Pyruvate->Butyrate	K17865	croR; 3-hydroxybutyryl-CoA dehydratase [EC:4.2.1.55]	12.69	11.0733	2.78864	0.3367
Pyruvate->Butyrate	K00169	porA; pyruvate ferredoxin oxidoreductase alpha subunit [EC:1.2.7.1]	63.795	120.698	15.94	0.0039
Pyruvate->Butyrate	K00170	porB; pyruvate ferredoxin oxidoreductase beta subunit [EC:1.2.7.1]	75.3367	166.867	17.5097	0.0039
Pyruvate->Butyrate	K00171	porD; pyruvate ferredoxin oxidoreductase delta subunit [EC:1.2.7.1]	35.0167	68.8567	8.9334	0.0039
Pyruvate->Butyrate	K00172	porG; pyruvate ferredoxin oxidoreductase gamma subunit [EC:1.2.7.1]	43.605	98.2683	9.21502	0.0039
Pyruvate->Butyrate	K00174	korA, oorA, oforA; 2-oxoglutarate/2-oxoacid ferredoxin oxidoreductase subunit alpha [EC:1.2.7.3 1.2.7.11]	187.302	246.872	33.2015	0.0547
Pyruvate->Butyrate	K00175	korB, oorB, oforB; 2-oxoglutarate/2-oxoacid ferredoxin oxidoreductase subunit beta [EC:1.2.7.3 1.2.7.11]	161.193	221.962	27.1304	0.0163
Pyruvate->Butyrate	K00634	ptb; phosphate butyryltransferase [EC:2.3.1.19]	5.14833	10.3633	1.57797	0.0039
Pyruvate->Butyrate	K00929	buk; butyrate kinase [EC:2.7.2.7]	49.21	68.5433	6.01817	0.0039
Pyruvate->Butyrate	K01035	atoA; acetate CoA/acetoacetate CoA-transferase beta subunit [EC:2.8.3.8 2.8.3.9]	40.9067	61.9283	5.02479	0.0039
Pyuvate->Lacate->Propionate	K00248	ACADS, bcd; butyryl-CoA dehydrogenase [EC:1.3.8.1]	188.598	215.8	34.9336	0.2623
Pyuvate->Lacate->Propionate	K00249	ACADM, acd; acyl-CoA dehydrogenase [EC:1.3.8.7]	20.0917	22.6717	5.06297	0.3367
Pyuvate->Lacate->Propionate	K01026	pct; propionate CoA-transferase [EC:2.8.3.1]	35.3083	43.525	6.62126	0.1093
Pyuvate->Lacate->Propionate	K00016	LDH, ldh; L-lactate dehydrogenase [EC:1.1.1.27]	35.2333	27.2383	3.0785	0.0104
Pyuvate->Lacate->Propionate	K20626	lcdA; lactoyl-CoA dehydratase subunit alpha [EC:4.2.1.54]	6.53167	0	2.90796	0.0074
Pyuvate->Lacate->Propionate	K20627	lcdB; lactoyl-CoA dehydratase subunit beta [EC:4.2.1.54]	10.425	0	4.24312	0.0021
Pyuvate->Succinate->Propionate	K01677	E4.2.1.2AA, fumA; fumarate hydratase subunit alpha [EC:4.2.1.2]	11.61	13.2633	1.53983	0.3367
Pyuvate->Succinate->Propionate	K01902	sucD; succinyl-CoA synthetase alpha subunit [EC:6.2.1.5]	27.3517	31.8867	4.00101	0.2002
Pyuvate->Succinate->Propionate	K01966	PCCB, pccB; propionyl-CoA carboxylase beta chain [EC:6.4.1.3 2.1.3.15]	36.995	37.3233	5.12069	1
Pyuvate->Succinate->Propionate	K05606	MCEE, epi; methylmalonyl-CoA/ethylmalonyl-CoA epimerase [EC:5.1.99.1]	101.625	103.665	10.8963	0.631
Pyuvate->Succinate->Propionate	K00026	MDH2; malate dehydrogenase [EC:1.1.1.37]	2.79667	2.16333	0.54886	0.2002
Pyuvate->Succinate->Propionate	K01847	MUT; methylmalonyl-CoA mutase [EC:5.4.99.2]	65.235	58.7167	6.47512	0.2002
Pyuvate->Succinate->Propionate	K01899	LSC1; succinyl-CoA synthetase alpha subunit [EC:6.2.1.4 6.2.1.5]	4.03667	3.23833	1.00473	0.2623
Pyuvate->Succinate->Propionate	K01903	sucC; succinyl-CoA synthetase beta subunit [EC:6.2.1.5]	9.01333	8.99	1.75089	1
Pyuvate->Succinate->Propionate	K01958	PC, pyc; pyruvate carboxylase [EC:6.4.1.1]	8.81333	8.04833	1.74395	0.5218
Pyuvate->Succinate->Propionate	K01678	E4.2.1.2AB, fumB; fumarate hydratase subunit beta [EC:4.2.1.2]	8.60667	10.79	1.35925	0.0374
Pyuvate->Succinate->Propionate	K01960	pycB; pyruvate carboxylase subunit B [EC:6.4.1.1]	13.0417	30.66	4.90014	0.0039
Pyuvate->Succinate->Propionate	K18118	aarC, cat1; succinyl-CoA:acetate CoA-transferase [EC:2.8.3.18]	70.5033	44.7083	7.9169	0.0039
Pyuvate->Succinate->Propionate	K00024	mdh; malate dehydrogenase [EC:1.1.1.37]	120.437	30.7367	23.1005	0.0039
Pyuvate->Succinate->Propionate	K00239	sdhA, frdA; succinate dehydrogenase / fumarate reductase, flavoprotein subunit [EC:1.3.5.1 1.3.5.4]	60.1967	42.6617	8.30002	0.025
Pyuvate->Succinate->Propionate	K00240	sdhB, frdB; succinate dehydrogenase / fumarate reductase, iron-sulfur subunit [EC:1.3.5.1 1.3.5.4]	208.498	122.11	18.8892	0.0039
Pyuvate->Succinate->Propionate	K01676	E4.2.1.2A, fumA, fumB; fumarate hydratase, class I [EC:4.2.1.2]	45.6833	29.6117	5.44592	0.0039
Pyuvate->Succinate->Propionate	K01679	E4.2.1.2B, fumC, FH; fumarate hydratase, class II [EC:4.2.1.2]	16.7167	9.52667	2.24142	0.0065
Starch->Glucose	K01208	cd, ma, nplT; cyclomaltodextrinase / maltogenic alpha-amylase / neopullulanase [EC:3.2.1.54 3.2.1.133 3.2.1.135]	3.49	4.31	0.65925	0.1275
Starch->Glucose	K00701	cgt; cyclomaltodextrin glucanotransferase [EC:2.4.1.19]	0.436667	0.35	0.1386	0.2623
Starch->Glucose	K00705	malQ; 4-alpha-glucanotransferase [EC:2.4.1.25]	124.418	114.402	7.93061	0.1093
Starch->Glucose	K01176	AMY, amyA, malS; alpha-amylase [EC:3.2.1.1]	21.8933	19.3317	2.10173	0.1495
Starch->Glucose	K05342	E2.4.1.64; alpha,alpha-trehalose phosphorylase [EC:2.4.1.64]	0.52	0.501667	0.12173	0.4233
Starch->Glucose	K05343	treS; maltose alpha-D-glucosyltransferase / alpha-amylase [EC:5.4.99.16 3.2.1.1]	0.191667	0.295	0.0752	0.0761
Starch->Glucose	K00702	E2.4.1.20; cellobiose phosphorylase [EC:2.4.1.20]	62.275	43.1567	6.09666	0.0065
Starch->Glucose	K01179	E3.2.1.4; endoglucanase [EC:3.2.1.4]	232.612	185.32	24.838	0.025
Starch->Glucose	K01214	ISA, treX; isoamylase [EC:3.2.1.68]	0.716667	0.521667	0.0836	0.0104

## Sheet: Total
Pathway	CON	CON	CON	CON	CON	CON	3-NOP	3-NOP	3-NOP	3-NOP	3-NOP	3-NOP	Pathway	3-NOP	3-NOP-SD	CON	CON-SD	SEM	P-VALUE
Acetate->Butyrate	852.61	870.67	777.24	870.69	999.1	782.85	782.35	773.73	931.31	889.88	1242.1	442.82	Acetate->Butyrate	843.698	259.96	858.86	80.53	139	0.8728
Methanogenesis	15225.8	17923.4	14945.9	20434.9	25173.3	17532.3	10145.2	15014.2	12238.8	14758	15905.9	5899.69	Methanogenesis	12327	3795.21	18539.3	3818.08	3108.11	0.0163
Pyruvate->Acetate	1073.19	960.84	838.89	1083.18	1177.51	927.63	725.39	882.67	831.59	997.64	1047.7	727.16	Pyruvate->Acetate	868.692	134.767	1010.21	123.197	105.31	0.0782
Pyruvate->Butyrate	2058.05	1971.74	1761.83	2155.68	2352.47	1859.65	1422.3	1628.56	1637.31	1819.62	2146.38	973.67	Pyruvate->Butyrate	1604.64	393.118	2026.57	212.051	247.06	0.0374
Pyuvate->Lacate->Propionate	288.34	314.72	272.61	330.69	368.29	280.76	235.17	260.44	322.64	304.08	452.59	202.21	Pyuvate->Lacate->Propionate	296.188	88.382	309.235	36.24	50.88	0.4233
Pyuvate->Succinate->Propionate	579.4	487.53	451.04	596.53	606.96	538.89	630.56	631.42	723.08	745.96	837.66	875.26	Pyuvate->Succinate->Propionate	740.657	101.901	543.392	62.978	67.31	0.0039
Starch->Glucose	428.81	341.49	308.93	374.04	402.62	353.24	387.28	405.77	430.42	469.58	482.02	504.25	Starch->Glucose	446.553	45.943	368.188	43.226	36.4	0.0163
