# Supplementary material for: Metatranscriptomic changes in the propionate pathway and carbohydrate enzyme revealed the rebalancing mechanism of rumen microbiota after CH4 inhibition by 3-NOP
Source: Research Square preprint supplement (doi:10.21203/rs.3.rs-7121971/v1), 2025-08-11
Supplement: Supplementary file 10 [file fea9116db37270098ff25a78.xlsx]

## Sheet: protozoa-contig
TREATMENT	3-NOP	3-NOP	3-NOP	3-NOP	3-NOP	3-NOP	CON	CON	CON	CON	CON	CON
CYR10.12825	16.7523	12.2462	18.7609	15.133	12.8233	14.9665	6.46946	5.10719	2.28636	3.64979	3.4635	3.56476
CYR10.13188	8.29186	9.72072	9.28604	8.22723	9.54782	8.35567	3.13404	4.50977	3.69199	7.2716	5.10203	4.90067
CYR10.16168	26.2515	13.7376	43.2003	20.1754	29.177	31.0365	8.51655	8.62113	7.65782	9.14025	7.21814	8.56539
CYR10.18175	85.8429	70.4162	101.555	54.3472	52.4157	98.6622	45.7748	34.1013	36.3952	42.4425	25.9761	51.8208
CYR10.33643	15.7468	15.1443	21.9749	17.8666	16.6955	15.2216	7.67611	10.084	8.5673	13.8349	12.8821	14.8336
CYR10.37546	39.2072	24.5262	34.2771	30.1668	16.2841	11.9512	38.3144	29.3542	23.4204	28.2734	21.0154	25.4203
CYR10.38408	13.4403	15.7704	21.3538	13.3397	13.7744	24.535	4.48234	4.16083	4.88387	6.93216	2.62668	4.06011
CYR10.48325	17.5012	19.929	18.553	19.256	13.6203	17.5925	28.8036	11.9444	14.0616	16.621	13.8016	15.2385
CYR10.58086	19.5911	20.295	28.698	22.2248	21.7318	21.4889	5.34269	11.4457	10.6624	15.6121	10.8779	13.3836
CYR10.58481	7.02671	26.9485	12.0165	8.72019	4.22509	7.04839	9.85181	3.6915	48.6125	3.90038	1.46518	18.8029
CYR10.59712	736.874	882.978	1306.29	736.184	1385.71	261.342	1060.06	1445.3	1106.41	1352.88	1070.72	967.826
CYR10.61157	7.07513	7.87663	12.1182	8.03898	7.5527	14.736	3.16854	2.27971	2.9861	3.92759	2.18098	2.40653
CYR10.71446	104.361	98.511	140.966	88.9665	92.1725	104.738	39.3164	61.9651	49.7786	78.8439	63.6221	85.332
CYR10.73922	16.3938	18.114	18.7303	13.6542	16.9299	17.4617	6.47797	11.2879	6.89927	13.2532	10.317	13.0111
CYR10.78435	130.987	121.856	173.759	115.271	115.375	139.816	66.482	63.2541	57.0771	81.92	63.8715	83.3352
CYR10.79537	127.283	79.4735	98.5492	94.1587	55.4497	83.3238	53.4542	35.7054	38.6643	46.3581	26.7377	48.1539
CYR10.82866	11.9584	9.93494	13.7312	9.93783	10.4372	13.6954	6.09323	2.74083	1.81426	2.4358	4.09847	3.66419
CYR10.88481	56.4378	27.4168	51.0194	30.1442	15.1434	57.8847	10.833	4.33408	4.03901	3.59613	3.09047	6.81011
CYR10.100938	91.7227	93.4479	101.368	52.0457	46.4906	69.8853	72.1268	80.2266	63.1272	61.6286	36.3352	73.1344
CYR10.103317	13.3164	11.6137	16.2221	10.4871	9.5985	14.6051	4.78341	5.68412	4.46725	10.2879	7.96089	10.0039
CYR10.110527	18.4109	15.8594	33.1294	26.4737	30.7814	22.7777	5.97907	3.90284	5.20286	9.00738	7.07735	5.95826
CYR10.120709	11.2479	10.1641	14.13	9.28791	9.83353	11.0304	5.15705	6.35467	5.07984	7.04105	5.2964	7.21921
CYR10.130544	137.991	157.025	255.237	125.419	157.48	22.136	153.042	180.949	143.719	134.627	91.2644	109.799
CYR10.130948	10.0102	6.69163	11.3705	9.10897	8.16013	10.4326	4.13484	2.13236	2.04042	2.4828	2.24819	3.34811
CYR10.135430	20.8211	21.7064	28.8786	17.8392	20.1214	3.88551	3.55618	7.51589	5.8671	6.34526	3.65227	4.90905
CYR10.138628	22.6304	21.9633	24.209	18.7432	15.7748	21.0367	6.89389	13.5807	9.06046	15.805	11.9478	16.6875
CYR10.147714	47.5534	26.3067	54.1105	41.2959	58.4239	60.0297	15.4472	10.0349	13.0797	12.9395	10.9718	12.5804
CYR10.151150	7.72281	6.5793	12.1244	5.69745	6.66813	11.9566	1.96416	2.76747	2.88353	4.03441	3.44611	5.95742
CYR10.152813	5.68524	8.47449	3.06332	10.2282	3.02409	5.94615	3.64896	4.68432	2.57133	6.35939	1.56148	2.76688
CYR10.157670	27.3586	18.3029	30.7436	16.5944	17.2191	32.4198	15.5905	9.71319	8.54128	9.58513	4.52033	8.53688
CYR10.159083	16.3314	17.6228	22.9205	16.8551	15.9301	19.2103	31.3977	12.5998	15.2361	15.4274	13.1362	17.0328
CYR10.174810	5.81055	6.69057	5.82226	6.15473	7.11538	6.57629	6.06843	5.37449	4.62535	3.82032	13.5778	4.3082
CYR10.175761	31.4623	26.3674	46.9795	20.3277	32.4462	19.6645	4.55282	11.6808	8.82442	7.81622	7.78145	12.6516
CYR10.177305	205.774	352.885	227.312	208.651	95.6431	244.45	90.67	189.946	177.709	199.957	77.9854	175.276
CYR10.178714	165.891	91.3339	207.507	82.1254	98.1154	179.308	85.118	51.025	56.6723	60.0885	34.9949	59.7657
CYR10.183442	219.295	221.741	297.552	207.66	261.809	173.972	192.455	216.607	202.422	253.817	194.208	207.995
CYR10.188507	29.1253	31.3511	39.6439	26.9407	28.4151	31.5374	13.4384	21.2858	15.4734	26.307	17.1392	23.2999
CYR10.189430	64.3438	67.2486	64.052	53.2045	27.134	85.212	24.3198	50.1578	41.602	39.9493	20.6784	41.1373
CYR10.195153	180.553	202.627	263.287	178.686	195.002	202.338	80.7535	124.814	101.154	154.354	128.267	138.801
CYR10.197043	5.52982	5.08178	6.26836	5.21795	3.75651	5.67172	10.3995	4.30961	3.92584	4.96891	3.80884	3.693
CYR10.201134	17.9845	10.882	21.9718	15.4556	11.847	17.7091	5.2085	2.57061	1.77738	2.50561	1.9493	3.27488
CYR11.1583	10.6639	12.4739	15.3547	11.9066	13.9982	12.2608	2.36381	4.78237	4.66768	8.08085	6.72283	7.25443
CYR11.12723	18.0078	18.9902	17.3989	18.2138	8.39522	29.6404	8.20764	11.2824	12.9982	11.7375	4.00912	10.719
CYR11.30646	5.86192	19.929	4.92357	10.0058	6.44276	5.47908	4.01318	7.95165	7.76433	4.33232	3.30052	7.54911
CYR11.32850	80.1562	89.0936	95.0226	74.7579	39.8266	107.365	43.9241	62.1263	66.3261	58.9272	30.4933	52.4423
CYR11.48242	22.3803	21.6012	29.2623	20.8469	23.5049	23.9059	11.4229	11.248	9.99643	17.5486	15.4476	16.6947
CYR11.48574	13.2875	13.4582	17.4124	11.8996	11.7532	14.757	5.75463	8.05904	7.6363	10.98	8.16672	11.0583
CYR11.57261	10.5055	8.81757	12.2979	7.62208	8.94093	9.82571	5.25934	5.6158	5.24921	7.35291	6.0247	7.48826
CYR11.59676	84.9386	64.72	102.977	53.1388	50.4658	98.3077	49.0395	35.1358	33.0596	45.5378	25.3714	49.2191
CYR11.60020	24.1967	28.4404	28.8831	19.0894	20.4982	24.0505	9.55438	13.2194	12.4127	18.5158	13.2602	17.8935
CYR11.74015	8.16313	8.64143	10.5426	6.63731	6.57395	9.43759	4.03091	4.34726	3.90754	7.30383	5.28979	7.26245
CYR11.79413	75.2174	136.748	73.9934	98.8421	54.2031	83.7431	147.334	80.1138	78.2986	49.28	49.0304	64.0146
CYR11.83432	130.394	84.222	106.564	98.2111	55.7949	95.2064	64.0148	36.9512	43.5505	48.3533	24.3361	51.0213
CYR11.83815	8.50556	23.9676	10.2172	9.95296	4.09947	7.56891	10.5604	3.84638	49.9545	4.22555	1.99208	17.5362
CYR11.85662	14.2759	14.3997	21.0146	17.8292	15.0467	13.7846	24.1143	11.4431	12.5996	14.3342	15.9393	14.4839
CYR11.85887	94.3261	166.133	108.971	149.915	72.8716	73.034	116.398	147.204	120.227	63.1066	49.9688	96.4724
CYR11.96079	12.611	6.43118	10.7651	8.8914	6.64981	12.2493	3.59989	1.87859	1.10731	2.16598	2.36208	3.56957
CYR11.109190	43.6594	19.2549	110.92	22.7648	72.7909	40.4947	7.21364	8.10455	4.9124	8.02912	5.99223	6.73212
CYR11.114865	43.032	43.9748	62.0712	32.1885	30.226	51.7949	20.3381	23.7775	20.1224	36.2492	23.4426	38.2461
CYR11.132501	20.0159	16.854	22.2049	16.0852	15.8989	19.7494	8.53768	10.0245	8.52306	15.6234	8.76838	15.6866
CYR11.143299	34.0267	24.7967	59.6761	32.281	35.6174	44.9511	13.1036	10.8649	13.0282	16.01	13.4161	16.9846
CYR11.154724	33.4441	38.3958	41.064	31.8705	28.9054	36.713	16.9051	26.5227	17.6619	30.9864	21.632	25.5837
CYR11.164528	45.8654	19.2418	72.4504	15.5812	44.1689	39.0612	29.2538	28.1033	25.5077	18.705	11.5322	22.7509
CYR11.166681	10.2025	13.1716	16.0179	10.6065	10.9432	11.166	4.42815	7.12308	5.6836	9.42621	7.47546	9.53073
CYR11.175913	8.32717	6.99081	8.26804	7.11212	6.00671	8.09526	3.89368	5.48613	5.87952	7.70683	5.3985	6.20012
CYR11.185356	53.1366	58.6455	74.4352	51.9478	55.2718	54.8769	22.6371	35.5249	27.0567	43.5213	33.047	38.9651
CYR11.197225	40.3692	25.1618	37.8083	33.4183	32.7785	33.9907	20.2239	24.2548	23.9036	21.9839	15.8096	23.9505
CYR11.204746	6.00424	5.99453	10.3264	8.15642	5.00138	9.10862	18.1552	6.01444	9.30141	6.78018	5.53547	7.48835
CYR11.206837	8.80381	7.64309	11.8802	7.56459	7.39216	9.09344	5.64235	6.69779	4.74376	6.80779	5.03067	6.85701
CYR11.208517	17.8966	12.2502	19.3189	12.3716	9.91914	16.0134	3.00366	3.23429	2.13872	2.35291	2.25719	3.84579
CYR11.217287	10.5417	10.4931	15.7748	12.0745	10.001	11.9279	4.63704	5.90436	4.56427	9.005	7.14351	8.43864
CYR11.226945	6.5451	24.3286	4.41214	10.5289	3.32387	3.44145	10.3036	19.4245	12.2583	4.89739	5.40202	8.37183
CYR11.230004	6.73394	6.13843	10.9529	7.51863	5.77257	12.8206	2.3634	1.79307	2.37918	3.86998	2.28723	2.03598
CYR11.230832	5.74955	21.933	4.52637	6.98522	6.76744	4.71519	1.67826	7.70026	6.23805	3.32664	3.04947	8.53901
CYR11.235392	22.0391	24.8307	34.2938	21.9768	24.4161	4.87064	3.14277	9.28475	6.58265	8.02651	6.24715	5.32195
CYR12.11877	132.563	136.737	180.722	117.767	109.444	137.956	66.3382	79.4443	69.6058	108.154	85.781	112.855
CYR12.40001	8.99429	11.7127	19.1561	11.9881	13.6929	12.229	4.27978	5.64523	4.67502	9.11377	7.20101	8.85924
CYR12.41888	24.1009	14.8881	22.893	18.9609	13.7245	17.4338	4.96053	4.99841	3.90413	3.83981	3.51988	5.99718
CYR12.43266	19.3822	13.0875	16.7038	15.8966	12.2997	15.0429	3.97945	1.52918	1.54778	2.29678	2.46148	2.59545
CYR12.44686	38.903	41.3144	50.1797	30.8798	31.8255	45.6013	16.7688	22.7454	20.0932	32.574	20.6599	32.3209
CYR12.51359	77.7757	82.8443	99.7237	69.1109	68.8717	89.4968	30.2911	45.8464	40.0163	62.7883	46.4922	65.2726
CYR12.56150	25.9579	32.3485	40.2016	23.819	25.4461	28.0014	11.9225	19.1609	14.9089	24.9759	16.2146	21.0581
CYR12.57225	11.9851	10.7241	13.2574	10.1143	10.7391	13.5861	4.4188	3.7591	2.01433	2.80228	3.38225	2.91781
CYR12.64947	498.133	540.634	671.198	469.705	483.076	500.35	273.17	334.723	270.914	419.231	321.875	407.108
CYR12.69564	39.428	31.4427	42.4973	39.8899	43.3523	49.2007	24.3858	18.5905	19.212	23.3616	18.103	20.037
CYR12.70219	16.3353	10.1251	26.1118	7.67485	19.791	28.081	3.64119	3.96551	1.96556	2.24667	1.62591	2.5486
CYR12.73460	24.3512	22.1008	28.164	20.9021	20.9125	23.7135	9.8269	16.5359	11.7739	16.9312	12.2905	16.9634
CYR12.85215	16.7752	15.9432	19.4221	11.928	9.93911	18.4836	6.86485	8.2619	7.55857	12.2311	8.70278	13.1135
CYR12.94408	9.33569	8.70242	13.2903	8.28584	9.24414	10.5103	5.38258	5.05597	5.05728	6.53301	5.43589	7.6605
CYR12.105744	28.7207	26.289	39.2353	23.1305	27.4951	31.2865	12.7769	13.1397	10.7739	18.4557	15.0735	17.2179
CYR12.117895	8.34418	9.26616	11.1598	9.85272	8.27826	8.79712	3.47147	4.28384	4.31692	6.76184	4.85856	6.0507
CYR12.127124	15.9453	11.3502	16.0785	12.1148	9.49413	13.0334	3.16947	2.97715	3.19063	3.01295	2.66327	4.13434
CYR12.127484	1029.71	1888.97	1287.98	1175.83	969.749	185.114	1411.05	2140.23	1712.96	1822.56	1524.76	1779.47
CYR12.129410	4.10916	16.7668	4.66758	10.0018	5.94175	4.60048	2.19656	6.50245	6.36566	3.48014	2.83698	7.64067
CYR12.139123	8.80485	7.03248	9.95445	7.66807	7.51935	8.54862	2.66235	1.33972	1.72294	1.63345	2.29485	2.06313
CYR12.154083	25.2141	17.7686	23.3624	20.2201	19.8065	22.4495	5.49454	4.02395	2.81249	4.03439	4.44746	4.30212
CYR12.161155	9.27657	8.35901	12.0009	7.06278	7.60556	9.834	2.90171	4.51434	5.75089	7.31472	5.86711	6.21997
CYR12.163721	84.9932	69.3556	104.238	55.2001	52.8806	98.8133	49.3233	33.8761	37.5255	44.8195	26.1451	50.5386
CYR12.194215	7.62397	5.52729	7.56443	5.59278	4.58851	11.6328	17.5171	8.61888	6.48874	4.75773	3.73828	8.06776
CYR12.212425	20.2331	17.2299	22.226	16.9215	13.3507	16.4224	86.2892	27.0407	24.9343	21.3925	17.334	20.5585
CYR12.214095	56.632	61.753	71.1461	41.0875	37.378	59.4226	25.4601	35.0974	28.0794	41.0833	27.799	48.7173
CYR13.303	32.3582	37.4373	44.3714	28.6352	25.6818	34.3756	17.5734	21.8943	20.8736	28.009	18.9545	29.2839
CYR13.2952	18.7589	20.4495	25.9172	16.8279	14.276	21.6045	8.77144	10.8483	11.7733	14.9047	9.98437	15.7068
CYR13.19300	11.5984	12.9587	23.6385	12.1617	28.5309	4.22284	0.571802	5.75471	4.76942	6.58933	5.45306	6.28925
CYR13.20806	22.3233	20.4779	32.0459	20.2132	21.7812	23.5514	10.1867	10.5673	10.3238	16.2675	15.0413	14.6682
CYR13.21556	8.39836	6.51339	7.61382	5.18861	4.83581	11.0588	18.2295	7.92277	6.02579	3.86122	4.0518	6.60194
CYR13.21689	39.7555	9.40182	0.787537	0.403052	18.8855	4.21176	1.48845	9.73699	1.33785	0.277935	0.245679	8.0741
CYR13.66226	97.3953	260.85	84.1068	849.58	47.3254	35.4812	123.335	71.9628	74.5679	15.0503	62.1367	175.408
CYR13.77016	62.4103	67.659	82.8274	58.4214	56.2363	65.1778	28.7135	42.7108	33.9821	53.2213	44.9442	43.9529
CYR13.77957	14.2729	22.0975	25.0228	20.7833	26.6058	10.3931	11.271	17.4642	12.8009	17.7723	14.2468	13.7551
CYR13.84685	145.607	99.2637	220.578	108.504	155.425	172.211	84.0585	62.7852	59.302	75.7822	48.6277	68.4766
CYR13.87435	7.65982	9.23717	10.8568	7.10918	8.25236	8.57895	3.46061	4.2067	4.23511	6.63933	4.98274	6.41173
CYR13.102168	899.653	1200.68	595.866	1063.53	423.205	480.879	162.666	473.488	319.942	374.476	228.746	258.653
CYR13.107924	51.6149	49.5498	66.8131	43.5905	40.5895	58.113	24.3944	31.0016	25.2796	35.9051	29.4222	37.3774
CYR13.108934	68.9169	142.607	4.67269	177.277	1.17286	0.779206	17.9456	10.8036	11.9889	10.3575	9.63412	10.7337
CYR13.116202	10.7341	9.67652	12.8195	9.56582	8.85249	10.751	5.65902	5.48439	5.92287	6.74274	6.08869	8.42488
CYR13.119805	30.7894	38.0257	36.4275	26.5869	26.693	30.0592	15.6964	22.149	17.3601	26.2866	17.9639	25.3231
CYR13.121781	38.382	21.2209	34.6511	26.889	22.6705	25.9103	5.34618	3.06015	2.52276	2.74528	3.17428	4.15127
CYR13.145487	15.0446	13.805	17.0716	12.4982	12.6905	15.8069	7.28683	8.86095	7.50608	9.49295	9.45619	12.2566
CYR13.170317	121.739	122.832	160.196	101.089	94.739	143.439	59.191	64.9864	55.109	86.4525	55.1231	83.5902
CYR13.179605	28.3661	15.779	39.1626	18.1231	24.7242	38.1552	15.061	9.67124	9.42248	10.868	5.85513	9.2315
CYR13.185685	13.2114	10.0617	14.9224	10.6358	11.0162	18.4972	4.11479	2.65726	3.62448	3.88975	1.91489	3.82512
CYR13.187299	10.8533	12.2214	17.5169	11.227	13.9325	11.9999	2.98615	5.01492	5.5567	9.86779	6.22661	8.80381
CYR13.214361	56.4878	56.4163	68.642	44.9482	46.3257	61.0713	28.287	25.3183	23.8077	34.8957	25.658	35.6221
CYR13.216490	38.096	67.6198	29.4169	44.0563	16.7357	11.3828	101.749	107.392	101.497	91.7498	71.2489	85.6556
CYR13.217627	10.4721	7.28567	11.5659	6.71706	7.16294	10.8137	3.52134	5.76919	4.61655	7.3399	4.7519	7.10754
CYR13.220691	7.11695	8.32367	10.5268	6.8218	7.29763	9.75363	3.80656	4.43372	3.37214	7.73341	5.16043	6.87402
CYR13.220779	61.0874	71.3467	79.1901	74.4136	71.7027	60.3088	59.9773	55.6602	47.1219	66.4894	54.0951	55.4897
CYR14.1469	11.9866	9.93053	14.5744	7.15053	9.20624	11.9391	4.93734	5.57573	4.356	7.41697	6.03933	8.11537
CYR14.3073	46.3242	19.9786	79.048	14.5647	40.1273	28.4514	31.3966	31.0831	23.7799	19.6537	13.2563	22.8128
CYR14.11765	86.6515	50.6384	117.976	61.5987	80.3906	105.881	26.5832	23.1273	22.3071	28.8492	19.7353	29.0542
CYR14.14584	16.1386	20.0239	29.1814	20.8253	26.4375	12.1572	13.3434	21.6655	14.0082	19.4344	14.2913	13.0754
CYR14.24325	77.8322	62.3218	141.331	80.8092	100.339	117.126	26.8146	23.6388	22.0142	40.7045	31.5943	34.9252
CYR14.27795	5.17307	45.2143	7.24165	11.6537	4.49607	3.48992	2.58783	8.02166	10.6809	4.96106	4.69537	10.3849
CYR14.29158	176.467	183.506	246.968	182.694	194.125	195.947	81.2176	107.787	90.5805	148.762	115.86	144.772
CYR14.41875	4558.96	4050.82	4757.75	3404.18	3515.35	4132.31	837.511	2411.5	1758.13	1769.92	1256.08	1764.57
CYR14.48988	24.0666	14.1669	34.9345	16.0571	26.4886	32.0039	8.55756	8.57419	5.16882	9.01947	5.41976	8.51875
CYR14.49767	13.5745	47.434	4.70541	22.4819	5.04984	5.81752	1.74078	9.38062	12.3591	6.22732	8.845	12.3767
CYR14.50010	43.7104	45.5808	59.5215	38.3837	40.8368	47.564	16.4829	19.8373	19.877	32.1889	29.5657	35.1317
CYR14.62648	4.55042	9.05021	2.77964	9.2145	2.52915	5.13969	2.97075	3.892	2.43969	8.81717	1.84667	2.46237
CYR14.64046	4.9258	19.8029	3.74832	6.76193	6.30629	3.13849	1.57536	5.51551	4.90181	2.7277	2.09595	7.96916
CYR14.68841	70.4231	130.852	48.2678	77.2457	21.148	20.8753	232.635	228.499	263.721	209.493	132.519	189.313
CYR14.69474	863.538	1189.49	608.369	1065.16	434.593	481.021	158.807	478.211	311.467	367.721	225.553	244.813
CYR14.107700	50.6431	56.1691	65.8094	36.6385	37.3617	58.9374	23.271	27.8348	25.0275	36.7636	27.9835	43.0057
CYR14.111626	20.1848	17.5236	25.6938	16.0698	19.1058	19.5974	9.14554	9.03571	8.30025	13.5557	11.6557	13.8639
CYR14.115604	2.53792	5.65518	1.98955	3.63653	0.459749	0.970226	16.1154	15.0474	15.8367	13.1115	8.17691	11.1455
CYR14.120474	31.5663	49.6784	6.26843	52.5981	1.6359	3.44194	5.60879	4.22864	4.75474	5.2366	4.32027	5.99201
CYR14.122116	8.89238	9.10673	9.12868	7.40048	5.70516	6.29533	4.85481	5.78798	6.57896	6.62464	4.17097	6.33868
CYR14.128592	30.9278	31.5525	41.7248	28.8689	25.1465	32.3154	13.6279	18.092	13.0787	27.3471	17.1219	23.0199
CYR14.128961	92.9331	41.5736	164.335	52.8471	76.9867	160.648	36.4454	22.7381	18.0273	28.633	14.3252	24.2498
CYR14.132220	83.27	66.3519	101.535	52.7686	50.4515	98.2042	45.1319	31.8464	34.7172	44.0022	24.8231	47.869
CYR14.141790	7.15348	27.0399	3.84536	13.6978	3.93619	5.69732	13.3026	21.7146	12.6565	5.81611	3.83203	6.41547
CYR14.144675	36.3369	9.45036	0.870764	0.445647	18.4164	3.89723	1.99841	9.99305	1.12421	0.570713	0.301824	7.56975
CYR14.145295	37505.2	35426.2	43269.3	35578.6	40544.8	42650.1	31420.4	31945.6	31118.6	25784	49647.1	34022.2
CYR14.147680	30.7936	39.089	32.7548	28.4348	14.7804	11.9312	19.4132	22.0343	17.1	11.4792	7.99589	14.8619
CYR14.156671	102.441	98.6955	95.2116	88.166	53.0027	79.4107	58.3314	55.6048	52.3335	43.9455	26.5104	60.3088
CYR14.160732	10.512	11.4988	13.4401	10.749	10.4734	10.1024	4.37049	5.13162	5.09962	7.93836	8.36509	6.95242
CYR14.166501	38.6198	63.4127	44.8961	49.5835	29.0084	32.6702	56.9375	57.483	46.3202	25.3781	18.6363	38.6862
CYR14.170509	43.5094	49.7548	50.036	49.6068	39.7798	38.9998	97.1676	44.6808	38.8061	48.4718	42.6323	41.7102
CYR14.173029	75.573	83.1792	127.566	74.6542	68.3058	95.5452	38.6963	48.7243	43.0277	72.1407	54.0725	67.8939
CYR14.173690	10.1971	11.7106	14.5669	11.986	12.9269	11.6641	4.09694	7.78222	6.23227	9.04417	6.91924	8.85769
CYR14.185246	11.7094	13.6956	29.9136	12.0696	36.6825	5.27653	0.654243	7.04919	5.38512	6.87001	6.83779	6.57262
CYR14.195114	357.301	324.185	483.858	263.167	278.121	337.38	175.262	136.626	135.614	204.677	153.765	193.531
CYR14.220813	7.05133	12.1239	13.8675	7.72898	8.29505	2.08202	11.4082	17.402	13.0549	14.2016	8.51197	12.4211
CYR15.7810	1426.72	1203.09	1590.29	584.576	468.935	1418.73	1367.76	1016.5	1182.79	753.093	365.039	1203.53
CYR15.12793	40.6625	27.7591	42.0273	38.5707	35.2282	36.009	23.4598	25.2798	26.4791	23.0598	22.4771	25.5191
CYR15.14441	64.4632	39.6891	79.2031	43.969	45.1129	86.997	26.3794	11.7136	11.2982	15.4042	10.9846	16.9868
CYR15.43105	10.1139	12.6652	13.0427	7.72507	8.38001	2.00158	9.73056	15.3424	12.157	11.5507	7.09359	11.858
CYR15.47071	14.9783	13.4952	19.6116	13.6285	16.5028	13.7692	5.57679	9.84185	7.14513	11.4232	10.5438	10.9413
CYR15.51015	15.4425	13.2742	23.8362	15.5235	15.149	14.0792	30.1246	13.7967	13.7422	15.0576	15.3806	16.1667
CYR15.52562	420.052	594.089	750.204	488.806	835.993	113.882	605.516	1015.54	843.121	972.01	789.593	682.445
CYR15.73526	6.44759	7.75135	11.7728	6.57292	6.52234	8.57342	4.92692	6.04621	5.5998	8.42834	6.20265	9.12192
CYR15.77074	8.15753	8.91621	11.173	7.38477	8.89042	8.86207	3.72654	3.81296	3.2825	6.31236	5.57	6.00851
CYR15.81830	134.241	83.2521	197.115	87.3286	121.728	150.295	71.2883	67.4838	55.2194	68.0079	44.1211	61.8862
CYR15.82733	114.056	120.639	205.137	98.1695	128.602	19.7775	129.942	152.812	118.14	119.064	71.2449	105.632
CYR15.86230	10.1107	10.6169	11.9392	12.6328	10.7932	10.6053	5.77128	5.71412	5.65279	11.7086	8.65055	10.1534
CYR15.86397	8.32929	4.45438	8.58172	5.7808	6.06564	12.3123	17.378	8.23275	5.40034	5.41768	3.91871	7.72118
CYR15.93925	18.2353	17.3027	25.9688	18.4675	19.6157	20.0112	8.44551	10.2387	8.41815	13.2687	11.9638	12.638
CYR15.105879	44.5705	76.3369	49.5334	46.5352	23.7136	19.2067	126.462	103.931	97.0915	85.5233	50.7551	85.0589
CYR15.106753	31.9622	31.078	46.2121	19.8727	26.2818	15.6839	41.7593	37.5487	34.2513	18.4638	10.833	23.8147
CYR15.113503	41.1742	47.4994	59.3972	48.4753	44.8594	52.3018	24.135	32.5193	24.5949	44.5497	32.711	36.8323
CYR15.120319	14.9465	17.9377	34.3192	17.0083	46.9995	6.97767	0.586244	8.86082	8.53048	9.19534	7.69027	8.20667
CYR15.122611	127.058	83.1962	100.807	96.9972	52.6389	88.1389	55.8023	35.6431	44.0207	46.4536	27.8215	48.219
CYR15.124872	29.2423	25.6318	33.9155	17.8719	21.6556	37.8886	8.06354	13.9732	10.7765	12.9282	8.42421	16.494
CYR15.131499	4.27159	3.94575	7.55832	6.07615	4.70087	6.80413	9.88084	5.09561	5.36348	5.2095	4.27801	6.64475
CYR15.135560	81.7719	65.9938	99.2502	52.8421	48.8106	98.1315	48.2475	32.1827	33.5965	42.6692	25.6496	46.2009
CYR15.136611	79.0145	77.8009	97.0356	58.2212	50.1604	80.1545	34.1129	41.4248	41.5609	59.1936	39.1895	63.9759
CYR15.139728	9.39215	9.49686	12.1976	8.42012	8.63212	10.8621	5.23538	6.26272	5.31539	6.91835	5.81343	8.04923
CYR15.144589	11.2209	7.0489	12.2133	10.987	8.00796	8.35436	44.2458	13.3613	16.3342	12.7066	11.342	11.8073
CYR15.160462	48.7494	43.8536	65.5492	27.0718	25.273	50.9336	29.0022	21.3498	23.979	25.9402	15.3598	32.5813
CYR15.174898	22.3162	19.112	22.0569	17.0072	15.1598	22.7198	4.86275	1.77632	2.53826	3.16123	2.31211	3.97089
CYR15.179827	128.79	120.986	149.896	86.9563	84.8558	113.905	45.0148	72.178	61.4788	87.5174	57.1264	95.3252
CYR15.196649	27.6924	29.0324	35.9094	25.1242	24.3125	25.6925	13.7721	15.8687	14.511	22.6304	16.9731	20.95
CYR15.205494	37.9569	36.3871	45.3731	30.8299	32.3218	38.0283	18.3155	22.3288	19.8326	29.3653	24.836	28.761
CYR15.222711	28.5947	40.4317	42.1022	33.9238	24.997	35.4222	26.0292	23.4791	22.3669	28.5111	17.9765	26.6275
CYR15.226821	15.8401	21.4934	29.5654	19.2579	25.1647	12.4421	14.1598	22.0486	14.35	17.9581	15.7624	12.9042
CYR15.232775	7.27098	6.39652	11.1672	5.41216	5.92717	12.6186	2.19855	1.54886	3.16176	3.98801	1.65315	2.41818
CYR15.245050	126.979	111.074	166.211	109.25	109.679	130.938	67.0627	54.611	50.3479	72.9214	56.9055	72.3905
CYR16.7435	312.143	376.11	440.092	321.176	328.577	356.407	178.775	222.627	174.097	313.389	266.993	303.204
CYR16.7744	67.3588	115.455	46.3329	72.3927	21.0788	19.6393	204.511	204.543	232.427	179.293	119.94	170.14
CYR16.9531	35.2993	18.9594	32.7243	24.6124	20.5467	25.2441	6.22808	2.80809	3.00944	4.21766	3.32612	4.59176
CYR16.13666	18.4162	17.1048	26.7507	17.2331	20.7089	19.4235	9.65975	9.5184	7.8652	13.0506	12.79	13.3567
CYR16.16535	6.42704	5.80728	13.3061	4.85794	13.1267	3.25984	0.239724	4.00817	2.65457	2.97228	2.58512	2.61755
CYR16.19357	4.97799	7.00567	9.97603	6.48441	5.81405	6.95556	2.77275	4.65091	4.08722	5.32544	4.01726	5.12913
CYR16.21998	37.9241	20.9123	53.4737	24.0703	30.1888	47.1268	18.9902	11.8196	12.6672	12.7182	7.32116	11.8375
CYR16.35532	7.04105	23.9207	2.09007	12.3985	5.76279	2.8647	8.3686	21.3236	13.1693	5.24477	4.9395	7.13671
CYR16.46781	16.0759	20.9347	8.24527	29.6163	5.64389	7.48846	15.5478	8.48928	5.93684	16.9903	3.97233	4.07424
CYR16.51087	44.4414	45.8439	56.1607	35.6505	36.2703	52.1242	22.0714	20.4408	20.345	31.1833	21.3023	29.7805
CYR16.58084	14.9137	24.856	22.7025	23.1028	18.8064	4.60891	2.73406	8.3703	6.01432	9.45418	8.11181	7.79642
CYR16.64190	20.3728	19.8312	39.271	36.7774	43.9685	31.6474	5.41743	17.8585	11.113	21.0716	17.6363	19.0308
CYR16.65559	14.3532	13.523	16.7754	13.5896	11.3864	14.2395	3.44071	2.00072	2.19916	2.40674	2.13143	2.56118
CYR16.71013	8.07458	21.0148	4.42307	13.0333	3.51769	4.92106	9.65336	19.257	13.3244	6.2439	4.34385	5.3636
CYR16.77333	191.168	219.464	353.974	172.13	216.285	29.6881	199.218	261.618	205.135	190.578	120.322	159.932
CYR16.77516	23.266	14.2899	34.308	17.3427	27.3354	28.8567	8.07399	8.02502	5.95416	9.60683	6.74944	7.2941
CYR16.81193	33.6312	28.1298	46.8625	19.7441	32.6727	20.737	4.39337	13.5359	11.2632	7.17546	8.42256	11.0703
CYR16.81624	16.5107	13.9452	21.6243	11.8544	10.4556	18.2225	7.86938	8.22645	10.158	11.4237	8.01684	12.2155
CYR16.82247	13.4794	52.641	10.4762	30.972	4.85361	8.44765	3.67491	18.6718	20.347	7.54831	5.96154	17.0701
CYR16.86706	103.602	138.721	62.9918	117.617	25.8621	41.3062	70.6792	73.2041	67.322	63.8912	42.9266	66.1264
CYR16.97308	2255.71	3324.61	1631.3	1519.87	581.779	1418.08	10986.9	5359.11	6536.68	4269.08	1552.05	6378.29
CYR16.102821	101.314	78.9599	113.361	48.4826	42.7435	115.684	46.9594	43.5421	44.534	54.1925	28.5127	64.4677
CYR16.103609	12.9196	19.1686	17.7925	22.7422	15.3391	11.9768	4.22328	9.60762	11.9573	16.8564	14.1982	15.6577
CYR16.104573	66.0392	38.1606	145.643	32.7186	119.209	69.7838	32.4733	39.6624	28.7081	28.446	18.1398	24.0814
CYR16.113166	52.9584	24.9871	63.2681	39.7196	39.7743	16.1378	81.4026	101.075	56.6958	25.4903	12.9282	26.3672
CYR16.114403	148.545	139.949	161.54	131.097	138.986	113.922	64.3894	122.975	110.546	109.375	81.1198	101.997
CYR16.136318	1259.89	1407.12	1739.39	1362.43	1522.99	1239.97	593.606	817.911	662.139	1069.55	1003.14	952.208
CYR16.144968	22.1951	33.3445	19.559	41.2915	15.6213	9.36594	43.3202	40.4591	29.2391	40.6766	35.8892	30.8412
CYR16.149394	13.6919	8.77709	12.7456	9.16595	7.41736	10.2698	2.94782	1.41524	1.64861	1.76141	1.9174	3.072
CYR16.152637	6.83271	9.90727	10.0683	8.75986	8.46886	8.70696	2.85438	4.59631	3.69442	5.6345	5.54893	5.04228
CYR16.156813	5.35346	6.67144	2.80794	8.84488	2.99223	5.7857	2.76621	4.90801	2.08851	7.2314	1.69668	2.20508
CYR16.176460	35.0746	27.0416	54.6695	20.611	29.3834	49.9908	14.4689	11.0122	9.56097	10.807	6.66791	12.6202
CYR16.176808	29.9731	20.8603	30.3633	26.6337	20.8682	28.9235	6.83959	3.57657	4.32991	3.52861	3.51221	5.97176
CYR16.179650	23.1696	32.5992	25.6655	26.7201	10.3932	1.92555	8.56695	20.5872	15.4516	15.7836	14.4808	15.1407
CYR16.179733	37.1076	27.1645	67.9237	37.3361	37.2034	51.3084	13.3483	9.08578	14.6059	17.8449	13.0633	17.6704
CYR16.194636	11.4285	19.657	5.04599	25.4206	4.78384	7.96615	10.0828	9.37567	7.76588	16.6035	5.05602	7.5073
CYR16.196897	13.1489	22.5803	14.6305	17.6363	6.97298	7.08066	36.0716	41.3822	32.2454	32.1871	24.8457	28.2775
CYR16.204734	4.1452	86.8723	1.32634	37.2572	1.16659	0.980989	246.628	227.627	195.889	286.32	191.78	269.534
CYR16.219302	9.07007	6.91502	7.75668	8.63555	5.37728	8.7736	3.83333	5.18154	6.87077	5.65649	4.27299	7.0022
CYR16.219921	48.1186	50.2984	62.0173	34.7421	41.5843	12.0633	31.1417	36.5851	34.5103	36.443	24.5757	27.0238
CYR16.227008	40.9479	50.2531	49.2477	50.3715	41.0215	37.2062	93.3132	49.1288	43.0125	49.928	41.7479	38.6316
CYR16.231775	10.6266	8.32728	13.858	10.3818	9.45098	11.4479	5.62837	6.77611	6.06497	9.82884	9.2813	9.76553
CYR16.235773	21.6814	22.0741	34.2929	19.7514	24.4839	5.51677	2.87351	7.12277	4.49976	6.61765	5.32848	4.24603
CYR16.235798	50.1088	49.5441	45.4137	44.4045	25.2878	33.1381	41.9701	29.9191	27.7852	27.8599	18.4161	24.5153
CYR16.235992	16.0808	21.0961	26.2986	21.9445	27.7434	11.6012	13.5066	20.2994	13.4997	17.5824	14.5652	12.425
CYR16.237117	19.7787	15.5299	26.9526	26.2656	29.0123	22.639	7.7403	5.77922	5.79404	8.00492	5.7073	5.20934
CYR16.239903	178.935	94.2693	249.357	88.7471	125.804	211.002	80.09	52.8045	57.1284	60.5608	37.9936	61.023
CYR17.17507	44.6059	49.5966	49.029	53.2623	42.0295	37.4207	102.656	46.8937	46.8619	51.2798	41.6043	39.2042
CYR17.19462	220.798	142.354	300.941	115.621	135.061	303.01	94.5121	65.7412	74.0066	71.3573	33.3098	80.8884
CYR17.34773	13.8018	12.6034	17.5011	12.6134	15.0311	13.3071	6.21025	8.63347	6.16836	9.95735	9.52458	10.3164
CYR17.45035	43.3408	30.437	40.879	34.5741	20.0553	12.0495	42.9944	39.0293	29.9848	33.8705	26.9935	31.0665
CYR17.59729	7.67955	8.08295	9.48694	6.31149	5.43199	7.11257	1.79543	4.46919	2.62076	4.96181	4.79426	5.52942
CYR17.62914	33.9067	6.94502	0.793289	0.29527	22.841	4.54341	2.14188	10.0093	0.916379	0.519935	0.412455	7.1586
CYR17.64113	19.7239	17.6072	23.2743	15.8511	15.2535	18.0697	6.94955	13.3525	10.6847	15.1474	11.2251	14.1948
CYR17.68260	1434.66	1448.77	1327.74	744.637	630.868	486.658	1933.72	2040.29	2333.94	982.271	565.62	1340.39
CYR17.68355	20.5741	19.8826	22.3363	17.8012	15.3868	14.7925	85.1827	27.8776	22.4792	20.8883	15.7897	18.9753
CYR17.70300	19.7637	16.8198	25.4056	16.1128	18.9671	19.755	8.375	10.028	8.29196	12.3389	12.1222	12.7868
CYR17.73957	19.2085	16.4411	26.7632	24.1755	29.8956	23.041	5.82859	4.61046	4.83812	8.47776	7.35133	5.01008
CYR17.74119	110.934	115.892	149.197	105.253	104.662	115.326	49.7884	63.3091	59.5444	95.6565	80.1557	93.244
CYR17.75673	15.4941	21.6724	29.1782	24.5577	27.3426	12.9054	12.9557	20.1905	12.4494	16.0547	14.8178	12.5031
CYR17.76090	6.48719	23.7439	5.62139	11.567	7.12136	6.49859	4.39111	9.64175	9.4603	4.32429	3.70548	9.28902
CYR17.87098	8.15986	4.67196	7.55224	4.58547	5.13085	10.1833	17.205	8.33191	5.69631	5.19736	3.73031	7.54657
CYR17.89839	8.77504	5.97261	10.0237	6.8583	5.06689	7.60381	2.189	1.96272	1.10181	1.11477	1.68612	2.01967
CYR17.93099	18.0503	14.6258	19.5052	10.6425	11.8747	17.1099	8.47413	8.90434	7.30172	13.5171	8.62936	13.2199
CYR17.102906	18.7165	20.3208	25.8487	19.4851	15.6293	23.992	4.78139	1.81227	3.03999	3.69659	3.96294	4.40352
CYR17.105583	7.82069	10.4416	9.75365	8.61295	7.84837	8.98445	2.14979	5.67941	3.31385	6.82424	4.93323	5.36055
CYR17.124388	10.6686	9.56028	8.91016	8.33823	7.06311	8.92893	2.25539	1.54075	1.13522	1.83772	1.68461	2.00916
CYR17.127514	7.58312	9.75358	12.1201	12.544	11.6031	8.06831	3.67314	9.64506	5.12632	7.54468	6.68743	8.41408
CYR17.128874	9.19302	7.55847	10.8252	6.92083	6.61234	10.1212	3.06587	4.60774	3.1635	5.6676	4.80179	7.08152
CYR17.141844	18.8687	14.3977	19.0464	11.1761	12.6454	14.9874	4.70119	3.24436	2.99408	4.37131	3.59653	3.08907
CYR17.161572	27.0725	13.998	36.7674	18.821	26.7734	30.9248	7.88636	8.92127	7.2561	9.24733	6.13992	8.72509
CYR17.177103	7.96292	24.4731	11.9281	8.28488	4.927	7.40033	9.94931	4.10559	46.0261	4.63917	2.03773	14.6121
CYR17.180112	32.6826	34.1725	45.3688	31.5897	33.7672	39.0941	14.8658	18.9603	18.9014	24.917	20.2602	26.2347
CYR17.181542	53.8068	41.3264	71.8387	30.2732	30.0631	52.6531	29.5121	22.4944	23.7073	28.4257	16.2773	33.4539
CYR17.187860	15.3852	9.20591	14.8442	10.9763	8.62915	11.8135	2.77335	1.76472	2.25151	1.53688	1.65385	1.94117
CYR17.192611	33.272	18.8482	31.6354	25.4354	20.2778	24.1682	5.77877	2.32634	2.16073	4.13126	3.09464	3.92921
CYR17.194219	4.14959	19.4679	3.53181	6.55124	5.69416	3.80724	1.88209	5.30365	4.6419	1.96805	2.41618	5.9939
CYR17.199472	45.7667	47.1031	59.3979	38.0703	37.716	49.7712	21.1048	23.5432	21.641	29.7672	23.2041	31.7426
CYR17.208517	7858.36	5703.86	4487.09	3791.18	1215.8	3993.88	3489.17	3266.43	3856.23	3256.03	1320.79	4494.88
CYR17.210108	23.0592	16.8007	23.2908	18.2679	15.067	18.6555	6.83949	2.74379	2.94054	3.9378	4.09751	3.93947
CYR17.218571	15.457	14.4514	15.6314	13.1312	16.5054	17.556	16.3544	13.4349	13.7492	11.471	26.3684	14.278
CYR17.236286	87.337	72.4127	96.5189	49.0278	45.9486	102.373	42.334	38.9261	37.7739	51.1769	29.5382	57.8192
CYR17.238180	65.6585	68.4518	85.0275	53.8797	60.1972	75.402	30.3944	40.5473	35.9682	51.0794	38.8121	52.3932
CYR17.238235	129.978	121.918	174.38	109.908	113.661	143.159	72.2605	64.329	56.5011	85.8087	64.4003	80.8524
CYR17.239258	10.7155	9.59028	12.9821	9.3266	8.47039	11.2652	5.90946	5.39525	5.00376	7.21891	5.21833	6.99683
CYR17.242690	40.5536	36.8104	50.6834	38.1959	38.0696	38.3379	19.3821	28.2865	24.5531	34.2486	31.1279	33.1872
CYR17.249423	13.8998	14.1066	13.3092	12.9277	12.6528	14.0372	3.86144	2.8869	1.74528	3.7082	2.75177	3.9714
CYR17.249612	44.8302	34.7833	52.4215	41.8195	43.8455	56.012	27.9624	21.8071	20.6775	26.1069	19.1897	26.8812
CYR18.3938	3926.24	3063.46	2111.44	2267.14	698.107	1713.92	2295.93	2041.33	2442.59	2134.67	881.412	2772.11
CYR18.6772	5.87649	20.2519	4.74837	12.7903	4.39627	6.06659	1.93996	7.8436	6.62293	3.59096	2.77201	7.14347
CYR18.9274	11.5009	8.54608	12.7578	7.49774	6.739	9.93252	2.59582	1.85776	1.67988	1.98501	1.45993	2.16298
CYR18.17403	15.3645	13.3638	18.2283	15.4984	15.5582	14.409	6.36984	9.66538	7.23447	13.8258	12.4968	13.6803
CYR18.26809	28.8999	18.9299	29.0703	23.0832	18.7702	25.5806	6.93328	4.11645	4.54331	4.73887	3.22444	5.31067
CYR18.27086	1143.45	927.048	1221.83	454.316	318.211	1361.61	705.299	589.36	697.964	512.903	242.701	894.485
CYR18.28027	41.6927	25.8587	41.5418	20.989	13.4533	40.3548	8.06461	3.91824	4.54914	4.5696	3.28445	5.88802
CYR18.34283	41.8322	78.2831	32.241	53.824	19.8793	15.1701	128.103	137.05	122.082	108.977	84.7268	105.662
CYR18.43097	7.71614	5.34566	9.67825	5.84978	6.02798	12.7825	2.79978	2.95864	1.84963	3.46354	3.95373	4.89918
CYR18.43454	4.44825	7.58988	5.84378	4.94749	4.47455	4.0333	9.79673	5.83115	4.19874	5.86833	3.98474	3.86984
CYR18.52916	13.7276	11.7411	17.1386	10.1727	9.08361	15.0311	5.93801	7.20228	4.81695	9.90379	6.74976	9.48266
CYR18.53773	10.9982	10.2587	11.6724	10.9947	7.90565	8.39273	44.518	15.5961	13.138	13.0513	9.97818	13.4484
CYR18.56084	47.2564	52.9171	64.5062	38.4665	34.7199	57.7207	20.9276	29.8827	24.6944	37.0452	25.8233	39.9735
CYR18.57961	73.9542	96.2729	103.804	98.2189	89.4566	72.8882	68.4844	73.0088	59.1177	85.9841	66.4767	65.404
CYR18.64224	5.55893	7.18954	7.98132	5.51441	10.5542	34.9193	1.4546	3.0363	0.650805	1.75041	0.248984	1.47063
CYR18.73168	24.9912	47.8265	22.5936	26.2088	13.5816	32.1938	25.04	19.9393	27.0744	31.8639	15.5041	21.926
CYR18.77271	8.86313	9.28824	12.9256	9.32857	9.33907	10.8928	4.37729	5.66406	5.53063	6.8058	5.94058	8.3161
CYR18.86809	37.471	42.89	60.2973	41.8915	47.2025	47.7881	14.7815	22.3445	17.9255	33.481	24.2895	30.509
CYR18.94710	6.42601	7.64052	11.0294	6.76928	6.54796	8.63373	5.30643	6.32356	4.78376	6.98039	5.36848	9.70118
CYR18.99743	16.2847	23.607	26.596	23.7317	27.9444	10.7001	12.3102	21.0486	14.2318	18.2456	16.3961	13.665
CYR18.104190	8.14442	9.2866	8.55674	6.36543	5.01932	8.18509	4.09384	5.09744	5.94217	5.83105	4.15558	6.86371
CYR18.112871	213.689	198.684	328.48	304.843	377.196	281.811	119.665	68.2952	69.0385	119.09	102.557	99.5854
CYR18.113866	18.4162	18.2214	25.1607	17.4289	19.0068	21.3126	8.66536	8.67331	9.10457	12.2726	12.5225	12.6938
CYR18.119102	9.17494	10.8202	14.1408	10.6498	9.2565	10.9971	3.70816	5.32149	4.45877	10.0785	7.45804	8.5074
CYR18.134872	11.4195	8.68649	10.9617	8.86441	9.34064	10.8397	3.43533	1.73755	2.03949	2.5001	2.7592	2.89775
CYR18.140494	15.1589	14.8294	16.0965	11.4504	11.2396	13.7221	6.44573	7.48213	8.12416	10.3725	8.15379	10.197
CYR18.147001	10.5173	7.97053	9.5612	9.04198	9.0358	10.7218	3.43736	1.38377	1.76547	2.14824	2.34149	2.60234
CYR18.147870	6.69647	5.75159	7.89934	5.23376	7.21781	8.41957	2.93601	4.27944	3.36328	5.06645	4.62699	4.25177
CYR18.161471	14.7598	21.8262	17.2641	19.034	8.91251	17.1366	12.1801	15.3712	16.4734	21.1118	7.54376	12.6904
CYR18.163094	9.25448	5.14198	16.2864	5.44198	10.897	17.128	0.799516	3.37951	1.20728	0.895753	1.33432	0.979318
CYR18.166071	2.75482	13.4887	3.70214	7.382	4.06361	3.61078	1.87421	4.19164	5.57034	2.39978	2.01652	4.99745
CYR18.166603	49.2112	49.883	58.8147	35.4215	35.5883	49.6971	21.0263	32.5952	27.5315	32.5628	21.4435	37.3587
CYR18.170069	19.9823	11.36	21.0247	14.9249	11.6039	19.0977	4.29405	2.40293	2.48327	2.25192	1.59514	3.77294
CYR18.171179	16.3736	8.66968	14.4334	11.2767	8.47985	11.5687	2.75733	1.29501	1.29535	1.71624	1.98229	2.50895
CYR18.173433	136.055	149.885	249.062	111.074	142.844	21.714	149.393	171.575	148.085	128.842	82.5453	114.952
CYR18.178900	68.3557	43.4353	70.9645	60.9979	44.0891	57.9789	16.0456	6.28426	8.97983	7.27205	5.75375	7.46189
CYR18.179117	12.2326	12.692	13.1647	11.7526	13.0525	16.0823	13.1939	15.5711	12.4647	10.1074	25.3637	14.0181
CYR18.186558	13.6621	11.7027	13.1144	11.5931	11.358	14.3008	4.27858	3.94967	1.78227	2.36924	2.91683	2.83983
CYR18.189371	110.578	106.201	113.781	59.2602	49.7562	72.7202	80.8343	81.6099	68.1837	63.3874	38.0933	83.4573
CYR18.196249	31.2477	9.00834	0.597625	0.278052	19.4952	4.98684	1.61359	9.47301	1.28596	0.70304	0.379773	7.71764
CYR18.196437	30.9186	36.4288	38.6536	29.4912	29.2765	32.4847	16.5992	22.4471	18.3666	26.7736	19.1787	26.0412
CYR18.200524	6.73496	5.3552	5.70972	6.73968	3.12139	4.97297	20.7691	7.10634	6.89743	5.86392	4.50796	6.44427
CYR18.202523	10.3698	9.03664	14.5712	8.18121	9.86885	11.6561	5.49093	6.35602	5.02509	6.46257	6.12349	7.84189
CYR18.217515	4.02728	3.87509	4.69807	5.70503	2.96379	5.07853	8.56225	3.03836	3.73508	3.76609	2.29611	3.99535
CYR18.218806	89.7627	72.8802	102.696	47.2913	43.6964	99.1415	45.74	40.6422	39.8231	50.4763	28.5665	58.3579
CYR18.219943	73.8248	71.4188	87.8156	56.3347	60.9261	75.2284	37.4997	38.8902	36.5545	58.7218	38.3678	57.9582
CYR18.220383	5.03241	5.17549	13.4392	5.93758	14.0031	1.97318	0.109735	3.35	2.81694	3.15557	2.56394	3.11072
CYR1.9524	19.1418	18.4903	28.2236	17.3452	20.3284	20.6111	8.9568	8.76945	8.2056	14.6188	12.0218	13.3345
CYR1.20113	33.4155	50.7925	38.5362	47.6318	41.2876	12.5737	74.9334	100.502	67.3887	78.3702	68.1713	47.184
CYR1.24550	2.83968	6.49678	1.96422	3.19856	0.737579	0.532151	18.9407	17.2577	14.9677	13.7934	8.12142	12.8596
CYR1.28508	33.2711	28.4843	47.1561	30.3877	31.5797	32.8018	17.2512	23.9793	22.3658	26.0956	24.9206	30.9796
CYR1.32957	10.1114	19.9901	3.72681	15.9056	1.47812	1.18249	10.0866	12.3374	9.35041	10.4064	8.30969	8.99005
CYR1.41262	61.7345	61.8832	83.4803	51.2965	47.774	73.1435	24.3559	37.9606	26.9704	47.9049	32.2866	43.5029
CYR1.67405	4.36108	5.82021	6.70348	6.34914	5.69277	4.90354	9.69612	5.10036	4.97804	4.85224	3.93346	6.04014
CYR1.70637	55.4335	34.7549	81.9946	46.2421	58.2006	71.0938	18.6079	16.7188	17.9803	19.7553	16.3943	20.9957
CYR1.78854	41.0299	36.1117	30.3028	27.7828	11.8337	45.0729	109.09	37.6731	46.0269	26.8108	31.2532	21.2646
CYR1.82024	4.21965	89.4264	1.33115	37.3923	0.807462	0.492272	250.015	231.933	194.564	286.754	190.191	275.841
CYR1.86626	9.89578	28.2279	11.7608	8.52344	4.48159	7.54899	15.4954	3.36992	56.0945	4.33302	1.68549	16.7228
CYR1.94526	3.52351	7.12424	1.25386	7.69539	0.626359	1.15398	19.043	8.06694	6.54042	16.2315	5.27289	6.92581
CYR1.105062	0.489531	7.56483	0.234954	3.00616	0.190027	0.089116	84.9271	36.9448	39.3545	45.1909	26.6308	51.8397
CYR1.108574	22.6387	34.0893	16.6136	22.3436	9.23785	12.0121	43.1046	51.599	44.4508	39.0664	26.1837	39.8594
CYR1.115363	195.57	281.354	324.249	199.455	309.377	44.9304	276.125	470.009	388.735	418.804	325.26	317.54
CYR1.115972	2.55629	8.49239	0.190853	6.79293	0.173654	0.434333	58.7445	14.2488	19.2584	15.8044	10.0719	12.9168
CYR1.116343	25.2434	22.2292	23.2858	21.9035	16.6759	21.0907	76.8813	25.2572	24.5281	23.5584	21.2176	22.6286
CYR1.116495	78.9896	77.7699	105.263	66.2194	65.2902	88.1169	40.3298	39.2927	32.1368	49.1085	35.7668	48.9618
CYR1.127095	36.0931	36.0653	52.3451	34.7567	39.7299	38.5608	14.0267	24.3498	17.427	34.6129	24.1159	30.3233
CYR1.129155	15.3252	14.8892	18.7734	18.3735	9.56839	19.3077	32.1675	13.4174	12.9642	13.8613	9.67421	18.0279
CYR1.135027	38.2276	37.2622	48.8664	31.8215	27.4013	42.0646	19.7419	22.6329	20.9229	29.262	20.0864	29.5243
CYR1.137692	15.5841	16.0079	18.7654	10.0782	12.7414	16.388	7.58437	7.49139	5.66723	9.1105	6.78553	9.19423
CYR1.138348	8.58778	15.4298	7.94484	13.2488	6.69624	8.84992	23.9632	20.0435	16.1105	7.52618	6.00049	12.3869
CYR1.139637	7.62541	5.87285	6.17225	4.72063	7.79577	7.84103	8.38962	6.43311	5.08462	4.73171	12.9685	7.84958
CYR1.144050	47.7028	34.6302	43.5963	37.8966	21.3945	11.6515	49.6393	40.4792	36.0022	38.3278	31.3252	33.425
CYR1.153062	3.38051	8.55064	1.43248	7.06942	1.05512	0.931417	36.2596	10.3152	10.2205	20.2734	7.71388	7.25127
CYR1.157198	238.055	136.129	400.164	149.091	365.663	303.005	57.5146	109.875	106.095	113.724	82.1774	111.195
CYR1.159945	6.07803	5.10261	5.26297	6.17062	3.10733	5.07035	18.8283	7.54151	6.79484	6.3682	4.34172	7.06175
CYR1.162171	55.1579	59.3379	53.2261	43.6151	20.8654	67.0743	43.6265	42.4256	39.7843	36.4187	21.7249	32.7939
CYR1.166672	16.4152	16.8177	19.9233	14.3746	17.3398	15.2778	5.74962	10.9846	9.12349	12.7378	9.7082	12.687
CYR1.168496	16.7621	261.24	6.20802	114.451	2.60014	2.64898	418.219	425.526	370.541	548.231	375.033	539.258
CYR1.189622	6.11015	21.0415	3.32634	17.5102	2.19067	1.89248	71.9773	22.6873	23.5392	46.5735	16.2076	15.8952
CYR1.192175	15.5984	14.2653	21.4517	16.4005	14.393	13.1758	29.4399	13.5832	14.0353	14.8888	14.2006	16.7349
CYR1.194063	79.5158	75.0898	87.9307	61.3662	64.424	76.3934	31.7222	40.1733	39.1573	56.0611	43.4393	56.434
CYR1.204271	12.8892	11.5432	13.2528	11.3698	11.5209	14.2636	6.9229	5.13804	6.71101	8.42649	6.67108	9.2126
CYR2.6549	4.73217	22.1382	4.99958	12.7006	3.63923	4.32356	1.51863	9.60496	8.45917	3.85655	3.58722	8.07835
CYR2.7984	4.10914	6.24291	5.46465	6.15552	5.11759	4.25449	9.02748	6.47376	3.811	3.98764	4.18709	5.02775
CYR2.11876	250.31	279.949	356.33	261.732	276.432	271.433	112.191	153.979	133.704	225.076	188.983	231.889
CYR2.12308	20.2321	18.2397	27.6202	17.8384	20.8717	19.1233	8.62664	10.7746	8.87511	12.4619	12.0239	11.9103
CYR2.23342	1.23334	15.9646	0.276243	7.22955	0.251349	0.235747	110.969	57.7338	55.7497	68.5221	41.221	70.8686
CYR2.33520	11.02	11.5394	17.7525	10.733	13.2446	13.2327	4.90211	7.223	5.70894	8.54338	6.21918	9.08249
CYR2.40826	32.612	28.9885	40.1562	26.4608	28.9508	32.7706	17.6002	16.129	15.6805	23.3143	20.3116	23.8654
CYR2.49119	95.4112	102.264	173.001	76.8964	113.64	17.1802	104.403	133.607	102.836	101.275	60.911	89.7521
CYR2.49125	89.6966	66.8575	108.011	53.5445	52.3512	102.377	46.5336	34.4554	32.73	44.7759	26.2306	49.6515
CYR2.70503	27.3316	24.2614	26.4243	22.0816	15.2638	21.8496	118.858	29.547	26.6412	29.0431	19.1926	25.4698
CYR2.70670	12.407	18.5069	8.95683	11.3398	4.24898	2.80927	22.3232	30.0333	26.2762	18.6274	13.1648	21.9724
CYR2.73851	16.2993	17.397	20.6626	14.8083	15.6812	16.6584	4.6908	11.0154	7.64984	13.0335	9.87598	13.8554
CYR2.86507	40.3466	29.1164	42.6424	39.0229	34.8312	34.3294	22.2073	27.5743	25.7137	22.7091	19.724	26.551
CYR2.87548	2.33856	7.20736	1.68361	3.52495	0.226947	0.266075	19.0354	17.7914	15.6351	13.6519	8.85088	12.1304
CYR2.88198	109.424	115.21	154.632	100.894	104.577	112.678	50.3059	63.6609	60.02	94.8921	81.1755	93.7736
CYR2.93623	25.2917	26.6481	37.0605	24.2598	24.3771	28.5669	13.1287	18.7167	16.1221	24.2715	17.8345	21.246
CYR2.95863	4.22274	22.1676	5.33274	13.061	5.432	4.29339	2.44502	9.56941	9.12748	3.19587	3.81894	7.27326
CYR2.112790	42.9162	47.9395	54.1127	48.8047	40.7943	38.4588	103.102	48.9161	44.6703	46.8062	40.045	41.5957
CYR2.130683	31.3523	8.9965	0.739186	0.847506	21.2982	4.71618	2.24528	10.2439	1.3454	0.758656	0.356874	8.26937
CYR2.134569	6.68575	5.03812	7.71198	5.90467	5.08676	10.5218	17.0572	10.6102	5.41843	5.03946	3.85398	7.69398
CYR2.136632	8.25152	15.0777	2.45166	12.635	1.71594	2.2532	30.7424	27.9803	16.0185	9.17526	5.98125	13.0087
CYR2.155794	19.1564	18.6852	26.4109	14.1543	19.1919	3.53859	1.82533	6.60111	4.68568	5.31712	3.51498	3.64121
CYR2.168654	18.2073	57.7105	14.0933	28.8791	4.97168	8.81437	67.0971	53.2345	50.9391	42.1032	26.0882	47.4596
CYR2.186436	9.76461	9.17801	12.8308	9.15806	8.72645	9.84387	5.3146	6.19393	5.20147	6.83643	5.98887	8.43862
CYR2.191394	38.9388	40.2726	52.6581	35.3142	32.1914	37.449	16.9946	21.4411	16.6049	29.867	22.844	29.9711
CYR2.192125	13.3097	14.1322	16.2908	12.0266	13.2094	14.9745	7.12515	7.90489	8.07638	10.099	7.6634	11.0738
CYR2.197814	157.142	149.774	174.724	141.851	141.403	121.267	65.2405	125.918	118.127	113.558	86.8817	107.71
CYR2.206589	0	3.19625	0	0	0	0	0	300.089	0	0	0	0
CYR2.213437	18.5112	47.0792	29.3152	24.2192	12.4088	23.485	16.1816	28.6623	18.6167	5.87046	8.49935	21.9402
CYR2.215818	233.304	133.621	406.914	150.275	363.971	302.511	65.0731	114.264	112.421	109.965	81.6741	117.059
CYR2.217477	4.20008	88.5802	1.39122	37.8199	0.723345	0.678446	249.661	229.786	187.179	289.682	192.891	270.054
CYR2.233173	38.0448	37.3335	53.3452	37.7776	37.231	37.9997	17.0611	22.7518	17.442	30.3723	23.2872	29.1427
CYR2.241782	8.96575	8.64036	12.0013	10.7806	8.14483	10.6139	20.0317	9.15386	9.38635	10.1094	8.06241	11.8736
CYR3.16110	14.0079	12.3007	20.1159	11.2101	12.794	15.8432	7.37178	7.99528	7.72703	9.87688	7.80514	10.0536
CYR3.21864	17.5922	19.2488	27.1422	16.4929	19.4731	20.7937	9.95019	10.7262	9.73045	12.7051	12.7008	12.6024
CYR3.23250	98.3388	74.0472	82.5605	94.0574	50.7457	72.85	45.3133	32.6183	38.2368	37.8822	23.535	39.2828
CYR3.34014	67.0274	69.269	98.1089	66.7065	55.6028	72.8595	41.3419	55.6514	49.868	71.1149	51.7336	71.7207
CYR3.39137	22.1401	21.7033	31.499	19.7242	21.8065	25.6155	9.07044	9.06975	9.60228	14.1179	12.1403	14.4587
CYR3.49827	19.236	22.7591	29.5492	21.0879	27.8693	10.087	15.2489	19.5816	15.2535	18.3098	17.6929	13.3078
CYR3.52058	30.0701	58.3501	24.3589	32.9839	12.1857	9.82807	78.412	90.0832	80.6171	75.3737	51.6184	72.0774
CYR3.53052	7.72144	8.04411	10.5002	7.20486	5.03122	7.3294	4.73502	5.03515	7.01506	7.14003	3.67017	8.37934
CYR3.67547	36.5374	40.4329	49.5842	33.7316	36.6888	38.732	13.84	25.2358	16.3911	29.4579	22.9004	28.9981
CYR3.68687	7.86791	7.49812	10.0128	8.10591	7.04544	7.91835	13.6863	4.3805	6.63368	6.66352	7.23628	7.30881
CYR3.86375	11.6075	30.272	13.5872	11.3515	5.74551	8.88236	11.3099	4.10034	75.5031	5.92806	2.00384	14.675
CYR3.109561	59.317	68.7439	78.6132	74.8405	68.6941	59.0174	61.3447	54.0508	46.1031	64.0584	50.4626	54.2927
CYR3.116449	1.36899	16.7903	0.348439	6.80885	0.507263	0.039648	112.048	58.7883	59.5944	75.205	40.2185	73.537
CYR3.133339	51.4346	55.4953	69.2655	48.6871	49.7952	56.6113	26.3063	28.7583	28.3413	43.5611	32.3056	42.1534
CYR3.134940	17.7873	263.352	5.01688	113.585	3.08794	2.81232	419.067	434.126	372.761	544.498	378.76	544.761
CYR3.137028	7.93968	11.8387	15.675	11.7711	12.4553	10.274	2.87718	5.49239	5.13877	9.63586	7.29201	7.34079
CYR3.142570	37.8239	19.4834	31.4666	26.0427	14.0096	10.3858	22.3633	14.0042	14.0832	17.3899	12.8472	15.0096
CYR3.151832	27.8198	28.751	38.8976	28.5134	29.0834	31.1522	12.7502	20.0496	13.5008	24.1256	16.7806	22.6083
CYR3.162958	11.7897	9.5276	11.8689	11.3711	8.47761	9.19005	45.7938	16.2977	14.8893	14.234	10.3337	11.9451
CYR3.167900	62.3906	64.4189	86.479	60.6274	61.0412	74.1931	34.1285	35.8897	38.363	51.5766	37.0945	53.4864
CYR3.168004	16.3293	18.1756	22.0408	14.8448	14.8293	16.3182	6.13943	10.2523	8.04437	12.0827	10.4088	11.8685
CYR3.191502	234.062	145.725	313.653	150.193	217.373	251.322	123.13	97.9548	97.7819	114.871	76.2748	102.146
CYR3.203724	31.8869	31.7855	38.1935	29.3444	29.0896	33.7152	14.9135	20.6056	18.1553	26.682	20.9266	24.9431
CYR4.1545	7.77869	7.48188	12.0329	10.4971	7.86929	8.27223	13.9601	6.55652	5.62133	8.00981	5.50684	6.97307
CYR4.16568	9.45993	7.48939	10.2054	8.13973	5.01134	7.35455	4.2316	7.11772	6.93464	6.32127	5.00289	6.6125
CYR4.37635	15.6607	16.8264	17.6086	12.7296	13.277	17.7214	6.88999	8.47354	7.50804	11.2474	9.55647	10.9875
CYR4.38908	64.7494	61.8408	85.0271	57.4197	45.8698	68.4726	28.2174	38.9138	30.0342	46.5819	31.4257	43.4006
CYR4.39819	94.6869	275.279	89.7417	864.875	50.8301	33.2121	126.41	74.5779	79.2987	15.5812	62.5679	168.749
CYR4.41224	39.7321	33.7329	42.9418	38.2459	41.925	45.9307	27.3295	18.281	20.4255	26.0417	18.2867	22.4909
CYR4.62546	228.742	211.3	362.292	93.176	46.9215	134.638	85.5473	90.2625	252.639	191.524	56.9947	312.861
CYR4.68817	2.86429	6.68254	1.43794	6.6902	0.738051	1.06982	16.7991	7.88987	6.83966	15.3079	5.34844	7.70821
CYR4.92683	19.4602	16.3942	26.6572	18.3101	22.0423	20.4346	9.09153	8.4954	8.10354	12.2018	13.4222	12.7601
CYR4.96414	4.77175	4.80545	5.80192	5.16795	4.26031	4.90796	8.73438	4.42892	4.66869	4.44544	3.57228	3.94944
CYR4.101942	6.74131	9.96334	3.38221	9.9475	2.85761	6.01334	3.79141	4.65274	3.63204	7.07963	1.5701	2.39693
CYR4.104021	8.28292	24.0065	3.36383	23.1203	2.1023	6.37937	70.2851	20.4557	23.0653	48.1799	14.7337	27.3788
CYR4.108013	14001.7	13624.8	12148.6	21003.7	26983.9	19268.5	14694.2	18963.5	19181.1	23733.7	20077	14833.6
CYR4.120641	16.4822	16.2265	19.8427	15.9736	14.6676	15.9625	5.32639	9.47974	8.37218	12.4934	10.2209	13.8006
CYR4.123747	2.84072	7.92083	1.49709	2.67732	0.567575	0.372641	18.7581	16.1071	14.8778	12.8785	8.85411	10.676
CYR4.124230	1.3738	16.6179	0.29305	9.51008	0.222202	0.291773	112.974	52.3975	50.1061	62.9953	37.1392	71.0269
CYR4.137137	24580.5	23946.2	28414.8	24991	31663.1	28657.3	25467.1	23314.2	20853.4	19952.6	41151.5	25775.3
CYR4.143806	85.8579	69.9407	105.107	55.1686	52.715	96.7978	43.9209	34.0657	37.5558	42.5189	27.057	50.3521
CYR4.150809	46.826	48.596	49.771	49.2778	42.0997	36.841	101.92	52.3311	42.1285	47.4725	39.8459	42.2899
CYR4.161600	28.637	24.8774	33.0985	19.2971	19.2043	28.1295	12.6972	18.6722	13.7249	23.3206	15.178	24.6948
CYR4.171503	40.2719	34.1682	52.4089	25.372	24.0609	40.9056	22.8321	20.4368	19.8648	22.2972	15.2646	28.5976
CYR4.185988	21.5073	19.0644	26.8879	22.563	18.4345	24.6477	37.7536	17.5264	14.9386	23.1049	16.2211	17.184
CYR4.191039	6.90315	11.4749	2.89906	14.837	3.27571	4.65709	6.56127	4.86564	4.46133	9.7584	4.22638	3.94791
CYR4.206610	12.5359	9.50226	17.9638	12.5895	10.8966	12.0668	5.42594	4.666	5.07751	8.50497	6.59289	9.62826
CYR4.212202	9.0392	8.19883	12.2382	7.80287	6.64457	9.88545	3.36552	4.31087	3.15699	7.36986	5.3418	6.26389
CYR4.226576	7.07865	5.19459	8.15172	5.42807	4.40038	11.786	17.6431	9.10423	5.10721	5.0336	4.43275	6.04202
CYR4.231210	9.29552	17.1084	1.38801	18.6817	1.26292	3.61001	30.2152	14.238	14.6527	32.915	10.3095	15.1062
CYR4.234591	25.6931	29.8312	39.2535	27.3306	26.1528	28.086	14.0548	21.333	14.1486	26.279	15.6773	20.9779
CYR5.15730	7.07892	9.11427	11.8243	8.72099	8.02833	8.17979	3.12909	5.49506	3.6978	7.77358	5.58894	5.09451
CYR5.17345	28.1406	109.845	17.2259	38.5585	8.08958	1.94203	217.975	206.938	187.633	161.068	114.987	191.892
CYR5.26131	47.4247	44.7715	66.8061	41.8446	44.1711	51.6916	23.2517	28.1946	29.3651	40.4809	31.044	39.8879
CYR5.35676	15.5233	19.8186	25.8576	16.5165	17.1028	3.94796	2.36663	4.86288	4.54151	5.303	4.74723	2.89886
CYR5.37495	7.13515	5.28308	7.53141	4.61513	5.18132	9.87619	19.6219	7.51228	6.08502	4.30646	4.72763	7.81085
CYR5.45964	7.49568	6.95934	7.51998	7.24162	7.46113	8.15881	7.31888	7.70641	6.1794	5.15797	15.2151	7.43625
CYR5.49951	100.405	76.0288	113.439	49.6538	42.9766	115.039	47.0511	49.9691	44.3226	51.9997	27.5759	67.6286
CYR5.53392	4.36069	82.3661	1.0559	35.049	0.600467	0.938658	243.755	220.993	191.234	290.413	187.31	274.019
CYR5.61967	4.42332	16.0359	3.58714	10.3118	4.61088	3.5958	1.55657	5.9297	6.26784	3.55245	2.88641	6.29487
CYR5.80413	0.937401	28.3082	0.48452	9.24259	0.244921	0.367549	190.017	123.344	120.994	134.354	82.2089	150.569
CYR5.83230	19.4837	18.592	27.1586	16.7506	19.1776	19.3607	8.97803	8.69818	8.23355	13.6925	12.093	12.2391
CYR5.91043	7.40388	7.64052	15.3316	6.16878	17.9832	2.80374	0.0792005	3.19898	3.2689	4.14091	2.76558	4.43482
CYR5.91990	4.79931	20.1588	3.79393	11.5288	4.60272	4.67677	2.00071	7.06621	7.00896	2.51052	3.41092	7.28192
CYR5.97387	20.4743	16.3087	21.7632	13.8775	13.7121	17.2463	7.67302	11.7044	9.44075	16.4585	9.32846	12.9905
CYR5.97960	7.88921	9.58872	10.3989	6.65706	6.35527	8.49634	4.4332	5.27962	4.70188	8.21891	7.03275	8.36691
CYR5.99463	2.71334	7.27217	0.623315	5.16571	0.519883	1.10821	12.4644	7.70657	5.08257	14.2004	4.21305	5.63212
CYR5.103155	50.5152	51.9739	67.5924	50.0157	52.0209	48.3739	22.6547	34.6833	26.2099	41.1157	33.7543	37.7251
CYR5.130013	2.33856	6.19224	1.87068	2.74162	0.624105	0.638581	22.2553	16.7239	15.3491	13.5104	7.68374	12.3293
CYR5.134573	167.482	277.427	127.6	225.268	81.4457	55.885	579.904	525.288	468.229	452.99	356.976	419.773
CYR5.135326	44.9276	43.5028	59.0914	37.8061	41.4057	45.8966	16.0189	21.3208	17.2655	33.1883	26.3925	34.8648
CYR5.148899	9.63766	9.82449	13.7526	7.5325	7.86702	10.6966	4.58277	5.62922	5.32312	8.03071	5.15916	6.66203
CYR5.173439	10.6833	10.8344	12.1166	11.0621	11.0941	11.4894	5.78685	7.17514	5.04876	9.68188	9.15255	9.61301
CYR5.174193	10.8191	20.7493	4.01255	16.8569	1.909	0.984776	12.6661	13.2444	8.42026	9.46047	8.26317	9.25577
CYR5.175347	19.0726	21.2061	30.6502	23.0617	28.5853	12.4791	17.1653	23.5025	15.0345	17.0947	17.3304	13.7116
CYR5.203710	7.58636	7.3271	11.2268	7.3057	6.71803	9.10628	3.0722	4.68941	3.55663	5.96613	4.29899	6.34352
CYR5.224964	10.5959	16.768	9.07898	10.6158	4.20287	3.5342	18.3043	24.6165	21.0241	16.382	13.416	20.8263
CYR5.226518	2.54003	3.85901	3.96209	4.39582	2.58823	4.85516	10.0805	4.44455	4.55615	3.99511	2.32411	3.02387
CYR6.17322	486.745	631.886	814.198	497.228	760.167	135.649	685.214	991.688	864.953	932.658	717.876	705.031
CYR6.18747	181.526	200.033	285.592	196.638	174.732	245.18	32.7964	118.973	112.345	151.806	128.184	105.724
CYR6.38496	14.2683	11.9153	18.0988	11.5689	13.3193	14.5334	5.44798	8.21887	6.8693	10.0291	8.81667	9.78346
CYR6.43750	5.04773	30.77	8.00109	15.4771	8.22964	7.2735	4.57889	10.6699	11.1691	4.27504	3.88871	10.6626
CYR6.48185	18.3798	18.9805	24.1821	17.8811	14.7123	21.497	9.69174	12.2523	11.2969	16.4372	9.76653	16.4235
CYR6.52945	16.0534	22.1858	18.8907	14.5212	6.53215	5.29595	9.51726	11.7172	7.53442	7.24659	3.03672	11.5767
CYR6.57991	20.6883	24.3239	20.1426	24.023	13.4229	16.0331	21.6392	18.7972	18.0245	20.6681	14.7504	23.5233
CYR6.60596	20.6128	32.3213	16.3087	23.2583	7.88547	10.4441	25.0481	38.814	44.8094	35.0937	21.9153	34.8966
CYR6.62160	28.46	8.43401	0.840125	0.769542	19.2378	5.46689	2.02024	9.13873	0.642232	0.595636	0.327605	9.82387
CYR6.67940	16.0763	14.5817	19.6161	16.5029	16.7563	15.7162	6.80183	9.30254	7.34025	13.5748	12.9094	14.3968
CYR6.72172	12.7581	55.2552	6.2383	29.1415	2.62445	3.43472	60.2085	51.6748	44.4067	36.8286	25.5294	44.3526
CYR6.79708	28.8302	58.6045	20.2144	39.5793	10.6156	11.2345	89.3541	129.236	115.324	105.382	59.4112	103.397
CYR6.83053	125.689	74.9779	94.1708	93.5103	53.2585	86.0296	52.4112	39.7635	42.4119	45.6209	26.2409	49.1008
CYR6.90965	15.4115	21.4222	29.2741	22.227	29.3257	11.7183	13.7098	17.8658	13.8013	18.6051	15.8155	14.1912
CYR6.95586	26.6489	31.2762	36.5589	26.8811	23.9866	26.1058	13.4089	15.0788	15.9699	24.0507	16.7291	22.3398
CYR6.101807	161.831	147.826	193.109	132.55	126.228	159.251	74.6453	112.67	100.072	119.365	85.5928	130.142
CYR6.102122	9.52369	7.82114	9.22427	9.32104	5.47878	8.03605	2.91862	5.57444	7.05146	6.97586	4.69606	6.19664
CYR6.110106	45.7163	36.1456	67.0607	58.2391	78.1644	62.3627	14.4628	9.58116	8.73563	17.6251	15.1663	14.5452
CYR6.113664	7.97363	7.61461	6.76102	6.7216	4.7589	5.11671	19.5679	6.43018	7.93145	7.13895	4.41066	9.17608
CYR6.121945	11.8102	13.4988	16.5546	13.5095	17.2146	14.0531	3.37005	9.08018	7.6779	10.1348	7.51427	9.80774
CYR6.144490	87.72	71.3756	103.924	54.8265	54.0983	99.5226	49.998	33.5865	34.851	44.9827	27.6584	45.494
CYR6.172458	18.1673	15.7866	28.1095	17.3652	19.6895	19.6115	9.37649	9.56375	7.86592	12.9103	12.3048	13.822
CYR6.173219	15.7327	9.8166	22.7069	10.7839	17.4316	4.55644	17.1716	15.3232	11.4281	13.8232	8.67083	12.4864
CYR6.178419	180.405	211.833	332.383	162.007	205.6	29.5872	193.033	246.563	195.404	179.713	112.719	156.581
CYR6.179486	10.3037	9.71364	12.7226	7.43361	7.04439	10.9417	3.59489	4.22095	4.14665	7.328	4.88425	7.601
CYR6.182737	4.10531	4.36597	4.02284	5.41448	4.06702	4.68648	9.40699	6.01226	5.17422	4.3461	4.38239	6.2449
CYR6.201539	133.077	121.216	173.664	114.654	115.864	144.671	65.8953	62.7567	56.3735	83.1837	63.9749	80.5143
CYR6.202432	3.05609	7.29854	0.960704	5.27994	0.327799	1.46894	11.7334	7.02401	5.69166	11.2613	5.05743	6.46797
CYR6.205834	7.3696	51.329	7.7264	31.0052	6.07148	6.66036	138.74	89.0148	91.8181	112.612	66.588	124.86
CYR6.207431	5.84224	6.22684	8.25389	7.44628	5.31201	4.69595	11.7203	4.69085	4.10384	5.63303	5.07647	5.42142
CYR6.209756	2.34027	7.11103	1.68484	3.52751	0.454225	0.532538	18.8597	14.5106	14.6924	11.963	8.66266	12.0066
CYR6.213641	8.68104	7.18375	11.5835	9.04645	8.78306	9.61086	17.9416	8.32809	10.3308	9.07291	7.0981	8.6
CYR6.223280	5.66803	6.34517	9.35438	6.87809	5.26897	8.03061	14.7144	5.00435	3.57546	4.67406	4.68993	6.62933
CYR6.238631	3.6962	3.97408	8.19913	5.33323	10.1884	1.49455	0.322393	1.81699	1.13591	2.408	1.90385	2.31296
CYR6.243452	7.49857	8.34009	9.50675	6.52412	7.20837	7.34689	4.09088	4.44543	5.16794	7.84852	6.38452	8.08477
CYR7.4054	72.6304	209.955	66.9728	673.696	37.5859	27.2541	97.574	54.2141	62.3746	12.5654	57.548	136.265
CYR7.9166	14.6583	12.1582	17.6358	12.424	12.7834	14.8297	5.95211	8.5974	6.95281	9.6044	9.14058	11.3978
CYR7.14699	146.646	93.212	231.793	78.5114	113.096	223.708	65.9754	39.7379	46.5588	50.0929	33.7067	56.6951
CYR7.20093	56.0002	51.55	68.5748	43.3376	38.2915	57.791	25.8158	29.2362	25.3595	39.8084	31.9658	37.669
CYR7.20572	263.387	222.543	377.76	257.248	207.675	387.195	63.1293	91.8985	48.7257	81.2277	48.0711	66.6041
CYR7.31212	57.3578	60.0774	77.5536	54.5114	55.7534	68.1186	37.014	35.032	34.5037	51.9876	35.4535	52.3557
CYR7.34076	18.2712	15.5516	22.9513	15.8057	13.7747	20.8995	7.50016	8.60422	9.34497	12.306	10.8282	11.7041
CYR7.34456	163.255	166.257	201.9	106.443	94.4245	137.684	67.4281	88.142	70.4002	105.715	65.6054	110.171
CYR7.36390	78.8058	77.8231	89.1841	49.5246	49.0981	77.9263	33.9485	44.5025	39.0393	54.6501	34.3824	63.9942
CYR7.46567	14.3894	16.0317	18.6325	13.355	13.3387	13.0838	5.77861	9.49896	6.84376	11.7424	10.5167	10.2901
CYR7.51092	109.373	117.129	127.213	101.031	56.5729	142.777	71.4815	76.0417	83.8537	66.4463	45.5322	71.1528
CYR7.51192	55.4057	106.022	43.5308	73.908	22.368	14.475	228.907	210.372	202.643	176.657	136.775	170.491
CYR7.53191	12.0251	13.2652	17.7119	14.6595	14.5175	11.8675	4.66859	10.5108	6.63935	10.0183	9.66559	9.69941
CYR7.58303	4.84382	4.4368	9.51269	3.84065	10.6822	1.96805	0.1592	2.39265	2.00329	2.19981	2.04378	2.84147
CYR7.72729	11.0054	9.58825	13.3066	9.32462	8.13778	11.9144	6.68124	5.96464	4.94712	7.87726	6.12456	7.84561
CYR7.74123	7.75312	9.76288	10.7165	6.82387	6.78521	9.4348	3.80162	5.57961	5.50132	7.03955	6.18189	9.03595
CYR7.76953	243.254	141.135	407.945	156.273	378.249	307.035	65.6802	114.049	111.672	114.582	85.7042	115.739
CYR7.77284	19.7642	19.4294	16.4702	15.4471	20.3762	19.0373	18.7194	17.0264	14.6642	13.6372	32.1888	17.6237
CYR7.78518	11.4493	15.7909	20.8245	21.8317	14.3971	14.7452	33.3307	16.173	14.1813	16.4363	15.4136	15.0803
CYR7.80930	11.0253	9.41388	12.9225	9.91421	9.07352	10.3483	4.57046	4.96657	5.32271	6.6936	5.52231	7.87213
CYR7.84459	46.2306	45.1686	65.6742	49.0286	44.129	54.7445	24.4406	26.995	23.9251	41.0423	28.9527	36.8682
CYR7.85332	7.33093	5.58227	10.6828	5.10834	6.36005	8.27259	2.70408	3.95111	5.44427	5.08667	4.32	4.41626
CYR7.85584	224.192	328.752	398.144	248.3	420.461	56.0677	331.427	556.191	453.177	507.106	408.015	373.001
CYR7.88377	19.4792	18.6273	25.8148	17.4317	20.5683	19.1858	9.60732	8.18386	7.86992	14.2813	13.4461	12.6579
CYR7.90753	20.0276	20.1507	21.1664	17.9336	14.5512	16.6903	83.6936	25.7107	25.5861	21.4551	15.7932	19.4215
CYR7.95089	7.65727	8.81176	11.7683	9.48636	10.4035	10.121	2.67867	4.42492	3.71938	6.96806	6.64046	7.43493
CYR7.105450	145.852	233.059	134.449	132.541	89.8625	99.0495	594.538	319.079	373.956	212.386	76.6018	305.124
CYR7.112305	6.56267	6.80093	3.24926	8.69261	3.05031	5.19376	2.42825	4.48823	2.44446	5.85061	1.56872	2.30271
CYR7.124934	8.28091	10.6483	10.7522	8.53567	9.41639	8.9466	3.60619	4.40998	3.1508	6.40344	4.68196	5.95308
CYR7.127214	22.9746	26.2983	36.267	22.5853	20.7013	19.9641	10.507	13.7867	11.5586	18.851	14.9349	21.6457
CYR7.127867	25.491	28.5864	35.8555	25.6077	23.412	25.4236	11.0992	18.6795	12.1045	21.8192	14.526	19.314
CYR7.141131	101.332	111.617	153.569	122.393	114.204	119.029	40.5886	57.0939	49.3975	97.6855	73.7272	91.9657
CYR7.142221	8.38505	9.35372	8.74723	6.64327	10.9241	9.51414	9.11707	7.58514	7.01458	5.39908	16.7204	8.15904
CYR7.146144	16.0222	19.1726	18.9606	15.5563	16.3263	14.8919	5.1506	10.4678	8.29598	12.5903	9.9063	13.3061
CYR7.152952	903.551	1219.82	629.598	1124.88	434.319	482.082	171.64	507.577	324.031	397.427	242.302	255.441
CYR7.153677	29.2677	58.1245	32.6984	53.2466	42.951	5.13042	22.3096	41.9865	31.2502	42.5182	42.3188	29.3968
CYR7.159607	8.55641	5.60765	7.98526	5.96624	6.04048	7.00174	2.66332	1.78694	1.43631	1.63404	1.17227	2.19704
CYR7.162739	43.1383	85.395	42.2058	42.0261	22.5385	17.066	127.895	101.713	93.7195	85.78	49.335	88.3433
CYR7.172695	58.0546	11.5748	159.857	23.3807	125.732	66.4716	8.7242	6.93409	5.95733	8.93132	4.98123	7.34475
CYR7.184665	1272.89	2508.45	1530.12	1443.82	1071.58	217.126	2142.94	2991.78	2469.37	2554.42	2115.22	2517.78
CYR7.189876	4.45542	5.66135	4.91401	5.1178	4.08139	5.50551	9.87435	4.67355	4.16105	4.28795	2.71217	3.75038
CYR7.196218	4.27445	11.7688	2.05155	11.9995	2.1926	3.33486	4.9457	3.90231	2.68851	8.71786	2.89523	2.63088
CYR7.205810	7.30345	8.18806	12.4097	10.7274	9.28119	8.42428	15.1349	6.4377	6.75558	6.93199	6.37887	6.09626
CYR8.9683	7.97141	7.5065	11.2595	6.51085	6.19569	10.0665	4.15295	5.8132	4.91845	7.90679	6.7741	10.3163
CYR8.10252	32208.9	24592.8	23097.2	30859.9	31462.7	36712.9	20736.7	27780.7	31842.6	31405.2	19777.7	26647.8
CYR8.12970	26.9406	22.113	23.9015	24.5562	15.3065	21.49	78.8693	23.9989	24.6016	25.4835	18.2944	25.4913
CYR8.13735	5.38308	6.00495	9.90986	5.07175	11.9724	2.39619	0.167229	2.27769	2.35684	1.43642	1.63161	2.28247
CYR8.22255	6.89461	12.3907	2.50776	15.7974	3.32258	5.55685	6.61505	7.40619	5.31393	10.6304	3.63709	4.58335
CYR8.32638	3717.1	8045.98	2670.13	6958.72	1802.02	1592.11	17829.5	10202.4	11455.2	13114.1	10826.1	10809.6
CYR8.56762	10.6198	11.7517	14.8221	12.3883	13.621	13.028	2.87566	5.99323	6.60391	8.25587	7.38342	8.68012
CYR8.64742	26.0867	24.1326	36.0051	21.7095	24.8114	27.8171	11.8348	12.3122	11.2217	16.947	14.1002	18.2055
CYR8.75285	77.9058	82.8523	118.117	71.4461	69.1946	86.466	36.5104	42.3251	38.6367	66.8449	48.1973	64.8846
CYR8.81622	14.619	13.415	18.1727	11.083	8.83857	13.9718	5.80177	8.01889	7.4258	10.7716	8.17172	12.7627
CYR8.85373	8.32873	7.51391	7.69264	7.78453	5.01625	6.78378	4.38121	5.67006	6.27266	7.12651	4.69958	7.49605
CYR8.88004	9.27496	8.41389	12.2687	8.45719	6.80288	11.1768	2.66732	5.44046	4.52637	7.62749	5.28312	5.22747
CYR8.90373	43.0778	43.819	62.2487	34.0906	27.5854	47.1716	18.2078	25.1611	20.3562	33.4106	25.3975	39.1519
CYR8.91607	9.13044	7.95163	12.238	7.13607	8.30254	10.1233	6.03246	6.12586	4.84178	7.36746	5.02335	6.84703
CYR8.93674	163.912	163.725	189.723	99.1784	87.7728	130.259	63.9793	85.7898	69.2594	103.519	63.5286	109.845
CYR8.97376	4.03082	18.4208	4.69467	13.6096	4.27161	4.41738	2.01104	6.61155	6.44149	3.75518	3.66136	6.39818
CYR8.97508	127.559	146.351	228.169	118.294	151.828	21.8589	140.062	168.462	138.79	131.604	87.2481	106.243
CYR8.99276	5.60416	7.53186	3.62082	10.4447	2.96508	6.24874	3.23838	4.8211	2.46038	7.71273	2.00808	2.77987
CYR8.114315	708.866	2345.65	448.969	840.909	152.21	58.8772	5426.96	4917.71	4825.87	4058.79	2218.72	4211.91
CYR8.117249	14.0228	9.77503	15.8581	12.3029	12.4211	20.541	4.67661	3.07499	4.23706	4.13341	2.20137	3.70977
CYR8.120296	16.0194	21.8524	28.8187	20.7118	28.595	10.5326	14.3963	19.6034	13.4225	17.9694	14.0411	13.1197
CYR8.121964	148.324	148.35	173.43	138.507	143.052	117.757	65.8414	130.479	116.359	111.23	88.0239	107.339
CYR8.128654	34.0242	19.4503	33.6636	25.5782	21.0076	25.95	4.57729	2.68722	3.29132	3.96829	2.6443	3.83313
CYR8.140703	16.7355	18.7586	25.0588	12.7408	15.4952	22.6294	11.8778	9.90273	8.20725	10.6565	8.33702	15.9387
CYR8.144665	24.9122	27.9859	35.2667	22.7598	21.0967	23.4241	10.9701	16.1264	13.8594	19.9107	15.1253	20.9619
CYR8.146536	78.9056	69.637	89.2106	66.2529	63.6738	78.4011	32.4831	44.5191	37.4807	54.1285	42.9204	56.242
CYR8.163739	11.7656	8.02951	11.0624	10.9659	9.18935	8.37842	47.2999	15.011	15.5847	12.096	10.0746	12.8832
CYR8.165335	8.46593	27.6896	11.6115	9.66486	4.71717	7.93961	9.65344	3.698	49.3496	4.59202	1.24621	20.1571
CYR8.187387	109.21	119.41	159.139	121.64	129.699	111.061	57.1089	68.9704	52.895	104.317	89.8734	80.625
CYR8.191112	79.6846	68.5499	95.1989	56.1551	62.0149	98.2456	32.5208	42.987	39.4881	47.6414	36.2403	56.965
CYR8.216277	18.9781	18.5445	25.9817	17.4137	20.1901	20.2952	8.76884	9.30532	8.15938	12.9575	11.6102	14.5976
CYR8.224597	15.5133	16.613	20.2845	15.3361	15.0387	15.8684	5.80012	11.1643	8.23183	14.701	10.0095	12.645
CYR8.225649	8.02895	4.75831	7.87695	5.49727	5.90498	11.3306	18.0576	9.89443	4.54454	5.39497	3.67047	9.0054
CYR8.230808	4.24604	89.8402	1.20553	38.5141	0.609383	0.571558	244.458	227.778	194.21	289.509	188.176	274.291
CYR9.10524	53.8494	27.6548	52.0008	23.9086	16.8306	50.311	12.2311	4.57761	4.42489	3.71131	3.38574	6.35384
CYR9.12080	65.3148	40.5148	79.0004	73.3035	66.0948	60.1896	20.2237	14.7387	12.5662	23.283	19.4451	20.5496
CYR9.14019	51.3118	105.13	41.4694	69.969	22.3599	14.5237	211.977	197.201	186.239	163.495	128.734	159.48
CYR9.14987	46.722	850.989	23.9956	542.63	17.6385	14.5527	769.784	880.21	732.378	1143.18	808.129	879.616
CYR9.20951	26.0309	20.9223	28.7602	26.0875	16.8752	20.8659	76.0922	25.415	26.3588	26.0762	21.228	23.4365
CYR9.20962	65.3815	35.3068	75.5918	44.3486	45.2203	86.7155	20.5507	9.65185	11.9874	15.9234	10.9475	16.4678
CYR9.30774	37.636	34.0404	51.3993	26.1298	23.641	39.8938	21.8365	18.6894	19.1927	23.6784	15.6246	27.7365
CYR9.31648	34.8635	21.1869	34.1838	25.3513	22.0846	26.1968	6.58862	3.68197	3.44225	3.48839	3.29768	3.91112
CYR9.39425	14.2159	13.4076	17.3677	12.9144	11.7893	14.6453	5.39059	7.4232	7.05983	9.88985	8.94939	11.0994
CYR9.53148	54.6206	54.8258	63.3333	39.0887	37.1553	56.677	23.4255	28.8111	27.8232	37.2593	25.3999	44.4707
CYR9.60370	2.76572	7.1305	2.2526	3.40617	0.683203	0.373797	18.8163	14.0147	15.1153	14.1961	8.14959	12.7046
CYR9.81492	75.5599	33.886	151.141	40.7925	120.757	149.439	31.1179	22.1743	25.5092	22.8108	15.8522	22.7627
CYR9.98860	16.7527	10.7074	12.6154	10.5725	9.15666	11.1954	44.4874	18.0996	19.1227	16.0229	11.6326	15.0152
CYR9.99726	11.1807	14.4439	15.4349	13.3	14.0918	13.8891	22.8837	9.21222	10.9163	12.2087	10.6865	11.4966
CYR9.104461	5.04814	15.8869	8.37915	10.7796	5.57261	6.89236	22.0786	17.4745	13.7884	7.17654	5.03893	11.5902
CYR9.123066	11.147	21.588	3.97827	20.3922	1.62265	0.975598	12.8479	14.0254	11.7452	10.115	9.27224	10.5482
CYR9.133390	48.6133	34.7179	57.0701	40.0385	41.1774	46.4824	25.0903	36.423	31.4574	24.5894	21.4345	31.0255
CYR9.135590	22.9345	22.913	33.6854	19.6611	22.5948	25.5915	9.80308	16.1784	12.5413	19.2712	13.4589	19.2028
CYR9.146951	9.51806	15.9479	6.85238	10.149	3.87948	3.50872	18.4244	21.1442	23.8245	17.6768	11.9946	15.9715
CYR9.152983	31.9947	48.6087	4.15112	51.0286	1.67869	3.39758	6.12019	5.54104	5.19607	5.23215	2.95346	6.3482
CYR9.153042	24.8387	20.1263	34.7256	20.682	19.6305	31.2383	1.65674	5.61966	2.40905	4.2623	2.03236	3.99422
CYR9.167253	35.399	33.2039	41.367	29.411	29.8499	31.6255	13.6996	18.5238	20.7305	25.7439	18.4162	23.7584
CYR9.168896	12.3152	13.0522	15.3916	16.5938	12.482	13.2138	23.7391	8.76207	10.0089	10.7221	9.06384	10.8296
CYR9.171278	4.29409	87.8554	1.53619	38.3625	0.526691	0.721998	248.661	227.411	192.251	285.183	192.629	271.128
CYR9.176355	19.0929	17.0474	27.3444	15.9268	19.6797	18.5517	8.61812	8.52538	9.26243	13.1538	11.6944	13.1133
CYR9.177432	7.90125	9.31233	10.9267	8.37418	8.3765	8.23794	4.14024	4.46281	4.64617	6.13411	4.25212	5.32075
CYR9.182210	7.50111	7.07208	11.3053	6.30097	6.2386	10.05	4.76944	5.52539	5.76155	8.43091	7.34748	10.0149
CYR9.183427	26.9603	22.9198	26.893	23.8348	20.8833	18.711	105.353	34.5211	33.9695	27.4914	23.7617	29.8548
CYR9.186821	79.0414	78.6698	104.155	69.2658	68.95	88.2121	32.6303	45.6468	39.7936	63.2327	44.637	64.2482
CYR9.196672	5.60917	9.03319	2.98381	10.0283	2.42914	6.12029	2.7031	3.5099	2.88121	5.87879	1.79633	2.00329
CYR9.199406	9.63123	13.5252	12.3893	8.44298	10.035	1.78292	12.618	18.7143	13.4451	12.5661	8.41196	13.6351
CYR9.203443	9.76526	25.2431	12.4298	8.74914	4.14203	7.61811	9.29037	4.66774	49.807	4.03436	2.10799	19.8105
CYR9.204361	24.0767	29.359	19.4736	23.3068	8.71239	11.2798	40.4156	52.4614	46.2539	40.9822	29.092	40.2781
CYR9.215714	15.5548	15.2319	31.767	14.465	41.1294	6.79976	0.97547	9.50951	6.47579	8.17203	7.22942	8.04558
CYR9.223950	14.1282	15.0776	17.0442	13.0621	14.2793	16.3204	5.86097	8.5027	6.09678	12.6465	9.43031	13.3097
CYR9.225106	8.98312	9.63956	11.4197	9.61425	9.07114	10.7769	3.94591	5.77521	5.26555	8.84175	7.63384	9.05642
CYR9.238942	27.7136	209.014	5.64299	93.5605	4.54767	2.66014	217.033	333.895	279.861	353.35	242.555	282.166
CYR9.247676	5.11664	4.84861	5.05027	5.62573	4.94864	4.42045	8.65347	4.80314	3.4647	4.33341	4.39315	6.12571

## Sheet: protozoacontig analysis
	3-NOP	CON	SEM	P-VALUE	FC
CYR7.172695	74.1785	7.14549	24.3055	0.0039	10.3812
CYR18.64224	11.953	1.43529	5.05077	0.0039	8.32791
CYR13.121781	28.2873	3.49999	3.21205	0.0039	8.08211
CYR8.128654	26.6123	3.50026	2.8215	0.0039	7.60295
CYR9.153042	25.2069	3.32905	3.2403	0.0039	7.5718
CYR11.109190	51.6474	6.83068	14.683	0.0039	7.5611
CYR18.163094	10.6916	1.43262	2.50479	0.0039	7.463
CYR10.88481	39.6744	5.45046	8.46492	0.0039	7.27909
CYR17.192611	25.6062	3.57016	2.93959	0.0039	7.17227
CYR12.70219	18.0199	2.66557	3.75957	0.0039	6.76022
CYR9.31648	27.3112	4.06834	2.92102	0.0039	6.71309
CYR18.178900	57.6369	8.6329	6.34315	0.0039	6.67642
CYR16.9531	26.231	4.03019	3.1889	0.0039	6.50864
CYR9.10524	37.4259	5.78074	8.0665	0.0039	6.47424
CYR12.43266	15.4021	2.40169	1.41368	0.0039	6.41303
CYR15.174898	19.7286	3.10359	1.75497	0.0039	6.35672
CYR18.171179	11.8003	1.92586	1.52799	0.0039	6.1273
CYR18.28027	30.6484	5.04568	5.68851	0.0039	6.07418
CYR17.187860	11.809	1.98691	1.33605	0.0039	5.94342
CYR18.170069	16.3322	2.80004	2.16756	0.0039	5.83286
CYR17.102906	20.6654	3.61612	1.94775	0.0039	5.7148
CYR16.65559	13.9778	2.45666	0.92272	0.0039	5.68977
CYR16.176808	26.2703	4.62644	2.37687	0.0039	5.67831
CYR10.201134	15.975	2.88105	2.20865	0.0039	5.54486
CYR13.108934	65.9042	11.9106	33.1199	1	5.53326
CYR11.208517	14.6283	2.80543	1.77448	0.0039	5.21428
CYR12.154083	21.4702	4.18582	1.45698	0.0039	5.12926
CYR17.124388	8.91155	1.74381	0.65047	0.0039	5.11039
CYR18.26809	24.0557	4.81117	2.39144	0.0039	4.99996
CYR16.149394	10.3446	2.12708	1.27728	0.0039	4.86329
CYR18.9274	9.49567	1.9569	1.1165	0.0039	4.8524
CYR14.120474	24.1982	5.02351	9.90161	0.3367	4.81698
CYR17.210108	19.1902	4.0831	1.96005	0.0039	4.6999
CYR9.152983	23.4766	5.23185	10.0074	0.7488	4.48724
CYR17.89839	7.38339	1.67901	0.93581	0.0039	4.39747
CYR6.110106	57.9481	13.3527	7.56547	0.0039	4.33981
CYR7.20572	285.968	66.6094	38.8458	0.0039	4.29321
CYR17.249423	13.4889	3.15417	0.60235	0.0039	4.27653
CYR12.139123	8.25464	1.95274	0.63116	0.0039	4.22721
CYR18.186558	12.6218	3.02274	0.88977	0.0039	4.17563
CYR16.235773	21.3001	5.1147	4.43655	0.0104	4.16448
CYR18.147001	9.47476	2.27978	0.71055	0.0039	4.156
CYR17.141844	15.1869	3.66609	1.60298	0.0039	4.14254
CYR9.20962	58.7608	14.2548	9.94499	0.0039	4.12219
CYR12.41888	18.6669	4.53666	2.09474	0.0039	4.11467
CYR14.128961	98.2204	24.0698	24.8141	0.0039	4.08065
CYR9.81492	95.2626	23.3712	23.4975	0.0039	4.07607
CYR12.127124	13.0027	3.1913	1.26761	0.0039	4.07443
CYR8.13735	6.7897	1.69204	1.77404	0.0039	4.01273
CYR5.35676	16.4611	4.12002	3.41546	0.025	3.9954
CYR10.110527	24.5721	6.18796	3.49161	0.0039	3.97095
CYR2.155794	16.8562	4.26424	3.78377	0.025	3.95292
CYR11.96079	9.59964	2.44724	1.50561	0.0039	3.92264
CYR13.185685	13.0575	3.33772	1.66974	0.0039	3.91209
CYR18.134872	10.0187	2.56157	0.73595	0.0039	3.91117
CYR15.14441	59.9057	15.4611	10.5836	0.0039	3.8746
CYR17.73957	23.2542	6.01939	2.63994	0.0039	3.86321
CYR8.117249	14.1535	3.6722	1.88805	0.0039	3.85423
CYR10.147714	47.9534	12.5089	5.95138	0.0039	3.83354
CYR7.159607	6.85963	1.81499	0.71027	0.0039	3.77943
CYR10.38408	17.0356	4.52433	2.52067	0.0039	3.76533
CYR10.12825	15.1137	4.09018	1.59158	0.0039	3.69511
CYR16.237117	23.363	6.37252	2.54887	0.0039	3.66621
CYR12.57225	11.7343	3.21576	0.93039	0.0039	3.64901
CYR10.135430	18.8754	5.30762	4.00104	0.025	3.55628
CYR13.21689	12.2409	3.52683	7.90539	0.2623	3.47079
CYR9.12080	64.0696	18.4677	7.06347	0.0039	3.46928
CYR11.235392	22.0712	6.4343	4.78042	0.0374	3.43024
CYR10.130948	9.29568	2.73112	1.02899	0.0039	3.40361
CYR11.230004	8.32283	2.45481	1.47514	0.0039	3.39042
CYR10.61157	9.56627	2.82491	1.54759	0.0039	3.3864
CYR14.11765	83.8561	24.9427	11.9885	0.0039	3.36195
CYR10.82866	11.6158	3.47446	1.35243	0.0039	3.3432
CYR16.176460	36.1285	10.8562	6.58157	0.0039	3.32791
CYR10.175761	29.5413	8.88455	5.31709	0.0039	3.32501
CYR6.238631	5.48094	1.65002	1.62597	0.025	3.32174
CYR10.16168	27.2631	8.28655	4.39643	0.0039	3.29004
CYR14.185246	18.2246	5.56149	5.99748	0.0374	3.27692
CYR17.62914	11.5541	3.52642	7.25774	0.5218	3.27644
CYR14.48988	24.6196	7.54309	4.11822	0.0039	3.26386
CYR15.232775	8.13212	2.49475	1.61128	0.0039	3.25969
CYR16.81193	30.2962	9.31011	5.42211	0.0039	3.25412
CYR14.24325	96.6266	29.9486	14.7699	0.0039	3.22641
CYR14.144675	11.5696	3.59299	7.34934	0.3367	3.22004
CYR15.120319	23.0315	7.1783	7.3554	0.0374	3.20849
CYR5.91043	9.55528	2.9814	3.01261	0.025	3.20496
CYR17.161572	25.7262	8.02934	3.83335	0.0039	3.20402
CYR16.77516	24.2331	7.61726	3.56887	0.0039	3.18134
CYR13.19300	15.5185	4.9046	4.53834	0.0374	3.16407
CYR1.70637	57.9533	18.4087	7.63197	0.0039	3.14814
CYR16.16535	7.79749	2.5129	2.27338	0.0065	3.10298
CYR18.196249	10.9356	3.52884	6.61234	0.5218	3.09893
CYR9.215714	20.8246	6.73463	6.4785	0.025	3.09217
CYR7.58303	5.8807	1.94003	1.77823	0.0374	3.03124
CYR7.14699	147.828	48.7945	31.6986	0.0039	3.0296
CYR18.220383	7.5935	2.51782	2.51121	0.0374	3.0159
CYR16.179733	43.0073	14.2698	7.22889	0.0039	3.01387
CYR18.112871	284.117	96.3719	37.2697	0.0039	2.94813
CYR2.130683	11.325	3.86992	6.81294	0.3367	2.92641
CYR17.19462	202.965	69.9692	42.9337	0.0039	2.90077
CYR16.21998	35.616	12.559	6.80429	0.0039	2.8359
CYR6.62160	10.5347	3.75805	6.36116	0.2002	2.80324
CYR11.143299	38.5581	13.9012	5.89197	0.0039	2.77372
CYR16.104573	78.5923	28.5852	21.3511	0.0104	2.74941
CYR1.157198	265.351	96.7635	54.0934	0.0039	2.74227
CYR13.179605	27.3851	10.0182	5.23243	0.0039	2.73353
CYR16.239903	158.019	58.2667	32.3345	0.0039	2.712
CYR7.76953	272.315	101.238	54.0847	0.0039	2.68986
CYR4.39819	234.771	87.8641	152.58	0.5218	2.67198
CYR2.215818	265.099	100.076	54.5046	0.0039	2.64898
CYR13.66226	229.123	87.0767	151.032	0.5218	2.63128
CYR14.69474	773.695	297.762	174.845	0.0065	2.59836
CYR7.4054	181.349	70.0902	119.304	0.5218	2.58737
CYR16.58084	18.1651	7.08018	4.06099	0.0374	2.56562
CYR13.102168	777.302	302.995	177.276	0.0065	2.5654
CYR7.152952	799.042	316.403	185.621	0.0104	2.52539
CYR10.157670	23.7731	9.41455	4.40513	0.0039	2.52514
CYR14.41875	4069.9	1632.95	439.685	0.0039	2.49235
CYR10.151150	8.45812	3.50885	1.72876	0.0065	2.41051
CYR18.43097	7.90006	3.32075	1.60022	0.0039	2.379
CYR10.178714	137.38	57.9441	28.3986	0.0065	2.37091
CYR15.124872	27.7009	11.7766	4.41413	0.0039	2.3522
CYR11.1583	12.7764	5.64533	1.53546	0.0039	2.26317
CYR13.84685	150.265	66.5054	23.2016	0.0039	2.25944
CYR3.23250	78.7666	36.1447	10.0241	0.0039	2.1792
CYR10.79537	89.7064	41.5123	13.6703	0.0039	2.16096
CYR3.191502	218.721	102.026	32.6394	0.0039	2.14377
CYR15.122611	91.4728	42.9934	13.9884	0.0065	2.1276
CYR11.83432	95.0653	44.7045	15.5675	0.0065	2.12653
CYR15.81830	128.993	61.3344	21.4682	0.0039	2.10311
CYR16.64190	31.9781	15.3546	6.50314	0.0104	2.08264
CYR3.39137	23.7481	11.4099	2.75759	0.0039	2.08136
CYR6.83053	87.9393	42.5915	13.5363	0.0039	2.06471
CYR14.195114	340.669	166.579	44.0709	0.0039	2.04508
CYR13.187299	12.9585	6.40933	2.04497	0.0039	2.02182
CYR2.49125	78.8063	39.0628	13.784	0.0039	2.01742
CYR15.245050	125.689	62.3732	12.9167	0.0039	2.01511
CYR12.105744	29.3595	14.5729	3.44466	0.0039	2.01466
CYR7.124934	9.43	4.70091	0.95283	0.0039	2.00599
CYR6.144490	78.5778	39.4284	12.4327	0.0039	1.99292
CYR10.58086	22.3383	11.2207	2.73484	0.0039	1.9908
CYR12.69564	40.9685	20.615	3.45292	0.0039	1.98732
CYR14.132220	75.4302	38.065	12.776	0.0039	1.98162
CYR4.143806	77.5978	39.2451	12.2341	0.0039	1.97726
CYR6.18747	213.95	108.305	33.9609	0.0039	1.97544
CYR1.116495	80.2748	40.9327	8.91803	0.0039	1.96114
CYR10.18175	77.2065	39.4184	12.5251	0.0039	1.95864
CYR12.40001	12.9622	6.62901	2.23878	0.0065	1.95537
CYR15.135560	74.4667	38.0911	12.6417	0.0039	1.95496
CYR1.137692	14.9275	7.63887	1.80294	0.0039	1.95415
CYR6.201539	133.858	68.7831	13.5741	0.0039	1.94608
CYR17.194219	7.20032	3.70096	3.24525	0.2002	1.94553
CYR14.49767	16.5105	8.48825	8.44597	0.631	1.94511
CYR18.86809	46.2567	23.8885	6.13018	0.0039	1.93636
CYR9.196672	6.03398	3.12877	1.86278	0.0782	1.92855
CYR16.152637	8.79067	4.56181	0.92508	0.0039	1.92701
CYR4.92683	20.5498	10.6791	2.41705	0.0039	1.9243
CYR13.214361	55.6486	28.9315	5.74365	0.0039	1.92346
CYR12.163721	77.5802	40.3713	12.8336	0.0039	1.92166
CYR17.249612	45.6187	23.7708	4.60432	0.0039	1.91911
CYR10.78435	132.844	69.3233	13.4523	0.0039	1.9163
CYR2.12308	20.6542	10.7787	2.15145	0.0039	1.9162
CYR8.56762	12.7051	6.63204	1.4542	0.0039	1.91572
CYR11.59676	75.7579	39.5605	13.3301	0.0039	1.91499
CYR8.64742	26.7604	14.1036	3.2041	0.0039	1.89742
CYR4.206610	12.5925	6.64926	1.99795	0.0065	1.89382
CYR17.105583	8.91028	4.71018	1.11931	0.0039	1.89171
CYR5.83230	20.0872	10.6557	2.40946	0.0039	1.88511
CYR1.9524	20.6901	10.9845	2.68819	0.0039	1.88357
CYR11.12723	18.4411	9.82564	4.08693	0.025	1.87683
CYR12.117895	9.28304	4.95722	0.94735	0.0039	1.87263
CYR18.113866	19.9244	10.6554	2.00509	0.0039	1.8699
CYR17.238235	132.167	70.692	14.278	0.0039	1.86962
CYR14.27795	12.8781	6.88862	7.92727	0.7488	1.86948
CYR10.13188	8.90489	4.76835	0.86623	0.0039	1.8675
CYR16.51087	45.0818	24.1872	5.38128	0.0039	1.86387
CYR2.33520	12.9204	6.94652	1.73136	0.0039	1.85998
CYR15.77074	8.89734	4.78548	1.05754	0.0039	1.85924
CYR8.216277	20.2339	10.8998	2.27945	0.0039	1.85635
CYR3.137028	11.659	6.29617	1.98889	0.0065	1.85175
CYR15.93925	19.9335	10.8288	2.1345	0.0039	1.84079
CYR17.199472	46.3042	25.1671	5.12034	0.0039	1.83987
CYR13.170317	124.006	67.4087	15.8991	0.0039	1.83961
CYR9.177432	8.85481	4.82603	0.76846	0.0039	1.8348
CYR7.88377	20.1845	11.0077	2.34462	0.0039	1.83367
CYR8.88004	9.39907	5.1287	1.46976	0.0065	1.83264
CYR6.179486	9.69329	5.29595	1.58667	0.0163	1.83032
CYR5.135326	45.4384	24.8418	6.23971	0.0039	1.82911
CYR7.95089	9.70803	5.31107	1.37761	0.0039	1.82789
CYR9.176355	19.6072	10.7279	2.54035	0.0039	1.82767
CYR17.70300	19.4707	10.6572	2.1718	0.0039	1.827
CYR4.41224	40.4181	22.1425	3.30221	0.0039	1.82536
CYR17.59729	7.35091	4.02848	1.18012	0.0065	1.82474
CYR13.20806	23.3988	12.8425	2.93288	0.0039	1.82199
CYR6.121945	14.4401	7.93082	1.84866	0.0039	1.82076
CYR17.181542	46.6602	25.6451	9.05	0.0104	1.81946
CYR10.120709	10.949	6.0247	1.10088	0.0039	1.81735
CYR18.6772	9.02166	4.98549	3.59969	0.3367	1.80958
CYR16.13666	19.9395	11.0401	2.41586	0.0039	1.8061
CYR4.212202	8.96819	4.96816	1.47338	0.0065	1.80513
CYR17.128874	8.5385	4.73134	1.34084	0.0104	1.80467
CYR6.172458	19.7883	10.9739	2.73141	0.0039	1.80322
CYR14.64046	7.44729	4.13092	3.53473	0.2002	1.80282
CYR14.111626	19.6959	10.9261	2.34236	0.0039	1.80264
CYR14.50010	45.9329	25.5139	6.18666	0.0039	1.80031
CYR8.191112	76.6415	42.6404	10.6928	0.0065	1.79739
CYR7.80930	10.4496	5.82463	1.07223	0.0039	1.79404
CYR11.217287	11.8022	6.61547	1.63776	0.0039	1.78403
CYR1.41262	63.2187	35.4969	9.24947	0.0065	1.78096
CYR7.34076	17.8756	10.0479	2.19674	0.0039	1.77904
CYR14.1469	10.7979	6.07346	1.64835	0.0104	1.77788
CYR16.102821	83.4242	47.0347	17.9933	0.0782	1.77367
CYR3.21864	20.1238	11.4025	2.11549	0.0039	1.76486
CYR5.203710	8.21171	4.65448	1.21543	0.0039	1.76426
CYR15.160462	43.5718	24.7021	8.70542	0.0374	1.76389
CYR14.160732	11.1293	6.3096	1.18031	0.0039	1.76387
CYR17.236286	75.6031	42.928	13.9421	0.025	1.76116
CYR7.141131	120.357	68.4097	16.7624	0.0039	1.75936
CYR7.112305	5.59159	3.1805	1.56297	0.0374	1.75809
CYR10.103317	12.6405	7.19791	2.09226	0.0104	1.75613
CYR4.38908	63.8966	36.4289	8.40496	0.0065	1.75401
CYR17.180112	36.1125	20.6899	3.85109	0.0039	1.74542
CYR17.239258	10.3917	5.95709	1.04441	0.0039	1.74442
CYR3.168004	17.0897	9.79935	2.05147	0.0039	1.74396
CYR18.52916	12.8158	7.34891	2.0586	0.0104	1.7439
CYR14.156671	86.1547	49.5057	12.5856	0.0163	1.7403
CYR11.164528	39.3948	22.6421	11.1398	0.1495	1.73989
CYR1.204271	12.4732	7.18035	1.07098	0.0039	1.73713
CYR11.185356	58.0523	33.4587	6.53691	0.0039	1.73505
CYR18.218806	75.9113	43.9343	14.6672	0.0374	1.72784
CYR13.87435	8.61571	4.98937	1.06416	0.0039	1.72681
CYR2.233173	40.2886	23.3428	4.90755	0.0039	1.72595
CYR5.49951	82.9238	48.0912	18.2147	0.1093	1.7243
CYR3.67547	39.2845	22.8039	4.90306	0.0039	1.72271
CYR5.15730	8.82444	5.12983	1.33112	0.0065	1.72022
CYR2.191394	39.4707	22.9538	5.29835	0.0039	1.71957
CYR11.48242	23.5836	13.7264	2.54112	0.0039	1.71812
CYR4.37635	15.6373	9.11049	1.62293	0.0039	1.7164
CYR8.140703	18.5697	10.82	3.04615	0.0104	1.71624
CYR7.34456	144.994	84.5771	24.5554	0.0163	1.71434
CYR14.29158	196.618	114.83	21.7887	0.0039	1.71226
CYR8.97376	8.24081	4.81313	3.32667	0.3367	1.71215
CYR11.60020	24.193	14.1426	3.03132	0.0039	1.71064
CYR18.202523	10.614	6.21667	1.32159	0.0039	1.70734
CYR6.38496	13.9507	8.19422	1.68429	0.0039	1.7025
CYR14.173690	12.1753	7.15542	1.35295	0.0039	1.70155
CYR8.75285	84.3303	49.5665	12.676	0.0039	1.70136
CYR14.147680	26.2973	15.4808	6.46474	0.1093	1.69871
CYR3.16110	14.3786	8.47162	1.79744	0.0039	1.69727
CYR14.128592	31.756	18.7146	4.51704	0.0065	1.69686
CYR9.39425	14.0567	8.30205	1.62663	0.0039	1.69316
CYR5.91990	8.26005	4.87987	3.66718	0.3367	1.69268
CYR13.107924	51.7118	30.5634	6.10904	0.0039	1.69195
CYR12.94408	9.89477	5.85421	1.16908	0.0039	1.6902
CYR7.146144	16.8216	9.95285	1.95221	0.0039	1.69013
CYR2.73851	16.9178	10.0201	2.23055	0.0039	1.68838
CYR10.152813	6.07025	3.59873	1.87691	0.1093	1.68678
CYR7.127867	27.396	16.2571	3.58244	0.0039	1.68518
CYR8.93674	139.095	82.6534	24.7462	0.025	1.68287
CYR9.186821	81.3823	48.3648	10.6286	0.0039	1.68268
CYR4.101942	6.48422	3.85381	2.03771	0.2002	1.68255
CYR10.138628	20.7262	12.3292	2.79607	0.0104	1.68107
CYR18.147870	6.86976	4.08732	0.82607	0.0039	1.68075
CYR4.171503	36.1979	21.5489	6.14338	0.0104	1.67981
CYR10.195153	203.749	121.357	23.4529	0.0039	1.67892
CYR9.30774	35.4567	21.1264	5.85018	0.0163	1.67832
CYR12.51359	81.3038	48.4511	10.3916	0.0039	1.67806
CYR3.151832	30.7029	18.3025	3.63149	0.0039	1.67752
CYR5.148899	9.88516	5.89783	1.42838	0.0104	1.67607
CYR7.84459	50.8293	30.3707	6.2166	0.0039	1.67363
CYR16.136318	1421.96	849.759	154.534	0.0039	1.67337
CYR7.85332	7.22282	4.3204	1.22842	0.0065	1.67179
CYR17.34773	14.143	8.4684	1.52214	0.0039	1.67009
CYR8.146536	74.3469	44.629	7.68592	0.0039	1.66589
CYR1.194063	74.12	44.4979	8.04307	0.0039	1.6657
CYR18.166071	5.83368	3.50832	2.3241	0.3367	1.66281
CYR12.161155	9.02313	5.42812	1.35213	0.0065	1.66229
CYR10.71446	104.952	63.143	14.6944	0.0039	1.66214
CYR7.20093	52.5909	31.6424	6.88236	0.0065	1.66204
CYR12.73460	23.3574	14.0536	2.40159	0.0039	1.66202
CYR9.167253	33.4761	20.1454	3.56815	0.0039	1.66172
CYR14.107700	50.9265	30.6477	7.95047	0.0163	1.66168
CYR4.120641	16.5258	9.94887	1.94203	0.0039	1.66108
CYR11.230832	8.44613	5.08862	3.86819	0.4233	1.65981
CYR15.47071	15.3309	9.24535	1.93313	0.0039	1.65823
CYR10.189430	60.1992	36.3074	12.4867	0.025	1.65804
CYR18.56084	49.2644	29.7245	7.68862	0.0163	1.65737
CYR18.77271	10.1062	6.10574	1.17697	0.0039	1.6552
CYR10.73922	16.8807	10.2078	1.92827	0.0039	1.65371
CYR6.43750	12.4665	7.5407	5.41002	0.3367	1.65323
CYR8.187387	125.026	75.6316	15.542	0.0039	1.6531
CYR11.166681	12.0179	7.27787	1.72864	0.0039	1.6513
CYR11.132501	18.468	11.1939	2.47579	0.0039	1.64983
CYR16.82247	20.145	12.2123	10.4605	0.5218	1.64957
CYR6.52945	13.9132	8.43815	4.08155	0.2002	1.64884
CYR18.119102	10.8399	6.58873	1.75313	0.0104	1.64522
CYR3.133339	55.2148	33.571	6.13215	0.0039	1.64472
CYR12.44686	39.7839	24.1937	5.82176	0.025	1.64439
CYR1.166672	16.6914	10.1651	1.853	0.0039	1.64203
CYR7.53191	14.0078	8.53367	1.83807	0.0039	1.64147
CYR1.127095	39.5918	24.1426	5.79439	0.0039	1.63992
CYR17.238180	68.1028	41.5324	8.0352	0.0039	1.63975
CYR15.179827	114.232	69.7734	18.0037	0.025	1.63718
CYR13.2952	19.639	11.9981	2.77304	0.0104	1.63684
CYR7.9166	14.0816	8.60752	1.64239	0.0039	1.63596
CYR5.103155	53.4153	32.6905	5.74182	0.0039	1.63397
CYR9.53148	50.9501	31.1983	7.55111	0.0163	1.63311
CYR3.167900	68.1917	41.7565	7.6535	0.0039	1.63308
CYR13.217627	9.0029	5.51774	1.49991	0.025	1.63163
CYR12.85215	15.4152	9.45546	2.57969	0.025	1.6303
CYR7.127214	24.7984	15.214	4.21749	0.0104	1.62998
CYR9.135590	24.5634	15.076	3.53609	0.0039	1.62931
CYR13.116202	10.3999	6.3871	1.01326	0.0039	1.62827
CYR7.46567	14.8052	9.11176	1.82902	0.0039	1.62484
CYR2.40826	31.6565	19.4835	3.42356	0.0039	1.62478
CYR18.140494	13.7495	8.46254	1.45121	0.0039	1.62475
CYR12.56150	29.2958	18.0402	4.39563	0.0065	1.62392
CYR11.114865	43.8812	27.0293	8.19038	0.025	1.62347
CYR2.11876	282.698	174.304	35.3904	0.0039	1.62187
CYR14.173029	87.4705	54.0926	14.3685	0.0065	1.61705
CYR2.192125	13.9905	8.6571	1.24786	0.0039	1.61608
CYR18.166603	46.436	28.753	6.44794	0.0104	1.615
CYR9.223950	14.9853	9.30783	1.89569	0.0065	1.60997
CYR14.3073	38.0824	23.6637	12.357	0.2623	1.60932
CYR5.61967	7.09414	4.41464	2.89366	0.3367	1.60696
CYR7.72729	10.5462	6.5734	1.23987	0.0039	1.60437
CYR8.144665	25.9076	16.159	3.63077	0.0039	1.60329
CYR15.196649	27.9606	17.4509	3.20106	0.0039	1.60224
CYR16.46781	14.6674	9.16847	6.17549	0.2623	1.59977
CYR16.81624	15.4355	9.65163	2.47497	0.0163	1.59926
CYR10.188507	31.1689	19.4906	3.86125	0.0039	1.59918
CYR11.48574	13.7613	8.60917	1.69989	0.0039	1.59845
CYR8.90373	42.9988	26.9475	8.09591	0.0163	1.59565
CYR6.95586	28.5763	17.9295	3.60815	0.0065	1.59381
CYR13.220691	8.30674	5.23005	1.33261	0.025	1.58827
CYR12.129410	7.68126	4.83708	2.94608	0.3367	1.588
CYR18.219943	70.9247	44.6654	8.90305	0.0104	1.58791
CYR17.74119	116.877	73.6163	14.4672	0.0039	1.58765
CYR12.214095	54.5699	34.3728	8.97762	0.0163	1.58759
CYR1.135027	37.6073	23.6951	4.92882	0.0104	1.58714
CYR13.77016	65.4554	41.2541	7.41703	0.0039	1.58664
CYR16.19357	6.86895	4.33045	1.07484	0.0104	1.5862
CYR13.145487	14.4861	9.14326	1.47196	0.0039	1.58435
CYR15.136611	73.7312	46.5763	11.8029	0.025	1.58302
CYR8.99276	6.06923	3.83676	1.98298	0.1093	1.58186
CYR7.51092	109.016	69.0847	17.3288	0.0374	1.57801
CYR8.224597	16.4423	10.4253	2.09223	0.0039	1.57716
CYR9.133390	44.6833	28.3367	5.45998	0.0065	1.57687
CYR2.88198	116.236	73.9713	15.5919	0.0039	1.57136
CYR15.139728	9.8335	6.26575	1.02747	0.0039	1.56941
CYR11.57261	9.66827	6.16504	1.07432	0.0039	1.56824
CYR4.234591	29.3912	18.7451	4.07028	0.0104	1.56794
CYR2.186436	9.91697	6.32899	1.09507	0.0039	1.56691
CYR11.197225	33.9211	21.6877	3.45533	0.0039	1.56407
CYR7.36390	70.3937	45.0862	11.8058	0.025	1.56131
CYR12.11877	135.865	87.0298	18.0559	0.0065	1.56113
CYR12.64947	527.183	337.837	56.4492	0.0039	1.56046
CYR11.74015	8.33268	5.35696	1.27803	0.025	1.55549
CYR2.213437	25.8364	16.6285	8.30855	0.1495	1.55375
CYR16.156813	5.40927	3.48265	1.81612	0.0782	1.55321
CYR11.32850	81.0369	52.3732	14.8979	0.0374	1.5473
CYR5.26131	49.4516	32.0374	6.51947	0.0039	1.54356
CYR6.67940	16.5416	10.7209	2.04597	0.0039	1.54292
CYR15.205494	36.8162	23.9065	3.9663	0.0039	1.54
CYR2.95863	9.08491	5.905	4.23205	0.3367	1.53851
CYR3.203724	32.3359	21.0377	3.13062	0.0039	1.53704
CYR17.64113	18.2966	11.9257	2.40736	0.0039	1.53422
CYR5.97387	17.2304	11.2659	2.65321	0.0163	1.52942
CYR17.93099	15.3014	10.0078	2.52892	0.025	1.52895
CYR2.86507	36.7148	24.0799	3.23468	0.0039	1.52471
CYR18.196437	32.8756	21.5677	3.29263	0.0039	1.5243
CYR6.48185	19.2721	12.6447	2.58508	0.0104	1.52413
CYR7.31212	62.2287	41.0578	7.18009	0.0039	1.51564
CYR8.91607	9.147	6.03966	1.1497	0.0065	1.51449
CYR8.81622	13.35	8.82543	2.32487	0.0163	1.51268
CYR10.33643	17.1083	11.313	2.26393	0.0039	1.51226
CYR13.119805	31.4303	20.7965	3.78219	0.0039	1.51133
CYR11.154724	35.0654	23.2153	4.0678	0.0065	1.51045
CYR11.30646	8.7737	5.81852	3.22736	0.3367	1.50789
CYR15.12793	36.7095	24.3791	2.73423	0.0039	1.50577
CYR15.113503	48.9512	32.557	5.72489	0.0065	1.50355
CYR17.127514	10.2787	6.84845	1.76122	0.025	1.50088
CYR2.6549	8.75555	5.85081	4.34254	0.4233	1.49647
CYR17.76090	10.1732	6.80199	4.0426	0.3367	1.49563
CYR2.93623	27.7007	18.5533	3.57441	0.0065	1.49304
CYR18.27086	904.409	607.119	264.414	0.2002	1.48967
CYR13.303	33.8099	22.7648	4.67258	0.0163	1.48518
CYR14.62648	5.54394	3.73811	2.25977	0.1093	1.48309
CYR6.101807	153.466	103.748	18.3919	0.0065	1.47922
CYR6.102122	8.23416	5.56885	1.26434	0.025	1.47861
CYR17.75673	21.8584	14.8285	3.87846	0.0547	1.47408
CYR9.225106	9.91744	6.75311	1.24449	0.0065	1.46857
CYR10.177305	222.453	151.924	55.4418	0.025	1.46424
CYR11.206837	8.72955	5.96323	1.08039	0.0039	1.4639
CYR16.7435	355.751	243.181	44.2566	0.0065	1.46291
CYR18.17403	15.4037	10.5455	1.99868	0.0104	1.4607
CYR3.142570	23.202	15.9496	5.71826	0.2623	1.45471
CYR16.235798	41.3162	28.4109	7.23478	0.0374	1.45423
CYR5.173439	11.2133	7.74303	1.04211	0.0039	1.44818
CYR2.197814	147.694	102.906	16.5561	0.0065	1.43523
CYR18.104190	7.59293	5.33063	1.09258	0.0374	1.4244
CYR17.242690	40.4418	28.4642	4.42129	0.0039	1.42079
CYR16.219302	7.7547	5.46955	1.10802	0.025	1.41779
CYR15.222711	34.2452	24.1651	4.23374	0.0163	1.41714
CYR4.161600	25.5406	18.048	4.32318	0.025	1.41515
CYR16.114403	139.007	98.4005	15.3931	0.0065	1.41266
CYR8.121964	144.903	103.212	16.6992	0.0065	1.40394
CYR15.86230	11.1164	7.9418	1.46403	0.0374	1.39973
CYR1.28508	33.9468	24.2653	4.57638	0.0104	1.39898
CYR7.196218	5.93697	4.29675	2.86631	0.8728	1.38174
CYR7.74123	8.54606	6.18999	1.39102	0.0374	1.38063
CYR1.162171	49.8795	36.129	9.90216	0.0782	1.38059
CYR16.103609	16.6565	12.0834	3.55265	0.1093	1.37846
CYR6.90965	21.5632	15.6648	3.79032	0.1495	1.37654
CYR17.208517	4508.36	3280.59	1335.03	0.2002	1.37425
CYR8.120296	21.0883	15.4254	4.00844	0.1093	1.36712
CYR13.77957	19.8625	14.5517	3.62991	0.1093	1.36496
CYR16.235992	20.7941	15.3131	3.72593	0.1093	1.35793
CYR14.122116	7.75479	5.72601	1.03018	0.0782	1.35431
CYR16.231775	10.6821	7.89085	1.56457	0.0374	1.35373
CYR18.99743	21.4773	15.9829	4.0403	0.1495	1.34377
CYR16.179650	20.0789	15.0018	6.27555	0.2623	1.33843
CYR16.194636	12.3837	9.39854	5.04649	0.7488	1.31762
CYR4.16568	7.94339	6.03677	1.21707	0.025	1.31583
CYR3.49827	21.7648	16.5658	3.79768	0.0782	1.31384
CYR16.219921	41.4707	31.7133	9.02174	0.1093	1.30768
CYR4.191039	7.34116	5.63682	2.88092	0.7488	1.30236
CYR14.14584	20.794	15.9697	4.06346	0.2002	1.30209
CYR5.175347	22.5092	17.3065	4.06611	0.1495	1.30062
CYR5.97960	8.23091	6.33888	1.37154	0.1093	1.29848
CYR11.175913	7.46668	5.7608	0.88309	0.025	1.29612
CYR6.243452	7.73746	6.00368	1.12559	0.1093	1.28879
CYR18.57961	89.0991	69.7459	9.03601	0.0163	1.27748
CYR16.86706	81.6834	64.0249	22.7981	0.8728	1.27581
CYR3.53052	7.63854	5.9958	1.44662	0.1093	1.27398
CYR15.226821	20.6273	16.1972	3.902	0.2002	1.27351
CYR3.34014	71.5957	56.9051	10.7752	0.1495	1.25816
CYR8.9683	8.25174	6.64696	1.73355	0.2002	1.24143
CYR3.109561	68.2043	55.052	5.97613	0.025	1.23891
CYR13.220779	69.6749	56.4723	5.6914	0.0104	1.23379
CYR18.189371	85.3827	69.261	18.5871	0.4233	1.23277
CYR18.94710	7.84115	6.41063	1.45528	0.1093	1.22315
CYR8.22255	7.74499	6.36433	3.16943	0.8728	1.21694
CYR8.85373	7.18664	5.94101	0.9953	0.0547	1.20967
CYR18.73168	27.8992	23.5579	7.02973	0.5218	1.18428
CYR15.73526	7.94007	6.72097	1.52147	0.1495	1.18139
CYR7.205810	9.38902	7.95589	2.20784	0.0547	1.18013
CYR10.100938	75.8268	64.4298	15.727	0.4233	1.17689
CYR18.161471	16.4888	14.2285	3.66293	0.2623	1.15886
CYR9.182210	8.07802	6.97495	1.67528	0.2623	1.15815
CYR4.1545	8.98869	7.77128	2.04759	0.1495	1.15666
CYR14.145295	39162.4	33989.6	4744.2	0.0547	1.15219
CYR15.7810	1115.39	981.451	343.09	0.3367	1.13647
CYR9.168896	13.8414	12.1876	3.04689	0.0547	1.1357
CYR8.10252	29822.4	26365.1	4179.89	0.2623	1.13113
CYR11.85887	110.875	98.8961	31.0817	0.631	1.12113
CYR11.79413	87.1245	78.0118	26.4727	0.4233	1.11681
CYR18.3938	2296.72	2094.67	718.02	1	1.09646
CYR10.183442	230.338	211.251	26.9577	0.2623	1.09035
CYR4.62546	179.511	164.971	88.5003	0.7488	1.08814
CYR9.99726	13.7234	12.9007	2.62232	0.1093	1.06377
CYR14.166501	43.0318	40.5735	11.7052	0.8728	1.06059
CYR10.48325	17.742	16.7451	3.40327	0.2002	1.05953
CYR6.223280	6.92421	6.54792	2.30882	0.1495	1.05747
CYR7.153677	36.9031	34.9634	11.3205	0.5218	1.05548
CYR3.68687	8.07475	7.65151	1.70046	0.1093	1.05531
CYR10.130544	142.548	135.567	43.5061	0.631	1.0515
CYR4.185988	22.1841	21.1214	4.84172	0.2002	1.05031
CYR16.77333	197.118	189.467	61.813	0.631	1.04038
CYR10.159083	18.145	17.4717	3.9283	0.1495	1.03854
CYR18.217515	4.3913	4.23221	1.29969	0.2623	1.03759
CYR11.85662	16.0585	15.4857	2.99295	0.631	1.03698
CYR4.137137	27042.2	26085.7	4397.17	0.3367	1.03667
CYR6.178419	186.969	180.669	57.9857	0.631	1.03487
CYR6.207431	6.2962	6.10765	1.68885	0.2623	1.03087
CYR8.97508	132.343	128.735	38.8028	0.7488	1.02803
CYR6.173219	13.5047	13.1506	3.84359	0.8728	1.02693
CYR15.106753	28.5151	27.7785	9.28888	1	1.02652
CYR18.173433	135.106	132.565	42.5765	1	1.01916
CYR10.197043	5.25436	5.18428	1.40415	0.2002	1.01352
CYR6.57991	19.7723	19.5671	3.02671	0.7488	1.01049
CYR10.174810	6.36163	6.29576	1.70506	0.1093	1.01046
CYR7.189876	4.95591	4.90991	1.2778	0.2002	1.00937
CYR4.96414	4.95256	4.96653	0.97924	0.1495	0.997187
CYR7.142221	8.92791	8.99922	2.20416	0.3367	0.992076
CYR15.82733	114.397	116.139	35.3498	0.8728	0.985
CYR1.67405	5.63837	5.76673	1.19033	0.631	0.977741
CYR2.49119	96.3989	98.7974	30.3327	0.8728	0.975723
CYR7.77284	18.4207	18.9766	3.56279	0.3367	0.970709
CYR17.218571	15.4554	15.9426	2.81251	0.4233	0.96944
CYR2.7984	5.22405	5.41912	1.1977	0.631	0.964003
CYR14.141790	10.2283	10.6229	6.38994	0.8728	0.962859
CYR1.129155	16.0396	16.6854	4.77996	0.4233	0.961291
CYR4.108013	17838.5	18580.5	3709.16	0.631	0.960068
CYR15.86397	7.58735	8.01144	3.12858	0.5218	0.947064
CYR16.71013	9.16408	9.69769	5.10007	0.631	0.944976
CYR9.247676	5.00173	5.2956	0.91948	0.4233	0.944507
CYR10.37546	26.0688	27.6331	6.774	1	0.943391
CYR18.43454	5.22287	5.59159	1.45503	0.7488	0.934058
CYR13.21556	7.26813	7.78218	3.12398	0.631	0.933945
CYR15.51015	16.2174	17.3781	4.14315	1	0.933212
CYR1.192175	15.8808	17.1471	3.70416	0.8728	0.926148
CYR5.45964	7.47276	8.16901	1.6246	0.631	0.914769
CYR15.131499	5.55947	6.0787	1.42196	0.631	0.914582
CYR5.174193	9.22195	10.2184	4.26626	0.7488	0.902487
CYR16.35532	9.01296	10.0304	5.90086	0.5218	0.898563
CYR7.78518	16.5065	18.4359	4.63658	0.631	0.895345
CYR6.213641	9.14811	10.2286	2.18886	0.8728	0.894368
CYR17.45035	30.2226	33.9898	7.4104	0.8728	0.889167
CYR4.226576	7.00657	7.89382	3.17097	0.8728	0.887602
CYR1.32957	8.73243	9.91342	3.81338	0.7488	0.88087
CYR1.139637	6.67132	7.57618	1.75435	0.4233	0.880565
CYR9.123066	9.95063	11.4257	4.52286	0.631	0.8709
CYR18.179117	13.1628	15.1198	2.79957	0.4233	0.870565
CYR11.226945	8.76334	10.1096	5.49145	0.3367	0.866833
CYR14.170509	45.2811	52.2448	11.1951	0.7488	0.86671
CYR12.194215	7.08829	8.19809	3.04822	0.7488	0.864627
CYR2.241782	9.85778	11.4362	2.40653	0.7488	0.861978
CYR1.144050	32.812	38.1998	8.26526	0.631	0.858957
CYR8.225649	7.23284	8.4279	3.15535	0.8728	0.858202
CYR16.227008	44.8413	52.627	10.6915	0.7488	0.852059
CYR17.87098	6.71395	7.95124	2.90158	0.7488	0.84439
CYR17.17507	45.9907	54.75	12.0924	0.8728	0.840013
CYR2.112790	45.5044	54.1892	12.2492	0.7488	0.839732
CYR4.150809	45.5686	54.3313	11.779	0.7488	0.838717
CYR11.204746	7.43193	8.87918	2.78275	0.631	0.837006
CYR2.134569	6.82485	8.27888	2.8563	0.8728	0.824369
CYR17.177103	10.8294	13.5617	9.63645	0.631	0.798529
CYR15.43105	8.98807	11.2887	2.77293	0.5218	0.7962
CYR5.37495	6.60371	8.34402	3.1362	0.8728	0.79143
CYR8.165335	11.6815	14.7827	10.7712	0.5218	0.79021
CYR5.226518	3.70006	4.73738	1.51218	0.5218	0.781035
CYR16.113166	39.4742	50.6599	21.4189	0.631	0.779201
CYR10.58481	10.9976	14.3874	10.6654	0.631	0.76439
CYR10.59712	884.897	1167.2	246.039	0.1495	0.758137
CYR9.203443	11.3246	14.953	10.436	0.631	0.757346
CYR6.182737	4.44368	5.92781	0.98663	0.0547	0.749633
CYR11.83815	10.7186	14.6859	10.2309	0.8728	0.72986
CYR1.86626	11.7398	16.2835	11.8274	0.7488	0.720959
CYR3.86375	13.5744	18.92	14.994	0.5218	0.717459
CYR6.113664	6.49108	9.10921	2.72175	0.4233	0.712584
CYR1.138348	10.1262	14.3384	4.27072	0.4233	0.706228
CYR1.78854	32.0223	45.3531	18.0411	0.631	0.706066
CYR9.199406	9.30111	13.2317	3.03166	0.1093	0.702939
CYR9.20951	23.257	33.1011	10.4406	0.3367	0.702605
CYR8.12970	22.3846	32.7898	10.9017	0.2002	0.68267
CYR9.104461	8.75979	12.8578	4.25401	0.2623	0.68128
CYR6.17322	554.312	816.237	153.355	0.0547	0.679107
CYR1.116343	21.7381	32.3452	10.0951	0.1093	0.672066
CYR14.220813	8.52479	12.8333	2.89829	0.0547	0.664271
CYR17.68260	1012.22	1532.7	458.081	0.2002	0.660417
CYR15.52562	533.838	818.038	170.614	0.0374	0.652583
CYR16.144968	23.5629	36.7376	7.14556	0.0782	0.641384
CYR7.85584	279.319	438.153	89.2501	0.0374	0.637493
CYR18.200524	5.43899	8.59818	3.01265	0.1495	0.632575
CYR12.127484	1089.56	1731.84	329.059	0.0374	0.629134
CYR1.115363	225.823	366.079	72.0171	0.025	0.616868
CYR1.159945	5.13198	8.48939	2.56736	0.0374	0.604517
CYR17.68355	18.4622	31.8655	12.0113	0.1093	0.579381
CYR7.90753	18.42	31.9433	11.4859	0.1093	0.576644
CYR9.98860	11.8333	20.7301	5.95379	0.025	0.570829
CYR6.60596	18.4718	33.4295	7.14775	0.0163	0.552559
CYR2.70503	22.8687	41.4586	17.3239	0.1093	0.551603
CYR9.183427	23.367	42.4919	14.0165	0.0163	0.549917
CYR18.53773	10.0371	18.2883	5.92423	0.025	0.548822
CYR3.162958	10.3708	18.9156	6.04975	0.0163	0.548269
CYR7.184665	1340.66	2465.25	433.683	0.0163	0.543824
CYR12.212425	17.7306	32.9249	12.0314	0.025	0.538517
CYR15.144589	9.63873	18.2995	6.09429	0.0104	0.52672
CYR8.163739	9.89854	18.8249	6.39329	0.0163	0.525821
CYR1.20113	37.3729	72.7582	12.67	0.0104	0.513659
CYR1.108574	19.4892	40.7107	7.08272	0.0065	0.478725
CYR5.224964	9.13265	19.0949	3.59236	0.0104	0.478278
CYR15.105879	43.3161	91.4702	18.6191	0.0065	0.473554
CYR9.204361	19.3681	41.5805	6.40817	0.0065	0.465797
CYR2.168654	22.1127	47.8203	13.4057	0.0547	0.462413
CYR7.162739	42.0616	91.131	20.2204	0.0065	0.461551
CYR9.146951	8.30925	18.1727	3.57152	0.0065	0.457239
CYR7.105450	139.136	313.614	91.2844	0.0782	0.443652
CYR2.70670	9.71147	22.0662	4.74429	0.0065	0.440106
CYR4.231210	8.55775	19.5728	7.06152	0.1093	0.437227
CYR16.196897	13.675	32.5016	4.84857	0.0039	0.420747
CYR6.72172	18.242	43.8334	13.2981	0.0547	0.416167
CYR2.136632	7.06418	17.1511	6.4966	0.0547	0.41188
CYR6.202432	3.06533	7.87262	2.29488	0.0374	0.389366
CYR3.52058	27.9628	74.697	12.4193	0.0065	0.37435
CYR13.216490	34.5513	93.2154	13.7495	0.0039	0.370661
CYR5.99463	2.90044	8.21651	2.82994	0.0374	0.353001
CYR18.34283	40.2049	114.434	17.1883	0.0039	0.351339
CYR1.94526	3.56289	10.3468	3.64691	0.0547	0.344348
CYR8.32638	4131.01	12372.8	2282.96	0.0039	0.333878
CYR5.134573	155.851	467.193	66.6491	0.0039	0.333591
CYR4.104021	11.2092	34.0164	12.6411	0.0547	0.329523
CYR4.68817	3.24714	9.98219	3.09122	0.0104	0.325293
CYR16.7744	57.0429	185.142	30.5979	0.0039	0.308103
CYR16.97308	1788.56	5847.02	1646.72	0.0163	0.305892
CYR14.68841	61.4686	209.363	35.3339	0.0039	0.293598
CYR9.14019	50.794	174.521	25.8245	0.0039	0.291048
CYR9.14987	249.421	868.883	206.939	0.0163	0.28706
CYR6.79708	28.1797	100.351	17.3763	0.0039	0.280813
CYR7.51192	52.6182	187.641	27.3375	0.0039	0.28042
CYR1.189622	8.67856	32.8133	12.5168	0.025	0.264483
CYR1.153062	3.7366	15.339	5.95928	0.0104	0.243602
CYR9.238942	57.1898	284.81	54.7155	0.0039	0.2008
CYR9.60370	2.76867	13.8328	2.41314	0.0039	0.200153
CYR6.209756	2.6084	13.4491	2.42053	0.0039	0.193945
CYR4.123747	2.64603	13.6919	2.61935	0.0039	0.193255
CYR14.115604	2.54153	13.2389	2.0437	0.0039	0.191974
CYR5.17345	33.9669	180.082	31.3355	0.0039	0.188619
CYR1.24550	2.62816	14.3234	2.43057	0.0039	0.183487
CYR8.114315	759.248	4276.66	799.722	0.0065	0.177533
CYR6.205834	18.3603	103.939	18.462	0.0039	0.176645
CYR2.87548	2.54125	14.5158	2.60306	0.0039	0.175067
CYR5.130013	2.40097	14.6419	2.81937	0.0039	0.163979
CYR1.168496	67.3184	446.135	74.7993	0.0039	0.150892
CYR3.134940	67.6069	448.995	74.5951	0.0039	0.150574
CYR1.115972	3.10674	21.8408	8.98108	0.0039	0.142245
CYR8.230808	22.4978	236.404	31.5959	0.0039	0.0951669
CYR9.171278	22.2161	236.211	30.4363	0.0039	0.0940523
CYR2.217477	22.2322	236.542	31.3671	0.0039	0.0939883
CYR1.82024	22.2782	238.216	31.1437	0.0039	0.0935209
CYR16.204734	21.9581	236.296	29.9258	0.0039	0.0929262
CYR5.53392	20.7285	234.621	30.859	0.0039	0.0883489
CYR4.124230	4.71814	64.4398	13.596	0.0039	0.0732178
CYR2.23342	4.19847	67.5108	12.3076	0.0039	0.0621896
CYR3.116449	4.31058	69.8985	12.5822	0.0039	0.0616691
CYR5.80413	6.59752	133.581	19.1505	0.0039	0.0493896
CYR1.105062	1.9291	47.4813	9.45747	0.0039	0.0406286
CYR2.206589	0.53271	50.0149	50.5476	0.902	0.010651

## Sheet: fungi-contig
a	3-nop	3-nop	3-nop	3-nop	3-nop	3-nop	con	con	con	con	con	con
CYR10.3979	66.059	68.7169	64.299	66.838	43.4464	41.9099	179.827	52.3641	56.5054	53.9766	55.8018	69.5556
CYR10.6329	352.257	353.481	499.273	346.603	250.628	304.268	133.236	120.235	217.078	225.357	163.198	327.099
CYR10.19612	106.154	64.5176	148.456	71.7147	62.0763	123.313	32.5525	19.6652	26.0583	28.6116	23.9337	43.3917
CYR10.31422	21.9976	18.6388	18.92	11.8682	7.95213	15.1536	43.2651	11.3101	15.2173	12.7576	9.39168	21.8235
CYR10.38018	71.9879	47.0755	71.5179	38.3117	38.2458	70.513	34.4091	42.5389	42.5464	31.6935	21.7627	52.7417
CYR10.42190	61.2842	99.9173	54.702	70.678	21.1093	54.5608	193.894	109.797	88.7064	32.3175	25.7507	88.5985
CYR10.52626	71.077	40.5271	84.8499	27.5694	22.4939	85.0892	29.0204	15.4259	19.4689	12.1078	6.38594	21.8937
CYR10.75348	554.228	391.063	657.67	220.566	198.679	499.882	240.999	150.021	164.763	164.943	107.732	306.736
CYR10.75647	139.951	115.973	193.538	90.7859	81.6449	145.408	37.1804	36.3332	34.9878	33.3005	24.9278	58.6032
CYR10.95510	316.582	468.137	266.687	332.967	118.049	167.367	1308.84	719.394	665.514	533.562	419.979	747.711
CYR10.95990	660.169	554.634	762.468	331.274	278.502	594.089	200.214	205.436	193.264	264.492	189.748	475.072
CYR10.98520	125.379	93.2128	158.15	108.706	104.739	141.143	41.0614	32.3788	31.611	39.0647	32.9385	49.8254
CYR10.109341	71.0363	63.9259	69.472	31.1509	25.959	51.9354	20.8895	29.6355	25.1299	29.0296	21.3706	48.4108
CYR10.121184	17.3689	29.9112	18.4034	22.2139	9.49477	10.2139	56.9985	35.4908	29.4264	10.3131	11.6797	32.0954
CYR10.121305	25.9391	5.196	27.106	9.22758	15.8586	28.2744	1.91755	0.313931	1.58793	1.57305	0.637221	1.14695
CYR10.135299	56.2947	46.606	52.0051	34.5768	32.7549	55.4475	27.001	13.9135	16.3726	21.3978	15.886	31.5437
CYR10.136436	52.7402	39.1284	54.4101	34.3824	27.4117	31.7058	149.214	39.0069	40.4975	33.5068	31.5987	48.2689
CYR10.151473	184.505	438.629	138.368	1097.04	54.1231	54.6009	196.406	83.333	100.524	17.2514	69.7917	289.05
CYR10.154092	25.9572	17.9149	22.9182	30.0897	18.0154	24.0921	1.69059	2.0239	2.44997	2.00599	2.13307	4.38784
CYR10.175522	294.854	223.043	290.598	139.401	119.465	258.796	105.053	97.4811	90.8133	123.806	87.4667	196.883
CYR10.193389	42.6509	11.3171	79.1585	12.7804	42.0606	95.7551	7.94999	3.21184	3.61026	4.05729	2.49272	5.32487
CYR10.201780	88.8094	78.0236	91.1272	58.592	47.1408	58.9405	27.084	43.9852	50.4329	38.7458	29.6487	57.3065
CYR11.3328	180.813	198.231	226.646	140.959	119.675	141.926	85.0923	92.3338	69.6163	106.78	88.0567	135.015
CYR11.6491	25.678	31.6029	32.1224	27.0207	14.0663	30.6646	18.1422	13.6441	13.3022	16.4442	11.2334	23.1077
CYR11.6594	16.4455	24.3876	15.7767	17.9517	6.1562	7.76393	35.9036	28.1143	20.3823	7.85948	6.75345	22.7485
CYR11.14517	47.8569	40.9466	52.2706	34.9397	28.6195	33.225	158.762	38.1917	38.9837	36.8872	31.2795	54.2304
CYR11.26957	76.7678	44.4069	90.4354	26.4856	27.4739	91.1603	32.9331	15.0965	18.1813	14.1836	7.25037	24.6228
CYR11.29016	22.9834	4.38469	27.8234	8.51212	14.814	30.9741	3.27225	0.18544	1.25066	1.99115	0.846916	3.29073
CYR11.44427	142.859	119.769	144.854	78.682	63.286	124.512	45.6543	51.4989	45.8636	57.3886	45.1596	98.6513
CYR11.50431	43.7536	22.4615	43.0645	24.8108	20.1332	37.8389	18.5575	19.2558	15.3676	11.4406	9.77139	23.1153
CYR11.81363	69.3486	64.5815	74.182	32.2395	23.8212	52.3611	20.4661	27.6598	22.4416	26.6477	20.5263	51.6671
CYR11.87296	1754.51	728.395	3121.84	569.615	1659.69	2059.27	775.012	544.85	449.717	389.801	325.537	584.366
CYR11.102414	12.6816	13.7861	10.2449	9.9573	3.89719	6.29657	47.0756	15.5312	18.3053	6.58426	5.5858	20.9343
CYR11.108194	21.6395	28.1673	19.3277	24.4358	7.6246	12.4224	52.6287	32.5351	32.4023	8.92968	12.7461	32.0263
CYR11.108797	307.988	345.381	462.026	235.587	322.973	79.9372	350.651	418.512	357.191	366.377	284.979	400.972
CYR11.108913	103.826	78.2435	87.1953	63.2503	49.2667	61.8837	33.6074	49.9921	49.935	41.1282	31.9813	57.6256
CYR11.137886	44.15	68.9714	49.1472	40.6916	21.473	41.3725	82.7649	71.5599	63.1438	19.1966	15.3991	54.2189
CYR11.139447	100.42	59.6578	138.652	56.4734	54.2691	128.638	28.9234	14.6296	21.9854	22.5382	19.6893	36.3521
CYR11.141769	18.7895	13.5586	21.3458	10.2552	10.433	16.1889	5.76186	5.47362	4.1436	7.43654	5.21509	10.1447
CYR11.145999	10.5346	17.616	14.2805	13.1244	3.5557	11.5648	22.5431	21.2642	21.285	5.99974	3.38682	14.2578
CYR11.149765	74.7656	79.8757	80.9402	51.03	28.4899	71.7844	36.968	25.6073	34.0284	35.1852	25.1631	63.881
CYR11.164114	30.5805	13.8972	28.2422	24.6623	15.2633	21.9089	1.67957	2.16539	2.60786	3.65368	1.25581	4.1978
CYR11.173333	75.2768	77.6326	78.6855	76.9463	55.4324	54.5704	201.55	63.552	55.69	63.4361	65.7713	75.1126
CYR11.176494	35.7507	42.8521	32.8329	40.9286	17.0965	32.1778	55.3501	41.9592	38.3624	13.8545	13.0453	42.4113
CYR11.179032	438.323	402.606	246.319	235.956	71.1429	144.863	464.79	175.181	162.279	82.3978	47.2999	109.435
CYR11.203810	35.7984	41.9281	45.0269	19.6833	22.9081	54.0046	16.1006	10.6035	11.1108	14.2801	7.11357	13.1322
CYR11.223773	178.186	429.426	132.282	1076.17	51.9369	59.1533	188.636	81.9301	97.2098	16.2911	69.3419	285.179
CYR12.4676	95.7628	80.7201	93.2168	59.1716	53.3733	66.2071	36.0473	48.707	47.7883	42.1971	30.82	59.6691
CYR12.13056	139.196	127.838	137.283	82.814	60.535	131.901	50.9222	52.1902	43.5332	60.9754	43.7854	91.7966
CYR12.20382	58.8254	28.4441	115.627	23.368	61.5906	81.7589	24.8243	15.2403	12.4713	14.4878	10.0848	21.254
CYR12.22897	68.4281	63.4342	74.9179	33.4955	23.2715	53.0422	19.1958	23.3964	23.4935	27.8386	19.3127	46.9997
CYR12.52908	79.0702	75.0617	87.5578	72.2554	55.312	51.0239	195.986	65.2262	56.9673	61.1584	68.8401	75.1192
CYR12.62470	311.612	344.897	456.727	231.314	329.121	86.1776	353.763	399.575	339.576	353.328	300.289	389.316
CYR12.69054	335.256	509.928	285.429	333.046	126.186	154.48	1400.39	762.046	687.395	557.558	444.304	786.164
CYR12.71079	75.7207	78.2412	85.122	53.2155	30.2031	78.6036	39.2677	28.6319	36.8609	34.0411	25.4389	64.2221
CYR12.76393	52.398	35.8268	46.8489	33.1742	27.0345	32.9151	153.096	42.1889	37.8422	34.7759	34.3119	51.0083
CYR12.76539	66.7964	42.9944	89.5526	39.2875	41.8701	73.9037	18.1296	11.9504	14.6971	16.4045	11.9859	25.9764
CYR12.98853	103.795	71.0702	176.065	72.4872	64.3303	125.539	28.8632	19.0257	28.754	27.1238	23.1224	48.7322
CYR12.101382	232.498	351.125	235.327	259.821	108.552	152.705	217.815	218.665	174.062	85.8766	72.5355	194.683
CYR12.124873	14.5429	27.8028	20.56	22.5589	9.24305	11.7513	37.5545	31.6441	28.961	9.40731	10.8808	26.8948
CYR12.142649	182.238	151.991	193.125	102.514	92.574	163.693	66.1664	67.0255	64.0482	75.7405	69.1944	123.255
CYR12.179209	16.1903	14.3147	24.9046	14.3213	9.44596	12.7021	5.13601	6.05404	3.18986	6.36506	5.18423	6.51703
CYR13.41502	43.7298	44.9316	52.0381	27.2584	26.9223	67.2309	18.9057	7.77383	12.7432	14.6074	6.57475	13.1865
CYR13.46084	137.383	83.8298	96.8192	71.5218	53.6412	177.691	238.919	99.0197	61.3878	51.7831	37.6177	129.343
CYR13.51991	18.8063	18.9098	18.6782	16.0607	8.01539	18.9077	50.6817	12.7459	13.9899	12.3441	10.3487	20.3486
CYR13.53760	325.834	356.004	453.955	241.988	316.984	83.1912	365.428	414.365	355.249	366.996	299.184	395.019
CYR13.57300	86.0202	83.2263	96.1098	61.5619	52.3993	68.6306	35.7537	49.1686	50.2675	39.6378	32.733	61.1011
CYR13.93534	92.8604	90.5919	106.432	64.8203	52.1448	78.6519	27.6516	37.2646	24.9462	43.0359	36.0551	58.4348
CYR13.94734	206.8	187.024	225.85	125.198	106.05	175.163	64.4905	66.3836	63.3441	86.5363	70.3198	142.034
CYR13.99583	48.4087	39.6276	50.2597	37.7444	26.9472	31.5148	155.58	43.319	41.5086	34.6691	34.0186	51.7422
CYR13.104091	38.3492	23.5518	23.7921	32.8374	22.7635	26.633	1.9013	2.33453	2.62412	2.33957	2.21137	3.41167
CYR13.113040	54.6747	39.553	88.5676	40.9249	39.7392	74.9841	13.2213	11.5402	8.8065	15.7637	13.0553	20.4455
CYR13.113103	83.3344	24.0734	173.122	26.7175	92.3358	85.6975	11.2584	5.13451	4.58756	8.1048	5.07742	10.0322
CYR13.118404	133.625	104.359	134.96	85.0867	77.3374	128.97	41.1792	48.5697	48.2113	60.2282	51.1137	88.6075
CYR13.121070	155.8	82.8711	178.003	54.0035	68.9556	184.287	45.4113	27.033	22.496	23.4136	17.1285	40.0672
CYR13.123964	29.8606	35.6993	24.3265	21.4716	7.35905	14.2032	28.7786	17.9893	14.624	8.50818	6.03146	15.5926
CYR13.160938	17.7775	25.5043	17.2982	20.5146	9.70607	12.1201	46.7273	33.392	28.8278	9.48726	9.52055	29.1069
CYR13.171427	53.195	31.0326	49.5208	32.4716	32.8805	58.2616	23.5027	14.1127	15.0636	18.0823	13.8416	26.7399
CYR13.174184	30.6949	6.70762	29.6696	9.0111	18.4223	25.0338	2.56709	0.630404	2.12582	1.4666	1.03968	1.80964
CYR13.192144	82.5503	80.8139	92.1291	52.056	31.1617	77.2916	38.7278	31.2062	34.0751	37.8156	25.2805	60.1469
CYR13.199808	73.8953	72.7886	80.171	69.5409	56.6239	41.8059	199.397	56.918	54.0996	58.9185	58.1911	75.5784
CYR13.205537	288.318	321.398	311.494	178.286	141.257	241.511	217.554	171.146	184.479	136.082	103.263	222.243
CYR13.216091	63.2748	173.956	69.3346	71.3721	29.4444	73.1905	31.0454	72.6173	67.4856	27.1505	18.9569	102.86
CYR13.221047	74.8728	97.354	31.5342	65.3841	15.1945	16.8222	42.1679	38.4918	40.0669	30.9203	25.0597	42.247
CYR14.7736	73.9672	64.7593	71.9896	31.1575	24.315	50.5839	22.1646	28.6017	21.0435	30.0781	21.2169	44.8384
CYR14.8211	41.5098	24.0316	33.1476	34.1735	21.6029	28.311	2.3467	3.30054	2.47331	3.9377	1.67487	4.26559
CYR14.18094	124.441	95.2491	132.041	65.2726	53.2937	106.124	47.8239	39.7964	36.1148	49.3957	31.6817	74.3178
CYR14.29683	72.9544	109.117	40.8398	75.701	17.4262	17.9083	69.01	54.6799	55.8398	40.3075	34.6548	60.9641
CYR14.62168	46.1417	75.8392	13.0526	51.5515	4.63158	4.70523	41.9042	37.2863	25.5376	23.8207	20.8877	34.3179
CYR14.69176	1464.54	1785.06	2170.92	1129.72	1513.89	342.482	1749.26	2073.62	1832.86	1771.62	1411.06	2019.3
CYR14.72967	126.419	199.302	146.231	100.75	59.013	129.907	182.683	113.166	117.403	90.5057	53.0976	148.205
CYR14.95163	52.196	44.1182	54.2964	35.9249	26.7047	37.5729	148.683	41.911	37.8477	34.8826	33.5239	53.2403
CYR14.113003	12.3723	21.5115	9.30913	14.6971	6.95364	9.82737	60.704	19.2368	15.1547	7.53247	7.17533	17.6777
CYR14.115503	58.794	63.6556	66.6236	41.6731	34.324	56.6033	25.7735	28.3478	21.6437	30.0555	22.9349	41.8741
CYR14.125202	56.5377	198.391	38.5796	88.0546	17.4225	35.0498	14.7985	52.7477	51.9022	16.756	17.0853	66.6087
CYR14.153642	172.813	458.356	132.217	1169.88	51.6836	53.8138	186.309	85.7612	94.5502	16.4216	72.844	286.654
CYR14.161166	20.9206	29.0266	28.9318	15.1256	9.19395	24.2741	12.4975	11.9692	10.7632	11.8632	7.19511	17.1073
CYR14.180316	106.52	80.0754	90.0424	58.4145	54.2346	65.2935	34.9425	55.1465	46.812	41.523	33.0353	61.6256
CYR14.181785	72.4192	219.297	49.23	79.1826	55.4654	70.2611	40.3707	62.7338	66.1315	27.5723	25.1541	107.049
CYR14.185825	19.6496	24.9786	18.8505	19.1414	6.83244	10.628	41.1877	26.1292	31.6444	7.84364	10.2653	26.7472
CYR14.197092	113.45	114.059	144.809	73.5219	57.4309	88.5361	42.8462	48.0766	39.848	54.4609	42.961	87.3591
CYR14.198843	89.2739	95.9717	138.367	93.3389	75.4125	97.8421	36.9577	26.471	24.6539	41.8225	25.5223	46.5795
CYR14.211786	44.0465	28.5194	32.5237	21.8548	18.8105	39.108	10.3144	7.41786	12.6087	8.02964	4.31507	13.2201
CYR14.213324	31.8222	38.1815	21.6045	21.3764	7.21137	12.4971	22.5193	16.9221	13.4268	8.78811	6.65084	17.8374
CYR14.218691	87.0944	84.3664	97.4372	80.9351	62.0674	56.3625	234.997	70.3861	68.4782	72.8049	72.6578	86.7663
CYR15.1434	332.511	258.422	325.97	169.093	134.168	254.519	96.9177	119.667	95.3063	134.25	92.6073	210.234
CYR15.12634	16.3873	11.9462	15.9058	9.4702	9.21021	16.2617	6.03026	5.22657	5.14055	6.26673	4.24357	10.9116
CYR15.19548	76.0778	56.8944	72.7754	51.1323	30.2871	60.6726	193.368	53.182	49.1812	44.7129	36.1077	67.6629
CYR15.28167	5711.9	3728.46	6786.98	2945.03	2758.9	5906.06	2071.44	1313.28	1360.08	1624.86	1199.64	2705.69
CYR15.28624	48.4042	56.1663	63.0992	36.5311	36.5117	8.61085	89.4858	68.7509	61.0472	38.6521	25.7278	47.6802
CYR15.50408	333.419	261.45	340.72	159.595	135.546	251.178	117.042	112.858	104.334	131.128	99.9762	214.968
CYR15.72949	281.9	301.828	331.488	195.675	176.303	238.722	127.181	133.897	115.91	148.155	126.224	206.976
CYR15.97973	45.3807	82.9385	45.178	51.7178	18.18	41.4963	137.061	83.3718	76.3193	23.5397	20.5156	72.4898
CYR15.104821	96.4014	26.7858	214.608	34.6878	114.36	112.06	15.0193	6.98144	5.1823	8.20348	4.94648	11.1377
CYR15.108674	72.8774	66.0568	75.6539	29.1411	22.9661	56.2775	24.5593	26.6199	24.5455	29.6995	19.7876	50.3646
CYR15.113971	199.973	148.216	248.777	87.0677	119.642	110.131	21.5614	48.2942	40.1739	27.0512	28.8624	66.3249
CYR15.129459	4.22554	2.87277	83.8377	1.99178	1.68221	4.15679	3.18053	4.55612	1.60955	101.476	0.132115	18.3443
CYR15.135254	94.0415	77.256	88.4257	60.0361	50.346	61.8884	30.6079	52.8068	47.7187	40.1889	31.8761	55.483
CYR15.150554	194.259	76.2458	337.612	72.8364	182.286	335.622	62.8082	34.7963	43.5511	31.9744	23.4807	51.2635
CYR15.162131	350.185	368.661	513.153	351.474	252.848	295.524	133.056	112.675	208.542	227.763	163.556	329.354
CYR15.176562	156.785	396.634	148.491	1042.69	50.2522	50.1581	166.042	80.7118	89.2011	15.1021	68.999	256.391
CYR15.188673	21.8267	2.97683	28.5127	7.4772	15.1601	25.7705	2.13613	0.786859	1.06136	1.12651	0.798587	1.47846
CYR15.204554	18.3737	25.0074	21.7312	20.0564	8.21649	11.3134	49.3197	33.4346	28.5701	10.1351	11.2533	32.23
CYR15.208638	1334.31	1251.8	1539.96	915.307	840.162	1180.47	526.336	528.7	474.424	645.258	582.953	940.84
CYR15.211789	78.8028	76.6801	77.8455	71.7221	52.3996	49.7572	189.271	61.0587	59.0601	60.5501	63.9465	76.6948
CYR15.215713	34.2475	36.5883	23.0936	23.9746	7.60747	15.8373	28.7666	24.5567	16.6374	7.82602	8.27913	22.8245
CYR15.226242	34.183	23.039	27.2907	29.9261	22.6503	23.2975	3.79896	2.33229	2.79638	2.89384	0.789017	4.21993
CYR15.231617	42.1174	41.0258	51.8921	36.7347	26.0549	32.8812	154.985	41.5581	42.4667	34.5563	34.5799	56.3802
CYR16.17962	46.7828	59.7924	82.3262	132.055	47.1897	50.6477	108.52	55.6329	60.3476	76.1663	54.784	87.7183
CYR16.38177	16.8771	23.2653	17.4964	21.0971	7.3691	10.4229	44.0744	23.6148	21.1524	8.7162	7.20875	20.9914
CYR16.47297	35.7662	36.7297	23.9383	24.3633	6.73305	14.001	25.2514	23.8646	19.221	7.93619	5.05384	17.8498
CYR16.49963	51.5292	43.0462	55.7475	35.7467	33.4233	57.3678	29.6833	18.6042	18.3439	21.8843	16.0659	28.7327
CYR16.52793	347.339	242.451	368.945	141.591	150.002	228.917	41.2371	54.8894	57.4092	85.0965	47.1429	118.577
CYR16.67313	17.6659	22.8607	18.857	20.9135	9.41024	11.0459	35.4795	29.005	27.8643	8.2085	10.2688	29.0449
CYR16.82321	163.754	145.461	188.131	95.9032	76.7283	161.747	61.359	59.6486	60.3899	79.148	59.3248	130.604
CYR16.87512	18.5953	15.7842	21.5046	14.042	8.61983	20.0726	48.0399	13.1208	14.5544	13.0998	8.49797	21.4455
CYR16.94760	11.5723	16.148	9.74232	11.8588	4.23094	11.4019	20.2058	18.2473	16.0128	5.49976	3.49266	16.8754
CYR16.96145	44.7272	51.701	48.3011	42.8207	13.5249	19.9376	26.3072	18.884	18.2474	8.41892	8.57401	20.5767
CYR16.98278	428.332	336.183	407.337	236.379	201.84	366.59	136.174	145.641	140.051	165.622	134.854	269.199
CYR16.104273	306.899	353.651	446.48	225.981	322.436	77.883	356.08	402.637	339.537	364.239	287.118	400.841
CYR16.125439	25.3126	21.6341	22.9586	26.6261	18.5969	24.0069	2.75204	2.96323	1.92837	3.34921	1.26627	2.93038
CYR16.150062	43.2093	31.2967	39.8127	28.1134	22.2556	26.9582	136.769	36.2339	40.3568	26.0557	29.5535	41.4499
CYR16.157931	14.1014	24.9517	10.3573	16.5954	5.08755	7.09158	51.2825	18.069	17.4569	7.16198	5.98647	15.1203
CYR16.161836	0	0	0.216864	52.3133	0.269984	0	0.207963	0.15321	0.34443	0	0	0
CYR16.166085	108.394	143.977	123.907	93.7281	38.3578	47.0144	56.7363	55.4498	42.5541	25.1857	19.3539	60.9667
CYR16.167433	73.0477	111.171	81.9768	81.493	38.5914	46.5271	85.7972	79.088	61.0742	28.5296	21.6467	69.8805
CYR16.173274	324.428	260.514	353.256	238.438	110.599	333.809	150.631	222.102	100.825	129.781	62.919	196.379
CYR16.176164	100.981	124.052	98.6266	64.5142	25.9698	32.5796	54.0107	46.5106	37.5702	23.5461	11.8458	54.6423
CYR16.182179	100.373	70.8062	92.8159	56.4114	40.2138	62.3222	28.0351	28.3088	27.2747	28.432	17.9567	36.3348
CYR16.191621	88.7106	94.9868	99.0635	61.1476	39.1256	90.4904	44.5646	33.2367	40.5489	43.6183	28.6586	69.2476
CYR16.203107	190.516	191.186	235.638	142.446	123.761	169.7	105.335	94.9896	80.3512	83.5932	72.9304	117.754
CYR16.220589	71.5497	71.8405	79.6538	73.1793	52.3983	49.1474	198.6	62.8042	61.5363	58.2851	60.6379	78.032
CYR16.222928	32.3753	54.5616	39.5889	39.198	15.2488	28.7201	48.8709	43.2665	28.8328	16.7024	14.8201	35.3247
CYR16.226814	35.9645	18.7844	36.0353	22.101	20.6811	30.6016	14.4597	18.236	15.0184	10.9859	11.7277	18.8473
CYR16.231934	299.199	316.715	358.501	216.329	194.285	256.813	132.651	148.218	129.595	157.732	130.118	234.627
CYR16.234521	31.1167	38.1021	14.696	23.254	2.0011	4.11761	47.1229	45.2607	24.4347	13.006	7.40892	31.1584
CYR16.236568	124.421	101.07	115.617	75.3209	60.0981	108.634	44.0902	44.6494	42.8145	49.9112	43.0062	82.9437
CYR16.240804	17.8158	12.8269	17.6486	9.19527	9.01992	14.7222	4.81005	4.19986	5.90107	4.88538	3.86285	10.5491
CYR17.8707	6.91452	14.0355	6.85443	8.80575	7.34057	17.1388	18.8712	7.34186	10.0085	14.0893	8.87813	12.5557
CYR17.36554	33.7835	27.2536	28.882	29.8533	18.573	24.4863	2.74852	1.71336	2.97639	4.1254	2.05506	4.87772
CYR17.51099	70.8053	18.4397	171.602	25.3708	92.3724	79.9981	7.93924	6.38068	7.1722	7.327	5.05921	8.74192
CYR17.53245	77.4441	81.3697	86.2676	49.6916	29.8118	76.2729	41.2163	27.0028	36.935	35.0103	25.8645	59.4306
CYR17.86334	756.713	1153.26	498.841	685.707	206.832	212.907	2088.71	1550.65	1479.9	1185.28	944.926	1733.94
CYR17.115754	58.9631	40.4359	85.3728	40.7179	41.4679	69.4325	16.4026	10.494	11.9149	15.9344	13.071	23.5682
CYR17.120153	175.529	180.636	217.885	129.471	110.512	163.535	84.6088	90.8384	64.2974	112.365	88.6242	142.828
CYR17.144031	28.1917	5.2272	29.5039	8.51999	16.9741	29.2199	1.92907	0.631632	1.06498	1.46946	0.480785	1.15383
CYR17.155300	53.066	40.1761	49.7053	36.0327	27.1975	34.4329	156.257	43.3283	38.9943	35.07	29.3879	57.7919
CYR17.167485	117.402	99.0545	124.468	71.0598	61.2993	104.489	44.4481	42.7427	40.9356	51.0428	42.4997	82.8453
CYR17.172886	75.3728	76.4299	89.8737	68.9118	50.1802	51.1603	191.958	61.6178	55.9607	59.3959	61.5843	75.1657
CYR17.181937	369.682	230.794	495.381	220.986	222.36	464.322	111.165	75.8576	78.4794	118.303	77.1377	156.831
CYR17.183444	23.4771	19.0793	22.5223	19.6038	10.8642	20.4885	62.394	16.9995	18.8025	14.3104	11.801	28.9599
CYR17.191800	27.3942	24.8323	46.3885	39.9841	37.5094	38.8105	6.49131	16.0346	8.53753	16.2102	12.9903	23.7853
CYR17.203505	331.295	325.45	448.983	218.931	175.884	338.97	141.37	131.412	120.685	181.45	140.91	272.273
CYR17.214159	18.0512	13.2584	25.9756	11.3916	11.79	15.3386	2.33526	4.01432	2.79333	4.51561	3.10412	9.17892
CYR17.221844	57.3795	31.1081	59.4277	19.1643	31.594	35.6433	0.525241	6.38472	8.26413	2.35444	1.76724	7.47258
CYR17.245880	153.058	147.601	175.132	98.0769	81.1246	136.548	53.4429	56.3043	50.6769	69.6563	56.5741	118.505
CYR17.252760	1700.24	1625.13	2014.36	1075.29	1020.68	1227.07	1016.27	1026.87	773.983	755.234	549.605	1048.4
CYR17.253192	88.1542	83.1622	95.1003	57.2828	49.1989	61.7486	32.1332	52.1934	45.4898	37.9264	30.3756	56.4828
CYR17.255412	16.2966	25.1485	17.371	23.1542	9.78319	10.766	40.4552	30.6805	26.998	8.03183	10.142	23.7908
CYR17.259380	103.788	79.4848	94.2137	52.2813	43.1697	62.8583	27.0356	31.5151	25.5057	27.3421	17.8475	34.0815
CYR18.10911	43.3701	29.3079	43.3608	22.1025	15.0817	39.0003	52.397	16.9989	22.0932	17.3652	10.7827	38.0765
CYR18.18772	56.3043	36.5928	85.3728	40.9739	40.9075	74.9003	17.2658	11.554	10.7234	16.3896	13.1248	23.2363
CYR18.30896	39.2789	28.1432	75.363	17.3302	49.0652	55.9931	20.5558	12.7527	11.6469	8.90051	8.49367	14.1439
CYR18.32256	69.458	21.5833	165.937	27.9335	94.1383	81.4655	8.31919	7.69369	4.98364	7.0009	5.29381	8.57559
CYR18.49804	9.04696	14.6219	5.56348	9.24248	6.00276	16.9921	20.0601	9.11871	7.06889	14.0678	10.93	10.011
CYR18.54825	157.604	150.182	188.599	95.5587	73.2698	150.462	62.8057	62.7732	59.1795	74.1426	59.393	124.817
CYR18.66207	307.307	290.406	372.969	194.98	163.968	331.481	117.781	109.164	111.264	132.059	110.274	209.442
CYR18.72821	161.94	142.234	163.017	95.7841	77.5752	159.043	81.9489	59.5527	59.1951	78.4479	59.7743	124.329
CYR18.75310	101.851	70.6292	121.337	91.0658	86.993	118.897	38.672	24.8505	26.5224	31.1752	25.4757	33.146
CYR18.78720	169.584	408.98	117.038	1036.59	51.0615	54.4982	179.378	84.6249	87.491	15.3612	69.7672	277.158
CYR18.79059	65.401	44.7692	63.6707	28.4241	27.0009	58.0682	30.9744	24.461	31.186	27.6163	17.9111	42.8419
CYR18.85666	134.129	115.68	148.483	82.2578	66.2779	126.218	43.8233	53.2212	50.2862	59.3939	45.8507	97.998
CYR18.100374	96.0236	78.8723	87.5441	57.7037	52.3666	61.589	32.5216	50.147	43.7163	36.4551	30.1974	54.2075
CYR18.109201	16.3438	25.4983	20.9054	21.6636	8.05573	11.229	46.0613	29.1868	27.8665	8.05505	11.7774	26.9797
CYR18.114552	65.4608	59.1063	68.0656	55.2056	31.8609	62.1055	106.65	39.3568	28.9564	41.081	29.7034	65.4338
CYR18.115384	85.9421	55.2318	48.1605	66.3225	53.6705	89.6635	5.50536	10.1397	14.4369	14.194	11.3199	19.4047
CYR18.118877	185.564	183.471	218.56	126.967	103.088	172.263	72.8086	73.2982	57.9516	89.0016	67.9162	139.571
CYR18.121101	837.771	706.131	900.952	481.881	389.366	707.583	372.731	308.379	261.322	371.398	272.203	555.051
CYR18.135715	72.6562	73.3796	79.4369	35.2401	27.6367	55.0913	25.1667	27.512	22.6334	30.4685	21.7509	53.5872
CYR18.139582	76.5741	74.4688	76.1735	66.8256	49.4671	51.7987	180.48	59.0184	55.7191	60.381	59.2031	75.4718
CYR18.151452	36.5527	43.4364	42.942	20.2703	13.9293	37.5308	26.2542	19.3419	16.0825	16.6904	10.5546	26.5514
CYR18.173081	82.4913	37.8006	92.3259	27.1463	24.0668	84.0357	32.5502	14.2511	19.4076	11.7708	6.74501	23.6015
CYR18.173799	32.1223	25.0981	47.1438	36.2418	36.0739	38.3114	5.95434	15.9219	11.3226	16.8635	15.005	25.2695
CYR18.176499	24.6341	18.939	26.0618	28.7751	17.8726	26.8291	2.32977	2.96465	0.701562	2.90405	2.29622	3.42043
CYR18.177061	2902.33	2659.43	2971.17	1802.59	1228.92	2219.39	3547.76	1593.51	1458.22	1416.03	1128.51	2329.75
CYR18.187427	38.5835	31.4344	32.7537	23.0281	22.9852	34.966	24.77	22.7635	25.7988	18.8535	11.0741	30.0459
CYR18.190177	95.7545	240.274	81.2462	97.2778	38.601	101.919	36.4575	113.707	92.564	35.7199	26.1521	130.506
CYR18.193494	348.059	321.128	400.311	220.021	184.581	352.244	112.721	125.255	117.245	163.967	117.573	260.579
CYR18.194774	24.3927	7.44568	32.9838	7.988	15.8149	28.6192	2.13716	1.25958	1.41584	1.35247	0.479384	2.4653
CYR18.194970	67.8697	112.203	54.1788	61.3775	19.2291	58.9681	202.351	117.011	90.5773	32.206	24.2791	95.8563
CYR18.196234	52630.3	55819.3	41896.2	76282.9	92186.2	71383.8	75675.6	88022.7	92937.7	96209.8	85693.2	69912.4
CYR18.198316	84.9873	76.1516	64.9773	51.4025	35.8884	64.2543	75.6627	52.135	59.0937	36.068	24.4594	70.2801
CYR18.214898	174.408	87.5436	214.267	70.1312	75.2718	223.645	63.5045	30.0373	30.6057	29.468	16.0649	45.2273
CYR1.23045	822.887	614.614	839.122	723.446	505.894	570.521	329.498	215.914	216.779	264.624	243.173	331.948
CYR1.50990	1669.29	1586.68	2002.14	1077.78	1035.73	1245.88	1018	988.005	744.644	764.413	534.452	1003.65
CYR1.53418	24.1109	44.0717	18.7934	23.7488	8.84879	19.2333	114.717	37.5334	41.0414	16.9978	12.1145	34.915
CYR1.57345	175.132	155.313	176.166	82.2844	55.1678	141.532	101.674	69.9112	96.7183	70.3923	40.0574	134.326
CYR1.61388	39.5162	41.4541	29.2312	28.5837	8.33968	13.0779	36.3533	22.5872	19.9486	8.66175	6.46781	15.9992
CYR1.64175	95.1774	79.3575	96.1921	58.0811	55.7875	63.3406	33.279	47.368	51.3711	41.5749	33.217	58.2661
CYR1.68929	51.3624	51.5925	74.9816	33.518	38.2283	8.51971	73.1881	68.2971	51.8884	39.5447	31.2014	48.384
CYR1.86566	15.8778	24.0765	15.4777	19.7081	5.50543	11.369	40.5223	28.6385	24.5822	8.57283	7.9269	26.8144
CYR1.109397	94.6653	88.1642	114.657	85.9401	72.0507	81.3774	79.409	93.9886	68.3603	69.6728	59.9609	102.405
CYR1.109864	35.24	35.9373	13.391	23.4801	1.36649	4.69841	40.8399	42.8047	22.1397	11.8789	7.79135	26.5501
CYR1.117025	9.04404	9.66218	3.78195	7.46754	7.57026	17.3726	20.267	8.80143	11.4832	11.5881	8.29457	13.6171
CYR1.120908	3.7418	21.5867	1.07689	8.98588	0.223445	0.207642	179.172	22.4435	24.8	32.9484	12.8046	20.3835
CYR1.133069	2070.48	2015.8	2491.49	1591.24	1507.1	1800.68	762.379	842.433	711.128	996.385	986.437	1390.81
CYR1.156825	63.4513	65.7826	71.8564	66.1888	52.3144	47.5032	166.483	54.073	51.0558	54.372	58.2362	71.8504
CYR1.167799	9.41738	11.8217	11.0671	10.2799	2.81184	10.5825	20.3594	18.0308	15.9629	5.59685	3.80567	13.6582
CYR1.217465	386.119	417.769	397.699	230.442	182.021	303.95	274.712	228.516	235.406	179.499	141.73	280.326
CYR1.219292	94.6568	165.48	105.942	98.0031	28.8907	52.5274	123.232	71.5407	66.43	31.4502	25.0573	68.5903
CYR2.5392	21.2575	26.3108	17.906	21.5064	6.39865	12.5156	47.6975	29.6928	26.464	9.43269	6.95432	27.327
CYR2.20877	49.7574	44.963	47.7338	34.286	26.9894	31.0631	155.443	36.6737	40.1174	35.908	32.7282	46.4958
CYR2.63523	10.7489	16.9757	17.261	14.4116	4.55829	11.411	19.1322	19.9547	16.9115	5.10148	3.05389	18.5154
CYR2.65927	1047.56	1410.84	1663.04	816.976	1189.75	263.586	1247.57	1655.75	1392.27	1365.96	1135.83	1539.85
CYR2.78749	70.5424	75.1269	81.5062	74.4605	58.0213	49.363	207.341	57.7327	64.0494	64.5731	63.3997	79.4112
CYR2.87551	37.0081	23.4297	35.2401	20.1988	21.1721	33.0109	24.4626	25.8253	26.314	16.7576	12.728	28.3155
CYR2.95109	325.311	303.389	390.886	221.353	199.919	307.816	84.6011	112.165	92.3618	133.178	110.342	199.567
CYR2.121372	69.1743	127.146	73.4371	76.2713	28.0149	60.0688	65.8382	101.737	83.3759	30.4651	26.1218	103.378
CYR2.122350	9.26098	17.0671	5.77483	8.71914	8.57194	17.6016	20.6603	14.1223	8.81901	15.5008	6.84791	11.302
CYR2.133587	85.364	111.092	42.7527	53.6711	17.2419	25.543	79.6862	91.6041	118.747	72.1708	49.8667	112.94
CYR2.176136	228.562	193.778	273.07	140.174	114.56	206.493	87.4239	96.9868	75.787	99.5503	83.8895	167.999
CYR2.183624	79.6231	73.531	86.9041	50.8234	31.7656	71.7067	42.8326	30.7551	34.6987	34.7008	24.4254	62.6563
CYR2.192843	217.563	206.091	254.864	134.313	105.668	231.938	91.1788	86.3417	87.476	103.674	72.331	158.024
CYR2.201174	39.9148	37.1992	43.5057	19.9312	20.4884	7.91735	134.848	62.3926	58.3574	41.5312	24.7682	56.1166
CYR2.224127	33.7497	35.3448	13.2065	23.2678	1.94468	4.68213	45.5511	51.4659	25.542	14.0038	7.33094	29.5319
CYR2.224687	81.4413	75.271	76.8645	40.133	30.323	52.8344	31.8017	30.1794	27.2278	35.3186	20.4027	48.7052
CYR3.21955	78.5134	85.8682	92.8518	71.2046	66.5552	64.6023	96.9799	83.8321	66.903	63.129	53.8307	94.0928
CYR3.26341	94.7558	76.0169	95.2309	60.4313	52.9226	67.317	32.2502	51.6351	46.8025	39.4878	31.8726	61.2663
CYR3.45847	75.8964	76.001	88.6759	75.4283	56.5514	58.2092	214.05	58.9624	56.6113	62.3213	65.4513	80.141
CYR3.51813	205.591	307.576	150.025	271.199	57.414	74.9661	166.419	181.904	150.217	236.813	172.369	320.773
CYR3.69980	85.7344	123.681	83.2955	76.4488	29.8922	77.7279	118.81	100.113	88.6111	30.2021	21.9737	86.5389
CYR3.79288	25.8367	69.1308	7.3688	31.379	2.77993	4.13331	141.113	105.695	112.778	65.6096	45.2298	117.247
CYR3.96158	213.252	268.099	178.478	127.84	65.957	134.955	165.42	121.867	133.395	58.772	39.102	139.148
CYR3.96180	309.895	280.403	302.323	206.227	135.082	218.915	717.236	206.63	207.073	178.888	139.598	271.834
CYR3.105097	56.3638	46.1135	40.6039	35.7948	26.2759	35.4635	155.364	37.3483	37.033	37.4087	35.0946	45.8052
CYR3.110147	8.38763	10.9522	4.47029	8.64715	6.67834	16.9372	19.9337	8.52703	9.9398	15.8249	6.57072	13.5163
CYR3.120956	368.479	302.182	413.866	238.089	206.59	343.691	158.657	124.343	127.717	145.817	130.691	267.743
CYR3.141608	633.848	695.183	661.5	428.664	302.264	617.276	452.236	297.22	281.703	288.304	229.984	460.893
CYR4.40155	18.0531	23.7378	17.5853	20.1613	9.28788	12.0217	50.3353	31.6239	26.8717	11.3186	8.50141	25.544
CYR4.54080	13.1757	13.0884	8.87005	11.9853	8.92623	17.1884	17.2246	8.45977	10.3897	12.5601	7.79087	13.5732
CYR4.66053	26.303	84.9065	8.13976	37.6651	3.26527	4.23759	152.471	124.787	123.245	81.368	56.7091	139.464
CYR4.68839	348.106	338.226	385.131	226.32	177.277	327.426	133.151	136.879	122.604	162.99	136.194	245.403
CYR4.78146	59.2218	95.0572	53.7943	55.9014	21.8681	43.6595	174.236	92.6845	78.4634	26.2332	23.0245	75.9016
CYR4.83579	47.1917	45.5309	52.2528	32.3379	26.5671	32.7636	152.62	39.5925	41.6532	34.7965	32.7467	49.4182
CYR4.84722	73.9439	76.9683	88.1803	37.5665	27.3432	55.0625	29.3073	31.4954	26.4961	28.7843	21.7119	48.6946
CYR4.92846	14.7931	12.0112	19.1112	7.42804	8.48048	14.6668	4.89924	6.68397	5.10892	6.31566	4.40934	10.3261
CYR4.94015	20.7953	16.1071	18.4534	15.6061	7.14041	17.7425	45.6748	13.2131	14.06	13.7461	9.02941	17.8384
CYR4.95384	72.1786	83.5524	83.9359	53.9786	31.0699	73.7784	40.3204	30.3672	37.2374	36.2823	21.3497	62.4759
CYR4.152764	1053.56	725.909	1029.23	368.466	282.851	1064.6	412.001	308.822	310.37	332.99	182.16	619.209
CYR4.153033	59.2214	42.9389	92.3801	38.8588	39.5118	75.3765	15.3936	10.4512	10.4979	18.0665	12.2432	21.7031
CYR4.170156	121.788	104.702	133.315	88.2277	77.2425	123.435	50.0433	45.9726	42.6155	61.5433	52.0356	81.1759
CYR4.177351	70.1294	67.059	72.181	65.5046	49.489	53.4393	190.727	56.9528	59.5007	61.5	59.419	72.4689
CYR4.187304	5.37149	2.45941	70.1182	1.57057	1.83294	5.32281	4.05913	3.90055	2.33835	123.319	0.659781	19.1366
CYR4.211307	63.4723	60.1104	64.0136	44.1599	33.8768	57.1557	29.5167	27.103	22.3175	34.516	23.3489	48.1945
CYR4.222344	96.3584	76.5531	88.2378	61.0064	52.1708	66.5965	33.0406	53.7889	46.5806	40.7136	30.9106	61.9733
CYR4.230380	2249.17	1203.62	3259.22	1021.52	2034.78	2491.37	551.18	762.4	776.639	697.155	520.403	1065.5
CYR4.234619	40.0078	26.4225	46.0569	28.0559	20.9469	36.4639	15.3914	20.3774	18.8414	12.7046	11.0077	24.3588
CYR5.6033	184.02	165.321	211.476	128.78	110.444	162.943	63.0031	72.1623	58.8109	88.4322	81.2089	129.572
CYR5.18947	78.1976	77.3455	81.2002	71.5237	53.4529	51.1427	193.088	62.3166	54.4991	60.3459	66.7918	77.6643
CYR5.46132	85.6119	63.3927	67.6366	50.7895	27.4579	55.2844	193.373	47.3386	53.8782	41.216	38.7064	65.215
CYR5.52432	67.1445	69.9077	64.4138	44.3761	33.7292	64.0874	24.708	33.4269	25.855	31.8645	24.5202	43.1843
CYR5.79994	92.6454	84.9731	90.4071	61.6837	52.609	67.8274	36.9927	48.8634	47.2327	38.5874	35.1529	61.1575
CYR5.80097	10558.4	11711.2	10055.2	7564.58	4752.66	6823.83	7829.48	9804.8	7009.36	5786.86	5393.23	8261.89
CYR5.82109	197.054	193.373	254.212	126.725	99.3806	192.364	74.4818	63.0711	83.3016	77.0905	59.2103	121.963
CYR5.91264	17.1035	11.6279	17.5266	10.8201	9.13026	15.8545	5.54283	4.87384	3.99778	5.75187	5.21386	10.7252
CYR5.92339	76.723	63.3158	53.1086	50.651	24.4169	44.615	169.27	50.7533	52.1493	42.5716	33.8132	71.9931
CYR5.110966	350.761	374.525	535.335	356.457	257.418	295.573	130.559	118.864	211.134	234.536	155.296	332.263
CYR5.150672	22.5765	34.4936	19.0966	21.1993	8.31135	16.3002	85.981	32.2476	30.5148	11.8952	11.9391	26.7921
CYR5.158260	30.8822	41.1843	41.6811	24.6436	17.4665	31.3199	23.7079	14.7234	15.2518	16.5324	11.0606	22.903
CYR5.167229	55.7433	42.9858	48.8525	38.202	26.7803	37.0968	167.34	40.0523	39.2735	35.7875	36.1087	50.4079
CYR5.175685	7.83394	14.031	4.42079	10.9408	5.59539	15.5989	22.2566	9.83806	10.5319	12.9669	8.32057	13.2037
CYR5.183609	69.0437	45.1345	70.4044	44.2716	43.0561	67.6524	33.0912	19.6339	20.4143	24.2441	16.2733	29.7177
CYR5.215781	3073.73	2620.78	3283.93	1618.78	1456.56	2075.72	2777.23	1997.1	1962.51	1332.1	10201.7	3525.83
CYR5.216906	722.29	625.814	736.907	341.627	228.827	701.37	346.818	291.312	302.334	364.67	222.612	627.759
CYR5.227830	133.128	184.738	128.185	106.577	71.6759	35.1661	231.612	238.053	203.775	119.999	121.814	176.204
CYR5.229455	2867.57	2834.33	3400.16	2197.51	2105.74	2481.05	1068.31	1169.44	995.379	1371.15	1371.84	1914.91
CYR6.17817	108.233	74.7711	134.532	56.233	63.4933	115.214	29.2009	22.7471	18.8298	31.0514	18.791	50.4344
CYR6.25726	69.5349	133.975	82.9018	80.0713	27.7623	63.233	70.0702	96.1609	85.4306	34.1249	26.0574	115.165
CYR6.36840	13.4539	19.0021	15.0943	12.8192	3.44967	13.0337	20.3486	20.4003	20.1514	7.08031	4.47026	17.4232
CYR6.57554	12.6333	22.6554	12.336	11.4509	3.95168	9.7647	57.2806	19.4179	19.9361	7.33301	5.97426	16.9178
CYR6.58744	3474.3	2984.05	3753.62	1793.05	1760.3	2367.23	3000.04	2214.98	2232.23	1439.84	13043.2	4359.38
CYR6.61806	7.14386	11.5713	5.74795	7.4208	7.33939	14.962	18.6561	6.24739	10.5336	12.41	8.40117	12.5536
CYR6.64808	79.4819	69.5178	84.0001	72.1025	55.2001	55.3755	197.263	61.2681	60.551	65.3626	58.877	82.1839
CYR6.91109	94.3986	82.4645	88.9249	61.9381	47.4846	63.7309	31.5079	51.3905	45.9528	40.6722	29.5944	54.006
CYR6.110049	15.17	23.7513	15.8076	21.8412	6.45576	11.321	41.1453	32.6168	24.9069	8.12107	7.64607	26.8307
CYR6.113454	279.814	243.236	381.31	167.803	150.488	298.303	81.3822	69.4965	87.9153	87.7751	69.9346	133.9
CYR6.125765	17.4671	14.3711	15.0233	8.76635	9.91111	14.4837	4.80222	5.57895	5.20036	6.33128	5.31685	9.09053
CYR6.146162	62.6287	67.7535	66.1467	35.7997	32.2476	58.6546	23.9914	25.1732	26.0383	31.3429	24.1895	46.5443
CYR6.149963	515.011	569.006	572.426	334.815	344.773	109.598	460.108	574.742	511.693	429.911	357.059	585.872
CYR6.160914	92.9966	111.929	48.5598	75.4286	17.3397	23.2554	45.4839	36.5404	32.6433	31.4109	26.0729	44.6388
CYR6.171950	282.185	238.508	313.679	154.787	121.631	280.086	114.293	106.729	95.9035	133.471	89.9155	207.81
CYR6.172275	379.98	406.712	376.137	221.767	162.538	293.032	275.723	215.071	237.818	166.129	119.116	264.418
CYR6.174617	5.47388	2.924	68.829	0.8536	1.40091	4.88184	3.95665	2.91492	1.93612	108.597	0.47065	24.0655
CYR6.191236	64.3259	45.4425	60.8737	34.728	29.5644	50.0132	28.3858	30.0096	31.8731	18.86	15.828	39.9588
CYR6.191844	203.935	141.276	281.107	126.708	132.135	214.047	49.0538	46.5911	41.7466	66.225	48.0191	82.5276
CYR6.203007	483.844	612.977	780.215	425.88	590.298	134.458	587.849	761.855	636.659	669.875	563.405	689.243
CYR6.231433	124.805	102.349	136.382	78.0714	78.0274	125.712	46.8963	47.952	43.3547	58.204	51.1605	75.0824
CYR6.246226	48.8307	44.5882	47.8458	37.5854	25.6705	30.803	156.076	39.1764	35.7695	35.9404	32.7987	41.3374
CYR7.7231	270.501	291.21	393.862	192.879	286.134	66.9068	310.763	358.561	314.158	313.776	256.217	335.865
CYR7.17189	66.0516	47.7763	97.3903	38.856	43.3826	78.7269	15.8414	13.4125	16.6426	16.9577	11.5793	27.6377
CYR7.22992	255.027	228.305	322.743	140.567	92.1979	268.498	100.383	100.769	82.936	102.454	73.8429	185.238
CYR7.33477	178.335	464.929	204.241	130.51	53.9737	134.761	173.106	50.184	706.763	51.4635	21.0082	315.469
CYR7.49793	889.47	763.272	989.225	473.525	342.905	831.369	284.18	309.626	287.119	387.427	280.38	686.396
CYR7.53542	33.7124	32.0423	22.7505	24.1103	9.07083	11.7408	31.6556	24.2666	18.2436	9.47497	6.07712	16.9421
CYR7.55120	62.5576	57.5077	76.901	63.6816	53.9213	74.7578	11.2424	11.4377	12.7457	19.1981	14.1599	24.0844
CYR7.62450	14.3845	12.3544	24.6227	10.9298	9.88115	15.4951	3.37316	2.48506	3.22307	6.02082	4.75318	4.19038
CYR7.63567	114.19	94.6316	124.135	72.2262	57.2497	117.407	25.2808	32.5481	26.2197	40.1258	27.5276	68.1397
CYR7.72211	226.858	208.378	252.159	133.449	115.457	175.111	89.0765	94.2657	76.2411	97.6687	82.7336	145.053
CYR7.77065	178.107	167.764	217.93	122.384	100.478	172.652	65.318	66.8539	58.3015	80.6261	67.0186	130.772
CYR7.94946	48.6041	44.54	48.6372	36.933	23.0193	36.3884	158.618	38.1948	41.0176	36.9967	31.9912	50.2449
CYR7.96457	0	0.484312	0.652337	3.2165	0.270709	0	0.208521	1.99707	0	0.219932	0	0
CYR7.96953	412.536	295.114	430.592	159.761	119.089	524.345	134.642	119.637	129.158	97.6998	58.4047	213.211
CYR7.107437	94.8551	79.7267	88.8774	59.7503	51.365	62.731	32.6844	48.3886	49.4701	41.2357	29.8167	63.6195
CYR7.132579	176.162	145.03	167.141	93.9028	80.15	145.829	70.3455	58.3846	58.2534	72.9038	59.7542	122.746
CYR7.152618	20.1342	12.9412	19.0013	12.4186	10.8178	16.4416	4.66831	6.10183	4.86348	7.30626	5.96759	10.5385
CYR7.176396	67.1471	49.3572	43.2195	37.9013	18.735	53.9815	38.2778	25.2826	30.3864	21.3	13.1258	38.7751
CYR7.186722	82.9212	59.1371	62.9675	56.4827	31.8791	57.0635	201.478	48.044	54.5038	48.6148	37.3977	66.5584
CYR7.187514	27.7771	17.9035	27.0879	22.177	17.3642	22.8028	1.6895	2.33378	2.09863	2.78432	1.89485	2.76095
CYR7.205084	77.2192	76.4489	82.334	76.3813	60.1307	59.3126	219.365	66.4548	64.3477	61.0834	68.1462	80.4235
CYR7.205918	327.572	505.004	279.245	346.323	126.195	163.229	1394.27	734.374	738.681	572.039	446.521	793.972
CYR8.38831	46.5355	24.446	83.613	19.5051	47.9017	51.79	13.4818	15.334	12.9271	11.6002	8.04655	18.553
CYR8.44794	292.335	262.326	314.76	178.708	150.233	274.576	106.374	111.528	103.77	132.877	105.802	209.126
CYR8.51540	121.811	107.74	142.049	80.2139	78.5389	126.865	54.4065	54.2903	43.8774	55.3497	51.9878	91.9541
CYR8.59589	67.0671	70.1651	84.2048	52.4611	28.0533	70.9184	36.536	25.1361	31.5506	35.3116	23.5975	54.3355
CYR8.69873	16.5925	12.6327	21.0406	10.7215	9.79446	15.9809	5.26357	5.42885	5.08525	6.75447	5.18181	10.6592
CYR8.76359	85.1905	105.61	106.912	51.6139	47.7795	16.0554	83.7936	103.31	81.6351	69.4037	45.607	103.482
CYR8.84629	291.144	243.041	321.594	149.383	122.194	274.853	113.208	102.735	91.234	123.75	92.2667	223.988
CYR8.100293	48.1991	43.2097	45.2338	37.6301	25.6958	32.5614	155.772	39.3422	37.9963	35.7875	33.3699	48.6288
CYR8.101556	83.3065	94.0633	105.043	67.2492	53.5205	73.4956	23.8635	36.1754	28.1221	42.2314	36.5431	63.5248
CYR8.117542	29.201	34.0329	26.6243	20.2843	7.49386	15.9365	23.9775	18.3188	12.8695	7.61031	5.80995	17.2441
CYR8.120720	73.2678	74.1937	91.8489	72.8635	54.7579	52.1322	198.902	69.4589	61.2959	61.8239	66.3202	82.5223
CYR8.130713	57.0785	37.0661	53.3256	36.3452	29.0353	66.0398	15.6157	11.6307	11.2261	12.0359	7.8266	25.2053
CYR8.140947	29.7181	14.0288	22.9844	28.5421	16.5083	26.8463	2.96707	1.24908	2.28154	2.34708	1.26769	4.40051
CYR8.147957	650.986	712.43	643.973	642.045	313.624	429.515	562.99	346.371	380.422	407.812	286.325	474.721
CYR8.150830	36.5538	44.0835	40.0154	41.248	15.3558	30.6136	50.9577	39.8212	39.8065	14.9054	14.8084	42.9955
CYR8.152515	48.8936	51.9979	65.2408	32.6294	33.0902	8.63299	79.1239	55.5805	52.6553	35.0421	26.9051	49.0559
CYR8.153308	75.6627	124.946	66.9557	72.4113	23.2797	64.6671	204.578	132.391	97.5593	32.7422	24.5806	100.534
CYR8.157063	62.8608	63.1447	60.8733	39.3798	35.6493	54.7378	26.7324	31.8858	21.3843	31.6478	22.6391	44.1924
CYR8.159209	27.2465	71.6524	10.7235	29.869	2.78129	3.10149	125.114	110.482	100.591	70.7256	50.9384	114.174
CYR8.193628	75.5295	114.491	85.0354	74.2022	38.2384	52.9846	78.1366	79.5857	73.8248	29.5911	27.3488	64.3234
CYR8.200241	169.631	262.496	40.0958	176.672	10.0252	11.7423	159.432	111.885	117.504	88.1506	65.1966	157.62
CYR8.220643	16.5441	18.2844	16.6922	21.3287	8.17612	9.33903	41.9859	26.6785	25.2073	8.85671	10.4969	26.4359
CYR9.7799	112.381	79.9422	141.168	52.8345	56.5889	121.33	31.9881	18.6644	20.7678	29.825	16.8378	37.9818
CYR9.11752	179.739	191.11	228.264	158.829	116.533	165.603	88.4504	85.0789	70.8553	103.395	89.585	127.765
CYR9.14242	31.4393	34.4799	12.0109	19.589	1.66144	6.33013	45.048	40.7302	25.2229	9.8536	6.31541	26.3759
CYR9.21824	159.14	143.96	191.858	103.663	75.0666	161.48	66.61	62.0897	59.2244	75.6538	58.7687	128.008
CYR9.35925	90.0515	83.186	84.9278	57.5566	54.1121	62.089	33.1686	49.4452	48.8733	37.6116	30.738	58.4396
CYR9.43577	531.505	608.374	765.184	434.407	644.471	136.201	619.651	756.721	678.621	660.996	545.213	723.136
CYR9.44454	64.5409	47.5004	58.0177	45.2719	39.3025	72.8245	34.5254	20.2511	26.7696	25.3976	19.7308	35.1757
CYR9.46715	10.818	16.4372	13.1456	11.6776	4.21103	11.873	19.9043	19.5517	19.5962	4.5486	4.79542	21.9399
CYR9.59850	69.8979	63.1527	84.1673	72.3374	50.5342	53.0603	189.856	63.3984	56.7259	60.577	63.7727	75.1298
CYR9.92595	56.7433	32.7474	53.0353	34.2563	25.8585	58.8253	18.2957	11.0055	13.3438	10.9762	6.77705	21.8147
CYR9.117321	32.713	17.9667	23.2054	27.159	17.3338	24.5452	1.9074	2.34202	2.28154	2.79414	1.90154	3.5856
CYR9.131031	20.2965	23.6051	27.6046	18.2291	10.5349	25.5201	16.7811	12.7112	11.7435	12.8383	7.15719	17.2674
CYR9.173518	16.7608	17.6708	20.099	13.6015	7.81394	19.8258	46.8663	11.509	15.1209	12.5183	8.72251	23.4035
CYR9.183425	83.5644	89.701	108.224	62.1149	37.228	92.9647	45.2103	34.251	38.6514	42.9545	29.2872	73.3361
CYR9.187713	129.376	106.666	139.338	80.1155	74.9327	127.688	43.9989	49.5929	49.3645	60.842	54.7286	85.7601
CYR9.196103	53.4226	42.9733	53.0588	35.2179	28.6074	30.6918	148.018	40.0407	39.4216	38.8262	31.4868	53.5057
CYR9.225526	37.6255	34.6798	25.0072	20.2673	6.6573	14.6019	24.6595	20.1671	15.5497	8.70944	5.75125	20.3556
CYR9.230111	403.735	306.899	372.116	217.66	178.834	331.839	146.334	169.45	162.096	150.449	102.973	245.887
CYR9.245845	61.1377	104.331	32.6715	60.1305	17.6419	14.3449	64.7373	65.63	52.0463	45.4869	39.9367	64.0088

## Sheet: fungi-contig analysis
	3-nop	con	sem	p-value	FC	log2(FC)
contig1	89.476	78.966	12.572	0.2002	1.1331	0.180269
contig2	19.019	25.334	12.009	0.4233	0.75073	-0.413633
contig3	9.15	12.342	3.62	0.1495	0.741371	-0.431733
contig4	5.97	48.759	29.625	0.0104	0.122439	-3.02987
contig5	1912.8	948.261	247.567	0.0039	2.01717	1.01233
contig6	61.183	76.012	22.131	1	0.804912	-0.313096
contig7	9.33	12.902	4.101	0.2002	0.723144	-0.467646
contig8	319.667	223.365	61.792	0.0782	1.43114	0.517167
contig9	90.917	64.383	33.634	0.3367	1.41213	0.49787
contig10	679.414	266.99	77.505	0.0039	2.54472	1.34751
contig11	1436.25	842.194	234.439	0.0039	1.70536	0.770079
contig12	23.134	42.887	19.889	0.4233	0.539418	-0.890526
contig13	130.933	85.513	33.968	0.1093	1.53115	0.614613
contig14	26.7	18.336	9.938	0.2623	1.45615	0.542161
contig15	74.656	44.179	11.559	0.0104	1.68985	0.756897
contig16	43.034	52.084	15.692	0.5218	0.826242	-0.275363
contig17	15.336	22.843	7.769	0.2002	0.671365	-0.57483
contig18	52.247	29.078	12.153	0.025	1.79679	0.84542
contig19	17.934	29.334	10.16	0.1495	0.611372	-0.709877
contig20	18.6	1.196	4.314	0.0039	15.5518	3.95901
contig21	46.281	21.019	7.09	0.0039	2.20186	1.13873
contig22	39.963	57.016	23.176	0.7488	0.700909	-0.512702
contig23	327.878	126.059	204.727	0.5218	2.60099	1.37906
contig24	23.165	2.449	2.322	0.0039	9.45896	3.24168
contig25	221.026	116.917	47.771	0.0163	1.89045	0.918731
contig26	47.287	4.441	14.823	0.0039	10.6478	3.41249
contig27	96.039	29.036	17.902	0.0039	3.30758	1.72578
contig28	70.439	41.201	12.19	0.0104	1.70964	0.773695
contig29	15.755	18.961	7.28	1	0.830916	-0.267225
contig30	56.275	37.615	11.24	0.0782	1.49608	0.581186
contig31	58.545	78.005	25.572	0.7488	0.750529	-0.414021
contig32	60.375	89.844	35.383	0.3367	0.671998	-0.573471
contig33	55.268	17.384	14.88	0.0104	3.17925	1.66868
contig34	351.085	197.7	65.014	0.0104	1.77585	0.828507
contig35	420.348	189.199	104.74	0.025	2.22172	1.15168
contig36	127.884	37.555	21.331	0.0039	3.40525	1.76776
contig37	278.298	732.499	176.928	0.0065	0.37993	-1.3962
contig38	530.189	254.704	122.602	0.0104	2.08159	1.05769
contig39	121.888	37.813	12.856	0.0039	3.22344	1.6886
contig40	9.477	19.003	7.698	0.1495	0.498711	-1.00372
contig41	18.936	28.545	9.601	0.1495	0.663374	-0.592106
contig42	292.315	363.114	70.983	0.1495	0.805023	-0.312899
contig43	73.944	44.045	12.227	0.0163	1.67883	0.747455
contig44	44.301	51.047	17.613	0.5218	0.867847	-0.204487
contig45	89.685	24.02	18.694	0.0039	3.73376	1.90063
contig46	15.095	6.363	2.712	0.0039	2.37231	1.24629
contig47	39.643	59.722	23.765	0.5218	0.663792	-0.591196
contig48	11.779	14.789	5.351	0.4233	0.79647	-0.328307
contig49	64.481	36.806	14.239	0.0374	1.75192	0.808933
contig50	22.426	2.593	3.232	0.0039	8.64867	3.11248
contig51	69.757	87.519	27.637	0.7488	0.79705	-0.327258
contig52	33.606	34.164	10.698	0.7488	0.983667	-0.0237581
contig53	256.535	173.564	119.696	0.3367	1.47804	0.563688
contig54	36.558	12.057	6.695	0.0039	3.0321	1.60032
contig55	321.193	123.098	200.82	0.5218	2.60925	1.38363
contig56	59.455	18.711	16.047	0.0104	3.17754	1.66791
contig57	18.249	1.806	4.902	0.0039	10.1047	3.33695
contig58	168.042	96.149	25.78	0.0065	1.74772	0.805478
contig59	112.327	57.369	22.302	0.0104	1.95797	0.969361
contig60	32.01	16.251	6.45	0.0104	1.96972	0.977994
contig61	26.859	15.979	4.508	0.0163	1.68089	0.749228
contig62	14.747	20.294	7.418	0.2623	0.726668	-0.460632
contig63	52.756	28.235	13.28	0.025	1.86846	0.901851
contig64	1648.88	511.547	446.88	0.0163	3.22333	1.68855
contig65	223.338	160.606	61.329	0.1093	1.3906	0.475703
contig66	17.743	24.224	7.581	0.2623	0.732455	-0.449187
contig67	113.261	57.2	20.96	0.0163	1.98009	0.985564
contig68	147.689	77.572	26.224	0.0104	1.9039	0.928954
contig69	15.313	5.408	2.633	0.0039	2.83155	1.50159
contig70	61.602	16.394	16.289	0.0065	3.75759	1.90981
contig71	52.765	26.706	12.613	0.0374	1.97577	0.982417
contig72	74.742	44.205	11.453	0.0104	1.6908	0.75771
contig73	70.047	87.216	27.668	1	0.803144	-0.31627
contig74	293.308	355.975	65.502	0.2002	0.823957	-0.27936
contig75	290.721	772.976	193.105	0.0065	0.376106	-1.41079
contig76	66.851	38.077	14.214	0.0374	1.75568	0.812029
contig77	38.033	58.87	22.927	0.2623	0.646051	-0.630281
contig78	59.067	16.524	10.61	0.0039	3.57462	1.83779
contig79	102.215	29.27	21.786	0.0039	3.49214	1.80411
contig80	27.988	2.47	2.775	0.0039	11.3312	3.50223
contig81	56.407	13.805	10.154	0.0039	4.08598	2.03068
contig82	80.88	7.366	23.399	0.0039	10.9802	3.45683
contig83	110.723	56.318	17.348	0.0104	1.96603	0.975287
contig84	120.653	29.258	28.394	0.0039	4.12376	2.04396
contig85	22.153	15.254	7.477	0.2623	1.45227	0.538314
contig86	17.153	26.177	8.23	0.3367	0.65527	-0.609839
contig87	42.894	18.557	7.157	0.0039	2.31147	1.20881
contig88	19.923	1.607	4.506	0.0039	12.3976	3.63199
contig89	69.334	37.875	14.269	0.0547	1.8306	0.872317
contig90	65.804	83.85	29.075	1	0.784782	-0.349636
contig91	247.044	172.461	49.132	0.0782	1.43246	0.518498
contig92	80.095	53.353	33.318	0.3367	1.50123	0.586143
contig93	50.194	36.492	16.696	0.7488	1.37548	0.459935
contig94	43.685	12.299	8.117	0.0039	3.55191	1.8286
contig95	103.481	103.012	49.239	0.631	1.00455	0.00655349
contig96	16.563	20.076	8.045	0.7488	0.825015	-0.277508
contig97	296.326	366.04	67.104	0.2002	0.809545	-0.304816
contig98	74.658	44.777	11.102	0.0065	1.66733	0.737539
contig99	80.917	37.898	13.038	0.0065	2.13513	1.09432
contig100	171.014	82.185	31.507	0.0104	2.08084	1.05717
contig101	39.084	60.14	23.005	0.3367	0.649884	-0.621747
contig102	12.445	21.247	10.273	0.4233	0.58573	-0.771693
contig103	53.612	28.438	8.211	0.0104	1.88522	0.914736
contig104	72.339	36.65	36.428	0.2002	1.97378	0.98096
contig105	339.793	123.757	216.426	0.5218	2.74565	1.45715
contig106	21.245	11.899	4.525	0.0547	1.78544	0.836283
contig107	75.763	45.514	12.861	0.0163	1.66461	0.735183
contig108	96.07	46.522	19.091	0.0104	2.06504	1.04617
contig109	90.976	54.835	38.648	0.1495	1.65909	0.730389
contig110	16.68	23.97	7.935	0.2002	0.69587	-0.523111
contig111	98.634	52.592	20.199	0.0104	1.87546	0.907242
contig112	98.368	33.668	12.487	0.0039	2.92171	1.54681
contig113	30.81	9.318	5.368	0.0039	3.3065	1.72531
contig114	22.115	14.357	7.144	0.2623	1.54036	0.623271
contig115	78.044	101.015	33.334	1	0.772598	-0.37221
contig116	55.658	52.576	20.156	0.7488	1.05862	0.0821847
contig117	32.654	30.626	15.474	1	1.06622	0.0925028
contig118	1401.1	1809.62	351.313	0.2623	0.774252	-0.369125
contig119	126.937	117.51	37.413	0.631	1.08022	0.111329
contig120	52.795	27.991	12.376	0.025	1.88614	0.915438
contig121	30.463	3	3.396	0.0039	10.1543	3.34402
contig122	41.802	58.348	22.579	0.8728	0.716426	-0.481111
contig123	99.817	8.578	29.35	0.0039	11.6364	3.54057
contig124	53.829	29.263	13.654	0.0782	1.83949	0.879306
contig125	152.301	38.711	31.756	0.0039	3.93431	1.97611
contig126	13.197	6.303	2.361	0.0104	2.09376	1.0661
contig127	16.461	21.55	29.69	0.8728	0.763852	-0.388636
contig128	71.999	43.114	11.383	0.0104	1.66997	0.73982
contig129	245.781	124.83	51.275	0.0163	1.96893	0.977409
contig130	199.81	41.312	53.828	0.0039	4.83661	2.274
contig131	355.308	195.824	68.248	0.0104	1.81443	0.859513
contig132	307.502	112.741	190.751	0.5218	2.72751	1.44758
contig133	16.954	1.231	4.386	0.0039	13.7725	3.78372
contig134	57.973	74.036	30.997	0.631	0.783038	-0.352846
contig135	17.45	27.49	8.677	0.2002	0.634776	-0.65568
contig136	1177	616.419	176.17	0.0104	1.90942	0.933132
contig137	67.868	85.097	26.411	1	0.797537	-0.326377
contig138	23.558	18.148	8.034	0.5218	1.2981	0.376406
contig139	26.731	2.805	2.391	0.0039	9.52977	3.25244
contig140	38.451	60.754	22.723	0.2623	0.632897	-0.659958
contig141	4639.56	1712.5	933.611	0.0039	2.70923	1.43788
contig142	41.554	55.224	17.171	0.3367	0.752463	-0.410308
contig143	246.985	130.051	52.452	0.0104	1.89914	0.925346
contig144	254.319	143.057	38.495	0.0104	1.77775	0.830049
contig145	47.482	68.883	26.151	0.3367	0.689314	-0.536767
contig146	288.888	358.409	68.848	0.2002	0.806029	-0.311097
contig147	23.189	2.532	1.48	0.0039	9.15837	3.19509
contig148	31.941	51.737	20.463	0.3367	0.617372	-0.695787
contig149	13.031	19.18	9.709	0.4233	0.679406	-0.557655
contig150	8.8	0.118	8.761	0.6691	74.5763	6.22064
contig151	92.563	43.374	24.385	0.0782	2.13407	1.09361
contig152	72.134	57.669	21.675	0.3367	1.25083	0.322883
contig153	270.174	143.773	60.896	0.025	1.87917	0.910096
contig154	74.454	38.021	23.348	0.1093	1.95823	0.969553
contig155	69.799	73.861	22.303	0.3367	0.945005	-0.0816064
contig156	70.49	27.724	11.647	0.0039	2.54256	1.34628
contig157	78.921	43.312	15.417	0.0374	1.82215	0.865642
contig158	175.541	92.492	23.095	0.0039	1.8979	0.924408
contig159	66.295	86.649	27.645	0.8728	0.765098	-0.386283
contig160	34.949	31.303	11.001	0.7488	1.11647	0.15895
contig161	27.361	14.879	4.512	0.0065	1.8389	0.878843
contig162	273.64	155.49	42.033	0.0104	1.75986	0.815457
contig163	18.881	28.065	12.612	0.2623	0.67276	-0.571837
contig164	97.527	51.236	16.563	0.0104	1.90349	0.928644
contig165	13.538	5.701	2.606	0.0104	2.37467	1.24773
contig166	16.088	20.96	7.916	0.5218	0.767557	-0.381654
contig167	23.589	16.529	8.211	0.2623	1.42713	0.513115
contig168	46.143	22.219	6.53	0.0039	2.07674	1.05432
contig169	246.541	67.392	51.024	0.0039	3.65831	1.87118
contig170	16.792	23.312	6.8	0.2623	0.720316	-0.473299
contig171	138.621	75.079	29.158	0.0163	1.84634	0.884664
contig172	16.436	19.793	7.824	0.631	0.830395	-0.268131
contig173	10.826	13.389	4.463	0.3367	0.808574	-0.306548
contig174	36.835	16.835	9.412	0.0547	2.188	1.12961
contig175	329.444	165.257	58.8	0.0104	1.99353	0.995322
contig176	56.065	15.231	9.524	0.0039	3.68098	1.88009
contig177	162.928	97.26	26.719	0.0163	1.67518	0.744316
contig178	19.606	1.122	4.693	0.0039	17.4742	4.12715
contig179	40.102	60.138	23.601	0.5218	0.666833	-0.584603
contig180	96.295	50.752	16.867	0.0104	1.89736	0.923996
contig181	68.655	84.28	28.034	0.8728	0.814606	-0.295826
contig182	333.921	102.962	64.873	0.0039	3.24315	1.69739
contig183	19.339	25.545	9.583	0.7488	0.757056	-0.401528
contig184	35.82	14.008	5.859	0.0039	2.55711	1.35451
contig185	306.586	164.683	62.706	0.0163	1.86167	0.8966
contig186	15.968	4.324	3.265	0.0039	3.69288	1.88475
contig187	39.053	4.461	7.871	0.0039	8.75432	3.12999
contig188	131.923	67.527	25.037	0.0104	1.95363	0.96616
contig189	1443.8	861.727	244.013	0.0104	1.67547	0.744564
contig190	72.441	42.434	12.032	0.0104	1.70715	0.771586
contig191	17.087	23.35	7.617	0.3367	0.731777	-0.450523
contig192	72.633	27.221	12.049	0.0039	2.66827	1.41591
contig193	27.139	3.083	2.617	0.0039	8.80279	3.13796
contig194	76.431	7.103	23.123	0.0039	10.7604	3.42766
contig195	66.81	37.577	14.036	0.0374	1.77795	0.830214
contig196	585.71	1497.23	311.815	0.0065	0.391194	-1.35404
contig197	10.182	11.957	3.485	0.2002	0.851551	-0.231834
contig198	72.35	41.207	11.196	0.0065	1.75577	0.812104
contig199	32.037	26.286	11.267	0.3367	1.21879	0.285444
contig200	17.283	24.988	8.307	0.2002	0.691652	-0.531882
contig201	56.967	51.864	17.566	0.3367	1.09839	0.135393
contig202	66.498	12.5	9.087	0.0039	5.31984	2.41138
contig203	164.986	83.425	29.243	0.0104	1.97766	0.983792
contig204	670.614	356.848	125.428	0.0104	1.87927	0.910173
contig205	57.24	30.186	13.72	0.0163	1.89624	0.923144
contig206	65.885	81.712	24.997	1	0.806308	-0.310598
contig207	32.444	19.246	7.596	0.0782	1.68575	0.753393
contig208	57.978	18.054	16.63	0.0104	3.21137	1.68319
contig209	35.832	15.056	5.577	0.0065	2.37991	1.25091
contig210	23.852	2.436	2.199	0.0039	9.79146	3.29152
contig211	2297.3	1912.29	645.44	0.3367	1.20133	0.264638
contig212	30.625	22.218	5.29	0.0547	1.37839	0.462981
contig213	55.842	15.382	10.161	0.0039	3.63035	1.86011
contig214	109.179	72.518	46.38	0.3367	1.50554	0.590284
contig215	304.391	149.557	57.716	0.0104	2.03528	1.02523
contig216	19.541	1.518	4.685	0.0039	12.8729	3.68626
contig217	62.304	93.714	38.62	0.3367	0.664831	-0.58894
contig218	65033.1	84741.9	11612.4	0.0782	0.767426	-0.381901
contig219	62.944	52.95	15.21	0.4233	1.18874	0.249438
contig220	140.878	35.818	35.862	0.0039	3.93316	1.97569
contig221	44.196	12.749	10.24	0.0065	3.46662	1.79353
contig222	76.753	6.978	22.039	0.0039	10.9993	3.45934
contig223	10.245	11.876	3.776	0.4233	0.862664	-0.213129
contig224	135.946	73.852	27.96	0.0163	1.84079	0.880325
contig225	276.852	131.664	48.995	0.0104	2.10272	1.07225
contig226	133.265	77.208	25.533	0.025	1.72605	0.787476
contig227	98.462	29.974	10.189	0.0039	3.28491	1.71586
contig228	306.291	118.963	193.959	0.5218	2.57467	1.36439
contig229	47.889	29.165	10.428	0.0782	1.642	0.715456
contig230	112.174	58.429	21.154	0.0104	1.91983	0.940982
contig231	72.352	68.486	26.992	1	1.05645	0.0792238
contig232	11.166	12.875	4.049	0.5218	0.867262	-0.20546
contig233	55.944	87.502	25.3	0.1093	0.639345	-0.645333
contig234	192.773	101.939	37.346	0.0104	1.89106	0.919197
contig235	65.726	38.345	13.838	0.0374	1.71407	0.777426
contig236	191.739	99.838	36.268	0.0104	1.9205	0.941483
contig237	28.159	63.002	21.192	0.025	0.446954	-1.1618
contig238	39.132	57.894	23.506	0.631	0.675925	-0.565065
contig239	18.699	28.904	12.901	0.2623	0.646935	-0.628308
contig240	59.478	32.273	12.635	0.025	1.84296	0.882028
contig241	17.649	24.595	9.008	0.2002	0.717585	-0.478779
contig242	12.561	13.778	5.052	0.4233	0.911671	-0.133415
contig243	1065.29	1389.54	276.889	0.2623	0.766653	-0.383354
contig244	68.17	89.418	28.695	1	0.762374	-0.391428
contig245	28.343	22.4	5.617	0.3367	1.26531	0.339494
contig246	291.446	122.036	45.696	0.0039	2.3882	1.25592
contig247	40.103	58.009	23.742	0.7488	0.691324	-0.532567
contig248	9.345	12.385	3.795	0.3367	0.754542	-0.406327
contig249	312.149	159.161	54.616	0.0104	1.96122	0.971748
contig250	556.456	335.057	103.096	0.025	1.66078	0.731861
contig251	76.599	76.461	11.802	1	1.0018	0.00260149
contig252	74.446	43.886	11.93	0.0104	1.69635	0.762434
contig253	71.794	89.59	30.119	1	0.801362	-0.319474
contig254	177.795	204.749	67.847	0.5218	0.868356	-0.203642
contig255	79.463	74.375	28.223	0.631	1.06841	0.0954655
contig256	23.438	97.945	24.889	0.0104	0.239298	-2.06312
contig257	164.763	109.617	49.216	0.1495	1.50308	0.587921
contig258	242.141	286.877	115.532	0.631	0.844059	-0.244585
contig259	754.102	360.925	205.113	0.0782	2.08936	1.06306
contig260	58.048	14.726	10.832	0.0039	3.94187	1.97888
contig261	108.118	55.564	14.733	0.0065	1.94583	0.960384
contig262	62.967	83.428	25.368	0.7488	0.754747	-0.405936
contig263	14.446	25.569	30.895	0.8728	0.564981	-0.823726
contig264	53.798	30.833	8.875	0.0163	1.74482	0.803077
contig265	73.487	44.501	11.77	0.0163	1.65136	0.723651
contig266	2043.28	728.88	420.295	0.0065	2.80331	1.48713
contig267	32.992	17.114	5.897	0.0065	1.92778	0.946939
contig268	16.808	25.699	8.348	0.2623	0.654033	-0.612564
contig269	12.206	11.666	2.712	0.7488	1.04629	0.0652805
contig270	27.42	113.007	27.697	0.0104	0.24264	-2.04311
contig271	300.414	156.203	51.446	0.0104	1.92323	0.94353
contig272	54.917	78.424	32.245	0.4233	0.700258	-0.514042
contig273	39.441	58.471	23.152	0.5218	0.67454	-0.568025
contig274	59.844	31.082	13.557	0.0374	1.92536	0.945127
contig275	12.748	6.291	2.665	0.0104	2.02639	1.01891
contig276	15.974	18.927	7.391	0.5218	0.84398	-0.24472
contig277	66.416	38.005	13.959	0.0374	1.74756	0.805342
contig278	361.678	197.109	71.777	0.0104	1.83491	0.875712
contig279	20.33	33.228	14.672	0.4233	0.611833	-0.708789
contig280	31.196	17.363	5.858	0.0104	1.79669	0.845345
contig281	41.61	61.495	25.387	0.8728	0.67664	-0.563539
contig282	9.737	12.853	3.885	0.4233	0.757566	-0.400556
contig283	56.594	23.896	8.208	0.0039	2.36835	1.24388
contig284	68.81	85.784	27.077	1	0.802131	-0.31809
contig285	2354.92	3632.74	1659.41	0.7488	0.648248	-0.625382
contig286	559.472	359.251	146.704	0.1495	1.55733	0.639074
contig287	109.912	181.91	42.512	0.0782	0.604211	-0.726876
contig288	2647.72	1315.17	333.24	0.0039	2.01322	1.0095
contig289	58.362	73.288	32.239	0.631	0.796338	-0.328548
contig290	57.276	30.593	8.943	0.0065	1.87219	0.904729
contig291	160.497	82.198	25.425	0.0104	1.95257	0.965371
contig292	75.024	44.664	10.789	0.0065	1.67974	0.74824
contig293	8577.62	7347.6	1745.05	0.4233	1.1674	0.223305
contig294	177.185	79.853	31.854	0.0065	2.21889	1.14984
contig295	13.677	6.018	2.439	0.0065	2.27268	1.1844
contig296	52.138	70.092	27.707	0.8728	0.743851	-0.426915
contig297	15.724	23.544	8.093	0.2002	0.667856	-0.582391
contig298	253.492	88.401	44.857	0.0039	2.86752	1.51981
contig299	13.337	6.053	1.995	0.0065	2.20337	1.13971
contig300	53.872	29.547	9.995	0.0104	1.82326	0.866524
contig301	407.605	486.564	109.7	0.3367	0.837721	-0.255458
contig302	61.585	36.132	18.748	0.3367	1.70444	0.769302
contig303	231.813	124.687	49.21	0.0163	1.85916	0.89465
contig304	306.694	213.046	64.794	0.1093	1.43957	0.525635
contig305	14.061	23.657	28.341	1	0.59437	-0.750568
contig306	92.079	28.509	17.771	0.0039	3.22982	1.69145
contig307	47.491	27.486	9.265	0.025	1.72783	0.788957
contig308	183.201	55.694	31.203	0.0039	3.28942	1.71783
contig309	504.612	651.481	118.621	0.2002	0.774561	-0.368549
contig310	107.558	53.775	15.097	0.0039	2.00015	1.00011
contig311	39.221	56.85	23.767	1	0.689903	-0.535534
contig312	76.246	71.168	28.435	0.8728	1.07135	0.099433
contig313	12.809	14.979	5.06	0.2623	0.855131	-0.225783
contig314	12.132	21.143	10.112	0.4233	0.573807	-0.801363
contig315	2688.76	4381.62	2125.28	0.7488	0.613645	-0.704524
contig316	9.031	11.467	3.175	0.2623	0.787564	-0.34453
contig317	69.28	87.584	27.111	0.8728	0.791012	-0.338228
contig318	73.157	42.187	11.576	0.0104	1.73411	0.794197
contig319	72.884	44.202	12.196	0.0163	1.64888	0.72149
contig320	134.702	73.731	26.101	0.0104	1.82694	0.869428
contig321	15.292	6.574	2.436	0.0039	2.32613	1.21793
contig322	62.031	17.012	11.656	0.0039	3.64631	1.86644
contig323	45.057	27.858	10.753	0.0782	1.61738	0.69366
contig324	58.409	76.1	32.038	0.631	0.76753	-0.381706
contig325	22.519	2.26	1.978	0.0039	9.96416	3.31675
contig326	71.971	93.303	29.334	0.8728	0.771369	-0.374508
contig327	291.261	779.976	189.56	0.0065	0.373423	-1.42112
contig328	217.89	107.604	51.262	0.0374	2.02492	1.01787
contig329	194.458	219.666	165.246	0.5218	0.885244	-0.175853
contig330	714.961	372.522	167.881	0.0163	1.91925	0.940539
contig331	22.238	17.777	7.98	0.4233	1.25094	0.323015
contig332	64.888	15.478	5.849	0.0039	4.19227	2.06773
contig333	14.611	4.008	2.692	0.0039	3.64546	1.8661
contig334	96.64	36.64	17.713	0.0065	2.63755	1.3992
contig335	185.235	97.507	31.93	0.0104	1.89971	0.925779
contig336	250.249	314.89	58.972	0.1495	0.794719	-0.331484
contig337	159.886	78.148	28.119	0.0104	2.04594	1.03276
contig338	39.687	59.511	23.972	0.5218	0.666885	-0.58449
contig339	0.771	0.404	0.822	0.3191	1.90842	0.932376
contig340	323.573	125.459	86.505	0.0374	2.57911	1.36688
contig341	38.755	58.483	23.044	0.5218	0.662671	-0.593635
contig342	79.446	38.41	13.306	0.0065	2.06837	1.04849
contig343	22.262	14.305	6.761	0.1495	1.55624	0.638064
contig344	69.844	90.054	27.956	0.8728	0.775579	-0.366654
contig345	46.482	13.923	8.353	0.0039	3.3385	1.7392
contig346	23.105	2.419	3.147	0.0039	9.55147	3.25572
contig347	565.429	409.773	103.916	0.0782	1.37986	0.464521
contig348	34.645	33.882	10.537	0.8728	1.02252	0.0321281
contig349	40.081	49.727	15.457	0.3367	0.806021	-0.311111
contig350	71.32	98.731	40.449	0.3367	0.722367	-0.469196
contig351	52.774	29.747	8.403	0.0104	1.77409	0.827083
contig352	24.229	95.338	22.268	0.0104	0.254138	-1.97632
contig353	73.414	58.802	20.613	0.3367	1.24849	0.32019
contig354	111.777	116.631	58.384	1	0.958382	-0.0613279
contig355	15.061	23.277	7.107	0.1495	0.647034	-0.628088
contig356	45.632	13.324	10.784	0.0039	3.4248	1.77602
contig357	245.489	128.246	43.624	0.0104	1.9142	0.936745
contig358	109.536	58.644	17.418	0.0104	1.86781	0.90135
contig359	62.145	34.411	12.497	0.0374	1.80596	0.852769
contig360	14.46	6.396	2.614	0.0065	2.26079	1.17683
contig361	68.86	81.205	23.768	1	0.847977	-0.237902
contig362	233.702	124.53	53.368	0.0163	1.87667	0.908177
contig363	23.82	2.469	2.624	0.0039	9.64763	3.27017
contig364	173.346	94.188	23.079	0.0065	1.84043	0.880039
contig365	20.965	13.083	4.016	0.0374	1.60246	0.680289
contig366	17.585	25.591	11.852	0.4233	0.687156	-0.541291
contig367	15.962	19.69	7.701	0.8728	0.810665	-0.302822
contig368	78.966	43.948	16.684	0.0374	1.79681	0.845434
contig369	109.686	57.381	17.212	0.0104	1.91154	0.934734
contig370	40.662	58.55	22.587	0.4233	0.694483	-0.525988
contig371	139.195	75.059	28.276	0.0163	1.85447	0.89101
contig372	23.14	15.865	7.826	0.2623	1.45856	0.544541
contig373	301.847	162.865	54.913	0.0104	1.85336	0.890141
contig374	48.376	55.308	18.408	0.3367	0.874666	-0.193197
contig375	71.987	43.046	10.878	0.0104	1.67233	0.741857
contig376	520.024	664.056	119.867	0.1495	0.783103	-0.352727
contig377	54.576	26.975	7.945	0.0039	2.02321	1.01664
contig378	11.36	15.056	4.944	0.2002	0.754516	-0.406376
contig379	65.525	84.91	26.299	0.631	0.771699	-0.373889
contig380	94.041	26.011	18.294	0.0039	3.61543	1.85417
contig381	43.578	13.702	8.046	0.0039	3.18041	1.66921
